# Supplementary material for: Characterization of the gene expression profile response to drought stress in Haloxylon using PacBio single-molecule real-time and Illumina sequencing
Source: Front Plant Sci. 2022 Aug 16;13:981029. doi: 10.3389/fpls.2022.981029 (PMC9424927; doi:10.3389/fpls.2022.981029)
Supplement: Supplementary file 2 [file Table_2.XLSX]

## Sheet: LS vs. HS_DEG_GO_term
GO classification of H. ammodendron
GO_accession	Description	Term_type	Over_represented_pValue	Corrected_pValue	DEG_item	DEG_list	Bg_item	Bg_list	Gene_names
GO:0043531	ADP binding	molecular_function	4.0783e-22	1.4988e-18	428	8823	553	15445	transcript_HQ_BAB_transcript481/f2p0/4836,transcript_HQ_SAB_transcript1736/f2p0/3688,transcript_HQ_SAB_transcript4170/f3p0/3043,transcript_HQ_BAB_transcript2715/f8p0/3746,transcript_HQ_BAB_transcript18173/f2p0/1665,transcript_HQ_BAB_transcript1526/f5p0/4085,transcript_HQ_SAB_transcript470/f3p0/4494,transcript_HQ_BAB_transcript4466/f2p0/3400,transcript_HQ_BAB_transcript1002/f2p0/4409,transcript_HQ…
GO:0055114	oxidation-reduction process	biological_process	1.4822e-05	0.014399	953	8823	1538	15445	transcript_HQ_BAB_transcript12442/f2p0/2286,transcript_HQ_BAB_transcript19736/f2p0/1364,transcript_HQ_SAB_transcript6257/f5p0/2714,transcript_HQ_SAB_transcript3428/f3p0/3165,transcript_HQ_SAB_transcript7593/f6p0/2537,transcript_HQ_SAB_transcript22879/f2p0/1437,transcript_HQ_BAB_transcript18972/f4p0/1495,transcript_HQ_SAB_transcript20520/f2p0/1623,transcript_HQ_SAB_transcript12889/f2p0/2069,transc…
GO:0000166	nucleotide binding	molecular_function	1.6621e-05	0.014399	2043	8823	3357	15445	transcript_HQ_BAB_transcript2497/f3p0/3817,transcript_HQ_SAB_transcript8331/f2p0/2487,transcript_HQ_BAB_transcript10423/f5p0/2444,transcript_HQ_SAB_transcript1536/f2p0/3733,transcript_HQ_SAB_transcript595/f2p0/4345,transcript_HQ_BAB_transcript1484/f4p0/4104,transcript_HQ_BAB_transcript3879/f2p0/3527,transcript_HQ_BAB_transcript16814/f3p0/1816,transcript_HQ_BAB_transcript648/f2p0/4639,transcript_H…
GO:1901265	nucleoside phosphate binding	molecular_function	1.6621e-05	0.014399	2043	8823	3357	15445	transcript_HQ_BAB_transcript13364/f2p0/2184,transcript_HQ_SAB_transcript3646/f6p0/3142,transcript_HQ_SAB_transcript3182/f3p0/3248,transcript_HQ_BAB_transcript656/f2p0/4676,transcript_HQ_BAB_transcript18339/f2p0/1649,transcript_HQ_SAB_transcript21036/f2p0/1553,transcript_HQ_SAB_transcript9572/f3p0/2333,transcript_HQ_SAB_transcript13078/f2p0/2049,transcript_HQ_BAB_transcript5274/f3p0/3232,transcrip…
GO:0036094	small molecule binding	molecular_function	1.959e-05	0.014399	2087	8823	3434	15445	transcript_HQ_BAB_transcript4413/f2p0/3423,transcript_HQ_SAB_transcript1235/f2p0/3883,transcript_HQ_BAB_transcript18140/f3p0/1666,transcript_HQ_BAB_transcript3770/f7p0/3504,transcript_HQ_SAB_transcript16436/f12p0/1783,transcript_HQ_BAB_transcript10386/f2p0/2550,transcript_HQ_SAB_transcript20595/f2p0/1583,transcript_HQ_BAB_transcript11250/f3p0/2430,transcript_HQ_SAB_transcript16733/f2p0/1819,trans…
GO:0044710	single-organism metabolic process	biological_process	2.4126e-05	0.014777	1888	8823	3130	15445	transcript_HQ_SAB_transcript15047/f2p0/1929,transcript_HQ_SAB_transcript6173/f6p0/2684,transcript_HQ_BAB_transcript3804/f2p0/3502,transcript_HQ_SAB_transcript20520/f2p0/1623,transcript_HQ_BAB_transcript13030/f5p0/2221,transcript_HQ_BAB_transcript18972/f4p0/1495,transcript_HQ_BAB_transcript19856/f2p0/1332,transcript_HQ_SAB_transcript3428/f3p0/3165,transcript_HQ_SAB_transcript32318/f2p0/571,transcr…
GO:0016491	oxidoreductase activity	molecular_function	4.5292e-05	0.023778	924	8823	1499	15445	transcript_HQ_SAB_transcript9559/f2p0/2271,transcript_HQ_SAB_transcript22192/f6p0/1416,transcript_HQ_SAB_transcript21885/f21p0/1476,transcript_HQ_SAB_transcript11564/f4p0/2229,transcript_HQ_SAB_transcript11853/f12p0/2083,transcript_HQ_SAB_transcript10343/f2p0/2266,transcript_HQ_SAB_transcript12539/f2p0/2098,transcript_HQ_SAB_transcript11105/f3p0/2218,transcript_HQ_BAB_transcript690/f2p0/4591,tran…
GO:0043168	anion binding	molecular_function	7.377e-05	0.033888	2020	8823	3334	15445	transcript_HQ_SAB_transcript737/f3p0/4221,transcript_HQ_BAB_transcript18021/f2p0/1676,transcript_HQ_SAB_transcript21345/f2p0/1531,transcript_HQ_BAB_transcript833/f4p0/4472,transcript_HQ_BAB_transcript7022/f2p0/2951,transcript_HQ_SAB_transcript175/f2p0/5177,transcript_HQ_BAB_transcript4759/f3p0/3310,transcript_HQ_BAB_transcript1374/f2p0/4225,transcript_HQ_SAB_transcript8312/f2p0/2471,transcript_HQ…
GO:0003824	catalytic activity	molecular_function	0.0001016	0.041487	4521	8823	7700	15445	transcript_HQ_SAB_transcript22099/f2p0/1489,transcript_HQ_SAB_transcript16646/f2p0/1820,transcript_HQ_SAB_transcript8277/f4p0/2470,transcript_HQ_SAB_transcript28861/f3p0/996,transcript_HQ_BAB_transcript7794/f4p0/2829,transcript_HQ_BAB_transcript1046/f2p0/4342,transcript_HQ_BAB_transcript17694/f4p0/1693,transcript_HQ_BAB_transcript15834/f2p0/1944,transcript_HQ_SAB_transcript29242/f14p0/897,transcr…
GO:0032553	ribonucleotide binding	molecular_function	0.00020923	0.076891	1759	8823	2898	15445	transcript_HQ_BAB_transcript1073/f3p0/4319,transcript_HQ_BAB_transcript4267/f2p0/3473,transcript_HQ_SAB_transcript18689/f2p0/1699,transcript_HQ_BAB_transcript12895/f7p0/2232,transcript_HQ_BAB_transcript11856/f9p0/2336,transcript_HQ_SAB_transcript5328/f2p0/2857,transcript_HQ_SAB_transcript1825/f8p0/3491,transcript_HQ_SAB_transcript7341/f2p0/2609,transcript_HQ_SAB_transcript25018/f3p0/1295,transcri…
GO:0097367	carbohydrate derivative binding	molecular_function	0.00023107	0.077199	1767	8823	2913	15445	transcript_HQ_BAB_transcript497/f2p0/4786,transcript_HQ_BAB_transcript4164/f2p0/3493,transcript_HQ_BAB_transcript12398/f2p0/2313,transcript_HQ_BAB_transcript6924/f2p0/2965,transcript_HQ_BAB_transcript2644/f2p0/3770,transcript_HQ_BAB_transcript712/f2p0/4561,transcript_HQ_SAB_transcript8149/f2p0/2506,transcript_HQ_BAB_transcript8551/f4p0/2749,transcript_HQ_SAB_transcript13615/f2p0/1998,transcript_H…
GO:0008443	phosphofructokinase activity	molecular_function	0.00028735	0.084522	27	8823	31	15445	transcript_HQ_BAB_transcript13125/f2p0/2216,transcript_HQ_BAB_transcript4252/f8p0/3393,transcript_HQ_BAB_transcript20408/f5p0/987,transcript_HQ_BAB_transcript10057/f2p0/2592,transcript_HQ_SAB_transcript11228/f7p0/2176,transcript_HQ_SAB_transcript13032/f2p0/2063,transcript_HQ_BAB_transcript11946/f6p0/2302,transcript_HQ_SAB_transcript13404/f3p0/2021,transcript_HQ_BAB_transcript13310/f3p0/2204,trans…
GO:0001883	purine nucleoside binding	molecular_function	0.00040371	0.084522	1731	8823	2857	15445	transcript_HQ_SAB_transcript16489/f2p0/1850,transcript_HQ_SAB_transcript11112/f3p0/2283,transcript_HQ_BAB_transcript645/f4p0/4621,transcript_HQ_BAB_transcript5471/f2p0/3206,transcript_HQ_SAB_transcript2377/f2p0/3462,transcript_HQ_BAB_transcript12877/f2p0/2275,transcript_HQ_BAB_transcript5517/f25p0/3065,transcript_HQ_SAB_transcript4788/f2p0/2922,transcript_HQ_SAB_transcript28796/f3p0/976,transcrip…
GO:0032549	ribonucleoside binding	molecular_function	0.00040371	0.084522	1731	8823	2857	15445	transcript_HQ_BAB_transcript375/f2p0/4970,transcript_HQ_SAB_transcript1503/f2p0/3776,transcript_HQ_BAB_transcript10285/f7p0/2499,transcript_HQ_SAB_transcript14019/f12p0/1957,transcript_HQ_SAB_transcript5629/f3p0/2794,transcript_HQ_BAB_transcript916/f3p0/4439,transcript_HQ_BAB_transcript2624/f2p0/3851,transcript_HQ_SAB_transcript388/f2p0/4650,transcript_HQ_BAB_transcript8277/f3p0/2788,transcript_H…
GO:0032550	purine ribonucleoside binding	molecular_function	0.00040371	0.084522	1731	8823	2857	15445	transcript_HQ_SAB_transcript10174/f2p0/2317,transcript_HQ_SAB_transcript130/f2p0/5423,transcript_HQ_SAB_transcript2610/f2p0/3407,transcript_HQ_BAB_transcript15084/f3p0/2032,transcript_HQ_SAB_transcript2332/f3p0/3465,transcript_HQ_SAB_transcript15915/f2p0/1885,transcript_HQ_BAB_transcript783/f3p0/4518,transcript_HQ_SAB_transcript20281/f2p0/1593,transcript_HQ_SAB_transcript15636/f5p0/1798,transcrip…
GO:0032555	purine ribonucleotide binding	molecular_function	0.00040371	0.084522	1731	8823	2857	15445	transcript_HQ_BAB_transcript8096/f8p0/2777,transcript_HQ_SAB_transcript515/f3p0/4435,transcript_HQ_BAB_transcript988/f3p0/4356,transcript_HQ_BAB_transcript4665/f2p0/3344,transcript_HQ_BAB_transcript10570/f3p0/2491,transcript_HQ_BAB_transcript11372/f2p0/2457,transcript_HQ_BAB_transcript11601/f2p0/2388,transcript_HQ_BAB_transcript3115/f9p0/3626,transcript_HQ_SAB_transcript317/f2p0/4784,transcript_H…
GO:0017076	purine nucleotide binding	molecular_function	0.00040587	0.084522	1738	8823	2869	15445	transcript_HQ_BAB_transcript9604/f2p0/2661,transcript_HQ_BAB_transcript2001/f2p0/3948,transcript_HQ_SAB_transcript17178/f2p0/1787,transcript_HQ_BAB_transcript9622/f2p0/2606,transcript_HQ_BAB_transcript15833/f3p0/1921,transcript_HQ_SAB_transcript3709/f2p0/2976,transcript_HQ_SAB_transcript3207/f2p0/3240,transcript_HQ_BAB_transcript705/f3p0/4593,transcript_HQ_SAB_transcript12485/f4p0/2031,transcript…
GO:0001882	nucleoside binding	molecular_function	0.00041398	0.084522	1732	8823	2859	15445	transcript_HQ_BAB_transcript4168/f2p0/3435,transcript_HQ_BAB_transcript5948/f2p0/3145,transcript_HQ_SAB_transcript2536/f2p0/3406,transcript_HQ_BAB_transcript9719/f2p0/2599,transcript_HQ_SAB_transcript12429/f11p0/2055,transcript_HQ_SAB_transcript1508/f2p0/3773,transcript_HQ_SAB_transcript7693/f5p0/2520,transcript_HQ_BAB_transcript848/f2p0/4458,transcript_HQ_BAB_transcript6024/f2p0/3115,transcript_…
GO:0016757	transferase activity, transferring glycosyl groups	molecular_function	0.00048496	0.093802	268	8823	410	15445	transcript_HQ_SAB_transcript16474/f2p0/1792,transcript_HQ_SAB_transcript11833/f2p0/2132,transcript_HQ_BAB_transcript7336/f2p0/2908,transcript_HQ_BAB_transcript16793/f2p0/1830,transcript_HQ_BAB_transcript17124/f6p0/1755,transcript_HQ_SAB_transcript11993/f7p0/2123,transcript_HQ_SAB_transcript6271/f2p0/2720,transcript_HQ_BAB_transcript13338/f7p0/2175,transcript_HQ_SAB_transcript4771/f2p0/2925,transc…
GO:0019200	carbohydrate kinase activity	molecular_function	0.00051785	0.095154	28	8823	33	15445	transcript_HQ_BAB_transcript1313/f3p0/4225,transcript_HQ_BAB_transcript12038/f2p0/2339,transcript_HQ_SAB_transcript28458/f10p0/1013,transcript_HQ_BAB_transcript13310/f3p0/2204,transcript_HQ_SAB_transcript11849/f2p0/2155,transcript_HQ_BAB_transcript10057/f2p0/2592,transcript_HQ_SAB_transcript13404/f3p0/2021,transcript_HQ_SAB_transcript13032/f2p0/2063,transcript_HQ_BAB_transcript11946/f6p0/2302,tra…
GO:0030554	adenyl nucleotide binding	molecular_function	0.00058781	0.10287	1634	8823	2695	15445	transcript_HQ_BAB_transcript1313/f3p0/4225,transcript_HQ_BAB_transcript2899/f2p0/3702,transcript_HQ_BAB_transcript566/f3p0/4753,transcript_HQ_BAB_transcript7794/f4p0/2829,transcript_HQ_BAB_transcript1046/f2p0/4342,transcript_HQ_BAB_transcript819/f5p0/4472,transcript_HQ_SAB_transcript19613/f2p0/1663,transcript_HQ_BAB_transcript18173/f2p0/1665,transcript_HQ_BAB_transcript5368/f2p0/3222,transcript_H…
GO:0016701	oxidoreductase activity, acting on single donors with incorporation of molecular oxygen	molecular_function	0.00064769	0.10521	90	8823	126	15445	transcript_HQ_BAB_transcript8661/f3p0/2733,transcript_HQ_BAB_transcript13096/f3p0/2229,transcript_HQ_BAB_transcript11860/f3p0/2359,transcript_HQ_BAB_transcript20187/f4p0/1099,transcript_HQ_BAB_transcript15206/f2p0/2001,transcript_HQ_SAB_transcript26077/f2p0/1218,transcript_HQ_BAB_transcript20367/f2p0/1043,transcript_HQ_SAB_transcript3688/f3p0/3117,transcript_HQ_BAB_transcript5521/f2p0/3207,transc…
GO:0032559	adenyl ribonucleotide binding	molecular_function	0.00065845	0.10521	1628	8823	2686	15445	transcript_HQ_SAB_transcript4651/f2p0/2941,transcript_HQ_SAB_transcript2683/f2p0/3370,transcript_HQ_BAB_transcript2357/f3p0/3874,transcript_HQ_BAB_transcript10349/f10p0/2509,transcript_HQ_SAB_transcript8560/f3p0/2444,transcript_HQ_SAB_transcript1578/f2p0/3723,transcript_HQ_BAB_transcript8735/f2p0/2735,transcript_HQ_SAB_transcript16129/f2p0/1849,transcript_HQ_BAB_transcript18565/f4p0/1538,transcri…
GO:0051213	dioxygenase activity	molecular_function	0.00070425	0.10784	68	8823	92	15445	transcript_HQ_SAB_transcript5395/f2p0/2843,transcript_HQ_SAB_transcript26572/f2p0/1204,transcript_HQ_SAB_transcript25606/f2p0/1272,transcript_HQ_BAB_transcript14390/f2p0/2070,transcript_HQ_SAB_transcript22724/f2p0/1451,transcript_HQ_SAB_transcript15313/f2p0/1836,transcript_HQ_SAB_transcript27441/f4p0/1089,transcript_HQ_BAB_transcript15079/f2p0/2013,transcript_HQ_SAB_transcript11340/f2p0/2204,tran…
GO:0016702	oxidoreductase activity, acting on single donors with incorporation of molecular oxygen, incorporation of two atoms of oxygen	molecular_function	0.00093127	0.1369	65	8823	88	15445	transcript_HQ_SAB_transcript13188/f3p0/2067,transcript_HQ_SAB_transcript23582/f2p0/1391,transcript_HQ_SAB_transcript11583/f2p0/2166,transcript_HQ_BAB_transcript17803/f3p0/1695,transcript_HQ_BAB_transcript6048/f3p0/3103,transcript_HQ_SAB_transcript8234/f2p0/2492,transcript_HQ_BAB_transcript4798/f2p0/3398,transcript_HQ_SAB_transcript3700/f4p0/3124,transcript_HQ_SAB_transcript3428/f3p0/3165,transcri…
GO:0016684	oxidoreductase activity, acting on peroxide as acceptor	molecular_function	0.0013079	0.18487	52	8823	70	15445	transcript_HQ_SAB_transcript26738/f4p0/1160,transcript_HQ_BAB_transcript15377/f60p0/1888,transcript_HQ_SAB_transcript25619/f3p0/1249,transcript_HQ_BAB_transcript6839/f2p0/3008,transcript_HQ_SAB_transcript25966/f10p0/1192,transcript_HQ_SAB_transcript15541/f5p0/1843,transcript_HQ_SAB_transcript29253/f4p0/934,transcript_HQ_SAB_transcript2733/f3p0/3380,transcript_HQ_BAB_transcript19823/f2p0/1273,tran…
GO:0004601	peroxidase activity	molecular_function	0.0020427	0.27803	47	8823	63	15445	transcript_HQ_SAB_transcript25966/f10p0/1192,transcript_HQ_SAB_transcript25619/f3p0/1249,transcript_HQ_BAB_transcript6839/f2p0/3008,transcript_HQ_SAB_transcript15541/f5p0/1843,transcript_HQ_SAB_transcript2733/f3p0/3380,transcript_HQ_SAB_transcript29253/f4p0/934,transcript_HQ_BAB_transcript20201/f2p0/1168,transcript_HQ_BAB_transcript19823/f2p0/1273,transcript_HQ_BAB_transcript15377/f60p0/1888,tran…
GO:0003872	6-phosphofructokinase activity	molecular_function	0.002274	0.29846	11	8823	11	15445	transcript_HQ_BAB_transcript13125/f2p0/2216,transcript_HQ_BAB_transcript13030/f5p0/2221,transcript_HQ_SAB_transcript11954/f2p0/2135,transcript_HQ_SAB_transcript13032/f2p0/2063,transcript_HQ_BAB_transcript11946/f6p0/2302,transcript_HQ_SAB_transcript11228/f7p0/2176,transcript_HQ_BAB_transcript13310/f3p0/2204,transcript_HQ_SAB_transcript11849/f2p0/2155,transcript_HQ_SAB_transcript12294/f2p0/2108,tra…
GO:0006979	response to oxidative stress	biological_process	0.0024044	0.30469	36	8823	47	15445	transcript_HQ_SAB_transcript12922/f2p0/2062,transcript_HQ_SAB_transcript24090/f2p0/1355,transcript_HQ_BAB_transcript20191/f4p0/1163,transcript_HQ_SAB_transcript28195/f17p0/985,transcript_HQ_SAB_transcript26440/f13p0/1156,transcript_HQ_BAB_transcript19702/f3p0/1360,transcript_HQ_SAB_transcript27140/f8p0/1127,transcript_HQ_SAB_transcript24194/f12p0/1338,transcript_HQ_SAB_transcript27036/f4p0/1137,t…
GO:0030244	cellulose biosynthetic process	biological_process	0.0025187	0.30854	39	8823	50	15445	transcript_HQ_BAB_transcript10331/f5p0/2511,transcript_HQ_BAB_transcript4958/f2p0/3283,transcript_HQ_SAB_transcript1138/f4p0/3926,transcript_HQ_BAB_transcript4653/f2p0/3347,transcript_HQ_BAB_transcript10134/f3p0/2554,transcript_HQ_BAB_transcript1687/f2p0/4074,transcript_HQ_SAB_transcript20899/f2p0/1561,transcript_HQ_BAB_transcript17410/f2p0/1745,transcript_HQ_SAB_transcript1553/f6p0/3746,transcri…
GO:0043167	ion binding	molecular_function	0.0032652	0.38414	3079	8823	5218	15445	transcript_HQ_BAB_transcript9798/f2p0/2618,transcript_HQ_SAB_transcript26508/f4p0/1180,transcript_HQ_SAB_transcript22549/f2p0/1453,transcript_HQ_SAB_transcript470/f3p0/4494,transcript_HQ_SAB_transcript10320/f2p0/2270,transcript_HQ_SAB_transcript3151/f2p0/3238,transcript_HQ_BAB_transcript18123/f8p0/1635,transcript_HQ_BAB_transcript20107/f2p0/1208,transcript_HQ_SAB_transcript28366/f3p0/1024,transcr…
GO:0044699	single-organism process	biological_process	0.0033691	0.38414	3171	8823	5410	15445	transcript_HQ_SAB_transcript10207/f2p0/2281,transcript_HQ_SAB_transcript26249/f3p0/1200,transcript_HQ_SAB_transcript28440/f4p0/1016,transcript_HQ_BAB_transcript17694/f4p0/1693,transcript_HQ_SAB_transcript15710/f7p0/1814,transcript_HQ_SAB_transcript5014/f2p0/2898,transcript_HQ_BAB_transcript2899/f2p0/3702,transcript_HQ_BAB_transcript1313/f3p0/4225,transcript_HQ_SAB_transcript22099/f2p0/1489,transc…
GO:0016758	transferase activity, transferring hexosyl groups	molecular_function	0.0034494	0.38414	188	8823	288	15445	transcript_HQ_SAB_transcript18575/f2p0/1703,transcript_HQ_BAB_transcript12251/f2p0/2301,transcript_HQ_SAB_transcript18281/f7p0/1716,transcript_HQ_SAB_transcript7787/f3p0/2524,transcript_HQ_BAB_transcript5757/f4p0/3125,transcript_HQ_BAB_transcript9800/f2p0/2598,transcript_HQ_SAB_transcript14172/f7p0/1973,transcript_HQ_SAB_transcript11627/f2p0/2159,transcript_HQ_SAB_transcript1188/f3p0/3911,transcr…
GO:0016209	antioxidant activity	molecular_function	0.0035591	0.3847	84	8823	123	15445	transcript_HQ_SAB_transcript13632/f6p0/1999,transcript_HQ_SAB_transcript24858/f7p0/1299,transcript_HQ_BAB_transcript17916/f3p0/1668,transcript_HQ_SAB_transcript15675/f4p0/1877,transcript_HQ_BAB_transcript18682/f2p0/1568,transcript_HQ_BAB_transcript8917/f2p0/2712,transcript_HQ_BAB_transcript18384/f3p0/1634,transcript_HQ_SAB_transcript9870/f3p0/2261,transcript_HQ_BAB_transcript19528/f2p0/1420,trans…
GO:0016717	oxidoreductase activity, acting on paired donors, with oxidation of a pair of donors resulting in the reduction of molecular oxygen to two molecules of water	molecular_function	0.0039359	0.41327	21	8823	25	15445	transcript_HQ_SAB_transcript21303/f3p0/1531,transcript_HQ_SAB_transcript21311/f4p0/1519,transcript_HQ_SAB_transcript24079/f2p0/1358,transcript_HQ_SAB_transcript19602/f2p0/1647,transcript_HQ_SAB_transcript10343/f2p0/2266,transcript_HQ_SAB_transcript10975/f2p0/2217,transcript_HQ_BAB_transcript18486/f2p0/1606,transcript_HQ_SAB_transcript19109/f3p0/1671,transcript_HQ_BAB_transcript18670/f2p0/1672,tra…

## Sheet: LS vs. HS_DEG_KEGG_pathway
KEGG enrichment analysis of H. ammodendron
Term	Database	ID	Input number	Background number	P-Value	Corrected P-Value	Input	Hyperlink
alpha-Linolenic acid metabolism	KEGG PATHWAY	ko00592	78	106	0.0463674	0.924827	transcript_HQ_SAB_transcript14026/f2p0/1979|transcript_HQ_SAB_transcript23560/f2p0/1401|transcript_HQ_SAB_transcript21191/f2p0/1545|transcript_HQ_SAB_transcript4687/f5p0/2927|transcript_HQ_SAB_transcript3102/f2p0/3254|transcript_HQ_BAB_transcript5669/f9p0/3132|transcript_HQ_SAB_transcript7509/f3p0/2589|transcript_HQ_BAB_transcript17509/f5p0/1736|transcript_HQ_BAB_transcript8060/f2p0/2817|transcri…	http://www.genome.jp/kegg-bin/show_pathway?ko00592/K01723%09red/K05894%09red/K10526%09red/K18857%09red/K08241%09red/K00232%09red/K16818%09red/K00454%09red/K10527%09red/K14674%09red/K10528%09red/K07513%09red/K10525%09red
Glycerophospholipid metabolism	KEGG PATHWAY	ko00564	95	137	0.0729696	0.924827	transcript_HQ_BAB_transcript6207/f4p0/3072|transcript_HQ_BAB_transcript19117/f2p0/1488|transcript_HQ_BAB_transcript13534/f8p0/2144|transcript_HQ_BAB_transcript12090/f2p0/2328|transcript_HQ_SAB_transcript4725/f2p0/2925|transcript_HQ_BAB_transcript19259/f3p0/1483|transcript_HQ_SAB_transcript11558/f3p0/2172|transcript_HQ_BAB_transcript6484/f13p0/2942|transcript_HQ_SAB_transcript14520/f2p0/1966|trans…	http://www.genome.jp/kegg-bin/show_pathway?ko00564/K00894%09red/K01114%09red/K01115%09red/K16818%09red/K15728%09red/K01126%09red/K14674%09red/K13513%09red/K00967%09red/K00968%09red/K00981%09red/K00993%09red/K01613%09red/K00901%09red/K00006%09red/K05929%09red/K13523%09red/K06130%09red/K16860%09red/K13508%09red/K14156%09red/K13506%09red
Ether lipid metabolism	KEGG PATHWAY	ko00565	42	54	0.0754362	0.924827	transcript_HQ_BAB_transcript6207/f4p0/3072|transcript_HQ_BAB_transcript7888/f2p0/2862|transcript_HQ_BAB_transcript5007/f2p0/3293|transcript_HQ_SAB_transcript4506/f2p0/2983|transcript_HQ_BAB_transcript12090/f2p0/2328|transcript_HQ_SAB_transcript4725/f2p0/2925|transcript_HQ_BAB_transcript18055/f2p0/1659|transcript_HQ_SAB_transcript4256/f4p0/3041|transcript_HQ_SAB_transcript2614/f4p0/3360|transcript…	http://www.genome.jp/kegg-bin/show_pathway?ko00565/K14674%09red/K16860%09red/K00993%09red/K01114%09red/K01115%09red
Linoleic acid metabolism	KEGG PATHWAY	ko00591	35	46	0.114459	0.924827	transcript_HQ_SAB_transcript14026/f2p0/1979|transcript_HQ_SAB_transcript3102/f2p0/3254|transcript_HQ_BAB_transcript5669/f9p0/3132|transcript_HQ_SAB_transcript3688/f3p0/3117|transcript_HQ_SAB_transcript3317/f11p0/3207|transcript_HQ_BAB_transcript5969/f2p0/3106|transcript_HQ_BAB_transcript7093/f2p0/2935|transcript_HQ_SAB_transcript15313/f2p0/1836|transcript_HQ_BAB_transcript6048/f3p0/3103|transcrip…	http://www.genome.jp/kegg-bin/show_pathway?ko00591/K14674%09red/K00454%09red/K15718%09red
Glycine, serine and threonine metabolism	KEGG PATHWAY	ko00260	66	96	0.128236	0.924827	transcript_HQ_BAB_transcript11935/f5p0/2343|transcript_HQ_BAB_transcript16915/f5p0/1816|transcript_HQ_BAB_transcript7751/f4p0/2833|transcript_HQ_BAB_transcript18476/f3p0/1615|transcript_HQ_SAB_transcript24794/f9p0/1249|transcript_HQ_SAB_transcript9459/f3p0/2354|transcript_HQ_BAB_transcript12749/f2p0/2248|transcript_HQ_SAB_transcript20186/f3p0/1617|transcript_HQ_SAB_transcript8729/f2p0/2418|transc…	http://www.genome.jp/kegg-bin/show_pathway?ko00260/K01079%09red/K15919%09red/K14085%09red/K01620%09red/K00600%09red/K00605%09red/K00830%09red/K00831%09red/K00872%09red/K00058%09red/K00130%09red/K01834%09red/K00281%09red/K01754%09red/K01695%09red/K01696%09red/K00827%09red/K00499%09red/K00928%09red/K15893%09red/K00276%09red/K00382%09red/K15633%09red
Pentose phosphate pathway	KEGG PATHWAY	ko00030	64	93	0.131214	0.924827	transcript_HQ_SAB_transcript22335/f2p0/1487|transcript_HQ_SAB_transcript20706/f2p0/1580|transcript_HQ_BAB_transcript13125/f2p0/2216|transcript_HQ_BAB_transcript9715/f2p0/2600|transcript_HQ_SAB_transcript24234/f4p0/1331|transcript_HQ_SAB_transcript26436/f7p0/1171|transcript_HQ_SAB_transcript11954/f2p0/2135|transcript_HQ_SAB_transcript11595/f4p0/2144|transcript_HQ_SAB_transcript11228/f7p0/2176|tran…	http://www.genome.jp/kegg-bin/show_pathway?ko00030/K03841%09red/K00850%09red/K00131%09red/K01835%09red/K00615%09red/K00895%09red/K01807%09red/K01057%09red/K00948%09red/K01623%09red/K00616%09red/K01810%09red/K00036%09red/K01783%09red/K00033%09red
Fructose and mannose metabolism	KEGG PATHWAY	ko00051	52	76	0.16781	0.924827	transcript_HQ_BAB_transcript16295/f2p0/1890|transcript_HQ_SAB_transcript8490/f2p0/2450|transcript_HQ_BAB_transcript12551/f3p0/2281|transcript_HQ_BAB_transcript13125/f2p0/2216|transcript_HQ_SAB_transcript1788/f2p0/3648|transcript_HQ_BAB_transcript10057/f2p0/2592|transcript_HQ_SAB_transcript11954/f2p0/2135|transcript_HQ_SAB_transcript21566/f5p0/1530|transcript_HQ_SAB_transcript11228/f7p0/2176|trans…	http://www.genome.jp/kegg-bin/show_pathway?ko00051/K03841%09red/K00850%09red/K00844%09red/K01103%09red/K01803%09red/K00895%09red/K01805%09red/K01711%09red/K01623%09red/K19355%09red/K00847%09red/K00011%09red/K00863%09red/K00008%09red/K05305%09red/K17497%09red
Porphyrin and chlorophyll metabolism	KEGG PATHWAY	ko00860	45	65	0.173433	0.924827	transcript_HQ_BAB_transcript18544/f3p0/1611|transcript_HQ_BAB_transcript13347/f2p0/2187|transcript_HQ_SAB_transcript33366/f2p0/405|transcript_HQ_BAB_transcript18993/f2p0/1573|transcript_HQ_BAB_transcript15938/f2p0/1913|transcript_HQ_BAB_transcript9604/f2p0/2661|transcript_HQ_SAB_transcript381/f121p0/4546|transcript_HQ_SAB_transcript2147/f2p0/3513|transcript_HQ_SAB_transcript19052/f5p0/1666|transc…	http://www.genome.jp/kegg-bin/show_pathway?ko00860/K02492%09red/K10960%09red/K02257%09red/K01772%09red/K13606%09red/K04035%09red/K01749%09red/K03405%09red/K01698%09red/K19073%09red/K13600%09red/K13071%09red/K03428%09red/K01885%09red/K03404%09red/K00228%09red/K00231%09red/K01845%09red/K03403%09red/K00218%09red/K01599%09red
Sesquiterpenoid and triterpenoid biosynthesis	KEGG PATHWAY	ko00909	19	24	0.173892	0.924827	transcript_HQ_SAB_transcript4616/f2p0/2953|transcript_HQ_SAB_transcript11097/f23p0/2170|transcript_HQ_SAB_transcript12898/f35p0/2032|transcript_HQ_BAB_transcript12703/f2p0/2245|transcript_HQ_SAB_transcript12806/f10p0/2023|transcript_HQ_BAB_transcript13499/f22p0/2122|transcript_HQ_SAB_transcript12264/f2p0/2089|transcript_HQ_BAB_transcript4125/f3p0/3456|transcript_HQ_BAB_transcript16007/f4p0/1899|t…	http://www.genome.jp/kegg-bin/show_pathway?ko00909/K00511%09red/K15813%09red/K15803%09red/K00801%09red
Inositol phosphate metabolism	KEGG PATHWAY	ko00562	49	72	0.183544	0.924827	transcript_HQ_SAB_transcript13168/f4p0/2028|transcript_HQ_BAB_transcript12090/f2p0/2328|transcript_HQ_BAB_transcript10417/f2p0/2511|transcript_HQ_SAB_transcript14074/f2p0/1968|transcript_HQ_SAB_transcript14520/f2p0/1966|transcript_HQ_SAB_transcript8428/f2p0/2457|transcript_HQ_BAB_transcript8613/f2p0/2750|transcript_HQ_SAB_transcript21040/f2p0/1585|transcript_HQ_BAB_transcript158/f9p0/5484|transcr…	http://www.genome.jp/kegg-bin/show_pathway?ko00562/K00915%09red/K00140%09red/K00469%09red/K01110%09red/K01803%09red/K10572%09red/K01114%09red/K15422%09red/K05857%09red/K00921%09red/K01858%09red/K00913%09red/K18081%09red/K19801%09red/K10047%09red/K00889%09red/K00888%09red
Photosynthesis - antenna proteins	KEGG PATHWAY	ko00196	22	29	0.185539	0.924827	transcript_HQ_SAB_transcript26216/f3p0/1209|transcript_HQ_SAB_transcript28308/f22p0/1013|transcript_HQ_SAB_transcript28941/f5p0/971|transcript_HQ_SAB_transcript25555/f2p0/1254|transcript_HQ_SAB_transcript26491/f13p0/1159|transcript_HQ_BAB_transcript20269/f2p0/1124|transcript_HQ_SAB_transcript25355/f4p0/1232|transcript_HQ_SAB_transcript26142/f2p0/1235|transcript_HQ_SAB_transcript23696/f3p0/1372|tr…	http://www.genome.jp/kegg-bin/show_pathway?ko00196/K08909%09red/K08908%09red/K08907%09red/K08915%09red/K08914%09red/K08917%09red/K08916%09red/K08910%09red/K08913%09red/K08912%09red
Carbon fixation in photosynthetic organisms	KEGG PATHWAY	ko00710	106	167	0.194302	0.924827	transcript_HQ_BAB_transcript12640/f2p0/2336|transcript_HQ_SAB_transcript11762/f4p0/2071|transcript_HQ_BAB_transcript15491/f2p0/1979|transcript_HQ_BAB_transcript17693/f3p0/1772|transcript_HQ_BAB_transcript8870/f4p0/2734|transcript_HQ_SAB_transcript25985/f3p0/1242|transcript_HQ_SAB_transcript19982/f2p0/1618|transcript_HQ_SAB_transcript21205/f5p0/1534|transcript_HQ_BAB_transcript19998/f3p0/1227|tran…	http://www.genome.jp/kegg-bin/show_pathway?ko00710/K00855%09red/K00615%09red/K01623%09red/K01602%09red/K00134%09red/K14454%09red/K00051%09red/K05298%09red/K01783%09red/K01006%09red/K01100%09red/K03841%09red/K01610%09red/K00927%09red/K01803%09red/K01807%09red/K01595%09red/K00029%09red/K00028%09red/K00025%09red/K00814%09red/K00026%09red
Other types of O-glycan biosynthesis	KEGG PATHWAY	ko00514	9	10	0.216049	0.924827	transcript_HQ_BAB_transcript2688/f3p0/3774|transcript_HQ_SAB_transcript15808/f2p0/1889|transcript_HQ_BAB_transcript2867/f3p0/3709|transcript_HQ_SAB_transcript398/f2p0/4613|transcript_HQ_BAB_transcript2493/f2p0/3819|transcript_HQ_SAB_transcript1533/f2p0/3767|transcript_HQ_BAB_transcript3315/f2p0/3609|transcript_HQ_BAB_transcript11663/f6p0/2339|transcript_HQ_SAB_transcript1679/f3p0/3706	http://www.genome.jp/kegg-bin/show_pathway?ko00514/K13667%09red/K09667%09red/K03691%09red
Plant-pathogen interaction	KEGG PATHWAY	ko04626	119	192	0.235387	0.924827	transcript_HQ_SAB_transcript1491/f2p0/3794|transcript_HQ_BAB_transcript7718/f4p0/2849|transcript_HQ_SAB_transcript2536/f2p0/3406|transcript_HQ_SAB_transcript1593/f4p0/3719|transcript_HQ_BAB_transcript6089/f3p0/3080|transcript_HQ_SAB_transcript29992/f3p0/870|transcript_HQ_BAB_transcript11444/f2p0/2384|transcript_HQ_BAB_transcript6078/f3p0/3095|transcript_HQ_BAB_transcript20198/f2p0/1165|transcript…	http://www.genome.jp/kegg-bin/show_pathway?ko04626/K13414%09red/K13416%09red/K09487%09red/K13457%09red/K13412%09red/K13413%09red/K13448%09red/K12795%09red/K13429%09red/K05391%09red/K18834%09red/K13456%09red/K04079%09red/K13447%09red/K13459%09red/K13430%09red/K13436%09red/K13424%09red/K02183%09red
Ascorbate and aldarate metabolism	KEGG PATHWAY	ko00053	45	68	0.236399	0.924827	transcript_HQ_SAB_transcript13118/f3p0/2062|transcript_HQ_BAB_transcript20282/f2p0/1118|transcript_HQ_BAB_transcript19528/f2p0/1420|transcript_HQ_SAB_transcript22817/f2p0/1445|transcript_HQ_SAB_transcript13984/f3p0/1985|transcript_HQ_BAB_transcript15378/f4p0/1893|transcript_HQ_SAB_transcript19183/f2p0/1691|transcript_HQ_SAB_transcript13841/f2p0/1995|transcript_HQ_BAB_transcript19760/f2p0/1333|tra…	http://www.genome.jp/kegg-bin/show_pathway?ko00053/K10046%09red/K00469%09red/K08232%09red/K00128%09red/K14085%09red/K00012%09red/K14190%09red/K10047%09red/K00434%09red
Endocytosis	KEGG PATHWAY	ko04144	130	211	0.239858	0.924827	transcript_HQ_BAB_transcript6207/f4p0/3072|transcript_HQ_SAB_transcript6483/f3p0/2682|transcript_HQ_BAB_transcript6371/f5p0/3037|transcript_HQ_SAB_transcript14849/f3p0/1930|transcript_HQ_SAB_transcript28511/f2p0/1016|transcript_HQ_SAB_transcript5050/f2p0/2889|transcript_HQ_SAB_transcript4725/f2p0/2925|transcript_HQ_BAB_transcript9128/f2p0/2677|transcript_HQ_SAB_transcript10753/f2p0/2230|transcrip…	http://www.genome.jp/kegg-bin/show_pathway?ko04144/K10591%09red/K01115%09red/K12471%09red/K19366%09red/K19367%09red/K12479%09red/K19476%09red/K18466%09red/K12193%09red/K12191%09red/K12196%09red/K18443%09red/K12194%09red/K18467%09red/K18468%09red/K12198%09red/K17917%09red/K12489%09red/K07937%09red/K12486%09red/K05756%09red/K12483%09red/K01528%09red/K18442%09red/K07897%09red/K11866%09red/K12183%09r…
Stilbenoid, diarylheptanoid and gingerol biosynthesis	KEGG PATHWAY	ko00945	12	15	0.240688	0.924827	transcript_HQ_BAB_transcript20137/f7p0/1187|transcript_HQ_BAB_transcript16761/f2p0/1837|transcript_HQ_SAB_transcript25041/f5p0/1277|transcript_HQ_SAB_transcript28657/f2p0/1011|transcript_HQ_BAB_transcript17357/f5p0/1748|transcript_HQ_SAB_transcript17595/f3p0/1769|transcript_HQ_SAB_transcript29070/f2p0/966|transcript_HQ_BAB_transcript16394/f5p0/1854|transcript_HQ_BAB_transcript19152/f3p0/1529|tran…	http://www.genome.jp/kegg-bin/show_pathway?ko00945/K16040%09red/K09754%09red/K00588%09red/K00487%09red/K00517%09red
Glycerolipid metabolism	KEGG PATHWAY	ko00561	50	77	0.252592	0.924827	transcript_HQ_BAB_transcript19117/f2p0/1488|transcript_HQ_SAB_transcript13118/f3p0/2062|transcript_HQ_SAB_transcript13984/f3p0/1985|transcript_HQ_BAB_transcript19259/f3p0/1483|transcript_HQ_BAB_transcript17089/f4p0/1776|transcript_HQ_BAB_transcript6484/f13p0/2942|transcript_HQ_BAB_transcript6728/f4p0/2969|transcript_HQ_SAB_transcript11993/f7p0/2123|transcript_HQ_SAB_transcript5780/f2p0/2753|trans…	http://www.genome.jp/kegg-bin/show_pathway?ko00561/K00679%09red/K09480%09red/K13523%09red/K13513%09red/K01054%09red/K03715%09red/K00128%09red/K13508%09red/K14085%09red/K00901%09red/K14674%09red/K00011%09red/K00863%09red/K15728%09red/K13506%09red/K11155%09red/K06119%09red/K06118%09red
Phagosome	KEGG PATHWAY	ko04145	56	87	0.252814	0.924827	transcript_HQ_SAB_transcript30746/f2p0/748|transcript_HQ_BAB_transcript20316/f2p0/1085|transcript_HQ_SAB_transcript20320/f3p0/1595|transcript_HQ_BAB_transcript17269/f5p0/1748|transcript_HQ_SAB_transcript8560/f3p0/2444|transcript_HQ_BAB_transcript9476/f5p0/2637|transcript_HQ_SAB_transcript13583/f13p0/1973|transcript_HQ_BAB_transcript20596/f2p0/681|transcript_HQ_SAB_transcript15745/f12p0/1852|trans…	http://www.genome.jp/kegg-bin/show_pathway?ko04145/K08057%09red/K09481%09red/K10956%09red/K07374%09red/K07375%09red/K07342%09red/K02151%09red/K00921%09red/K02144%09red/K02145%09red/K02146%09red/K02147%09red/K02150%09red/K02149%09red/K02155%09red/K02154%09red/K02153%09red/K02152%09red/K07897%09red/K04392%09red
One carbon pool by folate	KEGG PATHWAY	ko00670	20	28	0.257423	0.924827	transcript_HQ_BAB_transcript18598/f3p0/1582|transcript_HQ_SAB_transcript10738/f4p0/2228|transcript_HQ_BAB_transcript9280/f3p0/2655|transcript_HQ_BAB_transcript14504/f5p0/2053|transcript_HQ_BAB_transcript18951/f12p0/1499|transcript_HQ_SAB_transcript12187/f3p0/2136|transcript_HQ_SAB_transcript14972/f2p0/1937|transcript_HQ_BAB_transcript9189/f2p0/2685|transcript_HQ_SAB_transcript13295/f14p0/2004|tra…	http://www.genome.jp/kegg-bin/show_pathway?ko00670/K00600%09red/K01938%09red/K00602%09red/K00605%09red/K00297%09red
Starch and sucrose metabolism	KEGG PATHWAY	ko00500	129	211	0.262644	0.924827	transcript_HQ_SAB_transcript14404/f2p0/1959|transcript_HQ_SAB_transcript3006/f4p0/3230|transcript_HQ_SAB_transcript6237/f2p0/2735|transcript_HQ_SAB_transcript18955/f3p0/1679|transcript_HQ_SAB_transcript6546/f2p0/2673|transcript_HQ_BAB_transcript11339/f2p0/2429|transcript_HQ_SAB_transcript8490/f2p0/2450|transcript_HQ_SAB_transcript2241/f2p0/3502|transcript_HQ_SAB_transcript4202/f6p0/3004|transcrip…	http://www.genome.jp/kegg-bin/show_pathway?ko00500/K00703%09red/K00975%09red/K01177%09red/K16055%09red/K01810%09red/K00847%09red/K01187%09red/K00700%09red/K01188%09red/K00844%09red/K00705%09red/K00688%09red/K00012%09red/K01087%09red/K19892%09red/K15920%09red/K00963%09red/K00770%09red/K01835%09red/K13648%09red/K01194%09red/K08678%09red/K01051%09red/K08679%09red/K05349%09red/K00696%09red/K00695%09r…
Glyoxylate and dicarboxylate metabolism	KEGG PATHWAY	ko00630	67	106	0.264334	0.924827	transcript_HQ_SAB_transcript23508/f3p0/1394|transcript_HQ_BAB_transcript17977/f3p0/1614|transcript_HQ_BAB_transcript146/f68p0/5467|transcript_HQ_BAB_transcript18238/f2p0/1636|transcript_HQ_SAB_transcript24794/f9p0/1249|transcript_HQ_SAB_transcript27148/f2p0/1131|transcript_HQ_SAB_transcript13295/f14p0/2004|transcript_HQ_SAB_transcript19332/f7p0/1622|transcript_HQ_BAB_transcript2277/f3p0/3885|tran…	http://www.genome.jp/kegg-bin/show_pathway?ko00630/K03781%09red/K15893%09red/K01455%09red/K00830%09red/K15919%09red/K11517%09red/K00284%09red/K18121%09red/K01681%09red/K00025%09red/K00600%09red/K00281%09red/K01602%09red/K00382%09red/K01915%09red/K19269%09red/K00605%09red/K00122%09red/K00026%09red/K00626%09red/K01647%09red
Flavonoid biosynthesis	KEGG PATHWAY	ko00941	18	25	0.265162	0.924827	transcript_HQ_SAB_transcript28657/f2p0/1011|transcript_HQ_SAB_transcript27726/f3p0/1087|transcript_HQ_BAB_transcript20137/f7p0/1187|transcript_HQ_BAB_transcript16761/f2p0/1837|transcript_HQ_SAB_transcript22555/f2p0/1457|transcript_HQ_BAB_transcript18443/f2p0/1607|transcript_HQ_BAB_transcript18642/f2p0/1564|transcript_HQ_SAB_transcript17595/f3p0/1769|transcript_HQ_BAB_transcript19618/f2p0/1401|tra…	http://www.genome.jp/kegg-bin/show_pathway?ko00941/K08695%09red/K01859%09red/K00660%09red/K09754%09red/K00588%09red/K05278%09red/K00487%09red/K05280%09red
Riboflavin metabolism	KEGG PATHWAY	ko00740	5	5	0.274615	0.924827	transcript_HQ_SAB_transcript15652/f2p0/1894|transcript_HQ_BAB_transcript15897/f2p0/1941|transcript_HQ_BAB_transcript13437/f10p0/2124|transcript_HQ_BAB_transcript19881/f2p0/1318|transcript_HQ_SAB_transcript17171/f2p0/1786	http://www.genome.jp/kegg-bin/show_pathway?ko00740/K00793%09red/K14652%09red/K11752%09red
Carotenoid biosynthesis	KEGG PATHWAY	ko00906	27	40	0.279182	0.924827	transcript_HQ_SAB_transcript347/f2p0/4740|transcript_HQ_SAB_transcript10137/f3p0/2318|transcript_HQ_SAB_transcript383/f3p0/4652|transcript_HQ_SAB_transcript15760/f3p0/1840|transcript_HQ_BAB_transcript17303/f7p0/1695|transcript_HQ_SAB_transcript7621/f2p0/2582|transcript_HQ_BAB_transcript14390/f2p0/2070|transcript_HQ_BAB_transcript10066/f2p0/2558|transcript_HQ_BAB_transcript14107/f2p0/2099|transcri…	http://www.genome.jp/kegg-bin/show_pathway?ko00906/K15746%09red/K09841%09red/K09842%09red/K09843%09red/K02291%09red/K02293%09red/K06444%09red/K00514%09red/K09837%09red/K09840%09red/K06443%09red/K09839%09red/K09838%09red/K15747%09red
Plant hormone signal transduction	KEGG PATHWAY	ko04075	117	192	0.283835	0.924827	transcript_HQ_BAB_transcript13163/f3p0/2211|transcript_HQ_BAB_transcript9573/f5p0/2638|transcript_HQ_BAB_transcript6457/f6p0/2947|transcript_HQ_SAB_transcript1098/f2p0/3950|transcript_HQ_SAB_transcript2867/f2p0/3332|transcript_HQ_BAB_transcript9066/f2p0/2676|transcript_HQ_SAB_transcript5615/f6p0/2792|transcript_HQ_SAB_transcript7348/f3p0/2598|transcript_HQ_SAB_transcript16471/f3p0/1830|transcript…	http://www.genome.jp/kegg-bin/show_pathway?ko04075/K14486%09red/K14487%09red/K14484%09red/K14485%09red/K14488%09red/K14489%09red/K13946%09red/K13415%09red/K13416%09red/K14432%09red/K14431%09red/K14510%09red/K14512%09red/K14513%09red/K14514%09red/K14515%09red/K14495%09red/K14494%09red/K14497%09red/K14496%09red/K14491%09red/K14490%09red/K14493%09red/K14492%09red/K14498%09red/K14506%09red/K14505%09r…
Pyruvate metabolism	KEGG PATHWAY	ko00620	111	182	0.287611	0.924827	transcript_HQ_BAB_transcript15821/f5p0/1923|transcript_HQ_BAB_transcript12640/f2p0/2336|transcript_HQ_SAB_transcript13984/f3p0/1985|transcript_HQ_BAB_transcript19985/f2p0/1255|transcript_HQ_SAB_transcript11906/f2p0/2157|transcript_HQ_SAB_transcript11762/f4p0/2071|transcript_HQ_BAB_transcript2690/f5p0/3738|transcript_HQ_BAB_transcript13622/f3p0/2166|transcript_HQ_SAB_transcript6663/f2p0/2668|trans…	http://www.genome.jp/kegg-bin/show_pathway?ko00620/K01961%09red/K01649%09red/K14085%09red/K00873%09red/K11262%09red/K00627%09red/K00626%09red/K00051%09red/K01895%09red/K01069%09red/K01006%09red/K01759%09red/K01595%09red/K01610%09red/K02160%09red/K00161%09red/K00162%09red/K00128%09red/K00029%09red/K00028%09red/K00382%09red/K00025%09red/K00026%09red/K01962%09red
Glycolysis / Gluconeogenesis	KEGG PATHWAY	ko00010	122	201	0.2905	0.924827	transcript_HQ_BAB_transcript17286/f2p0/1769|transcript_HQ_SAB_transcript21191/f2p0/1545|transcript_HQ_BAB_transcript18476/f3p0/1615|transcript_HQ_SAB_transcript13984/f3p0/1985|transcript_HQ_SAB_transcript11564/f4p0/2229|transcript_HQ_BAB_transcript16441/f4p0/1857|transcript_HQ_SAB_transcript11906/f2p0/2157|transcript_HQ_SAB_transcript13032/f2p0/2063|transcript_HQ_BAB_transcript17693/f3p0/1772|tra…	http://www.genome.jp/kegg-bin/show_pathway?ko00010/K00850%09red/K01689%09red/K14085%09red/K00895%09red/K18857%09red/K01623%09red/K01810%09red/K00873%09red/K00627%09red/K00134%09red/K00131%09red/K01835%09red/K01834%09red/K01895%09red/K00844%09red/K01792%09red/K03841%09red/K01610%09red/K00927%09red/K01803%09red/K00161%09red/K00162%09red/K00128%09red/K01785%09red/K01568%09red/K00382%09red/K00121%09r…
Cyanoamino acid metabolism	KEGG PATHWAY	ko00460	29	44	0.301501	0.924827	transcript_HQ_BAB_transcript12236/f2p0/2305|transcript_HQ_BAB_transcript14718/f3p0/2070|transcript_HQ_BAB_transcript12831/f7p0/2214|transcript_HQ_SAB_transcript17413/f2p0/1775|transcript_HQ_BAB_transcript14504/f5p0/2053|transcript_HQ_BAB_transcript18233/f2p0/1634|transcript_HQ_BAB_transcript9189/f2p0/2685|transcript_HQ_BAB_transcript18008/f2p0/1658|transcript_HQ_SAB_transcript14147/f2p0/1978|tran…	http://www.genome.jp/kegg-bin/show_pathway?ko00460/K01188%09red/K18592%09red/K00600%09red/K13034%09red/K05349%09red/K01455%09red
Pentose and glucuronate interconversions	KEGG PATHWAY	ko00040	38	59	0.30174	0.924827	transcript_HQ_SAB_transcript17726/f2p0/1760|transcript_HQ_BAB_transcript6196/f2p0/3068|transcript_HQ_SAB_transcript13726/f11p0/1986|transcript_HQ_SAB_transcript13118/f3p0/2062|transcript_HQ_BAB_transcript14651/f3p0/2039|transcript_HQ_SAB_transcript21566/f5p0/1530|transcript_HQ_SAB_transcript13984/f3p0/1985|transcript_HQ_SAB_transcript17285/f4p0/1755|transcript_HQ_BAB_transcript10403/f2p0/2519|tra…	http://www.genome.jp/kegg-bin/show_pathway?ko00040/K00963%09red/K01805%09red/K00008%09red/K00128%09red/K01051%09red/K01783%09red/K00011%09red/K00012%09red/K01728%09red
Fatty acid biosynthesis	KEGG PATHWAY	ko00061	35	55	0.331126	0.924827	transcript_HQ_SAB_transcript4088/f2p0/3083|transcript_HQ_SAB_transcript21320/f2p0/1539|transcript_HQ_SAB_transcript23609/f2p0/1399|transcript_HQ_BAB_transcript7511/f2p0/2885|transcript_HQ_SAB_transcript5041/f2p0/2934|transcript_HQ_BAB_transcript11077/f6p0/2424|transcript_HQ_BAB_transcript6643/f5p0/2965|transcript_HQ_SAB_transcript15646/f3p0/1912|transcript_HQ_SAB_transcript17205/f4p0/1831|transcr…	http://www.genome.jp/kegg-bin/show_pathway?ko00061/K10781%09red/K10782%09red/K00059%09red/K01961%09red/K01962%09red/K02160%09red/K01897%09red/K11262%09red/K03921%09red/K00208%09red/K09458%09red
Butanoate metabolism	KEGG PATHWAY	ko00650	17	25	0.332631	0.924827	transcript_HQ_SAB_transcript23508/f3p0/1394|transcript_HQ_BAB_transcript10749/f2p0/2497|transcript_HQ_SAB_transcript15827/f3p0/1847|transcript_HQ_SAB_transcript14682/f16p0/1911|transcript_HQ_SAB_transcript17007/f6p0/1759|transcript_HQ_BAB_transcript15567/f4p0/1947|transcript_HQ_SAB_transcript13177/f2p0/2030|transcript_HQ_SAB_transcript17302/f2p0/1796|transcript_HQ_BAB_transcript18990/f2p0/1534|tr…	http://www.genome.jp/kegg-bin/show_pathway?ko00650/K01641%09red/K17761%09red/K16871%09red/K18121%09red/K01580%09red/K01653%09red/K01652%09red/K00626%09red
Glutathione metabolism	KEGG PATHWAY	ko00480	59	96	0.338595	0.924827	transcript_HQ_SAB_transcript26375/f9p0/1152|transcript_HQ_SAB_transcript30754/f5p0/798|transcript_HQ_BAB_transcript20282/f2p0/1118|transcript_HQ_BAB_transcript19528/f2p0/1420|transcript_HQ_BAB_transcript12236/f2p0/2305|transcript_HQ_SAB_transcript15397/f2p0/1894|transcript_HQ_BAB_transcript6579/f2p0/3040|transcript_HQ_SAB_transcript24090/f2p0/1355|transcript_HQ_SAB_transcript815/f2p0/4158|transcr…	http://www.genome.jp/kegg-bin/show_pathway?ko00480/K01919%09red/K10808%09red/K01255%09red/K01256%09red/K18592%09red/K00797%09red/K00432%09red/K00799%09red/K00383%09red/K00036%09red/K00031%09red/K00033%09red/K00434%09red/K01469%09red
Zeatin biosynthesis	KEGG PATHWAY	ko00908	10	14	0.357624	0.924827	transcript_HQ_SAB_transcript13670/f2p0/2016|transcript_HQ_SAB_transcript18734/f4p0/1695|transcript_HQ_SAB_transcript18396/f2p0/1722|transcript_HQ_SAB_transcript27184/f2p0/1130|transcript_HQ_BAB_transcript18386/f4p0/1606|transcript_HQ_BAB_transcript10810/f3p0/2457|transcript_HQ_SAB_transcript9754/f5p0/2315|transcript_HQ_SAB_transcript17774/f3p0/1753|transcript_HQ_BAB_transcript9076/f3p0/2723|trans…	http://www.genome.jp/kegg-bin/show_pathway?ko00908/K13495%09red/K00279%09red/K10760%09red
Phenylpropanoid biosynthesis	KEGG PATHWAY	ko00940	50	82	0.371743	0.924827	transcript_HQ_SAB_transcript20996/f3p0/1565|transcript_HQ_SAB_transcript17070/f2p0/1803|transcript_HQ_SAB_transcript7089/f182p0/2543|transcript_HQ_BAB_transcript18880/f2p0/1533|transcript_HQ_BAB_transcript19736/f2p0/1364|transcript_HQ_SAB_transcript10225/f3p0/2280|transcript_HQ_SAB_transcript24844/f2p0/1308|transcript_HQ_SAB_transcript18343/f4p0/1719|transcript_HQ_SAB_transcript29438/f2p0/929|tra…	http://www.genome.jp/kegg-bin/show_pathway?ko00940/K10775%09red/K13066%09red/K01188%09red/K00083%09red/K12355%09red/K01904%09red/K09755%09red/K09754%09red/K05349%09red/K00588%09red/K00487%09red/K00430%09red/K09753%09red
Biosynthesis of unsaturated fatty acids	KEGG PATHWAY	ko01040	20	31	0.374673	0.924827	transcript_HQ_SAB_transcript17205/f4p0/1831|transcript_HQ_SAB_transcript18599/f4p0/1711|transcript_HQ_SAB_transcript8412/f3p0/2467|transcript_HQ_BAB_transcript10988/f2p0/2458|transcript_HQ_SAB_transcript7952/f2p0/2500|transcript_HQ_BAB_transcript8060/f2p0/2817|transcript_HQ_BAB_transcript18486/f2p0/1606|transcript_HQ_BAB_transcript19253/f2p0/1467|transcript_HQ_SAB_transcript19194/f4p0/1649|transc…	http://www.genome.jp/kegg-bin/show_pathway?ko01040/K00059%09red/K00232%09red/K10258%09red/K10256%09red/K07513%09red/K03921%09red
Taurine and hypotaurine metabolism	KEGG PATHWAY	ko00430	12	18	0.396279	0.924827	transcript_HQ_SAB_transcript26169/f2p0/1203|transcript_HQ_SAB_transcript26914/f2p0/1148|transcript_HQ_SAB_transcript14682/f16p0/1911|transcript_HQ_SAB_transcript26797/f2p0/1188|transcript_HQ_BAB_transcript15567/f4p0/1947|transcript_HQ_BAB_transcript12236/f2p0/2305|transcript_HQ_SAB_transcript10697/f13p0/2206|transcript_HQ_SAB_transcript21933/f2p0/1509|transcript_HQ_SAB_transcript15047/f2p0/1929|t…	http://www.genome.jp/kegg-bin/show_pathway?ko00430/K10712%09red/K01580%09red/K18592%09red
Fatty acid degradation	KEGG PATHWAY	ko00071	44	73	0.40641	0.924827	transcript_HQ_SAB_transcript4088/f2p0/3083|transcript_HQ_SAB_transcript23560/f2p0/1401|transcript_HQ_SAB_transcript21191/f2p0/1545|transcript_HQ_SAB_transcript13118/f3p0/2062|transcript_HQ_SAB_transcript5310/f3p0/2838|transcript_HQ_BAB_transcript9294/f2p0/2671|transcript_HQ_BAB_transcript8060/f2p0/2817|transcript_HQ_SAB_transcript13984/f3p0/1985|transcript_HQ_BAB_transcript6263/f2p0/3066|transcri…	http://www.genome.jp/kegg-bin/show_pathway?ko00071/K18857%09red/K00128%09red/K00232%09red/K10527%09red/K14085%09red/K01897%09red/K00121%09red/K07513%09red/K00626%09red
Amino sugar and nucleotide sugar metabolism	KEGG PATHWAY	ko00520	93	158	0.407763	0.924827	transcript_HQ_BAB_transcript17054/f2p0/1788|transcript_HQ_SAB_transcript6237/f2p0/2735|transcript_HQ_SAB_transcript18955/f3p0/1679|transcript_HQ_SAB_transcript5283/f3p0/2850|transcript_HQ_BAB_transcript11339/f2p0/2429|transcript_HQ_SAB_transcript8490/f2p0/2450|transcript_HQ_SAB_transcript25574/f2p0/1250|transcript_HQ_BAB_transcript14006/f2p0/2101|transcript_HQ_SAB_transcript28003/f2p0/1068|transc…	http://www.genome.jp/kegg-bin/show_pathway?ko00520/K00972%09red/K00975%09red/K05305%09red/K12373%09red/K01810%09red/K12450%09red/K01183%09red/K18677%09red/K08678%09red/K08679%09red/K00844%09red/K00012%09red/K17497%09red/K00847%09red/K15920%09red/K00963%09red/K01711%09red/K12446%09red/K12448%09red/K10046%09red/K06118%09red/K13648%09red/K00770%09red/K01835%09red/K01784%09red/K13379%09red
Aminoacyl-tRNA biosynthesis	KEGG PATHWAY	ko00970	63	106	0.409663	0.924827	transcript_HQ_BAB_transcript1234/f2p0/4230|transcript_HQ_BAB_transcript10640/f2p0/2493|transcript_HQ_BAB_transcript8307/f3p0/2802|transcript_HQ_BAB_transcript2934/f4p0/3689|transcript_HQ_SAB_transcript12259/f3p0/2111|transcript_HQ_SAB_transcript11471/f3p0/2201|transcript_HQ_BAB_transcript7794/f4p0/2829|transcript_HQ_BAB_transcript4565/f3p0/3362|transcript_HQ_BAB_transcript3080/f4p0/3655|transcrip…	http://www.genome.jp/kegg-bin/show_pathway?ko00970/K02434%09red/K01885%09red/K14164%09red/K01890%09red/K01876%09red/K01872%09red/K04567%09red/K01880%09red/K01870%09red/K01873%09red/K01883%09red/K01875%09red/K01867%09red/K01886%09red/K01887%09red/K01866%09red/K01889%09red/K01868%09red/K01869%09red/K01892%09red/K01874%09red
Sulfur metabolism	KEGG PATHWAY	ko00920	27	44	0.415339	0.924827	transcript_HQ_BAB_transcript18981/f6p0/1506|transcript_HQ_BAB_transcript15546/f2p0/1964|transcript_HQ_BAB_transcript10643/f3p0/2476|transcript_HQ_SAB_transcript14743/f2p0/1949|transcript_HQ_SAB_transcript10136/f2p0/2302|transcript_HQ_BAB_transcript16466/f3p0/1865|transcript_HQ_SAB_transcript19884/f3p0/1622|transcript_HQ_BAB_transcript17639/f2p0/1717|transcript_HQ_SAB_transcript14876/f8p0/1865|tra…	http://www.genome.jp/kegg-bin/show_pathway?ko00920/K05907%09red/K00392%09red/K08738%09red/K01011%09red/K00640%09red/K13811%09red/K00387%09red/K13034%09red/K15422%09red/K01738%09red/K01739%09red
Glycosaminoglycan degradation	KEGG PATHWAY	ko00531	8	12	0.442356	0.924827	transcript_HQ_BAB_transcript14136/f4p0/2091|transcript_HQ_BAB_transcript14514/f2p0/2065|transcript_HQ_BAB_transcript12634/f4p0/2242|transcript_HQ_SAB_transcript17748/f2p0/1797|transcript_HQ_SAB_transcript9848/f2p0/2315|transcript_HQ_BAB_transcript9457/f2p0/2660|transcript_HQ_BAB_transcript12994/f2p0/2219|transcript_HQ_SAB_transcript18748/f2p0/1692	http://www.genome.jp/kegg-bin/show_pathway?ko00531/K10532%09red/K07964%09red/K12309%09red/K12373%09red/K01205%09red
beta-Alanine metabolism	KEGG PATHWAY	ko00410	42	71	0.447289	0.924827	transcript_HQ_BAB_transcript1993/f2p0/3963|transcript_HQ_SAB_transcript4784/f2p0/2930|transcript_HQ_SAB_transcript11924/f4p0/2145|transcript_HQ_BAB_transcript7751/f4p0/2833|transcript_HQ_SAB_transcript13118/f3p0/2062|transcript_HQ_SAB_transcript13984/f3p0/1985|transcript_HQ_SAB_transcript21571/f3p0/1517|transcript_HQ_SAB_transcript10235/f3p0/2278|transcript_HQ_SAB_transcript2699/f2p0/3359|transcr…	http://www.genome.jp/kegg-bin/show_pathway?ko00410/K00140%09red/K17839%09red/K12259%09red/K05605%09red/K00276%09red/K00128%09red/K00797%09red/K01580%09red/K14085%09red/K13366%09red
Cutin, suberine and wax biosynthesis	KEGG PATHWAY	ko00073	5	7	0.450787	0.924827	transcript_HQ_SAB_transcript10725/f10p0/2227|transcript_HQ_SAB_transcript15003/f6p0/1879|transcript_HQ_SAB_transcript15459/f3p0/1936|transcript_HQ_SAB_transcript11331/f2p0/2193|transcript_HQ_SAB_transcript12992/f2p0/2052	http://www.genome.jp/kegg-bin/show_pathway?ko00073/K15404%09red/K15398%09red/K15401%09red/K15400%09red/K15402%09red
Cysteine and methionine metabolism	KEGG PATHWAY	ko00270	84	145	0.460317	0.924827	transcript_HQ_BAB_transcript7873/f11p0/2810|transcript_HQ_SAB_transcript20054/f2p0/1636|transcript_HQ_BAB_transcript15546/f2p0/1964|transcript_HQ_SAB_transcript12969/f3p0/2059|transcript_HQ_SAB_transcript11037/f9p0/2209|transcript_HQ_BAB_transcript1902/f2p0/3979|transcript_HQ_BAB_transcript16466/f3p0/1865|transcript_HQ_BAB_transcript7769/f10p0/2814|transcript_HQ_SAB_transcript21094/f2p0/1555|tran…	http://www.genome.jp/kegg-bin/show_pathway?ko00270/K00899%09red/K01244%09red/K01011%09red/K00811%09red/K00815%09red/K01761%09red/K01919%09red/K05933%09red/K14454%09red/K00640%09red/K00547%09red/K00789%09red/K01739%09red/K00549%09red/K08967%09red/K01251%09red/K08963%09red/K00797%09red/K00827%09red/K00826%09red/K01611%09red/K00928%09red/K01738%09red/K17398%09red/K00025%09red/K13034%09red/K00026%09r…
Nitrogen metabolism	KEGG PATHWAY	ko00910	36	61	0.461017	0.924827	transcript_HQ_SAB_transcript16056/f2p0/1854|transcript_HQ_BAB_transcript146/f68p0/5467|transcript_HQ_BAB_transcript18238/f2p0/1636|transcript_HQ_BAB_transcript276/f2p0/5163|transcript_HQ_SAB_transcript15272/f9p0/1864|transcript_HQ_SAB_transcript27148/f2p0/1131|transcript_HQ_SAB_transcript14187/f2p0/1982|transcript_HQ_BAB_transcript20347/f5p0/1051|transcript_HQ_SAB_transcript18557/f4p0/1707|transc…	http://www.genome.jp/kegg-bin/show_pathway?ko00910/K01673%09red/K00261%09red/K00264%09red/K00284%09red/K01674%09red/K01725%09red/K10534%09red/K01915%09red/K00366%09red/K01455%09red
Pantothenate and CoA biosynthesis	KEGG PATHWAY	ko00770	17	28	0.466595	0.924827	transcript_HQ_BAB_transcript17528/f2p0/1729|transcript_HQ_BAB_transcript12311/f3p0/2288|transcript_HQ_SAB_transcript19656/f2p0/1646|transcript_HQ_SAB_transcript10138/f3p0/2287|transcript_HQ_BAB_transcript11567/f2p0/2383|transcript_HQ_SAB_transcript17302/f2p0/1796|transcript_HQ_BAB_transcript10749/f2p0/2497|transcript_HQ_BAB_transcript16826/f3p0/1830|transcript_HQ_SAB_transcript3702/f5p0/3126|tran…	http://www.genome.jp/kegg-bin/show_pathway?ko00770/K01687%09red/K00859%09red/K00053%09red/K00826%09red/K09680%09red/K01653%09red/K01652%09red
Steroid biosynthesis	KEGG PATHWAY	ko00100	21	35	0.467668	0.924827	transcript_HQ_BAB_transcript17383/f3p0/1750|transcript_HQ_SAB_transcript11097/f23p0/2170|transcript_HQ_SAB_transcript12898/f35p0/2032|transcript_HQ_SAB_transcript13766/f5p0/1997|transcript_HQ_BAB_transcript17183/f4p0/1767|transcript_HQ_BAB_transcript13499/f22p0/2122|transcript_HQ_SAB_transcript12264/f2p0/2089|transcript_HQ_BAB_transcript12703/f2p0/2245|transcript_HQ_BAB_transcript16007/f4p0/1899|…	http://www.genome.jp/kegg-bin/show_pathway?ko00100/K05917%09red/K01052%09red/K08242%09red/K09828%09red/K09832%09red/K00511%09red/K14674%09red/K14423%09red/K00801%09red
Tyrosine metabolism	KEGG PATHWAY	ko00350	34	58	0.476532	0.924827	transcript_HQ_SAB_transcript23560/f2p0/1401|transcript_HQ_SAB_transcript21191/f2p0/1545|transcript_HQ_BAB_transcript7751/f4p0/2833|transcript_HQ_SAB_transcript27374/f2p0/1106|transcript_HQ_SAB_transcript17431/f2p0/1777|transcript_HQ_BAB_transcript17694/f4p0/1693|transcript_HQ_BAB_transcript20388/f2p0/1066|transcript_HQ_BAB_transcript14462/f3p0/2069|transcript_HQ_SAB_transcript2699/f2p0/3359|trans…	http://www.genome.jp/kegg-bin/show_pathway?ko00350/K00276%09red/K14454%09red/K00811%09red/K01800%09red/K01555%09red/K15849%09red/K18857%09red/K00451%09red/K01592%09red/K00815%09red/K00817%09red/K00121%09red/K00422%09red/K01557%09red
Selenocompound metabolism	KEGG PATHWAY	ko00450	31	53	0.485096	0.924827	transcript_HQ_BAB_transcript15124/f2p0/1991|transcript_HQ_SAB_transcript30394/f2p0/860|transcript_HQ_BAB_transcript15546/f2p0/1964|transcript_HQ_BAB_transcript10643/f3p0/2476|transcript_HQ_SAB_transcript4815/f2p0/2921|transcript_HQ_SAB_transcript19284/f2p0/1666|transcript_HQ_BAB_transcript19258/f5p0/1440|transcript_HQ_BAB_transcript7810/f8p0/2825|transcript_HQ_SAB_transcript14876/f8p0/1865|transc…	http://www.genome.jp/kegg-bin/show_pathway?ko00450/K11717%09red/K00384%09red/K13811%09red/K01874%09red/K08247%09red/K01761%09red/K01739%09red/K00549%09red
Monobactam biosynthesis	KEGG PATHWAY	ko00261	7	11	0.492775	0.924827	transcript_HQ_SAB_transcript8352/f4p0/2459|transcript_HQ_SAB_transcript14876/f8p0/1865|transcript_HQ_BAB_transcript15124/f2p0/1991|transcript_HQ_BAB_transcript10643/f3p0/2476|transcript_HQ_BAB_transcript12749/f2p0/2248|transcript_HQ_SAB_transcript11037/f9p0/2209|transcript_HQ_BAB_transcript12812/f3p0/2242	http://www.genome.jp/kegg-bin/show_pathway?ko00261/K00928%09red/K13811%09red
Vitamin B6 metabolism	KEGG PATHWAY	ko00750	7	11	0.492775	0.924827	transcript_HQ_BAB_transcript20063/f2p0/1233|transcript_HQ_BAB_transcript14939/f4p0/2018|transcript_HQ_SAB_transcript23421/f5p0/1381|transcript_HQ_SAB_transcript21152/f2p0/1562|transcript_HQ_BAB_transcript20187/f4p0/1099|transcript_HQ_SAB_transcript16799/f34p0/1785|transcript_HQ_BAB_transcript19526/f4p0/1387	http://www.genome.jp/kegg-bin/show_pathway?ko00750/K13248%09red/K06215%09red/K00275%09red/K00831%09red
Phenylalanine, tyrosine and tryptophan biosynthesis	KEGG PATHWAY	ko00400	32	55	0.492939	0.924827	transcript_HQ_SAB_transcript10241/f2p0/2271|transcript_HQ_BAB_transcript9876/f2p0/2585|transcript_HQ_SAB_transcript17431/f2p0/1777|transcript_HQ_SAB_transcript13863/f3p0/1996|transcript_HQ_BAB_transcript15229/f3p0/1980|transcript_HQ_SAB_transcript16687/f3p0/1808|transcript_HQ_BAB_transcript13701/f3p0/2125|transcript_HQ_SAB_transcript18034/f11p0/1708|transcript_HQ_SAB_transcript19417/f2p0/1674|tra…	http://www.genome.jp/kegg-bin/show_pathway?ko00400/K01817%09red/K14454%09red/K01695%09red/K01696%09red/K15849%09red/K01736%09red/K00811%09red/K01735%09red/K13832%09red/K00815%09red/K01626%09red/K00817%09red/K01657%09red/K00766%09red/K05359%09red/K15227%09red/K01609%09red
Histidine metabolism	KEGG PATHWAY	ko00340	16	27	0.500769	0.924827	transcript_HQ_SAB_transcript12236/f2p0/2108|transcript_HQ_SAB_transcript12522/f6p0/2008|transcript_HQ_SAB_transcript13118/f3p0/2062|transcript_HQ_SAB_transcript17082/f2p0/1794|transcript_HQ_SAB_transcript13984/f3p0/1985|transcript_HQ_SAB_transcript30894/f2p0/778|transcript_HQ_BAB_transcript18020/f2p0/1652|transcript_HQ_BAB_transcript17612/f11p0/1713|transcript_HQ_BAB_transcript15183/f9p0/1922|tra…	http://www.genome.jp/kegg-bin/show_pathway?ko00340/K00817%09red/K01693%09red/K00128%09red/K00765%09red/K01590%09red/K14085%09red
Arachidonic acid metabolism	KEGG PATHWAY	ko00590	8	13	0.50871	0.924827	transcript_HQ_BAB_transcript12236/f2p0/2305|transcript_HQ_SAB_transcript10697/f13p0/2206|transcript_HQ_SAB_transcript1543/f3p0/3726|transcript_HQ_SAB_transcript30033/f3p0/874|transcript_HQ_SAB_transcript28577/f6p0/999|transcript_HQ_SAB_transcript28195/f17p0/985|transcript_HQ_SAB_transcript11259/f2p0/2185|transcript_HQ_BAB_transcript12831/f7p0/2214	http://www.genome.jp/kegg-bin/show_pathway?ko00590/K00432%09red/K14674%09red/K18592%09red
Tropane, piperidine and pyridine alkaloid biosynthesis	KEGG PATHWAY	ko00960	22	38	0.516638	0.924827	transcript_HQ_BAB_transcript7751/f4p0/2833|transcript_HQ_SAB_transcript27030/f7p0/1128|transcript_HQ_SAB_transcript2699/f2p0/3359|transcript_HQ_BAB_transcript13701/f3p0/2125|transcript_HQ_BAB_transcript16982/f3p0/1813|transcript_HQ_BAB_transcript7363/f3p0/2916|transcript_HQ_SAB_transcript13399/f3p0/2024|transcript_HQ_BAB_transcript20297/f3p0/1113|transcript_HQ_SAB_transcript21094/f2p0/1555|transc…	http://www.genome.jp/kegg-bin/show_pathway?ko00960/K00276%09red/K14454%09red/K15849%09red/K00811%09red/K00815%09red/K08081%09red/K00817%09red
Isoquinoline alkaloid biosynthesis	KEGG PATHWAY	ko00950	22	38	0.516638	0.924827	transcript_HQ_BAB_transcript7751/f4p0/2833|transcript_HQ_BAB_transcript14462/f3p0/2069|transcript_HQ_SAB_transcript2699/f2p0/3359|transcript_HQ_SAB_transcript21676/f2p0/1531|transcript_HQ_SAB_transcript20520/f2p0/1623|transcript_HQ_BAB_transcript13701/f3p0/2125|transcript_HQ_SAB_transcript12994/f6p0/2029|transcript_HQ_BAB_transcript16982/f3p0/1813|transcript_HQ_SAB_transcript16107/f2p0/1931|trans…	http://www.genome.jp/kegg-bin/show_pathway?ko00950/K00276%09red/K14454%09red/K15849%09red/K13384%09red/K00811%09red/K01592%09red/K00815%09red/K00422%09red
Sulfur relay system	KEGG PATHWAY	ko04122	4	6	0.517791	0.924827	transcript_HQ_BAB_transcript16466/f3p0/1865|transcript_HQ_SAB_transcript15935/f2p0/1860|transcript_HQ_BAB_transcript15979/f2p0/1906|transcript_HQ_SAB_transcript16208/f2p0/1884	http://www.genome.jp/kegg-bin/show_pathway?ko04122/K14169%09red/K01011%09red
Synthesis and degradation of ketone bodies	KEGG PATHWAY	ko00072	4	6	0.517791	0.924827	transcript_HQ_BAB_transcript17826/f2p0/1683|transcript_HQ_SAB_transcript15827/f3p0/1847|transcript_HQ_BAB_transcript17690/f4p0/1697|transcript_HQ_SAB_transcript13177/f2p0/2030	http://www.genome.jp/kegg-bin/show_pathway?ko00072/K01641%09red/K00626%09red
Galactose metabolism	KEGG PATHWAY	ko00052	36	63	0.521866	0.924827	transcript_HQ_BAB_transcript16295/f2p0/1890|transcript_HQ_BAB_transcript19505/f2p0/1420|transcript_HQ_BAB_transcript12551/f3p0/2281|transcript_HQ_BAB_transcript13125/f2p0/2216|transcript_HQ_BAB_transcript3963/f2p0/3513|transcript_HQ_SAB_transcript11954/f2p0/2135|transcript_HQ_SAB_transcript10038/f6p0/2285|transcript_HQ_SAB_transcript4637/f2p0/2970|transcript_HQ_SAB_transcript13032/f2p0/2063|trans…	http://www.genome.jp/kegg-bin/show_pathway?ko00052/K01190%09red/K00850%09red/K01187%09red/K00963%09red/K01835%09red/K00844%09red/K18819%09red/K12309%09red/K01785%09red/K01784%09red/K06611%09red/K00011%09red/K06617%09red
Limonene and pinene degradation	KEGG PATHWAY	ko00903	9	15	0.522574	0.924827	transcript_HQ_SAB_transcript12236/f2p0/2108|transcript_HQ_SAB_transcript12522/f6p0/2008|transcript_HQ_SAB_transcript13118/f3p0/2062|transcript_HQ_SAB_transcript13984/f3p0/1985|transcript_HQ_BAB_transcript17612/f11p0/1713|transcript_HQ_BAB_transcript15183/f9p0/1922|transcript_HQ_BAB_transcript17459/f2p0/1742|transcript_HQ_SAB_transcript14697/f8p0/1867|transcript_HQ_SAB_transcript5780/f2p0/2753	http://www.genome.jp/kegg-bin/show_pathway?ko00903/K00128%09red/K00517%09red
DNA replication	KEGG PATHWAY	ko03030	14	24	0.526599	0.924827	transcript_HQ_SAB_transcript25629/f3p0/1250|transcript_HQ_BAB_transcript1464/f4p0/4109|transcript_HQ_BAB_transcript1478/f6p0/4114|transcript_HQ_BAB_transcript486/f2p0/4871|transcript_HQ_SAB_transcript7539/f2p0/2559|transcript_HQ_BAB_transcript4447/f7p0/3385|transcript_HQ_BAB_transcript7472/f8p0/2888|transcript_HQ_BAB_transcript4635/f6p0/3320|transcript_HQ_BAB_transcript6924/f2p0/2965|transcript_H…	http://www.genome.jp/kegg-bin/show_pathway?ko03030/K10754%09red/K10755%09red/K07466%09red/K10747%09red/K02320%09red/K04802%09red/K02540%09red/K02542%09red/K02335%09red
Circadian rhythm - plant	KEGG PATHWAY	ko04712	51	90	0.531778	0.924827	transcript_HQ_BAB_transcript3656/f3p0/3489|transcript_HQ_BAB_transcript11714/f50p0/2234|transcript_HQ_BAB_transcript6457/f6p0/2947|transcript_HQ_SAB_transcript714/f2p0/4233|transcript_HQ_BAB_transcript8994/f5p0/2688|transcript_HQ_BAB_transcript7279/f3p0/2922|transcript_HQ_BAB_transcript9266/f4p0/2646|transcript_HQ_BAB_transcript17478/f3p0/1744|transcript_HQ_SAB_transcript2957/f2p0/3285|transcript…	http://www.genome.jp/kegg-bin/show_pathway?ko04712/K10143%09red/K12118%09red/K12119%09red/K16240%09red/K12124%09red/K12116%09red/K12115%09red/K12121%09red/K12120%09red/K12127%09red/K03115%09red/K12125%09red/K12133%09red/K00660%09red/K12130%09red/K12129%09red/K03097%09red/K12126%09red
N-Glycan biosynthesis	KEGG PATHWAY	ko00510	24	42	0.53328	0.924827	transcript_HQ_SAB_transcript8343/f13p0/2416|transcript_HQ_SAB_transcript20491/f2p0/1593|transcript_HQ_SAB_transcript8556/f2p0/2460|transcript_HQ_BAB_transcript4818/f2p0/3321|transcript_HQ_SAB_transcript11328/f2p0/2197|transcript_HQ_BAB_transcript5045/f4p0/3283|transcript_HQ_BAB_transcript10808/f2p0/2476|transcript_HQ_SAB_transcript4519/f6p0/2948|transcript_HQ_SAB_transcript20172/f2p0/1608|transcr…	http://www.genome.jp/kegg-bin/show_pathway?ko00510/K12666%09red/K12667%09red/K03846%09red/K03845%09red/K12670%09red/K00737%09red/K00729%09red/K07151%09red/K05546%09red/K01228%09red/K07252%09red/K00902%09red/K01231%09red/K01230%09red
Thiamine metabolism	KEGG PATHWAY	ko00730	10	17	0.534882	0.924827	transcript_HQ_BAB_transcript12296/f22p0/2225|transcript_HQ_BAB_transcript10272/f6p0/2540|transcript_HQ_SAB_transcript5765/f2p0/2773|transcript_HQ_BAB_transcript7972/f2p0/2825|transcript_HQ_SAB_transcript14690/f5p0/1941|transcript_HQ_BAB_transcript18658/f2p0/1571|transcript_HQ_BAB_transcript12758/f2p0/2270|transcript_HQ_SAB_transcript9943/f3p0/2313|transcript_HQ_SAB_transcript6353/f2p0/2692|transc…	http://www.genome.jp/kegg-bin/show_pathway?ko00730/K14153%09red/K03147%09red/K03146%09red/K01662%09red
Mismatch repair	KEGG PATHWAY	ko03430	15	26	0.536641	0.924827	transcript_HQ_BAB_transcript9959/f2p0/2625|transcript_HQ_SAB_transcript25629/f3p0/1250|transcript_HQ_SAB_transcript5291/f2p0/2849|transcript_HQ_BAB_transcript1022/f2p0/4365|transcript_HQ_SAB_transcript7539/f2p0/2559|transcript_HQ_BAB_transcript4447/f7p0/3385|transcript_HQ_BAB_transcript988/f3p0/4356|transcript_HQ_BAB_transcript7556/f3p0/2880|transcript_HQ_BAB_transcript6924/f2p0/2965|transcript_H…	http://www.genome.jp/kegg-bin/show_pathway?ko03430/K08734%09red/K10747%09red/K10755%09red/K07466%09red/K08739%09red/K10754%09red/K04802%09red
Valine, leucine and isoleucine biosynthesis	KEGG PATHWAY	ko00290	20	35	0.538812	0.924827	transcript_HQ_BAB_transcript17528/f2p0/1729|transcript_HQ_BAB_transcript12311/f3p0/2288|transcript_HQ_SAB_transcript22657/f2p0/1451|transcript_HQ_SAB_transcript19656/f2p0/1646|transcript_HQ_SAB_transcript10138/f3p0/2287|transcript_HQ_BAB_transcript11567/f2p0/2383|transcript_HQ_SAB_transcript9560/f2p0/2342|transcript_HQ_SAB_transcript9374/f11p0/2274|transcript_HQ_BAB_transcript16267/f7p0/1872|tran…	http://www.genome.jp/kegg-bin/show_pathway?ko00290/K01754%09red/K01704%09red/K01687%09red/K00053%09red/K01649%09red/K00826%09red/K01652%09red/K01653%09red
Citrate cycle (TCA cycle)	KEGG PATHWAY	ko00020	50	89	0.551503	0.926582	transcript_HQ_BAB_transcript17581/f4p0/1707|transcript_HQ_SAB_transcript15965/f2p0/1885|transcript_HQ_SAB_transcript17372/f2p0/1780|transcript_HQ_SAB_transcript21868/f3p0/1512|transcript_HQ_SAB_transcript6541/f5p0/2661|transcript_HQ_SAB_transcript18895/f3p0/1700|transcript_HQ_BAB_transcript2277/f3p0/3885|transcript_HQ_SAB_transcript20060/f5p0/1614|transcript_HQ_SAB_transcript13877/f3p0/2026|trans…	http://www.genome.jp/kegg-bin/show_pathway?ko00020/K00235%09red/K00236%09red/K00658%09red/K00164%09red/K00161%09red/K00162%09red/K01681%09red/K01900%09red/K01648%09red/K00234%09red/K01610%09red/K00382%09red/K00025%09red/K00026%09red/K00627%09red/K01647%09red/K00030%09red/K00031%09red
Arginine and proline metabolism	KEGG PATHWAY	ko00330	58	104	0.568517	0.926582	transcript_HQ_BAB_transcript1993/f2p0/3963|transcript_HQ_SAB_transcript4784/f2p0/2930|transcript_HQ_SAB_transcript11924/f4p0/2145|transcript_HQ_SAB_transcript22297/f3p0/1474|transcript_HQ_SAB_transcript13118/f3p0/2062|transcript_HQ_SAB_transcript13984/f3p0/1985|transcript_HQ_SAB_transcript20377/f2p0/1601|transcript_HQ_SAB_transcript9559/f2p0/2271|transcript_HQ_SAB_transcript24731/f3p0/1325|transc…	http://www.genome.jp/kegg-bin/show_pathway?ko00330/K10536%09red/K17839%09red/K12259%09red/K14454%09red/K00286%09red/K12251%09red/K00472%09red/K01476%09red/K00128%09red/K00811%09red/K00797%09red/K00318%09red/K01611%09red/K01583%09red/K14085%09red/K13366%09red/K00819%09red/K01426%09red/K12657%09red
Spliceosome	KEGG PATHWAY	ko03040	176	316	0.59114	0.926582	transcript_HQ_BAB_transcript17902/f3p0/1667|transcript_HQ_BAB_transcript2879/f2p0/3709|transcript_HQ_BAB_transcript9128/f2p0/2677|transcript_HQ_BAB_transcript9598/f3p0/2622|transcript_HQ_SAB_transcript9415/f5p0/2270|transcript_HQ_BAB_transcript5932/f2p0/3118|transcript_HQ_SAB_transcript14143/f5p0/1967|transcript_HQ_BAB_transcript1790/f3p0/4023|transcript_HQ_SAB_transcript171/f2p0/5184|transcript_…	http://www.genome.jp/kegg-bin/show_pathway?ko03040/K12854%09red/K12870%09red/K10599%09red/K12862%09red/K12900%09red/K11086%09red/K06063%09red/K12867%09red/K12864%09red/K12865%09red/K12844%09red/K12869%09red/K12843%09red/K12828%09red/K12829%09red/K12873%09red/K12827%09red/K12824%09red/K12825%09red/K12822%09red/K12823%09red/K12820%09red/K12821%09red/K11984%09red/K12881%09red/K12855%09red/K13025%09r…
Tryptophan metabolism	KEGG PATHWAY	ko00380	22	40	0.592172	0.926582	transcript_HQ_SAB_transcript13118/f3p0/2062|transcript_HQ_SAB_transcript13984/f3p0/1985|transcript_HQ_SAB_transcript17415/f2p0/1766|transcript_HQ_BAB_transcript17826/f2p0/1683|transcript_HQ_SAB_transcript5780/f2p0/2753|transcript_HQ_SAB_transcript12236/f2p0/2108|transcript_HQ_BAB_transcript18761/f2p0/1548|transcript_HQ_BAB_transcript15183/f9p0/1922|transcript_HQ_BAB_transcript17089/f4p0/1776|tran…	http://www.genome.jp/kegg-bin/show_pathway?ko00380/K03781%09red/K00164%09red/K00128%09red/K14085%09red/K01426%09red/K00626%09red/K11820%09red
Proteasome	KEGG PATHWAY	ko03050	49	89	0.596351	0.926582	transcript_HQ_SAB_transcript25144/f3p0/1214|transcript_HQ_BAB_transcript3631/f2p0/3385|transcript_HQ_BAB_transcript2437/f4p0/3798|transcript_HQ_SAB_transcript30675/f2p0/835|transcript_HQ_BAB_transcript15784/f4p0/1923|transcript_HQ_BAB_transcript15662/f3p0/1948|transcript_HQ_SAB_transcript27844/f2p0/1102|transcript_HQ_SAB_transcript6173/f6p0/2684|transcript_HQ_SAB_transcript1239/f2p0/3874|transcri…	http://www.genome.jp/kegg-bin/show_pathway?ko03050/K03064%09red/K03065%09red/K03066%09red/K03061%09red/K03062%09red/K03063%09red/K03028%09red/K02728%09red/K02729%09red/K02725%09red/K02726%09red/K02727%09red/K03039%09red/K03038%09red/K03036%09red/K03035%09red/K03033%09red/K03032%09red/K11599%09red/K02738%09red/K06700%09red/K02732%09red/K02737%09red/K02735%09red/K02734%09red
Fatty acid elongation	KEGG PATHWAY	ko00062	12	22	0.606003	0.926582	transcript_HQ_SAB_transcript5214/f3p0/2883|transcript_HQ_BAB_transcript14457/f2p0/2066|transcript_HQ_BAB_transcript18656/f2p0/1577|transcript_HQ_BAB_transcript15954/f2p0/1916|transcript_HQ_BAB_transcript17473/f2p0/1741|transcript_HQ_BAB_transcript19253/f2p0/1467|transcript_HQ_SAB_transcript17191/f7p0/1791|transcript_HQ_SAB_transcript1253/f3p0/3861|transcript_HQ_BAB_transcript8532/f3p0/2802|transc…	http://www.genome.jp/kegg-bin/show_pathway?ko00062/K07512%09red/K15397%09red/K10258%09red
C5-Branched dibasic acid metabolism	KEGG PATHWAY	ko00660	7	13	0.625805	0.926582	transcript_HQ_BAB_transcript20087/f2p0/1222|transcript_HQ_SAB_transcript22657/f2p0/1451|transcript_HQ_BAB_transcript10749/f2p0/2497|transcript_HQ_SAB_transcript17302/f2p0/1796|transcript_HQ_BAB_transcript11019/f2p0/2454|transcript_HQ_BAB_transcript16267/f7p0/1872|transcript_HQ_SAB_transcript7608/f2p0/2571	http://www.genome.jp/kegg-bin/show_pathway?ko00660/K01653%09red/K01652%09red/K01704%09red
Sphingolipid metabolism	KEGG PATHWAY	ko00600	15	28	0.625836	0.926582	transcript_HQ_SAB_transcript5077/f2p0/2868|transcript_HQ_BAB_transcript912/f2p0/4448|transcript_HQ_BAB_transcript6810/f3p0/2985|transcript_HQ_SAB_transcript4843/f3p0/2932|transcript_HQ_BAB_transcript6751/f2p0/2970|transcript_HQ_SAB_transcript12920/f8p0/2022|transcript_HQ_SAB_transcript5033/f2p0/2906|transcript_HQ_BAB_transcript18680/f2p0/1559|transcript_HQ_BAB_transcript5956/f2p0/3126|transcript_…	http://www.genome.jp/kegg-bin/show_pathway?ko00600/K01190%09red/K17108%09red/K12309%09red/K04710%09red/K00654%09red/K12349%09red
Nicotinate and nicotinamide metabolism	KEGG PATHWAY	ko00760	10	19	0.642835	0.926582	transcript_HQ_SAB_transcript7229/f2p0/2590|transcript_HQ_SAB_transcript11212/f5p0/2166|transcript_HQ_BAB_transcript10133/f2p0/2563|transcript_HQ_BAB_transcript16351/f2p0/1869|transcript_HQ_BAB_transcript17703/f2p0/1734|transcript_HQ_BAB_transcript8793/f4p0/2665|transcript_HQ_SAB_transcript1700/f2p0/3697|transcript_HQ_BAB_transcript4497/f4p0/3359|transcript_HQ_BAB_transcript12776/f6p0/2181|transcr…	http://www.genome.jp/kegg-bin/show_pathway?ko00760/K03787%09red/K00278%09red/K00858%09red/K01240%09red/K00763%09red/K01950%09red/K03517%09red
Other glycan degradation	KEGG PATHWAY	ko00511	10	19	0.642835	0.926582	transcript_HQ_BAB_transcript1795/f2p0/4000|transcript_HQ_BAB_transcript912/f2p0/4448|transcript_HQ_BAB_transcript2620/f2p0/3780|transcript_HQ_SAB_transcript5077/f2p0/2868|transcript_HQ_BAB_transcript3804/f2p0/3502|transcript_HQ_SAB_transcript2135/f2p0/3538|transcript_HQ_SAB_transcript18380/f2p0/1717|transcript_HQ_BAB_transcript12634/f4p0/2242|transcript_HQ_SAB_transcript9848/f2p0/2315|transcript_…	http://www.genome.jp/kegg-bin/show_pathway?ko00511/K01190%09red/K01191%09red/K17108%09red/K12373%09red/K12309%09red/K01206%09red
Peroxisome	KEGG PATHWAY	ko04146	60	111	0.64427	0.926582	transcript_HQ_SAB_transcript4088/f2p0/3083|transcript_HQ_SAB_transcript25449/f2p0/1267|transcript_HQ_BAB_transcript18620/f2p0/1592|transcript_HQ_BAB_transcript8060/f2p0/2817|transcript_HQ_SAB_transcript29854/f4p0/835|transcript_HQ_BAB_transcript11077/f6p0/2424|transcript_HQ_SAB_transcript22859/f6p0/1352|transcript_HQ_SAB_transcript10813/f2p0/2225|transcript_HQ_BAB_transcript6347/f2p0/3043|transcr…	http://www.genome.jp/kegg-bin/show_pathway?ko04146/K11517%09red/K00830%09red/K11147%09red/K03781%09red/K04564%09red/K13348%09red/K04565%09red/K13237%09red/K01897%09red/K13342%09red/K13344%09red/K13345%09red/K00031%09red/K12261%09red/K00869%09red/K13354%09red/K06664%09red/K13337%09red/K13339%09red/K13338%09red/K00477%09red/K00232%09red/K07513%09red
mRNA surveillance pathway	KEGG PATHWAY	ko03015	87	162	0.680616	0.926582	transcript_HQ_SAB_transcript27749/f2p0/1086|transcript_HQ_BAB_transcript13328/f3p0/2185|transcript_HQ_SAB_transcript2281/f2p0/3467|transcript_HQ_SAB_transcript9267/f2p0/2368|transcript_HQ_BAB_transcript2793/f5p0/3730|transcript_HQ_SAB_transcript5238/f4p0/2849|transcript_HQ_SAB_transcript11231/f3p0/2183|transcript_HQ_BAB_transcript5209/f3p0/3266|transcript_HQ_BAB_transcript16969/f12p0/1735|transcr…	http://www.genome.jp/kegg-bin/show_pathway?ko03015/K13114%09red/K03267%09red/K14328%09red/K14327%09red/K14326%09red/K14324%09red/K04354%09red/K06100%09red/K12881%09red/K13025%09red/K11584%09red/K13126%09red/K03456%09red/K13917%09red/K06269%09red/K12875%09red/K12812%09red/K12876%09red/K14402%09red/K14411%09red/K04382%09red/K14376%09red/K14403%09red/K14398%09red/K03265%09red/K14408%09red/K14409%09r…
Lysine biosynthesis	KEGG PATHWAY	ko00300	7	14	0.684352	0.926582	transcript_HQ_BAB_transcript12749/f2p0/2248|transcript_HQ_SAB_transcript11037/f9p0/2209|transcript_HQ_SAB_transcript15000/f4p0/1942|transcript_HQ_BAB_transcript16621/f12p0/1826|transcript_HQ_BAB_transcript16939/f2p0/1827|transcript_HQ_BAB_transcript17089/f4p0/1776|transcript_HQ_BAB_transcript12812/f3p0/2242	http://www.genome.jp/kegg-bin/show_pathway?ko00300/K00928%09red/K10206%09red/K01586%09red/K14085%09red
Valine, leucine and isoleucine degradation	KEGG PATHWAY	ko00280	36	69	0.690729	0.926582	transcript_HQ_SAB_transcript17372/f2p0/1780|transcript_HQ_SAB_transcript13118/f3p0/2062|transcript_HQ_SAB_transcript14877/f2p0/1922|transcript_HQ_SAB_transcript23603/f2p0/1411|transcript_HQ_SAB_transcript13984/f3p0/1985|transcript_HQ_SAB_transcript10140/f2p0/2273|transcript_HQ_SAB_transcript21571/f3p0/1517|transcript_HQ_BAB_transcript17826/f2p0/1683|transcript_HQ_SAB_transcript5780/f2p0/2753|tran…	http://www.genome.jp/kegg-bin/show_pathway?ko00280/K00140%09red/K07513%09red/K05605%09red/K18660%09red/K00626%09red/K00128%09red/K00827%09red/K00826%09red/K00382%09red/K14085%09red/K00253%09red/K01641%09red/K00020%09red/K01969%09red
ABC transporters	KEGG PATHWAY	ko02010	14	28	0.702801	0.926582	transcript_HQ_SAB_transcript280/f2p0/4909|transcript_HQ_BAB_transcript200/f3p0/5356|transcript_HQ_BAB_transcript2303/f2p0/3883|transcript_HQ_BAB_transcript399/f3p0/4953|transcript_HQ_BAB_transcript9794/f2p0/2602|transcript_HQ_BAB_transcript1264/f2p0/4228|transcript_HQ_SAB_transcript674/f2p0/4248|transcript_HQ_BAB_transcript481/f2p0/4836|transcript_HQ_SAB_transcript281/f2p0/4921|transcript_HQ_BAB_…	http://www.genome.jp/kegg-bin/show_pathway?ko02010/K05674%09red/K05656%09red/K05658%09red/K05666%09red
Alanine, aspartate and glutamate metabolism	KEGG PATHWAY	ko00250	37	72	0.718711	0.926582	transcript_HQ_SAB_transcript16056/f2p0/1854|transcript_HQ_BAB_transcript18238/f2p0/1636|transcript_HQ_SAB_transcript17007/f6p0/1759|transcript_HQ_SAB_transcript27148/f2p0/1131|transcript_HQ_BAB_transcript17977/f3p0/1614|transcript_HQ_BAB_transcript1741/f5p0/4004|transcript_HQ_SAB_transcript18557/f4p0/1707|transcript_HQ_SAB_transcript14939/f2p0/1926|transcript_HQ_SAB_transcript23705/f2p0/1378|tran…	http://www.genome.jp/kegg-bin/show_pathway?ko00250/K01755%09red/K01756%09red/K01955%09red/K14454%09red/K00264%09red/K01956%09red/K13566%09red/K17761%09red/K00278%09red/K00261%09red/K01953%09red/K00811%09red/K00827%09red/K16871%09red/K00814%09red/K01939%09red/K00830%09red/K01915%09red/K00609%09red/K00764%09red/K01580%09red
RNA degradation	KEGG PATHWAY	ko03018	72	137	0.722286	0.926582	transcript_HQ_BAB_transcript5662/f2p0/3151|transcript_HQ_SAB_transcript505/f3p0/4441|transcript_HQ_SAB_transcript30253/f2p0/848|transcript_HQ_SAB_transcript11954/f2p0/2135|transcript_HQ_SAB_transcript22141/f2p0/1485|transcript_HQ_SAB_transcript27749/f2p0/1086|transcript_HQ_BAB_transcript7636/f2p0/2854|transcript_HQ_BAB_transcript215/f3p0/5342|transcript_HQ_BAB_transcript7822/f2p0/2838|transcript_…	http://www.genome.jp/kegg-bin/show_pathway?ko03018/K14442%09red/K07573%09red/K00850%09red/K00962%09red/K01689%09red/K12605%09red/K12604%09red/K12585%09red/K12614%09red/K12617%09red/K12616%09red/K12581%09red/K12580%09red/K12598%09red/K03654%09red/K12608%09red/K04077%09red/K12619%09red/K13126%09red/K12599%09red
Diterpenoid biosynthesis	KEGG PATHWAY	ko00904	7	15	0.736669	0.926582	transcript_HQ_SAB_transcript14395/f5p0/1955|transcript_HQ_BAB_transcript13150/f2p0/2203|transcript_HQ_SAB_transcript17619/f4p0/1668|transcript_HQ_BAB_transcript6448/f2p0/3021|transcript_HQ_BAB_transcript7155/f2p0/2925|transcript_HQ_BAB_transcript8048/f3p0/2805|transcript_HQ_BAB_transcript18753/f2p0/1558	http://www.genome.jp/kegg-bin/show_pathway?ko00904/K17982%09red/K04125%09red/K04121%09red/K17961%09red
Propanoate metabolism	KEGG PATHWAY	ko00640	27	54	0.739618	0.926582	transcript_HQ_SAB_transcript15965/f2p0/1885|transcript_HQ_SAB_transcript17372/f2p0/1780|transcript_HQ_BAB_transcript7511/f2p0/2885|transcript_HQ_SAB_transcript5041/f2p0/2934|transcript_HQ_BAB_transcript6812/f2p0/2991|transcript_HQ_SAB_transcript21571/f3p0/1517|transcript_HQ_BAB_transcript17690/f4p0/1697|transcript_HQ_BAB_transcript9935/f3p0/2581|transcript_HQ_BAB_transcript15821/f5p0/1923|transcr…	http://www.genome.jp/kegg-bin/show_pathway?ko00640/K00140%09red/K00382%09red/K05605%09red/K01900%09red/K01962%09red/K02160%09red/K01961%09red/K01895%09red/K11262%09red/K00626%09red
SNARE interactions in vesicular transport	KEGG PATHWAY	ko04130	10	22	0.775129	0.926582	transcript_HQ_SAB_transcript27215/f8p0/1110|transcript_HQ_SAB_transcript26453/f4p0/1190|transcript_HQ_BAB_transcript20041/f2p0/1242|transcript_HQ_BAB_transcript19848/f2p0/1317|transcript_HQ_BAB_transcript18092/f2p0/1657|transcript_HQ_BAB_transcript19138/f2p0/1487|transcript_HQ_SAB_transcript28366/f3p0/1024|transcript_HQ_SAB_transcript25407/f2p0/1264|transcript_HQ_SAB_transcript25300/f10p0/1259|tr…	http://www.genome.jp/kegg-bin/show_pathway?ko04130/K08490%09red/K08493%09red/K08503%09red/K08506%09red/K08507%09red/K08515%09red
Photosynthesis	KEGG PATHWAY	ko00195	51	101	0.7754	0.926582	transcript_HQ_SAB_transcript30933/f85p0/683|transcript_HQ_SAB_transcript31629/f5p0/662|transcript_HQ_SAB_transcript29174/f2p0/951|transcript_HQ_BAB_transcript20592/f5p0/681|transcript_HQ_SAB_transcript32246/f2p0/601|transcript_HQ_BAB_transcript11353/f2p0/2415|transcript_HQ_SAB_transcript30915/f2p0/781|transcript_HQ_SAB_transcript961/f3p0/4088|transcript_HQ_SAB_transcript30635/f9p0/736|transcript_…	http://www.genome.jp/kegg-bin/show_pathway?ko00195/K02113%09red/K02694%09red/K02692%09red/K02693%09red/K02698%09red/K02699%09red/K02115%09red/K02701%09red/K02641%09red/K02705%09red/K02704%09red/K02721%09red/K02723%09red/K02717%09red/K02689%09red/K02108%09red/K08905%09red/K14332%09red/K08901%09red/K02636%09red/K03542%09red/K03541%09red/K02716%09red/K02638%09red/K02639%09red/K02695%09red
Glycosylphosphatidylinositol(GPI)-anchor biosynthesis	KEGG PATHWAY	ko00563	8	18	0.779075	0.926582	transcript_HQ_SAB_transcript8040/f2p0/2500|transcript_HQ_BAB_transcript13970/f2p0/2102|transcript_HQ_BAB_transcript10107/f4p0/2527|transcript_HQ_BAB_transcript5073/f5p0/3273|transcript_HQ_BAB_transcript8163/f2p0/2797|transcript_HQ_BAB_transcript5925/f3p0/3141|transcript_HQ_BAB_transcript5040/f2p0/3289|transcript_HQ_BAB_transcript11646/f3p0/2372	http://www.genome.jp/kegg-bin/show_pathway?ko00563/K03859%09red/K03860%09red/K05289%09red/K05285%09red/K05283%09red/K05292%09red
Glycosphingolipid biosynthesis - ganglio series	KEGG PATHWAY	ko00604	2	5	0.785645	0.926582	transcript_HQ_SAB_transcript9848/f2p0/2315|transcript_HQ_BAB_transcript12634/f4p0/2242	http://www.genome.jp/kegg-bin/show_pathway?ko00604/K12309%09red/K12373%09red
Betalain biosynthesis	KEGG PATHWAY	ko00965	2	5	0.785645	0.926582	transcript_HQ_SAB_transcript26056/f2p0/1219|transcript_HQ_BAB_transcript20276/f2p0/1108	http://www.genome.jp/kegg-bin/show_pathway?ko00965/K15777%09red
Non-homologous end-joining	KEGG PATHWAY	ko03450	2	5	0.785645	0.926582	transcript_HQ_BAB_transcript11951/f2p0/2349|transcript_HQ_SAB_transcript1245/f2p0/3871	http://www.genome.jp/kegg-bin/show_pathway?ko03450/K10884%09red/K10777%09red
Phenylalanine metabolism	KEGG PATHWAY	ko00360	28	58	0.790455	0.926582	transcript_HQ_BAB_transcript7751/f4p0/2833|transcript_HQ_SAB_transcript7089/f182p0/2543|transcript_HQ_SAB_transcript21094/f2p0/1555|transcript_HQ_SAB_transcript2699/f2p0/3359|transcript_HQ_BAB_transcript13701/f3p0/2125|transcript_HQ_BAB_transcript18761/f2p0/1548|transcript_HQ_BAB_transcript16982/f3p0/1813|transcript_HQ_BAB_transcript7363/f3p0/2916|transcript_HQ_SAB_transcript13399/f3p0/2024|trans…	http://www.genome.jp/kegg-bin/show_pathway?ko00360/K00276%09red/K14454%09red/K01426%09red/K15849%09red/K00811%09red/K00815%09red/K00817%09red/K00588%09red/K00487%09red/K01904%09red/K10775%09red
Nucleotide excision repair	KEGG PATHWAY	ko03420	29	60	0.791974	0.926582	transcript_HQ_BAB_transcript7658/f2p0/2856|transcript_HQ_BAB_transcript1478/f6p0/4114|transcript_HQ_BAB_transcript12779/f3p0/2236|transcript_HQ_SAB_transcript328/f3p0/4738|transcript_HQ_SAB_transcript25378/f3p0/1264|transcript_HQ_SAB_transcript25629/f3p0/1250|transcript_HQ_BAB_transcript1464/f4p0/4109|transcript_HQ_SAB_transcript7539/f2p0/2559|transcript_HQ_BAB_transcript4860/f5p0/3318|transcript…	http://www.genome.jp/kegg-bin/show_pathway?ko03420/K10843%09red/K10754%09red/K10140%09red/K03868%09red/K10844%09red/K07466%09red/K10747%09red/K10839%09red/K10838%09red/K04802%09red/K10841%09red/K10846%09red/K02335%09red/K10848%09red/K10755%09red/K03141%09red
Biotin metabolism	KEGG PATHWAY	ko00780	5	12	0.79492	0.926582	transcript_HQ_SAB_transcript7451/f3p0/2590|transcript_HQ_BAB_transcript17592/f2p0/1756|transcript_HQ_BAB_transcript15344/f3p0/1994|transcript_HQ_SAB_transcript16963/f2p0/1807|transcript_HQ_SAB_transcript24819/f4p0/1297	http://www.genome.jp/kegg-bin/show_pathway?ko00780/K00208%09red/K00059%09red/K09458%09red
Protein export	KEGG PATHWAY	ko03060	31	64	0.795038	0.926582	transcript_HQ_SAB_transcript5132/f2p0/2859|transcript_HQ_SAB_transcript13404/f3p0/2021|transcript_HQ_SAB_transcript7184/f5p0/2601|transcript_HQ_SAB_transcript15745/f12p0/1852|transcript_HQ_BAB_transcript15189/f10p0/1951|transcript_HQ_BAB_transcript16579/f4p0/1839|transcript_HQ_BAB_transcript19584/f2p0/1408|transcript_HQ_SAB_transcript31066/f3p0/744|transcript_HQ_BAB_transcript13168/f4p0/2155|tran…	http://www.genome.jp/kegg-bin/show_pathway?ko03060/K03070%09red/K03217%09red/K09481%09red/K10956%09red/K07342%09red/K03110%09red/K12275%09red/K09490%09red/K03116%09red/K03108%09red/K03106%09red/K13431%09red/K12947%09red/K03100%09red
Pyrimidine metabolism	KEGG PATHWAY	ko00240	57	114	0.80371	0.926582	transcript_HQ_BAB_transcript359/f2p0/5030|transcript_HQ_BAB_transcript14387/f2p0/2070|transcript_HQ_SAB_transcript30394/f2p0/860|transcript_HQ_SAB_transcript28586/f3p0/1022|transcript_HQ_BAB_transcript6933/f3p0/2950|transcript_HQ_SAB_transcript17025/f2p0/1807|transcript_HQ_SAB_transcript11168/f2p0/2193|transcript_HQ_SAB_transcript28786/f2p0/1039|transcript_HQ_SAB_transcript7430/f2p0/2568|transcri…	http://www.genome.jp/kegg-bin/show_pathway?ko00240/K01240%09red/K03006%09red/K03021%09red/K03005%09red/K03002%09red/K03027%09red/K00609%09red/K02335%09red/K01937%09red/K00876%09red/K03008%09red/K03009%09red/K03787%09red/K01956%09red/K01955%09red/K13800%09red/K00962%09red/K02320%09red/K03014%09red/K03011%09red/K03010%09red/K03013%09red/K03012%09red/K00940%09red/K03018%09red/K00384%09red/K01489%09r…
Lysine degradation	KEGG PATHWAY	ko00310	18	39	0.804363	0.926582	transcript_HQ_BAB_transcript1954/f5p0/3898|transcript_HQ_SAB_transcript12236/f2p0/2108|transcript_HQ_SAB_transcript1903/f2p0/3613|transcript_HQ_SAB_transcript13118/f3p0/2062|transcript_HQ_SAB_transcript16769/f2p0/1878|transcript_HQ_BAB_transcript4772/f4p0/3274|transcript_HQ_SAB_transcript13984/f3p0/1985|transcript_HQ_SAB_transcript5780/f2p0/2753|transcript_HQ_BAB_transcript17612/f11p0/1713|transc…	http://www.genome.jp/kegg-bin/show_pathway?ko00310/K00658%09red/K00164%09red/K14157%09red/K00128%09red/K11420%09red/K14085%09red/K00626%09red
Homologous recombination	KEGG PATHWAY	ko03440	11	25	0.80821	0.926582	transcript_HQ_BAB_transcript419/f2p0/4940|transcript_HQ_BAB_transcript1464/f4p0/4109|transcript_HQ_BAB_transcript1478/f6p0/4114|transcript_HQ_BAB_transcript3944/f4p0/3472|transcript_HQ_SAB_transcript4119/f8p0/3026|transcript_HQ_BAB_transcript861/f3p0/4524|transcript_HQ_BAB_transcript458/f2p0/4915|transcript_HQ_SAB_transcript9229/f6p0/2366|transcript_HQ_BAB_transcript10094/f3p0/2555|transcript_HQ_…	http://www.genome.jp/kegg-bin/show_pathway?ko03440/K07466%09red/K10882%09red/K02335%09red/K03655%09red/K10875%09red
Base excision repair	KEGG PATHWAY	ko03410	10	23	0.810388	0.926582	transcript_HQ_SAB_transcript25629/f3p0/1250|transcript_HQ_SAB_transcript5291/f2p0/2849|transcript_HQ_BAB_transcript1478/f6p0/4114|transcript_HQ_SAB_transcript2163/f2p0/3517|transcript_HQ_SAB_transcript20375/f2p0/1600|transcript_HQ_BAB_transcript6924/f2p0/2965|transcript_HQ_SAB_transcript9216/f2p0/2373|transcript_HQ_BAB_transcript1356/f2p0/4217|transcript_HQ_BAB_transcript1464/f4p0/4109|transcript…	http://www.genome.jp/kegg-bin/show_pathway?ko03410/K10747%09red/K10798%09red/K04802%09red/K02335%09red/K10803%09red/K10801%09red
Arginine biosynthesis	KEGG PATHWAY	ko00220	23	50	0.829561	0.926582	transcript_HQ_SAB_transcript16926/f4p0/1797|transcript_HQ_BAB_transcript18238/f2p0/1636|transcript_HQ_SAB_transcript27148/f2p0/1131|transcript_HQ_SAB_transcript24731/f3p0/1325|transcript_HQ_SAB_transcript18557/f4p0/1707|transcript_HQ_SAB_transcript14939/f2p0/1926|transcript_HQ_BAB_transcript13701/f3p0/2125|transcript_HQ_BAB_transcript15605/f2p0/1949|transcript_HQ_BAB_transcript16982/f3p0/1813|tra…	http://www.genome.jp/kegg-bin/show_pathway?ko00220/K01755%09red/K00261%09red/K14454%09red/K01438%09red/K00811%09red/K01476%09red/K00814%09red/K14682%09red/K01915%09red/K00818%09red/K14677%09red
Regulation of autophagy	KEGG PATHWAY	ko04140	24	52	0.829948	0.926582	transcript_HQ_SAB_transcript13127/f2p0/2064|transcript_HQ_BAB_transcript17946/f2p0/1669|transcript_HQ_SAB_transcript444/f2p0/4551|transcript_HQ_SAB_transcript9420/f2p0/2377|transcript_HQ_SAB_transcript11214/f4p0/2166|transcript_HQ_SAB_transcript195/f7p0/5128|transcript_HQ_BAB_transcript8030/f5p0/2794|transcript_HQ_BAB_transcript8313/f2p0/2794|transcript_HQ_BAB_transcript13059/f4p0/2211|transcript…	http://www.genome.jp/kegg-bin/show_pathway?ko04140/K08269%09red/K08342%09red/K07198%09red/K08331%09red/K08330%09red/K08333%09red/K08332%09red/K08334%09red/K08337%09red
Protein processing in endoplasmic reticulum	KEGG PATHWAY	ko04141	157	303	0.835425	0.926582	transcript_HQ_BAB_transcript7718/f4p0/2849|transcript_HQ_BAB_transcript6846/f2p0/2953|transcript_HQ_BAB_transcript12816/f2p0/2238|transcript_HQ_BAB_transcript9128/f2p0/2677|transcript_HQ_BAB_transcript13824/f4p0/2221|transcript_HQ_SAB_transcript1308/f2p0/3921|transcript_HQ_SAB_transcript9415/f5p0/2270|transcript_HQ_BAB_transcript9425/f2p0/2633|transcript_HQ_SAB_transcript9870/f3p0/2261|transcript…	http://www.genome.jp/kegg-bin/show_pathway?ko04141/K10601%09red/K10597%09red/K06689%09red/K10661%09red/K10666%09red/K08852%09red/K10636%09red/K01456%09red/K10085%09red/K09481%09red/K09487%09red/K03868%09red/K08653%09red/K10956%09red/K10950%09red/K10839%09red/K07151%09red/K05546%09red/K14003%09red/K01230%09red/K14006%09red/K14007%09red/K14004%09red/K14005%09red/K12666%09red/K12667%09red/K03347%09r…
Folate biosynthesis	KEGG PATHWAY	ko00790	5	13	0.837952	0.926582	transcript_HQ_SAB_transcript3163/f2p0/3255|transcript_HQ_SAB_transcript23550/f3p0/1397|transcript_HQ_SAB_transcript11208/f3p0/2210|transcript_HQ_BAB_transcript4957/f3p0/3297|transcript_HQ_BAB_transcript16488/f2p0/1863	http://www.genome.jp/kegg-bin/show_pathway?ko00790/K13950%09red/K01930%09red/K01307%09red
RNA transport	KEGG PATHWAY	ko03013	134	262	0.849399	0.930294	transcript_HQ_SAB_transcript33557/f2p0/341|transcript_HQ_SAB_transcript27749/f2p0/1086|transcript_HQ_SAB_transcript2046/f3p0/3556|transcript_HQ_SAB_transcript2281/f2p0/3467|transcript_HQ_BAB_transcript11791/f2p0/2406|transcript_HQ_BAB_transcript4308/f2p0/3405|transcript_HQ_BAB_transcript16811/f4p0/1820|transcript_HQ_BAB_transcript17159/f3p0/1774|transcript_HQ_BAB_transcript13684/f2p0/2152|transcr…	http://www.genome.jp/kegg-bin/show_pathway?ko03013/K09291%09red/K03257%09red/K03246%09red/K10577%09red/K18213%09red/K12160%09red/K14301%09red/K03241%09red/K03242%09red/K14328%09red/K03262%09red/K14304%09red/K03260%09red/K14306%09red/K14309%09red/K14307%09red/K07936%09red/K14327%09red/K14326%09red/K14320%09red/K14324%09red/K07562%09red/K03253%09red/K12881%09red/K00784%09red/K03237%09red/K03680%09r…
Terpenoid backbone biosynthesis	KEGG PATHWAY	ko00900	49	103	0.864694	0.936006	transcript_HQ_BAB_transcript19045/f8p0/1485|transcript_HQ_SAB_transcript20455/f3p0/1690|transcript_HQ_BAB_transcript17933/f5p0/1664|transcript_HQ_SAB_transcript25467/f3p0/1258|transcript_HQ_SAB_transcript12054/f2p0/2126|transcript_HQ_SAB_transcript26523/f2p0/1178|transcript_HQ_SAB_transcript27297/f3p0/1121|transcript_HQ_SAB_transcript22879/f2p0/1437|transcript_HQ_SAB_transcript22098/f2p0/1494|tra…	http://www.genome.jp/kegg-bin/show_pathway?ko00900/K12742%09red/K06013%09red/K01662%09red/K10960%09red/K00099%09red/K03526%09red/K00869%09red/K01597%09red/K05356%09red/K03527%09red/K00787%09red/K13789%09red/K01770%09red/K01641%09red/K00021%09red/K00626%09red/K11778%09red
RNA polymerase	KEGG PATHWAY	ko03020	19	44	0.870893	0.936006	transcript_HQ_BAB_transcript359/f2p0/5030|transcript_HQ_SAB_transcript514/f2p0/4490|transcript_HQ_SAB_transcript32608/f2p0/513|transcript_HQ_SAB_transcript2616/f2p0/3361|transcript_HQ_SAB_transcript28612/f4p0/957|transcript_HQ_BAB_transcript14387/f2p0/2070|transcript_HQ_SAB_transcript31264/f2p0/753|transcript_HQ_SAB_transcript31141/f5p0/734|transcript_HQ_SAB_transcript227/f2p0/5009|transcript_HQ_…	http://www.genome.jp/kegg-bin/show_pathway?ko03020/K03014%09red/K03012%09red/K03006%09red/K03021%09red/K03005%09red/K03002%09red/K03010%09red/K03013%09red/K03027%09red/K03011%09red/K03018%09red/K03008%09red/K03009%09red
Cell cycle - Caulobacter	KEGG PATHWAY	ko04112	9	25	0.915511	0.97485	transcript_HQ_BAB_transcript16505/f2p0/1853|transcript_HQ_SAB_transcript23083/f4p0/1435|transcript_HQ_SAB_transcript24758/f2p0/1319|transcript_HQ_BAB_transcript20004/f2p0/1254|transcript_HQ_BAB_transcript17206/f3p0/1746|transcript_HQ_BAB_transcript16730/f3p0/1843|transcript_HQ_SAB_transcript2719/f3p0/3356|transcript_HQ_BAB_transcript14131/f3p0/2093|transcript_HQ_SAB_transcript22619/f3p0/1457	http://www.genome.jp/kegg-bin/show_pathway?ko04112/K01358%09red/K02563%09red/K01338%09red/K03531%09red
Purine metabolism	KEGG PATHWAY	ko00230	92	193	0.926533	0.977535	transcript_HQ_BAB_transcript359/f2p0/5030|transcript_HQ_SAB_transcript3614/f2p0/3154|transcript_HQ_SAB_transcript28586/f3p0/1022|transcript_HQ_SAB_transcript21735/f8p0/1467|transcript_HQ_SAB_transcript31141/f5p0/734|transcript_HQ_SAB_transcript7908/f2p0/2512|transcript_HQ_SAB_transcript30636/f2p0/810|transcript_HQ_SAB_transcript11906/f2p0/2157|transcript_HQ_BAB_transcript16617/f3p0/1836|transcrip…	http://www.genome.jp/kegg-bin/show_pathway?ko00230/K00856%09red/K00764%09red/K00088%09red/K14977%09red/K03006%09red/K03021%09red/K00602%09red/K03002%09red/K01939%09red/K00939%09red/K03027%09red/K00873%09red/K02335%09red/K18151%09red/K03008%09red/K03009%09red/K03787%09red/K01835%09red/K01952%09red/K01490%09red/K01756%09red/K00962%09red/K02320%09red/K13811%09red/K00948%09red/K03011%09red/K03010%09r…
Ubiquinone and other terpenoid-quinone biosynthesis	KEGG PATHWAY	ko00130	16	42	0.93577	0.978305	transcript_HQ_BAB_transcript9479/f2p0/2708|transcript_HQ_SAB_transcript28861/f3p0/996|transcript_HQ_SAB_transcript14701/f3p0/1951|transcript_HQ_BAB_transcript15841/f3p0/2031|transcript_HQ_BAB_transcript19127/f2p0/1481|transcript_HQ_SAB_transcript19076/f8p0/1663|transcript_HQ_BAB_transcript17942/f4p0/1654|transcript_HQ_SAB_transcript17595/f3p0/1769|transcript_HQ_BAB_transcript18397/f5p0/1583|trans…	http://www.genome.jp/kegg-bin/show_pathway?ko00130/K14760%09red/K05928%09red/K06125%09red/K12502%09red/K09834%09red/K01904%09red/K09833%09red/K03809%09red/K00487%09red/K00815%09red
Basal transcription factors	KEGG PATHWAY	ko03022	18	49	0.959545	0.978844	transcript_HQ_BAB_transcript6132/f5p0/3060|transcript_HQ_BAB_transcript17016/f2p0/1801|transcript_HQ_SAB_transcript4788/f2p0/2922|transcript_HQ_SAB_transcript5281/f2p0/2850|transcript_HQ_BAB_transcript18094/f2p0/1673|transcript_HQ_BAB_transcript16701/f3p0/1833|transcript_HQ_BAB_transcript5864/f4p0/3100|transcript_HQ_SAB_transcript4430/f2p0/2980|transcript_HQ_BAB_transcript17115/f2p0/1781|transcri…	http://www.genome.jp/kegg-bin/show_pathway?ko03022/K10843%09red/K03141%09red/K10844%09red/K03124%09red/K03137%09red/K03126%09red/K03130%09red/K03122%09red
Ribosome biogenesis in eukaryotes	KEGG PATHWAY	ko03008	38	92	0.96137	0.978844	transcript_HQ_BAB_transcript5662/f2p0/3151|transcript_HQ_SAB_transcript1916/f2p0/3591|transcript_HQ_SAB_transcript25539/f7p0/1246|transcript_HQ_SAB_transcript9739/f2p0/2316|transcript_HQ_BAB_transcript10421/f3p0/2535|transcript_HQ_SAB_transcript3561/f2p0/3147|transcript_HQ_BAB_transcript17478/f3p0/1744|transcript_HQ_BAB_transcript13044/f2p0/2211|transcript_HQ_SAB_transcript1651/f2p0/3694|transcri…	http://www.genome.jp/kegg-bin/show_pathway?ko03008/K11108%09red/K11128%09red/K12619%09red/K14572%09red/K14573%09red/K07562%09red/K14559%09red/K14554%09red/K14553%09red/K07936%09red/K14538%09red/K14536%09red/K07178%09red/K03097%09red/K03115%09red/K14563%09red/K14565%09red/K14564%09red/K14569%09red/K14568%09red/K14546%09red/K11883%09red/K06943%09red/K14521%09red
Ubiquitin mediated proteolysis	KEGG PATHWAY	ko04120	72	161	0.96182	0.978844	transcript_HQ_BAB_transcript673/f2p0/4617|transcript_HQ_SAB_transcript29451/f4p0/918|transcript_HQ_SAB_transcript1057/f2p0/3988|transcript_HQ_BAB_transcript10841/f3p0/2474|transcript_HQ_SAB_transcript10456/f2p0/2251|transcript_HQ_SAB_transcript13011/f2p0/2057|transcript_HQ_SAB_transcript7094/f2p0/2613|transcript_HQ_BAB_transcript1595/f2p0/4086|transcript_HQ_BAB_transcript12779/f3p0/2236|transcrip…	http://www.genome.jp/kegg-bin/show_pathway?ko04120/K10583%09red/K10597%09red/K10590%09red/K10591%09red/K10592%09red/K10579%09red/K10576%09red/K10577%09red/K10598%09red/K10599%09red/K10601%09red/K10580%09red/K03868%09red/K06689%09red/K03350%09red/K03352%09red/K04706%09red/K10143%09red/K10581%09red/K10140%09red/K10144%09red/K03094%09red/K10589%09red/K10573%09red/K03178%09red/K03872%09red/K03347%09r…
Ribosome	KEGG PATHWAY	ko03010	90	224	0.998177	0.999105	transcript_HQ_SAB_transcript31108/f6p0/709|transcript_HQ_SAB_transcript26782/f4p0/1157|transcript_HQ_SAB_transcript33012/f4p0/423|transcript_HQ_BAB_transcript20016/f5p0/1187|transcript_HQ_BAB_transcript17814/f4p0/1696|transcript_HQ_SAB_transcript31688/f2p0/665|transcript_HQ_SAB_transcript32611/f2p0/466|transcript_HQ_BAB_transcript10740/f2p0/2505|transcript_HQ_SAB_transcript30849/f3p0/801|transcri…	http://www.genome.jp/kegg-bin/show_pathway?ko03010/K02871%09red/K02917%09red/K02893%09red/K02906%09red/K02925%09red/K02863%09red/K02930%09red/K02955%09red/K02918%09red/K02866%09red/K02865%09red/K02864%09red/K02884%09red/K02910%09red/K02881%09red/K02936%09red/K02914%09red/K02993%09red/K02991%09red/K02997%09red/K02996%09red/K02995%09red/K02975%09red/K02974%09red/K02977%09red/K02976%09red/K02888%09r…
Oxidative phosphorylation	KEGG PATHWAY	ko00190	66	178	0.999105	0.999105	transcript_HQ_BAB_transcript20084/f3p0/1216|transcript_HQ_BAB_transcript3722/f6p0/3519|transcript_HQ_SAB_transcript21868/f3p0/1512|transcript_HQ_SAB_transcript16228/f14p0/1794|transcript_HQ_BAB_transcript3709/f6p0/3492|transcript_HQ_SAB_transcript21600/f3p0/1516|transcript_HQ_SAB_transcript8560/f3p0/2444|transcript_HQ_SAB_transcript22099/f2p0/1489|transcript_HQ_BAB_transcript8047/f5p0/2797|transc…	http://www.genome.jp/kegg-bin/show_pathway?ko00190/K02113%09red/K02257%09red/K02115%09red/K01507%09red/K05582%09red/K02133%09red/K02132%09red/K02153%09red/K02134%09red/K02137%09red/K02136%09red/K02154%09red/K03943%09red/K03945%09red/K02152%09red/K02151%09red/K02150%09red/K02108%09red/K01535%09red/K02144%09red/K02145%09red/K02146%09red/K02147%09red/K02149%09red/K02155%09red/K00413%09red/K03953%09r…
