# Supplementary material for: Characterization of the gene expression profile response to drought stress in Haloxylon using PacBio single-molecule real-time and Illumina sequencing
Source: Front Plant Sci. 2022 Aug 16;13:981029. doi: 10.3389/fpls.2022.981029 (PMC9424927; doi:10.3389/fpls.2022.981029)
Supplement: Supplementary file 3 [file Table_3.XLSX]

## Sheet: LB vs. HB_DEG_GO_term
GO classification of H. persicum
GO_accession	Description	Term_type	Over_represented_pValue	Corrected_pValue	DEG_item	DEG_list	Bg_item	Bg_list	Gene_names
GO:0016301	kinase activity	molecular_function	3.9121e-06	0.014377	1061	11234	1359	15445	transcript_HQ_SAB_transcript9582/f3p0/2331,transcript_HQ_SAB_transcript3678/f4p0/3122,transcript_HQ_SAB_transcript15344/f3p0/1902,transcript_HQ_SAB_transcript4056/f3p0/3132,transcript_HQ_BAB_transcript5603/f2p0/3209,transcript_HQ_BAB_transcript18565/f4p0/1538,transcript_HQ_BAB_transcript8371/f3p0/2770,transcript_HQ_SAB_transcript5864/f2p0/2762,transcript_HQ_BAB_transcript7894/f5p0/2826,transcript…
GO:0004672	protein kinase activity	molecular_function	2.0764e-05	0.038154	839	11234	1070	15445	transcript_HQ_SAB_transcript10646/f3p0/2245,transcript_HQ_SAB_transcript5636/f3p0/2790,transcript_HQ_BAB_transcript12452/f4p0/2266,transcript_HQ_BAB_transcript2482/f4p0/3822,transcript_HQ_BAB_transcript14571/f4p0/2053,transcript_HQ_BAB_transcript6380/f2p0/3039,transcript_HQ_SAB_transcript2359/f3p0/3417,transcript_HQ_BAB_transcript6325/f5p0/3046,transcript_HQ_SAB_transcript1387/f2p0/3742,transcrip…
GO:0048037	cofactor binding	molecular_function	4.216e-05	0.040023	553	11234	698	15445	transcript_HQ_BAB_transcript7283/f2p0/2906,transcript_HQ_SAB_transcript8331/f2p0/2487,transcript_HQ_SAB_transcript29039/f4p0/945,transcript_HQ_BAB_transcript4915/f3p0/3313,transcript_HQ_BAB_transcript5151/f2p0/3258,transcript_HQ_SAB_transcript4208/f3p0/3016,transcript_HQ_SAB_transcript22001/f2p0/1489,transcript_HQ_BAB_transcript13552/f2p0/2164,transcript_HQ_SAB_transcript23243/f3p0/1404,transcrip…
GO:0016773	phosphotransferase activity, alcohol group as acceptor	molecular_function	4.3562e-05	0.040023	966	11234	1242	15445	transcript_HQ_BAB_transcript12261/f2p0/2301,transcript_HQ_SAB_transcript8144/f2p0/2492,transcript_HQ_BAB_transcript3562/f2p0/3548,transcript_HQ_BAB_transcript13547/f4p0/2129,transcript_HQ_BAB_transcript18329/f2p0/1605,transcript_HQ_BAB_transcript8967/f3p0/2713,transcript_HQ_SAB_transcript8430/f2p0/2457,transcript_HQ_BAB_transcript3060/f3p0/3623,transcript_HQ_BAB_transcript1521/f2p0/4127,transcrip…
GO:0006468	protein phosphorylation	biological_process	0.00010119	0.074075	782	11234	1001	15445	transcript_HQ_SAB_transcript3019/f3p0/3263,transcript_HQ_SAB_transcript1501/f4p0/3764,transcript_HQ_SAB_transcript1095/f2p0/3967,transcript_HQ_BAB_transcript10642/f6p0/2463,transcript_HQ_SAB_transcript2624/f2p0/3392,transcript_HQ_SAB_transcript15483/f2p0/1891,transcript_HQ_SAB_transcript10174/f2p0/2317,transcript_HQ_BAB_transcript1281/f2p0/4253,transcript_HQ_BAB_transcript3899/f2p0/3482,transcrip…
GO:0016310	phosphorylation	biological_process	0.00012094	0.074075	864	11234	1111	15445	transcript_HQ_BAB_transcript20198/f2p0/1165,transcript_HQ_BAB_transcript15639/f2p0/1953,transcript_HQ_SAB_transcript1825/f8p0/3491,transcript_HQ_SAB_transcript10265/f5p0/2252,transcript_HQ_SAB_transcript1324/f2p0/3879,transcript_HQ_SAB_transcript10040/f2p0/2346,transcript_HQ_BAB_transcript4745/f3p0/3314,transcript_HQ_BAB_transcript17327/f2p0/1752,transcript_HQ_SAB_transcript6188/f2p0/2703,transcr…
GO:0050662	coenzyme binding	molecular_function	0.00044159	0.20374	448	11234	568	15445	transcript_HQ_SAB_transcript3472/f5p0/3152,transcript_HQ_BAB_transcript3221/f2p0/3617,transcript_LQ_SAB_transcript21476/f2p0/1569,transcript_HQ_BAB_transcript12758/f2p0/2270,transcript_HQ_BAB_transcript17957/f2p0/1692,transcript_HQ_SAB_transcript12435/f6p0/2089,transcript_HQ_BAB_transcript18465/f2p0/1624,transcript_HQ_BAB_transcript8095/f2p0/2805,transcript_HQ_SAB_transcript18680/f2p0/1700,transc…
GO:0030246	carbohydrate binding	molecular_function	0.00044351	0.20374	80	11234	91	15445	transcript_HQ_BAB_transcript9341/f2p0/2664,transcript_HQ_BAB_transcript7728/f4p0/2830,transcript_HQ_BAB_transcript10859/f2p0/2489,transcript_HQ_SAB_transcript2821/f2p0/3335,transcript_HQ_BAB_transcript5201/f3p0/3284,transcript_HQ_BAB_transcript4376/f6p0/3400,transcript_HQ_SAB_transcript7351/f2p0/2575,transcript_HQ_SAB_transcript8430/f2p0/2457,transcript_HQ_BAB_transcript20176/f6p0/1166,transcript…
GO:0003824	catalytic activity	molecular_function	0.00081741	0.33378	5696	11234	7700	15445	transcript_HQ_SAB_transcript10132/f3p0/2293,transcript_HQ_BAB_transcript1575/f3p0/4123,transcript_HQ_SAB_transcript1505/f2p0/3758,transcript_HQ_BAB_transcript3607/f3p0/3539,transcript_HQ_BAB_transcript6603/f4p0/3000,transcript_HQ_SAB_transcript10221/f2p0/2288,transcript_HQ_SAB_transcript9147/f4p0/2376,transcript_HQ_BAB_transcript1759/f2p0/4033,transcript_HQ_SAB_transcript22317/f4p0/1450,transcrip…
GO:0004866	endopeptidase inhibitor activity	molecular_function	0.0011307	0.37776	49	11234	55	15445	transcript_HQ_SAB_transcript27735/f2p0/1079,transcript_HQ_BAB_transcript20625/f2p0/427,transcript_HQ_SAB_transcript28502/f2p0/1009,transcript_HQ_SAB_transcript28845/f2p0/982,transcript_HQ_SAB_transcript26488/f3p0/1184,transcript_HQ_SAB_transcript30451/f2p0/836,transcript_HQ_SAB_transcript20018/f3p0/1626,transcript_HQ_BAB_transcript20485/f4p0/914,transcript_HQ_SAB_transcript13775/f3p0/2023,transcr…
GO:0061135	endopeptidase regulator activity	molecular_function	0.0011307	0.37776	49	11234	55	15445	transcript_HQ_SAB_transcript14836/f3p0/1952,transcript_HQ_SAB_transcript32366/f3p0/564,transcript_HQ_BAB_transcript20302/f2p0/1088,transcript_HQ_BAB_transcript20617/f2p0/573,transcript_HQ_SAB_transcript27840/f2p0/1077,transcript_HQ_SAB_transcript29575/f3p0/915,transcript_HQ_SAB_transcript29919/f2p0/885,transcript_HQ_BAB_transcript19315/f2p0/1451,transcript_HQ_SAB_transcript27703/f7p0/1041,transcr…
GO:0005578	proteinaceous extracellular matrix	cellular_component	0.0016759	0.45035	67	11234	77	15445	transcript_HQ_SAB_transcript18644/f3p0/1731,transcript_HQ_BAB_transcript19580/f3p0/1381,transcript_HQ_SAB_transcript28698/f4p0/991,transcript_HQ_SAB_transcript27369/f3p0/1045,transcript_HQ_BAB_transcript9376/f3p0/2645,transcript_HQ_BAB_transcript11798/f2p0/2351,transcript_HQ_SAB_transcript12155/f2p0/2111,transcript_HQ_SAB_transcript15737/f3p0/1907,transcript_HQ_SAB_transcript28712/f2p0/988,transc…
GO:0031012	extracellular matrix	cellular_component	0.0016759	0.45035	67	11234	77	15445	transcript_HQ_BAB_transcript12877/f2p0/2275,transcript_HQ_SAB_transcript26223/f4p0/1207,transcript_HQ_BAB_transcript8712/f2p0/2752,transcript_HQ_BAB_transcript15375/f4p0/1967,transcript_HQ_SAB_transcript26316/f2p0/1215,transcript_HQ_SAB_transcript19706/f9p0/1630,transcript_HQ_BAB_transcript6024/f2p0/3115,transcript_HQ_SAB_transcript15737/f3p0/1907,transcript_HQ_SAB_transcript28712/f2p0/988,transc…
GO:0005509	calcium ion binding	molecular_function	0.0017156	0.45035	180	11234	222	15445	transcript_HQ_SAB_transcript24996/f3p0/1290,transcript_HQ_SAB_transcript8384/f4p0/2436,transcript_HQ_SAB_transcript28234/f6p0/1030,transcript_HQ_SAB_transcript377/f2p0/4650,transcript_HQ_SAB_transcript23325/f2p0/1416,transcript_HQ_BAB_transcript9988/f2p0/2566,transcript_HQ_SAB_transcript29533/f2p0/948,transcript_HQ_BAB_transcript3527/f2p0/3545,transcript_HQ_SAB_transcript20320/f3p0/1595,transcrip…
GO:0007154	cell communication	biological_process	0.0022973	0.47856	534	11234	690	15445	transcript_HQ_SAB_transcript8737/f2p0/2418,transcript_HQ_SAB_transcript24351/f2p0/1343,transcript_HQ_BAB_transcript615/f2p0/4684,transcript_HQ_BAB_transcript10391/f2p0/2522,transcript_HQ_SAB_transcript14475/f4p0/1936,transcript_HQ_SAB_transcript18613/f3p0/1783,transcript_HQ_BAB_transcript2901/f2p0/3695,transcript_HQ_SAB_transcript5177/f4p0/2814,transcript_HQ_SAB_transcript5127/f4p0/2858,transcrip…
GO:0016740	transferase activity	molecular_function	0.0023535	0.47856	2313	11234	3085	15445	transcript_HQ_BAB_transcript7378/f2p0/2880,transcript_HQ_SAB_transcript11822/f2p0/2146,transcript_HQ_SAB_transcript20829/f17p0/1523,transcript_HQ_SAB_transcript10738/f4p0/2228,transcript_HQ_SAB_transcript16581/f2p0/1833,transcript_HQ_SAB_transcript3532/f2p0/3176,transcript_HQ_SAB_transcript29329/f7p0/934,transcript_HQ_BAB_transcript6332/f4p0/3024,transcript_HQ_BAB_transcript10042/f2p0/2556,transc…
GO:0016615	malate dehydrogenase activity	molecular_function	0.002387	0.47856	26	11234	27	15445	transcript_HQ_SAB_transcript8099/f4p0/2446,transcript_HQ_SAB_transcript8808/f3p0/2411,transcript_HQ_SAB_transcript8331/f2p0/2487,transcript_HQ_SAB_transcript10280/f3p0/2274,transcript_HQ_SAB_transcript9569/f2p0/2293,transcript_HQ_BAB_transcript795/f2p0/4531,transcript_HQ_BAB_transcript12640/f2p0/2336,transcript_HQ_SAB_transcript7669/f2p0/2475,transcript_HQ_BAB_transcript9508/f4p0/2631,transcript_…
GO:0008287	protein serine/threonine phosphatase complex	cellular_component	0.0024998	0.47856	31	11234	33	15445	transcript_HQ_BAB_transcript18618/f2p0/1577,transcript_HQ_BAB_transcript3384/f2p0/3577,transcript_HQ_BAB_transcript2281/f5p0/3855,transcript_HQ_SAB_transcript23593/f2p0/1394,transcript_HQ_SAB_transcript6765/f5p0/2620,transcript_HQ_SAB_transcript4452/f2p0/2978,transcript_HQ_SAB_transcript14334/f7p0/1921,transcript_HQ_SAB_transcript11464/f3p0/2311,transcript_HQ_BAB_transcript7525/f2p0/2891,transcri…
GO:1903293	phosphatase complex	cellular_component	0.0024998	0.47856	31	11234	33	15445	transcript_HQ_BAB_transcript12411/f3p0/2280,transcript_HQ_SAB_transcript2733/f3p0/3380,transcript_HQ_BAB_transcript8005/f4p0/2780,transcript_HQ_BAB_transcript9936/f2p0/2573,transcript_HQ_SAB_transcript1353/f3p0/3836,transcript_HQ_BAB_transcript19764/f2p0/1341,transcript_HQ_BAB_transcript2720/f2p0/3781,transcript_HQ_BAB_transcript9933/f2p0/2579,transcript_HQ_SAB_transcript22373/f2p0/1483,transcrip…
GO:0016491	oxidoreductase activity	molecular_function	0.0028183	0.47856	1135	11234	1499	15445	transcript_HQ_SAB_transcript18895/f3p0/1700,transcript_HQ_BAB_transcript7068/f3p0/2941,transcript_HQ_SAB_transcript26169/f2p0/1203,transcript_HQ_SAB_transcript27384/f5p0/1073,transcript_HQ_SAB_transcript3603/f7p0/3033,transcript_HQ_BAB_transcript9609/f6p0/2572,transcript_HQ_SAB_transcript18020/f5p0/1675,transcript_HQ_SAB_transcript26672/f3p0/1165,transcript_HQ_BAB_transcript17874/f4p0/1665,transc…
GO:0030414	peptidase inhibitor activity	molecular_function	0.0029987	0.47856	53	11234	61	15445	transcript_HQ_SAB_transcript19914/f4p0/1626,transcript_HQ_BAB_transcript20485/f4p0/914,transcript_HQ_SAB_transcript13775/f3p0/2023,transcript_HQ_BAB_transcript18024/f2p0/1675,transcript_HQ_SAB_transcript29057/f4p0/967,transcript_HQ_SAB_transcript26754/f3p0/1163,transcript_HQ_SAB_transcript30096/f3p0/873,transcript_HQ_SAB_transcript19445/f2p0/1657,transcript_HQ_BAB_transcript20625/f2p0/427,transcr…
GO:0061134	peptidase regulator activity	molecular_function	0.0029987	0.47856	53	11234	61	15445	transcript_HQ_SAB_transcript14177/f2p0/1975,transcript_HQ_SAB_transcript20359/f2p0/1599,transcript_HQ_SAB_transcript24575/f4p0/1297,transcript_HQ_BAB_transcript16114/f2p0/1913,transcript_HQ_SAB_transcript15871/f2p0/1862,transcript_HQ_BAB_transcript19075/f2p0/1539,transcript_HQ_BAB_transcript674/f2p0/4633,transcript_HQ_SAB_transcript29664/f6p0/879,transcript_HQ_SAB_transcript29044/f2p0/973,transcr…
GO:0004470	malic enzyme activity	molecular_function	0.0031524	0.47856	25	11234	26	15445	transcript_HQ_BAB_transcript9030/f4p0/2685,transcript_HQ_SAB_transcript10512/f2p0/2255,transcript_HQ_BAB_transcript10796/f2p0/2478,transcript_HQ_SAB_transcript9134/f3p0/2392,transcript_HQ_BAB_transcript15597/f3p0/1974,transcript_HQ_SAB_transcript10410/f2p0/2299,transcript_HQ_BAB_transcript13214/f3p0/2217,transcript_HQ_BAB_transcript12792/f7p0/2206,transcript_HQ_SAB_transcript9191/f2p0/2371,transc…
GO:0004471	malate dehydrogenase (decarboxylating) (NAD+) activity	molecular_function	0.0031524	0.47856	25	11234	26	15445	transcript_HQ_BAB_transcript795/f2p0/4531,transcript_HQ_SAB_transcript9569/f2p0/2293,transcript_HQ_SAB_transcript10280/f3p0/2274,transcript_HQ_SAB_transcript8808/f3p0/2411,transcript_HQ_SAB_transcript8331/f2p0/2487,transcript_HQ_SAB_transcript8099/f4p0/2446,transcript_HQ_SAB_transcript8004/f2p0/2522,transcript_HQ_BAB_transcript9508/f4p0/2631,transcript_HQ_SAB_transcript7669/f2p0/2475,transcript_H…
GO:0043412	macromolecule modification	biological_process	0.0032555	0.47856	1266	11234	1670	15445	transcript_HQ_BAB_transcript7649/f2p0/2850,transcript_HQ_SAB_transcript15923/f4p0/1832,transcript_HQ_BAB_transcript2929/f3p0/3721,transcript_HQ_BAB_transcript1616/f5p0/4134,transcript_HQ_SAB_transcript17657/f4p0/1757,transcript_HQ_SAB_transcript11513/f2p0/2167,transcript_HQ_BAB_transcript6877/f3p0/2982,transcript_HQ_BAB_transcript11869/f2p0/2346,transcript_HQ_SAB_transcript611/f2p0/4323,transcrip…

## Sheet: LB vs. HB_DEG_KEGG_pathway
KEGG enrichment analysis of H. persicum
Term	Database	ID	Input number	Background number	P-Value	Corrected P-Value	Input	Hyperlink
Carbon fixation in photosynthetic organisms	KEGG PATHWAY	ko00710	140	167	0.112742	0.879595	transcript_HQ_SAB_transcript15098/f2p0/1894|transcript_HQ_SAB_transcript8504/f3p0/2459|transcript_HQ_BAB_transcript12640/f2p0/2336|transcript_HQ_SAB_transcript9569/f2p0/2293|transcript_HQ_SAB_transcript11762/f4p0/2071|transcript_HQ_BAB_transcript15491/f2p0/1979|transcript_HQ_BAB_transcript19447/f2p0/1416|transcript_HQ_BAB_transcript17693/f3p0/1772|transcript_HQ_BAB_transcript8870/f4p0/2734|transc…	http://www.genome.jp/kegg-bin/show_pathway?ko00710/K00855%09red/K00615%09red/K01623%09red/K01602%09red/K03841%09red/K00134%09red/K14455%09red/K14454%09red/K00051%09red/K05298%09red/K00029%09red/K01006%09red/K01100%09red/K01595%09red/K01610%09red/K00927%09red/K01803%09red/K01807%09red/K14272%09red/K01783%09red/K00028%09red/K00025%09red/K00814%09red/K00026%09red
Plant-pathogen interaction	KEGG PATHWAY	ko04626	157	192	0.143128	0.879595	transcript_HQ_SAB_transcript1491/f2p0/3794|transcript_HQ_BAB_transcript7718/f4p0/2849|transcript_HQ_SAB_transcript2536/f2p0/3406|transcript_HQ_SAB_transcript7620/f3p0/2552|transcript_HQ_BAB_transcript6089/f3p0/3080|transcript_HQ_BAB_transcript11798/f2p0/2351|transcript_HQ_BAB_transcript11444/f2p0/2384|transcript_HQ_BAB_transcript6078/f3p0/3095|transcript_HQ_BAB_transcript20198/f2p0/1165|transcrip…	http://www.genome.jp/kegg-bin/show_pathway?ko04626/K13414%09red/K13416%09red/K09487%09red/K13457%09red/K13412%09red/K13413%09red/K18875%09red/K13448%09red/K12795%09red/K13429%09red/K05391%09red/K18834%09red/K13456%09red/K04079%09red/K13447%09red/K13459%09red/K13430%09red/K13436%09red/K13424%09red/K02183%09red
Glyoxylate and dicarboxylate metabolism	KEGG PATHWAY	ko00630	89	106	0.171634	0.879595	transcript_HQ_SAB_transcript15098/f2p0/1894|transcript_HQ_BAB_transcript146/f68p0/5467|transcript_HQ_SAB_transcript27356/f3p0/1115|transcript_HQ_SAB_transcript13877/f3p0/2026|transcript_HQ_SAB_transcript24459/f3p0/1347|transcript_HQ_BAB_transcript19161/f2p0/1474|transcript_HQ_BAB_transcript18866/f2p0/1554|transcript_HQ_SAB_transcript21692/f2p0/1539|transcript_HQ_BAB_transcript3248/f9p0/3622|trans…	http://www.genome.jp/kegg-bin/show_pathway?ko00630/K15919%09red/K11517%09red/K01681%09red/K00600%09red/K01602%09red/K00830%09red/K01915%09red/K19269%09red/K01647%09red/K03781%09red/K00284%09red/K00281%09red/K00626%09red/K14272%09red/K01638%09red/K01637%09red/K01455%09red/K15893%09red/K18121%09red/K00382%09red/K00025%09red/K00605%09red/K00122%09red/K00026%09red
Glycerophospholipid metabolism	KEGG PATHWAY	ko00564	112	137	0.18996	0.879595	transcript_HQ_BAB_transcript19117/f2p0/1488|transcript_HQ_BAB_transcript12090/f2p0/2328|transcript_HQ_SAB_transcript4725/f2p0/2925|transcript_HQ_BAB_transcript19259/f3p0/1483|transcript_HQ_SAB_transcript11558/f3p0/2172|transcript_HQ_BAB_transcript6484/f13p0/2942|transcript_HQ_SAB_transcript14520/f2p0/1966|transcript_HQ_BAB_transcript9398/f2p0/2639|transcript_HQ_SAB_transcript25716/f4p0/1251|trans…	http://www.genome.jp/kegg-bin/show_pathway?ko00564/K00894%09red/K01114%09red/K01115%09red/K15728%09red/K01126%09red/K13511%09red/K14674%09red/K13513%09red/K00967%09red/K00993%09red/K01613%09red/K00901%09red/K00630%09red/K00006%09red/K01094%09red/K05929%09red/K13523%09red/K06130%09red/K16860%09red/K13508%09red/K14156%09red/K13506%09red
Cysteine and methionine metabolism	KEGG PATHWAY	ko00270	118	145	0.192444	0.879595	transcript_HQ_SAB_transcript7245/f2p0/2615|transcript_HQ_SAB_transcript23540/f2p0/1417|transcript_HQ_SAB_transcript26789/f3p0/1159|transcript_HQ_BAB_transcript13284/f10p0/2158|transcript_HQ_SAB_transcript20034/f2p0/1626|transcript_HQ_SAB_transcript21180/f2p0/1538|transcript_HQ_SAB_transcript19638/f2p0/1650|transcript_HQ_BAB_transcript17472/f2p0/1735|transcript_HQ_SAB_transcript21692/f2p0/1539|tra…	http://www.genome.jp/kegg-bin/show_pathway?ko00270/K00899%09red/K01244%09red/K16054%09red/K01011%09red/K00811%09red/K00815%09red/K01761%09red/K01919%09red/K05933%09red/K14455%09red/K14454%09red/K00640%09red/K00547%09red/K12524%09red/K00789%09red/K01739%09red/K00016%09red/K00549%09red/K08967%09red/K01251%09red/K08963%09red/K00025%09red/K00827%09red/K00826%09red/K01611%09red/K00928%09red/K01738%09r…
Ether lipid metabolism	KEGG PATHWAY	ko00565	47	54	0.207559	0.879595	transcript_HQ_BAB_transcript5748/f2p0/3187|transcript_HQ_BAB_transcript5007/f2p0/3293|transcript_HQ_SAB_transcript4303/f4p0/2984|transcript_HQ_BAB_transcript12090/f2p0/2328|transcript_HQ_SAB_transcript4725/f2p0/2925|transcript_HQ_SAB_transcript15794/f2p0/1886|transcript_HQ_BAB_transcript18055/f2p0/1659|transcript_HQ_SAB_transcript2924/f2p0/3302|transcript_HQ_SAB_transcript2614/f4p0/3360|transcrip…	http://www.genome.jp/kegg-bin/show_pathway?ko00565/K14674%09red/K16860%09red/K00993%09red/K01114%09red/K01115%09red
Tyrosine metabolism	KEGG PATHWAY	ko00350	50	58	0.212052	0.879595	transcript_HQ_SAB_transcript23010/f2p0/1442|transcript_HQ_SAB_transcript22045/f2p0/1496|transcript_HQ_SAB_transcript23560/f2p0/1401|transcript_HQ_SAB_transcript21191/f2p0/1545|transcript_HQ_SAB_transcript15795/f9p0/1859|transcript_HQ_SAB_transcript27374/f2p0/1106|transcript_HQ_SAB_transcript17431/f2p0/1777|transcript_HQ_BAB_transcript17694/f4p0/1693|transcript_HQ_BAB_transcript20388/f2p0/1066|tra…	http://www.genome.jp/kegg-bin/show_pathway?ko00350/K00276%09red/K14455%09red/K14454%09red/K00001%09red/K00451%09red/K01800%09red/K00457%09red/K15849%09red/K18857%09red/K00811%09red/K01592%09red/K01557%09red/K01555%09red/K00121%09red/K00422%09red/K00817%09red/K00815%09red
Glycine, serine and threonine metabolism	KEGG PATHWAY	ko00260	78	96	0.251673	0.879595	transcript_HQ_BAB_transcript11935/f5p0/2343|transcript_HQ_BAB_transcript12325/f3p0/2384|transcript_HQ_BAB_transcript16915/f5p0/1816|transcript_HQ_SAB_transcript2222/f2p0/3503|transcript_HQ_SAB_transcript15098/f2p0/1894|transcript_HQ_BAB_transcript17977/f3p0/1614|transcript_HQ_BAB_transcript18476/f3p0/1615|transcript_HQ_SAB_transcript24794/f9p0/1249|transcript_HQ_SAB_transcript9459/f3p0/2354|trans…	http://www.genome.jp/kegg-bin/show_pathway?ko00260/K01079%09red/K15919%09red/K00831%09red/K01620%09red/K00600%09red/K00605%09red/K00830%09red/K14085%09red/K00872%09red/K00058%09red/K00130%09red/K01834%09red/K00281%09red/K12524%09red/K01754%09red/K01695%09red/K01696%09red/K00827%09red/K14272%09red/K00499%09red/K00928%09red/K15893%09red/K00276%09red/K00382%09red/K15634%09red/K15633%09red
Sesquiterpenoid and triterpenoid biosynthesis	KEGG PATHWAY	ko00909	22	24	0.258477	0.879595	transcript_HQ_SAB_transcript12806/f10p0/2023|transcript_HQ_BAB_transcript13499/f22p0/2122|transcript_HQ_SAB_transcript12264/f2p0/2089|transcript_HQ_BAB_transcript4125/f3p0/3456|transcript_HQ_SAB_transcript12898/f35p0/2032|transcript_HQ_BAB_transcript16007/f4p0/1899|transcript_HQ_SAB_transcript12572/f2p0/2077|transcript_HQ_BAB_transcript9221/f2p0/2687|transcript_HQ_SAB_transcript3864/f3p0/3086|tra…	http://www.genome.jp/kegg-bin/show_pathway?ko00909/K00511%09red/K15813%09red/K15803%09red/K00801%09red
Phenylalanine metabolism	KEGG PATHWAY	ko00360	48	58	0.281165	0.879595	transcript_HQ_SAB_transcript23010/f2p0/1442|transcript_HQ_SAB_transcript20629/f5p0/1578|transcript_HQ_SAB_transcript15346/f6p0/1876|transcript_HQ_SAB_transcript7089/f182p0/2543|transcript_HQ_SAB_transcript12864/f2p0/2052|transcript_HQ_SAB_transcript23496/f2p0/1398|transcript_HQ_SAB_transcript21094/f2p0/1555|transcript_HQ_SAB_transcript16191/f2p0/1874|transcript_HQ_BAB_transcript18020/f2p0/1652|tr…	http://www.genome.jp/kegg-bin/show_pathway?ko00360/K00276%09red/K14455%09red/K10775%09red/K00487%09red/K00817%09red/K15849%09red/K00811%09red/K00815%09red/K00457%09red/K00588%09red/K01426%09red/K01904%09red/K14454%09red
Peroxisome	KEGG PATHWAY	ko04146	88	111	0.290325	0.879595	transcript_HQ_SAB_transcript18604/f2p0/1714|transcript_HQ_SAB_transcript4088/f2p0/3083|transcript_HQ_SAB_transcript25449/f2p0/1267|transcript_HQ_BAB_transcript14072/f2p0/2109|transcript_HQ_BAB_transcript18620/f2p0/1592|transcript_HQ_SAB_transcript22542/f2p0/1458|transcript_HQ_SAB_transcript26582/f3p0/1183|transcript_HQ_BAB_transcript13482/f2p0/2257|transcript_HQ_SAB_transcript19270/f8p0/1670|tran…	http://www.genome.jp/kegg-bin/show_pathway?ko04146/K11517%09red/K00830%09red/K11147%09red/K03781%09red/K13348%09red/K04564%09red/K04565%09red/K13237%09red/K01897%09red/K13342%09red/K13343%09red/K13344%09red/K13345%09red/K13347%09red/K00031%09red/K12663%09red/K12261%09red/K13354%09red/K06664%09red/K13337%09red/K13339%09red/K00477%09red/K00232%09red/K03426%09red/K07513%09red
Pyruvate metabolism	KEGG PATHWAY	ko00620	141	182	0.297292	0.879595	transcript_HQ_BAB_transcript2892/f2p0/3693|transcript_HQ_BAB_transcript12640/f2p0/2336|transcript_HQ_SAB_transcript13984/f3p0/1985|transcript_HQ_BAB_transcript19985/f2p0/1255|transcript_HQ_SAB_transcript10040/f2p0/2346|transcript_HQ_SAB_transcript11906/f2p0/2157|transcript_HQ_SAB_transcript11762/f4p0/2071|transcript_HQ_BAB_transcript2690/f5p0/3738|transcript_HQ_SAB_transcript11211/f3p0/2195|trans…	http://www.genome.jp/kegg-bin/show_pathway?ko00620/K01649%09red/K14085%09red/K00873%09red/K11262%09red/K00627%09red/K00626%09red/K00051%09red/K01895%09red/K00016%09red/K01069%09red/K01006%09red/K01679%09red/K01512%09red/K01759%09red/K01595%09red/K01610%09red/K02160%09red/K01638%09red/K00161%09red/K00162%09red/K00128%09red/K00029%09red/K00028%09red/K00382%09red/K00025%09red/K00026%09red/K00102%09r…
Flavonoid biosynthesis	KEGG PATHWAY	ko00941	22	25	0.302285	0.879595	transcript_HQ_SAB_transcript20310/f3p0/1610|transcript_HQ_BAB_transcript16394/f5p0/1854|transcript_HQ_SAB_transcript16584/f2p0/1832|transcript_HQ_SAB_transcript27726/f3p0/1087|transcript_HQ_SAB_transcript23605/f2p0/1393|transcript_HQ_SAB_transcript29438/f2p0/929|transcript_HQ_BAB_transcript17324/f2p0/1770|transcript_HQ_SAB_transcript16079/f6p0/1837|transcript_HQ_BAB_transcript20137/f7p0/1187|tran…	http://www.genome.jp/kegg-bin/show_pathway?ko00941/K08695%09red/K01859%09red/K00475%09red/K00660%09red/K09754%09red/K00588%09red/K05278%09red/K00487%09red/K05280%09red
Alanine, aspartate and glutamate metabolism	KEGG PATHWAY	ko00250	58	72	0.306006	0.879595	transcript_HQ_SAB_transcript23010/f2p0/1442|transcript_HQ_SAB_transcript16056/f2p0/1854|transcript_HQ_SAB_transcript15098/f2p0/1894|transcript_HQ_BAB_transcript1344/f2p0/4208|transcript_HQ_BAB_transcript17/f4p0/6667|transcript_HQ_BAB_transcript18372/f45p0/1528|transcript_HQ_BAB_transcript18238/f2p0/1636|transcript_HQ_BAB_transcript19177/f2p0/1485|transcript_HQ_SAB_transcript27148/f2p0/1131|transc…	http://www.genome.jp/kegg-bin/show_pathway?ko00250/K00261%09red/K14454%09red/K14455%09red/K00764%09red/K17761%09red/K01956%09red/K00294%09red/K01955%09red/K00278%09red/K01940%09red/K01953%09red/K00811%09red/K00827%09red/K14272%09red/K00814%09red/K01580%09red/K00830%09red/K01915%09red/K00264%09red/K01756%09red/K01939%09red
Tropane, piperidine and pyridine alkaloid biosynthesis	KEGG PATHWAY	ko00960	32	38	0.307105	0.879595	transcript_HQ_SAB_transcript23010/f2p0/1442|transcript_HQ_SAB_transcript16191/f2p0/1874|transcript_HQ_SAB_transcript27030/f7p0/1128|transcript_HQ_SAB_transcript2699/f2p0/3359|transcript_HQ_SAB_transcript25294/f2p0/1269|transcript_HQ_BAB_transcript13701/f3p0/2125|transcript_HQ_SAB_transcript29039/f4p0/945|transcript_HQ_BAB_transcript15308/f2p0/2035|transcript_HQ_BAB_transcript7363/f3p0/2916|transc…	http://www.genome.jp/kegg-bin/show_pathway?ko00960/K00276%09red/K14455%09red/K14454%09red/K15849%09red/K00811%09red/K00815%09red/K08081%09red/K00817%09red
Isoquinoline alkaloid biosynthesis	KEGG PATHWAY	ko00950	32	38	0.307105	0.879595	transcript_HQ_SAB_transcript23010/f2p0/1442|transcript_HQ_SAB_transcript15795/f9p0/1859|transcript_HQ_BAB_transcript19625/f2p0/1382|transcript_HQ_SAB_transcript16191/f2p0/1874|transcript_HQ_BAB_transcript14462/f3p0/2069|transcript_HQ_SAB_transcript2699/f2p0/3359|transcript_HQ_SAB_transcript21676/f2p0/1531|transcript_HQ_SAB_transcript20520/f2p0/1623|transcript_HQ_BAB_transcript13701/f3p0/2125|tran…	http://www.genome.jp/kegg-bin/show_pathway?ko00950/K00276%09red/K14455%09red/K14454%09red/K15849%09red/K13384%09red/K00811%09red/K01592%09red/K00815%09red/K00422%09red
Plant hormone signal transduction	KEGG PATHWAY	ko04075	148	192	0.307675	0.879595	transcript_HQ_BAB_transcript15584/f2p0/1945|transcript_HQ_SAB_transcript15483/f2p0/1891|transcript_HQ_BAB_transcript9573/f5p0/2638|transcript_HQ_BAB_transcript6457/f6p0/2947|transcript_HQ_SAB_transcript1098/f2p0/3950|transcript_HQ_BAB_transcript9066/f2p0/2676|transcript_HQ_BAB_transcript4863/f9p0/3291|transcript_HQ_SAB_transcript5615/f6p0/2792|transcript_HQ_SAB_transcript17732/f2p0/1759|transcrip…	http://www.genome.jp/kegg-bin/show_pathway?ko04075/K14486%09red/K14487%09red/K14484%09red/K14485%09red/K14488%09red/K14489%09red/K13946%09red/K13415%09red/K13416%09red/K14432%09red/K14431%09red/K14510%09red/K14512%09red/K14513%09red/K14514%09red/K14515%09red/K14495%09red/K14494%09red/K14497%09red/K14496%09red/K14491%09red/K14493%09red/K14492%09red/K14499%09red/K14498%09red/K14506%09red/K14502%09r…
Stilbenoid, diarylheptanoid and gingerol biosynthesis	KEGG PATHWAY	ko00945	14	15	0.309536	0.879595	transcript_HQ_SAB_transcript28657/f2p0/1011|transcript_HQ_BAB_transcript20137/f7p0/1187|transcript_HQ_BAB_transcript13240/f2p0/2020|transcript_HQ_BAB_transcript16761/f2p0/1837|transcript_HQ_SAB_transcript25041/f5p0/1277|transcript_HQ_BAB_transcript17324/f2p0/1770|transcript_HQ_BAB_transcript17357/f5p0/1748|transcript_HQ_BAB_transcript6546/f4p0/3013|transcript_HQ_SAB_transcript17595/f3p0/1769|tran…	http://www.genome.jp/kegg-bin/show_pathway?ko00945/K09754%09red/K16040%09red/K00588%09red/K00487%09red/K00517%09red
Amino sugar and nucleotide sugar metabolism	KEGG PATHWAY	ko00520	122	158	0.323079	0.879595	transcript_HQ_SAB_transcript6141/f2p0/2723|transcript_HQ_BAB_transcript17787/f16p0/1688|transcript_HQ_SAB_transcript10104/f2p0/2288|transcript_HQ_SAB_transcript6237/f2p0/2735|transcript_HQ_SAB_transcript18955/f3p0/1679|transcript_HQ_SAB_transcript21845/f3p0/1432|transcript_HQ_SAB_transcript5283/f3p0/2850|transcript_HQ_SAB_transcript13668/f2p0/2008|transcript_HQ_BAB_transcript11339/f2p0/2429|trans…	http://www.genome.jp/kegg-bin/show_pathway?ko00520/K00975%09red/K05305%09red/K01810%09red/K12451%09red/K12450%09red/K01183%09red/K15920%09red/K01835%09red/K08679%09red/K01836%09red/K00012%09red/K17497%09red/K00966%09red/K00847%09red/K18677%09red/K00963%09red/K01711%09red/K12446%09red/K12447%09red/K12448%09red/K10046%09red/K06118%09red/K13648%09red/K08678%09red/K01784%09red/K13379%09red/K01209%09r…
Circadian rhythm - plant	KEGG PATHWAY	ko04712	71	90	0.326221	0.879595	transcript_HQ_SAB_transcript20310/f3p0/1610|transcript_HQ_BAB_transcript11714/f50p0/2234|transcript_HQ_SAB_transcript15413/f2p0/1888|transcript_HQ_SAB_transcript2652/f4p0/3292|transcript_HQ_SAB_transcript714/f2p0/4233|transcript_HQ_BAB_transcript8994/f5p0/2688|transcript_HQ_SAB_transcript4622/f4p0/2920|transcript_HQ_BAB_transcript5096/f3p0/3276|transcript_HQ_SAB_transcript3383/f2p0/3206|transcrip…	http://www.genome.jp/kegg-bin/show_pathway?ko04712/K10143%09red/K12118%09red/K12119%09red/K16240%09red/K00660%09red/K12116%09red/K12115%09red/K12121%09red/K12120%09red/K12127%09red/K03115%09red/K12133%09red/K12130%09red/K12129%09red/K12124%09red/K03097%09red/K12126%09red
Starch and sucrose metabolism	KEGG PATHWAY	ko00500	161	211	0.33278	0.879595	transcript_HQ_SAB_transcript10905/f5p0/2172|transcript_HQ_SAB_transcript6141/f2p0/2723|transcript_HQ_SAB_transcript11907/f2p0/2136|transcript_HQ_SAB_transcript14404/f2p0/1959|transcript_HQ_SAB_transcript6237/f2p0/2735|transcript_HQ_SAB_transcript18955/f3p0/1679|transcript_HQ_SAB_transcript6546/f2p0/2673|transcript_HQ_SAB_transcript13668/f2p0/2008|transcript_HQ_BAB_transcript11339/f2p0/2429|transc…	http://www.genome.jp/kegg-bin/show_pathway?ko00500/K00975%09red/K01177%09red/K16055%09red/K01810%09red/K00847%09red/K01187%09red/K01835%09red/K01188%09red/K00703%09red/K00705%09red/K00688%09red/K08678%09red/K00012%09red/K01087%09red/K19892%09red/K15920%09red/K00963%09red/K01193%09red/K13648%09red/K01194%09red/K00700%09red/K01051%09red/K08679%09red/K05349%09red/K00696%09red/K00844%09red/K00695%09r…
Fatty acid degradation	KEGG PATHWAY	ko00071	58	73	0.333292	0.879595	transcript_HQ_SAB_transcript22045/f2p0/1496|transcript_HQ_BAB_transcript15666/f2p0/1934|transcript_HQ_SAB_transcript21191/f2p0/1545|transcript_HQ_SAB_transcript13118/f3p0/2062|transcript_HQ_SAB_transcript5310/f3p0/2838|transcript_HQ_BAB_transcript8060/f2p0/2817|transcript_HQ_SAB_transcript13984/f3p0/1985|transcript_HQ_SAB_transcript4088/f2p0/3083|transcript_HQ_BAB_transcript6263/f2p0/3066|transcr…	http://www.genome.jp/kegg-bin/show_pathway?ko00071/K00001%09red/K18857%09red/K00128%09red/K00232%09red/K10527%09red/K14085%09red/K01897%09red/K00121%09red/K07513%09red/K00626%09red
Citrate cycle (TCA cycle)	KEGG PATHWAY	ko00020	70	89	0.334474	0.879595	transcript_HQ_BAB_transcript12325/f3p0/2384|transcript_HQ_SAB_transcript15965/f2p0/1885|transcript_HQ_SAB_transcript17372/f2p0/1780|transcript_HQ_SAB_transcript21868/f3p0/1512|transcript_HQ_SAB_transcript11155/f3p0/2203|transcript_HQ_SAB_transcript6541/f5p0/2661|transcript_HQ_SAB_transcript18895/f3p0/1700|transcript_HQ_SAB_transcript12142/f2p0/2149|transcript_HQ_SAB_transcript13877/f3p0/2026|tran…	http://www.genome.jp/kegg-bin/show_pathway?ko00020/K00235%09red/K01899%09red/K00658%09red/K00164%09red/K01679%09red/K00161%09red/K00162%09red/K01681%09red/K01900%09red/K01648%09red/K00234%09red/K01610%09red/K00236%09red/K00382%09red/K00025%09red/K00026%09red/K00627%09red/K01647%09red/K00030%09red/K00031%09red
Protein processing in endoplasmic reticulum	KEGG PATHWAY	ko04141	229	303	0.334779	0.879595	transcript_HQ_SAB_transcript6337/f3p0/2701|transcript_HQ_BAB_transcript7718/f4p0/2849|transcript_HQ_BAB_transcript6846/f2p0/2953|transcript_HQ_BAB_transcript1274/f3p0/4212|transcript_HQ_BAB_transcript13551/f3p0/2155|transcript_HQ_BAB_transcript13824/f4p0/2221|transcript_HQ_SAB_transcript29031/f3p0/966|transcript_HQ_BAB_transcript9425/f2p0/2633|transcript_HQ_SAB_transcript24429/f2p0/1338|transcrip…	http://www.genome.jp/kegg-bin/show_pathway?ko04141/K10601%09red/K10597%09red/K10578%09red/K13989%09red/K10661%09red/K10666%09red/K04554%09red/K08852%09red/K04523%09red/K10575%09red/K01456%09red/K07342%09red/K10085%09red/K13719%09red/K09517%09red/K14026%09red/K09487%09red/K09481%09red/K10956%09red/K10950%09red/K10839%09red/K07151%09red/K05546%09red/K08057%09red/K14003%09red/K10636%09red/K01230%09r…
Sulfur metabolism	KEGG PATHWAY	ko00920	36	44	0.335272	0.879595	transcript_HQ_BAB_transcript15546/f2p0/1964|transcript_HQ_BAB_transcript10643/f3p0/2476|transcript_HQ_SAB_transcript10136/f2p0/2302|transcript_HQ_BAB_transcript16466/f3p0/1865|transcript_HQ_BAB_transcript13020/f2p0/2237|transcript_HQ_SAB_transcript19884/f3p0/1622|transcript_HQ_BAB_transcript17639/f2p0/1717|transcript_HQ_SAB_transcript23540/f2p0/1417|transcript_HQ_SAB_transcript14876/f8p0/1865|tra…	http://www.genome.jp/kegg-bin/show_pathway?ko00920/K05907%09red/K00392%09red/K08738%09red/K01011%09red/K00640%09red/K13811%09red/K13034%09red/K01082%09red/K01738%09red/K01739%09red
Cyanoamino acid metabolism	KEGG PATHWAY	ko00460	36	44	0.335272	0.879595	transcript_HQ_SAB_transcript11907/f2p0/2136|transcript_HQ_SAB_transcript10333/f8p0/2228|transcript_HQ_SAB_transcript22732/f5p0/1427|transcript_HQ_SAB_transcript10905/f5p0/2172|transcript_HQ_SAB_transcript14823/f3p0/1932|transcript_HQ_BAB_transcript14718/f3p0/2070|transcript_HQ_SAB_transcript12187/f3p0/2136|transcript_HQ_SAB_transcript17413/f2p0/1775|transcript_HQ_BAB_transcript18233/f2p0/1634|tra…	http://www.genome.jp/kegg-bin/show_pathway?ko00460/K01188%09red/K18592%09red/K00600%09red/K05349%09red/K13034%09red/K13035%09red/K01455%09red
Taurine and hypotaurine metabolism	KEGG PATHWAY	ko00430	16	18	0.335718	0.879595	transcript_HQ_SAB_transcript26169/f2p0/1203|transcript_HQ_SAB_transcript10697/f13p0/2206|transcript_HQ_BAB_transcript1344/f2p0/4208|transcript_HQ_SAB_transcript3518/f6p0/3135|transcript_HQ_SAB_transcript26914/f2p0/1148|transcript_HQ_SAB_transcript14682/f16p0/1911|transcript_HQ_SAB_transcript26797/f2p0/1188|transcript_HQ_SAB_transcript17670/f7p0/1722|transcript_HQ_BAB_transcript12236/f2p0/2305|tra…	http://www.genome.jp/kegg-bin/show_pathway?ko00430/K10712%09red/K01580%09red/K18592%09red
Fatty acid biosynthesis	KEGG PATHWAY	ko00061	44	55	0.350238	0.879595	transcript_HQ_SAB_transcript4088/f2p0/3083|transcript_HQ_SAB_transcript21320/f2p0/1539|transcript_HQ_SAB_transcript23609/f2p0/1399|transcript_HQ_BAB_transcript7511/f2p0/2885|transcript_HQ_BAB_transcript9178/f2p0/2672|transcript_HQ_SAB_transcript5041/f2p0/2934|transcript_HQ_SAB_transcript11914/f2p0/2134|transcript_HQ_BAB_transcript11077/f6p0/2424|transcript_HQ_SAB_transcript9648/f4p0/2307|transcri…	http://www.genome.jp/kegg-bin/show_pathway?ko00061/K10781%09red/K10782%09red/K00059%09red/K01962%09red/K02160%09red/K01897%09red/K11262%09red/K03921%09red/K09458%09red
Endocytosis	KEGG PATHWAY	ko04144	160	211	0.355245	0.879595	transcript_HQ_SAB_transcript6483/f3p0/2682|transcript_HQ_BAB_transcript3164/f2p0/3647|transcript_HQ_BAB_transcript6371/f5p0/3037|transcript_HQ_SAB_transcript14849/f3p0/1930|transcript_HQ_SAB_transcript28511/f2p0/1016|transcript_HQ_SAB_transcript1749/f3p0/3739|transcript_HQ_BAB_transcript9128/f2p0/2677|transcript_HQ_SAB_transcript10753/f2p0/2230|transcript_HQ_SAB_transcript5017/f2p0/2886|transcrip…	http://www.genome.jp/kegg-bin/show_pathway?ko04144/K10591%09red/K01115%09red/K12471%09red/K19366%09red/K19367%09red/K12479%09red/K19476%09red/K18466%09red/K12192%09red/K12193%09red/K12191%09red/K12196%09red/K18443%09red/K12194%09red/K04646%09red/K18468%09red/K12198%09red/K15053%09red/K17917%09red/K12200%09red/K12489%09red/K07937%09red/K12486%09red/K05756%09red/K12483%09red/K11826%09red/K01528%09r…
alpha-Linolenic acid metabolism	KEGG PATHWAY	ko00592	82	106	0.35773	0.879595	transcript_HQ_BAB_transcript11095/f2p0/2460|transcript_HQ_SAB_transcript22045/f2p0/1496|transcript_HQ_BAB_transcript15666/f2p0/1934|transcript_HQ_SAB_transcript21191/f2p0/1545|transcript_HQ_SAB_transcript4687/f5p0/2927|transcript_HQ_BAB_transcript5669/f9p0/3132|transcript_HQ_SAB_transcript6357/f3p0/2721|transcript_HQ_BAB_transcript17509/f5p0/1736|transcript_HQ_BAB_transcript8060/f2p0/2817|transcr…	http://www.genome.jp/kegg-bin/show_pathway?ko00592/K01723%09red/K05894%09red/K18857%09red/K08241%09red/K00232%09red/K00454%09red/K10527%09red/K14674%09red/K10528%09red/K07513%09red/K10525%09red
Pentose phosphate pathway	KEGG PATHWAY	ko00030	72	93	0.368023	0.879595	transcript_HQ_SAB_transcript13232/f2p0/2033|transcript_HQ_SAB_transcript20706/f2p0/1580|transcript_HQ_BAB_transcript13125/f2p0/2216|transcript_HQ_SAB_transcript19093/f2p0/1670|transcript_HQ_BAB_transcript9715/f2p0/2600|transcript_HQ_SAB_transcript8626/f2p0/2429|transcript_HQ_SAB_transcript24234/f4p0/1331|transcript_HQ_SAB_transcript26436/f7p0/1171|transcript_HQ_SAB_transcript11954/f2p0/2135|trans…	http://www.genome.jp/kegg-bin/show_pathway?ko00030/K03841%09red/K00850%09red/K00131%09red/K01835%09red/K00615%09red/K00895%09red/K01807%09red/K01057%09red/K00948%09red/K01623%09red/K00616%09red/K01810%09red/K00036%09red/K01783%09red/K00033%09red
Glycerolipid metabolism	KEGG PATHWAY	ko00561	60	77	0.370429	0.879595	transcript_HQ_BAB_transcript19117/f2p0/1488|transcript_HQ_SAB_transcript16238/f4p0/1827|transcript_LQ_SAB_transcript25811/f2p0/1225|transcript_HQ_SAB_transcript13118/f3p0/2062|transcript_HQ_SAB_transcript7095/f9p0/2586|transcript_HQ_SAB_transcript13984/f3p0/1985|transcript_HQ_BAB_transcript19259/f3p0/1483|transcript_HQ_BAB_transcript17089/f4p0/1776|transcript_HQ_BAB_transcript6484/f13p0/2942|tran…	http://www.genome.jp/kegg-bin/show_pathway?ko00561/K15728%09red/K09480%09red/K14457%09red/K13523%09red/K00630%09red/K01054%09red/K03715%09red/K00128%09red/K13508%09red/K00679%09red/K00901%09red/K14674%09red/K00011%09red/K11155%09red/K14085%09red/K13506%09red/K13513%09red/K06119%09red/K06118%09red
Porphyrin and chlorophyll metabolism	KEGG PATHWAY	ko00860	51	65	0.371649	0.879595	transcript_HQ_BAB_transcript18544/f3p0/1611|transcript_HQ_BAB_transcript13347/f2p0/2187|transcript_HQ_BAB_transcript18993/f2p0/1573|transcript_HQ_BAB_transcript15938/f2p0/1913|transcript_HQ_BAB_transcript9604/f2p0/2661|transcript_HQ_SAB_transcript381/f121p0/4546|transcript_HQ_SAB_transcript2147/f2p0/3513|transcript_HQ_SAB_transcript23391/f2p0/1404|transcript_HQ_SAB_transcript18823/f5p0/1684|trans…	http://www.genome.jp/kegg-bin/show_pathway?ko00860/K02257%09red/K01749%09red/K19073%09red/K02492%09red/K04040%09red/K18010%09red/K00228%09red/K01698%09red/K10960%09red/K13606%09red/K01772%09red/K01719%09red/K08099%09red/K13071%09red/K04035%09red/K03403%09red/K01845%09red/K03428%09red/K01885%09red/K03404%09red/K03405%09red/K00218%09red
Biosynthesis of unsaturated fatty acids	KEGG PATHWAY	ko01040	25	31	0.396195	0.879595	transcript_HQ_BAB_transcript15666/f2p0/1934|transcript_HQ_SAB_transcript25086/f3p0/1288|transcript_HQ_BAB_transcript8060/f2p0/2817|transcript_HQ_SAB_transcript19194/f4p0/1649|transcript_HQ_SAB_transcript18599/f4p0/1711|transcript_HQ_SAB_transcript17205/f4p0/1831|transcript_HQ_SAB_transcript8412/f3p0/2467|transcript_HQ_BAB_transcript10988/f2p0/2458|transcript_HQ_SAB_transcript7952/f2p0/2500|transc…	http://www.genome.jp/kegg-bin/show_pathway?ko01040/K00059%09red/K00232%09red/K10256%09red/K07513%09red/K03921%09red/K10251%09red
Steroid biosynthesis	KEGG PATHWAY	ko00100	28	35	0.39646	0.879595	transcript_HQ_BAB_transcript12703/f2p0/2245|transcript_HQ_BAB_transcript13499/f22p0/2122|transcript_HQ_SAB_transcript12264/f2p0/2089|transcript_HQ_SAB_transcript12898/f35p0/2032|transcript_HQ_SAB_transcript17999/f2p0/1741|transcript_HQ_BAB_transcript17383/f3p0/1750|transcript_HQ_BAB_transcript14027/f2p0/2103|transcript_HQ_BAB_transcript19419/f2p0/1432|transcript_HQ_SAB_transcript13766/f5p0/1997|t…	http://www.genome.jp/kegg-bin/show_pathway?ko00100/K05917%09red/K09832%09red/K00227%09red/K01052%09red/K08242%09red/K00801%09red/K08246%09red/K00511%09red/K14674%09red/K14423%09red/K09828%09red
Other types of O-glycan biosynthesis	KEGG PATHWAY	ko00514	9	10	0.402292	0.879595	transcript_HQ_BAB_transcript2688/f3p0/3774|transcript_HQ_BAB_transcript2867/f3p0/3709|transcript_HQ_SAB_transcript398/f2p0/4613|transcript_HQ_BAB_transcript2493/f2p0/3819|transcript_HQ_SAB_transcript1533/f2p0/3767|transcript_HQ_BAB_transcript3315/f2p0/3609|transcript_HQ_BAB_transcript11663/f6p0/2339|transcript_HQ_SAB_transcript332/f2p0/4803|transcript_HQ_SAB_transcript1679/f3p0/3706	http://www.genome.jp/kegg-bin/show_pathway?ko00514/K09667%09red/K03691%09red
Ubiquinone and other terpenoid-quinone biosynthesis	KEGG PATHWAY	ko00130	33	42	0.409121	0.879595	transcript_HQ_SAB_transcript22769/f4p0/1440|transcript_HQ_BAB_transcript13240/f2p0/2020|transcript_HQ_SAB_transcript25026/f2p0/1295|transcript_HQ_BAB_transcript11154/f7p0/2353|transcript_HQ_SAB_transcript23496/f2p0/1398|transcript_HQ_SAB_transcript16191/f2p0/1874|transcript_HQ_SAB_transcript14151/f3p0/1996|transcript_HQ_SAB_transcript12658/f4p0/2083|transcript_HQ_BAB_transcript3221/f2p0/3617|tran…	http://www.genome.jp/kegg-bin/show_pathway?ko00130/K14760%09red/K05928%09red/K06126%09red/K06125%09red/K00457%09red/K09834%09red/K14759%09red/K00815%09red/K09833%09red/K03809%09red/K00487%09red/K01904%09red
SNARE interactions in vesicular transport	KEGG PATHWAY	ko04130	18	22	0.411123	0.879595	transcript_HQ_SAB_transcript27215/f8p0/1110|transcript_HQ_SAB_transcript26453/f4p0/1190|transcript_HQ_SAB_transcript26009/f3p0/1238|transcript_HQ_SAB_transcript26366/f4p0/1151|transcript_HQ_SAB_transcript25407/f2p0/1264|transcript_HQ_BAB_transcript19848/f2p0/1317|transcript_HQ_SAB_transcript21063/f2p0/1550|transcript_HQ_SAB_transcript28422/f2p0/1020|transcript_HQ_SAB_transcript27830/f2p0/1167|tra…	http://www.genome.jp/kegg-bin/show_pathway?ko04130/K08496%09red/K08490%09red/K08486%09red/K08493%09red/K08503%09red/K08506%09red/K08507%09red/K08517%09red/K08516%09red/K08515%09red
Terpenoid backbone biosynthesis	KEGG PATHWAY	ko00900	78	103	0.416131	0.879595	transcript_HQ_BAB_transcript19045/f8p0/1485|transcript_HQ_SAB_transcript24863/f3p0/1310|transcript_HQ_SAB_transcript2268/f2p0/3491|transcript_HQ_SAB_transcript25467/f3p0/1258|transcript_HQ_SAB_transcript8199/f2p0/2471|transcript_HQ_BAB_transcript18313/f2p0/1622|transcript_HQ_SAB_transcript11515/f2p0/2172|transcript_HQ_BAB_transcript19263/f3p0/1457|transcript_HQ_BAB_transcript8135/f5p0/2778|transc…	http://www.genome.jp/kegg-bin/show_pathway?ko00900/K00938%09red/K12742%09red/K00919%09red/K14066%09red/K01662%09red/K10960%09red/K00099%09red/K03526%09red/K00991%09red/K01597%09red/K05356%09red/K06013%09red/K03527%09red/K00787%09red/K13789%09red/K01770%09red/K01641%09red/K00021%09red/K00626%09red/K11778%09red
Photosynthesis - antenna proteins	KEGG PATHWAY	ko00196	23	29	0.426979	0.879595	transcript_HQ_SAB_transcript28308/f22p0/1013|transcript_HQ_SAB_transcript28941/f5p0/971|transcript_HQ_SAB_transcript25555/f2p0/1254|transcript_HQ_BAB_transcript20268/f4p0/1110|transcript_HQ_BAB_transcript20269/f2p0/1124|transcript_HQ_BAB_transcript20292/f2p0/1118|transcript_HQ_SAB_transcript25355/f4p0/1232|transcript_HQ_SAB_transcript21954/f3p0/1493|transcript_HQ_SAB_transcript26142/f2p0/1235|tra…	http://www.genome.jp/kegg-bin/show_pathway?ko00196/K14172%09red/K08908%09red/K08909%09red/K08915%09red/K08907%09red/K08917%09red/K08916%09red/K08911%09red/K08910%09red/K08912%09red
Butanoate metabolism	KEGG PATHWAY	ko00650	20	25	0.428211	0.879595	transcript_HQ_SAB_transcript23508/f3p0/1394|transcript_HQ_BAB_transcript1344/f2p0/4208|transcript_HQ_SAB_transcript21789/f5p0/1437|transcript_HQ_SAB_transcript3518/f6p0/3135|transcript_HQ_SAB_transcript15827/f3p0/1847|transcript_HQ_SAB_transcript14682/f16p0/1911|transcript_HQ_SAB_transcript18036/f7p0/1739|transcript_HQ_BAB_transcript15567/f4p0/1947|transcript_HQ_SAB_transcript29742/f2p0/909|trans…	http://www.genome.jp/kegg-bin/show_pathway?ko00650/K01641%09red/K17761%09red/K18121%09red/K01580%09red/K01653%09red/K01652%09red/K00626%09red
C5-Branched dibasic acid metabolism	KEGG PATHWAY	ko00660	11	13	0.429296	0.879595	transcript_HQ_BAB_transcript20087/f2p0/1222|transcript_HQ_SAB_transcript17302/f2p0/1796|transcript_HQ_BAB_transcript15390/f2p0/1979|transcript_HQ_BAB_transcript16267/f7p0/1872|transcript_HQ_BAB_transcript10749/f2p0/2497|transcript_HQ_SAB_transcript14445/f7p0/1927|transcript_HQ_BAB_transcript11019/f2p0/2454|transcript_HQ_BAB_transcript17481/f2p0/1743|transcript_HQ_SAB_transcript26013/f11p0/1127|tr…	http://www.genome.jp/kegg-bin/show_pathway?ko00660/K01652%09red/K01704%09red/K01703%09red/K01653%09red/K00052%09red
Thiamine metabolism	KEGG PATHWAY	ko00730	14	17	0.429684	0.879595	transcript_HQ_BAB_transcript12296/f22p0/2225|transcript_HQ_SAB_transcript14690/f5p0/1941|transcript_HQ_SAB_transcript5765/f2p0/2773|transcript_HQ_SAB_transcript7563/f2p0/2558|transcript_HQ_SAB_transcript25492/f2p0/1264|transcript_HQ_SAB_transcript8199/f2p0/2471|transcript_HQ_BAB_transcript10272/f6p0/2540|transcript_HQ_BAB_transcript18658/f2p0/1571|transcript_HQ_BAB_transcript12758/f2p0/2270|trans…	http://www.genome.jp/kegg-bin/show_pathway?ko00730/K00949%09red/K14153%09red/K03147%09red/K03146%09red/K01662%09red
Regulation of autophagy	KEGG PATHWAY	ko04140	40	52	0.430149	0.879595	transcript_HQ_SAB_transcript13127/f2p0/2064|transcript_HQ_SAB_transcript7909/f2p0/2514|transcript_HQ_SAB_transcript30886/f2p0/775|transcript_HQ_SAB_transcript13432/f6p0/2004|transcript_HQ_SAB_transcript11214/f4p0/2166|transcript_HQ_SAB_transcript11704/f3p0/2150|transcript_HQ_SAB_transcript195/f7p0/5128|transcript_HQ_SAB_transcript24163/f6p0/1310|transcript_HQ_SAB_transcript5993/f2p0/2814|transcri…	http://www.genome.jp/kegg-bin/show_pathway?ko04140/K08342%09red/K08341%09red/K08269%09red/K08343%09red/K07198%09red/K08331%09red/K08330%09red/K08333%09red/K08332%09red/K08334%09red/K08337%09red
beta-Alanine metabolism	KEGG PATHWAY	ko00410	54	71	0.431284	0.879595	transcript_HQ_BAB_transcript1993/f2p0/3963|transcript_HQ_SAB_transcript4784/f2p0/2930|transcript_HQ_SAB_transcript11924/f4p0/2145|transcript_HQ_BAB_transcript1344/f2p0/4208|transcript_HQ_SAB_transcript13118/f3p0/2062|transcript_HQ_SAB_transcript13984/f3p0/1985|transcript_HQ_BAB_transcript15567/f4p0/1947|transcript_HQ_SAB_transcript6935/f3p0/2621|transcript_HQ_SAB_transcript21571/f3p0/1517|transcr…	http://www.genome.jp/kegg-bin/show_pathway?ko00410/K00276%09red/K17839%09red/K12259%09red/K05605%09red/K00140%09red/K00128%09red/K00797%09red/K01580%09red/K14085%09red/K13366%09red
Tryptophan metabolism	KEGG PATHWAY	ko00380	31	40	0.436503	0.879595	transcript_HQ_SAB_transcript20629/f5p0/1578|transcript_HQ_SAB_transcript13118/f3p0/2062|transcript_HQ_SAB_transcript13984/f3p0/1985|transcript_HQ_BAB_transcript14574/f2p0/2079|transcript_HQ_SAB_transcript17415/f2p0/1766|transcript_HQ_SAB_transcript20891/f2p0/1567|transcript_HQ_SAB_transcript5780/f2p0/2753|transcript_HQ_SAB_transcript16882/f2p0/1808|transcript_HQ_SAB_transcript12236/f2p0/2108|tran…	http://www.genome.jp/kegg-bin/show_pathway?ko00380/K03781%09red/K00164%09red/K00128%09red/K07408%09red/K14085%09red/K01426%09red/K00626%09red/K11820%09red
Arginine and proline metabolism	KEGG PATHWAY	ko00330	78	104	0.441261	0.879595	transcript_HQ_BAB_transcript1993/f2p0/3963|transcript_HQ_SAB_transcript23010/f2p0/1442|transcript_HQ_SAB_transcript11924/f4p0/2145|transcript_HQ_SAB_transcript13118/f3p0/2062|transcript_HQ_SAB_transcript4784/f2p0/2930|transcript_HQ_BAB_transcript15183/f9p0/1922|transcript_HQ_SAB_transcript13984/f3p0/1985|transcript_HQ_SAB_transcript20377/f2p0/1601|transcript_HQ_SAB_transcript18062/f2p0/1746|trans…	http://www.genome.jp/kegg-bin/show_pathway?ko00330/K00318%09red/K12259%09red/K14454%09red/K14455%09red/K00294%09red/K00286%09red/K12251%09red/K00472%09red/K10536%09red/K00128%09red/K00811%09red/K00797%09red/K17839%09red/K01611%09red/K01583%09red/K14085%09red/K13366%09red/K00819%09red/K01426%09red/K12657%09red
One carbon pool by folate	KEGG PATHWAY	ko00670	22	28	0.443426	0.879595	transcript_HQ_SAB_transcript8115/f2p0/2492|transcript_HQ_SAB_transcript19332/f7p0/1622|transcript_HQ_SAB_transcript23931/f2p0/1380|transcript_HQ_SAB_transcript10333/f8p0/2228|transcript_HQ_BAB_transcript9189/f2p0/2685|transcript_HQ_BAB_transcript13207/f2p0/2199|transcript_HQ_SAB_transcript17238/f3p0/1778|transcript_HQ_SAB_transcript10738/f4p0/2228|transcript_HQ_SAB_transcript12921/f4p0/2051|trans…	http://www.genome.jp/kegg-bin/show_pathway?ko00670/K00297%09red/K00600%09red/K00602%09red/K01938%09red/K01934%09red/K00605%09red
Fructose and mannose metabolism	KEGG PATHWAY	ko00051	57	76	0.458733	0.879595	transcript_HQ_BAB_transcript17787/f16p0/1688|transcript_HQ_SAB_transcript8490/f2p0/2450|transcript_HQ_SAB_transcript8661/f2p0/2451|transcript_HQ_SAB_transcript20706/f2p0/1580|transcript_HQ_BAB_transcript13125/f2p0/2216|transcript_HQ_SAB_transcript7754/f2p0/2546|transcript_HQ_BAB_transcript12551/f3p0/2281|transcript_HQ_SAB_transcript11954/f2p0/2135|transcript_HQ_SAB_transcript21566/f5p0/1530|trans…	http://www.genome.jp/kegg-bin/show_pathway?ko00051/K00966%09red/K03841%09red/K00850%09red/K00844%09red/K01103%09red/K01803%09red/K00895%09red/K01805%09red/K01711%09red/K01623%09red/K19355%09red/K00847%09red/K00011%09red/K00008%09red/K05305%09red/K17497%09red
Glycolysis / Gluconeogenesis	KEGG PATHWAY	ko00010	148	201	0.467644	0.879595	transcript_HQ_BAB_transcript16441/f4p0/1857|transcript_HQ_SAB_transcript22045/f2p0/1496|transcript_HQ_BAB_transcript17286/f2p0/1769|transcript_HQ_SAB_transcript21191/f2p0/1545|transcript_HQ_BAB_transcript18476/f3p0/1615|transcript_HQ_SAB_transcript13984/f3p0/1985|transcript_HQ_SAB_transcript11564/f4p0/2229|transcript_HQ_SAB_transcript10040/f2p0/2346|transcript_HQ_SAB_transcript11906/f2p0/2157|tra…	http://www.genome.jp/kegg-bin/show_pathway?ko00010/K00850%09red/K01689%09red/K14085%09red/K00895%09red/K18857%09red/K01623%09red/K01810%09red/K00873%09red/K00627%09red/K00134%09red/K00131%09red/K01835%09red/K01834%09red/K01895%09red/K00016%09red/K00844%09red/K01792%09red/K03841%09red/K01610%09red/K00927%09red/K00001%09red/K01803%09red/K00161%09red/K00162%09red/K00128%09red/K01785%09red/K01568%09r…
Protein export	KEGG PATHWAY	ko03060	48	64	0.467851	0.879595	transcript_HQ_SAB_transcript6235/f2p0/2705|transcript_HQ_SAB_transcript5132/f2p0/2859|transcript_HQ_SAB_transcript12435/f6p0/2089|transcript_HQ_SAB_transcript30482/f5p0/823|transcript_HQ_SAB_transcript13404/f3p0/2021|transcript_HQ_SAB_transcript7184/f5p0/2601|transcript_HQ_SAB_transcript15745/f12p0/1852|transcript_HQ_BAB_transcript15189/f10p0/1951|transcript_HQ_BAB_transcript16579/f4p0/1839|trans…	http://www.genome.jp/kegg-bin/show_pathway?ko03060/K03070%09red/K03217%09red/K09481%09red/K09540%09red/K10956%09red/K07342%09red/K03110%09red/K12275%09red/K09490%09red/K12272%09red/K03116%09red/K03108%09red/K03107%09red/K03106%09red/K09648%09red/K13431%09red/K12947%09red/K03100%09red
Pentose and glucuronate interconversions	KEGG PATHWAY	ko00040	44	59	0.48359	0.879595	transcript_HQ_SAB_transcript17726/f2p0/1760|transcript_HQ_SAB_transcript14465/f2p0/1948|transcript_HQ_BAB_transcript6196/f2p0/3068|transcript_HQ_SAB_transcript13726/f11p0/1986|transcript_HQ_SAB_transcript13118/f3p0/2062|transcript_HQ_SAB_transcript22570/f2p0/1455|transcript_HQ_SAB_transcript13984/f3p0/1985|transcript_HQ_SAB_transcript17285/f4p0/1755|transcript_HQ_SAB_transcript23210/f2p0/1406|tra…	http://www.genome.jp/kegg-bin/show_pathway?ko00040/K00963%09red/K01805%09red/K00008%09red/K00128%09red/K01051%09red/K01783%09red/K12447%09red/K00011%09red/K00012%09red/K01728%09red
Cutin, suberine and wax biosynthesis	KEGG PATHWAY	ko00073	6	7	0.48668	0.879595	transcript_HQ_SAB_transcript12992/f2p0/2052|transcript_HQ_SAB_transcript11331/f2p0/2193|transcript_HQ_SAB_transcript9699/f7p0/2306|transcript_HQ_SAB_transcript15459/f3p0/1936|transcript_HQ_SAB_transcript10725/f10p0/2227|transcript_HQ_SAB_transcript15003/f6p0/1879	http://www.genome.jp/kegg-bin/show_pathway?ko00073/K15404%09red/K15401%09red/K15400%09red/K15403%09red/K15402%09red/K15398%09red
Phenylalanine, tyrosine and tryptophan biosynthesis	KEGG PATHWAY	ko00400	41	55	0.487621	0.879595	transcript_HQ_SAB_transcript23010/f2p0/1442|transcript_HQ_BAB_transcript9876/f2p0/2585|transcript_HQ_SAB_transcript17431/f2p0/1777|transcript_HQ_SAB_transcript13863/f3p0/1996|transcript_HQ_SAB_transcript16191/f2p0/1874|transcript_HQ_BAB_transcript15229/f3p0/1980|transcript_HQ_SAB_transcript14701/f3p0/1951|transcript_HQ_BAB_transcript13701/f3p0/2125|transcript_HQ_SAB_transcript18034/f11p0/1708|tra…	http://www.genome.jp/kegg-bin/show_pathway?ko00400/K14455%09red/K14454%09red/K01695%09red/K01696%09red/K15849%09red/K01736%09red/K00811%09red/K01735%09red/K00766%09red/K00815%09red/K01626%09red/K00817%09red/K13832%09red/K05359%09red/K15227%09red/K01609%09red
Ubiquitin mediated proteolysis	KEGG PATHWAY	ko04120	118	161	0.491147	0.879595	transcript_HQ_SAB_transcript1057/f2p0/3988|transcript_HQ_BAB_transcript11109/f3p0/2431|transcript_HQ_BAB_transcript12779/f3p0/2236|transcript_HQ_BAB_transcript132/f8p0/5584|transcript_HQ_SAB_transcript28889/f16p0/916|transcript_HQ_SAB_transcript27382/f2p0/1116|transcript_HQ_BAB_transcript9425/f2p0/2633|transcript_HQ_SAB_transcript10242/f2p0/2277|transcript_HQ_SAB_transcript13073/f2p0/2055|transcr…	http://www.genome.jp/kegg-bin/show_pathway?ko04120/K10601%09red/K10597%09red/K10590%09red/K10591%09red/K10578%09red/K06688%09red/K10576%09red/K10577%09red/K10575%09red/K10598%09red/K10573%09red/K04506%09red/K10580%09red/K10592%09red/K10599%09red/K04706%09red/K20217%09red/K03352%09red/K03350%09red/K03357%09red/K10583%09red/K10143%09red/K10581%09red/K10140%09red/K10144%09red/K03094%09red/K10589%09r…
Zeatin biosynthesis	KEGG PATHWAY	ko00908	11	14	0.498028	0.879595	transcript_HQ_SAB_transcript10497/f5p0/2244|transcript_HQ_SAB_transcript18734/f4p0/1695|transcript_HQ_SAB_transcript13670/f2p0/2016|transcript_HQ_SAB_transcript18396/f2p0/1722|transcript_HQ_BAB_transcript18386/f4p0/1606|transcript_HQ_BAB_transcript10810/f3p0/2457|transcript_HQ_SAB_transcript9754/f5p0/2315|transcript_HQ_SAB_transcript20859/f2p0/1568|transcript_HQ_BAB_transcript9076/f3p0/2723|trans…	http://www.genome.jp/kegg-bin/show_pathway?ko00908/K13495%09red/K00279%09red/K10760%09red
Arginine biosynthesis	KEGG PATHWAY	ko00220	37	50	0.505636	0.879595	transcript_HQ_SAB_transcript21867/f5p0/1506|transcript_HQ_SAB_transcript23010/f2p0/1442|transcript_HQ_SAB_transcript15098/f2p0/1894|transcript_HQ_SAB_transcript3870/f5p0/3096|transcript_HQ_BAB_transcript18238/f2p0/1636|transcript_HQ_BAB_transcript19177/f2p0/1485|transcript_HQ_SAB_transcript27148/f2p0/1131|transcript_HQ_SAB_transcript18557/f4p0/1707|transcript_HQ_BAB_transcript3764/f2p0/3507|trans…	http://www.genome.jp/kegg-bin/show_pathway?ko00220/K00261%09red/K14455%09red/K14454%09red/K01438%09red/K14272%09red/K01940%09red/K00811%09red/K00611%09red/K00814%09red/K14682%09red/K01915%09red/K00818%09red/K14677%09red/K01427%09red
Linoleic acid metabolism	KEGG PATHWAY	ko00591	34	46	0.51093	0.879595	transcript_HQ_BAB_transcript5669/f9p0/3132|transcript_HQ_SAB_transcript6357/f3p0/2721|transcript_HQ_SAB_transcript3688/f3p0/3117|transcript_HQ_SAB_transcript3317/f11p0/3207|transcript_HQ_SAB_transcript9107/f2p0/2391|transcript_HQ_BAB_transcript5969/f2p0/3106|transcript_HQ_BAB_transcript7093/f2p0/2935|transcript_HQ_SAB_transcript15313/f2p0/1836|transcript_HQ_SAB_transcript15228/f5p0/1885|transcrip…	http://www.genome.jp/kegg-bin/show_pathway?ko00591/K14674%09red/K00454%09red/K15718%09red/K07418%09red
Valine, leucine and isoleucine biosynthesis	KEGG PATHWAY	ko00290	26	35	0.513404	0.879595	transcript_HQ_BAB_transcript11567/f2p0/2383|transcript_HQ_SAB_transcript9490/f5p0/2350|transcript_HQ_BAB_transcript15390/f2p0/1979|transcript_HQ_SAB_transcript14445/f7p0/1927|transcript_HQ_SAB_transcript29742/f2p0/909|transcript_HQ_BAB_transcript12311/f3p0/2288|transcript_HQ_SAB_transcript9560/f2p0/2342|transcript_HQ_SAB_transcript22068/f2p0/1486|transcript_HQ_SAB_transcript21180/f2p0/1538|transc…	http://www.genome.jp/kegg-bin/show_pathway?ko00290/K01754%09red/K01652%09red/K01687%09red/K00052%09red/K00053%09red/K01649%09red/K00826%09red/K01704%09red/K01703%09red/K01653%09red
Folate biosynthesis	KEGG PATHWAY	ko00790	10	13	0.524623	0.879595	transcript_HQ_SAB_transcript3163/f2p0/3255|transcript_HQ_BAB_transcript6349/f2p0/3046|transcript_HQ_BAB_transcript9209/f3p0/2653|transcript_HQ_SAB_transcript11208/f3p0/2210|transcript_HQ_SAB_transcript22665/f2p0/1444|transcript_HQ_BAB_transcript13512/f3p0/2169|transcript_HQ_BAB_transcript16488/f2p0/1863|transcript_HQ_SAB_transcript7224/f2p0/2595|transcript_HQ_SAB_transcript3551/f2p0/3250|transcri…	http://www.genome.jp/kegg-bin/show_pathway?ko00790/K18482%09red/K13950%09red/K01930%09red/K01307%09red/K01495%09red
Valine, leucine and isoleucine degradation	KEGG PATHWAY	ko00280	50	69	0.538908	0.879595	transcript_HQ_SAB_transcript6608/f6p0/2627|transcript_HQ_SAB_transcript17372/f2p0/1780|transcript_HQ_SAB_transcript13118/f3p0/2062|transcript_HQ_BAB_transcript12325/f3p0/2384|transcript_HQ_SAB_transcript14877/f2p0/1922|transcript_HQ_SAB_transcript23603/f2p0/1411|transcript_HQ_SAB_transcript13984/f3p0/1985|transcript_HQ_BAB_transcript10053/f2p0/2564|transcript_HQ_SAB_transcript22821/f2p0/1446|tran…	http://www.genome.jp/kegg-bin/show_pathway?ko00280/K00140%09red/K01641%09red/K05607%09red/K05605%09red/K00167%09red/K18660%09red/K00626%09red/K00128%09red/K00827%09red/K00826%09red/K00382%09red/K14085%09red/K00253%09red/K07513%09red/K00020%09red/K01969%09red/K01968%09red
Carotenoid biosynthesis	KEGG PATHWAY	ko00906	29	40	0.548063	0.879595	transcript_HQ_SAB_transcript347/f2p0/4740|transcript_HQ_SAB_transcript11844/f14p0/2122|transcript_HQ_BAB_transcript607/f2p0/4695|transcript_HQ_SAB_transcript15684/f5p0/1859|transcript_HQ_BAB_transcript668/f3p0/4639|transcript_HQ_SAB_transcript15760/f3p0/1840|transcript_HQ_BAB_transcript17303/f7p0/1695|transcript_HQ_SAB_transcript7621/f2p0/2582|transcript_HQ_BAB_transcript10066/f2p0/2558|transcrip…	http://www.genome.jp/kegg-bin/show_pathway?ko00906/K09840%09red/K09841%09red/K09842%09red/K09843%09red/K02291%09red/K02293%09red/K06444%09red/K09838%09red/K09837%09red/K15746%09red/K06443%09red/K09839%09red/K00514%09red/K15747%09red
Propanoate metabolism	KEGG PATHWAY	ko00640	39	54	0.549343	0.879595	transcript_HQ_BAB_transcript12325/f3p0/2384|transcript_HQ_SAB_transcript15965/f2p0/1885|transcript_HQ_SAB_transcript17372/f2p0/1780|transcript_HQ_BAB_transcript7511/f2p0/2885|transcript_HQ_SAB_transcript5041/f2p0/2934|transcript_HQ_BAB_transcript6812/f2p0/2991|transcript_HQ_SAB_transcript6935/f3p0/2621|transcript_HQ_SAB_transcript21571/f3p0/1517|transcript_HQ_SAB_transcript17157/f2p0/1789|transcr…	http://www.genome.jp/kegg-bin/show_pathway?ko00640/K00140%09red/K01899%09red/K05605%09red/K00382%09red/K00167%09red/K01900%09red/K01962%09red/K02160%09red/K01895%09red/K11262%09red/K00626%09red/K00016%09red
Nicotinate and nicotinamide metabolism	KEGG PATHWAY	ko00760	14	19	0.549474	0.879595	transcript_HQ_SAB_transcript7229/f2p0/2590|transcript_HQ_SAB_transcript11212/f5p0/2166|transcript_HQ_SAB_transcript21782/f2p0/1513|transcript_HQ_BAB_transcript10133/f2p0/2563|transcript_HQ_BAB_transcript16351/f2p0/1869|transcript_HQ_BAB_transcript8793/f4p0/2665|transcript_HQ_SAB_transcript25832/f4p0/1211|transcript_HQ_SAB_transcript1700/f2p0/3697|transcript_HQ_BAB_transcript4497/f4p0/3359|transcr…	http://www.genome.jp/kegg-bin/show_pathway?ko00760/K18551%09red/K03787%09red/K00858%09red/K00278%09red/K01950%09red/K00763%09red/K00767%09red/K01081%09red/K03426%09red/K03517%09red
Nitrogen metabolism	KEGG PATHWAY	ko00910	44	61	0.550177	0.879595	transcript_HQ_SAB_transcript16056/f2p0/1854|transcript_HQ_BAB_transcript146/f68p0/5467|transcript_HQ_BAB_transcript12218/f2p0/2297|transcript_HQ_BAB_transcript18238/f2p0/1636|transcript_HQ_SAB_transcript15473/f2p0/1899|transcript_HQ_SAB_transcript15272/f9p0/1864|transcript_HQ_BAB_transcript19177/f2p0/1485|transcript_HQ_SAB_transcript13433/f2p0/2027|transcript_HQ_SAB_transcript27148/f2p0/1131|tran…	http://www.genome.jp/kegg-bin/show_pathway?ko00910/K01673%09red/K00261%09red/K01674%09red/K00284%09red/K00264%09red/K01725%09red/K10534%09red/K01915%09red/K00366%09red/K01455%09red
Fatty acid elongation	KEGG PATHWAY	ko00062	16	22	0.559544	0.879595	transcript_HQ_SAB_transcript23918/f4p0/1359|transcript_HQ_BAB_transcript14457/f2p0/2066|transcript_HQ_SAB_transcript699/f2p0/4230|transcript_HQ_BAB_transcript18656/f2p0/1577|transcript_HQ_BAB_transcript15954/f2p0/1916|transcript_HQ_SAB_transcript9406/f9p0/2300|transcript_HQ_BAB_transcript17473/f2p0/1741|transcript_HQ_SAB_transcript4619/f2p0/2938|transcript_HQ_SAB_transcript17191/f7p0/1791|transcr…	http://www.genome.jp/kegg-bin/show_pathway?ko00062/K07512%09red/K10251%09red/K15397%09red/K01074%09red
Riboflavin metabolism	KEGG PATHWAY	ko00740	4	5	0.568506	0.879595	transcript_HQ_BAB_transcript15897/f2p0/1941|transcript_HQ_BAB_transcript13437/f10p0/2124|transcript_HQ_BAB_transcript19881/f2p0/1318|transcript_HQ_SAB_transcript17171/f2p0/1786	http://www.genome.jp/kegg-bin/show_pathway?ko00740/K00793%09red/K14652%09red/K11752%09red
N-Glycan biosynthesis	KEGG PATHWAY	ko00510	30	42	0.571797	0.879595	transcript_HQ_SAB_transcript8343/f13p0/2416|transcript_HQ_BAB_transcript675/f2p0/4624|transcript_HQ_BAB_transcript13961/f2p0/2050|transcript_HQ_SAB_transcript8556/f2p0/2460|transcript_HQ_BAB_transcript14827/f2p0/2050|transcript_HQ_SAB_transcript10149/f2p0/2303|transcript_HQ_BAB_transcript5045/f4p0/3283|transcript_HQ_BAB_transcript7726/f2p0/2877|transcript_HQ_BAB_transcript10808/f2p0/2476|transcri…	http://www.genome.jp/kegg-bin/show_pathway?ko00510/K03842%09red/K01001%09red/K12666%09red/K12667%09red/K01228%09red/K00729%09red/K00726%09red/K00737%09red/K12670%09red/K07151%09red/K05546%09red/K00902%09red/K07252%09red/K01231%09red/K01230%09red
Phagosome	KEGG PATHWAY	ko04145	62	87	0.575557	0.879595	transcript_HQ_SAB_transcript17391/f3p0/1803|transcript_HQ_BAB_transcript20316/f2p0/1085|transcript_HQ_SAB_transcript20320/f3p0/1595|transcript_HQ_BAB_transcript17746/f3p0/1713|transcript_HQ_BAB_transcript16579/f4p0/1839|transcript_HQ_BAB_transcript17269/f5p0/1748|transcript_HQ_BAB_transcript13551/f3p0/2155|transcript_HQ_SAB_transcript8560/f3p0/2444|transcript_HQ_BAB_transcript9476/f5p0/2637|trans…	http://www.genome.jp/kegg-bin/show_pathway?ko04145/K08517%09red/K04392%09red/K02155%09red/K02154%09red/K02153%09red/K02152%09red/K02151%09red/K02150%09red/K09481%09red/K10956%09red/K07374%09red/K07375%09red/K03661%09red/K00921%09red/K02144%09red/K02145%09red/K02146%09red/K02147%09red/K02148%09red/K02149%09red/K07897%09red/K08054%09red/K08057%09red/K07342%09red
Sphingolipid metabolism	KEGG PATHWAY	ko00600	20	28	0.576819	0.879595	transcript_HQ_SAB_transcript5077/f2p0/2868|transcript_HQ_BAB_transcript912/f2p0/4448|transcript_HQ_BAB_transcript6810/f3p0/2985|transcript_HQ_SAB_transcript24385/f2p0/1335|transcript_HQ_BAB_transcript15944/f3p0/1949|transcript_HQ_SAB_transcript10989/f2p0/2239|transcript_HQ_SAB_transcript24610/f4p0/1320|transcript_HQ_BAB_transcript6751/f2p0/2970|transcript_HQ_SAB_transcript12920/f8p0/2022|transcri…	http://www.genome.jp/kegg-bin/show_pathway?ko00600/K01190%09red/K00654%09red/K12309%09red/K04711%09red/K01634%09red/K04708%09red/K17108%09red/K12349%09red
Pantothenate and CoA biosynthesis	KEGG PATHWAY	ko00770	20	28	0.576819	0.879595	transcript_HQ_BAB_transcript17528/f2p0/1729|transcript_HQ_BAB_transcript12311/f3p0/2288|transcript_HQ_SAB_transcript9490/f5p0/2350|transcript_HQ_BAB_transcript11567/f2p0/2383|transcript_HQ_SAB_transcript29549/f4p0/909|transcript_HQ_SAB_transcript22068/f2p0/1486|transcript_HQ_BAB_transcript10749/f2p0/2497|transcript_HQ_BAB_transcript16826/f3p0/1830|transcript_HQ_SAB_transcript17302/f2p0/1796|trans…	http://www.genome.jp/kegg-bin/show_pathway?ko00770/K01687%09red/K00859%09red/K00053%09red/K00826%09red/K09680%09red/K01653%09red/K01652%09red
Vitamin B6 metabolism	KEGG PATHWAY	ko00750	8	11	0.585283	0.879595	transcript_HQ_BAB_transcript20063/f2p0/1233|transcript_HQ_SAB_transcript25557/f6p0/1241|transcript_HQ_BAB_transcript14939/f4p0/2018|transcript_HQ_SAB_transcript23421/f5p0/1381|transcript_HQ_BAB_transcript20187/f4p0/1099|transcript_HQ_SAB_transcript16799/f34p0/1785|transcript_HQ_BAB_transcript19526/f4p0/1387|transcript_HQ_SAB_transcript28274/f2p0/1037	http://www.genome.jp/kegg-bin/show_pathway?ko00750/K13248%09red/K06215%09red/K00275%09red/K00831%09red
Inositol phosphate metabolism	KEGG PATHWAY	ko00562	51	72	0.587608	0.879595	transcript_HQ_BAB_transcript16548/f3p0/1845|transcript_HQ_SAB_transcript13168/f4p0/2028|transcript_HQ_BAB_transcript12090/f2p0/2328|transcript_HQ_BAB_transcript10417/f2p0/2511|transcript_HQ_SAB_transcript3863/f6p0/3077|transcript_HQ_SAB_transcript25807/f2p0/1232|transcript_HQ_SAB_transcript6935/f3p0/2621|transcript_HQ_SAB_transcript14520/f2p0/1966|transcript_HQ_BAB_transcript8613/f2p0/2750|transc…	http://www.genome.jp/kegg-bin/show_pathway?ko00562/K00915%09red/K00140%09red/K01092%09red/K19801%09red/K01110%09red/K01803%09red/K01114%09red/K05857%09red/K00921%09red/K01858%09red/K00913%09red/K18081%09red/K00469%09red/K10047%09red/K00889%09red/K00888%09red
Proteasome	KEGG PATHWAY	ko03050	63	89	0.591721	0.879595	transcript_HQ_SAB_transcript13481/f2p0/2021|transcript_HQ_BAB_transcript18739/f3p0/1555|transcript_HQ_SAB_transcript17122/f4p0/1776|transcript_HQ_SAB_transcript19733/f4p0/1631|transcript_HQ_BAB_transcript3631/f2p0/3385|transcript_HQ_BAB_transcript2437/f4p0/3798|transcript_HQ_SAB_transcript18027/f4p0/1689|transcript_HQ_BAB_transcript18025/f3p0/1695|transcript_HQ_BAB_transcript15784/f4p0/1923|trans…	http://www.genome.jp/kegg-bin/show_pathway?ko03050/K03064%09red/K03065%09red/K03066%09red/K03061%09red/K03062%09red/K10881%09red/K03028%09red/K03063%09red/K02728%09red/K02729%09red/K02725%09red/K02726%09red/K06699%09red/K03039%09red/K03038%09red/K03037%09red/K03036%09red/K03035%09red/K03033%09red/K03032%09red/K03031%09red/K11599%09red/K02738%09red/K02730%09red/K02737%09red/K02735%09red
Phenylpropanoid biosynthesis	KEGG PATHWAY	ko00940	58	82	0.592312	0.879595	transcript_HQ_SAB_transcript21987/f2p0/1508|transcript_HQ_SAB_transcript11907/f2p0/2136|transcript_HQ_BAB_transcript13240/f2p0/2020|transcript_HQ_SAB_transcript20996/f3p0/1565|transcript_HQ_SAB_transcript7089/f182p0/2543|transcript_HQ_SAB_transcript12864/f2p0/2052|transcript_HQ_SAB_transcript23496/f2p0/1398|transcript_HQ_BAB_transcript18880/f2p0/1533|transcript_HQ_SAB_transcript21713/f2p0/1520|tr…	http://www.genome.jp/kegg-bin/show_pathway?ko00940/K10775%09red/K13066%09red/K01188%09red/K00083%09red/K12355%09red/K05349%09red/K01904%09red/K09754%09red/K09755%09red/K00430%09red/K00487%09red/K00588%09red
Histidine metabolism	KEGG PATHWAY	ko00340	19	27	0.596972	0.879595	transcript_HQ_SAB_transcript12236/f2p0/2108|transcript_HQ_SAB_transcript5780/f2p0/2753|transcript_HQ_SAB_transcript13118/f3p0/2062|transcript_HQ_SAB_transcript15439/f3p0/1916|transcript_HQ_SAB_transcript16986/f2p0/1806|transcript_HQ_SAB_transcript13984/f3p0/1985|transcript_HQ_SAB_transcript16373/f2p0/1856|transcript_HQ_SAB_transcript23834/f2p0/1384|transcript_HQ_BAB_transcript17612/f11p0/1713|tra…	http://www.genome.jp/kegg-bin/show_pathway?ko00340/K01663%09red/K14085%09red/K01693%09red/K00128%09red/K00765%09red/K01590%09red/K00817%09red/K00013%09red
Spliceosome	KEGG PATHWAY	ko03040	225	316	0.605579	0.879595	transcript_HQ_BAB_transcript4270/f10p0/3361|transcript_HQ_BAB_transcript2879/f2p0/3709|transcript_HQ_BAB_transcript9128/f2p0/2677|transcript_HQ_SAB_transcript5017/f2p0/2886|transcript_HQ_BAB_transcript9598/f3p0/2622|transcript_HQ_SAB_transcript28202/f3p0/996|transcript_HQ_SAB_transcript14143/f5p0/1967|transcript_HQ_SAB_transcript171/f2p0/5184|transcript_HQ_SAB_transcript6632/f4p0/2657|transcript_…	http://www.genome.jp/kegg-bin/show_pathway?ko03040/K12874%09red/K12626%09red/K12870%09red/K10599%09red/K12900%09red/K12860%09red/K11086%09red/K06063%09red/K12867%09red/K12865%09red/K12844%09red/K12868%09red/K12847%09red/K12840%09red/K12842%09red/K12843%09red/K12869%09red/K12828%09red/K12829%09red/K12873%09red/K12827%09red/K12824%09red/K12825%09red/K12822%09red/K12823%09red/K12820%09red/K12821%09r…
Galactose metabolism	KEGG PATHWAY	ko00052	44	63	0.6143	0.879595	transcript_HQ_BAB_transcript19505/f2p0/1420|transcript_HQ_SAB_transcript13726/f11p0/1986|transcript_HQ_BAB_transcript12551/f3p0/2281|transcript_HQ_BAB_transcript13125/f2p0/2216|transcript_HQ_BAB_transcript7377/f4p0/2900|transcript_HQ_SAB_transcript11954/f2p0/2135|transcript_HQ_BAB_transcript19797/f2p0/1344|transcript_HQ_SAB_transcript4637/f2p0/2970|transcript_HQ_SAB_transcript8919/f3p0/2413|trans…	http://www.genome.jp/kegg-bin/show_pathway?ko00052/K01193%09red/K01190%09red/K00850%09red/K01187%09red/K00963%09red/K01835%09red/K00844%09red/K18819%09red/K12309%09red/K01785%09red/K01784%09red/K12447%09red/K00011%09red/K06617%09red
mRNA surveillance pathway	KEGG PATHWAY	ko03015	113	162	0.650735	0.879595	transcript_HQ_SAB_transcript6815/f6p0/2618|transcript_HQ_BAB_transcript13328/f3p0/2185|transcript_HQ_SAB_transcript5026/f7p0/2844|transcript_HQ_SAB_transcript9267/f2p0/2368|transcript_HQ_BAB_transcript2793/f5p0/3730|transcript_HQ_SAB_transcript11038/f2p0/2198|transcript_HQ_SAB_transcript14278/f9p0/1888|transcript_HQ_SAB_transcript11231/f3p0/2183|transcript_HQ_BAB_transcript5209/f3p0/3266|transcri…	http://www.genome.jp/kegg-bin/show_pathway?ko03015/K03267%09red/K14328%09red/K14327%09red/K14326%09red/K14325%09red/K14324%09red/K06100%09red/K13171%09red/K12881%09red/K12882%09red/K12883%09red/K13025%09red/K15542%09red/K11583%09red/K14411%09red/K13126%09red/K03456%09red/K14962%09red/K13917%09red/K06269%09red/K12875%09red/K12812%09red/K12876%09red/K11584%09red/K04382%09red/K14396%09red/K14376%09r…
Limonene and pinene degradation	KEGG PATHWAY	ko00903	10	15	0.655836	0.879595	transcript_HQ_SAB_transcript12236/f2p0/2108|transcript_HQ_SAB_transcript5780/f2p0/2753|transcript_HQ_SAB_transcript13118/f3p0/2062|transcript_HQ_SAB_transcript15439/f3p0/1916|transcript_HQ_SAB_transcript13984/f3p0/1985|transcript_HQ_SAB_transcript16373/f2p0/1856|transcript_HQ_BAB_transcript17612/f11p0/1713|transcript_HQ_BAB_transcript15183/f9p0/1922|transcript_HQ_BAB_transcript17459/f2p0/1742|tra…	http://www.genome.jp/kegg-bin/show_pathway?ko00903/K00128%09red/K00517%09red
Diterpenoid biosynthesis	KEGG PATHWAY	ko00904	10	15	0.655836	0.879595	transcript_HQ_SAB_transcript14395/f5p0/1955|transcript_HQ_BAB_transcript13150/f2p0/2203|transcript_HQ_SAB_transcript17619/f4p0/1668|transcript_HQ_SAB_transcript21653/f2p0/1524|transcript_HQ_BAB_transcript8035/f2p0/2811|transcript_HQ_BAB_transcript13503/f2p0/2170|transcript_HQ_BAB_transcript6448/f2p0/3021|transcript_HQ_BAB_transcript7155/f2p0/2925|transcript_HQ_SAB_transcript15669/f2p0/1887|transc…	http://www.genome.jp/kegg-bin/show_pathway?ko00904/K17982%09red/K04125%09red/K04121%09red/K04122%09red/K17961%09red
Biotin metabolism	KEGG PATHWAY	ko00780	8	12	0.655968	0.879595	transcript_HQ_BAB_transcript15488/f2p0/1996|transcript_HQ_BAB_transcript16935/f2p0/1825|transcript_HQ_SAB_transcript21784/f2p0/1522|transcript_HQ_BAB_transcript15344/f3p0/1994|transcript_HQ_BAB_transcript9178/f2p0/2672|transcript_HQ_SAB_transcript24819/f4p0/1297|transcript_HQ_SAB_transcript7451/f3p0/2590|transcript_HQ_SAB_transcript16963/f2p0/1807	http://www.genome.jp/kegg-bin/show_pathway?ko00780/K01942%09red/K01012%09red/K00059%09red/K09458%09red
Selenocompound metabolism	KEGG PATHWAY	ko00450	36	53	0.659549	0.879595	transcript_HQ_SAB_transcript5302/f2p0/2838|transcript_HQ_SAB_transcript30394/f2p0/860|transcript_HQ_BAB_transcript15546/f2p0/1964|transcript_HQ_BAB_transcript10643/f3p0/2476|transcript_HQ_SAB_transcript7245/f2p0/2615|transcript_HQ_SAB_transcript4815/f2p0/2921|transcript_HQ_SAB_transcript19284/f2p0/1666|transcript_HQ_BAB_transcript19258/f5p0/1440|transcript_HQ_BAB_transcript7810/f8p0/2825|transcri…	http://www.genome.jp/kegg-bin/show_pathway?ko00450/K11717%09red/K00384%09red/K13811%09red/K01874%09red/K08247%09red/K01761%09red/K01739%09red/K00549%09red
Glutathione metabolism	KEGG PATHWAY	ko00480	66	96	0.662125	0.879595	transcript_HQ_SAB_transcript26375/f9p0/1152|transcript_HQ_SAB_transcript30754/f5p0/798|transcript_HQ_BAB_transcript20282/f2p0/1118|transcript_HQ_SAB_transcript13232/f2p0/2033|transcript_HQ_BAB_transcript12236/f2p0/2305|transcript_HQ_SAB_transcript8626/f2p0/2429|transcript_HQ_SAB_transcript15397/f2p0/1894|transcript_HQ_SAB_transcript24846/f2p0/1315|transcript_HQ_SAB_transcript27343/f4p0/1067|trans…	http://www.genome.jp/kegg-bin/show_pathway?ko00480/K10808%09red/K01255%09red/K01256%09red/K00432%09red/K18592%09red/K00797%09red/K00799%09red/K00383%09red/K00036%09red/K01919%09red/K00033%09red/K00434%09red/K00031%09red
Synthesis and degradation of ketone bodies	KEGG PATHWAY	ko00072	4	6	0.667996	0.879595	transcript_HQ_SAB_transcript15827/f3p0/1847|transcript_HQ_BAB_transcript17826/f2p0/1683|transcript_HQ_SAB_transcript18036/f7p0/1739|transcript_HQ_SAB_transcript13177/f2p0/2030	http://www.genome.jp/kegg-bin/show_pathway?ko00072/K01641%09red/K00626%09red
Ascorbate and aldarate metabolism	KEGG PATHWAY	ko00053	46	68	0.677957	0.879595	transcript_HQ_SAB_transcript13118/f3p0/2062|transcript_HQ_BAB_transcript20282/f2p0/1118|transcript_HQ_BAB_transcript20191/f4p0/1163|transcript_HQ_SAB_transcript22817/f2p0/1445|transcript_HQ_SAB_transcript13984/f3p0/1985|transcript_HQ_BAB_transcript15378/f4p0/1893|transcript_HQ_SAB_transcript19183/f2p0/1691|transcript_HQ_BAB_transcript20118/f4p0/1181|transcript_HQ_SAB_transcript13841/f2p0/1995|tra…	http://www.genome.jp/kegg-bin/show_pathway?ko00053/K10046%09red/K14190%09red/K08232%09red/K12447%09red/K00128%09red/K14085%09red/K00012%09red/K00469%09red/K10047%09red/K00434%09red
Lysine biosynthesis	KEGG PATHWAY	ko00300	9	14	0.686497	0.879595	transcript_HQ_BAB_transcript5935/f2p0/3113|transcript_HQ_SAB_transcript15000/f4p0/1942|transcript_HQ_SAB_transcript12993/f3p0/2085|transcript_HQ_BAB_transcript12749/f2p0/2248|transcript_HQ_BAB_transcript4915/f3p0/3313|transcript_HQ_BAB_transcript19694/f2p0/1375|transcript_HQ_SAB_transcript3457/f10p0/3156|transcript_HQ_SAB_transcript20973/f2p0/1556|transcript_HQ_BAB_transcript17089/f4p0/1776	http://www.genome.jp/kegg-bin/show_pathway?ko00300/K00928%09red/K01778%09red/K12524%09red/K10206%09red/K14085%09red
Monobactam biosynthesis	KEGG PATHWAY	ko00261	7	11	0.69141	0.879595	transcript_HQ_SAB_transcript8352/f4p0/2459|transcript_HQ_SAB_transcript14876/f8p0/1865|transcript_HQ_BAB_transcript15124/f2p0/1991|transcript_HQ_BAB_transcript10643/f3p0/2476|transcript_HQ_BAB_transcript12749/f2p0/2248|transcript_HQ_BAB_transcript4915/f3p0/3313|transcript_HQ_SAB_transcript3457/f10p0/3156	http://www.genome.jp/kegg-bin/show_pathway?ko00261/K00928%09red/K13811%09red/K12524%09red
RNA transport	KEGG PATHWAY	ko03013	182	262	0.695034	0.879595	transcript_HQ_BAB_transcript7521/f13p0/2837|transcript_HQ_BAB_transcript7754/f3p0/2852|transcript_HQ_SAB_transcript2046/f3p0/3556|transcript_HQ_SAB_transcript2281/f2p0/3467|transcript_HQ_BAB_transcript11791/f2p0/2406|transcript_HQ_BAB_transcript4308/f2p0/3405|transcript_HQ_BAB_transcript16811/f4p0/1820|transcript_HQ_BAB_transcript17159/f3p0/1774|transcript_HQ_BAB_transcript13684/f2p0/2152|transcr…	http://www.genome.jp/kegg-bin/show_pathway?ko03013/K09291%09red/K14300%09red/K14307%09red/K14309%09red/K14314%09red/K10577%09red/K14315%09red/K18213%09red/K12160%09red/K14301%09red/K03231%09red/K03242%09red/K03243%09red/K03262%09red/K14304%09red/K03260%09red/K14306%09red/K03248%09red/K03249%09red/K03238%09red/K14327%09red/K14326%09red/K14325%09red/K14324%09red/K14303%09red/K14319%09red/K03245%09r…
Homologous recombination	KEGG PATHWAY	ko03440	16	25	0.70742	0.879595	transcript_HQ_SAB_transcript31122/f2p0/753|transcript_HQ_SAB_transcript2748/f3p0/3344|transcript_HQ_SAB_transcript2152/f2p0/3562|transcript_HQ_BAB_transcript419/f2p0/4940|transcript_HQ_BAB_transcript1464/f4p0/4109|transcript_HQ_BAB_transcript1478/f6p0/4114|transcript_HQ_SAB_transcript17948/f3p0/1666|transcript_HQ_SAB_transcript32520/f3p0/545|transcript_HQ_BAB_transcript3944/f4p0/3472|transcript_H…	http://www.genome.jp/kegg-bin/show_pathway?ko03440/K10881%09red/K07466%09red/K03553%09red/K10875%09red/K03655%09red/K02335%09red
ABC transporters	KEGG PATHWAY	ko02010	18	28	0.707568	0.879595	transcript_HQ_BAB_transcript440/f5p0/4890|transcript_HQ_SAB_transcript21613/f2p0/1503|transcript_HQ_BAB_transcript2303/f2p0/3883|transcript_HQ_BAB_transcript352/f2p0/5021|transcript_HQ_BAB_transcript8275/f2p0/2788|transcript_HQ_BAB_transcript399/f3p0/4953|transcript_HQ_BAB_transcript9794/f2p0/2602|transcript_HQ_BAB_transcript1264/f2p0/4228|transcript_HQ_SAB_transcript674/f2p0/4248|transcript_HQ_S…	http://www.genome.jp/kegg-bin/show_pathway?ko02010/K05656%09red/K05658%09red/K05666%09red/K05663%09red
RNA degradation	KEGG PATHWAY	ko03018	93	137	0.714962	0.879595	transcript_HQ_BAB_transcript5662/f2p0/3151|transcript_HQ_BAB_transcript1925/f2p0/3980|transcript_HQ_SAB_transcript7503/f2p0/2556|transcript_HQ_BAB_transcript882/f15p0/4431|transcript_HQ_SAB_transcript13032/f2p0/2063|transcript_HQ_SAB_transcript23055/f7p0/1400|transcript_HQ_SAB_transcript7217/f2p0/2599|transcript_HQ_BAB_transcript13310/f3p0/2204|transcript_HQ_BAB_transcript828/f4p0/4488|transcript…	http://www.genome.jp/kegg-bin/show_pathway?ko03018/K03679%09red/K00850%09red/K12600%09red/K01689%09red/K12614%09red/K12617%09red/K12616%09red/K12593%09red/K12619%09red/K12598%09red/K12599%09red/K13126%09red/K00962%09red/K12585%09red/K12607%09red/K12604%09red/K12605%09red/K12581%09red/K12603%09red/K12626%09red/K12608%09red/K14442%09red/K12606%09red/K12623%09red/K04077%09red/K12580%09red
Basal transcription factors	KEGG PATHWAY	ko03022	32	49	0.717435	0.879595	transcript_HQ_SAB_transcript6904/f2p0/2623|transcript_HQ_BAB_transcript16701/f3p0/1833|transcript_HQ_BAB_transcript5864/f4p0/3100|transcript_HQ_SAB_transcript2928/f4p0/3292|transcript_HQ_BAB_transcript10469/f2p0/2520|transcript_HQ_BAB_transcript17115/f2p0/1781|transcript_HQ_BAB_transcript6813/f3p0/2999|transcript_HQ_BAB_transcript10872/f2p0/2484|transcript_HQ_SAB_transcript27529/f2p0/1099|transcr…	http://www.genome.jp/kegg-bin/show_pathway?ko03022/K10843%09red/K03141%09red/K10844%09red/K03142%09red/K03128%09red/K03136%09red/K03124%09red/K03126%09red/K03120%09red/K03130%09red/K03122%09red/K03137%09red/K03129%09red/K02202%09red/K03133%09red
Arachidonic acid metabolism	KEGG PATHWAY	ko00590	8	13	0.718973	0.879595	transcript_HQ_SAB_transcript15228/f5p0/1885|transcript_HQ_SAB_transcript9182/f14p0/2333|transcript_HQ_BAB_transcript12236/f2p0/2305|transcript_HQ_SAB_transcript10697/f13p0/2206|transcript_HQ_SAB_transcript1543/f3p0/3726|transcript_HQ_SAB_transcript28195/f17p0/985|transcript_HQ_SAB_transcript11259/f2p0/2185|transcript_HQ_BAB_transcript12831/f7p0/2214	http://www.genome.jp/kegg-bin/show_pathway?ko00590/K00432%09red/K01254%09red/K07418%09red/K18592%09red/K14674%09red
Aminoacyl-tRNA biosynthesis	KEGG PATHWAY	ko00970	70	106	0.755802	0.914918	transcript_HQ_BAB_transcript2934/f4p0/3689|transcript_HQ_BAB_transcript4703/f2p0/3325|transcript_HQ_BAB_transcript4167/f2p0/3445|transcript_HQ_SAB_transcript12259/f3p0/2111|transcript_HQ_SAB_transcript11471/f3p0/2201|transcript_HQ_BAB_transcript7794/f4p0/2829|transcript_HQ_BAB_transcript4565/f3p0/3362|transcript_HQ_BAB_transcript3080/f4p0/3655|transcript_HQ_SAB_transcript4815/f2p0/2921|transcript…	http://www.genome.jp/kegg-bin/show_pathway?ko00970/K04567%09red/K01867%09red/K02434%09red/K01875%09red/K01876%09red/K01872%09red/K01880%09red/K01870%09red/K01873%09red/K01883%09red/K01866%09red/K01874%09red/K01886%09red/K01887%09red/K01889%09red/K01868%09red/K01869%09red/K01892%09red/K01885%09red
Lysine degradation	KEGG PATHWAY	ko00310	24	39	0.777383	0.93124	transcript_HQ_SAB_transcript13118/f3p0/2062|transcript_HQ_SAB_transcript18036/f7p0/1739|transcript_HQ_SAB_transcript13984/f3p0/1985|transcript_HQ_BAB_transcript17089/f4p0/1776|transcript_HQ_SAB_transcript12236/f2p0/2108|transcript_HQ_SAB_transcript15439/f3p0/1916|transcript_HQ_SAB_transcript16769/f2p0/1878|transcript_HQ_BAB_transcript15183/f9p0/1922|transcript_HQ_BAB_transcript17612/f11p0/1713|tr…	http://www.genome.jp/kegg-bin/show_pathway?ko00310/K00658%09red/K11433%09red/K00164%09red/K14085%09red/K00128%09red/K11420%09red/K14157%09red/K00626%09red
Sulfur relay system	KEGG PATHWAY	ko04122	3	6	0.805025	0.944869	transcript_HQ_BAB_transcript16466/f3p0/1865|transcript_HQ_SAB_transcript15935/f2p0/1860|transcript_HQ_SAB_transcript16208/f2p0/1884	http://www.genome.jp/kegg-bin/show_pathway?ko04122/K14169%09red/K01011%09red
Nucleotide excision repair	KEGG PATHWAY	ko03420	37	60	0.812076	0.944869	transcript_HQ_SAB_transcript31122/f2p0/753|transcript_HQ_BAB_transcript7658/f2p0/2856|transcript_HQ_BAB_transcript1478/f6p0/4114|transcript_HQ_SAB_transcript1466/f4p0/3768|transcript_HQ_SAB_transcript6904/f2p0/2623|transcript_HQ_BAB_transcript10469/f2p0/2520|transcript_HQ_BAB_transcript12779/f3p0/2236|transcript_HQ_SAB_transcript328/f3p0/4738|transcript_HQ_SAB_transcript25629/f3p0/1250|transcript…	http://www.genome.jp/kegg-bin/show_pathway?ko03420/K10754%09red/K10843%09red/K10747%09red/K10841%09red/K10846%09red/K10844%09red/K03142%09red/K07466%09red/K03141%09red/K10839%09red/K10838%09red/K04802%09red/K10140%09red/K10848%09red/K02335%09red/K10610%09red/K02202%09red
Base excision repair	KEGG PATHWAY	ko03410	13	23	0.813409	0.944869	transcript_HQ_SAB_transcript25629/f3p0/1250|transcript_HQ_BAB_transcript3909/f2p0/3507|transcript_HQ_SAB_transcript5291/f2p0/2849|transcript_HQ_BAB_transcript1478/f6p0/4114|transcript_HQ_SAB_transcript20375/f2p0/1600|transcript_HQ_SAB_transcript28223/f2p0/1042|transcript_HQ_SAB_transcript2163/f2p0/3517|transcript_HQ_BAB_transcript16465/f2p0/1864|transcript_HQ_BAB_transcript6924/f2p0/2965|transcri…	http://www.genome.jp/kegg-bin/show_pathway?ko03410/K10747%09red/K10773%09red/K01246%09red/K01247%09red/K10798%09red/K04802%09red/K02335%09red/K10803%09red/K10801%09red
Cell cycle - Caulobacter	KEGG PATHWAY	ko04112	14	25	0.826832	0.950857	transcript_HQ_BAB_transcript16505/f2p0/1853|transcript_HQ_SAB_transcript23083/f4p0/1435|transcript_HQ_SAB_transcript19478/f3p0/1647|transcript_HQ_BAB_transcript20004/f2p0/1254|transcript_HQ_BAB_transcript11413/f2p0/2388|transcript_HQ_SAB_transcript22619/f3p0/1457|transcript_HQ_SAB_transcript24866/f2p0/1315|transcript_HQ_SAB_transcript21855/f3p0/1505|transcript_HQ_SAB_transcript15393/f2p0/1909|tra…	http://www.genome.jp/kegg-bin/show_pathway?ko04112/K01358%09red/K01338%09red/K03531%09red/K03544%09red
Purine metabolism	KEGG PATHWAY	ko00230	125	193	0.856097	0.967721	transcript_HQ_SAB_transcript27984/f2p0/1071|transcript_HQ_BAB_transcript359/f2p0/5030|transcript_HQ_SAB_transcript3614/f2p0/3154|transcript_HQ_SAB_transcript20801/f4p0/1558|transcript_HQ_SAB_transcript21735/f8p0/1467|transcript_HQ_SAB_transcript31141/f5p0/734|transcript_HQ_SAB_transcript2280/f2p0/3480|transcript_HQ_SAB_transcript10040/f2p0/2346|transcript_HQ_SAB_transcript11906/f2p0/2157|transcri…	http://www.genome.jp/kegg-bin/show_pathway?ko00230/K00856%09red/K02083%09red/K00088%09red/K14977%09red/K03024%09red/K03006%09red/K01923%09red/K03005%09red/K03002%09red/K01939%09red/K00939%09red/K03027%09red/K00873%09red/K02335%09red/K01427%09red/K01933%09red/K03787%09red/K01835%09red/K01952%09red/K18151%09red/K01081%09red/K02999%09red/K01490%09red/K14721%09red/K01756%09red/K00962%09red/K13811%09r…
Glycosphingolipid biosynthesis - ganglio series	KEGG PATHWAY	ko00604	2	5	0.866741	0.967721	transcript_HQ_SAB_transcript9848/f2p0/2315|transcript_HQ_SAB_transcript8919/f3p0/2413	http://www.genome.jp/kegg-bin/show_pathway?ko00604/K12309%09red
Betalain biosynthesis	KEGG PATHWAY	ko00965	2	5	0.866741	0.967721	transcript_HQ_SAB_transcript25967/f13p0/1160|transcript_HQ_BAB_transcript20276/f2p0/1108	http://www.genome.jp/kegg-bin/show_pathway?ko00965/K15777%09red
Mismatch repair	KEGG PATHWAY	ko03430	13	26	0.898832	0.9939	transcript_HQ_SAB_transcript31122/f2p0/753|transcript_HQ_SAB_transcript25629/f3p0/1250|transcript_HQ_BAB_transcript2585/f2p0/3815|transcript_HQ_SAB_transcript5291/f2p0/2849|transcript_HQ_BAB_transcript1022/f2p0/4365|transcript_HQ_SAB_transcript7539/f2p0/2559|transcript_HQ_BAB_transcript988/f3p0/4356|transcript_HQ_SAB_transcript14724/f2p0/1954|transcript_HQ_BAB_transcript6924/f2p0/2965|transcript_…	http://www.genome.jp/kegg-bin/show_pathway?ko03430/K10747%09red/K10746%09red/K07456%09red/K07466%09red/K08739%09red/K10754%09red/K04802%09red/K08737%09red
DNA replication	KEGG PATHWAY	ko03030	11	24	0.928049	0.994414	transcript_HQ_SAB_transcript31122/f2p0/753|transcript_HQ_SAB_transcript25629/f3p0/1250|transcript_HQ_SAB_transcript5291/f2p0/2849|transcript_HQ_BAB_transcript1478/f6p0/4114|transcript_HQ_SAB_transcript7539/f2p0/2559|transcript_HQ_BAB_transcript7472/f8p0/2888|transcript_HQ_BAB_transcript4635/f6p0/3320|transcript_HQ_BAB_transcript6924/f2p0/2965|transcript_HQ_SAB_transcript9229/f6p0/2366|transcript_…	http://www.genome.jp/kegg-bin/show_pathway?ko03030/K10747%09red/K07466%09red/K10754%09red/K04802%09red/K02540%09red/K02542%09red/K02335%09red
Pyrimidine metabolism	KEGG PATHWAY	ko00240	66	114	0.940334	0.994414	transcript_HQ_SAB_transcript27984/f2p0/1071|transcript_HQ_BAB_transcript359/f2p0/5030|transcript_HQ_BAB_transcript14387/f2p0/2070|transcript_HQ_SAB_transcript30394/f2p0/860|transcript_HQ_SAB_transcript11168/f2p0/2193|transcript_HQ_BAB_transcript6933/f3p0/2950|transcript_HQ_SAB_transcript17025/f2p0/1807|transcript_HQ_BAB_transcript1478/f6p0/4114|transcript_HQ_SAB_transcript28786/f2p0/1039|transcri…	http://www.genome.jp/kegg-bin/show_pathway?ko00240/K03006%09red/K00761%09red/K03024%09red/K03027%09red/K02335%09red/K01937%09red/K00876%09red/K13800%09red/K03787%09red/K01956%09red/K01955%09red/K01081%09red/K02999%09red/K14721%09red/K00962%09red/K03014%09red/K03010%09red/K03013%09red/K00940%09red/K03018%09red/K03002%09red/K00384%09red/K03005%09red/K01489%09red/K10808%09red/K13421%09red/K14641%09r…
Glycosaminoglycan degradation	KEGG PATHWAY	ko00531	4	12	0.953292	0.994414	transcript_HQ_SAB_transcript9848/f2p0/2315|transcript_HQ_SAB_transcript8919/f3p0/2413|transcript_HQ_BAB_transcript12994/f2p0/2219|transcript_HQ_SAB_transcript18748/f2p0/1692	http://www.genome.jp/kegg-bin/show_pathway?ko00531/K10532%09red/K07964%09red/K12309%09red
Non-homologous end-joining	KEGG PATHWAY	ko03450	1	5	0.962192	0.994414	transcript_HQ_BAB_transcript11951/f2p0/2349	http://www.genome.jp/kegg-bin/show_pathway?ko03450/K10884%09red
Other glycan degradation	KEGG PATHWAY	ko00511	7	19	0.964158	0.994414	transcript_HQ_SAB_transcript5077/f2p0/2868|transcript_HQ_BAB_transcript912/f2p0/4448|transcript_HQ_BAB_transcript2620/f2p0/3780|transcript_HQ_SAB_transcript8919/f3p0/2413|transcript_HQ_SAB_transcript1846/f2p0/3608|transcript_HQ_SAB_transcript9848/f2p0/2315|transcript_HQ_BAB_transcript2808/f3p0/3715	http://www.genome.jp/kegg-bin/show_pathway?ko00511/K12309%09red/K01190%09red/K01191%09red/K17108%09red
Ribosome biogenesis in eukaryotes	KEGG PATHWAY	ko03008	49	92	0.968988	0.994414	transcript_HQ_BAB_transcript5662/f2p0/3151|transcript_HQ_SAB_transcript3650/f2p0/3139|transcript_HQ_BAB_transcript1254/f7p0/4161|transcript_HQ_SAB_transcript18977/f2p0/1684|transcript_HQ_BAB_transcript13934/f2p0/2123|transcript_HQ_SAB_transcript3561/f2p0/3147|transcript_HQ_SAB_transcript5418/f2p0/2826|transcript_HQ_BAB_transcript4290/f2p0/3422|transcript_HQ_BAB_transcript3090/f6p0/3632|transcript…	http://www.genome.jp/kegg-bin/show_pathway?ko03008/K11108%09red/K11128%09red/K12619%09red/K14572%09red/K14570%09red/K14571%09red/K14574%09red/K14554%09red/K14555%09red/K14556%09red/K14557%09red/K14550%09red/K14552%09red/K14553%09red/K07936%09red/K14538%09red/K14539%09red/K14536%09red/K07178%09red/K07179%09red/K03097%09red/K01164%09red/K07562%09red/K03115%09red/K14563%09red/K14548%09red/K14565%09r…
Photosynthesis	KEGG PATHWAY	ko00195	51	101	0.987483	0.994414	transcript_HQ_SAB_transcript30933/f85p0/683|transcript_HQ_SAB_transcript31629/f5p0/662|transcript_HQ_SAB_transcript28307/f3p0/1054|transcript_HQ_SAB_transcript29174/f2p0/951|transcript_HQ_BAB_transcript19708/f4p0/1317|transcript_HQ_BAB_transcript11353/f2p0/2415|transcript_HQ_SAB_transcript30915/f2p0/781|transcript_HQ_BAB_transcript20502/f3p0/899|transcript_HQ_SAB_transcript27778/f2p0/1085|transcr…	http://www.genome.jp/kegg-bin/show_pathway?ko00195/K02694%09red/K02717%09red/K02692%09red/K02641%09red/K02115%09red/K02693%09red/K02705%09red/K02698%09red/K02699%09red/K02723%09red/K02111%09red/K02636%09red/K03542%09red/K03541%09red/K02716%09red/K08906%09red/K02638%09red/K02639%09red/K08902%09red/K14332%09red/K08901%09red
RNA polymerase	KEGG PATHWAY	ko03020	18	44	0.987836	0.994414	transcript_HQ_SAB_transcript27984/f2p0/1071|transcript_HQ_BAB_transcript359/f2p0/5030|transcript_HQ_SAB_transcript514/f2p0/4490|transcript_HQ_BAB_transcript58/f2p0/6074|transcript_HQ_BAB_transcript14387/f2p0/2070|transcript_HQ_SAB_transcript2616/f2p0/3361|transcript_HQ_BAB_transcript12803/f2p0/2240|transcript_HQ_BAB_transcript9259/f5p0/2605|transcript_HQ_SAB_transcript31141/f5p0/734|transcript_HQ…	http://www.genome.jp/kegg-bin/show_pathway?ko03020/K03006%09red/K03014%09red/K03005%09red/K03002%09red/K03010%09red/K03013%09red/K03027%09red/K03024%09red/K02999%09red/K03018%09red/K14721%09red
Glycosylphosphatidylinositol(GPI)-anchor biosynthesis	KEGG PATHWAY	ko00563	5	18	0.988426	0.994414	transcript_HQ_BAB_transcript4013/f3p0/3466|transcript_HQ_BAB_transcript17407/f2p0/1751|transcript_HQ_BAB_transcript8163/f2p0/2797|transcript_HQ_BAB_transcript5925/f3p0/3141|transcript_HQ_SAB_transcript8040/f2p0/2500	http://www.genome.jp/kegg-bin/show_pathway?ko00563/K05310%09red/K07542%09red/K03860%09red/K05283%09red/K05292%09red
Ribosome	KEGG PATHWAY	ko03010	124	224	0.994336	0.994414	transcript_HQ_BAB_transcript20202/f9p0/1149|transcript_HQ_SAB_transcript31453/f7p0/708|transcript_HQ_SAB_transcript30367/f4p0/815|transcript_HQ_SAB_transcript26782/f4p0/1157|transcript_HQ_SAB_transcript33012/f4p0/423|transcript_HQ_BAB_transcript20016/f5p0/1187|transcript_HQ_SAB_transcript26602/f2p0/1172|transcript_HQ_BAB_transcript17814/f4p0/1696|transcript_HQ_SAB_transcript32611/f2p0/466|transcr…	http://www.genome.jp/kegg-bin/show_pathway?ko03010/K02909%09red/K02871%09red/K02917%09red/K02937%09red/K02941%09red/K02883%09red/K02925%09red/K02931%09red/K02930%09red/K02955%09red/K02918%09red/K02953%09red/K02866%09red/K02865%09red/K02864%09red/K02884%09red/K02910%09red/K02881%09red/K02915%09red/K02882%09red/K02993%09red/K02991%09red/K02990%09red/K02997%09red/K02996%09red/K02995%09red/K02957%09r…
Oxidative phosphorylation	KEGG PATHWAY	ko00190	95	178	0.994414	0.994414	transcript_HQ_BAB_transcript3243/f2p0/3621|transcript_HQ_BAB_transcript786/f3p0/4523|transcript_HQ_SAB_transcript29256/f2p0/952|transcript_HQ_SAB_transcript2932/f2p0/3297|transcript_HQ_SAB_transcript24619/f4p0/1305|transcript_HQ_BAB_transcript20396/f3p0/1020|transcript_HQ_SAB_transcript31897/f2p0/647|transcript_HQ_SAB_transcript26875/f4p0/1147|transcript_HQ_SAB_transcript30746/f2p0/748|transcript…	http://www.genome.jp/kegg-bin/show_pathway?ko00190/K02111%09red/K02257%09red/K02115%09red/K01507%09red/K02258%09red/K02138%09red/K02261%09red/K02133%09red/K02154%09red/K02153%09red/K02134%09red/K02151%09red/K02136%09red/K03943%09red/K03941%09red/K03940%09red/K03946%09red/K03945%09red/K02152%09red/K02137%09red/K02150%09red/K03881%09red/K03661%09red/K01535%09red/K02144%09red/K02145%09red/K02146%09r…
