# Supplementary material for: Characterization of the gene expression profile response to drought stress in Haloxylon using PacBio single-molecule real-time and Illumina sequencing
Source: Front Plant Sci. 2022 Aug 16;13:981029. doi: 10.3389/fpls.2022.981029 (PMC9424927; doi:10.3389/fpls.2022.981029)
Supplement: Supplementary file 4 [file Table_4.XLSX]

## Sheet: LS vs. HS
Table S2 DEGs related to drought signals in Haloxylon ammodendron
Gene_id	pval	padj	{nr}	{SwissProt}	{KEGG}	{KOG}	{GO}	{nt}	{pfam}
transcript_HQ_SAB_transcript24360/f2p0/1309	0.01805	0.033624	{KMT12295.1; hypothetical protein BVRB_5g102360 [Beta vulgaris subsp. vulgaris]}	{sp|Q949P1|ABAH1_ARATH; Abscisic acid 8'-hydroxylase 1 OS=Arabidopsis thaliana GN=CYP707A1 PE=2 SV=1}	{bvg:104892458; K09843 E1.14.13.93 (+)-abscisic acid 8'-hydroxylase 1.14.13.93 ko00906; Metabolism; Metabolism of terpenoids and polyketides; Carotenoid biosynthesis}	{At4g19230; KOG0157 Cytochrome P450 CYP4/CYP19/CYP26 subfamilies QI Secondary metabolites biosynthesis, transport and catabolism ; Lipid transport and metabolism ;}	{GO:0055114; oxidation-reduction process; biological_process GO:0016705; oxidoreductase activity, acting on paired donors, with incorporation or reduction of molecular oxygen; molecular_function GO:0005506; iron ion binding; molecular_function GO:0020037; heme binding; molecular_function}	{XM_010678400.2; PREDICTED: Beta vulgaris subsp. vulgaris abscisic acid 8'-hydroxylase 1-like (LOC104892458), mRNA}	{PF00067:Cytochrome P450}
transcript_HQ_SAB_transcript11844/f14p0/2122	1.6262e-102	4.8055e-101	{XP_010676702.1; PREDICTED: abscisic acid 8'-hydroxylase 1-like [Beta vulgaris subsp. vulgaris]}	{sp|Q949P1|ABAH1_ARATH; Abscisic acid 8'-hydroxylase 1 OS=Arabidopsis thaliana GN=CYP707A1 PE=2 SV=1}	{bvg:104892458; K09843 E1.14.13.93 (+)-abscisic acid 8'-hydroxylase 1.14.13.93 ko00906; Metabolism; Metabolism of terpenoids and polyketides; Carotenoid biosynthesis}	{At5g45340; KOG0157 Cytochrome P450 CYP4/CYP19/CYP26 subfamilies QI Secondary metabolites biosynthesis, transport and catabolism ; Lipid transport and metabolism ;}	{GO:0005506; iron ion binding; molecular_function GO:0020037; heme binding; molecular_function GO:0016705; oxidoreductase activity, acting on paired donors, with incorporation or reduction of molecular oxygen; molecular_function GO:0055114; oxidation-reduction process; biological_process}	{XM_010678400.2; PREDICTED: Beta vulgaris subsp. vulgaris abscisic acid 8'-hydroxylase 1-like (LOC104892458), mRNA}	{PF00067:Cytochrome P450}
transcript_HQ_SAB_transcript26530/f6p0/1153	6.6311e-16	3.6888e-15	{KNA13133.1; hypothetical protein SOVF_119530 [Spinacia oleracea]}	{sp|Q84MC7|PYL9_ARATH; Abscisic acid receptor PYL9 OS=Arabidopsis thaliana GN=PYL9 PE=1 SV=1}	{bvg:104886203; K14496 PYL abscisic acid receptor PYR/PYL family - ko04016; Environmental Information Processing; Signal transduction; MAPK signaling pathway - plant | ko04075; Environmental Information Processing; Signal transduction; Plant hormone signal transduction}	{NA}	{GO:0009607; response to biotic stimulus; biological_process GO:0006952; defense response; biological_process}	{XM_010097482.1; Morus notabilis hypothetical protein partial mRNA}	{PF00407:Pathogenesis-related protein Bet v I family}
transcript_HQ_SAB_transcript23012/f3p0/1427	8.7158e-06	2.5512e-05	{XP_010671508.1; PREDICTED: abscisic acid receptor PYL8 [Beta vulgaris subsp. vulgaris]}	{sp|Q9FGM1|PYL8_ARATH; Abscisic acid receptor PYL8 OS=Arabidopsis thaliana GN=PYL8 PE=1 SV=1}	{bvg:104888286; K14496 PYL abscisic acid receptor PYR/PYL family - ko04016; Environmental Information Processing; Signal transduction; MAPK signaling pathway - plant | ko04075; Environmental Information Processing; Signal transduction; Plant hormone signal transduction}	{NA}	{NA}	{XM_010673206.2; PREDICTED: Beta vulgaris subsp. vulgaris abscisic acid receptor PYL8 (LOC104888286), mRNA}	{NA}
transcript_HQ_SAB_transcript25502/f3p0/1255	9.9309e-10	3.9596e-09	{XP_010687552.1; PREDICTED: uncharacterized protein LOC104901657 [Beta vulgaris subsp. vulgaris]}	{sp|Q8LGS1|MARD1_ARATH; Protein MARD1 OS=Arabidopsis thaliana GN=MARD1 PE=2 SV=2}	{vvi:100264520; - - - - -}	{NA}	{NA}	{XM_010689250.2; PREDICTED: Beta vulgaris subsp. vulgaris hypothetical protein (LOC104901657), mRNA}	{NA}
transcript_HQ_SAB_transcript8234/f2p0/2492	0.00011557	0.00029862	{KNA11963.1; hypothetical protein SOVF_130220 [Spinacia oleracea]}	{sp|Q9LRR7|NCED3_ARATH; 9-cis-epoxycarotenoid dioxygenase NCED3, chloroplastic OS=Arabidopsis thaliana GN=NCED3 PE=2 SV=1}	{cann:107852027; - - - - -}	{At3g14440; KOG1285 Beta, beta-carotene 15,15'-dioxygenase and related enzymes Q Secondary metabolites biosynthesis, transport and catabolism ;}	{GO:0009898; internal side of plasma membrane; cellular_component GO:0016702; oxidoreductase activity, acting on single donors with incorporation of molecular oxygen, incorporation of two atoms of oxygen; molecular_function GO:0016020; membrane; cellular_component GO:0055114; oxidation-reduction process; biological_process}	{AY466118.1; Gentiana lutea 9-cis-epoxycarotenoid dioxygenase (NCED2) mRNA, complete cds}	{PF07348:Syd protein (SUKH-2) PF03055:Retinal pigment epithelial membrane protein PF01299:Lysosome-associated membrane glycoprotein (Lamp)}
transcript_HQ_SAB_transcript11340/f2p0/2204	3.883e-13	1.9022e-12	{XP_010666721.1; PREDICTED: probable 9-cis-epoxycarotenoid dioxygenase NCED5, chloroplastic [Beta vulgaris subsp. vulgaris]}	{sp|Q9M6E8|NCED1_PHAVU; 9-cis-epoxycarotenoid dioxygenase NCED1, chloroplastic OS=Phaseolus vulgaris GN=NCED1 PE=2 SV=1}	{jcu:105634001; K09840 NCED 9-cis-epoxycarotenoid dioxygenase 1.13.11.51 ko00906; Metabolism; Metabolism of terpenoids and polyketides; Carotenoid biosynthesis}	{At3g14440; KOG1285 Beta, beta-carotene 15,15'-dioxygenase and related enzymes Q Secondary metabolites biosynthesis, transport and catabolism ;}	{GO:0055114; oxidation-reduction process; biological_process GO:0016702; oxidoreductase activity, acting on single donors with incorporation of molecular oxygen, incorporation of two atoms of oxygen; molecular_function}	{HM156274.1; Solanum chilense isolate 101A 9-cis-epoxycarotenoid dioxygenase (NCED1) gene, partial cds}	{PF03055:Retinal pigment epithelial membrane protein}
transcript_HQ_BAB_transcript14390/f2p0/2070	5.6865e-17	3.3235e-16	{KNA23039.1; hypothetical protein SOVF_028540 [Spinacia oleracea]}	{sp|O49675|CCD4_ARATH; Probable carotenoid cleavage dioxygenase 4, chloroplastic OS=Arabidopsis thaliana GN=CCD4 PE=1 SV=1}	{bvg:104893046; K09840 NCED 9-cis-epoxycarotenoid dioxygenase 1.13.11.51 ko00906; Metabolism; Metabolism of terpenoids and polyketides; Carotenoid biosynthesis}	{At4g19170; KOG1285 Beta, beta-carotene 15,15'-dioxygenase and related enzymes Q Secondary metabolites biosynthesis, transport and catabolism ;}	{GO:0055114; oxidation-reduction process; biological_process GO:0016702; oxidoreductase activity, acting on single donors with incorporation of molecular oxygen, incorporation of two atoms of oxygen; molecular_function}	{XM_010679092.2; PREDICTED: Beta vulgaris subsp. vulgaris probable carotenoid cleavage dioxygenase 4, chloroplastic (LOC104893046), mRNA}	{PF03055:Retinal pigment epithelial membrane protein}
transcript_HQ_BAB_transcript13096/f3p0/2229	2.5616e-12	1.1987e-11	{KNA11963.1; hypothetical protein SOVF_130220 [Spinacia oleracea]}	{sp|Q9LRR7|NCED3_ARATH; 9-cis-epoxycarotenoid dioxygenase NCED3, chloroplastic OS=Arabidopsis thaliana GN=NCED3 PE=2 SV=1}	{cann:107852027; - - - - -}	{At3g14440; KOG1285 Beta, beta-carotene 15,15'-dioxygenase and related enzymes Q Secondary metabolites biosynthesis, transport and catabolism ;}	{GO:0006260; DNA replication; biological_process GO:0016702; oxidoreductase activity, acting on single donors with incorporation of molecular oxygen, incorporation of two atoms of oxygen; molecular_function GO:0055114; oxidation-reduction process; biological_process GO:0005634; nucleus; cellular_component GO:0009898; internal side of plasma membrane; cellular_component}	{XM_007213552.1; Prunus persica hypothetical protein (PRUPE_ppa002314mg) mRNA, complete cds}	{PF07348:Syd protein (SUKH-2) PF03055:Retinal pigment epithelial membrane protein PF09507:DNA polymerase subunit Cdc27}
transcript_HQ_SAB_transcript9339/f4p0/2361	1.9736e-15	1.0766e-14	{XP_010685523.1; PREDICTED: Probable protein phosphatase 2C 25 [Beta vulgaris subsp. vulgaris]}	{sp|Q9XEE8|P2C30_ARATH; Probable protein phosphatase 2C 30 OS=Arabidopsis thaliana GN=PP2C5 PE=2 SV=1}	{egr:104432633; - - - - -}	{At2g40180; KOG0698 Serine/threonine protein phosphatase T Signal transduction mechanisms ;}	{NA}	{XM_010687221.2; PREDICTED: Beta vulgaris subsp. vulgaris Probable protein phosphatase 2C 25 (LOC104899930), mRNA}	{NA}
transcript_HQ_SAB_transcript8715/f2p0/2426	1.8186e-06	5.6882e-06	{KNA09453.1; hypothetical protein SOVF_153500, partial [Spinacia oleracea]}	{sp|Q6J2K6|BIP2C_ORYSI; Probable protein phosphatase 2C BIPP2C1 OS=Oryza sativa subsp. indica GN=BIPP2C1 PE=2 SV=1}	{vvi:100262272; - - - - -}	{At4g33500_1; KOG1379 Serine/threonine protein phosphatase T Signal transduction mechanisms ;}	{GO:0003824; NA}	{XM_010668562.2; PREDICTED: Beta vulgaris subsp. vulgaris Probable protein phosphatase 2C 62 (LOC104883980), transcript variant X2, mRNA}	{PF07228:Stage II sporulation protein E (SpoIIE) PF00481:Protein phosphatase 2C}
transcript_HQ_SAB_transcript8627/f4p0/2428	0.02137	0.039194	{XP_010670734.1; PREDICTED: Probable protein phosphatase 2C 22 [Beta vulgaris subsp. vulgaris]}	{sp|Q9SLA1|P2C22_ARATH; Probable protein phosphatase 2C 22 OS=Arabidopsis thaliana GN=At2g25620 PE=2 SV=1}	{bvg:104887717; K14803 PTC2_3 protein phosphatase PTC2/3 3.1.3.16 -}	{At2g25620; KOG0698 Serine/threonine protein phosphatase T Signal transduction mechanisms ;}	{GO:0003824; NA}	{XM_010672432.2; PREDICTED: Beta vulgaris subsp. vulgaris Probable protein phosphatase 2C 22 (LOC104887717), mRNA}	{PF00481:Protein phosphatase 2C}
transcript_HQ_SAB_transcript8132/f2p0/2486	2.9704e-31	2.7538e-30	{XP_010685766.1; PREDICTED: Probable protein phosphatase 2C 23 [Beta vulgaris subsp. vulgaris]}	{sp|Q9ZV25|P2C23_ARATH; Probable protein phosphatase 2C 23 OS=Arabidopsis thaliana GN=PLL4 PE=2 SV=1}	{egr:104432739; - - - - -}	{At2g28890; KOG0700 Protein phosphatase 2C/pyruvate dehydrogenase (lipoamide) phosphatase T Signal transduction mechanisms ;}	{GO:0003824; NA}	{XM_010687464.2; PREDICTED: Beta vulgaris subsp. vulgaris Probable protein phosphatase 2C 23 (LOC104900119), mRNA}	{PF07228:Stage II sporulation protein E (SpoIIE) PF00481:Protein phosphatase 2C}
transcript_HQ_SAB_transcript6791/f2p0/2682	6.1641e-07	2.0111e-06	{KNA05523.1; hypothetical protein SOVF_189480 isoform A [Spinacia oleracea]}	{sp|Q93YS2|P2C51_ARATH; Probable protein phosphatase 2C 51 OS=Arabidopsis thaliana GN=At3g63340 PE=2 SV=2}	{csv:101210198; - - - - -}	{At3g63340_1; KOG0698 Serine/threonine protein phosphatase T Signal transduction mechanisms ;}	{GO:0003824; NA}	{NA}	{PF00481:Protein phosphatase 2C}
transcript_HQ_SAB_transcript6406/f2p0/2701	1.6974e-05	4.8254e-05	{XP_010685766.1; PREDICTED: Probable protein phosphatase 2C 23 [Beta vulgaris subsp. vulgaris]}	{sp|Q9ZV25|P2C23_ARATH; Probable protein phosphatase 2C 23 OS=Arabidopsis thaliana GN=PLL4 PE=2 SV=1}	{pper:PRUPE_ppa001966mg; - - - - -}	{At2g28890; KOG0700 Protein phosphatase 2C/pyruvate dehydrogenase (lipoamide) phosphatase T Signal transduction mechanisms ;}	{GO:0003824; NA}	{XM_010687464.2; PREDICTED: Beta vulgaris subsp. vulgaris Probable protein phosphatase 2C 23 (LOC104900119), mRNA}	{PF00481:Protein phosphatase 2C PF07228:Stage II sporulation protein E (SpoIIE)}
transcript_HQ_SAB_transcript6381/f5p0/2673	8.3851e-10	3.3604e-09	{XP_010690331.1; PREDICTED: Probable protein phosphatase 2C 60 [Beta vulgaris subsp. vulgaris]}	{sp|Q10S32|P2C28_ORYSJ; Probable protein phosphatase 2C 28 OS=Oryza sativa subsp. japonica GN=Os03g0137200 PE=2 SV=1}	{pper:PRUPE_ppa006747mg; K01102 PDP pyruvate dehydrogenase phosphatase 3.1.3.43 -}	{At4g38520; KOG0700 Protein phosphatase 2C/pyruvate dehydrogenase (lipoamide) phosphatase T Signal transduction mechanisms ;}	{GO:0003824; NA}	{XM_010692030.2; PREDICTED: Beta vulgaris subsp. vulgaris Probable protein phosphatase 2C 60 (LOC104903895), transcript variant X1, mRNA}	{PF07228:Stage II sporulation protein E (SpoIIE) PF00481:Protein phosphatase 2C}
transcript_HQ_SAB_transcript3325/f2p0/3214	9.1821e-06	2.6814e-05	{XP_010679444.1; PREDICTED: Probable protein phosphatase 2C 2 isoform X1 [Beta vulgaris subsp. vulgaris]}	{sp|Q9FYN7|P2C02_ORYSJ; Probable protein phosphatase 2C 2 OS=Oryza sativa subsp. japonica GN=Os01g0295700 PE=2 SV=1}	{bvg:104894812; K14803 PTC2_3 protein phosphatase PTC2/3 3.1.3.16 -}	{At3g62260; KOG0698 Serine/threonine protein phosphatase T Signal transduction mechanisms ;}	{GO:0003824; NA}	{XM_010681143.2; PREDICTED: Beta vulgaris subsp. vulgaris Probable protein phosphatase 2C 2 (LOC104894812), transcript variant X2, mRNA}	{PF00481:Protein phosphatase 2C}
transcript_HQ_SAB_transcript24189/f3p0/1384	1.4939e-11	6.6812e-11	{XP_010685523.1; PREDICTED: Probable protein phosphatase 2C 25 [Beta vulgaris subsp. vulgaris]}	{sp|O80871|P2C25_ARATH; Probable protein phosphatase 2C 25 OS=Arabidopsis thaliana GN=At2g30020 PE=1 SV=1}	{jcu:105639610; - - - - -}	{At2g30020; KOG0698 Serine/threonine protein phosphatase T Signal transduction mechanisms ;}	{GO:0003824; NA}	{XM_010687221.2; PREDICTED: Beta vulgaris subsp. vulgaris Probable protein phosphatase 2C 25 (LOC104899930), mRNA}	{PF00481:Protein phosphatase 2C PF07228:Stage II sporulation protein E (SpoIIE)}
transcript_HQ_SAB_transcript23963/f9p0/1354	4.3986e-11	1.9173e-10	{XP_010687769.1; PREDICTED: Probable protein phosphatase 2C 27 [Beta vulgaris subsp. vulgaris]}	{sp|Q69QZ0|P2C27_ORYSJ; Probable protein phosphatase 2C 27 OS=Oryza sativa subsp. japonica GN=Os02g0799000 PE=2 SV=1}	{rcu:8275709; K14803 PTC2_3 protein phosphatase PTC2/3 3.1.3.16 -}	{At2g25620; KOG0698 Serine/threonine protein phosphatase T Signal transduction mechanisms ;}	{GO:0003824; NA}	{XM_010689467.2; PREDICTED: Beta vulgaris subsp. vulgaris Probable protein phosphatase 2C 27 (LOC104901842), mRNA}	{PF00481:Protein phosphatase 2C}
transcript_HQ_SAB_transcript23074/f2p0/1385	0.016347	0.030712	{KNA13245.1; hypothetical protein SOVF_118530 [Spinacia oleracea]}	{sp|Q93YW5|P2C58_ARATH; Probable protein phosphatase 2C 58 OS=Arabidopsis thaliana GN=At4g28400 PE=2 SV=1}	{cit:102608973; - - - - -}	{At3g15260; KOG0698 Serine/threonine protein phosphatase T Signal transduction mechanisms ;}	{GO:0003824; NA}	{XM_010690757.2; PREDICTED: Beta vulgaris subsp. vulgaris Probable protein phosphatase 2C 39 (LOC104902838), mRNA}	{PF07228:Stage II sporulation protein E (SpoIIE) PF00481:Protein phosphatase 2C}
transcript_HQ_SAB_transcript22843/f4p0/1429	1.0774e-15	5.9463e-15	{KNA12988.1; hypothetical protein SOVF_120940 [Spinacia oleracea]}	{sp|Q0WRB2|P2C73_ARATH; Probable protein phosphatase 2C 73 OS=Arabidopsis thaliana GN=PPC6-7 PE=2 SV=1}	{bvg:104890346; - - - - -}	{At3g05640; KOG0698 Serine/threonine protein phosphatase T Signal transduction mechanisms ;}	{GO:0003824; NA}	{XM_010675790.2; PREDICTED: Beta vulgaris subsp. vulgaris Probable protein phosphatase 2C 34 (LOC104890346), mRNA}	{PF00481:Protein phosphatase 2C PF07228:Stage II sporulation protein E (SpoIIE)}
transcript_HQ_SAB_transcript22226/f3p0/1482	1.6025e-214	1.0714e-212	{XP_010666157.1; PREDICTED: Probable protein phosphatase 2C 2 [Beta vulgaris subsp. vulgaris]}	{sp|Q8RX37|P2C02_ARATH; Probable protein phosphatase 2C 2 OS=Arabidopsis thaliana GN=At1g07160 PE=2 SV=1}	{bvg:104883347; K17506 PPM1L, PP2CE protein phosphatase 1L 3.1.3.16 -}	{At1g07160; KOG0698 Serine/threonine protein phosphatase T Signal transduction mechanisms ;}	{GO:0003824; NA}	{XM_010667855.2; PREDICTED: Beta vulgaris subsp. vulgaris Probable protein phosphatase 2C 2 (LOC104883347), mRNA}	{PF00481:Protein phosphatase 2C}
transcript_HQ_SAB_transcript21068/f2p0/1551	0.0096462	0.018943	{XP_010670822.1; PREDICTED: Probable protein phosphatase 2C 60 [Beta vulgaris subsp. vulgaris]}	{sp|Q9SZ53|P2C60_ARATH; Probable protein phosphatase 2C 60 OS=Arabidopsis thaliana GN=At4g31860 PE=2 SV=1}	{bvg:104887778; K17499 PPM1G, PP2CG protein phosphatase 1G 3.1.3.16 -}	{At4g31860; KOG0698 Serine/threonine protein phosphatase T Signal transduction mechanisms ;}	{GO:0003824; NA}	{XM_010672520.2; PREDICTED: Beta vulgaris subsp. vulgaris Probable protein phosphatase 2C 60 (LOC104887778), mRNA}	{PF00481:Protein phosphatase 2C}
transcript_HQ_SAB_transcript21023/f2p0/1554	8.124e-22	5.6779e-21	{KNA12988.1; hypothetical protein SOVF_120940 [Spinacia oleracea]}	{sp|Q0WRB2|P2C73_ARATH; Probable protein phosphatase 2C 73 OS=Arabidopsis thaliana GN=PPC6-7 PE=2 SV=1}	{bvg:104890346; - - - - -}	{At3g05640; KOG0698 Serine/threonine protein phosphatase T Signal transduction mechanisms ;}	{GO:0003824; NA}	{XM_010675790.2; PREDICTED: Beta vulgaris subsp. vulgaris Probable protein phosphatase 2C 34 (LOC104890346), mRNA}	{PF00481:Protein phosphatase 2C PF07228:Stage II sporulation protein E (SpoIIE)}
transcript_HQ_SAB_transcript20599/f2p0/1584	2.344e-20	1.5569e-19	{XP_010685523.1; PREDICTED: Probable protein phosphatase 2C 25 [Beta vulgaris subsp. vulgaris]}	{sp|O80871|P2C25_ARATH; Probable protein phosphatase 2C 25 OS=Arabidopsis thaliana GN=At2g30020 PE=1 SV=1}	{cic:CICLE_v10028590mg; - - - - -}	{At2g30020; KOG0698 Serine/threonine protein phosphatase T Signal transduction mechanisms ;}	{GO:0003824; NA}	{XM_010687221.2; PREDICTED: Beta vulgaris subsp. vulgaris Probable protein phosphatase 2C 25 (LOC104899930), mRNA}	{PF00481:Protein phosphatase 2C}
transcript_HQ_SAB_transcript19020/f2p0/1695	4.5948e-06	1.3801e-05	{KNA17202.1; hypothetical protein SOVF_082280 [Spinacia oleracea]}	{sp|Q9LME4|P2C09_ARATH; Probable protein phosphatase 2C 9 OS=Arabidopsis thaliana GN=At1g22280 PE=1 SV=1}	{gmx:100801722; K17506 PPM1L, PP2CE protein phosphatase 1L 3.1.3.16 -}	{At1g34750; KOG0698 Serine/threonine protein phosphatase T Signal transduction mechanisms ;}	{GO:0003824; NA}	{XM_010692194.2; PREDICTED: Beta vulgaris subsp. vulgaris Probable protein phosphatase 2C 9 (LOC104904024), transcript variant X1, mRNA}	{PF07228:Stage II sporulation protein E (SpoIIE) PF00481:Protein phosphatase 2C}
transcript_HQ_SAB_transcript18064/f2p0/1748	2.0079e-08	7.3471e-08	{KNA15680.1; hypothetical protein SOVF_096010 [Spinacia oleracea]}	{sp|O81760|P2C63_ARATH; Probable protein phosphatase 2C 63 OS=Arabidopsis thaliana GN=At4g33920 PE=2 SV=1}	{jcu:105650748; - - - - -}	{At4g33920; KOG0700 Protein phosphatase 2C/pyruvate dehydrogenase (lipoamide) phosphatase T Signal transduction mechanisms ;}	{GO:0003824; NA}	{XM_010689202.2; PREDICTED: Beta vulgaris subsp. vulgaris Probable protein phosphatase 2C 63 (LOC104901613), mRNA}	{PF00481:Protein phosphatase 2C PF07228:Stage II sporulation protein E (SpoIIE)}
transcript_HQ_SAB_transcript17598/f20p0/1742	2.05e-44	2.5813e-43	{XP_010679444.1; PREDICTED: Probable protein phosphatase 2C 2 isoform X1 [Beta vulgaris subsp. vulgaris]}	{sp|Q9FYN7|P2C02_ORYSJ; Probable protein phosphatase 2C 2 OS=Oryza sativa subsp. japonica GN=Os01g0295700 PE=2 SV=1}	{bvg:104894812; K14803 PTC2_3 protein phosphatase PTC2/3 3.1.3.16 -}	{At3g62260; KOG0698 Serine/threonine protein phosphatase T Signal transduction mechanisms ;}	{GO:0003824; NA}	{XM_010681142.2; PREDICTED: Beta vulgaris subsp. vulgaris Probable protein phosphatase 2C 2 (LOC104894812), transcript variant X1, mRNA}	{PF00481:Protein phosphatase 2C}
transcript_HQ_SAB_transcript17294/f3p0/1788	5.5194e-24	4.1603e-23	{XP_010685683.1; PREDICTED: Probable protein phosphatase 2C 24 [Beta vulgaris subsp. vulgaris]}	{sp|Q9FIF5|P2C78_ARATH; Probable protein phosphatase 2C 78 OS=Arabidopsis thaliana GN=SAG113 PE=2 SV=1}	{jcu:105629918; K14497 PP2C protein phosphatase 2C 3.1.3.16 ko04016; Environmental Information Processing; Signal transduction; MAPK signaling pathway - plant | ko04075; Environmental Information Processing; Signal transduction; Plant hormone signal transduction | ko04931; Human Diseases; Endocrine and metabolic diseases; Insulin resistance}	{At5g59220; KOG0698 Serine/threonine protein phosphatase T Signal transduction mechanisms ;}	{GO:0003824; NA}	{XM_010687381.2; PREDICTED: Beta vulgaris subsp. vulgaris Probable protein phosphatase 2C 24 (LOC104900051), mRNA}	{PF00481:Protein phosphatase 2C}
transcript_HQ_SAB_transcript16531/f2p0/1839	6.3107e-05	0.00016839	{XP_010669214.1; PREDICTED: Probable protein phosphatase 2C 72 [Beta vulgaris subsp. vulgaris]}	{sp|Q9XGZ9|P2C72_ARATH; Probable protein phosphatase 2C 72 OS=Arabidopsis thaliana GN=At5g26010 PE=2 SV=2}	{bvg:104886463; - - - - -}	{At5g26010; KOG0698 Serine/threonine protein phosphatase T Signal transduction mechanisms ;}	{GO:0003824; NA}	{XM_010670912.2; PREDICTED: Beta vulgaris subsp. vulgaris Probable protein phosphatase 2C 72 (LOC104886463), mRNA}	{PF00481:Protein phosphatase 2C}
transcript_HQ_SAB_transcript16151/f2p0/1854	1.9108e-12	8.9992e-12	{KNA15680.1; hypothetical protein SOVF_096010 [Spinacia oleracea]}	{sp|O81760|P2C63_ARATH; Probable protein phosphatase 2C 63 OS=Arabidopsis thaliana GN=At4g33920 PE=2 SV=1}	{jcu:105650748; - - - - -}	{At4g33920; KOG0700 Protein phosphatase 2C/pyruvate dehydrogenase (lipoamide) phosphatase T Signal transduction mechanisms ;}	{GO:0003824; NA}	{XM_010689202.2; PREDICTED: Beta vulgaris subsp. vulgaris Probable protein phosphatase 2C 63 (LOC104901613), mRNA}	{PF07228:Stage II sporulation protein E (SpoIIE) PF00481:Protein phosphatase 2C}
transcript_HQ_SAB_transcript15288/f3p0/1871	7.5428e-05	0.00019953	{XP_010685683.1; PREDICTED: Probable protein phosphatase 2C 24 [Beta vulgaris subsp. vulgaris]}	{sp|Q9FIF5|P2C78_ARATH; Probable protein phosphatase 2C 78 OS=Arabidopsis thaliana GN=SAG113 PE=2 SV=1}	{jcu:105629918; K14497 PP2C protein phosphatase 2C 3.1.3.16 ko04016; Environmental Information Processing; Signal transduction; MAPK signaling pathway - plant | ko04075; Environmental Information Processing; Signal transduction; Plant hormone signal transduction | ko04931; Human Diseases; Endocrine and metabolic diseases; Insulin resistance}	{At5g59220; KOG0698 Serine/threonine protein phosphatase T Signal transduction mechanisms ;}	{GO:0003824; NA}	{XM_010687381.2; PREDICTED: Beta vulgaris subsp. vulgaris Probable protein phosphatase 2C 24 (LOC104900051), mRNA}	{PF00481:Protein phosphatase 2C}
transcript_HQ_SAB_transcript14291/f2p0/1972	7.4186e-08	2.6063e-07	{XP_010669214.1; PREDICTED: Probable protein phosphatase 2C 72 [Beta vulgaris subsp. vulgaris]}	{sp|Q9XGZ9|P2C72_ARATH; Probable protein phosphatase 2C 72 OS=Arabidopsis thaliana GN=At5g26010 PE=2 SV=2}	{bvg:104886463; - - - - -}	{At5g26010; KOG0698 Serine/threonine protein phosphatase T Signal transduction mechanisms ;}	{GO:0003824; NA}	{XM_010670912.2; PREDICTED: Beta vulgaris subsp. vulgaris Probable protein phosphatase 2C 72 (LOC104886463), mRNA}	{PF00481:Protein phosphatase 2C}
transcript_HQ_SAB_transcript13544/f2p0/2028	0.00029289	0.00072022	{KNA15314.1; hypothetical protein SOVF_098730 [Spinacia oleracea]}	{sp|Q0V7V2|P2C42_ARATH; Probable protein phosphatase 2C 42 OS=Arabidopsis thaliana GN=At3g17090 PE=2 SV=1}	{pmum:103323180; K01102 PDP pyruvate dehydrogenase phosphatase 3.1.3.43 -}	{At3g17090; KOG0700 Protein phosphatase 2C/pyruvate dehydrogenase (lipoamide) phosphatase T Signal transduction mechanisms ;}	{GO:0003824; NA}	{XM_008225154.2; PREDICTED: Prunus mume Probable protein phosphatase 2C 42 (LOC103323180), mRNA}	{PF00481:Protein phosphatase 2C}
transcript_HQ_SAB_transcript11192/f3p0/2192	0.0018078	0.0039929	{XP_019106047.1; PREDICTED: Probable protein phosphatase 2C 60 [Beta vulgaris subsp. vulgaris]}	{sp|Q5Z8P0|P2C60_ORYSJ; Probable protein phosphatase 2C 60 OS=Oryza sativa subsp. japonica GN=Os06g0717800 PE=2 SV=1}	{rcu:8267713; K01102 PDP pyruvate dehydrogenase phosphatase 3.1.3.43 -}	{At5g66080; KOG0700 Protein phosphatase 2C/pyruvate dehydrogenase (lipoamide) phosphatase T Signal transduction mechanisms ;}	{GO:0003824; NA}	{XM_019250502.1; PREDICTED: Beta vulgaris subsp. vulgaris Probable protein phosphatase 2C 60 (LOC104897793), mRNA}	{PF00481:Protein phosphatase 2C PF07228:Stage II sporulation protein E (SpoIIE)}
transcript_HQ_SAB_transcript10772/f2p0/2236	0.0094725	0.018628	{KNA15988.1; hypothetical protein SOVF_093290 [Spinacia oleracea]}	{sp|Q9FX08|P2C12_ARATH; Probable protein phosphatase 2C 12 OS=Arabidopsis thaliana GN=At1g47380 PE=2 SV=1}	{eus:EUTSA_v10011502mg; - - - - -}	{At1g47380; KOG0698 Serine/threonine protein phosphatase T Signal transduction mechanisms ;}	{GO:0003824; NA}	{XM_010669213.2; PREDICTED: Beta vulgaris subsp. vulgaris Probable protein phosphatase 2C 12 (LOC104884536), mRNA}	{PF00481:Protein phosphatase 2C PF07228:Stage II sporulation protein E (SpoIIE)}
transcript_HQ_SAB_transcript10759/f3p0/2270	0.0099431	0.019479	{XP_010690331.1; PREDICTED: Probable protein phosphatase 2C 60 [Beta vulgaris subsp. vulgaris]}	{sp|Q7XCJ7|P2C72_ORYSJ; Probable protein phosphatase 2C 72 OS=Oryza sativa subsp. japonica GN=Os10g0544900 PE=2 SV=1}	{obr:102715549; - - - - -}	{At5g66080; KOG0700 Protein phosphatase 2C/pyruvate dehydrogenase (lipoamide) phosphatase T Signal transduction mechanisms ;}	{GO:0003824; NA}	{XM_010692029.2; PREDICTED: Beta vulgaris subsp. vulgaris Probable protein phosphatase 2C 60 (LOC104903895), transcript variant X2, mRNA}	{PF00481:Protein phosphatase 2C}
transcript_HQ_SAB_transcript10480/f2p0/2327	1.0183e-36	1.0811e-35	{XP_010670734.1; PREDICTED: Probable protein phosphatase 2C 22 [Beta vulgaris subsp. vulgaris]}	{sp|Q9SLA1|P2C22_ARATH; Probable protein phosphatase 2C 22 OS=Arabidopsis thaliana GN=At2g25620 PE=2 SV=1}	{bvg:104887717; K14803 PTC2_3 protein phosphatase PTC2/3 3.1.3.16 -}	{At2g25620; KOG0698 Serine/threonine protein phosphatase T Signal transduction mechanisms ;}	{GO:0003824; NA}	{XM_010672432.2; PREDICTED: Beta vulgaris subsp. vulgaris Probable protein phosphatase 2C 22 (LOC104887717), mRNA}	{PF00481:Protein phosphatase 2C}
transcript_HQ_BAB_transcript9803/f2p0/2593	3.1425e-07	1.0504e-06	{XP_010690331.1; PREDICTED: Probable protein phosphatase 2C 60 [Beta vulgaris subsp. vulgaris]}	{sp|Q10S32|P2C28_ORYSJ; Probable protein phosphatase 2C 28 OS=Oryza sativa subsp. japonica GN=Os03g0137200 PE=2 SV=1}	{pper:PRUPE_ppa006747mg; K01102 PDP pyruvate dehydrogenase phosphatase 3.1.3.43 -}	{At4g38520; KOG0700 Protein phosphatase 2C/pyruvate dehydrogenase (lipoamide) phosphatase T Signal transduction mechanisms ;}	{GO:0003824; NA}	{XM_010692030.2; PREDICTED: Beta vulgaris subsp. vulgaris Probable protein phosphatase 2C 60 (LOC104903895), transcript variant X1, mRNA}	{PF00481:Protein phosphatase 2C PF07228:Stage II sporulation protein E (SpoIIE)}
transcript_HQ_BAB_transcript945/f2p0/4395	1.0511e-34	1.0667e-33	{XP_010669214.1; PREDICTED: Probable protein phosphatase 2C 72 [Beta vulgaris subsp. vulgaris]}	{sp|Q9XGZ9|P2C72_ARATH; Probable protein phosphatase 2C 72 OS=Arabidopsis thaliana GN=At5g26010 PE=2 SV=2}	{bvg:104886463; - - - - -}	{At5g26010; KOG0698 Serine/threonine protein phosphatase T Signal transduction mechanisms ;}	{GO:0003824; NA}	{XM_010670912.2; PREDICTED: Beta vulgaris subsp. vulgaris Probable protein phosphatase 2C 72 (LOC104886463), mRNA}	{PF00481:Protein phosphatase 2C}
transcript_HQ_BAB_transcript9175/f2p0/2656	1.0562e-83	2.5044e-82	{XP_010690331.1; PREDICTED: Probable protein phosphatase 2C 60 [Beta vulgaris subsp. vulgaris]}	{sp|Q10S32|P2C28_ORYSJ; Probable protein phosphatase 2C 28 OS=Oryza sativa subsp. japonica GN=Os03g0137200 PE=2 SV=1}	{pper:PRUPE_ppa006747mg; K01102 PDP pyruvate dehydrogenase phosphatase 3.1.3.43 -}	{At4g38520; KOG0700 Protein phosphatase 2C/pyruvate dehydrogenase (lipoamide) phosphatase T Signal transduction mechanisms ;}	{GO:0003824; NA}	{XM_010692030.2; PREDICTED: Beta vulgaris subsp. vulgaris Probable protein phosphatase 2C 60 (LOC104903895), transcript variant X1, mRNA}	{PF00481:Protein phosphatase 2C PF07228:Stage II sporulation protein E (SpoIIE)}
transcript_HQ_BAB_transcript9048/f3p0/2678	3.3849e-46	4.4065e-45	{XP_010690331.1; PREDICTED: Probable protein phosphatase 2C 60 [Beta vulgaris subsp. vulgaris]}	{sp|Q10S32|P2C28_ORYSJ; Probable protein phosphatase 2C 28 OS=Oryza sativa subsp. japonica GN=Os03g0137200 PE=2 SV=1}	{pper:PRUPE_ppa006747mg; K01102 PDP pyruvate dehydrogenase phosphatase 3.1.3.43 -}	{At4g38520; KOG0700 Protein phosphatase 2C/pyruvate dehydrogenase (lipoamide) phosphatase T Signal transduction mechanisms ;}	{GO:0003824; NA}	{XM_010692030.2; PREDICTED: Beta vulgaris subsp. vulgaris Probable protein phosphatase 2C 60 (LOC104903895), transcript variant X1, mRNA}	{PF07228:Stage II sporulation protein E (SpoIIE) PF00481:Protein phosphatase 2C}
transcript_HQ_BAB_transcript7423/f3p0/2915	0.002415	0.0052391	{KNA09453.1; hypothetical protein SOVF_153500, partial [Spinacia oleracea]}	{sp|Q93V88|P2C62_ARATH; Probable protein phosphatase 2C 62 OS=Arabidopsis thaliana GN=At4g33500 PE=2 SV=1}	{vvi:100262272; - - - - -}	{At4g33500_1; KOG1379 Serine/threonine protein phosphatase T Signal transduction mechanisms ;}	{GO:0003824; NA}	{XM_010668562.2; PREDICTED: Beta vulgaris subsp. vulgaris Probable protein phosphatase 2C 62 (LOC104883980), transcript variant X2, mRNA}	{PF00481:Protein phosphatase 2C PF07228:Stage II sporulation protein E (SpoIIE)}
transcript_HQ_BAB_transcript7199/f7p0/2893	0.0096143	0.018882	{KNA09453.1; hypothetical protein SOVF_153500, partial [Spinacia oleracea]}	{sp|Q93V88|P2C62_ARATH; Probable protein phosphatase 2C 62 OS=Arabidopsis thaliana GN=At4g33500 PE=2 SV=1}	{vvi:100262272; - - - - -}	{At4g33500_1; KOG1379 Serine/threonine protein phosphatase T Signal transduction mechanisms ;}	{GO:0003824; NA}	{XM_010668562.2; PREDICTED: Beta vulgaris subsp. vulgaris Probable protein phosphatase 2C 62 (LOC104883980), transcript variant X2, mRNA}	{PF00481:Protein phosphatase 2C PF07228:Stage II sporulation protein E (SpoIIE)}
transcript_HQ_BAB_transcript5300/f2p0/3255	1.4185e-07	4.8805e-07	{KNA22674.1; hypothetical protein SOVF_032320 [Spinacia oleracea]}	{sp|Q9CAJ0|P2C16_ARATH; Protein phosphatase 2C 16 OS=Arabidopsis thaliana GN=HAB1 PE=1 SV=1}	{cmo:103488507; K14497 PP2C protein phosphatase 2C 3.1.3.16 ko04016; Environmental Information Processing; Signal transduction; MAPK signaling pathway - plant | ko04075; Environmental Information Processing; Signal transduction; Plant hormone signal transduction | ko04931; Human Diseases; Endocrine and metabolic diseases; Insulin resistance}	{At1g72770; KOG0698 Serine/threonine protein phosphatase T Signal transduction mechanisms ;}	{GO:0003824; NA}	{XM_010698249.2; PREDICTED: Beta vulgaris subsp. vulgaris Probable protein phosphatase 2C 50 (LOC104909063), mRNA}	{PF07228:Stage II sporulation protein E (SpoIIE) PF00481:Protein phosphatase 2C}
transcript_HQ_BAB_transcript2905/f2p0/3691	4.8246e-18	2.9401e-17	{KNA15680.1; hypothetical protein SOVF_096010 [Spinacia oleracea]}	{sp|O81760|P2C63_ARATH; Probable protein phosphatase 2C 63 OS=Arabidopsis thaliana GN=At4g33920 PE=2 SV=1}	{nta:107771588; - - - - -}	{At4g33920; KOG0700 Protein phosphatase 2C/pyruvate dehydrogenase (lipoamide) phosphatase T Signal transduction mechanisms ;}	{GO:0003824; NA}	{XM_010689202.2; PREDICTED: Beta vulgaris subsp. vulgaris Probable protein phosphatase 2C 63 (LOC104901613), mRNA}	{PF00481:Protein phosphatase 2C}
transcript_HQ_BAB_transcript19840/f3p0/1333	2.8469e-06	8.7338e-06	{KNA13245.1; hypothetical protein SOVF_118530 [Spinacia oleracea]}	{sp|Q93YW5|P2C58_ARATH; Probable protein phosphatase 2C 58 OS=Arabidopsis thaliana GN=At4g28400 PE=2 SV=1}	{cit:102608973; - - - - -}	{At3g15260; KOG0698 Serine/threonine protein phosphatase T Signal transduction mechanisms ;}	{GO:0003824; NA}	{XM_010690757.2; PREDICTED: Beta vulgaris subsp. vulgaris Probable protein phosphatase 2C 39 (LOC104902838), mRNA}	{PF00481:Protein phosphatase 2C PF07228:Stage II sporulation protein E (SpoIIE)}
transcript_HQ_BAB_transcript19769/f2p0/1338	9.2491e-103	2.7523e-101	{KNA13245.1; hypothetical protein SOVF_118530 [Spinacia oleracea]}	{sp|Q93YW5|P2C58_ARATH; Probable protein phosphatase 2C 58 OS=Arabidopsis thaliana GN=At4g28400 PE=2 SV=1}	{cit:102608973; - - - - -}	{At3g15260; KOG0698 Serine/threonine protein phosphatase T Signal transduction mechanisms ;}	{GO:0003824; NA}	{XM_010690757.2; PREDICTED: Beta vulgaris subsp. vulgaris Probable protein phosphatase 2C 39 (LOC104902838), mRNA}	{PF00481:Protein phosphatase 2C PF07228:Stage II sporulation protein E (SpoIIE)}
transcript_HQ_BAB_transcript19545/f2p0/1392	4.5317e-69	8.6962e-68	{XP_010685523.1; PREDICTED: Probable protein phosphatase 2C 25 [Beta vulgaris subsp. vulgaris]}	{sp|O80871|P2C25_ARATH; Probable protein phosphatase 2C 25 OS=Arabidopsis thaliana GN=At2g30020 PE=1 SV=1}	{jcu:105639610; - - - - -}	{At2g30020; KOG0698 Serine/threonine protein phosphatase T Signal transduction mechanisms ;}	{GO:0003824; NA}	{XM_010687221.2; PREDICTED: Beta vulgaris subsp. vulgaris Probable protein phosphatase 2C 25 (LOC104899930), mRNA}	{PF07228:Stage II sporulation protein E (SpoIIE) PF00481:Protein phosphatase 2C}
transcript_HQ_BAB_transcript19533/f3p0/1407	4.1485e-05	0.00011302	{KNA10479.1; hypothetical protein SOVF_144130 [Spinacia oleracea]}	{sp|Q9SZ53|P2C60_ARATH; Probable protein phosphatase 2C 60 OS=Arabidopsis thaliana GN=At4g31860 PE=2 SV=1}	{cann:107871708; - - - - -}	{At4g31860; KOG0698 Serine/threonine protein phosphatase T Signal transduction mechanisms ;}	{GO:0003824; NA}	{XM_010697162.2; PREDICTED: Beta vulgaris subsp. vulgaris Probable protein phosphatase 2C 21 (LOC104908092), transcript variant X5, mRNA}	{PF00481:Protein phosphatase 2C PF07228:Stage II sporulation protein E (SpoIIE)}
transcript_HQ_BAB_transcript18970/f13p0/1477	0	0	{XP_010685523.1; PREDICTED: Probable protein phosphatase 2C 25 [Beta vulgaris subsp. vulgaris]}	{sp|O80871|P2C25_ARATH; Probable protein phosphatase 2C 25 OS=Arabidopsis thaliana GN=At2g30020 PE=1 SV=1}	{jcu:105639610; - - - - -}	{At2g30020; KOG0698 Serine/threonine protein phosphatase T Signal transduction mechanisms ;}	{GO:0003824; NA}	{XM_010687221.2; PREDICTED: Beta vulgaris subsp. vulgaris Probable protein phosphatase 2C 25 (LOC104899930), mRNA}	{PF07228:Stage II sporulation protein E (SpoIIE) PF00481:Protein phosphatase 2C}
transcript_HQ_BAB_transcript18843/f4p0/1540	3.5182e-61	5.9277e-60	{XP_010685523.1; PREDICTED: Probable protein phosphatase 2C 25 [Beta vulgaris subsp. vulgaris]}	{sp|O80871|P2C25_ARATH; Probable protein phosphatase 2C 25 OS=Arabidopsis thaliana GN=At2g30020 PE=1 SV=1}	{jcu:105639610; - - - - -}	{At2g30020; KOG0698 Serine/threonine protein phosphatase T Signal transduction mechanisms ;}	{GO:0003824; NA}	{XM_010687221.2; PREDICTED: Beta vulgaris subsp. vulgaris Probable protein phosphatase 2C 25 (LOC104899930), mRNA}	{PF07228:Stage II sporulation protein E (SpoIIE) PF00481:Protein phosphatase 2C}
transcript_HQ_BAB_transcript1816/f2p0/4009	0.0094762	0.018633	{KNA05522.1; hypothetical protein SOVF_189470 [Spinacia oleracea]}	{sp|Q8RXY0|Y3333_ARATH; Probable inactive protein kinase At3g63330 OS=Arabidopsis thaliana GN=At3g63330 PE=2 SV=1}	{bvg:104894555; - - - - -}	{At3g63340_1; KOG0698 Serine/threonine protein phosphatase T Signal transduction mechanisms ;}	{GO:0005524; ATP binding; molecular_function GO:0006468; protein phosphorylation; biological_process GO:0003824; NA GO:0004672; protein kinase activity; molecular_function}	{XR_790231.2; PREDICTED: Beta vulgaris subsp. vulgaris Probable protein phosphatase 2C 51 (LOC104894555), transcript variant X1, misc_RNA}	{PF07714:Protein tyrosine kinase PF00481:Protein phosphatase 2C PF00069:Protein kinase domain}
transcript_HQ_BAB_transcript1760/f2p0/4026	1.2278e-10	5.2162e-10	{KNA05522.1; hypothetical protein SOVF_189470 [Spinacia oleracea]}	{sp|Q8RXY0|Y3333_ARATH; Probable inactive protein kinase At3g63330 OS=Arabidopsis thaliana GN=At3g63330 PE=2 SV=1}	{bvg:104894555; - - - - -}	{At3g63340_1; KOG0698 Serine/threonine protein phosphatase T Signal transduction mechanisms ;}	{GO:0004672; protein kinase activity; molecular_function GO:0003824; NA GO:0006468; protein phosphorylation; biological_process GO:0005524; ATP binding; molecular_function}	{XR_790231.2; PREDICTED: Beta vulgaris subsp. vulgaris Probable protein phosphatase 2C 51 (LOC104894555), transcript variant X1, misc_RNA}	{PF00069:Protein kinase domain PF00481:Protein phosphatase 2C PF07714:Protein tyrosine kinase}
transcript_HQ_BAB_transcript17178/f5p0/1724	0.0056614	0.011589	{XP_010669214.1; PREDICTED: Probable protein phosphatase 2C 72 [Beta vulgaris subsp. vulgaris]}	{sp|Q9XGZ9|P2C72_ARATH; Probable protein phosphatase 2C 72 OS=Arabidopsis thaliana GN=At5g26010 PE=2 SV=2}	{bvg:104886463; - - - - -}	{At5g26010; KOG0698 Serine/threonine protein phosphatase T Signal transduction mechanisms ;}	{GO:0003824; NA}	{XM_010670912.2; PREDICTED: Beta vulgaris subsp. vulgaris Probable protein phosphatase 2C 72 (LOC104886463), mRNA}	{PF00481:Protein phosphatase 2C}
transcript_HQ_BAB_transcript16369/f3p0/1867	8.2127e-17	4.7526e-16	{XP_010674109.1; PREDICTED: Probable protein phosphatase 2C 5 [Beta vulgaris subsp. vulgaris]}	{sp|O80492|P2C05_ARATH; Probable protein phosphatase 2C 5 OS=Arabidopsis thaliana GN=At1g09160 PE=2 SV=1}	{bvg:104890355; - - - - -}	{At1g09160; KOG0698 Serine/threonine protein phosphatase T Signal transduction mechanisms ;}	{GO:0003824; NA}	{XM_010675807.2; PREDICTED: Beta vulgaris subsp. vulgaris Probable protein phosphatase 2C 5 (LOC104890355), mRNA}	{PF07228:Stage II sporulation protein E (SpoIIE) PF00481:Protein phosphatase 2C}
transcript_HQ_BAB_transcript15971/f5p0/1898	5.7455e-17	3.3561e-16	{KNA15314.1; hypothetical protein SOVF_098730 [Spinacia oleracea]}	{sp|Q0V7V2|P2C42_ARATH; Probable protein phosphatase 2C 42 OS=Arabidopsis thaliana GN=At3g17090 PE=2 SV=1}	{pmum:103323180; K01102 PDP pyruvate dehydrogenase phosphatase 3.1.3.43 -}	{At3g17090; KOG0700 Protein phosphatase 2C/pyruvate dehydrogenase (lipoamide) phosphatase T Signal transduction mechanisms ;}	{GO:0003824; NA}	{XM_008225154.2; PREDICTED: Prunus mume Probable protein phosphatase 2C 42 (LOC103323180), mRNA}	{PF07228:Stage II sporulation protein E (SpoIIE) PF00481:Protein phosphatase 2C}
transcript_HQ_BAB_transcript15601/f4p0/1952	1.836e-16	1.0453e-15	{XP_010669220.1; PREDICTED: Probable protein phosphatase 2C 12 [Beta vulgaris subsp. vulgaris]}	{sp|Q6Z8B9|P2C12_ORYSJ; Probable protein phosphatase 2C 12 OS=Oryza sativa subsp. japonica GN=Os02g0224100 PE=2 SV=1}	{bvg:104886469; - - - - -}	{At5g26010; KOG0698 Serine/threonine protein phosphatase T Signal transduction mechanisms ;}	{GO:0003824; NA}	{NA}	{PF00481:Protein phosphatase 2C}
transcript_HQ_BAB_transcript15266/f5p0/1950	2.0692e-06	6.4378e-06	{KNA10919.1; hypothetical protein SOVF_139870 [Spinacia oleracea]}	{sp|Q9LUS8|P2C40_ARATH; Probable protein phosphatase 2C 40 OS=Arabidopsis thaliana GN=At3g16560 PE=2 SV=1}	{mdm:103452924; - - - - -}	{At3g16560; KOG0700 Protein phosphatase 2C/pyruvate dehydrogenase (lipoamide) phosphatase T Signal transduction mechanisms ;}	{GO:0003824; NA}	{XM_010669016.2; PREDICTED: Beta vulgaris subsp. vulgaris Probable protein phosphatase 2C 40 (LOC104884373), transcript variant X3, mRNA}	{PF00481:Protein phosphatase 2C}
transcript_HQ_BAB_transcript14818/f3p0/2043	1.3602e-15	7.478e-15	{KNA15680.1; hypothetical protein SOVF_096010 [Spinacia oleracea]}	{sp|O81760|P2C63_ARATH; Probable protein phosphatase 2C 63 OS=Arabidopsis thaliana GN=At4g33920 PE=2 SV=1}	{jcu:105650748; - - - - -}	{At4g33920; KOG0700 Protein phosphatase 2C/pyruvate dehydrogenase (lipoamide) phosphatase T Signal transduction mechanisms ;}	{GO:0003824; NA}	{XM_010689202.2; PREDICTED: Beta vulgaris subsp. vulgaris Probable protein phosphatase 2C 63 (LOC104901613), mRNA}	{PF07228:Stage II sporulation protein E (SpoIIE) PF00481:Protein phosphatase 2C}
transcript_HQ_BAB_transcript12576/f2p0/2288	0.010233	0.019995	{KNA12988.1; hypothetical protein SOVF_120940 [Spinacia oleracea]}	{sp|Q0WRB2|P2C73_ARATH; Probable protein phosphatase 2C 73 OS=Arabidopsis thaliana GN=PPC6-7 PE=2 SV=1}	{bvg:104890346; - - - - -}	{At3g05640; KOG0698 Serine/threonine protein phosphatase T Signal transduction mechanisms ;}	{GO:0003824; NA}	{XM_010675790.2; PREDICTED: Beta vulgaris subsp. vulgaris Probable protein phosphatase 2C 34 (LOC104890346), mRNA}	{PF00481:Protein phosphatase 2C}
transcript_HQ_BAB_transcript12481/f4p0/2275	0	0	{XP_010670734.1; PREDICTED: Probable protein phosphatase 2C 22 [Beta vulgaris subsp. vulgaris]}	{sp|Q9SLA1|P2C22_ARATH; Probable protein phosphatase 2C 22 OS=Arabidopsis thaliana GN=At2g25620 PE=2 SV=1}	{bvg:104887717; K14803 PTC2_3 protein phosphatase PTC2/3 3.1.3.16 -}	{At2g25620; KOG0698 Serine/threonine protein phosphatase T Signal transduction mechanisms ;}	{GO:0003824; NA}	{XM_010672432.2; PREDICTED: Beta vulgaris subsp. vulgaris Probable protein phosphatase 2C 22 (LOC104887717), mRNA}	{PF00481:Protein phosphatase 2C}
transcript_HQ_BAB_transcript11525/f3p0/2379	7.9377e-45	1.0079e-43	{XP_010690331.1; PREDICTED: Probable protein phosphatase 2C 60 [Beta vulgaris subsp. vulgaris]}	{sp|Q10S32|P2C28_ORYSJ; Probable protein phosphatase 2C 28 OS=Oryza sativa subsp. japonica GN=Os03g0137200 PE=2 SV=1}	{pper:PRUPE_ppa006747mg; K01102 PDP pyruvate dehydrogenase phosphatase 3.1.3.43 -}	{At4g38520; KOG0700 Protein phosphatase 2C/pyruvate dehydrogenase (lipoamide) phosphatase T Signal transduction mechanisms ;}	{GO:0003824; NA}	{XM_010692030.2; PREDICTED: Beta vulgaris subsp. vulgaris Probable protein phosphatase 2C 60 (LOC104903895), transcript variant X1, mRNA}	{PF00481:Protein phosphatase 2C PF07228:Stage II sporulation protein E (SpoIIE)}
transcript_HQ_BAB_transcript11087/f2p0/2433	8.7087e-40	9.962e-39	{XP_010685766.1; PREDICTED: Probable protein phosphatase 2C 23 [Beta vulgaris subsp. vulgaris]}	{sp|Q9ZV25|P2C23_ARATH; Probable protein phosphatase 2C 23 OS=Arabidopsis thaliana GN=PLL4 PE=2 SV=1}	{nnu:104593809; - - - - -}	{At2g28890; KOG0700 Protein phosphatase 2C/pyruvate dehydrogenase (lipoamide) phosphatase T Signal transduction mechanisms ;}	{GO:0003824; NA}	{XM_010687464.2; PREDICTED: Beta vulgaris subsp. vulgaris Probable protein phosphatase 2C 23 (LOC104900119), mRNA}	{PF00481:Protein phosphatase 2C PF07228:Stage II sporulation protein E (SpoIIE)}
transcript_HQ_BAB_transcript10610/f3p0/2535	2.7613e-83	6.4752e-82	{XP_010670734.1; PREDICTED: Probable protein phosphatase 2C 22 [Beta vulgaris subsp. vulgaris]}	{sp|Q9SLA1|P2C22_ARATH; Probable protein phosphatase 2C 22 OS=Arabidopsis thaliana GN=At2g25620 PE=2 SV=1}	{bvg:104887717; K14803 PTC2_3 protein phosphatase PTC2/3 3.1.3.16 -}	{At2g25620; KOG0698 Serine/threonine protein phosphatase T Signal transduction mechanisms ;}	{GO:0003824; NA}	{XM_010672432.2; PREDICTED: Beta vulgaris subsp. vulgaris Probable protein phosphatase 2C 22 (LOC104887717), mRNA}	{PF00481:Protein phosphatase 2C}
transcript_HQ_SAB_transcript20947/f2p0/1577	9.3723e-05	0.00024489	{XP_010680996.1; PREDICTED: Serine/threonine-protein kinase SAPK2 [Beta vulgaris subsp. vulgaris]}	{sp|Q75LR7|SAPK1_ORYSJ; Serine/threonine-protein kinase SAPK1 OS=Oryza sativa subsp. japonica GN=SAPK1 PE=1 SV=1}	{vvi:100260262; K14498 SNRK2 Serine/threonine-protein kinase SRK2 2.7.11.1 ko04016; Environmental Information Processing; Signal transduction; MAPK signaling pathway - plant | ko04075; Environmental Information Processing; Signal transduction; Plant hormone signal transduction}	{At1g78290; KOG0583 Serine/threonine protein kinase T Signal transduction mechanisms ;}	{GO:0006468; protein phosphorylation; biological_process GO:0016020; membrane; cellular_component GO:0004672; protein kinase activity; molecular_function GO:0016773; phosphotransferase activity, alcohol group as acceptor; molecular_function GO:0005524; ATP binding; molecular_function}	{XM_010682694.2; PREDICTED: Beta vulgaris subsp. vulgaris Serine/threonine-protein kinase SAPK2 (LOC104896021), mRNA}	{PF06293:Lipopolysaccharide kinase (Kdo/WaaP) family PF00069:Protein kinase domain PF07714:Protein tyrosine kinase}
transcript_HQ_SAB_transcript16305/f3p0/1853	0.0001882	0.00047298	{XP_010680446.1; PREDICTED: Serine/threonine-protein kinase SRK2I [Beta vulgaris subsp. vulgaris]}	{sp|Q39193|SRK2I_ARATH; Serine/threonine-protein kinase SRK2I OS=Arabidopsis thaliana GN=SRK2I PE=1 SV=1}	{cit:102610632; K14498 SNRK2 Serine/threonine-protein kinase SRK2 2.7.11.1 ko04016; Environmental Information Processing; Signal transduction; MAPK signaling pathway - plant | ko04075; Environmental Information Processing; Signal transduction; Plant hormone signal transduction}	{At5g66880; KOG0583 Serine/threonine protein kinase T Signal transduction mechanisms ;}	{GO:0005524; ATP binding; molecular_function GO:0004672; protein kinase activity; molecular_function GO:0006468; protein phosphorylation; biological_process}	{XM_010682144.2; PREDICTED: Beta vulgaris subsp. vulgaris Serine/threonine-protein kinase SRK2I (LOC104895591), mRNA}	{PF00069:Protein kinase domain PF07714:Protein tyrosine kinase}
transcript_HQ_BAB_transcript18071/f2p0/1650	0.006955	0.014028	{XP_010680446.1; PREDICTED: Serine/threonine-protein kinase SRK2I [Beta vulgaris subsp. vulgaris]}	{sp|Q39193|SRK2I_ARATH; Serine/threonine-protein kinase SRK2I OS=Arabidopsis thaliana GN=SRK2I PE=1 SV=1}	{csv:101206398; K14498 SNRK2 Serine/threonine-protein kinase SRK2 2.7.11.1 ko04016; Environmental Information Processing; Signal transduction; MAPK signaling pathway - plant | ko04075; Environmental Information Processing; Signal transduction; Plant hormone signal transduction}	{At5g66880; KOG0583 Serine/threonine protein kinase T Signal transduction mechanisms ;}	{GO:0004672; protein kinase activity; molecular_function GO:0005524; ATP binding; molecular_function GO:0006468; protein phosphorylation; biological_process}	{XM_010682144.2; PREDICTED: Beta vulgaris subsp. vulgaris Serine/threonine-protein kinase SRK2I (LOC104895591), mRNA}	{PF07714:Protein tyrosine kinase PF00069:Protein kinase domain}
transcript_HQ_SAB_transcript9139/f2p0/2381	3.1073e-24	2.3582e-23	{XP_010671821.1; PREDICTED: Probable E3 ubiquitin-protein ligase ARI7 isoform X1 [Beta vulgaris subsp. vulgaris]}	{sp|Q8W468|ARI8_ARATH; Probable E3 ubiquitin-protein ligase ARI8 OS=Arabidopsis thaliana GN=ARI8 PE=2 SV=1}	{bvg:104888512; K11968 ARIH1 ariadne-1 2.3.2.27 -}	{At1g65430; KOG1815 Predicted E3 ubiquitin ligase O Posttranslational modification, protein turnover, chaperones ;}	{GO:0005515; protein binding; molecular_function GO:0008270; zinc ion binding; molecular_function GO:0046872; metal ion binding; molecular_function GO:0055114; oxidation-reduction process; biological_process GO:0016491; oxidoreductase activity; molecular_function}	{XM_010673519.2; PREDICTED: Beta vulgaris subsp. vulgaris Probable E3 ubiquitin-protein ligase ARI7 (LOC104888512), transcript variant X1, mRNA}	{PF01232:Mannitol dehydrogenase Rossmann domain PF13639:Ring finger domain PF00097:Zinc finger, C3HC4 type (RING finger) PF14634:zinc-RING finger domain}
transcript_HQ_SAB_transcript9065/f3p0/2391	0.0062151	0.012636	{XP_010682363.1; PREDICTED: Probable E3 ubiquitin-protein ligase HERC4 [Beta vulgaris subsp. vulgaris]}	{sp|O95714|HERC2_HUMAN; E3 ubiquitin-protein ligase HERC2 OS=Homo sapiens GN=HERC2 PE=1 SV=2}	{vvi:100247438; - - - - -}	{At3g26100; KOG1426 FOG: RCC1 domain S Function unknown ;}	{NA}	{XM_010684062.2; PREDICTED: Beta vulgaris subsp. vulgaris Probable E3 ubiquitin-protein ligase HERC4 (LOC104897229), transcript variant X2, mRNA}	{NA}
transcript_HQ_SAB_transcript8741/f4p0/2340	1.826e-06	5.7097e-06	{XP_010684232.1; PREDICTED: Probable E3 ubiquitin-protein ligase ARI2 isoform X1 [Beta vulgaris subsp. vulgaris]}	{sp|Q84RR2|ARI2_ARATH; Probable E3 ubiquitin-protein ligase ARI2 OS=Arabidopsis thaliana GN=ARI2 PE=2 SV=1}	{bvg:104898820; K11968 ARIH1 ariadne-1 2.3.2.27 -}	{At4g34370; KOG1815 Predicted E3 ubiquitin ligase O Posttranslational modification, protein turnover, chaperones ;}	{GO:0005515; protein binding; molecular_function GO:0008270; zinc ion binding; molecular_function GO:0046872; metal ion binding; molecular_function}	{XM_010685930.2; PREDICTED: Beta vulgaris subsp. vulgaris Probable E3 ubiquitin-protein ligase ARI2 (LOC104898820), transcript variant X1, mRNA}	{PF13639:Ring finger domain PF00097:Zinc finger, C3HC4 type (RING finger) PF14634:zinc-RING finger domain}
transcript_HQ_SAB_transcript6741/f2p0/2653	2.2661e-25	1.7765e-24	{KNA05952.1; hypothetical protein SOVF_185600 isoform A [Spinacia oleracea]}	{sp|Q8W468|ARI8_ARATH; Probable E3 ubiquitin-protein ligase ARI8 OS=Arabidopsis thaliana GN=ARI8 PE=2 SV=1}	{bvg:104890186; K11968 ARIH1 ariadne-1 2.3.2.27 -}	{At1g65430; KOG1815 Predicted E3 ubiquitin ligase O Posttranslational modification, protein turnover, chaperones ;}	{GO:0005634; nucleus; cellular_component GO:0046872; metal ion binding; molecular_function GO:0016586; RSC complex; cellular_component GO:0016514; SWI/SNF complex; cellular_component GO:0008270; zinc ion binding; molecular_function GO:0006338; chromatin remodeling; biological_process GO:0005515; protein binding; molecular_function}	{XM_010675577.2; PREDICTED: Beta vulgaris subsp. vulgaris Probable E3 ubiquitin-protein ligase ARI8 (LOC104890186), transcript variant X1, mRNA}	{PF14634:zinc-RING finger domain PF00097:Zinc finger, C3HC4 type (RING finger) PF09510:Rtt102p-like transcription regulator protein PF13639:Ring finger domain}
transcript_HQ_SAB_transcript648/f2p0/4326	3.4131e-05	9.4017e-05	{XP_010680417.1; PREDICTED: uncharacterized protein LOC104895565 [Beta vulgaris subsp. vulgaris]}	{sp|Q9VR91|HERC2_DROME; Probable E3 ubiquitin-protein ligase HERC2 OS=Drosophila melanogaster GN=HERC2 PE=1 SV=3}	{bvg:104895565; - - - - -}	{NA}	{GO:0005876; spindle microtubule; cellular_component GO:0046872; metal ion binding; molecular_function GO:0042729; DASH complex; cellular_component GO:0008608; attachment of spindle microtubules to kinetochore; biological_process}	{XM_010682115.2; PREDICTED: Beta vulgaris subsp. vulgaris hypothetical protein (LOC104895565), mRNA}	{PF01363:FYVE zinc finger PF08287:Spc19}
transcript_HQ_SAB_transcript4512/f2p0/2955	5.684e-27	4.6584e-26	{XP_019106391.1; PREDICTED: Probable E3 ubiquitin-protein ligase BAH1-like 1 isoform X2 [Beta vulgaris subsp. vulgaris]}	{sp|B8B5U8|BAHL2_ORYSI; Probable E3 ubiquitin-protein ligase BAH1-like 1 OS=Oryza sativa subsp. indica GN=OsI_27296 PE=3 SV=1}	{rcu:8259852; K16275 BAH, NLA E3 ubiquitin-protein ligase BAH 2.3.2.27 -}	{NA}	{GO:0005515; protein binding; molecular_function GO:0008270; zinc ion binding; molecular_function GO:0046872; metal ion binding; molecular_function}	{XM_019250846.1; PREDICTED: Beta vulgaris subsp. vulgaris Probable E3 ubiquitin-protein ligase BAH1-like 1 (LOC104899080), transcript variant X2, mRNA}	{PF13465:Zinc-finger double domain PF13639:Ring finger domain PF14634:zinc-RING finger domain PF00097:Zinc finger, C3HC4 type (RING finger) PF17123:RING-like zinc finger}
transcript_HQ_SAB_transcript29859/f2p0/888	1.5335e-05	4.3807e-05	{XP_010687760.1; PREDICTED: E3 ubiquitin-protein ligase SDIR1 [Beta vulgaris subsp. vulgaris]}	{sp|Q852U6|RHY1A_ARATH; Probable E3 ubiquitin-protein ligase RHY1A OS=Arabidopsis thaliana GN=RHY1A PE=2 SV=1}	{vvi:100241393; - - - - -}	{At2g15580; KOG0800 FOG: Predicted E3 ubiquitin ligase O Posttranslational modification, protein turnover, chaperones ;}	{GO:0005680; anaphase-promoting complex; cellular_component GO:0008270; zinc ion binding; molecular_function GO:0005515; protein binding; molecular_function GO:0004842; ubiquitin-protein ligase activity; molecular_function GO:0046872; metal ion binding; molecular_function}	{XM_010689458.2; PREDICTED: Beta vulgaris subsp. vulgaris E3 ubiquitin-protein ligase SDIR1 (LOC104901832), mRNA}	{PF13639:Ring finger domain PF12861:Anaphase-promoting complex subunit 11 RING-H2 finger PF14634:zinc-RING finger domain PF12678:RING-H2 zinc finger domain PF00097:Zinc finger, C3HC4 type (RING finger) PF17123:RING-like zinc finger}
transcript_HQ_SAB_transcript28507/f2p0/1012	3.3448e-20	2.2153e-19	{XP_010682265.1; PREDICTED: Probable E3 ubiquitin-protein ligase XERICO [Beta vulgaris subsp. vulgaris]}	{sp|Q9SI09|XERIC_ARATH; Probable E3 ubiquitin-protein ligase XERICO OS=Arabidopsis thaliana GN=XERICO PE=1 SV=1}	{gra:105785823; K16285 XERICO RING/U-box domain-containing protein 2.3.2.27 -}	{At2g04240; KOG0800 FOG: Predicted E3 ubiquitin ligase O Posttranslational modification, protein turnover, chaperones ;}	{GO:0008270; zinc ion binding; molecular_function GO:0005680; anaphase-promoting complex; cellular_component GO:0005515; protein binding; molecular_function GO:0046872; metal ion binding; molecular_function GO:0004842; ubiquitin-protein ligase activity; molecular_function}	{XM_010683963.2; PREDICTED: Beta vulgaris subsp. vulgaris Probable E3 ubiquitin-protein ligase XERICO (LOC104897136), mRNA}	{PF00097:Zinc finger, C3HC4 type (RING finger) PF17123:RING-like zinc finger PF12861:Anaphase-promoting complex subunit 11 RING-H2 finger PF12906:RING-variant domain PF17122:Zinc-finger PF14634:zinc-RING finger domain PF12678:RING-H2 zinc finger domain PF13639:Ring finger domain}
transcript_HQ_SAB_transcript27138/f58p0/1081	0.0029325	0.0062807	{XP_010682265.1; PREDICTED: Probable E3 ubiquitin-protein ligase XERICO [Beta vulgaris subsp. vulgaris]}	{sp|Q9SI09|XERIC_ARATH; Probable E3 ubiquitin-protein ligase XERICO OS=Arabidopsis thaliana GN=XERICO PE=1 SV=1}	{pmum:103321837; K16285 XERICO RING/U-box domain-containing protein 2.3.2.27 -}	{At2g04240; KOG0800 FOG: Predicted E3 ubiquitin ligase O Posttranslational modification, protein turnover, chaperones ;}	{GO:0046872; metal ion binding; molecular_function GO:0004842; ubiquitin-protein ligase activity; molecular_function GO:0005515; protein binding; molecular_function GO:0008270; zinc ion binding; molecular_function GO:0005680; anaphase-promoting complex; cellular_component}	{XM_010683963.2; PREDICTED: Beta vulgaris subsp. vulgaris Probable E3 ubiquitin-protein ligase XERICO (LOC104897136), mRNA}	{PF17122:Zinc-finger PF12906:RING-variant domain PF00097:Zinc finger, C3HC4 type (RING finger) PF17123:RING-like zinc finger PF12861:Anaphase-promoting complex subunit 11 RING-H2 finger PF13639:Ring finger domain PF14634:zinc-RING finger domain PF12678:RING-H2 zinc finger domain}
transcript_HQ_SAB_transcript20088/f8p0/1598	5.1474e-10	2.1007e-09	{XP_010684516.1; PREDICTED: Probable E3 ubiquitin-protein ligase BAH1-like 1 isoform X1 [Beta vulgaris subsp. vulgaris]}	{sp|B8B5U8|BAHL2_ORYSI; Probable E3 ubiquitin-protein ligase BAH1-like 1 OS=Oryza sativa subsp. indica GN=OsI_27296 PE=3 SV=1}	{rcu:8259852; K16275 BAH, NLA E3 ubiquitin-protein ligase BAH 2.3.2.27 -}	{NA}	{GO:0005515; protein binding; molecular_function GO:0008270; zinc ion binding; molecular_function GO:0046872; metal ion binding; molecular_function}	{XM_010686214.2; PREDICTED: Beta vulgaris subsp. vulgaris Probable E3 ubiquitin-protein ligase BAH1-like 1 (LOC104899080), transcript variant X1, mRNA}	{PF13465:Zinc-finger double domain PF13639:Ring finger domain PF14634:zinc-RING finger domain PF00097:Zinc finger, C3HC4 type (RING finger) PF17123:RING-like zinc finger}
transcript_HQ_SAB_transcript13265/f10p0/1954	2.5237e-07	8.5041e-07	{XP_010669289.1; PREDICTED: Probable E3 ubiquitin-protein ligase RHG1A [Beta vulgaris subsp. vulgaris]}	{sp|O49500|MBR2_ARATH; E3 ubiquitin-protein ligase MBR2 OS=Arabidopsis thaliana GN=MBR2 PE=1 SV=1}	{bvg:104886539; - - - - -}	{At5g24870; KOG0800 FOG: Predicted E3 ubiquitin ligase O Posttranslational modification, protein turnover, chaperones ;}	{GO:0004842; ubiquitin-protein ligase activity; molecular_function GO:0046872; metal ion binding; molecular_function GO:0005680; anaphase-promoting complex; cellular_component GO:0008270; zinc ion binding; molecular_function GO:0005515; protein binding; molecular_function}	{XM_019247477.1; PREDICTED: Beta vulgaris subsp. vulgaris Probable E3 ubiquitin-protein ligase RHG1A (LOC104886539), transcript variant X3, mRNA}	{PF00097:Zinc finger, C3HC4 type (RING finger) PF17123:RING-like zinc finger PF12861:Anaphase-promoting complex subunit 11 RING-H2 finger PF14634:zinc-RING finger domain PF12678:RING-H2 zinc finger domain PF13639:Ring finger domain}
transcript_HQ_SAB_transcript13139/f3p0/2055	6.2201e-07	2.028e-06	{KNA13049.1; hypothetical protein SOVF_120280 [Spinacia oleracea]}	{sp|Q84RR2|ARI2_ARATH; Probable E3 ubiquitin-protein ligase ARI2 OS=Arabidopsis thaliana GN=ARI2 PE=2 SV=1}	{nnu:104595795; K11968 ARIH1 ariadne-1 2.3.2.27 -}	{At4g34370; KOG1815 Predicted E3 ubiquitin ligase O Posttranslational modification, protein turnover, chaperones ;}	{NA}	{NA}	{NA}
transcript_HQ_SAB_transcript10547/f2p0/2257	3.5477e-17	2.0926e-16	{XP_010682363.1; PREDICTED: Probable E3 ubiquitin-protein ligase HERC4 [Beta vulgaris subsp. vulgaris]}	{sp|O95714|HERC2_HUMAN; E3 ubiquitin-protein ligase HERC2 OS=Homo sapiens GN=HERC2 PE=1 SV=2}	{vvi:100247438; - - - - -}	{At3g26100; KOG1426 FOG: RCC1 domain S Function unknown ;}	{NA}	{XM_010684062.2; PREDICTED: Beta vulgaris subsp. vulgaris Probable E3 ubiquitin-protein ligase HERC4 (LOC104897229), transcript variant X2, mRNA}	{NA}
transcript_HQ_BAB_transcript9698/f2p0/2601	1.6195e-05	4.6101e-05	{XP_010675444.1; PREDICTED: Probable E3 ubiquitin-protein ligase HIP1 [Beta vulgaris subsp. vulgaris]}	{sp|Q7XTV7|HIP1_ORYSJ; Probable E3 ubiquitin-protein ligase HIP1 OS=Oryza sativa subsp. japonica GN=HIP1 PE=1 SV=2}	{bvg:104891445; K10635 RNF111 E3 ubiquitin-protein ligase Arkadia 2.3.2.27 -}	{At3g15070; KOG0800 FOG: Predicted E3 ubiquitin ligase O Posttranslational modification, protein turnover, chaperones ;}	{GO:0005680; anaphase-promoting complex; cellular_component GO:0008270; zinc ion binding; molecular_function GO:0004842; ubiquitin-protein ligase activity; molecular_function GO:0046872; metal ion binding; molecular_function GO:0005515; protein binding; molecular_function}	{NA}	{PF00097:Zinc finger, C3HC4 type (RING finger) PF12906:RING-variant domain PF13639:Ring finger domain PF12678:RING-H2 zinc finger domain PF17123:RING-like zinc finger PF00628:PHD-finger PF12861:Anaphase-promoting complex subunit 11 RING-H2 finger PF14634:zinc-RING finger domain}
transcript_HQ_BAB_transcript9360/f3p0/2647	5.9653e-10	2.4205e-09	{XP_010687703.1; PREDICTED: Probable E3 ubiquitin-protein ligase XBOS32 [Beta vulgaris subsp. vulgaris]}	{sp|Q6NLQ8|XB32_ARATH; E3 ubiquitin-protein ligase XBAT32 OS=Arabidopsis thaliana GN=XBAT32 PE=1 SV=1}	{vvi:100263815; K19044 XBAT32_33 E3 ubiquitin-protein ligase XBAT32/33 2.3.2.27 -}	{NA}	{GO:0046872; metal ion binding; molecular_function GO:0008270; zinc ion binding; molecular_function GO:0005515; protein binding; molecular_function}	{XM_010689401.2; PREDICTED: Beta vulgaris subsp. vulgaris Probable E3 ubiquitin-protein ligase XBOS32 (LOC104901788), transcript variant X1, mRNA}	{PF13639:Ring finger domain PF00097:Zinc finger, C3HC4 type (RING finger) PF13606:Ankyrin repeat PF00023:Ankyrin repeat}
transcript_HQ_BAB_transcript9133/f2p0/2670	1.0499e-25	8.317e-25	{KNA05952.1; hypothetical protein SOVF_185600 isoform A [Spinacia oleracea]}	{sp|Q8W468|ARI8_ARATH; Probable E3 ubiquitin-protein ligase ARI8 OS=Arabidopsis thaliana GN=ARI8 PE=2 SV=1}	{bvg:104890186; K11968 ARIH1 ariadne-1 2.3.2.27 -}	{At1g65430; KOG1815 Predicted E3 ubiquitin ligase O Posttranslational modification, protein turnover, chaperones ;}	{GO:0008270; zinc ion binding; molecular_function GO:0016514; SWI/SNF complex; cellular_component GO:0005634; nucleus; cellular_component GO:0046872; metal ion binding; molecular_function GO:0005515; protein binding; molecular_function GO:0006338; chromatin remodeling; biological_process GO:0016586; RSC complex; cellular_component}	{XM_010675577.2; PREDICTED: Beta vulgaris subsp. vulgaris Probable E3 ubiquitin-protein ligase ARI8 (LOC104890186), transcript variant X1, mRNA}	{PF00097:Zinc finger, C3HC4 type (RING finger) PF09510:Rtt102p-like transcription regulator protein PF13639:Ring finger domain PF14634:zinc-RING finger domain}
transcript_HQ_BAB_transcript8389/f3p0/2825	1.6942e-07	5.7911e-07	{XP_019106391.1; PREDICTED: Probable E3 ubiquitin-protein ligase BAH1-like 1 isoform X2 [Beta vulgaris subsp. vulgaris]}	{sp|B8B5U8|BAHL2_ORYSI; Probable E3 ubiquitin-protein ligase BAH1-like 1 OS=Oryza sativa subsp. indica GN=OsI_27296 PE=3 SV=1}	{rcu:8259852; K16275 BAH, NLA E3 ubiquitin-protein ligase BAH 2.3.2.27 -}	{NA}	{GO:0005515; protein binding; molecular_function GO:0008270; zinc ion binding; molecular_function GO:0046872; metal ion binding; molecular_function}	{XM_019250846.1; PREDICTED: Beta vulgaris subsp. vulgaris Probable E3 ubiquitin-protein ligase BAH1-like 1 (LOC104899080), transcript variant X2, mRNA}	{PF14634:zinc-RING finger domain PF17123:RING-like zinc finger PF13465:Zinc-finger double domain PF13639:Ring finger domain PF00097:Zinc finger, C3HC4 type (RING finger)}
transcript_HQ_BAB_transcript437/f3p0/4891	0.020556	0.037848	{XP_010673731.1; PREDICTED: uncharacterized protein LOC104890071 [Beta vulgaris subsp. vulgaris]}	{sp|Q15751|HERC1_HUMAN; Probable E3 ubiquitin-protein ligase HERC1 OS=Homo sapiens GN=HERC1 PE=1 SV=2}	{bvg:104890071; - - - - -}	{NA}	{GO:0032065; cortical protein anchoring; biological_process GO:0005515; protein binding; molecular_function GO:0005938; cell cortex; cellular_component GO:0046872; metal ion binding; molecular_function GO:0005543; phospholipid binding; molecular_function}	{XM_010675429.2; PREDICTED: Beta vulgaris subsp. vulgaris hypothetical protein (LOC104890071), mRNA}	{PF01363:FYVE zinc finger PF12814:Meiotic cell cortex C-terminal pleckstrin homology}
transcript_HQ_BAB_transcript20237/f3p0/1132	1.6175e-08	5.9557e-08	{XP_010682265.1; PREDICTED: Probable E3 ubiquitin-protein ligase XERICO [Beta vulgaris subsp. vulgaris]}	{sp|Q9SI09|XERIC_ARATH; Probable E3 ubiquitin-protein ligase XERICO OS=Arabidopsis thaliana GN=XERICO PE=1 SV=1}	{vvi:100852957; K16285 XERICO RING/U-box domain-containing protein 2.3.2.27 -}	{At2g04240; KOG0800 FOG: Predicted E3 ubiquitin ligase O Posttranslational modification, protein turnover, chaperones ;}	{GO:0004842; ubiquitin-protein ligase activity; molecular_function GO:0046872; metal ion binding; molecular_function GO:0008270; zinc ion binding; molecular_function GO:0005680; anaphase-promoting complex; cellular_component GO:0005515; protein binding; molecular_function}	{XM_010683963.2; PREDICTED: Beta vulgaris subsp. vulgaris Probable E3 ubiquitin-protein ligase XERICO (LOC104897136), mRNA}	{PF14634:zinc-RING finger domain PF12861:Anaphase-promoting complex subunit 11 RING-H2 finger PF17123:RING-like zinc finger PF13639:Ring finger domain PF12678:RING-H2 zinc finger domain PF17122:Zinc-finger PF12906:RING-variant domain PF00097:Zinc finger, C3HC4 type (RING finger)}
transcript_HQ_BAB_transcript17254/f2p0/1801	4.4487e-18	2.7134e-17	{XP_010684105.1; PREDICTED: Probable E3 ubiquitin-protein ligase LOG2 [Beta vulgaris subsp. vulgaris]}	{sp|Q9S752|LOFG2_ARATH; Probable E3 ubiquitin-protein ligase LOG2 OS=Arabidopsis thaliana GN=LOG2 PE=1 SV=1}	{mdm:103450060; - - - - -}	{At3g09770; KOG4265 Predicted E3 ubiquitin ligase O Posttranslational modification, protein turnover, chaperones ;}	{GO:0005515; protein binding; molecular_function GO:0003723; RNA binding; molecular_function GO:0008270; zinc ion binding; molecular_function}	{XM_010685803.2; PREDICTED: Beta vulgaris subsp. vulgaris Probable E3 ubiquitin-protein ligase LOG2 (LOC104898700), mRNA}	{PF03854:P-11 zinc finger PF13639:Ring finger domain PF14634:zinc-RING finger domain PF17123:RING-like zinc finger}
transcript_HQ_BAB_transcript15217/f4p0/1983	2.0387e-19	1.3112e-18	{KNA09140.1; hypothetical protein SOVF_156260 [Spinacia oleracea]}	{sp|Q9SNB6|RDUF1_ARATH; E3 ubiquitin-protein ligase RDUF1 OS=Arabidopsis thaliana GN=RDUF1 PE=1 SV=1}	{bvg:104904405; K11982 RNF115_126 E3 ubiquitin-protein ligase RNF115/126 2.3.2.27 -}	{At3g46620; KOG0800 FOG: Predicted E3 ubiquitin ligase O Posttranslational modification, protein turnover, chaperones ;}	{GO:0016151; nickel ion binding; molecular_function GO:0035556; intracellular signal transduction; biological_process GO:0004842; ubiquitin-protein ligase activity; molecular_function GO:0046872; metal ion binding; molecular_function GO:0005680; anaphase-promoting complex; cellular_component GO:0008270; zinc ion binding; molecular_function GO:0006464; protein modification process; biological_proc…	{XM_010692651.2; PREDICTED: Beta vulgaris subsp. vulgaris Probable E3 ubiquitin-protein ligase RHC2A (LOC104904405), mRNA}	{PF00097:Zinc finger, C3HC4 type (RING finger) PF13639:Ring finger domain PF12678:RING-H2 zinc finger domain PF17123:RING-like zinc finger PF00130:Phorbol esters/diacylglycerol binding domain (C1 domain) PF12861:Anaphase-promoting complex subunit 11 RING-H2 finger PF01155:Hydrogenase/urease nickel incorporation, metallochaperone, hypA PF14634:zinc-RING finger domain}
transcript_HQ_BAB_transcript14829/f3p0/2044	0.00016437	0.00041616	{KNA25649.1; hypothetical protein SOVF_004680 [Spinacia oleracea]}	{sp|Q7XTV7|HIP1_ORYSJ; Probable E3 ubiquitin-protein ligase HIP1 OS=Oryza sativa subsp. japonica GN=HIP1 PE=1 SV=2}	{bvg:104886539; - - - - -}	{At5g24870; KOG0800 FOG: Predicted E3 ubiquitin ligase O Posttranslational modification, protein turnover, chaperones ;}	{GO:0005515; protein binding; molecular_function GO:0005680; anaphase-promoting complex; cellular_component GO:0008270; zinc ion binding; molecular_function GO:0046872; metal ion binding; molecular_function GO:0004842; ubiquitin-protein ligase activity; molecular_function}	{XM_010670987.2; PREDICTED: Beta vulgaris subsp. vulgaris Probable E3 ubiquitin-protein ligase RHG1A (LOC104886539), transcript variant X1, mRNA}	{PF17123:RING-like zinc finger PF14634:zinc-RING finger domain PF13639:Ring finger domain PF12678:RING-H2 zinc finger domain PF00097:Zinc finger, C3HC4 type (RING finger) PF00628:PHD-finger PF12861:Anaphase-promoting complex subunit 11 RING-H2 finger}
transcript_HQ_BAB_transcript14711/f2p0/2043	5.4081e-09	2.0537e-08	{XP_010675444.1; PREDICTED: Probable E3 ubiquitin-protein ligase HIP1 [Beta vulgaris subsp. vulgaris]}	{sp|Q7XTV7|HIP1_ORYSJ; Probable E3 ubiquitin-protein ligase HIP1 OS=Oryza sativa subsp. japonica GN=HIP1 PE=1 SV=2}	{bvg:104891445; K10635 RNF111 E3 ubiquitin-protein ligase Arkadia 2.3.2.27 -}	{At3g15070; KOG0800 FOG: Predicted E3 ubiquitin ligase O Posttranslational modification, protein turnover, chaperones ;}	{GO:0005515; protein binding; molecular_function GO:0008270; zinc ion binding; molecular_function GO:0005680; anaphase-promoting complex; cellular_component GO:0046872; metal ion binding; molecular_function GO:0004842; ubiquitin-protein ligase activity; molecular_function}	{NA}	{PF00628:PHD-finger PF12861:Anaphase-promoting complex subunit 11 RING-H2 finger PF14634:zinc-RING finger domain PF12906:RING-variant domain PF00097:Zinc finger, C3HC4 type (RING finger) PF13639:Ring finger domain PF12678:RING-H2 zinc finger domain PF17123:RING-like zinc finger}
transcript_HQ_BAB_transcript13285/f5p0/2138	3.9191e-22	2.7711e-21	{XP_010682363.1; PREDICTED: Probable E3 ubiquitin-protein ligase HERC4 [Beta vulgaris subsp. vulgaris]}	{sp|O95714|HERC2_HUMAN; E3 ubiquitin-protein ligase HERC2 OS=Homo sapiens GN=HERC2 PE=1 SV=2}	{vvi:100247438; - - - - -}	{At3g26100; KOG1426 FOG: RCC1 domain S Function unknown ;}	{NA}	{XM_010684062.2; PREDICTED: Beta vulgaris subsp. vulgaris Probable E3 ubiquitin-protein ligase HERC4 (LOC104897229), transcript variant X2, mRNA}	{NA}
transcript_HQ_BAB_transcript13120/f2p0/2221	7.5449e-78	1.6333e-76	{XP_010682363.1; PREDICTED: Probable E3 ubiquitin-protein ligase HERC4 [Beta vulgaris subsp. vulgaris]}	{sp|O95714|HERC2_HUMAN; E3 ubiquitin-protein ligase HERC2 OS=Homo sapiens GN=HERC2 PE=1 SV=2}	{vvi:100247438; - - - - -}	{At3g26100; KOG1426 FOG: RCC1 domain S Function unknown ;}	{NA}	{XM_010684062.2; PREDICTED: Beta vulgaris subsp. vulgaris Probable E3 ubiquitin-protein ligase HERC4 (LOC104897229), transcript variant X2, mRNA}	{NA}
transcript_HQ_BAB_transcript12400/f6p0/2244	4.6036e-41	5.4766e-40	{XP_010693494.1; PREDICTED: Probable E3 ubiquitin-protein ligase ARI8 [Beta vulgaris subsp. vulgaris]}	{sp|Q8W468|ARI8_ARATH; Probable E3 ubiquitin-protein ligase ARI8 OS=Arabidopsis thaliana GN=ARI8 PE=2 SV=1}	{jcu:105629233; K11968 ARIH1 ariadne-1 2.3.2.27 -}	{At1g65430; KOG1815 Predicted E3 ubiquitin ligase O Posttranslational modification, protein turnover, chaperones ;}	{GO:0006397; mRNA processing; biological_process GO:0046872; metal ion binding; molecular_function}	{NA}	{PF00097:Zinc finger, C3HC4 type (RING finger) PF01480:PWI domain}
transcript_HQ_BAB_transcript1219/f3p0/4258	3.5438e-34	3.5603e-33	{XP_010680417.1; PREDICTED: uncharacterized protein LOC104895565 [Beta vulgaris subsp. vulgaris]}	{sp|Q9VR91|HERC2_DROME; Probable E3 ubiquitin-protein ligase HERC2 OS=Drosophila melanogaster GN=HERC2 PE=1 SV=3}	{bvg:104895565; - - - - -}	{NA}	{GO:0008608; attachment of spindle microtubules to kinetochore; biological_process GO:0042729; DASH complex; cellular_component GO:0005876; spindle microtubule; cellular_component GO:0046872; metal ion binding; molecular_function}	{XM_010682115.2; PREDICTED: Beta vulgaris subsp. vulgaris hypothetical protein (LOC104895565), mRNA}	{PF08287:Spc19 PF01363:FYVE zinc finger}
transcript_HQ_BAB_transcript11410/f7p0/2378	3.861e-12	1.7862e-11	{XP_010671821.1; PREDICTED: Probable E3 ubiquitin-protein ligase ARI7 isoform X1 [Beta vulgaris subsp. vulgaris]}	{sp|Q8W468|ARI8_ARATH; Probable E3 ubiquitin-protein ligase ARI8 OS=Arabidopsis thaliana GN=ARI8 PE=2 SV=1}	{bvg:104888512; K11968 ARIH1 ariadne-1 2.3.2.27 -}	{At1g65430; KOG1815 Predicted E3 ubiquitin ligase O Posttranslational modification, protein turnover, chaperones ;}	{GO:0055114; oxidation-reduction process; biological_process GO:0006338; chromatin remodeling; biological_process GO:0016586; RSC complex; cellular_component GO:0016491; oxidoreductase activity; molecular_function GO:0005515; protein binding; molecular_function GO:0046872; metal ion binding; molecular_function GO:0005634; nucleus; cellular_component GO:0016514; SWI/SNF complex; cellular_component…	{XM_010673519.2; PREDICTED: Beta vulgaris subsp. vulgaris Probable E3 ubiquitin-protein ligase ARI7 (LOC104888512), transcript variant X1, mRNA}	{PF09510:Rtt102p-like transcription regulator protein PF13639:Ring finger domain PF14634:zinc-RING finger domain PF01232:Mannitol dehydrogenase Rossmann domain PF00097:Zinc finger, C3HC4 type (RING finger)}
transcript_HQ_BAB_transcript1036/f9p0/4307	0.01649	0.030951	{XP_010673731.1; PREDICTED: uncharacterized protein LOC104890071 [Beta vulgaris subsp. vulgaris]}	{sp|Q15751|HERC1_HUMAN; Probable E3 ubiquitin-protein ligase HERC1 OS=Homo sapiens GN=HERC1 PE=1 SV=2}	{bvg:104890071; - - - - -}	{NA}	{GO:0032065; cortical protein anchoring; biological_process GO:0005515; protein binding; molecular_function GO:0005938; cell cortex; cellular_component GO:0046872; metal ion binding; molecular_function GO:0005543; phospholipid binding; molecular_function}	{XM_010675429.2; PREDICTED: Beta vulgaris subsp. vulgaris hypothetical protein (LOC104890071), mRNA}	{PF01363:FYVE zinc finger PF12814:Meiotic cell cortex C-terminal pleckstrin homology}
transcript_HQ_BAB_transcript10258/f5p0/2521	6.6006e-05	0.00017562	{XP_010684232.1; PREDICTED: Probable E3 ubiquitin-protein ligase ARI2 isoform X1 [Beta vulgaris subsp. vulgaris]}	{sp|Q84RR2|ARI2_ARATH; Probable E3 ubiquitin-protein ligase ARI2 OS=Arabidopsis thaliana GN=ARI2 PE=2 SV=1}	{bvg:104898820; K11968 ARIH1 ariadne-1 2.3.2.27 -}	{At4g34370; KOG1815 Predicted E3 ubiquitin ligase O Posttranslational modification, protein turnover, chaperones ;}	{GO:0005515; protein binding; molecular_function GO:0008270; zinc ion binding; molecular_function GO:0046872; metal ion binding; molecular_function}	{XM_010685930.2; PREDICTED: Beta vulgaris subsp. vulgaris Probable E3 ubiquitin-protein ligase ARI2 (LOC104898820), transcript variant X1, mRNA}	{PF13639:Ring finger domain PF14634:zinc-RING finger domain PF00097:Zinc finger, C3HC4 type (RING finger)}
transcript_HQ_SAB_transcript5891/f5p0/2747	5.051e-75	1.0473e-73	{XP_010666612.1; PREDICTED: zeaxanthin epoxidase, chloroplastic [Beta vulgaris subsp. vulgaris]}	{sp|O81360|ABA2_PRUAR; Zeaxanthin epoxidase, chloroplastic OS=Prunus armeniaca PE=2 SV=1}	{pper:PRUPE_ppa002248mg; K09838 ZEP, ABA1 zeaxanthin epoxidase 1.14.15.21 ko00906; Metabolism; Metabolism of terpenoids and polyketides; Carotenoid biosynthesis}	{At5g67030; KOG2614 Kynurenine 3-monooxygenase and related flavoprotein monooxygenases CR Energy production and conversion ; General function prediction only ;}	{GO:0055114; oxidation-reduction process; biological_process GO:0050660; flavin adenine dinucleotide binding; molecular_function GO:0016021; integral to membrane; cellular_component GO:0016491; oxidoreductase activity; molecular_function GO:0071949; FAD binding; molecular_function GO:0005515; protein binding; molecular_function GO:0004506; squalene monooxygenase activity; molecular_function}	{XM_010668310.2; PREDICTED: Beta vulgaris subsp. vulgaris zeaxanthin epoxidase, chloroplastic (LOC104883753), mRNA}	{PF01494:FAD binding domain PF12831:FAD dependent oxidoreductase PF08491:Squalene epoxidase PF07992:Pyridine nucleotide-disulphide oxidoreductase PF01266:FAD dependent oxidoreductase PF00498:FHA domain}
transcript_HQ_SAB_transcript21015/f4p0/1544	2.2786e-14	1.182e-13	{XP_010677116.1; PREDICTED: uncharacterized protein LOC104892808 [Beta vulgaris subsp. vulgaris]}	{sp|Q40412|ABA2_NICPL; Zeaxanthin epoxidase, chloroplastic OS=Nicotiana plumbaginifolia GN=ABA2 PE=1 SV=1}	{bvg:104892808; - - - - -}	{At2g35660; KOG2614 Kynurenine 3-monooxygenase and related flavoprotein monooxygenases CR Energy production and conversion ; General function prediction only ;}	{GO:0050660; flavin adenine dinucleotide binding; molecular_function GO:0055114; oxidation-reduction process; biological_process GO:0016021; integral to membrane; cellular_component GO:0071949; FAD binding; molecular_function GO:0004506; squalene monooxygenase activity; molecular_function}	{XM_010678814.2; PREDICTED: Beta vulgaris subsp. vulgaris FAD-dependent urate hydroxylase (LOC104892808), mRNA}	{PF08491:Squalene epoxidase PF01494:FAD binding domain}
transcript_HQ_BAB_transcript10066/f2p0/2558	7.1399e-11	3.0786e-10	{XP_010666612.1; PREDICTED: zeaxanthin epoxidase, chloroplastic [Beta vulgaris subsp. vulgaris]}	{sp|O81360|ABA2_PRUAR; Zeaxanthin epoxidase, chloroplastic OS=Prunus armeniaca PE=2 SV=1}	{pper:PRUPE_ppa002248mg; K09838 ZEP, ABA1 zeaxanthin epoxidase 1.14.15.21 ko00906; Metabolism; Metabolism of terpenoids and polyketides; Carotenoid biosynthesis}	{At5g67030; KOG2614 Kynurenine 3-monooxygenase and related flavoprotein monooxygenases CR Energy production and conversion ; General function prediction only ;}	{GO:0016021; integral to membrane; cellular_component GO:0004506; squalene monooxygenase activity; molecular_function GO:0071949; FAD binding; molecular_function GO:0055114; oxidation-reduction process; biological_process GO:0050660; flavin adenine dinucleotide binding; molecular_function GO:0016491; oxidoreductase activity; molecular_function}	{XM_010668310.2; PREDICTED: Beta vulgaris subsp. vulgaris zeaxanthin epoxidase, chloroplastic (LOC104883753), mRNA}	{PF01266:FAD dependent oxidoreductase PF12831:FAD dependent oxidoreductase PF08491:Squalene epoxidase PF07992:Pyridine nucleotide-disulphide oxidoreductase PF01494:FAD binding domain}
transcript_HQ_SAB_transcript9879/f2p0/2308	1.6669e-05	4.7419e-05	{KNA16304.1; hypothetical protein SOVF_090430 [Spinacia oleracea]}	{sp|Q9FKL6|CB60B_ARATH; calmodulin-binding protein 60 B OS=Arabidopsis thaliana GN=CBP60B PE=2 SV=1}	{bvg:104890371; - - - - -}	{NA}	{GO:0005516; calmodulin binding; molecular_function GO:0006950; response to stress; biological_process}	{NA}	{PF07887:Calmodulin binding protein-like}
transcript_HQ_SAB_transcript916/f2p0/4082	0.0059793	0.012185	{KNA06482.1; hypothetical protein SOVF_180550 isoform A [Spinacia oleracea]}	{sp|Q8RXA7|SCD1_ARATH; DENN domain and WD repeat-containing protein SCD1 OS=Arabidopsis thaliana GN=SCD1 PE=1 SV=1}	{bvg:104893555; - - - - -}	{At1g49040; KOG2127 calmodulin-binding protein CRAG, contains DENN domain T Signal transduction mechanisms ;}	{GO:0005515; protein binding; molecular_function}	{XM_010679672.2; PREDICTED: Beta vulgaris subsp. vulgaris hypothetical protein (LOC104893555), transcript variant X1, mRNA}	{PF00400:WD domain, G-beta repeat}
transcript_HQ_SAB_transcript8369/f2p0/2457	4.2559e-05	0.0001158	{XP_010688497.1; PREDICTED: calmodulin-binding protein 60 D [Beta vulgaris subsp. vulgaris]}	{sp|Q9FKL6|CB60B_ARATH; calmodulin-binding protein 60 B OS=Arabidopsis thaliana GN=CBP60B PE=2 SV=1}	{cit:102625149; - - - - -}	{NA}	{GO:0005516; calmodulin binding; molecular_function GO:0006950; response to stress; biological_process}	{XM_010690195.2; PREDICTED: Beta vulgaris subsp. vulgaris hypothetical protein (LOC104902420), transcript variant X2, mRNA}	{PF07887:Calmodulin binding protein-like}
transcript_HQ_SAB_transcript7858/f6p0/2503	9.2787e-05	0.00024251	{XP_010688497.1; PREDICTED: calmodulin-binding protein 60 D [Beta vulgaris subsp. vulgaris]}	{sp|Q9FKL6|CB60B_ARATH; calmodulin-binding protein 60 B OS=Arabidopsis thaliana GN=CBP60B PE=2 SV=1}	{cit:102625149; - - - - -}	{NA}	{GO:0005516; calmodulin binding; molecular_function GO:0006950; response to stress; biological_process}	{XM_010690195.2; PREDICTED: Beta vulgaris subsp. vulgaris hypothetical protein (LOC104902420), transcript variant X2, mRNA}	{PF07887:Calmodulin binding protein-like}
transcript_HQ_SAB_transcript7582/f6p0/2508	6.491e-07	2.1138e-06	{KNA08468.1; hypothetical protein SOVF_162320 [Spinacia oleracea]}	{sp|C0SVV6|CB60A_ARATH; calmodulin-binding protein 60 A OS=Arabidopsis thaliana GN=CBP60A PE=2 SV=1}	{bvg:104894210; - - - - -}	{NA}	{GO:0006950; response to stress; biological_process GO:0005516; calmodulin binding; molecular_function}	{XM_010680395.2; PREDICTED: Beta vulgaris subsp. vulgaris hypothetical protein (LOC104894210), mRNA}	{PF07887:Calmodulin binding protein-like}
transcript_HQ_SAB_transcript7504/f2p0/2560	0.0031973	0.0068098	{XP_010674139.1; PREDICTED: calmodulin-binding protein 60 B-like [Beta vulgaris subsp. vulgaris]}	{sp|Q9FKL6|CB60B_ARATH; calmodulin-binding protein 60 B OS=Arabidopsis thaliana GN=CBP60B PE=2 SV=1}	{bvg:104890371; - - - - -}	{NA}	{GO:0008270; zinc ion binding; molecular_function GO:0006950; response to stress; biological_process GO:0005516; calmodulin binding; molecular_function}	{NA}	{PF07887:Calmodulin binding protein-like PF07503:HypF finger}
transcript_HQ_SAB_transcript6634/f2p0/2668	0.0033647	0.0071359	{XP_010684660.1; PREDICTED: tetratricopeptide repeat protein 7A isoform X2 [Beta vulgaris subsp. vulgaris]}	{sp|Q66GN3|NPGR2_ARATH; Protein NPGR2 OS=Arabidopsis thaliana GN=NPGR2 PE=1 SV=1}	{pper:PRUPE_ppa001953mg; - - - - -}	{At4g28600; KOG4162 Predicted calmodulin-binding protein T Signal transduction mechanisms ;}	{GO:0005515; protein binding; molecular_function}	{XM_010686358.2; PREDICTED: Beta vulgaris subsp. vulgaris tetratricopeptide repeat protein 7A (LOC104899209), transcript variant X2, mRNA}	{PF13414:TPR repeat PF13181:Tetratricopeptide repeat PF13176:Tetratricopeptide repeat PF00515:Tetratricopeptide repeat PF13371:Tetratricopeptide repeat}
transcript_HQ_SAB_transcript6487/f2p0/2681	2.4574e-41	2.9334e-40	{XP_010674159.1; PREDICTED: protein SAR DEFICIENT 1 isoform X1 [Beta vulgaris subsp. vulgaris]}	{sp|C0SV51|CB60C_ARATH; calmodulin-binding protein 60 C OS=Arabidopsis thaliana GN=CBP60C PE=2 SV=1}	{bvg:104890389; - - - - -}	{NA}	{GO:0005516; calmodulin binding; molecular_function GO:0006950; response to stress; biological_process}	{NA}	{PF07887:Calmodulin binding protein-like}
transcript_HQ_SAB_transcript5232/f4p0/2856	1.072e-11	4.8353e-11	{XP_010696620.1; PREDICTED: calmodulin-binding protein 60 B isoform X1 [Beta vulgaris subsp. vulgaris]}	{sp|Q9FKL6|CB60B_ARATH; calmodulin-binding protein 60 B OS=Arabidopsis thaliana GN=CBP60B PE=2 SV=1}	{cit:102626942; - - - - -}	{NA}	{GO:0005516; calmodulin binding; molecular_function GO:0006950; response to stress; biological_process}	{XM_019247192.1; PREDICTED: Beta vulgaris subsp. vulgaris hypothetical protein isoform B (LOC104909117), transcript variant X2, mRNA}	{PF07887:Calmodulin binding protein-like}
transcript_HQ_SAB_transcript4035/f12p0/2922	0.0050574	0.010431	{XP_010696620.1; PREDICTED: calmodulin-binding protein 60 B isoform X1 [Beta vulgaris subsp. vulgaris]}	{sp|Q9FKL6|CB60B_ARATH; calmodulin-binding protein 60 B OS=Arabidopsis thaliana GN=CBP60B PE=2 SV=1}	{cit:102626942; - - - - -}	{NA}	{GO:0005516; calmodulin binding; molecular_function GO:0006950; response to stress; biological_process}	{XM_019247192.1; PREDICTED: Beta vulgaris subsp. vulgaris hypothetical protein isoform B (LOC104909117), transcript variant X2, mRNA}	{PF07887:Calmodulin binding protein-like}
transcript_HQ_SAB_transcript27329/f3p0/1118	3.8521e-52	5.609e-51	{KNA20136.1; hypothetical protein SOVF_055170 [Spinacia oleracea]}	{sp|O80683|CAB25_ARATH; calmodulin-binding protein 25 OS=Arabidopsis thaliana GN=CAMBP25 PE=1 SV=1}	{bvg:104889622; - - - - -}	{NA}	{GO:0016021; integral to membrane; cellular_component}	{XM_010674880.2; PREDICTED: Beta vulgaris subsp. vulgaris calmodulin-binding protein 25 (LOC104889622), mRNA}	{PF09726:Transmembrane protein}
transcript_HQ_SAB_transcript23075/f3p0/1430	1.7466e-10	7.3318e-10	{KNA20136.1; hypothetical protein SOVF_055170 [Spinacia oleracea]}	{sp|O80683|CAB25_ARATH; calmodulin-binding protein 25 OS=Arabidopsis thaliana GN=CAMBP25 PE=1 SV=1}	{bvg:104889622; - - - - -}	{NA}	{GO:0016021; integral to membrane; cellular_component}	{XM_010674880.2; PREDICTED: Beta vulgaris subsp. vulgaris calmodulin-binding protein 25 (LOC104889622), mRNA}	{PF09726:Transmembrane protein}
transcript_HQ_SAB_transcript18098/f2p0/1800	0.02701	0.048522	{XP_010674129.1; PREDICTED: calmodulin-binding protein 60 A isoform X2 [Beta vulgaris subsp. vulgaris]}	{sp|Q9FKL6|CB60B_ARATH; calmodulin-binding protein 60 B OS=Arabidopsis thaliana GN=CBP60B PE=2 SV=1}	{bvg:104890364; - - - - -}	{NA}	{GO:0006950; response to stress; biological_process GO:0005516; calmodulin binding; molecular_function}	{XM_010675828.2; PREDICTED: Beta vulgaris subsp. vulgaris hypothetical protein isoform A (LOC104890364), transcript variant X3, mRNA}	{PF07887:Calmodulin binding protein-like}
transcript_HQ_SAB_transcript16823/f3p0/1812	0.00078064	0.0018177	{XP_010674139.1; PREDICTED: calmodulin-binding protein 60 B-like [Beta vulgaris subsp. vulgaris]}	{sp|Q9FKL6|CB60B_ARATH; calmodulin-binding protein 60 B OS=Arabidopsis thaliana GN=CBP60B PE=2 SV=1}	{bvg:104890371; - - - - -}	{NA}	{GO:0008270; zinc ion binding; molecular_function GO:0006950; response to stress; biological_process GO:0030570; pectate lyase activity; molecular_function GO:0005516; calmodulin binding; molecular_function}	{NA}	{PF07503:HypF finger PF07887:Calmodulin binding protein-like PF04431:Pectate lyase, N terminus}
transcript_HQ_SAB_transcript15035/f2p0/1913	9.6641e-35	9.8165e-34	{XP_010674159.1; PREDICTED: protein SAR DEFICIENT 1 isoform X1 [Beta vulgaris subsp. vulgaris]}	{sp|Q0WVV6|CB60D_ARATH; calmodulin-binding protein 60 D OS=Arabidopsis thaliana GN=CBP60D PE=2 SV=1}	{bvg:104890389; - - - - -}	{NA}	{GO:0005516; calmodulin binding; molecular_function GO:0006950; response to stress; biological_process}	{NA}	{PF07887:Calmodulin binding protein-like}
transcript_HQ_SAB_transcript14742/f3p0/1943	1.3961e-07	4.8071e-07	{XP_010674159.1; PREDICTED: protein SAR DEFICIENT 1 isoform X1 [Beta vulgaris subsp. vulgaris]}	{sp|C0SV51|CB60C_ARATH; calmodulin-binding protein 60 C OS=Arabidopsis thaliana GN=CBP60C PE=2 SV=1}	{bvg:104890389; - - - - -}	{NA}	{GO:0005516; calmodulin binding; molecular_function GO:0006950; response to stress; biological_process}	{NA}	{PF07887:Calmodulin binding protein-like}
transcript_HQ_SAB_transcript14578/f11p0/1923	1.6869e-47	2.25e-46	{KNA18488.1; hypothetical protein SOVF_070300 [Spinacia oleracea]}	{sp|Q9FKL6|CB60B_ARATH; calmodulin-binding protein 60 B OS=Arabidopsis thaliana GN=CBP60B PE=2 SV=1}	{bvg:104890364; - - - - -}	{NA}	{GO:0005516; calmodulin binding; molecular_function GO:0006950; response to stress; biological_process}	{XM_010675827.2; PREDICTED: Beta vulgaris subsp. vulgaris hypothetical protein isoform A (LOC104890364), transcript variant X2, mRNA}	{PF07887:Calmodulin binding protein-like}
transcript_HQ_SAB_transcript14104/f2p0/1982	2.0112e-12	9.4619e-12	{XP_010674159.1; PREDICTED: protein SAR DEFICIENT 1 isoform X1 [Beta vulgaris subsp. vulgaris]}	{sp|C0SV51|CB60C_ARATH; calmodulin-binding protein 60 C OS=Arabidopsis thaliana GN=CBP60C PE=2 SV=1}	{bvg:104890389; - - - - -}	{NA}	{GO:0006950; response to stress; biological_process GO:0005516; calmodulin binding; molecular_function}	{NA}	{PF07887:Calmodulin binding protein-like}
transcript_HQ_SAB_transcript12990/f2p0/2054	1.8033e-25	1.4164e-24	{KNA16304.1; hypothetical protein SOVF_090430 [Spinacia oleracea]}	{sp|Q9FKL6|CB60B_ARATH; calmodulin-binding protein 60 B OS=Arabidopsis thaliana GN=CBP60B PE=2 SV=1}	{bvg:104890371; - - - - -}	{NA}	{GO:0005516; calmodulin binding; molecular_function GO:0006950; response to stress; biological_process GO:0008270; zinc ion binding; molecular_function}	{NA}	{PF07887:Calmodulin binding protein-like PF07503:HypF finger}
transcript_HQ_SAB_transcript12195/f2p0/2135	1.9978e-06	6.2283e-06	{XP_010674159.1; PREDICTED: protein SAR DEFICIENT 1 isoform X1 [Beta vulgaris subsp. vulgaris]}	{sp|C0SV51|CB60C_ARATH; calmodulin-binding protein 60 C OS=Arabidopsis thaliana GN=CBP60C PE=2 SV=1}	{bvg:104890389; - - - - -}	{NA}	{GO:0006950; response to stress; biological_process GO:0005516; calmodulin binding; molecular_function}	{NA}	{PF07887:Calmodulin binding protein-like}
transcript_HQ_SAB_transcript11031/f2p0/2203	1.2248e-08	4.5391e-08	{XP_010677974.1; PREDICTED: DENN domain and WD repeat-containing protein SCD1 isoform X1 [Beta vulgaris subsp. vulgaris]}	{sp|Q8RXA7|SCD1_ARATH; DENN domain and WD repeat-containing protein SCD1 OS=Arabidopsis thaliana GN=SCD1 PE=1 SV=1}	{bvg:104893555; - - - - -}	{At1g49040; KOG2127 calmodulin-binding protein CRAG, contains DENN domain T Signal transduction mechanisms ;}	{GO:0005515; protein binding; molecular_function}	{XM_010679672.2; PREDICTED: Beta vulgaris subsp. vulgaris hypothetical protein (LOC104893555), transcript variant X1, mRNA}	{PF00400:WD domain, G-beta repeat}
transcript_HQ_BAB_transcript9073/f3p0/2701	1.1629e-08	4.3171e-08	{KNA17343.1; hypothetical protein SOVF_080500 [Spinacia oleracea]}	{sp|Q9CB03|NPGR1_ARATH; Protein NPGR1 OS=Arabidopsis thaliana GN=NPGR1 PE=1 SV=1}	{bvg:104902028; - - - - -}	{At1g27460; KOG4162 Predicted calmodulin-binding protein T Signal transduction mechanisms ;}	{GO:0005515; protein binding; molecular_function}	{XM_010689711.2; PREDICTED: Beta vulgaris subsp. vulgaris tetratricopeptide repeat protein 7B (LOC104902028), transcript variant X2, mRNA}	{PF13181:Tetratricopeptide repeat PF13371:Tetratricopeptide repeat PF00515:Tetratricopeptide repeat PF13414:TPR repeat}
transcript_HQ_BAB_transcript6387/f4p0/3053	1.6037e-05	4.5696e-05	{XP_010696620.1; PREDICTED: calmodulin-binding protein 60 B isoform X1 [Beta vulgaris subsp. vulgaris]}	{sp|Q9FKL6|CB60B_ARATH; calmodulin-binding protein 60 B OS=Arabidopsis thaliana GN=CBP60B PE=2 SV=1}	{cit:102626942; - - - - -}	{NA}	{GO:0006950; response to stress; biological_process GO:0005516; calmodulin binding; molecular_function}	{XM_019247192.1; PREDICTED: Beta vulgaris subsp. vulgaris hypothetical protein isoform B (LOC104909117), transcript variant X2, mRNA}	{PF07887:Calmodulin binding protein-like}
transcript_HQ_BAB_transcript19019/f2p0/1518	0.00061899	0.0014616	{KNA05463.1; hypothetical protein SOVF_190150, partial [Spinacia oleracea]}	{sp|Q9FKL6|CB60B_ARATH; calmodulin-binding protein 60 B OS=Arabidopsis thaliana GN=CBP60B PE=2 SV=1}	{bvg:104890365; - - - - -}	{NA}	{GO:0005516; calmodulin binding; molecular_function GO:0006950; response to stress; biological_process}	{XM_010675844.2; PREDICTED: Beta vulgaris subsp. vulgaris calmodulin-binding protein 60 D-like (LOC104890378), mRNA}	{PF07887:Calmodulin binding protein-like}
transcript_HQ_BAB_transcript16277/f5p0/1875	3.47e-105	1.0656e-103	{XP_010674159.1; PREDICTED: protein SAR DEFICIENT 1 isoform X1 [Beta vulgaris subsp. vulgaris]}	{sp|C0SV51|CB60C_ARATH; calmodulin-binding protein 60 C OS=Arabidopsis thaliana GN=CBP60C PE=2 SV=1}	{bvg:104890389; - - - - -}	{NA}	{GO:0005516; calmodulin binding; molecular_function GO:0006950; response to stress; biological_process}	{NA}	{PF07887:Calmodulin binding protein-like}
transcript_HQ_BAB_transcript16262/f2p0/1893	0.021837	0.039973	{KNA18488.1; hypothetical protein SOVF_070300 [Spinacia oleracea]}	{sp|Q9FKL6|CB60B_ARATH; calmodulin-binding protein 60 B OS=Arabidopsis thaliana GN=CBP60B PE=2 SV=1}	{bvg:104890364; - - - - -}	{NA}	{GO:0006950; response to stress; biological_process GO:0005516; calmodulin binding; molecular_function}	{XM_010675828.2; PREDICTED: Beta vulgaris subsp. vulgaris hypothetical protein isoform A (LOC104890364), transcript variant X3, mRNA}	{PF07887:Calmodulin binding protein-like}
transcript_HQ_BAB_transcript15988/f5p0/1896	6.3372e-22	4.4468e-21	{KNA18488.1; hypothetical protein SOVF_070300 [Spinacia oleracea]}	{sp|Q9FKL6|CB60B_ARATH; calmodulin-binding protein 60 B OS=Arabidopsis thaliana GN=CBP60B PE=2 SV=1}	{bvg:104890364; - - - - -}	{NA}	{GO:0006950; response to stress; biological_process GO:0005516; calmodulin binding; molecular_function}	{XM_010675828.2; PREDICTED: Beta vulgaris subsp. vulgaris hypothetical protein isoform A (LOC104890364), transcript variant X3, mRNA}	{PF07887:Calmodulin binding protein-like}
transcript_HQ_BAB_transcript14824/f2p0/2023	1.7706e-42	2.1562e-41	{KNA18488.1; hypothetical protein SOVF_070300 [Spinacia oleracea]}	{sp|Q9FKL6|CB60B_ARATH; calmodulin-binding protein 60 B OS=Arabidopsis thaliana GN=CBP60B PE=2 SV=1}	{bvg:104890364; - - - - -}	{NA}	{GO:0006950; response to stress; biological_process GO:0005516; calmodulin binding; molecular_function}	{XM_010675827.2; PREDICTED: Beta vulgaris subsp. vulgaris hypothetical protein isoform A (LOC104890364), transcript variant X2, mRNA}	{PF07887:Calmodulin binding protein-like}
transcript_HQ_BAB_transcript14586/f2p0/2052	3.0237e-14	1.5589e-13	{XP_010674159.1; PREDICTED: protein SAR DEFICIENT 1 isoform X1 [Beta vulgaris subsp. vulgaris]}	{sp|C0SV51|CB60C_ARATH; calmodulin-binding protein 60 C OS=Arabidopsis thaliana GN=CBP60C PE=2 SV=1}	{bvg:104890389; - - - - -}	{NA}	{GO:0006950; response to stress; biological_process GO:0005516; calmodulin binding; molecular_function}	{NA}	{PF07887:Calmodulin binding protein-like}
transcript_HQ_BAB_transcript14325/f2p0/2104	5.6702e-23	4.1368e-22	{XP_010674128.1; PREDICTED: calmodulin-binding protein 60 A isoform X1 [Beta vulgaris subsp. vulgaris]}	{sp|Q9FKL6|CB60B_ARATH; calmodulin-binding protein 60 B OS=Arabidopsis thaliana GN=CBP60B PE=2 SV=1}	{bvg:104890364; - - - - -}	{NA}	{GO:0006950; response to stress; biological_process GO:0005516; calmodulin binding; molecular_function}	{XM_010675827.2; PREDICTED: Beta vulgaris subsp. vulgaris hypothetical protein isoform A (LOC104890364), transcript variant X2, mRNA}	{PF07887:Calmodulin binding protein-like}
transcript_HQ_BAB_transcript11023/f2p0/2454	4.2804e-14	2.1919e-13	{XP_010674135.1; PREDICTED: calmodulin-binding protein 60 B-like [Beta vulgaris subsp. vulgaris]}	{sp|Q0WVV6|CB60D_ARATH; calmodulin-binding protein 60 D OS=Arabidopsis thaliana GN=CBP60D PE=2 SV=1}	{bvg:104890368; - - - - -}	{NA}	{GO:0005516; calmodulin binding; molecular_function GO:0006950; response to stress; biological_process}	{NA}	{PF07887:Calmodulin binding protein-like}
transcript_HQ_SAB_transcript27153/f5p0/1134	2.2457e-77	4.817e-76	{XP_010677151.1; PREDICTED: calcineurin B-like protein 1 [Beta vulgaris subsp. vulgaris]}	{sp|O81445|CNBL1_ARATH; Calcineurin B-like protein 1 OS=Arabidopsis thaliana GN=CBL1 PE=1 SV=3}	{bvg:104892839; K06268 PPP3R, CNB serine/threonine-protein phosphatase 2B regulatory subunit - ko04010; Environmental Information Processing; Signal transduction; MAPK signaling pathway | ko04310; Environmental Information Processing; Signal transduction; Wnt signaling pathway | ko04370; Environmental Information Processing; Signal transduction; VEGF signaling pathway | ko04020; Environmental Inf…	{At5g47100; KOG0034 Ca2+/calmodulin-dependent protein phosphatase (calcineurin subunit B), EF-Hand superfamily protein T Signal transduction mechanisms ;}	{GO:0005509; calcium ion binding; molecular_function GO:0000272; polysaccharide catabolic process; biological_process GO:0004553; hydrolase activity, hydrolyzing O-glycosyl compounds; molecular_function GO:0005578; proteinaceous extracellular matrix; cellular_component GO:0005515; protein binding; molecular_function GO:0007165; signal transduction; biological_process}	{XM_010678849.2; PREDICTED: Beta vulgaris subsp. vulgaris calcineurin B-like protein 1 (LOC104892839), transcript variant X1, mRNA}	{PF13202:EF hand PF10591:Secreted protein acidic and rich in cysteine Ca binding region PF13833:EF-hand domain pair PF00036:EF hand PF12763:Cytoskeletal-regulatory complex EF hand PF13405:EF-hand domain PF13499:EF-hand domain pair PF00404:Dockerin type I repeat}
transcript_HQ_SAB_transcript25886/f6p0/1186	0.002134	0.0046655	{XP_010675974.1; PREDICTED: calcineurin B-like protein 2 [Beta vulgaris subsp. vulgaris]}	{sp|Q3HRP5|CNBL2_ORYSJ; Calcineurin B-like protein 2 OS=Oryza sativa subsp. japonica GN=CBL2 PE=2 SV=1}	{bvg:104891887; K06268 PPP3R, CNB serine/threonine-protein phosphatase 2B regulatory subunit - ko04010; Environmental Information Processing; Signal transduction; MAPK signaling pathway | ko04310; Environmental Information Processing; Signal transduction; Wnt signaling pathway | ko04370; Environmental Information Processing; Signal transduction; VEGF signaling pathway | ko04020; Environmental Inf…	{At4g26570; KOG0034 Ca2+/calmodulin-dependent protein phosphatase (calcineurin subunit B), EF-Hand superfamily protein T Signal transduction mechanisms ;}	{GO:0007165; signal transduction; biological_process GO:0005515; protein binding; molecular_function GO:0005578; proteinaceous extracellular matrix; cellular_component GO:0005509; calcium ion binding; molecular_function}	{XM_010677672.2; PREDICTED: Beta vulgaris subsp. vulgaris calcineurin B-like protein 2 (LOC104891887), transcript variant X1, mRNA}	{PF00036:EF hand PF13833:EF-hand domain pair PF13202:EF hand PF12763:Cytoskeletal-regulatory complex EF hand PF10591:Secreted protein acidic and rich in cysteine Ca binding region PF13405:EF-hand domain PF13499:EF-hand domain pair}
transcript_HQ_BAB_transcript19580/f3p0/1381	7.618e-05	0.00020137	{KNA18163.1; hypothetical protein SOVF_073430 [Spinacia oleracea]}	{sp|Q3HRP0|CNBL7_ORYSJ; Calcineurin B-like protein 7 OS=Oryza sativa subsp. japonica GN=CBL7 PE=2 SV=1}	{bvg:104883533; K06268 PPP3R, CNB serine/threonine-protein phosphatase 2B regulatory subunit - ko04010; Environmental Information Processing; Signal transduction; MAPK signaling pathway | ko04310; Environmental Information Processing; Signal transduction; Wnt signaling pathway | ko04370; Environmental Information Processing; Signal transduction; VEGF signaling pathway | ko04020; Environmental Inf…	{At5g24270; KOG0034 Ca2+/calmodulin-dependent protein phosphatase (calcineurin subunit B), EF-Hand superfamily protein T Signal transduction mechanisms ;}	{GO:0005509; calcium ion binding; molecular_function GO:0005515; protein binding; molecular_function GO:0005578; proteinaceous extracellular matrix; cellular_component GO:0007165; signal transduction; biological_process}	{XM_010668144.2; PREDICTED: Beta vulgaris subsp. vulgaris calcineurin B-like protein 4 (LOC104883533), transcript variant X2, mRNA}	{PF13833:EF-hand domain pair PF13202:EF hand PF12763:Cytoskeletal-regulatory complex EF hand PF13405:EF-hand domain PF13499:EF-hand domain pair PF00036:EF hand PF10591:Secreted protein acidic and rich in cysteine Ca binding region}
transcript_HQ_BAB_transcript15375/f4p0/1967	2.4504e-49	3.4082e-48	{KNA18163.1; hypothetical protein SOVF_073430 [Spinacia oleracea]}	{sp|Q3HRP0|CNBL7_ORYSJ; Calcineurin B-like protein 7 OS=Oryza sativa subsp. japonica GN=CBL7 PE=2 SV=1}	{bvg:104883533; K06268 PPP3R, CNB serine/threonine-protein phosphatase 2B regulatory subunit - ko04010; Environmental Information Processing; Signal transduction; MAPK signaling pathway | ko04310; Environmental Information Processing; Signal transduction; Wnt signaling pathway | ko04370; Environmental Information Processing; Signal transduction; VEGF signaling pathway | ko04020; Environmental Inf…	{At5g24270; KOG0034 Ca2+/calmodulin-dependent protein phosphatase (calcineurin subunit B), EF-Hand superfamily protein T Signal transduction mechanisms ;}	{GO:0005509; calcium ion binding; molecular_function GO:0007165; signal transduction; biological_process GO:0005515; protein binding; molecular_function GO:0005578; proteinaceous extracellular matrix; cellular_component}	{XM_010668144.2; PREDICTED: Beta vulgaris subsp. vulgaris calcineurin B-like protein 4 (LOC104883533), transcript variant X2, mRNA}	{PF12763:Cytoskeletal-regulatory complex EF hand PF13405:EF-hand domain PF13833:EF-hand domain pair PF13202:EF hand PF10591:Secreted protein acidic and rich in cysteine Ca binding region PF00036:EF hand PF13499:EF-hand domain pair}
transcript_HQ_SAB_transcript984/f8p0/3995	2.1094e-182	1.1486e-180	{KNA10150.1; hypothetical protein SOVF_147120 [Spinacia oleracea]}	{sp|O81108|ACA2_ARATH; calcium-transporting ATPase 2, plasma membrane-type OS=Arabidopsis thaliana GN=ACA2 PE=1 SV=1}	{crb:CARUB_v10004056mg; K01537 E3.6.3.8 Ca2+-transporting ATPase 3.6.3.8 -}	{At4g37640; KOG0204 Calcium transporting ATPase P Inorganic ion transport and metabolism ;}	{GO:0000166; nucleotide binding; molecular_function GO:0046872; metal ion binding; molecular_function GO:0005516; calmodulin binding; molecular_function}	{XM_010681329.2; PREDICTED: Beta vulgaris subsp. vulgaris calcium-transporting ATPase 2, plasma membrane-type (LOC104894949), mRNA}	{PF00122:E1-E2 ATPase PF12515:Ca2+-ATPase N terminal autoinhibitory domain}
transcript_HQ_SAB_transcript8330/f2p0/2459	4.6354e-57	7.3526e-56	{KNA07043.1; hypothetical protein SOVF_175530 isoform B [Spinacia oleracea]}	{sp|Q8GV43|PLCD6_ARATH; Phosphoinositide phospholipase C 6 OS=Arabidopsis thaliana GN=PLC6 PE=2 SV=2}	{bvg:104903337; K05857 PLCD phosphatidylinositol phospholipase C, delta 3.1.4.11 ko00562; Metabolism; Carbohydrate metabolism; Inositol phosphate metabolism | ko04020; Environmental Information Processing; Signal transduction; Calcium signaling pathway | ko04070; Environmental Information Processing; Signal transduction; Phosphatidylinositol signaling system | ko04919; Organismal Systems; Endocri…	{At5g58690; KOG0169 Phosphoinositide-specific phospholipase C T Signal transduction mechanisms ;}	{NA}	{XM_004951669.3; PREDICTED: Setaria italica calcium-transporting ATPase 8, plasma membrane-type-like (LOC101773685), transcript variant X1, mRNA}	{NA}
transcript_HQ_SAB_transcript5804/f2p0/2781	6.6066e-05	0.00017575	{KMT13577.1; hypothetical protein BVRB_4g081790 [Beta vulgaris subsp. vulgaris]}	{sp|Q9LIK7|ACA13_ARATH; Putative calcium-transporting ATPase 13, plasma membrane-type OS=Arabidopsis thaliana GN=ACA13 PE=3 SV=1}	{bvg:104890906; K01537 E3.6.3.8 Ca2+-transporting ATPase 3.6.3.8 -}	{At3g22910; KOG0204 Calcium transporting ATPase P Inorganic ion transport and metabolism ;}	{GO:0046872; metal ion binding; molecular_function GO:0000166; nucleotide binding; molecular_function GO:0016020; membrane; cellular_component}	{XM_010676523.2; PREDICTED: Beta vulgaris subsp. vulgaris putative calcium-transporting ATPase 13, plasma membrane-type (LOC104890906), mRNA}	{PF04893:Yip1 domain PF00122:E1-E2 ATPase}
transcript_HQ_SAB_transcript3342/f2p0/3182	1.8409e-05	5.2152e-05	{KNA10150.1; hypothetical protein SOVF_147120 [Spinacia oleracea]}	{sp|O81108|ACA2_ARATH; calcium-transporting ATPase 2, plasma membrane-type OS=Arabidopsis thaliana GN=ACA2 PE=1 SV=1}	{crb:CARUB_v10004056mg; K01537 E3.6.3.8 Ca2+-transporting ATPase 3.6.3.8 -}	{At4g37640; KOG0204 Calcium transporting ATPase P Inorganic ion transport and metabolism ;}	{GO:0000166; nucleotide binding; molecular_function GO:0046872; metal ion binding; molecular_function}	{XM_010681329.2; PREDICTED: Beta vulgaris subsp. vulgaris calcium-transporting ATPase 2, plasma membrane-type (LOC104894949), mRNA}	{PF00122:E1-E2 ATPase}
transcript_HQ_SAB_transcript1635/f3p0/3705	7.5461e-14	3.8197e-13	{XP_010685850.1; PREDICTED: calcium-transporting ATPase 4, endoplasmic reticulum-type [Beta vulgaris subsp. vulgaris]}	{sp|Q9XES1|ECA4_ARATH; calcium-transporting ATPase 4, endoplasmic reticulum-type OS=Arabidopsis thaliana GN=ECA4 PE=2 SV=2}	{jcu:105628186; K01537 E3.6.3.8 Ca2+-transporting ATPase 3.6.3.8 -}	{At1g07670; KOG0202 Ca2+ transporting ATPase P Inorganic ion transport and metabolism ;}	{GO:0046872; metal ion binding; molecular_function GO:0000166; nucleotide binding; molecular_function}	{XM_010687548.2; PREDICTED: Beta vulgaris subsp. vulgaris calcium-transporting ATPase 4, endoplasmic reticulum-type (LOC104900183), mRNA}	{PF00122:E1-E2 ATPase}
transcript_HQ_SAB_transcript1535/f3p0/3747	4.5364e-14	2.3201e-13	{KNA25607.1; hypothetical protein SOVF_005080 [Spinacia oleracea]}	{sp|Q9M2L4|ACA11_ARATH; Putative calcium-transporting ATPase 11, plasma membrane-type OS=Arabidopsis thaliana GN=ACA11 PE=1 SV=1}	{bvg:104889388; K01537 E3.6.3.8 Ca2+-transporting ATPase 3.6.3.8 -}	{At3g57330; KOG0204 Calcium transporting ATPase P Inorganic ion transport and metabolism ;}	{GO:0046872; metal ion binding; molecular_function GO:0005516; calmodulin binding; molecular_function GO:0000166; nucleotide binding; molecular_function}	{XM_010674591.2; PREDICTED: Beta vulgaris subsp. vulgaris putative calcium-transporting ATPase 11, plasma membrane-type (LOC104889388), mRNA}	{PF12515:Ca2+-ATPase N terminal autoinhibitory domain PF00122:E1-E2 ATPase}
transcript_HQ_SAB_transcript1334/f2p0/3857	0.0060794	0.012379	{XP_010687432.1; PREDICTED: calcium-transporting ATPase 10, plasma membrane-type isoform X1 [Beta vulgaris subsp. vulgaris]}	{sp|Q9LF79|ACA8_ARATH; calcium-transporting ATPase 8, plasma membrane-type OS=Arabidopsis thaliana GN=ACA8 PE=1 SV=1}	{vvi:100251227; K01537 E3.6.3.8 Ca2+-transporting ATPase 3.6.3.8 -}	{At5g57110; KOG0204 Calcium transporting ATPase P Inorganic ion transport and metabolism ;}	{GO:0000166; nucleotide binding; molecular_function GO:0046872; metal ion binding; molecular_function GO:0005516; calmodulin binding; molecular_function}	{XM_010689132.2; PREDICTED: Beta vulgaris subsp. vulgaris calcium-transporting ATPase 10, plasma membrane-type (LOC104901544), transcript variant X2, mRNA}	{PF00122:E1-E2 ATPase PF12515:Ca2+-ATPase N terminal autoinhibitory domain}
transcript_HQ_SAB_transcript1327/f2p0/3853	7.0274e-30	6.2834e-29	{KNA25607.1; hypothetical protein SOVF_005080 [Spinacia oleracea]}	{sp|Q9M2L4|ACA11_ARATH; Putative calcium-transporting ATPase 11, plasma membrane-type OS=Arabidopsis thaliana GN=ACA11 PE=1 SV=1}	{bvg:104889388; K01537 E3.6.3.8 Ca2+-transporting ATPase 3.6.3.8 -}	{At3g57330; KOG0204 Calcium transporting ATPase P Inorganic ion transport and metabolism ;}	{GO:0000166; nucleotide binding; molecular_function GO:0046872; metal ion binding; molecular_function GO:0005516; calmodulin binding; molecular_function}	{XM_010674591.2; PREDICTED: Beta vulgaris subsp. vulgaris putative calcium-transporting ATPase 11, plasma membrane-type (LOC104889388), mRNA}	{PF12515:Ca2+-ATPase N terminal autoinhibitory domain PF00122:E1-E2 ATPase}
transcript_HQ_SAB_transcript1120/f2p0/3962	1.0373e-30	9.4592e-30	{XP_010688117.1; PREDICTED: calcium-transporting ATPase 1, chloroplastic [Beta vulgaris subsp. vulgaris]}	{sp|Q37145|ACA1_ARATH; calcium-transporting ATPase 1, chloroplastic OS=Arabidopsis thaliana GN=ACA1 PE=1 SV=3}	{bvg:104902123; K01537 E3.6.3.8 Ca2+-transporting ATPase 3.6.3.8 -}	{At1g27770; KOG0204 Calcium transporting ATPase P Inorganic ion transport and metabolism ;}	{GO:0046872; metal ion binding; molecular_function GO:0005516; calmodulin binding; molecular_function GO:0000166; nucleotide binding; molecular_function}	{XM_010689815.2; PREDICTED: Beta vulgaris subsp. vulgaris calcium-transporting ATPase 1, chloroplastic (LOC104902123), mRNA}	{PF12515:Ca2+-ATPase N terminal autoinhibitory domain PF00122:E1-E2 ATPase}
transcript_HQ_SAB_transcript10973/f2p0/2241	1.2286e-08	4.5506e-08	{XP_010679630.1; PREDICTED: uncharacterized protein LOC104894948 [Beta vulgaris subsp. vulgaris]}	{sp|O64806|ACA7_ARATH; Putative calcium-transporting ATPase 7, plasma membrane-type OS=Arabidopsis thaliana GN=ACA7 PE=3 SV=2}	{rcu:8283360; K11492 NCAPG2, LUZP5 condensin-2 complex subunit G2 - -}	{At1g64960; KOG1949 Uncharacterized conserved protein S Function unknown ;}	{NA}	{XM_010681328.2; PREDICTED: Beta vulgaris subsp. vulgaris hypothetical protein (LOC104894948), mRNA}	{NA}
transcript_HQ_SAB_transcript1014/f2p0/4016	8.0773e-15	4.2814e-14	{XP_010679631.1; PREDICTED: calcium-transporting ATPase 2, plasma membrane-type [Beta vulgaris subsp. vulgaris]}	{sp|O81108|ACA2_ARATH; calcium-transporting ATPase 2, plasma membrane-type OS=Arabidopsis thaliana GN=ACA2 PE=1 SV=1}	{crb:CARUB_v10004056mg; K01537 E3.6.3.8 Ca2+-transporting ATPase 3.6.3.8 -}	{At4g37640; KOG0204 Calcium transporting ATPase P Inorganic ion transport and metabolism ;}	{GO:0000166; nucleotide binding; molecular_function GO:0005516; calmodulin binding; molecular_function GO:0046872; metal ion binding; molecular_function}	{XM_010681329.2; PREDICTED: Beta vulgaris subsp. vulgaris calcium-transporting ATPase 2, plasma membrane-type (LOC104894949), mRNA}	{PF12515:Ca2+-ATPase N terminal autoinhibitory domain PF00122:E1-E2 ATPase}
transcript_HQ_BAB_transcript4537/f2p0/3350	6.9855e-46	9.0379e-45	{XP_010696566.1; PREDICTED: putative calcium-transporting ATPase 13, plasma membrane-type [Beta vulgaris subsp. vulgaris]}	{sp|Q9LIK7|ACA13_ARATH; Putative calcium-transporting ATPase 13, plasma membrane-type OS=Arabidopsis thaliana GN=ACA13 PE=3 SV=1}	{pxb:103950017; K01537 E3.6.3.8 Ca2+-transporting ATPase 3.6.3.8 -}	{At3g22910; KOG0204 Calcium transporting ATPase P Inorganic ion transport and metabolism ;}	{GO:0000166; nucleotide binding; molecular_function GO:0046872; metal ion binding; molecular_function}	{XM_010697455.2; PREDICTED: Beta vulgaris subsp. vulgaris putative calcium-transporting ATPase 13, plasma membrane-type (LOC104908348), mRNA}	{PF00122:E1-E2 ATPase}
transcript_HQ_BAB_transcript4129/f2p0/3444	0.0036694	0.0077349	{XP_010688117.1; PREDICTED: calcium-transporting ATPase 1, chloroplastic [Beta vulgaris subsp. vulgaris]}	{sp|Q37145|ACA1_ARATH; calcium-transporting ATPase 1, chloroplastic OS=Arabidopsis thaliana GN=ACA1 PE=1 SV=3}	{bvg:104902123; K01537 E3.6.3.8 Ca2+-transporting ATPase 3.6.3.8 -}	{At1g27770; KOG0204 Calcium transporting ATPase P Inorganic ion transport and metabolism ;}	{GO:0046872; metal ion binding; molecular_function GO:0000166; nucleotide binding; molecular_function GO:0005516; calmodulin binding; molecular_function}	{XM_010689815.2; PREDICTED: Beta vulgaris subsp. vulgaris calcium-transporting ATPase 1, chloroplastic (LOC104902123), mRNA}	{PF00122:E1-E2 ATPase PF12515:Ca2+-ATPase N terminal autoinhibitory domain}
transcript_HQ_BAB_transcript3630/f2p0/3582	2.0186e-20	1.3467e-19	{KNA10150.1; hypothetical protein SOVF_147120 [Spinacia oleracea]}	{sp|O81108|ACA2_ARATH; calcium-transporting ATPase 2, plasma membrane-type OS=Arabidopsis thaliana GN=ACA2 PE=1 SV=1}	{rcu:8283362; K01537 E3.6.3.8 Ca2+-transporting ATPase 3.6.3.8 -}	{At4g37640; KOG0204 Calcium transporting ATPase P Inorganic ion transport and metabolism ;}	{NA}	{XM_010681329.2; PREDICTED: Beta vulgaris subsp. vulgaris calcium-transporting ATPase 2, plasma membrane-type (LOC104894949), mRNA}	{NA}
transcript_HQ_BAB_transcript309/f2p0/5095	0	0	{KNA10150.1; hypothetical protein SOVF_147120 [Spinacia oleracea]}	{sp|O81108|ACA2_ARATH; calcium-transporting ATPase 2, plasma membrane-type OS=Arabidopsis thaliana GN=ACA2 PE=1 SV=1}	{crb:CARUB_v10004056mg; K01537 E3.6.3.8 Ca2+-transporting ATPase 3.6.3.8 -}	{At4g37640; KOG0204 Calcium transporting ATPase P Inorganic ion transport and metabolism ;}	{GO:0046872; metal ion binding; molecular_function GO:0000166; nucleotide binding; molecular_function GO:0005516; calmodulin binding; molecular_function}	{XM_010681329.2; PREDICTED: Beta vulgaris subsp. vulgaris calcium-transporting ATPase 2, plasma membrane-type (LOC104894949), mRNA}	{PF12515:Ca2+-ATPase N terminal autoinhibitory domain PF00122:E1-E2 ATPase}
transcript_HQ_BAB_transcript308/f2p0/5123	0	0	{XP_010679631.1; PREDICTED: calcium-transporting ATPase 2, plasma membrane-type [Beta vulgaris subsp. vulgaris]}	{sp|O81108|ACA2_ARATH; calcium-transporting ATPase 2, plasma membrane-type OS=Arabidopsis thaliana GN=ACA2 PE=1 SV=1}	{pmum:103336701; K01537 E3.6.3.8 Ca2+-transporting ATPase 3.6.3.8 -}	{At4g37640; KOG0204 Calcium transporting ATPase P Inorganic ion transport and metabolism ;}	{GO:0000166; nucleotide binding; molecular_function GO:0046872; metal ion binding; molecular_function}	{XM_010681329.2; PREDICTED: Beta vulgaris subsp. vulgaris calcium-transporting ATPase 2, plasma membrane-type (LOC104894949), mRNA}	{PF00122:E1-E2 ATPase}
transcript_HQ_BAB_transcript2919/f2p0/3674	2.7639e-34	2.7834e-33	{XP_010679631.1; PREDICTED: calcium-transporting ATPase 2, plasma membrane-type [Beta vulgaris subsp. vulgaris]}	{sp|O81108|ACA2_ARATH; calcium-transporting ATPase 2, plasma membrane-type OS=Arabidopsis thaliana GN=ACA2 PE=1 SV=1}	{rcu:8283362; K01537 E3.6.3.8 Ca2+-transporting ATPase 3.6.3.8 -}	{At4g37640; KOG0204 Calcium transporting ATPase P Inorganic ion transport and metabolism ;}	{GO:0016301; kinase activity; molecular_function}	{XM_010681329.2; PREDICTED: Beta vulgaris subsp. vulgaris calcium-transporting ATPase 2, plasma membrane-type (LOC104894949), mRNA}	{PF00781:Diacylglycerol kinase catalytic domain}
transcript_HQ_BAB_transcript2826/f10p0/3697	1.0954e-200	6.8072e-199	{KNA25607.1; hypothetical protein SOVF_005080 [Spinacia oleracea]}	{sp|Q9M2L4|ACA11_ARATH; Putative calcium-transporting ATPase 11, plasma membrane-type OS=Arabidopsis thaliana GN=ACA11 PE=1 SV=1}	{bvg:104889388; K01537 E3.6.3.8 Ca2+-transporting ATPase 3.6.3.8 -}	{At3g57330; KOG0204 Calcium transporting ATPase P Inorganic ion transport and metabolism ;}	{GO:0005516; calmodulin binding; molecular_function GO:0046872; metal ion binding; molecular_function GO:0000166; nucleotide binding; molecular_function}	{XM_010674591.2; PREDICTED: Beta vulgaris subsp. vulgaris putative calcium-transporting ATPase 11, plasma membrane-type (LOC104889388), mRNA}	{PF12515:Ca2+-ATPase N terminal autoinhibitory domain PF00122:E1-E2 ATPase}
transcript_HQ_BAB_transcript2406/f3p0/3895	6.4179e-93	1.695e-91	{KNA25607.1; hypothetical protein SOVF_005080 [Spinacia oleracea]}	{sp|Q9M2L4|ACA11_ARATH; Putative calcium-transporting ATPase 11, plasma membrane-type OS=Arabidopsis thaliana GN=ACA11 PE=1 SV=1}	{bvg:104889388; K01537 E3.6.3.8 Ca2+-transporting ATPase 3.6.3.8 -}	{At3g57330; KOG0204 Calcium transporting ATPase P Inorganic ion transport and metabolism ;}	{GO:0000166; nucleotide binding; molecular_function GO:0046872; metal ion binding; molecular_function GO:0005516; calmodulin binding; molecular_function}	{XM_010674591.2; PREDICTED: Beta vulgaris subsp. vulgaris putative calcium-transporting ATPase 11, plasma membrane-type (LOC104889388), mRNA}	{PF12515:Ca2+-ATPase N terminal autoinhibitory domain PF00122:E1-E2 ATPase}
transcript_HQ_BAB_transcript2371/f2p0/3874	3.0426e-60	5.0657e-59	{XP_010687432.1; PREDICTED: calcium-transporting ATPase 10, plasma membrane-type isoform X1 [Beta vulgaris subsp. vulgaris]}	{sp|Q9LF79|ACA8_ARATH; calcium-transporting ATPase 8, plasma membrane-type OS=Arabidopsis thaliana GN=ACA8 PE=1 SV=1}	{vvi:100251227; K01537 E3.6.3.8 Ca2+-transporting ATPase 3.6.3.8 -}	{At5g57110; KOG0204 Calcium transporting ATPase P Inorganic ion transport and metabolism ;}	{GO:0046872; metal ion binding; molecular_function GO:0000166; nucleotide binding; molecular_function GO:0005516; calmodulin binding; molecular_function}	{XM_010689132.2; PREDICTED: Beta vulgaris subsp. vulgaris calcium-transporting ATPase 10, plasma membrane-type (LOC104901544), transcript variant X2, mRNA}	{PF00122:E1-E2 ATPase PF12515:Ca2+-ATPase N terminal autoinhibitory domain}
transcript_HQ_BAB_transcript1803/f2p0/4005	0.00025084	0.00062182	{XP_010687432.1; PREDICTED: calcium-transporting ATPase 10, plasma membrane-type isoform X1 [Beta vulgaris subsp. vulgaris]}	{sp|Q9LF79|ACA8_ARATH; calcium-transporting ATPase 8, plasma membrane-type OS=Arabidopsis thaliana GN=ACA8 PE=1 SV=1}	{vvi:100251227; K01537 E3.6.3.8 Ca2+-transporting ATPase 3.6.3.8 -}	{At5g57110; KOG0204 Calcium transporting ATPase P Inorganic ion transport and metabolism ;}	{GO:0000166; nucleotide binding; molecular_function GO:0046872; metal ion binding; molecular_function GO:0005516; calmodulin binding; molecular_function}	{XM_010689132.2; PREDICTED: Beta vulgaris subsp. vulgaris calcium-transporting ATPase 10, plasma membrane-type (LOC104901544), transcript variant X2, mRNA}	{PF00122:E1-E2 ATPase PF12515:Ca2+-ATPase N terminal autoinhibitory domain}
transcript_HQ_BAB_transcript169/f2p0/5508	7.6519e-68	1.4461e-66	{KNA10150.1; hypothetical protein SOVF_147120 [Spinacia oleracea]}	{sp|O81108|ACA2_ARATH; calcium-transporting ATPase 2, plasma membrane-type OS=Arabidopsis thaliana GN=ACA2 PE=1 SV=1}	{crb:CARUB_v10004056mg; K01537 E3.6.3.8 Ca2+-transporting ATPase 3.6.3.8 -}	{At4g37640; KOG0204 Calcium transporting ATPase P Inorganic ion transport and metabolism ;}	{GO:0005516; calmodulin binding; molecular_function GO:0000166; nucleotide binding; molecular_function GO:0046872; metal ion binding; molecular_function}	{XM_010681329.2; PREDICTED: Beta vulgaris subsp. vulgaris calcium-transporting ATPase 2, plasma membrane-type (LOC104894949), mRNA}	{PF12515:Ca2+-ATPase N terminal autoinhibitory domain PF00122:E1-E2 ATPase}
transcript_HQ_BAB_transcript1648/f9p0/4037	1.8792e-84	4.4864e-83	{XP_010687432.1; PREDICTED: calcium-transporting ATPase 10, plasma membrane-type isoform X1 [Beta vulgaris subsp. vulgaris]}	{sp|Q9LF79|ACA8_ARATH; calcium-transporting ATPase 8, plasma membrane-type OS=Arabidopsis thaliana GN=ACA8 PE=1 SV=1}	{vvi:100251227; K01537 E3.6.3.8 Ca2+-transporting ATPase 3.6.3.8 -}	{At5g57110; KOG0204 Calcium transporting ATPase P Inorganic ion transport and metabolism ;}	{GO:0046872; metal ion binding; molecular_function GO:0000166; nucleotide binding; molecular_function GO:0005516; calmodulin binding; molecular_function}	{XM_010689132.2; PREDICTED: Beta vulgaris subsp. vulgaris calcium-transporting ATPase 10, plasma membrane-type (LOC104901544), transcript variant X2, mRNA}	{PF12515:Ca2+-ATPase N terminal autoinhibitory domain PF00122:E1-E2 ATPase}
transcript_HQ_BAB_transcript1628/f7p0/4072	1.021e-262	8.9885e-261	{KNA10150.1; hypothetical protein SOVF_147120 [Spinacia oleracea]}	{sp|O81108|ACA2_ARATH; calcium-transporting ATPase 2, plasma membrane-type OS=Arabidopsis thaliana GN=ACA2 PE=1 SV=1}	{crb:CARUB_v10004056mg; K01537 E3.6.3.8 Ca2+-transporting ATPase 3.6.3.8 -}	{At4g37640; KOG0204 Calcium transporting ATPase P Inorganic ion transport and metabolism ;}	{GO:0000166; nucleotide binding; molecular_function GO:0046872; metal ion binding; molecular_function GO:0005516; calmodulin binding; molecular_function}	{XM_010681329.2; PREDICTED: Beta vulgaris subsp. vulgaris calcium-transporting ATPase 2, plasma membrane-type (LOC104894949), mRNA}	{PF00122:E1-E2 ATPase PF12515:Ca2+-ATPase N terminal autoinhibitory domain}
transcript_HQ_BAB_transcript153/f2p0/5538	0	0	{XP_010679631.1; PREDICTED: calcium-transporting ATPase 2, plasma membrane-type [Beta vulgaris subsp. vulgaris]}	{sp|O81108|ACA2_ARATH; calcium-transporting ATPase 2, plasma membrane-type OS=Arabidopsis thaliana GN=ACA2 PE=1 SV=1}	{crb:CARUB_v10004056mg; K01537 E3.6.3.8 Ca2+-transporting ATPase 3.6.3.8 -}	{At4g37640; KOG0204 Calcium transporting ATPase P Inorganic ion transport and metabolism ;}	{GO:0005516; calmodulin binding; molecular_function GO:0000166; nucleotide binding; molecular_function GO:0046872; metal ion binding; molecular_function}	{XM_010681329.2; PREDICTED: Beta vulgaris subsp. vulgaris calcium-transporting ATPase 2, plasma membrane-type (LOC104894949), mRNA}	{PF12515:Ca2+-ATPase N terminal autoinhibitory domain PF00122:E1-E2 ATPase}
transcript_HQ_BAB_transcript12547/f3p0/2263	6.3987e-07	2.085e-06	{XP_010693884.1; PREDICTED: calcium-transporting ATPase, endoplasmic reticulum-type [Beta vulgaris subsp. vulgaris]}	{sp|Q42883|ECAP_SOLLC; calcium-transporting ATPase, endoplasmic reticulum-type OS=Solanum lycopersicum GN=LCA1 PE=2 SV=1}	{bvg:104906756; K01537 E3.6.3.8 Ca2+-transporting ATPase 3.6.3.8 -}	{At4g00900; KOG0202 Ca2+ transporting ATPase P Inorganic ion transport and metabolism ;}	{NA}	{XM_010695582.2; PREDICTED: Beta vulgaris subsp. vulgaris calcium-transporting ATPase, endoplasmic reticulum-type (LOC104906756), mRNA}	{NA}
transcript_HQ_SAB_transcript9849/f7p0/2295	0.00081394	0.0018902	{XP_010696533.1; PREDICTED: IQ domain-containing protein IQM1 [Beta vulgaris subsp. vulgaris]}	{sp|O64851|IQM4_ARATH; IQ domain-containing protein IQM4 OS=Arabidopsis thaliana GN=IQM4 PE=2 SV=1}	{pper:PRUPE_ppa003777mg; - - - - -}	{NA}	{GO:0005515; protein binding; molecular_function}	{XM_010698231.2; PREDICTED: Beta vulgaris subsp. vulgaris hypothetical protein (LOC104909048), mRNA}	{PF00612:IQ Calmodulin-binding motif}
transcript_HQ_SAB_transcript9817/f3p0/2316	2.8968e-14	1.4953e-13	{XP_010672433.1; PREDICTED: protein IQ-DOMAIN 14 [Beta vulgaris subsp. vulgaris]}	{sp|Q8LPG9|IQD14_ARATH; Protein IQ-DOMAIN 14 OS=Arabidopsis thaliana GN=IQD14 PE=1 SV=1}	{bvg:104889007; - - - - -}	{NA}	{GO:0006357; regulation of transcription from RNA polymerase II promoter; biological_process GO:0016592; mediator complex; cellular_component GO:0001104; RNA polymerase II transcription cofactor activity; molecular_function GO:0005515; protein binding; molecular_function}	{XM_010674131.2; PREDICTED: Beta vulgaris subsp. vulgaris protein IQ-DOMAIN 14 (LOC104889007), transcript variant X1, mRNA}	{PF00612:IQ Calmodulin-binding motif PF08633:Rox3 mediator complex subunit}
transcript_HQ_SAB_transcript9557/f4p0/2337	0.014955	0.028289	{XP_010678432.1; PREDICTED: uncharacterized protein LOC104893983 [Beta vulgaris subsp. vulgaris]}	{NA}	{bvg:104893983; - - - - -}	{NA}	{GO:0005516; Calmodulin binding; molecular_function}	{XM_010680130.2; PREDICTED: Beta vulgaris subsp. vulgaris hypothetical protein (LOC104893983), mRNA}	{PF07839:Plant Calmodulin-binding domain}
transcript_HQ_SAB_transcript9109/f2p0/2387	3.1385e-10	1.2967e-09	{XP_010690237.1; PREDICTED: protein IQ-DOMAIN 1 [Beta vulgaris subsp. vulgaris]}	{sp|Q9SF32|IQD1_ARATH; Protein IQ-DOMAIN 1 OS=Arabidopsis thaliana GN=IQD1 PE=1 SV=1}	{bvg:104903788; - - - - -}	{NA}	{GO:0005515; protein binding; molecular_function}	{XM_010691935.2; PREDICTED: Beta vulgaris subsp. vulgaris protein IQ-DOMAIN 1 (LOC104903788), mRNA}	{PF00612:IQ Calmodulin-binding motif}
transcript_HQ_SAB_transcript706/f2p0/4239	0.0014496	0.0032547	{XP_010669615.1; PREDICTED: BAG family molecular chaperone regulator 6 [Beta vulgaris subsp. vulgaris]}	{sp|O82345|BAG6_ARATH; BAG family molecular chaperone regulator 6 OS=Arabidopsis thaliana GN=BAG6 PE=1 SV=1}	{bvg:104886797; - - - - -}	{NA}	{GO:0005515; protein binding; molecular_function GO:0051087; chaperone binding; molecular_function}	{NA}	{PF00612:IQ Calmodulin-binding motif PF02179:BAG domain}
transcript_HQ_SAB_transcript5203/f4p0/2867	2.4392e-10	1.0129e-09	{XP_010677822.1; PREDICTED: probable cyclic nucleotide-gated ion channel 5 isoform X1 [Beta vulgaris subsp. vulgaris]}	{sp|Q8RWS9|CNGC5_ARATH; Probable cyclic nucleotide-gated ion channel 5 OS=Arabidopsis thaliana GN=CNGC5 PE=2 SV=1}	{bvg:104893415; K05391 CNGF cyclic nucleotide gated channel, other eukaryote - ko04626; Organismal Systems; Environmental adaptation; Plant-pathogen interaction}	{At5g57940; KOG0498 K+-channel ERG and related proteins, contain PAS/PAC sensor domain PT Inorganic ion transport and metabolism ; Signal transduction mechanisms ;}	{GO:0005216; ion channel activity; molecular_function GO:0016020; membrane; cellular_component GO:0006811; ion transport; biological_process GO:0055085; transmembrane transport; biological_process GO:0005515; protein binding; molecular_function}	{XM_010679522.2; PREDICTED: Beta vulgaris subsp. vulgaris probable cyclic nucleotide-gated ion channel 5 (LOC104893415), transcript variant X3, mRNA}	{PF00520:Ion transport protein PF00612:IQ Calmodulin-binding motif}
transcript_HQ_SAB_transcript4551/f2p0/2963	1.4106e-92	3.7022e-91	{ONL97467.1; Calmodulin-7 [Zea mays]}	{sp|Q0JNS6|CALM1_ORYSJ; Calmodulin-1 OS=Oryza sativa subsp. japonica GN=CAM1-1 PE=1 SV=2}	{cit:102620326; K02183 CALM Calmodulin - ko04014; Environmental Information Processing; Signal transduction; Ras signaling pathway | ko04015; Environmental Information Processing; Signal transduction; Rap1 signaling pathway | ko04016; Environmental Information Processing; Signal transduction; MAPK signaling pathway - plant | ko04371; Environmental Information Processing; Signal transduction; Apel…	{At3g43810; KOG0027 Calmodulin and related proteins (EF-Hand superfamily) T Signal transduction mechanisms ;}	{GO:0015159; polysaccharide transmembrane transporter activity; molecular_function GO:0006351; transcription, DNA-dependent; biological_process GO:0015774; polysaccharide transport; biological_process GO:0016020; membrane; cellular_component GO:0005578; proteinaceous extracellular matrix; cellular_component GO:0005509; calcium ion binding; molecular_function GO:0003899; DNA-directed RNA polymeras…	{XM_010674913.2; PREDICTED: Beta vulgaris subsp. vulgaris Calmodulin (LOC104889645), mRNA}	{PF13405:EF-hand domain PF13499:EF-hand domain pair PF00036:EF hand PF13833:EF-hand domain pair PF12763:Cytoskeletal-regulatory complex EF hand PF10591:Secreted protein acidic and rich in cysteine Ca binding region PF03874:RNA polymerase Rpb4 PF02563:Polysaccharide biosynthesis/export protein PF13202:EF hand}
transcript_HQ_SAB_transcript379/f2p0/4742	3.9647e-26	3.1838e-25	{KMT10337.1; hypothetical protein BVRB_5g120870 [Beta vulgaris subsp. vulgaris]}	{NA}	{bvg:104894639; - - - - -}	{At2g42450; KOG2088 Predicted lipase/Calmodulin-binding heat-shock protein IOT Lipid transport and metabolism ; Posttranslational modification, protein turnover, chaperones ; Signal transduction mechanisms ;}	{NA}	{XM_006479497.2; PREDICTED: Citrus sinensis uncharacterized LOC102621395 (LOC102621395), mRNA}	{NA}
transcript_HQ_SAB_transcript3620/f5p0/3117	2.8815e-09	1.1159e-08	{JAT46282.1; Myosin heavy chain, muscle [Anthurium amnicola]}	{sp|P05661|MYSA_DROME; Myosin heavy chain, muscle OS=Drosophila melanogaster GN=Mhc PE=1 SV=4}	{brp:103849539; - - - - -}	{Hs4557773; KOG0161 Myosin class II heavy chain Z Cytoskeleton ;}	{GO:0048193; Golgi vesicle transport; biological_process GO:0005515; protein binding; molecular_function GO:0005506; iron ion binding; molecular_function GO:0016020; membrane; cellular_component GO:0005524; ATP binding; molecular_function GO:0009055; NA GO:0020037; heme binding; molecular_function GO:0007155; cell adhesion; biological_process GO:0016459; myosin complex; cellular_component GO:0003…	{NA}	{PF09177:Syntaxin 6, N-terminal PF06009:Laminin Domain II PF00063:Myosin head (motor domain) PF01576:Myosin tail PF01322:Cytochrome C' PF02736:Myosin N-terminal SH3-like domain PF00612:IQ Calmodulin-binding motif}
transcript_HQ_SAB_transcript3354/f2p0/3203	3.8785e-17	2.2832e-16	{KNA11895.1; hypothetical protein SOVF_130920 [Spinacia oleracea]}	{sp|Q9FXI5|IQD32_ARATH; Protein IQ-DOMAIN 32 OS=Arabidopsis thaliana GN=IQD32 PE=1 SV=3}	{gra:105784632; - - - - -}	{NA}	{GO:0005515; protein binding; molecular_function}	{XM_010694398.2; PREDICTED: Beta vulgaris subsp. vulgaris protein IQ-DOMAIN 32 (LOC104905768), mRNA}	{PF00612:IQ Calmodulin-binding motif}
transcript_HQ_SAB_transcript28180/f2p0/1047	2.8523e-10	1.1809e-09	{XP_010675421.1; PREDICTED: Serine/threonine-protein kinase PEPKR2 [Beta vulgaris subsp. vulgaris]}	{sp|Q8W490|PEPK2_ARATH; Serine/threonine-protein kinase PEPKR2 OS=Arabidopsis thaliana GN=PEPKR2 PE=2 SV=1}	{bvg:104891422; - - - - -}	{At1g12680; KOG0032 Ca2+/Calmodulin-dependent protein kinase, EF-Hand protein superfamily T Signal transduction mechanisms ;}	{GO:0016020; membrane; cellular_component GO:0006468; protein phosphorylation; biological_process GO:0004672; protein kinase activity; molecular_function GO:0016773; phosphotransferase activity, alcohol group as acceptor; molecular_function GO:0005524; ATP binding; molecular_function}	{XM_010677123.2; PREDICTED: Beta vulgaris subsp. vulgaris Serine/threonine-protein kinase PEPKR2 (LOC104891422), transcript variant X2, mRNA}	{PF06293:Lipopolysaccharide kinase (Kdo/WaaP) family PF00069:Protein kinase domain PF07714:Protein tyrosine kinase}
transcript_HQ_SAB_transcript2514/f6p0/3389	0.021376	0.0392	{KNA11895.1; hypothetical protein SOVF_130920 [Spinacia oleracea]}	{sp|Q9FXI5|IQD32_ARATH; Protein IQ-DOMAIN 32 OS=Arabidopsis thaliana GN=IQD32 PE=1 SV=3}	{gra:105784632; - - - - -}	{NA}	{GO:0005515; protein binding; molecular_function}	{XM_010694398.2; PREDICTED: Beta vulgaris subsp. vulgaris protein IQ-DOMAIN 32 (LOC104905768), mRNA}	{PF00612:IQ Calmodulin-binding motif}
transcript_HQ_SAB_transcript24285/f2p0/1340	0.0024299	0.0052689	{KNA06544.1; hypothetical protein SOVF_180120 [Spinacia oleracea]}	{NA}	{nnu:104598879; - - - - -}	{At4g16070; KOG2088 Predicted lipase/Calmodulin-binding heat-shock protein IOT Lipid transport and metabolism ; Posttranslational modification, protein turnover, chaperones ; Signal transduction mechanisms ;}	{NA}	{XM_010672630.2; PREDICTED: Beta vulgaris subsp. vulgaris hypothetical protein (LOC104887866), mRNA}	{NA}
transcript_HQ_SAB_transcript23476/f2p0/1393	9.8102e-07	3.1486e-06	{XP_010686348.1; PREDICTED: protein IQ-DOMAIN 1 [Beta vulgaris subsp. vulgaris]}	{sp|Q9SF32|IQD1_ARATH; Protein IQ-DOMAIN 1 OS=Arabidopsis thaliana GN=IQD1 PE=1 SV=1}	{vvi:100258909; - - - - -}	{NA}	{GO:0005515; protein binding; molecular_function}	{XM_010688046.2; PREDICTED: Beta vulgaris subsp. vulgaris protein IQ-DOMAIN 1 (LOC104900587), transcript variant X1, mRNA}	{PF00612:IQ Calmodulin-binding motif}
transcript_HQ_SAB_transcript234/f2p0/5004	5.4719e-23	3.9935e-22	{KNA14621.1; hypothetical protein SOVF_105840 [Spinacia oleracea]}	{sp|Q9LHE9|MYO1_ARATH; Myosin-1 OS=Arabidopsis thaliana GN=VIII-1 PE=1 SV=1}	{vvi:100254832; - - - - -}	{At3g19960; KOG0160 Myosin class V heavy chain Z Cytoskeleton ;}	{GO:0003774; motor activity; molecular_function GO:0005515; protein binding; molecular_function GO:0016459; myosin complex; cellular_component GO:0005524; ATP binding; molecular_function}	{XM_010690349.2; PREDICTED: Beta vulgaris subsp. vulgaris myosin-1 (LOC104902546), mRNA}	{PF00063:Myosin head (motor domain) PF00612:IQ Calmodulin-binding motif}
transcript_HQ_SAB_transcript2240/f2p0/3503	0.00034907	0.00084996	{KNA07165.1; hypothetical protein SOVF_174400 isoform A [Spinacia oleracea]}	{sp|O23463|CMTA5_ARATH; Calmodulin-binding transcription activator 5 OS=Arabidopsis thaliana GN=CMTA5 PE=2 SV=2}	{bvg:104888404; K21596 - - - -}	{At4g16150; KOG0520 Uncharacterized conserved protein, contains IPT/TIG domain S Function unknown ;}	{GO:0005634; nucleus; cellular_component GO:0003677; DNA binding; molecular_function GO:0005515; protein binding; molecular_function}	{XM_019248541.1; PREDICTED: Beta vulgaris subsp. vulgaris Calmodulin-binding transcription activator 6 (LOC104888404), transcript variant X3, mRNA}	{PF00023:Ankyrin repeat PF13606:Ankyrin repeat PF03859:CG-1 domain PF00612:IQ Calmodulin-binding motif}
transcript_HQ_SAB_transcript21061/f2p0/1552	2.4641e-06	7.6056e-06	{XP_010670077.1; PREDICTED: Calmodulin-binding receptor-like cytoplasmic kinase 2 [Beta vulgaris subsp. vulgaris]}	{sp|Q8VZJ9|CRCK2_ARATH; Calmodulin-binding receptor-like cytoplasmic kinase 2 OS=Arabidopsis thaliana GN=CRCK2 PE=2 SV=1}	{bvg:104887178; - - - - -}	{At4g00330; KOG1187 Serine/threonine protein kinase T Signal transduction mechanisms ;}	{GO:0005524; ATP binding; molecular_function GO:0004672; protein kinase activity; molecular_function GO:0006468; protein phosphorylation; biological_process}	{XM_010671775.2; PREDICTED: Beta vulgaris subsp. vulgaris Calmodulin-binding receptor-like cytoplasmic kinase 2 (LOC104887178), mRNA}	{PF00069:Protein kinase domain PF07714:Protein tyrosine kinase}
transcript_HQ_SAB_transcript20778/f2p0/1564	0.018425	0.034256	{KNA24230.1; hypothetical protein SOVF_017770 [Spinacia oleracea]}	{sp|O65373|BAG5_ARATH; BAG family molecular chaperone regulator 5, mitochondrial OS=Arabidopsis thaliana GN=BAG5 PE=1 SV=1}	{pmum:103322138; - - - - -}	{NA}	{GO:0051087; chaperone binding; molecular_function GO:0005515; protein binding; molecular_function}	{XM_010684404.2; PREDICTED: Beta vulgaris subsp. vulgaris BAG family molecular chaperone regulator 6 (LOC104897517), mRNA}	{PF00612:IQ Calmodulin-binding motif PF02179:BAG domain}
transcript_HQ_SAB_transcript1952/f2p0/3607	8.38e-64	1.4816e-62	{XP_010682739.1; PREDICTED: Calmodulin-binding transcription activator 4 [Beta vulgaris subsp. vulgaris]}	{sp|Q9FYG2|CMTA4_ARATH; Calmodulin-binding transcription activator 4 OS=Arabidopsis thaliana GN=CMTA4 PE=1 SV=1}	{pmum:103322088; K21596 - - - -}	{At1g67310; KOG0520 Uncharacterized conserved protein, contains IPT/TIG domain S Function unknown ;}	{GO:0005634; nucleus; cellular_component GO:0003677; DNA binding; molecular_function GO:0005515; protein binding; molecular_function}	{XM_010684437.2; PREDICTED: Beta vulgaris subsp. vulgaris Calmodulin-binding transcription activator 4 (LOC104897544), mRNA}	{PF00612:IQ Calmodulin-binding motif PF01833:IPT/TIG domain PF03859:CG-1 domain PF13606:Ankyrin repeat PF00023:Ankyrin repeat}
transcript_HQ_SAB_transcript17051/f2p0/1799	0.0028905	0.0061975	{XP_010675113.1; PREDICTED: protein WVD2-like 1 isoform X1 [Beta vulgaris subsp. vulgaris]}	{sp|Q84ZT9|WVD2_ARATH; Protein WAVE-DAMPENED 2 OS=Arabidopsis thaliana GN=WVD2 PE=2 SV=1}	{bvg:104891152; - - - - -}	{NA}	{GO:0031175; neuron projection development; biological_process GO:0030507; spectrin binding; molecular_function GO:0005516; Calmodulin binding; molecular_function}	{XM_010676811.2; PREDICTED: Beta vulgaris subsp. vulgaris protein WVD2-like 3 (LOC104891152), transcript variant X1, mRNA}	{PF17095:Spectrin-binding region of Ca2+-Calmodulin}
transcript_HQ_SAB_transcript16290/f3p0/1869	5.3048e-23	3.8769e-22	{XP_010680435.1; PREDICTED: CDPK-related kinase 5 [Beta vulgaris subsp. vulgaris]}	{sp|P53681|CRK_DAUCA; CDPK-related protein kinase OS=Daucus carota GN=CRK PE=2 SV=1}	{pper:PRUPE_ppa003111mg; - - - - -}	{At3g50530; KOG0032 Ca2+/Calmodulin-dependent protein kinase, EF-Hand protein superfamily T Signal transduction mechanisms ;}	{GO:0006468; protein phosphorylation; biological_process GO:0016020; membrane; cellular_component GO:0005509; calcium ion binding; molecular_function GO:0004672; protein kinase activity; molecular_function GO:0016773; phosphotransferase activity, alcohol group as acceptor; molecular_function GO:0005524; ATP binding; molecular_function}	{XM_010682133.2; PREDICTED: Beta vulgaris subsp. vulgaris CDPK-related kinase 5 (LOC104895576), mRNA}	{PF07714:Protein tyrosine kinase PF00036:EF hand PF00069:Protein kinase domain PF06293:Lipopolysaccharide kinase (Kdo/WaaP) family}
transcript_HQ_SAB_transcript16165/f2p0/1864	5.1927e-101	1.5174e-99	{XP_010672433.1; PREDICTED: protein IQ-DOMAIN 14 [Beta vulgaris subsp. vulgaris]}	{sp|Q8LPG9|IQD14_ARATH; Protein IQ-DOMAIN 14 OS=Arabidopsis thaliana GN=IQD14 PE=1 SV=1}	{bvg:104889007; - - - - -}	{NA}	{GO:0005515; protein binding; molecular_function GO:0001104; RNA polymerase II transcription cofactor activity; molecular_function GO:0016592; mediator complex; cellular_component GO:0006357; regulation of transcription from RNA polymerase II promoter; biological_process}	{XM_010674132.2; PREDICTED: Beta vulgaris subsp. vulgaris protein IQ-DOMAIN 14 (LOC104889007), transcript variant X2, mRNA}	{PF00612:IQ Calmodulin-binding motif PF08633:Rox3 mediator complex subunit}
transcript_HQ_SAB_transcript15296/f18p0/1845	5.1008e-31	4.6959e-30	{KNA20947.1; hypothetical protein SOVF_047680 [Spinacia oleracea]}	{sp|Q9C9T2|SARD1_ARATH; Protein SAR DEFICIENT 1 OS=Arabidopsis thaliana GN=SARD1 PE=1 SV=1}	{bvg:104893586; - - - - -}	{NA}	{GO:0003676; nucleic acid binding; molecular_function GO:0006950; response to stress; biological_process GO:0005516; Calmodulin binding; molecular_function GO:0005622; intracellular; cellular_component}	{NA}	{PF00570:HRDC domain PF07887:Calmodulin binding protein-like}
transcript_HQ_SAB_transcript14714/f2p0/1938	2.6531e-07	8.93e-07	{XP_010671437.1; PREDICTED: protein IQ-DOMAIN 1 [Beta vulgaris subsp. vulgaris]}	{NA}	{bvg:104888236; - - - - -}	{NA}	{GO:0005515; protein binding; molecular_function}	{XM_010673135.2; PREDICTED: Beta vulgaris subsp. vulgaris protein IQ-DOMAIN 1 (LOC104888236), mRNA}	{PF00612:IQ Calmodulin-binding motif}
transcript_HQ_SAB_transcript14397/f2p0/1956	1.9178e-37	2.0779e-36	{XP_010679220.1; PREDICTED: uncharacterized protein LOC104894639 isoform X3 [Beta vulgaris subsp. vulgaris]}	{sp|P0C1S9|DGLB_RAT; Sn1-specific diacylglycerol lipase beta OS=Rattus norvegicus GN=Daglb PE=1 SV=1}	{bvg:104894639; - - - - -}	{At2g42450; KOG2088 Predicted lipase/Calmodulin-binding heat-shock protein IOT Lipid transport and metabolism ; Posttranslational modification, protein turnover, chaperones ; Signal transduction mechanisms ;}	{GO:0006629; lipid metabolic process; biological_process GO:0047746; chlorophyllase activity; molecular_function GO:0015996; chlorophyll catabolic process; biological_process}	{XM_010680918.2; PREDICTED: Beta vulgaris subsp. vulgaris uncharacterized LOC104894639 (LOC104894639), transcript variant X3, mRNA}	{PF01764:Lipase (class 3) PF12740:Chlorophyllase enzyme}
transcript_HQ_SAB_transcript1429/f2p0/3800	1.888e-12	8.894e-12	{KNA12404.1; hypothetical protein SOVF_126330 [Spinacia oleracea]}	{sp|Q8GSA7|CMTA3_ARATH; Calmodulin-binding transcription activator 3 OS=Arabidopsis thaliana GN=CMTA3 PE=1 SV=1}	{sly:101055571; K21596 - - - -}	{At2g22300; KOG0520 Uncharacterized conserved protein, contains IPT/TIG domain S Function unknown ;}	{GO:0005515; protein binding; molecular_function GO:0003677; DNA binding; molecular_function GO:0005634; nucleus; cellular_component}	{XM_010692190.2; PREDICTED: Beta vulgaris subsp. vulgaris Calmodulin-binding transcription activator 2 (LOC104904019), transcript variant X2, mRNA}	{PF03859:CG-1 domain PF01833:IPT/TIG domain}
transcript_HQ_SAB_transcript1385/f3p0/3821	0.0084974	0.016883	{XP_010669615.1; PREDICTED: BAG family molecular chaperone regulator 6 [Beta vulgaris subsp. vulgaris]}	{sp|O82345|BAG6_ARATH; BAG family molecular chaperone regulator 6 OS=Arabidopsis thaliana GN=BAG6 PE=1 SV=1}	{bvg:104886797; - - - - -}	{NA}	{GO:0051087; chaperone binding; molecular_function GO:0005515; protein binding; molecular_function}	{NA}	{PF00612:IQ Calmodulin-binding motif PF02179:BAG domain}
transcript_HQ_SAB_transcript130/f2p0/5423	0.0068401	0.013819	{XP_010684809.1; PREDICTED: myosin-6 [Beta vulgaris subsp. vulgaris]}	{sp|Q9LKB9|MYO6_ARATH; Myosin-6 OS=Arabidopsis thaliana GN=XI-2 PE=1 SV=1}	{pop:POPTR_0002s25560g; K10357 MYO5 myosin V - -}	{At5g43900; KOG0160 Myosin class V heavy chain Z Cytoskeleton ;}	{GO:0000160; two-component signal transduction system (phosphorelay); biological_process GO:0006109; regulation of carbohydrate metabolic process; biological_process GO:0005515; protein binding; molecular_function GO:0003700; sequence-specific DNA binding transcription factor activity; molecular_function GO:0016887; ATPase activity; molecular_function GO:0004672; protein kinase activity; molecula…	{XM_019250887.1; PREDICTED: Beta vulgaris subsp. vulgaris myosin-6 (LOC104899335), transcript variant X2, mRNA}	{PF01166:TSC-22/dip/bun family PF00063:Myosin head (motor domain) PF07475:HPr Serine kinase C-terminal domain PF00005:ABC transporter PF02736:Myosin N-terminal SH3-like domain PF00612:IQ Calmodulin-binding motif}
transcript_HQ_SAB_transcript10932/f3p0/2220	0.0079006	0.015783	{KNA17917.1; hypothetical protein SOVF_075530 [Spinacia oleracea]}	{NA}	{bvg:104887484; - - - - -}	{NA}	{GO:0005516; Calmodulin binding; molecular_function}	{XM_010672114.2; PREDICTED: Beta vulgaris subsp. vulgaris hypothetical protein (LOC104887484), mRNA}	{PF07839:Plant Calmodulin-binding domain}
transcript_HQ_SAB_transcript10834/f3p0/2199	3.7457e-12	1.7344e-11	{XP_010687882.1; PREDICTED: Calmodulin-binding receptor-like cytoplasmic kinase 3 [Beta vulgaris subsp. vulgaris]}	{sp|Q9ASQ5|CRCK3_ARATH; Calmodulin-binding receptor-like cytoplasmic kinase 3 OS=Arabidopsis thaliana GN=CRCK3 PE=2 SV=1}	{vvi:100250654; - - - - -}	{At2g11520; KOG1187 Serine/threonine protein kinase T Signal transduction mechanisms ;}	{GO:0005524; ATP binding; molecular_function GO:0003978; UDP-glucose 4-epimerase activity; molecular_function GO:0009103; lipopolysaccharide biosynthetic process; biological_process GO:0004672; protein kinase activity; molecular_function GO:0006468; protein phosphorylation; biological_process}	{XM_010689580.2; PREDICTED: Beta vulgaris subsp. vulgaris Calmodulin-binding receptor-like cytoplasmic kinase 3 (LOC104901949), mRNA}	{PF08485:Polysaccharide biosynthesis protein C-terminal PF00069:Protein kinase domain PF07714:Protein tyrosine kinase}
transcript_HQ_BAB_transcript976/f3p0/4408	1.0729e-96	2.9905e-95	{XP_010684809.1; PREDICTED: myosin-6 [Beta vulgaris subsp. vulgaris]}	{sp|Q9LKB9|MYO6_ARATH; Myosin-6 OS=Arabidopsis thaliana GN=XI-2 PE=1 SV=1}	{pop:POPTR_0002s25560g; K10357 MYO5 myosin V - -}	{At5g43900; KOG0160 Myosin class V heavy chain Z Cytoskeleton ;}	{GO:0005515; protein binding; molecular_function GO:0006355; regulation of transcription, DNA-dependent; biological_process GO:0003700; sequence-specific DNA binding transcription factor activity; molecular_function GO:0016459; myosin complex; cellular_component GO:0005524; ATP binding; molecular_function GO:0003774; motor activity; molecular_function}	{XM_019250887.1; PREDICTED: Beta vulgaris subsp. vulgaris myosin-6 (LOC104899335), transcript variant X2, mRNA}	{PF00612:IQ Calmodulin-binding motif PF01166:TSC-22/dip/bun family PF00063:Myosin head (motor domain)}
transcript_HQ_BAB_transcript9694/f2p0/2602	2.45e-06	7.5643e-06	{XP_010692996.1; PREDICTED: probable cyclic nucleotide-gated ion channel 14 [Beta vulgaris subsp. vulgaris]}	{sp|Q8L7Z0|CNG17_ARATH; Cyclic nucleotide-gated ion channel 17 OS=Arabidopsis thaliana GN=CNGC17 PE=1 SV=1}	{pvu:PHAVU_009G102100g; K05391 CNGF cyclic nucleotide gated channel, other eukaryote - ko04626; Organismal Systems; Environmental adaptation; Plant-pathogen interaction}	{At4g30360; KOG0498 K+-channel ERG and related proteins, contain PAS/PAC sensor domain PT Inorganic ion transport and metabolism ; Signal transduction mechanisms ;}	{GO:0055085; transmembrane transport; biological_process GO:0005515; protein binding; molecular_function GO:0005216; ion channel activity; molecular_function GO:0006811; ion transport; biological_process GO:0016020; membrane; cellular_component}	{XM_010694695.2; PREDICTED: Beta vulgaris subsp. vulgaris cyclic nucleotide-gated ion channel 17 (LOC104906014), mRNA}	{PF00612:IQ Calmodulin-binding motif PF00520:Ion transport protein}
transcript_HQ_BAB_transcript9226/f2p0/2658	1.2715e-08	4.7054e-08	{KNA25359.1; hypothetical protein SOVF_007260 [Spinacia oleracea]}	{sp|Q91WC9|DGLB_MOUSE; Sn1-specific diacylglycerol lipase beta OS=Mus musculus GN=Daglb PE=1 SV=2}	{bvg:104888536; - - - - -}	{At3g49050; KOG2088 Predicted lipase/Calmodulin-binding heat-shock protein IOT Lipid transport and metabolism ; Posttranslational modification, protein turnover, chaperones ; Signal transduction mechanisms ;}	{GO:0006629; lipid metabolic process; biological_process GO:0016042; lipid catabolic process; biological_process}	{XM_010673555.2; PREDICTED: Beta vulgaris subsp. vulgaris hypothetical protein (LOC104888536), transcript variant X1, mRNA}	{PF03893:Lipase 3 N-terminal region PF01764:Lipase (class 3)}
transcript_HQ_BAB_transcript8602/f2p0/2742	0.0007989	0.0018567	{XP_010692996.1; PREDICTED: probable cyclic nucleotide-gated ion channel 14 [Beta vulgaris subsp. vulgaris]}	{sp|Q8L7Z0|CNG17_ARATH; Cyclic nucleotide-gated ion channel 17 OS=Arabidopsis thaliana GN=CNGC17 PE=1 SV=1}	{pvu:PHAVU_009G102100g; K05391 CNGF cyclic nucleotide gated channel, other eukaryote - ko04626; Organismal Systems; Environmental adaptation; Plant-pathogen interaction}	{At4g30360; KOG0498 K+-channel ERG and related proteins, contain PAS/PAC sensor domain PT Inorganic ion transport and metabolism ; Signal transduction mechanisms ;}	{GO:0006811; ion transport; biological_process GO:0016020; membrane; cellular_component GO:0005216; ion channel activity; molecular_function GO:0005515; protein binding; molecular_function GO:0055085; transmembrane transport; biological_process}	{XM_010694695.2; PREDICTED: Beta vulgaris subsp. vulgaris cyclic nucleotide-gated ion channel 17 (LOC104906014), mRNA}	{PF00612:IQ Calmodulin-binding motif PF00520:Ion transport protein}
transcript_HQ_BAB_transcript8551/f4p0/2749	1.6034e-34	1.6233e-33	{XP_010680435.1; PREDICTED: CDPK-related kinase 5 [Beta vulgaris subsp. vulgaris]}	{sp|Q9SCS2|CAMK5_ARATH; CDPK-related kinase 5 OS=Arabidopsis thaliana GN=CRK5 PE=2 SV=1}	{pper:PRUPE_ppa003111mg; - - - - -}	{At3g50530; KOG0032 Ca2+/Calmodulin-dependent protein kinase, EF-Hand protein superfamily T Signal transduction mechanisms ;}	{GO:0004672; protein kinase activity; molecular_function GO:0016773; phosphotransferase activity, alcohol group as acceptor; molecular_function GO:0005509; calcium ion binding; molecular_function GO:0005524; ATP binding; molecular_function GO:0016020; membrane; cellular_component GO:0006468; protein phosphorylation; biological_process}	{XM_010682133.2; PREDICTED: Beta vulgaris subsp. vulgaris CDPK-related kinase 5 (LOC104895576), mRNA}	{PF00069:Protein kinase domain PF07714:Protein tyrosine kinase PF06293:Lipopolysaccharide kinase (Kdo/WaaP) family PF00036:EF hand}
transcript_HQ_BAB_transcript7487/f2p0/2898	1.4391e-10	6.0726e-10	{KNA10165.1; hypothetical protein SOVF_146520 [Spinacia oleracea]}	{NA}	{bvg:104887484; - - - - -}	{NA}	{GO:0005516; Calmodulin binding; molecular_function}	{NA}	{PF07839:Plant Calmodulin-binding domain}
transcript_HQ_BAB_transcript7198/f2p0/2921	2.2052e-17	1.3117e-16	{KNA10693.1; hypothetical protein SOVF_141970 [Spinacia oleracea]}	{sp|Q9LET1|CAMK7_ARATH; CDPK-related kinase 7 OS=Arabidopsis thaliana GN=CRK7 PE=1 SV=1}	{bvg:104889509; - - - - -}	{At3g56760; KOG0032 Ca2+/Calmodulin-dependent protein kinase, EF-Hand protein superfamily T Signal transduction mechanisms ;}	{GO:0016020; membrane; cellular_component GO:0005509; calcium ion binding; molecular_function GO:0016773; phosphotransferase activity, alcohol group as acceptor; molecular_function GO:0005524; ATP binding; molecular_function GO:0006468; protein phosphorylation; biological_process GO:0004672; protein kinase activity; molecular_function}	{XM_010674747.2; PREDICTED: Beta vulgaris subsp. vulgaris CDPK-related kinase 7 (LOC104889509), mRNA}	{PF00069:Protein kinase domain PF13405:EF-hand domain PF07714:Protein tyrosine kinase PF06293:Lipopolysaccharide kinase (Kdo/WaaP) family PF13499:EF-hand domain pair}
transcript_HQ_BAB_transcript6205/f3p0/3067	2.2745e-46	2.9737e-45	{ONL97467.1; Calmodulin-7 [Zea mays]}	{sp|P62200|CALM1_DAUCA; Calmodulin-1/11/16 OS=Daucus carota GN=CAM-1 PE=2 SV=2}	{cit:102620326; K02183 CALM Calmodulin - ko04014; Environmental Information Processing; Signal transduction; Ras signaling pathway | ko04015; Environmental Information Processing; Signal transduction; Rap1 signaling pathway | ko04016; Environmental Information Processing; Signal transduction; MAPK signaling pathway - plant | ko04371; Environmental Information Processing; Signal transduction; Apel…	{At3g43810; KOG0027 Calmodulin and related proteins (EF-Hand superfamily) T Signal transduction mechanisms ;}	{GO:0006351; transcription, DNA-dependent; biological_process GO:0005515; protein binding; molecular_function GO:0003899; DNA-directed RNA polymerase activity; molecular_function GO:0015774; polysaccharide transport; biological_process GO:0016020; membrane; cellular_component GO:0007165; signal transduction; biological_process GO:0005578; proteinaceous extracellular matrix; cellular_component GO:…	{XM_010674913.2; PREDICTED: Beta vulgaris subsp. vulgaris Calmodulin (LOC104889645), mRNA}	{PF02563:Polysaccharide biosynthesis/export protein PF13405:EF-hand domain PF00036:EF hand PF13833:EF-hand domain pair PF13202:EF hand PF12763:Cytoskeletal-regulatory complex EF hand PF03874:RNA polymerase Rpb4 PF13499:EF-hand domain pair PF10591:Secreted protein acidic and rich in cysteine Ca binding region}
transcript_HQ_BAB_transcript6089/f3p0/3080	8.6165e-82	1.9745e-80	{ONL97467.1; Calmodulin-7 [Zea mays]}	{sp|P59220|CALM7_ARATH; Calmodulin-7 OS=Arabidopsis thaliana GN=CAM7 PE=1 SV=2}	{cit:102620326; K02183 CALM Calmodulin - ko04014; Environmental Information Processing; Signal transduction; Ras signaling pathway | ko04015; Environmental Information Processing; Signal transduction; Rap1 signaling pathway | ko04016; Environmental Information Processing; Signal transduction; MAPK signaling pathway - plant | ko04371; Environmental Information Processing; Signal transduction; Apel…	{At3g43810; KOG0027 Calmodulin and related proteins (EF-Hand superfamily) T Signal transduction mechanisms ;}	{GO:0006351; transcription, DNA-dependent; biological_process GO:0005515; protein binding; molecular_function GO:0015774; polysaccharide transport; biological_process GO:0003899; DNA-directed RNA polymerase activity; molecular_function GO:0016020; membrane; cellular_component GO:0005578; proteinaceous extracellular matrix; cellular_component GO:0007165; signal transduction; biological_process GO:…	{XM_010674913.2; PREDICTED: Beta vulgaris subsp. vulgaris Calmodulin (LOC104889645), mRNA}	{PF13405:EF-hand domain PF02563:Polysaccharide biosynthesis/export protein PF00036:EF hand PF12763:Cytoskeletal-regulatory complex EF hand PF13202:EF hand PF13833:EF-hand domain pair PF10591:Secreted protein acidic and rich in cysteine Ca binding region PF13499:EF-hand domain pair PF03874:RNA polymerase Rpb4}
transcript_HQ_BAB_transcript543/f2p0/4774	1.8937e-05	5.3584e-05	{XP_010694426.1; PREDICTED: myosin-2 isoform X1 [Beta vulgaris subsp. vulgaris]}	{sp|F4K0A6|MYO2_ARATH; Myosin-2 OS=Arabidopsis thaliana GN=VIII-2 PE=2 SV=1}	{cit:102625476; K10357 MYO5 myosin V - -}	{At5g54280; KOG0160 Myosin class V heavy chain Z Cytoskeleton ;}	{GO:0005524; ATP binding; molecular_function GO:0004672; protein kinase activity; molecular_function GO:0006109; regulation of carbohydrate metabolic process; biological_process GO:0006810; transport; biological_process GO:0016459; myosin complex; cellular_component GO:0005515; protein binding; molecular_function GO:0003774; motor activity; molecular_function GO:0000160; two-component signal tran…	{XM_010696124.2; PREDICTED: Beta vulgaris subsp. vulgaris myosin-2 (LOC104907230), transcript variant X1, mRNA}	{PF02736:Myosin N-terminal SH3-like domain PF00063:Myosin head (motor domain) PF07475:HPr Serine kinase C-terminal domain PF00612:IQ Calmodulin-binding motif PF00437:Type II/IV secretion system protein}
transcript_HQ_BAB_transcript4054/f5p0/3450	6.16e-16	3.4313e-15	{XP_010684809.1; PREDICTED: myosin-6 [Beta vulgaris subsp. vulgaris]}	{sp|Q9LKB9|MYO6_ARATH; Myosin-6 OS=Arabidopsis thaliana GN=XI-2 PE=1 SV=1}	{pop:POPTR_0002s25560g; K10357 MYO5 myosin V - -}	{At5g43900; KOG0160 Myosin class V heavy chain Z Cytoskeleton ;}	{GO:0000160; two-component signal transduction system (phosphorelay); biological_process GO:0003774; motor activity; molecular_function GO:0000155; two-component sensor activity; molecular_function GO:0005515; protein binding; molecular_function GO:0016887; ATPase activity; molecular_function GO:0006109; regulation of carbohydrate metabolic process; biological_process GO:0004672; protein kinase a…	{XM_019250887.1; PREDICTED: Beta vulgaris subsp. vulgaris myosin-6 (LOC104899335), transcript variant X2, mRNA}	{PF00612:IQ Calmodulin-binding motif PF00005:ABC transporter PF02736:Myosin N-terminal SH3-like domain PF00063:Myosin head (motor domain) PF07475:HPr Serine kinase C-terminal domain}
transcript_HQ_BAB_transcript362/f2p0/5003	3.2037e-59	5.2757e-58	{KNA10545.1; hypothetical protein SOVF_143360 [Spinacia oleracea]}	{sp|F4K5J1|MYO17_ARATH; Myosin-17 OS=Arabidopsis thaliana GN=XI-K PE=1 SV=2}	{pop:POPTR_0001s20640g; K10357 MYO5 myosin V - -}	{At5g20490; KOG0160 Myosin class V heavy chain Z Cytoskeleton ;}	{GO:0005515; protein binding; molecular_function GO:0042802; identical protein binding; molecular_function GO:0006914; autophagy; biological_process GO:0043015; gamma-tubulin binding; molecular_function}	{XM_010687042.2; PREDICTED: Beta vulgaris subsp. vulgaris myosin-17 (LOC104899777), mRNA}	{PF00612:IQ Calmodulin-binding motif PF04111:Autophagy protein Apg6 PF14073:Centrosome localisation domain of Cep57}
transcript_HQ_BAB_transcript3094/f6p0/3623	0.0012442	0.0028173	{KNA07166.1; hypothetical protein SOVF_174400 isoform B [Spinacia oleracea]}	{sp|O23463|CMTA5_ARATH; Calmodulin-binding transcription activator 5 OS=Arabidopsis thaliana GN=CMTA5 PE=2 SV=2}	{bvg:104888404; K21596 - - - -}	{At4g16150; KOG0520 Uncharacterized conserved protein, contains IPT/TIG domain S Function unknown ;}	{GO:0005634; nucleus; cellular_component GO:0003677; DNA binding; molecular_function GO:0005515; protein binding; molecular_function}	{XM_019248541.1; PREDICTED: Beta vulgaris subsp. vulgaris Calmodulin-binding transcription activator 6 (LOC104888404), transcript variant X3, mRNA}	{PF00023:Ankyrin repeat PF13606:Ankyrin repeat PF00612:IQ Calmodulin-binding motif PF03859:CG-1 domain}
transcript_HQ_BAB_transcript3022/f2p0/3687	1.3116e-23	9.8062e-23	{XP_010682739.1; PREDICTED: Calmodulin-binding transcription activator 4 [Beta vulgaris subsp. vulgaris]}	{sp|Q9FYG2|CMTA4_ARATH; Calmodulin-binding transcription activator 4 OS=Arabidopsis thaliana GN=CMTA4 PE=1 SV=1}	{pmum:103322088; K21596 - - - -}	{At1g67310; KOG0520 Uncharacterized conserved protein, contains IPT/TIG domain S Function unknown ;}	{GO:0005515; protein binding; molecular_function GO:0005634; nucleus; cellular_component GO:0003677; DNA binding; molecular_function}	{XM_010684437.2; PREDICTED: Beta vulgaris subsp. vulgaris Calmodulin-binding transcription activator 4 (LOC104897544), mRNA}	{PF01833:IPT/TIG domain PF03859:CG-1 domain PF00023:Ankyrin repeat PF00612:IQ Calmodulin-binding motif PF13606:Ankyrin repeat}
transcript_HQ_BAB_transcript2885/f3p0/3719	1.2691e-09	5.0204e-09	{XP_010690492.1; PREDICTED: Calmodulin-binding transcription activator 2 isoform X2 [Beta vulgaris subsp. vulgaris]}	{sp|Q8GSA7|CMTA3_ARATH; Calmodulin-binding transcription activator 3 OS=Arabidopsis thaliana GN=CMTA3 PE=1 SV=1}	{sly:101055571; K21596 - - - -}	{At2g22300; KOG0520 Uncharacterized conserved protein, contains IPT/TIG domain S Function unknown ;}	{GO:0003677; DNA binding; molecular_function GO:0005634; nucleus; cellular_component GO:0005515; protein binding; molecular_function}	{XM_010692190.2; PREDICTED: Beta vulgaris subsp. vulgaris Calmodulin-binding transcription activator 2 (LOC104904019), transcript variant X2, mRNA}	{PF01833:IPT/TIG domain PF03859:CG-1 domain PF00023:Ankyrin repeat PF00612:IQ Calmodulin-binding motif PF13606:Ankyrin repeat}
transcript_HQ_BAB_transcript2375/f3p0/3839	0.00044314	0.0010624	{XP_010673074.1; PREDICTED: Calmodulin-interacting protein 111 isoform X1 [Beta vulgaris subsp. vulgaris]}	{sp|Q9LET7|CI111_ARATH; Calmodulin-interacting protein 111 OS=Arabidopsis thaliana GN=CIP111 PE=1 SV=1}	{bvg:104889528; - - - - -}	{At3g56690; KOG0733 Nuclear AAA ATPase (VCP subfamily) O Posttranslational modification, protein turnover, chaperones ;}	{GO:0005524; ATP binding; molecular_function GO:0016887; ATPase activity; molecular_function GO:0008134; transcription factor binding; molecular_function GO:0002949; NA GO:0003723; RNA binding; molecular_function GO:0003724; RNA helicase activity; molecular_function GO:0009378; four-way junction helicase activity; molecular_function GO:0003678; DNA helicase activity; molecular_function GO:0006310…	{XM_010674772.2; PREDICTED: Beta vulgaris subsp. vulgaris Calmodulin-interacting protein 111 (LOC104889528), transcript variant X1, mRNA}	{PF14532:Sigma-54 interaction domain PF01695:IstB-like ATP binding protein PF00910:RNA helicase PF05496:Holliday junction DNA helicase ruvB N-terminus PF00004:ATPase family associated with various cellular activities (AAA) PF02562:PhoH-like protein PF06068:TIP49 C-terminus PF01443:Viral (Superfamily 1) RNA helicase PF07726:ATPase family associated with various cellular activities (AAA) PF07728:AA…
transcript_HQ_BAB_transcript20454/f3p0/948	3.1737e-247	2.599e-245	{XP_010673215.1; PREDICTED: Calmodulin [Beta vulgaris subsp. vulgaris]}	{sp|P04353|CALM_SPIOL; Calmodulin OS=Spinacia oleracea PE=1 SV=2}	{bvg:104889645; K02183 CALM Calmodulin - ko04014; Environmental Information Processing; Signal transduction; Ras signaling pathway | ko04015; Environmental Information Processing; Signal transduction; Rap1 signaling pathway | ko04016; Environmental Information Processing; Signal transduction; MAPK signaling pathway - plant | ko04371; Environmental Information Processing; Signal transduction; Apel…	{At3g43810; KOG0027 Calmodulin and related proteins (EF-Hand superfamily) T Signal transduction mechanisms ;}	{GO:0007165; signal transduction; biological_process GO:0005578; proteinaceous extracellular matrix; cellular_component GO:0005509; calcium ion binding; molecular_function GO:0015159; polysaccharide transmembrane transporter activity; molecular_function GO:0015774; polysaccharide transport; biological_process GO:0003899; DNA-directed RNA polymerase activity; molecular_function GO:0005515; protein…	{XM_010674913.2; PREDICTED: Beta vulgaris subsp. vulgaris Calmodulin (LOC104889645), mRNA}	{PF12763:Cytoskeletal-regulatory complex EF hand PF13202:EF hand PF13833:EF-hand domain pair PF10591:Secreted protein acidic and rich in cysteine Ca binding region PF13499:EF-hand domain pair PF03874:RNA polymerase Rpb4 PF13405:EF-hand domain PF02563:Polysaccharide biosynthesis/export protein PF00036:EF hand}
transcript_HQ_BAB_transcript20335/f2p0/1077	4.5444e-12	2.0891e-11	{XP_010675055.1; PREDICTED: phosphoenolpyruvate carboxylase kinase 2 [Beta vulgaris subsp. vulgaris]}	{sp|Q9SPK4|PPCK1_ARATH; Phosphoenolpyruvate carboxylase kinase 1 OS=Arabidopsis thaliana GN=PPCK1 PE=1 SV=1}	{bvg:104891102; K04515 CAMK2 calcium/Calmodulin-dependent protein kinase (CaM kinase) II 2.7.11.17 ko04012; Environmental Information Processing; Signal transduction; ErbB signaling pathway | ko04310; Environmental Information Processing; Signal transduction; Wnt signaling pathway | ko04066; Environmental Information Processing; Signal transduction; HIF-1 signaling pathway | ko04020; Environmenta…	{At1g08650; KOG0032 Ca2+/Calmodulin-dependent protein kinase, EF-Hand protein superfamily T Signal transduction mechanisms ;}	{GO:0016773; phosphotransferase activity, alcohol group as acceptor; molecular_function GO:0016020; membrane; cellular_component GO:0005524; ATP binding; molecular_function GO:0006468; protein phosphorylation; biological_process GO:0004672; protein kinase activity; molecular_function}	{NA}	{PF06293:Lipopolysaccharide kinase (Kdo/WaaP) family PF05445:Poxvirus serine/threonine protein kinase PF00069:Protein kinase domain PF07714:Protein tyrosine kinase}
transcript_HQ_BAB_transcript19507/f2p0/1405	4.4926e-15	2.4109e-14	{XP_010686348.1; PREDICTED: protein IQ-DOMAIN 1 [Beta vulgaris subsp. vulgaris]}	{sp|Q9SF32|IQD1_ARATH; Protein IQ-DOMAIN 1 OS=Arabidopsis thaliana GN=IQD1 PE=1 SV=1}	{vvi:100258909; - - - - -}	{NA}	{GO:0005515; protein binding; molecular_function}	{XM_010688046.2; PREDICTED: Beta vulgaris subsp. vulgaris protein IQ-DOMAIN 1 (LOC104900587), transcript variant X1, mRNA}	{PF00612:IQ Calmodulin-binding motif}
transcript_HQ_BAB_transcript18114/f3p0/1647	3.9183e-13	1.919e-12	{XP_010685626.1; PREDICTED: Calmodulin-binding receptor-like cytoplasmic kinase 2 [Beta vulgaris subsp. vulgaris]}	{sp|Q9FIL7|CRCK1_ARATH; Calmodulin-binding receptor-like cytoplasmic kinase 1 OS=Arabidopsis thaliana GN=CRCK1 PE=1 SV=1}	{jcu:105630932; K04733 IRAK4 interleukin-1 receptor-associated kinase 4 2.7.11.1 ko04064; Environmental Information Processing; Signal transduction; NF-kappa B signaling pathway | ko04620; Organismal Systems; Immune system; Toll-like receptor signaling pathway | ko04624; Organismal Systems; Immune system; Toll and Imd signaling pathway | ko04621; Organismal Systems; Immune system; NOD-like recept…	{At5g58940; KOG1187 Serine/threonine protein kinase T Signal transduction mechanisms ;}	{GO:0004672; protein kinase activity; molecular_function GO:0006468; protein phosphorylation; biological_process GO:0005524; ATP binding; molecular_function}	{XM_010687324.2; PREDICTED: Beta vulgaris subsp. vulgaris Calmodulin-binding receptor-like cytoplasmic kinase 2 (LOC104900009), mRNA}	{PF00069:Protein kinase domain PF07714:Protein tyrosine kinase}
transcript_HQ_BAB_transcript1774/f2p0/4011	0.017908	0.03339	{KNA10545.1; hypothetical protein SOVF_143360 [Spinacia oleracea]}	{sp|F4K5J1|MYO17_ARATH; Myosin-17 OS=Arabidopsis thaliana GN=XI-K PE=1 SV=2}	{pop:POPTR_0001s20640g; K10357 MYO5 myosin V - -}	{At5g20490; KOG0160 Myosin class V heavy chain Z Cytoskeleton ;}	{GO:0016459; myosin complex; cellular_component GO:0003774; motor activity; molecular_function GO:0005524; ATP binding; molecular_function GO:0005515; protein binding; molecular_function}	{XM_010687042.2; PREDICTED: Beta vulgaris subsp. vulgaris myosin-17 (LOC104899777), mRNA}	{PF00612:IQ Calmodulin-binding motif PF00063:Myosin head (motor domain)}
transcript_HQ_BAB_transcript174/f3p0/5471	0	0	{KNA10150.1; hypothetical protein SOVF_147120 [Spinacia oleracea]}	{sp|O81108|ACA2_ARATH; calcium-transporting ATPase 2, plasma membrane-type OS=Arabidopsis thaliana GN=ACA2 PE=1 SV=1}	{crb:CARUB_v10004056mg; K01537 E3.6.3.8 Ca2+-transporting ATPase 3.6.3.8 -}	{At4g37640; KOG0204 Calcium transporting ATPase P Inorganic ion transport and metabolism ;}	{GO:0000166; nucleotide binding; molecular_function GO:0046872; metal ion binding; molecular_function GO:0005516; Calmodulin binding; molecular_function}	{XM_010681329.2; PREDICTED: Beta vulgaris subsp. vulgaris calcium-transporting ATPase 2, plasma membrane-type (LOC104894949), mRNA}	{PF00122:E1-E2 ATPase PF12515:Ca2+-ATPase N terminal autoinhibitory domain}
transcript_HQ_BAB_transcript17084/f2p0/1795	0.00062028	0.0014638	{KNA15067.1; hypothetical protein SOVF_101580 [Spinacia oleracea]}	{sp|P04464|CALM_WHEAT; Calmodulin OS=Triticum aestivum PE=1 SV=3}	{ppp:PHYPADRAFT_180168; K02183 CALM Calmodulin - ko04014; Environmental Information Processing; Signal transduction; Ras signaling pathway | ko04015; Environmental Information Processing; Signal transduction; Rap1 signaling pathway | ko04016; Environmental Information Processing; Signal transduction; MAPK signaling pathway - plant | ko04371; Environmental Information Processing; Signal transducti…	{At3g43810; KOG0027 Calmodulin and related proteins (EF-Hand superfamily) T Signal transduction mechanisms ;}	{GO:0005578; proteinaceous extracellular matrix; cellular_component GO:0007165; signal transduction; biological_process GO:0005509; calcium ion binding; molecular_function}	{XM_010667276.2; PREDICTED: Beta vulgaris subsp. vulgaris hypothetical protein (LOC104882859), mRNA}	{PF10591:Secreted protein acidic and rich in cysteine Ca binding region PF00036:EF hand PF13499:EF-hand domain pair PF13405:EF-hand domain PF13202:EF hand PF13833:EF-hand domain pair}
transcript_HQ_BAB_transcript16908/f2p0/1803	3.2444e-21	2.227e-20	{KNA18369.1; hypothetical protein SOVF_071400 [Spinacia oleracea]}	{sp|Q9LFA4|IQM3_ARATH; IQ domain-containing protein IQM3 OS=Arabidopsis thaliana GN=IQM3 PE=2 SV=1}	{jcu:105629472; - - - - -}	{NA}	{GO:0005515; protein binding; molecular_function}	{XM_010685478.2; PREDICTED: Beta vulgaris subsp. vulgaris hypothetical protein (LOC104898395), mRNA}	{PF00612:IQ Calmodulin-binding motif}
transcript_HQ_BAB_transcript16638/f3p0/1813	9.9368e-13	4.7639e-12	{KNA15067.1; hypothetical protein SOVF_101580 [Spinacia oleracea]}	{sp|P04464|CALM_WHEAT; Calmodulin OS=Triticum aestivum PE=1 SV=3}	{ppp:PHYPADRAFT_180168; K02183 CALM Calmodulin - ko04014; Environmental Information Processing; Signal transduction; Ras signaling pathway | ko04015; Environmental Information Processing; Signal transduction; Rap1 signaling pathway | ko04016; Environmental Information Processing; Signal transduction; MAPK signaling pathway - plant | ko04371; Environmental Information Processing; Signal transducti…	{At3g43810; KOG0027 Calmodulin and related proteins (EF-Hand superfamily) T Signal transduction mechanisms ;}	{GO:0005509; calcium ion binding; molecular_function GO:0006313; transposition, DNA-mediated; biological_process GO:0003677; DNA binding; molecular_function GO:0005515; protein binding; molecular_function}	{XM_010667276.2; PREDICTED: Beta vulgaris subsp. vulgaris hypothetical protein (LOC104882859), mRNA}	{PF13202:EF hand PF09077:Mu B transposition protein, C terminal PF13833:EF-hand domain pair PF13405:EF-hand domain PF12763:Cytoskeletal-regulatory complex EF hand PF13499:EF-hand domain pair PF00036:EF hand}
transcript_HQ_BAB_transcript15733/f6p0/1910	9.8359e-34	9.7657e-33	{XP_010676531.1; PREDICTED: protein IQ-DOMAIN 14 [Beta vulgaris subsp. vulgaris]}	{NA}	{bvg:104892330; - - - - -}	{NA}	{GO:0016021; integral to membrane; cellular_component GO:0005886; plasma membrane; cellular_component GO:0005515; protein binding; molecular_function}	{XM_016040819.1; PREDICTED: Ziziphus jujuba protein IQ-DOMAIN 14 (LOC107430039), mRNA}	{PF10099:Anti-sigma-K factor rskA PF00612:IQ Calmodulin-binding motif}
transcript_HQ_BAB_transcript15639/f2p0/1953	8.9852e-05	0.00023524	{XP_010675421.1; PREDICTED: Serine/threonine-protein kinase PEPKR2 [Beta vulgaris subsp. vulgaris]}	{sp|Q8W490|PEPK2_ARATH; Serine/threonine-protein kinase PEPKR2 OS=Arabidopsis thaliana GN=PEPKR2 PE=2 SV=1}	{bvg:104891422; - - - - -}	{At1g12680; KOG0032 Ca2+/Calmodulin-dependent protein kinase, EF-Hand protein superfamily T Signal transduction mechanisms ;}	{GO:0004672; protein kinase activity; molecular_function GO:0005524; ATP binding; molecular_function GO:0016773; phosphotransferase activity, alcohol group as acceptor; molecular_function GO:0016020; membrane; cellular_component GO:0006468; protein phosphorylation; biological_process}	{XM_010677123.2; PREDICTED: Beta vulgaris subsp. vulgaris Serine/threonine-protein kinase PEPKR2 (LOC104891422), transcript variant X2, mRNA}	{PF00069:Protein kinase domain PF07714:Protein tyrosine kinase PF06293:Lipopolysaccharide kinase (Kdo/WaaP) family}
transcript_HQ_BAB_transcript15340/f2p0/1972	0.0026383	0.0056932	{KNA18036.1; hypothetical protein SOVF_074510 [Spinacia oleracea]}	{sp|Q9SF32|IQD1_ARATH; Protein IQ-DOMAIN 1 OS=Arabidopsis thaliana GN=IQD1 PE=1 SV=1}	{cic:CICLE_v10028475mg; - - - - -}	{NA}	{GO:0005515; protein binding; molecular_function}	{XM_010687155.2; PREDICTED: Beta vulgaris subsp. vulgaris protein IQ-DOMAIN 1 (LOC104899867), transcript variant X4, mRNA}	{PF00612:IQ Calmodulin-binding motif}
transcript_HQ_BAB_transcript14760/f3p0/2024	1.8705e-180	1.0107e-178	{XP_010669377.1; PREDICTED: protein IQ-DOMAIN 1 [Beta vulgaris subsp. vulgaris]}	{sp|Q9SF32|IQD1_ARATH; Protein IQ-DOMAIN 1 OS=Arabidopsis thaliana GN=IQD1 PE=1 SV=1}	{bvg:104886612; - - - - -}	{NA}	{GO:0005515; protein binding; molecular_function}	{XM_010671075.2; PREDICTED: Beta vulgaris subsp. vulgaris protein IQ-DOMAIN 1 (LOC104886612), mRNA}	{PF00612:IQ Calmodulin-binding motif}
transcript_HQ_BAB_transcript14758/f4p0/2020	8.705e-163	4.1423e-161	{KNA18369.1; hypothetical protein SOVF_071400 [Spinacia oleracea]}	{sp|Q9LFA4|IQM3_ARATH; IQ domain-containing protein IQM3 OS=Arabidopsis thaliana GN=IQM3 PE=2 SV=1}	{jcu:105629472; - - - - -}	{NA}	{GO:0005515; protein binding; molecular_function}	{XM_010685478.2; PREDICTED: Beta vulgaris subsp. vulgaris hypothetical protein (LOC104898395), mRNA}	{PF00612:IQ Calmodulin-binding motif}
transcript_HQ_BAB_transcript14541/f5p0/2036	1.0284e-19	6.6919e-19	{XP_010669670.1; PREDICTED: protein IQ-DOMAIN 1 [Beta vulgaris subsp. vulgaris]}	{sp|Q9SF32|IQD1_ARATH; Protein IQ-DOMAIN 1 OS=Arabidopsis thaliana GN=IQD1 PE=1 SV=1}	{bvg:104886840; - - - - -}	{NA}	{GO:0001772; immunological synapse; cellular_component GO:0005515; protein binding; molecular_function GO:0097197; NA GO:0016021; integral to membrane; cellular_component}	{XM_010671368.2; PREDICTED: Beta vulgaris subsp. vulgaris protein IQ-DOMAIN 1 (LOC104886840), mRNA}	{PF15050:SCIMP protein PF00612:IQ Calmodulin-binding motif}
transcript_HQ_BAB_transcript14424/f2p0/2105	1.7004e-07	5.8103e-07	{XP_010687882.1; PREDICTED: Calmodulin-binding receptor-like cytoplasmic kinase 3 [Beta vulgaris subsp. vulgaris]}	{sp|Q9ASQ5|CRCK3_ARATH; Calmodulin-binding receptor-like cytoplasmic kinase 3 OS=Arabidopsis thaliana GN=CRCK3 PE=2 SV=1}	{vvi:100250654; - - - - -}	{At2g11520; KOG1187 Serine/threonine protein kinase T Signal transduction mechanisms ;}	{GO:0005524; ATP binding; molecular_function GO:0006468; protein phosphorylation; biological_process GO:0003978; UDP-glucose 4-epimerase activity; molecular_function GO:0009103; lipopolysaccharide biosynthetic process; biological_process GO:0004672; protein kinase activity; molecular_function}	{XM_010689580.2; PREDICTED: Beta vulgaris subsp. vulgaris Calmodulin-binding receptor-like cytoplasmic kinase 3 (LOC104901949), mRNA}	{PF07714:Protein tyrosine kinase PF00069:Protein kinase domain PF08485:Polysaccharide biosynthesis protein C-terminal}
transcript_HQ_BAB_transcript13971/f2p0/2113	9.013e-295	9.474e-293	{KNA20947.1; hypothetical protein SOVF_047680 [Spinacia oleracea]}	{sp|Q9C9T2|SARD1_ARATH; Protein SAR DEFICIENT 1 OS=Arabidopsis thaliana GN=SARD1 PE=1 SV=1}	{bvg:104893586; - - - - -}	{NA}	{GO:0003676; nucleic acid binding; molecular_function GO:0006950; response to stress; biological_process GO:0005622; intracellular; cellular_component GO:0005516; Calmodulin binding; molecular_function}	{NA}	{PF00570:HRDC domain PF07887:Calmodulin binding protein-like}
transcript_HQ_BAB_transcript13648/f2p0/2140	0.00023163	0.00057663	{KNA05050.1; hypothetical protein SOVF_193970 [Spinacia oleracea]}	{sp|Q8W490|PEPK2_ARATH; Serine/threonine-protein kinase PEPKR2 OS=Arabidopsis thaliana GN=PEPKR2 PE=2 SV=1}	{nnu:104604022; - - - - -}	{At1g12680; KOG0032 Ca2+/Calmodulin-dependent protein kinase, EF-Hand protein superfamily T Signal transduction mechanisms ;}	{GO:0016773; phosphotransferase activity, alcohol group as acceptor; molecular_function GO:0016020; membrane; cellular_component GO:0005524; ATP binding; molecular_function GO:0006468; protein phosphorylation; biological_process GO:0004672; protein kinase activity; molecular_function}	{XM_010691899.2; PREDICTED: Beta vulgaris subsp. vulgaris Serine/threonine-protein kinase PEPKR2 (LOC104903792), mRNA}	{PF06293:Lipopolysaccharide kinase (Kdo/WaaP) family PF07714:Protein tyrosine kinase PF00069:Protein kinase domain}
transcript_HQ_BAB_transcript13254/f2p0/2191	1.4562e-39	1.6586e-38	{KNA18369.1; hypothetical protein SOVF_071400 [Spinacia oleracea]}	{sp|Q9LFA4|IQM3_ARATH; IQ domain-containing protein IQM3 OS=Arabidopsis thaliana GN=IQM3 PE=2 SV=1}	{jcu:105629472; - - - - -}	{NA}	{GO:0005515; protein binding; molecular_function}	{XM_010685478.2; PREDICTED: Beta vulgaris subsp. vulgaris hypothetical protein (LOC104898395), mRNA}	{PF00612:IQ Calmodulin-binding motif}
transcript_HQ_BAB_transcript1306/f6p0/4143	0.0040058	0.0083995	{XP_010669615.1; PREDICTED: BAG family molecular chaperone regulator 6 [Beta vulgaris subsp. vulgaris]}	{sp|O82345|BAG6_ARATH; BAG family molecular chaperone regulator 6 OS=Arabidopsis thaliana GN=BAG6 PE=1 SV=1}	{bvg:104886797; - - - - -}	{NA}	{GO:0005515; protein binding; molecular_function GO:0051087; chaperone binding; molecular_function}	{NA}	{PF02179:BAG domain PF00612:IQ Calmodulin-binding motif}
transcript_HQ_BAB_transcript1199/f2p0/4280	1.1637e-94	3.1441e-93	{KNA14621.1; hypothetical protein SOVF_105840 [Spinacia oleracea]}	{sp|Q9LHE9|MYO1_ARATH; Myosin-1 OS=Arabidopsis thaliana GN=VIII-1 PE=1 SV=1}	{vvi:100254832; - - - - -}	{At3g19960; KOG0160 Myosin class V heavy chain Z Cytoskeleton ;}	{GO:0003676; nucleic acid binding; molecular_function GO:0005515; protein binding; molecular_function GO:0003774; motor activity; molecular_function GO:0016301; kinase activity; molecular_function GO:0005524; ATP binding; molecular_function GO:0016459; myosin complex; cellular_component}	{XM_010690349.2; PREDICTED: Beta vulgaris subsp. vulgaris myosin-1 (LOC104902546), mRNA}	{PF00612:IQ Calmodulin-binding motif PF06414:Zeta toxin PF00063:Myosin head (motor domain) PF00270:DEAD/DEAH box helicase}
transcript_HQ_BAB_transcript11853/f4p0/2339	1.5042e-07	5.1593e-07	{XP_010696533.1; PREDICTED: IQ domain-containing protein IQM1 [Beta vulgaris subsp. vulgaris]}	{sp|O64851|IQM4_ARATH; IQ domain-containing protein IQM4 OS=Arabidopsis thaliana GN=IQM4 PE=2 SV=1}	{pper:PRUPE_ppa003777mg; - - - - -}	{NA}	{GO:0005515; protein binding; molecular_function}	{XM_010698231.2; PREDICTED: Beta vulgaris subsp. vulgaris hypothetical protein (LOC104909048), mRNA}	{PF00612:IQ Calmodulin-binding motif}
transcript_HQ_BAB_transcript10811/f5p0/2428	6.8772e-25	5.3243e-24	{XP_010678432.1; PREDICTED: uncharacterized protein LOC104893983 [Beta vulgaris subsp. vulgaris]}	{NA}	{bvg:104893983; - - - - -}	{NA}	{GO:0005516; Calmodulin binding; molecular_function}	{XM_010680130.2; PREDICTED: Beta vulgaris subsp. vulgaris hypothetical protein (LOC104893983), mRNA}	{PF07839:Plant Calmodulin-binding domain}
transcript_HQ_BAB_transcript10554/f11p0/2450	0.01174	0.022649	{XP_010672433.1; PREDICTED: protein IQ-DOMAIN 14 [Beta vulgaris subsp. vulgaris]}	{sp|Q8LPG9|IQD14_ARATH; Protein IQ-DOMAIN 14 OS=Arabidopsis thaliana GN=IQD14 PE=1 SV=1}	{bvg:104889007; - - - - -}	{NA}	{GO:0001104; RNA polymerase II transcription cofactor activity; molecular_function GO:0006357; regulation of transcription from RNA polymerase II promoter; biological_process GO:0016592; mediator complex; cellular_component GO:0005515; protein binding; molecular_function}	{XM_010674131.2; PREDICTED: Beta vulgaris subsp. vulgaris protein IQ-DOMAIN 14 (LOC104889007), transcript variant X1, mRNA}	{PF08633:Rox3 mediator complex subunit PF00612:IQ Calmodulin-binding motif}
transcript_HQ_SAB_transcript29715/f4p0/900	5.3135e-07	1.7456e-06	{XP_010671757.1; PREDICTED: calmodulin [Beta vulgaris subsp. vulgaris]}	{sp|Q2R1Z5|CML6_ORYSJ; Putative calmodulin-like protein 6 OS=Oryza sativa subsp. japonica GN=CML6 PE=3 SV=1}	{bvg:104888465; K02183 CALM calmodulin - ko04014; Environmental Information Processing; Signal transduction; Ras signaling pathway | ko04015; Environmental Information Processing; Signal transduction; Rap1 signaling pathway | ko04016; Environmental Information Processing; Signal transduction; MAPK signaling pathway - plant | ko04371; Environmental Information Processing; Signal transduction; Apel…	{At5g49480; KOG0027 Calmodulin and related proteins (EF-Hand superfamily) T Signal transduction mechanisms ;}	{GO:0005509; calcium ion binding; molecular_function GO:0003677; DNA binding; molecular_function GO:0005578; proteinaceous extracellular matrix; cellular_component GO:0006355; regulation of transcription, DNA-dependent; biological_process GO:0007165; signal transduction; biological_process}	{NA}	{PF03979:Sigma-70 factor, region 1.1 PF10591:Secreted protein acidic and rich in cysteine Ca binding region PF13405:EF-hand domain PF13499:EF-hand domain pair PF13833:EF-hand domain pair PF00036:EF hand PF13202:EF hand}
transcript_HQ_SAB_transcript28712/f2p0/988	4.7418e-11	2.0619e-10	{XP_010687927.1; PREDICTED: calmodulin-like protein 7 [Beta vulgaris subsp. vulgaris]}	{sp|Q9SRR7|CML3_ARATH; Calmodulin-like protein 3 OS=Arabidopsis thaliana GN=CML3 PE=2 SV=1}	{sind:105162129; K13448 CML calcium-binding protein CML - ko04626; Organismal Systems; Environmental adaptation; Plant-pathogen interaction}	{At3g07490; KOG0027 Calmodulin and related proteins (EF-Hand superfamily) T Signal transduction mechanisms ;}	{GO:0007165; signal transduction; biological_process GO:0005801; cis-Golgi network; cellular_component GO:0006886; intracellular protein transport; biological_process GO:0005515; protein binding; molecular_function GO:0004521; endoribonuclease activity; molecular_function GO:0005509; calcium ion binding; molecular_function GO:0000753; cell morphogenesis involved in conjugation with cellular fusio…	{XM_010243265.2; PREDICTED: Nelumbo nucifera calmodulin-like protein 3 (LOC104586129), mRNA}	{PF13202:EF hand PF10591:Secreted protein acidic and rich in cysteine Ca binding region PF04136:Sec34-like family PF00036:EF hand PF13833:EF-hand domain pair PF11080:Protein of unknown function (DUF2622) PF12763:Cytoskeletal-regulatory complex EF hand PF12351:Ca2+ regulator and membrane fusion protein Fig1 PF13405:EF-hand domain PF13499:EF-hand domain pair}
transcript_HQ_SAB_transcript24688/f2p0/1318	7.4809e-19	4.7027e-18	{XP_010672190.1; PREDICTED: calmodulin-like protein 7 [Beta vulgaris subsp. vulgaris]}	{sp|Q9LNE7|CML7_ARATH; Calmodulin-like protein 7 OS=Arabidopsis thaliana GN=CML7 PE=2 SV=1}	{bvg:104888804; K13448 CML calcium-binding protein CML - ko04626; Organismal Systems; Environmental adaptation; Plant-pathogen interaction}	{At1g05990; KOG0027 Calmodulin and related proteins (EF-Hand superfamily) T Signal transduction mechanisms ;}	{GO:0005509; calcium ion binding; molecular_function GO:0000272; polysaccharide catabolic process; biological_process GO:0004553; hydrolase activity, hydrolyzing O-glycosyl compounds; molecular_function GO:0005515; protein binding; molecular_function GO:0005578; proteinaceous extracellular matrix; cellular_component GO:0007165; signal transduction; biological_process}	{XM_010673888.2; PREDICTED: Beta vulgaris subsp. vulgaris calmodulin-like protein 7 (LOC104888804), mRNA}	{PF10591:Secreted protein acidic and rich in cysteine Ca binding region PF13202:EF hand PF00404:Dockerin type I repeat PF13499:EF-hand domain pair PF13405:EF-hand domain PF12763:Cytoskeletal-regulatory complex EF hand PF13833:EF-hand domain pair PF00036:EF hand}
transcript_HQ_SAB_transcript9420/f2p0/2377	4.4586e-06	1.3421e-05	{XP_010685966.1; PREDICTED: CBL-interacting protein kinase 2 [Beta vulgaris subsp. vulgaris]}	{sp|Q7X996|CIPK2_ORYSJ; CBL-interacting protein kinase 2 OS=Oryza sativa subsp. japonica GN=CIPK2 PE=2 SV=1}	{nnu:104594533; K07198 PRKAA, AMPK 5'-AMP-activated protein kinase, catalytic alpha subunit 2.7.11.11 ko04371; Environmental Information Processing; Signal transduction; Apelin signaling pathway | ko04068; Environmental Information Processing; Signal transduction; FoxO signaling pathway | ko04151; Environmental Information Processing; Signal transduction; PI3K-Akt signaling pathway | ko04152; Env…	{At5g58380; KOG0583 Serine/threonine protein kinase T Signal transduction mechanisms ;}	{GO:0006468; protein phosphorylation; biological_process GO:0016020; membrane; cellular_component GO:0004672; protein kinase activity; molecular_function GO:0016773; phosphotransferase activity, alcohol group as acceptor; molecular_function GO:0005524; ATP binding; molecular_function GO:0007165; signal transduction; biological_process}	{XM_010687664.1; PREDICTED: Beta vulgaris subsp. vulgaris CBL-interacting protein kinase 2 (LOC104900276), mRNA}	{PF03822:NAF domain PF07714:Protein tyrosine kinase PF00069:Protein kinase domain PF06293:Lipopolysaccharide kinase (Kdo/WaaP) family}
transcript_HQ_SAB_transcript8928/f4p0/2397	0.012173	0.02343	{XP_010685966.1; PREDICTED: CBL-interacting protein kinase 2 [Beta vulgaris subsp. vulgaris]}	{sp|Q7X996|CIPK2_ORYSJ; CBL-interacting protein kinase 2 OS=Oryza sativa subsp. japonica GN=CIPK2 PE=2 SV=1}	{nnu:104594533; K07198 PRKAA, AMPK 5'-AMP-activated protein kinase, catalytic alpha subunit 2.7.11.11 ko04371; Environmental Information Processing; Signal transduction; Apelin signaling pathway | ko04068; Environmental Information Processing; Signal transduction; FoxO signaling pathway | ko04151; Environmental Information Processing; Signal transduction; PI3K-Akt signaling pathway | ko04152; Env…	{At5g58380; KOG0583 Serine/threonine protein kinase T Signal transduction mechanisms ;}	{GO:0007165; signal transduction; biological_process GO:0005524; ATP binding; molecular_function GO:0016773; phosphotransferase activity, alcohol group as acceptor; molecular_function GO:0004672; protein kinase activity; molecular_function GO:0016020; membrane; cellular_component GO:0006468; protein phosphorylation; biological_process}	{XM_010687664.1; PREDICTED: Beta vulgaris subsp. vulgaris CBL-interacting protein kinase 2 (LOC104900276), mRNA}	{PF07714:Protein tyrosine kinase PF00069:Protein kinase domain PF03822:NAF domain PF06293:Lipopolysaccharide kinase (Kdo/WaaP) family}
transcript_HQ_SAB_transcript8562/f3p0/2399	1.0999e-22	7.9289e-22	{XP_010685966.1; PREDICTED: CBL-interacting protein kinase 2 [Beta vulgaris subsp. vulgaris]}	{sp|Q7X996|CIPK2_ORYSJ; CBL-interacting protein kinase 2 OS=Oryza sativa subsp. japonica GN=CIPK2 PE=2 SV=1}	{nnu:104594533; K07198 PRKAA, AMPK 5'-AMP-activated protein kinase, catalytic alpha subunit 2.7.11.11 ko04371; Environmental Information Processing; Signal transduction; Apelin signaling pathway | ko04068; Environmental Information Processing; Signal transduction; FoxO signaling pathway | ko04151; Environmental Information Processing; Signal transduction; PI3K-Akt signaling pathway | ko04152; Env…	{At5g58380; KOG0583 Serine/threonine protein kinase T Signal transduction mechanisms ;}	{GO:0007165; signal transduction; biological_process GO:0016773; phosphotransferase activity, alcohol group as acceptor; molecular_function GO:0005524; ATP binding; molecular_function GO:0016020; membrane; cellular_component GO:0006468; protein phosphorylation; biological_process GO:0004672; protein kinase activity; molecular_function}	{XM_010687664.1; PREDICTED: Beta vulgaris subsp. vulgaris CBL-interacting protein kinase 2 (LOC104900276), mRNA}	{PF06293:Lipopolysaccharide kinase (Kdo/WaaP) family PF07714:Protein tyrosine kinase PF00069:Protein kinase domain PF03822:NAF domain}
transcript_HQ_SAB_transcript18931/f2p0/1691	6.3709e-23	4.6335e-22	{KNA19803.1; hypothetical protein SOVF_058140 [Spinacia oleracea]}	{sp|Q9LGV5|CIPK1_ORYSJ; CBL-interacting protein kinase 1 OS=Oryza sativa subsp. japonica GN=CIPK1 PE=2 SV=1}	{aip:107635498; K07198 PRKAA, AMPK 5'-AMP-activated protein kinase, catalytic alpha subunit 2.7.11.11 ko04371; Environmental Information Processing; Signal transduction; Apelin signaling pathway | ko04068; Environmental Information Processing; Signal transduction; FoxO signaling pathway | ko04151; Environmental Information Processing; Signal transduction; PI3K-Akt signaling pathway | ko04152; Env…	{At3g17510; KOG0583 Serine/threonine protein kinase T Signal transduction mechanisms ;}	{GO:0007165; signal transduction; biological_process GO:0016773; phosphotransferase activity, alcohol group as acceptor; molecular_function GO:0005524; ATP binding; molecular_function GO:0016020; membrane; cellular_component GO:0006468; protein phosphorylation; biological_process GO:0004672; protein kinase activity; molecular_function}	{XM_010695788.2; PREDICTED: Beta vulgaris subsp. vulgaris CBL-interacting Serine/threonine-protein kinase 1 (LOC104906950), transcript variant X1, mRNA}	{PF03822:NAF domain PF00069:Protein kinase domain PF07714:Protein tyrosine kinase PF06293:Lipopolysaccharide kinase (Kdo/WaaP) family}
transcript_HQ_SAB_transcript15915/f2p0/1885	1.8156e-05	5.1463e-05	{KNA19803.1; hypothetical protein SOVF_058140 [Spinacia oleracea]}	{sp|Q9LGV5|CIPK1_ORYSJ; CBL-interacting protein kinase 1 OS=Oryza sativa subsp. japonica GN=CIPK1 PE=2 SV=1}	{aip:107635498; K07198 PRKAA, AMPK 5'-AMP-activated protein kinase, catalytic alpha subunit 2.7.11.11 ko04371; Environmental Information Processing; Signal transduction; Apelin signaling pathway | ko04068; Environmental Information Processing; Signal transduction; FoxO signaling pathway | ko04151; Environmental Information Processing; Signal transduction; PI3K-Akt signaling pathway | ko04152; Env…	{At3g17510; KOG0583 Serine/threonine protein kinase T Signal transduction mechanisms ;}	{GO:0004672; protein kinase activity; molecular_function GO:0006468; protein phosphorylation; biological_process GO:0016020; membrane; cellular_component GO:0016773; phosphotransferase activity, alcohol group as acceptor; molecular_function GO:0005524; ATP binding; molecular_function GO:0007165; signal transduction; biological_process}	{XM_010695788.2; PREDICTED: Beta vulgaris subsp. vulgaris CBL-interacting Serine/threonine-protein kinase 1 (LOC104906950), transcript variant X1, mRNA}	{PF03822:NAF domain PF00069:Protein kinase domain PF07714:Protein tyrosine kinase PF06293:Lipopolysaccharide kinase (Kdo/WaaP) family}
transcript_HQ_SAB_transcript10945/f2p0/2222	1.5185e-05	4.339e-05	{KNA07470.1; hypothetical protein SOVF_171570 [Spinacia oleracea]}	{sp|Q5W736|CIPKI_ORYSJ; CBL-interacting protein kinase 18 OS=Oryza sativa subsp. japonica GN=CIPK18 PE=2 SV=1}	{egu:105045953; - - - - -}	{At5g58380; KOG0583 Serine/threonine protein kinase T Signal transduction mechanisms ;}	{GO:0004672; protein kinase activity; molecular_function GO:0006468; protein phosphorylation; biological_process GO:0016020; membrane; cellular_component GO:0016773; phosphotransferase activity, alcohol group as acceptor; molecular_function GO:0005524; ATP binding; molecular_function GO:0007165; signal transduction; biological_process}	{XM_010685239.2; PREDICTED: Beta vulgaris subsp. vulgaris CBL-interacting protein kinase 18 (LOC104898198), mRNA}	{PF07714:Protein tyrosine kinase PF00069:Protein kinase domain PF03822:NAF domain PF06293:Lipopolysaccharide kinase (Kdo/WaaP) family}
transcript_HQ_SAB_transcript10911/f2p0/2296	7.659e-11	3.297e-10	{KNA21033.1; hypothetical protein SOVF_046930 [Spinacia oleracea]}	{sp|Q7X996|CIPK2_ORYSJ; CBL-interacting protein kinase 2 OS=Oryza sativa subsp. japonica GN=CIPK2 PE=2 SV=1}	{bvg:104908436; - - - - -}	{At5g58380; KOG0583 Serine/threonine protein kinase T Signal transduction mechanisms ;}	{GO:0006468; protein phosphorylation; biological_process GO:0004672; protein kinase activity; molecular_function GO:0005524; ATP binding; molecular_function GO:0007165; signal transduction; biological_process}	{XM_010697553.2; PREDICTED: Beta vulgaris subsp. vulgaris CBL-interacting protein kinase 18 (LOC104908436), mRNA}	{PF03822:NAF domain PF00069:Protein kinase domain PF07714:Protein tyrosine kinase}
transcript_HQ_BAB_transcript9542/f2p0/2624	1.2836e-97	3.6065e-96	{XP_010685966.1; PREDICTED: CBL-interacting protein kinase 2 [Beta vulgaris subsp. vulgaris]}	{sp|Q7X996|CIPK2_ORYSJ; CBL-interacting protein kinase 2 OS=Oryza sativa subsp. japonica GN=CIPK2 PE=2 SV=1}	{nnu:104594533; K07198 PRKAA, AMPK 5'-AMP-activated protein kinase, catalytic alpha subunit 2.7.11.11 ko04371; Environmental Information Processing; Signal transduction; Apelin signaling pathway | ko04068; Environmental Information Processing; Signal transduction; FoxO signaling pathway | ko04151; Environmental Information Processing; Signal transduction; PI3K-Akt signaling pathway | ko04152; Env…	{At5g58380; KOG0583 Serine/threonine protein kinase T Signal transduction mechanisms ;}	{GO:0007165; signal transduction; biological_process GO:0016773; phosphotransferase activity, alcohol group as acceptor; molecular_function GO:0006468; protein phosphorylation; biological_process GO:0016020; membrane; cellular_component GO:0005524; ATP binding; molecular_function GO:0004672; protein kinase activity; molecular_function}	{XM_010687664.1; PREDICTED: Beta vulgaris subsp. vulgaris CBL-interacting protein kinase 2 (LOC104900276), mRNA}	{PF03822:NAF domain PF00069:Protein kinase domain PF07714:Protein tyrosine kinase PF06293:Lipopolysaccharide kinase (Kdo/WaaP) family}
transcript_HQ_BAB_transcript17946/f2p0/1669	1.9936e-10	8.3343e-10	{KNA19803.1; hypothetical protein SOVF_058140 [Spinacia oleracea]}	{sp|Q9LGV5|CIPK1_ORYSJ; CBL-interacting protein kinase 1 OS=Oryza sativa subsp. japonica GN=CIPK1 PE=2 SV=1}	{aip:107635498; K07198 PRKAA, AMPK 5'-AMP-activated protein kinase, catalytic alpha subunit 2.7.11.11 ko04371; Environmental Information Processing; Signal transduction; Apelin signaling pathway | ko04068; Environmental Information Processing; Signal transduction; FoxO signaling pathway | ko04151; Environmental Information Processing; Signal transduction; PI3K-Akt signaling pathway | ko04152; Env…	{At3g17510; KOG0583 Serine/threonine protein kinase T Signal transduction mechanisms ;}	{GO:0016773; phosphotransferase activity, alcohol group as acceptor; molecular_function GO:0005524; ATP binding; molecular_function GO:0016020; membrane; cellular_component GO:0006468; protein phosphorylation; biological_process GO:0004672; protein kinase activity; molecular_function GO:0007165; signal transduction; biological_process}	{XM_010695788.2; PREDICTED: Beta vulgaris subsp. vulgaris CBL-interacting Serine/threonine-protein kinase 1 (LOC104906950), transcript variant X1, mRNA}	{PF07714:Protein tyrosine kinase PF00069:Protein kinase domain PF03822:NAF domain PF06293:Lipopolysaccharide kinase (Kdo/WaaP) family}
transcript_HQ_BAB_transcript14044/f10p0/2034	2.645e-45	3.3828e-44	{KNA21033.1; hypothetical protein SOVF_046930 [Spinacia oleracea]}	{sp|Q7X996|CIPK2_ORYSJ; CBL-interacting protein kinase 2 OS=Oryza sativa subsp. japonica GN=CIPK2 PE=2 SV=1}	{bvg:104908436; - - - - -}	{At5g58380; KOG0583 Serine/threonine protein kinase T Signal transduction mechanisms ;}	{GO:0016020; membrane; cellular_component GO:0016773; phosphotransferase activity, alcohol group as acceptor; molecular_function GO:0005524; ATP binding; molecular_function GO:0006468; protein phosphorylation; biological_process GO:0004672; protein kinase activity; molecular_function GO:0007165; signal transduction; biological_process}	{XM_010697553.2; PREDICTED: Beta vulgaris subsp. vulgaris CBL-interacting protein kinase 18 (LOC104908436), mRNA}	{PF06293:Lipopolysaccharide kinase (Kdo/WaaP) family PF07714:Protein tyrosine kinase PF00069:Protein kinase domain PF03822:NAF domain}
transcript_HQ_SAB_transcript8868/f4p0/2392	1.3224e-90	3.3907e-89	{KNA19787.1; hypothetical protein SOVF_058300 [Spinacia oleracea]}	{sp|Q9C6P3|CDPKX_ARATH; calcium-dependent protein kinase 33 OS=Arabidopsis thaliana GN=CPK33 PE=1 SV=1}	{bvg:104891685; K13412 CPK calcium-dependent protein kinase 2.7.11.1 ko04626; Organismal Systems; Environmental adaptation; Plant-pathogen interaction | ko05145; Human Diseases; Infectious diseases: Parasitic; Toxoplasmosis}	{At1g50700; KOG0032 Ca2+/calmodulin-dependent protein kinase, EF-Hand protein superfamily T Signal transduction mechanisms ;}	{GO:0016773; phosphotransferase activity, alcohol group as acceptor; molecular_function GO:0005524; ATP binding; molecular_function GO:0004812; aminoacyl-tRNA ligase activity; molecular_function GO:0006418; tRNA aminoacylation for protein translation; biological_process GO:0005578; proteinaceous extracellular matrix; cellular_component GO:0004672; protein kinase activity; molecular_function GO:00…	{XM_010677414.2; PREDICTED: Beta vulgaris subsp. vulgaris calcium-dependent protein kinase 33 (LOC104891685), mRNA}	{PF13405:EF-hand domain PF13499:EF-hand domain pair PF00036:EF hand PF13833:EF-hand domain pair PF07714:Protein tyrosine kinase PF00069:Protein kinase domain PF12763:Cytoskeletal-regulatory complex EF hand PF10591:Secreted protein acidic and rich in cysteine Ca binding region PF04558:Glutaminyl-tRNA synthetase, non-specific RNA binding region part 1 PF01979:Amidohydrolase family PF13202:EF hand P…
transcript_HQ_SAB_transcript8320/f2p0/2482	1.3039e-16	7.4779e-16	{XP_010690560.1; PREDICTED: calcium-dependent protein kinase 26 [Beta vulgaris subsp. vulgaris]}	{sp|Q38871|CDPK5_ARATH; calcium-dependent protein kinase 5 OS=Arabidopsis thaliana GN=CPK5 PE=2 SV=1}	{jcu:105635427; K13412 CPK calcium-dependent protein kinase 2.7.11.1 ko04626; Organismal Systems; Environmental adaptation; Plant-pathogen interaction | ko05145; Human Diseases; Infectious diseases: Parasitic; Toxoplasmosis}	{At4g35310; KOG0032 Ca2+/calmodulin-dependent protein kinase, EF-Hand protein superfamily T Signal transduction mechanisms ;}	{GO:0004672; protein kinase activity; molecular_function GO:0000166; nucleotide binding; molecular_function GO:0016020; membrane; cellular_component GO:0004812; aminoacyl-tRNA ligase activity; molecular_function GO:0006418; tRNA aminoacylation for protein translation; biological_process GO:0016773; phosphotransferase activity, alcohol group as acceptor; molecular_function GO:0005524; ATP binding;…	{XM_010692258.2; PREDICTED: Beta vulgaris subsp. vulgaris calcium-dependent protein kinase 26 (LOC104904078), mRNA}	{PF06293:Lipopolysaccharide kinase (Kdo/WaaP) family PF13202:EF hand PF04558:Glutaminyl-tRNA synthetase, non-specific RNA binding region part 1 PF10591:Secreted protein acidic and rich in cysteine Ca binding region PF12763:Cytoskeletal-regulatory complex EF hand PF07714:Protein tyrosine kinase PF13833:EF-hand domain pair PF00069:Protein kinase domain PF00036:EF hand PF13499:EF-hand domain pair PF…
transcript_HQ_SAB_transcript7717/f2p0/2532	3.8195e-08	1.3701e-07	{XP_010690560.1; PREDICTED: calcium-dependent protein kinase 26 [Beta vulgaris subsp. vulgaris]}	{sp|Q38871|CDPK5_ARATH; calcium-dependent protein kinase 5 OS=Arabidopsis thaliana GN=CPK5 PE=2 SV=1}	{jcu:105635427; K13412 CPK calcium-dependent protein kinase 2.7.11.1 ko04626; Organismal Systems; Environmental adaptation; Plant-pathogen interaction | ko05145; Human Diseases; Infectious diseases: Parasitic; Toxoplasmosis}	{At4g35310; KOG0032 Ca2+/calmodulin-dependent protein kinase, EF-Hand protein superfamily T Signal transduction mechanisms ;}	{GO:0000166; nucleotide binding; molecular_function GO:0016020; membrane; cellular_component GO:0004672; protein kinase activity; molecular_function GO:0005578; proteinaceous extracellular matrix; cellular_component GO:0016773; phosphotransferase activity, alcohol group as acceptor; molecular_function GO:0005524; ATP binding; molecular_function GO:0006418; tRNA aminoacylation for protein translat…	{XM_010692258.2; PREDICTED: Beta vulgaris subsp. vulgaris calcium-dependent protein kinase 26 (LOC104904078), mRNA}	{PF12763:Cytoskeletal-regulatory complex EF hand PF00036:EF hand PF13833:EF-hand domain pair PF07714:Protein tyrosine kinase PF00069:Protein kinase domain PF13499:EF-hand domain pair PF13405:EF-hand domain PF13202:EF hand PF04558:Glutaminyl-tRNA synthetase, non-specific RNA binding region part 1 PF10591:Secreted protein acidic and rich in cysteine Ca binding region PF06293:Lipopolysaccharide kina…
transcript_HQ_SAB_transcript4409/f7p0/2948	0.0016876	0.0037453	{XP_010694387.1; PREDICTED: calcium-dependent protein kinase 1 [Beta vulgaris subsp. vulgaris]}	{sp|Q06850|CDPK1_ARATH; calcium-dependent protein kinase 1 OS=Arabidopsis thaliana GN=CPK1 PE=1 SV=1}	{vvi:100249224; K13412 CPK calcium-dependent protein kinase 2.7.11.1 ko04626; Organismal Systems; Environmental adaptation; Plant-pathogen interaction | ko05145; Human Diseases; Infectious diseases: Parasitic; Toxoplasmosis}	{At5g04870; KOG0032 Ca2+/calmodulin-dependent protein kinase, EF-Hand protein superfamily T Signal transduction mechanisms ;}	{GO:0005737; cytoplasm; cellular_component GO:0005509; calcium ion binding; molecular_function GO:0006468; protein phosphorylation; biological_process GO:0007165; signal transduction; biological_process GO:0005515; protein binding; molecular_function GO:0004672; protein kinase activity; molecular_function GO:0019058; viral infectious cycle; biological_process GO:0000166; nucleotide binding; molec…	{XM_010696085.2; PREDICTED: Beta vulgaris subsp. vulgaris calcium-dependent protein kinase 1 (LOC104907192), mRNA}	{PF06293:Lipopolysaccharide kinase (Kdo/WaaP) family PF04558:Glutaminyl-tRNA synthetase, non-specific RNA binding region part 1 PF10591:Secreted protein acidic and rich in cysteine Ca binding region PF13202:EF hand PF13499:EF-hand domain pair PF13405:EF-hand domain PF12763:Cytoskeletal-regulatory complex EF hand PF05109:Herpes virus major outer envelope glycoprotein (BLLF1) PF07714:Protein tyrosi…
transcript_HQ_SAB_transcript3148/f2p0/3287	0.00011169	0.00028915	{XP_010679935.1; PREDICTED: calcium-dependent protein kinase 18 [Beta vulgaris subsp. vulgaris]}	{sp|Q9FKW4|CDPKS_ARATH; calcium-dependent protein kinase 28 OS=Arabidopsis thaliana GN=CPK28 PE=1 SV=1}	{pper:PRUPE_ppa003676mg; K13412 CPK calcium-dependent protein kinase 2.7.11.1 ko04626; Organismal Systems; Environmental adaptation; Plant-pathogen interaction | ko05145; Human Diseases; Infectious diseases: Parasitic; Toxoplasmosis}	{At5g66210; KOG0032 Ca2+/calmodulin-dependent protein kinase, EF-Hand protein superfamily T Signal transduction mechanisms ;}	{GO:0016020; membrane; cellular_component GO:0004672; protein kinase activity; molecular_function GO:0005578; proteinaceous extracellular matrix; cellular_component GO:0016773; phosphotransferase activity, alcohol group as acceptor; molecular_function GO:0005524; ATP binding; molecular_function GO:0006468; protein phosphorylation; biological_process GO:0005509; calcium ion binding; molecular_func…	{XM_010681633.2; PREDICTED: Beta vulgaris subsp. vulgaris calcium-dependent protein kinase 18 (LOC104895194), mRNA}	{PF13202:EF hand PF10591:Secreted protein acidic and rich in cysteine Ca binding region PF06293:Lipopolysaccharide kinase (Kdo/WaaP) family PF00036:EF hand PF13833:EF-hand domain pair PF00069:Protein kinase domain PF07714:Protein tyrosine kinase PF12763:Cytoskeletal-regulatory complex EF hand PF13405:EF-hand domain PF13499:EF-hand domain pair}
transcript_HQ_SAB_transcript2536/f2p0/3406	4.7121e-05	0.00012752	{XP_010694387.1; PREDICTED: calcium-dependent protein kinase 1 [Beta vulgaris subsp. vulgaris]}	{sp|Q06850|CDPK1_ARATH; calcium-dependent protein kinase 1 OS=Arabidopsis thaliana GN=CPK1 PE=1 SV=1}	{vvi:100249224; K13412 CPK calcium-dependent protein kinase 2.7.11.1 ko04626; Organismal Systems; Environmental adaptation; Plant-pathogen interaction | ko05145; Human Diseases; Infectious diseases: Parasitic; Toxoplasmosis}	{At5g04870; KOG0032 Ca2+/calmodulin-dependent protein kinase, EF-Hand protein superfamily T Signal transduction mechanisms ;}	{GO:0016773; phosphotransferase activity, alcohol group as acceptor; molecular_function GO:0005524; ATP binding; molecular_function GO:0004672; protein kinase activity; molecular_function GO:0006468; protein phosphorylation; biological_process GO:0016020; membrane; cellular_component}	{XM_010696085.2; PREDICTED: Beta vulgaris subsp. vulgaris calcium-dependent protein kinase 1 (LOC104907192), mRNA}	{PF06293:Lipopolysaccharide kinase (Kdo/WaaP) family PF00069:Protein kinase domain PF07714:Protein tyrosine kinase}
transcript_HQ_SAB_transcript23448/f2p0/1398	0.015891	0.02993	{KNA21138.1; hypothetical protein SOVF_046030 [Spinacia oleracea]}	{sp|Q6I587|CDPKF_ORYSJ; calcium-dependent protein kinase 15 OS=Oryza sativa subsp. japonica GN=CPK15 PE=2 SV=1}	{bvg:104892220; K13412 CPK calcium-dependent protein kinase 2.7.11.1 ko04626; Organismal Systems; Environmental adaptation; Plant-pathogen interaction | ko05145; Human Diseases; Infectious diseases: Parasitic; Toxoplasmosis}	{At4g23650; KOG0032 Ca2+/calmodulin-dependent protein kinase, EF-Hand protein superfamily T Signal transduction mechanisms ;}	{GO:0005509; calcium ion binding; molecular_function}	{XM_010678085.2; PREDICTED: Beta vulgaris subsp. vulgaris calcium-dependent protein kinase 1 (LOC104892220), mRNA}	{PF13202:EF hand PF13833:EF-hand domain pair PF00036:EF hand PF13499:EF-hand domain pair PF13405:EF-hand domain}
transcript_HQ_SAB_transcript14019/f12p0/1957	1.8029e-15	9.8531e-15	{XP_010676387.1; PREDICTED: calcium-dependent protein kinase 1 [Beta vulgaris subsp. vulgaris]}	{sp|A2ZVI7|CDPK1_ORYSJ; calcium-dependent protein kinase 1 OS=Oryza sativa subsp. japonica GN=CPK1 PE=2 SV=1}	{bvg:104892220; K13412 CPK calcium-dependent protein kinase 2.7.11.1 ko04626; Organismal Systems; Environmental adaptation; Plant-pathogen interaction | ko05145; Human Diseases; Infectious diseases: Parasitic; Toxoplasmosis}	{At4g23650; KOG0032 Ca2+/calmodulin-dependent protein kinase, EF-Hand protein superfamily T Signal transduction mechanisms ;}	{GO:0005509; calcium ion binding; molecular_function GO:0006468; protein phosphorylation; biological_process GO:0005515; protein binding; molecular_function GO:0007165; signal transduction; biological_process GO:0008289; lipid binding; molecular_function GO:0016020; membrane; cellular_component GO:0004672; protein kinase activity; molecular_function GO:0005578; proteinaceous extracellular matrix;…	{XM_010678085.2; PREDICTED: Beta vulgaris subsp. vulgaris calcium-dependent protein kinase 1 (LOC104892220), mRNA}	{PF10591:Secreted protein acidic and rich in cysteine Ca binding region PF13202:EF hand PF06293:Lipopolysaccharide kinase (Kdo/WaaP) family PF13499:EF-hand domain pair PF13405:EF-hand domain PF12763:Cytoskeletal-regulatory complex EF hand PF00036:EF hand PF13833:EF-hand domain pair PF07714:Protein tyrosine kinase PF00069:Protein kinase domain PF05823:Nematode fatty acid retinoid binding protein (…
transcript_HQ_SAB_transcript11347/f2p0/2183	0.027311	0.049008	{KNA19022.1; hypothetical protein SOVF_065500 [Spinacia oleracea]}	{sp|Q8W4I7|CDPKD_ARATH; calcium-dependent protein kinase 13 OS=Arabidopsis thaliana GN=CPK13 PE=1 SV=2}	{bvg:104892495; K13412 CPK calcium-dependent protein kinase 2.7.11.1 ko04626; Organismal Systems; Environmental adaptation; Plant-pathogen interaction | ko05145; Human Diseases; Infectious diseases: Parasitic; Toxoplasmosis}	{At3g51850; KOG0032 Ca2+/calmodulin-dependent protein kinase, EF-Hand protein superfamily T Signal transduction mechanisms ;}	{GO:0016773; phosphotransferase activity, alcohol group as acceptor; molecular_function GO:0005524; ATP binding; molecular_function GO:0005578; proteinaceous extracellular matrix; cellular_component GO:0004672; protein kinase activity; molecular_function GO:0016020; membrane; cellular_component GO:0007165; signal transduction; biological_process GO:0005515; protein binding; molecular_function GO:…	{XM_010678446.2; PREDICTED: Beta vulgaris subsp. vulgaris calcium-dependent protein kinase 13 (LOC104892495), mRNA}	{PF12763:Cytoskeletal-regulatory complex EF hand PF07714:Protein tyrosine kinase PF13833:EF-hand domain pair PF00069:Protein kinase domain PF00036:EF hand PF13499:EF-hand domain pair PF13405:EF-hand domain PF06293:Lipopolysaccharide kinase (Kdo/WaaP) family PF13202:EF hand PF10591:Secreted protein acidic and rich in cysteine Ca binding region}
transcript_HQ_BAB_transcript9988/f2p0/2566	3.6455e-29	3.1906e-28	{KNA19787.1; hypothetical protein SOVF_058300 [Spinacia oleracea]}	{sp|Q9C6P3|CDPKX_ARATH; calcium-dependent protein kinase 33 OS=Arabidopsis thaliana GN=CPK33 PE=1 SV=1}	{bvg:104891685; K13412 CPK calcium-dependent protein kinase 2.7.11.1 ko04626; Organismal Systems; Environmental adaptation; Plant-pathogen interaction | ko05145; Human Diseases; Infectious diseases: Parasitic; Toxoplasmosis}	{At1g50700; KOG0032 Ca2+/calmodulin-dependent protein kinase, EF-Hand protein superfamily T Signal transduction mechanisms ;}	{GO:0004812; aminoacyl-tRNA ligase activity; molecular_function GO:0004672; protein kinase activity; molecular_function GO:0016020; membrane; cellular_component GO:0005524; ATP binding; molecular_function GO:0016787; hydrolase activity; molecular_function GO:0005515; protein binding; molecular_function GO:0005737; cytoplasm; cellular_component GO:0016773; phosphotransferase activity, alcohol grou…	{XM_010677414.2; PREDICTED: Beta vulgaris subsp. vulgaris calcium-dependent protein kinase 33 (LOC104891685), mRNA}	{PF12763:Cytoskeletal-regulatory complex EF hand PF00069:Protein kinase domain PF13833:EF-hand domain pair PF13202:EF hand PF07714:Protein tyrosine kinase PF10591:Secreted protein acidic and rich in cysteine Ca binding region PF04558:Glutaminyl-tRNA synthetase, non-specific RNA binding region part 1 PF13499:EF-hand domain pair PF13405:EF-hand domain PF01979:Amidohydrolase family PF06293:Lipopolys…
transcript_HQ_BAB_transcript9807/f2p0/2614	7.9964e-11	3.4395e-10	{KNA09827.1; hypothetical protein SOVF_149980 [Spinacia oleracea]}	{sp|Q9FKW4|CDPKS_ARATH; calcium-dependent protein kinase 28 OS=Arabidopsis thaliana GN=CPK28 PE=1 SV=1}	{cann:107859878; - - - - -}	{At5g66210; KOG0032 Ca2+/calmodulin-dependent protein kinase, EF-Hand protein superfamily T Signal transduction mechanisms ;}	{GO:0006357; regulation of transcription from RNA polymerase II promoter; biological_process GO:0016592; mediator complex; cellular_component GO:0001104; RNA polymerase II transcription cofactor activity; molecular_function GO:0016773; phosphotransferase activity, alcohol group as acceptor; molecular_function GO:0006468; protein phosphorylation; biological_process GO:0005524; ATP binding; molecul…	{XM_010681633.2; PREDICTED: Beta vulgaris subsp. vulgaris calcium-dependent protein kinase 18 (LOC104895194), mRNA}	{PF11593:Mediator complex subunit 3 fungal PF06293:Lipopolysaccharide kinase (Kdo/WaaP) family PF00069:Protein kinase domain PF07714:Protein tyrosine kinase}
transcript_HQ_BAB_transcript9481/f3p0/2741	4.0361e-07	1.3379e-06	{XP_010667055.1; PREDICTED: calcium-dependent protein kinase 8 [Beta vulgaris subsp. vulgaris]}	{sp|Q6NLQ6|CDPKW_ARATH; calcium-dependent protein kinase 32 OS=Arabidopsis thaliana GN=CPK32 PE=1 SV=1}	{lang:109340855; K13412 CPK calcium-dependent protein kinase 2.7.11.1 ko04626; Organismal Systems; Environmental adaptation; Plant-pathogen interaction | ko05145; Human Diseases; Infectious diseases: Parasitic; Toxoplasmosis; lang:109340855; - - - - -}	{At3g57530; KOG0032 Ca2+/calmodulin-dependent protein kinase, EF-Hand protein superfamily T Signal transduction mechanisms ;}	{GO:0016020; membrane; cellular_component GO:0005524; ATP binding; molecular_function GO:0004672; protein kinase activity; molecular_function GO:0005515; protein binding; molecular_function GO:0006468; protein phosphorylation; biological_process GO:0016773; phosphotransferase activity, alcohol group as acceptor; molecular_function GO:0005509; calcium ion binding; molecular_function GO:0005578; pr…	{JQ994335.1; Chenopodium album calcium dependent protein kinase 3 (CPK3) mRNA, complete cds}	{PF13405:EF-hand domain PF06293:Lipopolysaccharide kinase (Kdo/WaaP) family PF00036:EF hand PF13833:EF-hand domain pair PF07714:Protein tyrosine kinase PF13202:EF hand PF12763:Cytoskeletal-regulatory complex EF hand PF00069:Protein kinase domain PF13499:EF-hand domain pair PF10591:Secreted protein acidic and rich in cysteine Ca binding region}
transcript_HQ_BAB_transcript7451/f2p0/2918	3.1176e-31	2.8865e-30	{XP_010694387.1; PREDICTED: calcium-dependent protein kinase 1 [Beta vulgaris subsp. vulgaris]}	{sp|Q06850|CDPK1_ARATH; calcium-dependent protein kinase 1 OS=Arabidopsis thaliana GN=CPK1 PE=1 SV=1}	{vvi:100249224; K13412 CPK calcium-dependent protein kinase 2.7.11.1 ko04626; Organismal Systems; Environmental adaptation; Plant-pathogen interaction | ko05145; Human Diseases; Infectious diseases: Parasitic; Toxoplasmosis}	{At5g04870; KOG0032 Ca2+/calmodulin-dependent protein kinase, EF-Hand protein superfamily T Signal transduction mechanisms ;}	{GO:0007165; signal transduction; biological_process GO:0006418; tRNA aminoacylation for protein translation; biological_process GO:0005578; proteinaceous extracellular matrix; cellular_component GO:0019058; viral infectious cycle; biological_process GO:0019031; viral envelope; cellular_component GO:0006468; protein phosphorylation; biological_process GO:0000166; nucleotide binding; molecular_fun…	{XM_010696085.2; PREDICTED: Beta vulgaris subsp. vulgaris calcium-dependent protein kinase 1 (LOC104907192), mRNA}	{PF00069:Protein kinase domain PF12763:Cytoskeletal-regulatory complex EF hand PF05109:Herpes virus major outer envelope glycoprotein (BLLF1) PF07714:Protein tyrosine kinase PF13202:EF hand PF13833:EF-hand domain pair PF10591:Secreted protein acidic and rich in cysteine Ca binding region PF13499:EF-hand domain pair PF04558:Glutaminyl-tRNA synthetase, non-specific RNA binding region part 1 PF13405…
transcript_HQ_BAB_transcript6024/f2p0/3115	4.1132e-24	3.1104e-23	{XP_010679935.1; PREDICTED: calcium-dependent protein kinase 18 [Beta vulgaris subsp. vulgaris]}	{sp|Q9FKW4|CDPKS_ARATH; calcium-dependent protein kinase 28 OS=Arabidopsis thaliana GN=CPK28 PE=1 SV=1}	{jcu:105629011; K13412 CPK calcium-dependent protein kinase 2.7.11.1 ko04626; Organismal Systems; Environmental adaptation; Plant-pathogen interaction | ko05145; Human Diseases; Infectious diseases: Parasitic; Toxoplasmosis}	{At5g66210; KOG0032 Ca2+/calmodulin-dependent protein kinase, EF-Hand protein superfamily T Signal transduction mechanisms ;}	{GO:0005509; calcium ion binding; molecular_function GO:0006468; protein phosphorylation; biological_process GO:0016773; phosphotransferase activity, alcohol group as acceptor; molecular_function GO:0005578; proteinaceous extracellular matrix; cellular_component GO:0007165; signal transduction; biological_process GO:0005524; ATP binding; molecular_function GO:0016020; membrane; cellular_component…	{XM_010681633.2; PREDICTED: Beta vulgaris subsp. vulgaris calcium-dependent protein kinase 18 (LOC104895194), mRNA}	{PF10591:Secreted protein acidic and rich in cysteine Ca binding region PF13499:EF-hand domain pair PF12763:Cytoskeletal-regulatory complex EF hand PF00069:Protein kinase domain PF13833:EF-hand domain pair PF13202:EF hand PF07714:Protein tyrosine kinase PF06293:Lipopolysaccharide kinase (Kdo/WaaP) family PF00036:EF hand PF13405:EF-hand domain}
transcript_HQ_BAB_transcript3757/f3p0/3530	3.5541e-45	4.5345e-44	{XP_010679935.1; PREDICTED: calcium-dependent protein kinase 18 [Beta vulgaris subsp. vulgaris]}	{sp|Q9FKW4|CDPKS_ARATH; calcium-dependent protein kinase 28 OS=Arabidopsis thaliana GN=CPK28 PE=1 SV=1}	{pper:PRUPE_ppa003676mg; K13412 CPK calcium-dependent protein kinase 2.7.11.1 ko04626; Organismal Systems; Environmental adaptation; Plant-pathogen interaction | ko05145; Human Diseases; Infectious diseases: Parasitic; Toxoplasmosis}	{At5g66210; KOG0032 Ca2+/calmodulin-dependent protein kinase, EF-Hand protein superfamily T Signal transduction mechanisms ;}	{GO:0016020; membrane; cellular_component GO:0005524; ATP binding; molecular_function GO:0004672; protein kinase activity; molecular_function GO:0005515; protein binding; molecular_function GO:0005509; calcium ion binding; molecular_function GO:0006468; protein phosphorylation; biological_process GO:0016773; phosphotransferase activity, alcohol group as acceptor; molecular_function GO:0007165; si…	{XM_010681633.2; PREDICTED: Beta vulgaris subsp. vulgaris calcium-dependent protein kinase 18 (LOC104895194), mRNA}	{PF13405:EF-hand domain PF06293:Lipopolysaccharide kinase (Kdo/WaaP) family PF00036:EF hand PF13833:EF-hand domain pair PF07714:Protein tyrosine kinase PF13202:EF hand PF12763:Cytoskeletal-regulatory complex EF hand PF00069:Protein kinase domain PF13499:EF-hand domain pair PF10591:Secreted protein acidic and rich in cysteine Ca binding region}
transcript_HQ_BAB_transcript17306/f2p0/1749	5.1064e-16	2.8527e-15	{XP_010694387.1; PREDICTED: calcium-dependent protein kinase 1 [Beta vulgaris subsp. vulgaris]}	{sp|Q06850|CDPK1_ARATH; calcium-dependent protein kinase 1 OS=Arabidopsis thaliana GN=CPK1 PE=1 SV=1}	{vvi:100249224; K13412 CPK calcium-dependent protein kinase 2.7.11.1 ko04626; Organismal Systems; Environmental adaptation; Plant-pathogen interaction | ko05145; Human Diseases; Infectious diseases: Parasitic; Toxoplasmosis}	{At5g04870; KOG0032 Ca2+/calmodulin-dependent protein kinase, EF-Hand protein superfamily T Signal transduction mechanisms ;}	{GO:0004812; aminoacyl-tRNA ligase activity; molecular_function GO:0004672; protein kinase activity; molecular_function GO:0016020; membrane; cellular_component GO:0005524; ATP binding; molecular_function GO:0005515; protein binding; molecular_function GO:0005737; cytoplasm; cellular_component GO:0000166; nucleotide binding; molecular_function GO:0016773; phosphotransferase activity, alcohol grou…	{XM_010696085.2; PREDICTED: Beta vulgaris subsp. vulgaris calcium-dependent protein kinase 1 (LOC104907192), mRNA}	{PF10591:Secreted protein acidic and rich in cysteine Ca binding region PF13499:EF-hand domain pair PF04558:Glutaminyl-tRNA synthetase, non-specific RNA binding region part 1 PF00069:Protein kinase domain PF12763:Cytoskeletal-regulatory complex EF hand PF07714:Protein tyrosine kinase PF13202:EF hand PF13833:EF-hand domain pair PF00036:EF hand PF06293:Lipopolysaccharide kinase (Kdo/WaaP) family PF…
transcript_HQ_BAB_transcript13249/f2p0/2192	1.1358e-19	7.3658e-19	{XP_010678309.1; PREDICTED: calcium-dependent protein kinase 11 [Beta vulgaris subsp. vulgaris]}	{sp|Q38869|CDPK4_ARATH; calcium-dependent protein kinase 4 OS=Arabidopsis thaliana GN=CPK4 PE=1 SV=1}	{bvg:104893863; K13412 CPK calcium-dependent protein kinase 2.7.11.1 ko04626; Organismal Systems; Environmental adaptation; Plant-pathogen interaction | ko05145; Human Diseases; Infectious diseases: Parasitic; Toxoplasmosis}	{At4g09570; KOG0032 Ca2+/calmodulin-dependent protein kinase, EF-Hand protein superfamily T Signal transduction mechanisms ;}	{GO:0005737; cytoplasm; cellular_component GO:0005515; protein binding; molecular_function GO:0005524; ATP binding; molecular_function GO:0016020; membrane; cellular_component GO:0004812; aminoacyl-tRNA ligase activity; molecular_function GO:0004672; protein kinase activity; molecular_function GO:0006418; tRNA aminoacylation for protein translation; biological_process GO:0005578; proteinaceous ex…	{XM_010680007.2; PREDICTED: Beta vulgaris subsp. vulgaris calcium-dependent protein kinase 11 (LOC104893863), mRNA}	{PF13405:EF-hand domain PF00036:EF hand PF06293:Lipopolysaccharide kinase (Kdo/WaaP) family PF00069:Protein kinase domain PF12763:Cytoskeletal-regulatory complex EF hand PF07714:Protein tyrosine kinase PF13202:EF hand PF13833:EF-hand domain pair PF10591:Secreted protein acidic and rich in cysteine Ca binding region PF13499:EF-hand domain pair PF04558:Glutaminyl-tRNA synthetase, non-specific RNA b…
transcript_HQ_BAB_transcript12877/f2p0/2275	0	0	{KNA19787.1; hypothetical protein SOVF_058300 [Spinacia oleracea]}	{sp|Q9C6P3|CDPKX_ARATH; calcium-dependent protein kinase 33 OS=Arabidopsis thaliana GN=CPK33 PE=1 SV=1}	{bvg:104891685; K13412 CPK calcium-dependent protein kinase 2.7.11.1 ko04626; Organismal Systems; Environmental adaptation; Plant-pathogen interaction | ko05145; Human Diseases; Infectious diseases: Parasitic; Toxoplasmosis}	{At1g50700; KOG0032 Ca2+/calmodulin-dependent protein kinase, EF-Hand protein superfamily T Signal transduction mechanisms ;}	{GO:0016773; phosphotransferase activity, alcohol group as acceptor; molecular_function GO:0000166; nucleotide binding; molecular_function GO:0006468; protein phosphorylation; biological_process GO:0005509; calcium ion binding; molecular_function GO:0006418; tRNA aminoacylation for protein translation; biological_process GO:0005578; proteinaceous extracellular matrix; cellular_component GO:000716…	{XM_010677414.2; PREDICTED: Beta vulgaris subsp. vulgaris calcium-dependent protein kinase 33 (LOC104891685), mRNA}	{PF00036:EF hand PF06293:Lipopolysaccharide kinase (Kdo/WaaP) family PF01979:Amidohydrolase family PF13405:EF-hand domain PF13499:EF-hand domain pair PF04558:Glutaminyl-tRNA synthetase, non-specific RNA binding region part 1 PF10591:Secreted protein acidic and rich in cysteine Ca binding region PF13202:EF hand PF07714:Protein tyrosine kinase PF13833:EF-hand domain pair PF00069:Protein kinase doma…
transcript_HQ_BAB_transcript12401/f2p0/2287	0	0	{KNA19787.1; hypothetical protein SOVF_058300 [Spinacia oleracea]}	{sp|Q9C6P3|CDPKX_ARATH; calcium-dependent protein kinase 33 OS=Arabidopsis thaliana GN=CPK33 PE=1 SV=1}	{bvg:104891685; K13412 CPK calcium-dependent protein kinase 2.7.11.1 ko04626; Organismal Systems; Environmental adaptation; Plant-pathogen interaction | ko05145; Human Diseases; Infectious diseases: Parasitic; Toxoplasmosis}	{At1g50700; KOG0032 Ca2+/calmodulin-dependent protein kinase, EF-Hand protein superfamily T Signal transduction mechanisms ;}	{GO:0005737; cytoplasm; cellular_component GO:0016787; hydrolase activity; molecular_function GO:0005515; protein binding; molecular_function GO:0016020; membrane; cellular_component GO:0005524; ATP binding; molecular_function GO:0004812; aminoacyl-tRNA ligase activity; molecular_function GO:0004672; protein kinase activity; molecular_function GO:0005578; proteinaceous extracellular matrix; cellu…	{XM_010677414.2; PREDICTED: Beta vulgaris subsp. vulgaris calcium-dependent protein kinase 33 (LOC104891685), mRNA}	{PF12763:Cytoskeletal-regulatory complex EF hand PF00069:Protein kinase domain PF13833:EF-hand domain pair PF13202:EF hand PF07714:Protein tyrosine kinase PF10591:Secreted protein acidic and rich in cysteine Ca binding region PF04558:Glutaminyl-tRNA synthetase, non-specific RNA binding region part 1 PF13499:EF-hand domain pair PF13405:EF-hand domain PF01979:Amidohydrolase family PF06293:Lipopolys…
transcript_HQ_BAB_transcript11798/f2p0/2351	2.9468e-12	1.3744e-11	{XP_010678309.1; PREDICTED: calcium-dependent protein kinase 11 [Beta vulgaris subsp. vulgaris]}	{sp|Q38869|CDPK4_ARATH; calcium-dependent protein kinase 4 OS=Arabidopsis thaliana GN=CPK4 PE=1 SV=1}	{bvg:104893863; K13412 CPK calcium-dependent protein kinase 2.7.11.1 ko04626; Organismal Systems; Environmental adaptation; Plant-pathogen interaction | ko05145; Human Diseases; Infectious diseases: Parasitic; Toxoplasmosis}	{At4g09570; KOG0032 Ca2+/calmodulin-dependent protein kinase, EF-Hand protein superfamily T Signal transduction mechanisms ;}	{GO:0004672; protein kinase activity; molecular_function GO:0004812; aminoacyl-tRNA ligase activity; molecular_function GO:0016020; membrane; cellular_component GO:0005524; ATP binding; molecular_function GO:0005515; protein binding; molecular_function GO:0005737; cytoplasm; cellular_component GO:0000166; nucleotide binding; molecular_function GO:0016773; phosphotransferase activity, alcohol grou…	{XM_010680007.2; PREDICTED: Beta vulgaris subsp. vulgaris calcium-dependent protein kinase 11 (LOC104893863), mRNA}	{PF06293:Lipopolysaccharide kinase (Kdo/WaaP) family PF00036:EF hand PF13405:EF-hand domain PF10591:Secreted protein acidic and rich in cysteine Ca binding region PF04558:Glutaminyl-tRNA synthetase, non-specific RNA binding region part 1 PF13499:EF-hand domain pair PF12763:Cytoskeletal-regulatory complex EF hand PF00069:Protein kinase domain PF13833:EF-hand domain pair PF07714:Protein tyrosine ki…
transcript_HQ_BAB_transcript11698/f3p0/2371	8.6737e-99	2.4765e-97	{XP_010690560.1; PREDICTED: calcium-dependent protein kinase 26 [Beta vulgaris subsp. vulgaris]}	{sp|Q38871|CDPK5_ARATH; calcium-dependent protein kinase 5 OS=Arabidopsis thaliana GN=CPK5 PE=2 SV=1}	{jcu:105635427; K13412 CPK calcium-dependent protein kinase 2.7.11.1 ko04626; Organismal Systems; Environmental adaptation; Plant-pathogen interaction | ko05145; Human Diseases; Infectious diseases: Parasitic; Toxoplasmosis}	{At4g35310; KOG0032 Ca2+/calmodulin-dependent protein kinase, EF-Hand protein superfamily T Signal transduction mechanisms ;}	{GO:0004812; aminoacyl-tRNA ligase activity; molecular_function GO:0004672; protein kinase activity; molecular_function GO:0016020; membrane; cellular_component GO:0005524; ATP binding; molecular_function GO:0005515; protein binding; molecular_function GO:0005737; cytoplasm; cellular_component GO:0006468; protein phosphorylation; biological_process GO:0016773; phosphotransferase activity, alcohol…	{XM_010692258.2; PREDICTED: Beta vulgaris subsp. vulgaris calcium-dependent protein kinase 26 (LOC104904078), mRNA}	{PF12763:Cytoskeletal-regulatory complex EF hand PF00069:Protein kinase domain PF13833:EF-hand domain pair PF07714:Protein tyrosine kinase PF13202:EF hand PF10591:Secreted protein acidic and rich in cysteine Ca binding region PF04558:Glutaminyl-tRNA synthetase, non-specific RNA binding region part 1 PF13499:EF-hand domain pair PF13405:EF-hand domain PF06293:Lipopolysaccharide kinase (Kdo/WaaP) fa…
transcript_HQ_BAB_transcript10534/f2p0/2501	6.4014e-05	0.00017062	{XP_010679935.1; PREDICTED: calcium-dependent protein kinase 18 [Beta vulgaris subsp. vulgaris]}	{sp|Q9FKW4|CDPKS_ARATH; calcium-dependent protein kinase 28 OS=Arabidopsis thaliana GN=CPK28 PE=1 SV=1}	{pper:PRUPE_ppa003676mg; K13412 CPK calcium-dependent protein kinase 2.7.11.1 ko04626; Organismal Systems; Environmental adaptation; Plant-pathogen interaction | ko05145; Human Diseases; Infectious diseases: Parasitic; Toxoplasmosis}	{At5g66210; KOG0032 Ca2+/calmodulin-dependent protein kinase, EF-Hand protein superfamily T Signal transduction mechanisms ;}	{GO:0004672; protein kinase activity; molecular_function GO:0016021; integral to membrane; cellular_component GO:0016020; membrane; cellular_component GO:0005524; ATP binding; molecular_function GO:0016592; mediator complex; cellular_component GO:0047750; cholestenol delta-isomerase activity; molecular_function GO:0006357; regulation of transcription from RNA polymerase II promoter; biological_pr…	{XM_010681633.2; PREDICTED: Beta vulgaris subsp. vulgaris calcium-dependent protein kinase 18 (LOC104895194), mRNA}	{PF07714:Protein tyrosine kinase PF05241:Emopamil binding protein PF00069:Protein kinase domain PF06293:Lipopolysaccharide kinase (Kdo/WaaP) family PF11593:Mediator complex subunit 3 fungal}
transcript_HQ_SAB_transcript9507/f2p0/2340	0.00061453	0.0014514	{KNA11350.1; hypothetical protein SOVF_136020 [Spinacia oleracea]}	{sp|Q09011|CAST_SOLTU; Calcium-binding protein CAST OS=Solanum tuberosum PE=2 SV=1}	{mus:104000021; K13448 CML Calcium-binding protein CML - ko04626; Organismal Systems; Environmental adaptation; Plant-pathogen interaction}	{At4g20780; KOG0027 Calmodulin and related proteins (EF-Hand superfamily) T Signal transduction mechanisms ;}	{GO:0007040; lysosome organization; biological_process GO:0031902; late endosome membrane; cellular_component GO:0005578; proteinaceous extracellular matrix; cellular_component GO:0045121; membrane raft; cellular_component GO:0001919; regulation of receptor recycling; biological_process GO:0032008; positive regulation of TOR signaling cascade; biological_process GO:0005509; calcium ion binding; m…	{XM_010685119.2; PREDICTED: Beta vulgaris subsp. vulgaris probable Calcium-binding protein CML43 (LOC104898106), mRNA}	{PF13202:EF hand PF00036:EF hand PF13833:EF-hand domain pair PF13499:EF-hand domain pair PF10591:Secreted protein acidic and rich in cysteine Ca binding region PF13405:EF-hand domain PF15454:Late endosomal/lysosomal adaptor and MAPK and MTOR activator}
transcript_HQ_SAB_transcript377/f2p0/4650	0.0041473	0.0086731	{XP_010690543.1; PREDICTED: epidermal growth factor receptor substrate 15-like 1 isoform X1 [Beta vulgaris subsp. vulgaris]}	{sp|Q9HGL2|YHLA_SCHPO; Uncharacterized Calcium-binding protein C800.10c OS=Schizosaccharomyces pombe (strain 972 / ATCC 24843) GN=SPBC800.10c PE=4 SV=1}	{fve:101301734; - - - - -}	{At1g21630; KOG0998 Synaptic vesicle protein EHS-1 and related EH domain proteins TU Signal transduction mechanisms ; Intracellular trafficking, secretion, and vesicular transport ;}	{GO:0016021; integral to membrane; cellular_component GO:0005509; calcium ion binding; molecular_function GO:0005515; protein binding; molecular_function}	{XM_010692241.1; PREDICTED: Beta vulgaris subsp. vulgaris epidermal growth factor receptor substrate 15-like 1 (LOC104904066), transcript variant X1, mRNA}	{PF07851:TMPIT-like protein PF13833:EF-hand domain pair PF00036:EF hand PF12763:Cytoskeletal-regulatory complex EF hand PF13202:EF hand PF13405:EF-hand domain PF13499:EF-hand domain pair}
transcript_HQ_SAB_transcript372/f2p0/4669	0.0038038	0.0079982	{XP_010690543.1; PREDICTED: epidermal growth factor receptor substrate 15-like 1 isoform X1 [Beta vulgaris subsp. vulgaris]}	{sp|Q9HGL2|YHLA_SCHPO; Uncharacterized Calcium-binding protein C800.10c OS=Schizosaccharomyces pombe (strain 972 / ATCC 24843) GN=SPBC800.10c PE=4 SV=1}	{fve:101301734; - - - - -}	{At1g21630; KOG0998 Synaptic vesicle protein EHS-1 and related EH domain proteins TU Signal transduction mechanisms ; Intracellular trafficking, secretion, and vesicular transport ;}	{GO:0010508; positive regulation of autophagy; biological_process GO:0016021; integral to membrane; cellular_component GO:0005509; calcium ion binding; molecular_function GO:0005515; protein binding; molecular_function}	{XM_010692241.1; PREDICTED: Beta vulgaris subsp. vulgaris epidermal growth factor receptor substrate 15-like 1 (LOC104904066), transcript variant X1, mRNA}	{PF13833:EF-hand domain pair PF00036:EF hand PF12763:Cytoskeletal-regulatory complex EF hand PF13405:EF-hand domain PF10186:Vacuolar sorting 38 and autophagy-related subunit 14 PF13499:EF-hand domain pair PF07851:TMPIT-like protein PF13202:EF hand}
transcript_HQ_SAB_transcript357/f3p0/4711	0.00037835	0.00091661	{XP_010690543.1; PREDICTED: epidermal growth factor receptor substrate 15-like 1 isoform X1 [Beta vulgaris subsp. vulgaris]}	{sp|Q9HGL2|YHLA_SCHPO; Uncharacterized Calcium-binding protein C800.10c OS=Schizosaccharomyces pombe (strain 972 / ATCC 24843) GN=SPBC800.10c PE=4 SV=1}	{fve:101301734; - - - - -}	{At1g21630; KOG0998 Synaptic vesicle protein EHS-1 and related EH domain proteins TU Signal transduction mechanisms ; Intracellular trafficking, secretion, and vesicular transport ;}	{GO:0005515; protein binding; molecular_function GO:0005509; calcium ion binding; molecular_function GO:0016021; integral to membrane; cellular_component}	{XM_010692241.1; PREDICTED: Beta vulgaris subsp. vulgaris epidermal growth factor receptor substrate 15-like 1 (LOC104904066), transcript variant X1, mRNA}	{PF07851:TMPIT-like protein PF13499:EF-hand domain pair PF13405:EF-hand domain PF12763:Cytoskeletal-regulatory complex EF hand PF13202:EF hand PF00036:EF hand PF13833:EF-hand domain pair}
transcript_HQ_SAB_transcript32139/f3p0/617	1.4559e-70	2.8937e-69	{XP_010694307.1; PREDICTED: Calcium-binding protein PBP1 [Beta vulgaris subsp. vulgaris]}	{sp|Q9LSQ6|PBP1_ARATH; Calcium-binding protein PBP1 OS=Arabidopsis thaliana GN=PBP1 PE=1 SV=1}	{rcu:8288692; - - - - -}	{At4g27280; KOG0028 Ca2+-binding protein (centrin/caltractin), EF-Hand superfamily protein ZD Cytoskeleton ; Cell cycle control, cell division, chromosome partitioning ;}	{GO:0005515; protein binding; molecular_function GO:0005509; calcium ion binding; molecular_function}	{XM_010696005.2; PREDICTED: Beta vulgaris subsp. vulgaris Calcium-binding protein PBP1 (LOC104907119), mRNA}	{PF13499:EF-hand domain pair PF00036:EF hand PF13833:EF-hand domain pair PF12763:Cytoskeletal-regulatory complex EF hand}
transcript_HQ_SAB_transcript30958/f4p0/765	1.292e-134	4.972e-133	{XP_010693254.1; PREDICTED: probable Calcium-binding protein CML30 [Beta vulgaris subsp. vulgaris]}	{sp|Q93Z27|CML45_ARATH; Probable Calcium-binding protein CML45 OS=Arabidopsis thaliana GN=CML45 PE=1 SV=1}	{thj:104805475; K02183 CALM calmodulin - ko04014; Environmental Information Processing; Signal transduction; Ras signaling pathway | ko04015; Environmental Information Processing; Signal transduction; Rap1 signaling pathway | ko04016; Environmental Information Processing; Signal transduction; MAPK signaling pathway - plant | ko04371; Environmental Information Processing; Signal transduction; Apel…	{At5g39670; KOG0027 Calmodulin and related proteins (EF-Hand superfamily) T Signal transduction mechanisms ;}	{GO:0000398; nuclear mRNA splicing, via spliceosome; biological_process GO:0005509; calcium ion binding; molecular_function GO:0005681; spliceosomal complex; cellular_component GO:0007165; signal transduction; biological_process GO:0005578; proteinaceous extracellular matrix; cellular_component}	{XM_017759204.1; PREDICTED: Gossypium arboreum probable Calcium-binding protein CML45 (LOC108459804), mRNA}	{PF04889:Cwf15/Cwc15 cell cycle control protein PF13499:EF-hand domain pair PF13405:EF-hand domain PF10591:Secreted protein acidic and rich in cysteine Ca binding region PF13202:EF hand PF00036:EF hand PF13833:EF-hand domain pair}
transcript_HQ_SAB_transcript29628/f2p0/912	1.0936e-19	7.0963e-19	{KNA10488.1; hypothetical protein SOVF_143520 [Spinacia oleracea]}	{sp|Q9M7R0|ALL8_OLEEU; Calcium-binding allergen Ole e 8 OS=Olea europaea PE=1 SV=1}	{bvg:104888229; K13448 CML Calcium-binding protein CML - ko04626; Organismal Systems; Environmental adaptation; Plant-pathogen interaction}	{At1g18210; KOG0027 Calmodulin and related proteins (EF-Hand superfamily) T Signal transduction mechanisms ;}	{GO:0005509; calcium ion binding; molecular_function GO:0007165; signal transduction; biological_process GO:0005578; proteinaceous extracellular matrix; cellular_component}	{NA}	{PF00036:EF hand PF13833:EF-hand domain pair PF13202:EF hand PF13405:EF-hand domain PF10591:Secreted protein acidic and rich in cysteine Ca binding region PF13499:EF-hand domain pair}
transcript_HQ_SAB_transcript29376/f3p0/947	6.5631e-05	0.00017468	{XP_010671987.1; PREDICTED: probable Calcium-binding protein CML13 [Beta vulgaris subsp. vulgaris]}	{sp|Q94AZ4|CML13_ARATH; Probable Calcium-binding protein CML13 OS=Arabidopsis thaliana GN=CML13 PE=2 SV=1}	{bvg:104888659; K13448 CML Calcium-binding protein CML - ko04626; Organismal Systems; Environmental adaptation; Plant-pathogen interaction}	{At1g12310; KOG0027 Calmodulin and related proteins (EF-Hand superfamily) T Signal transduction mechanisms ;}	{GO:0005509; calcium ion binding; molecular_function GO:0005515; protein binding; molecular_function}	{XM_010673685.1; PREDICTED: Beta vulgaris subsp. vulgaris probable Calcium-binding protein CML13 (LOC104888659), mRNA}	{PF13202:EF hand PF12763:Cytoskeletal-regulatory complex EF hand PF00036:EF hand PF13833:EF-hand domain pair PF13499:EF-hand domain pair PF13405:EF-hand domain}
transcript_HQ_SAB_transcript28668/f2p0/1004	7.5845e-178	3.9962e-176	{KNA10488.1; hypothetical protein SOVF_143520 [Spinacia oleracea]}	{sp|Q9M7R0|ALL8_OLEEU; Calcium-binding allergen Ole e 8 OS=Olea europaea PE=1 SV=1}	{bvg:104888229; K13448 CML Calcium-binding protein CML - ko04626; Organismal Systems; Environmental adaptation; Plant-pathogen interaction}	{At1g18210; KOG0027 Calmodulin and related proteins (EF-Hand superfamily) T Signal transduction mechanisms ;}	{GO:0005509; calcium ion binding; molecular_function GO:0005515; protein binding; molecular_function GO:0005578; proteinaceous extracellular matrix; cellular_component GO:0007165; signal transduction; biological_process}	{NA}	{PF13833:EF-hand domain pair PF00036:EF hand PF13202:EF hand PF12763:Cytoskeletal-regulatory complex EF hand PF13405:EF-hand domain PF10591:Secreted protein acidic and rich in cysteine Ca binding region PF13499:EF-hand domain pair}
transcript_HQ_SAB_transcript27373/f3p0/1044	1.0297e-14	5.443e-14	{XP_010680927.1; PREDICTED: probable Calcium-binding protein CML41 [Beta vulgaris subsp. vulgaris]}	{sp|Q8L3R2|CML41_ARATH; Probable Calcium-binding protein CML41 OS=Arabidopsis thaliana GN=CML41 PE=2 SV=2}	{sly:101253669; K13448 CML Calcium-binding protein CML - ko04626; Organismal Systems; Environmental adaptation; Plant-pathogen interaction}	{At3g50770; KOG0027 Calmodulin and related proteins (EF-Hand superfamily) T Signal transduction mechanisms ;}	{GO:0004553; hydrolase activity, hydrolyzing O-glycosyl compounds; molecular_function GO:0005515; protein binding; molecular_function GO:0005509; calcium ion binding; molecular_function GO:0000272; polysaccharide catabolic process; biological_process}	{NA}	{PF00404:Dockerin type I repeat PF13405:EF-hand domain PF13499:EF-hand domain pair PF00036:EF hand PF13833:EF-hand domain pair PF12763:Cytoskeletal-regulatory complex EF hand PF13202:EF hand}
transcript_HQ_SAB_transcript27369/f3p0/1045	0.010226	0.019983	{XP_010674374.1; PREDICTED: caltractin isoform X2 [Beta vulgaris subsp. vulgaris]}	{sp|P41210|CATR_ATRNU; Caltractin OS=Atriplex nummularia PE=2 SV=1}	{bvg:104890543; K13448 CML Calcium-binding protein CML - ko04626; Organismal Systems; Environmental adaptation; Plant-pathogen interaction}	{At3g50360; KOG0028 Ca2+-binding protein (centrin/caltractin), EF-Hand superfamily protein ZD Cytoskeleton ; Cell cycle control, cell division, chromosome partitioning ;}	{GO:0003899; DNA-directed RNA polymerase activity; molecular_function GO:0005509; calcium ion binding; molecular_function GO:0006351; transcription, DNA-dependent; biological_process GO:0005578; proteinaceous extracellular matrix; cellular_component GO:0005515; protein binding; molecular_function GO:0007165; signal transduction; biological_process}	{XM_010676072.2; PREDICTED: Beta vulgaris subsp. vulgaris caltractin (LOC104890543), transcript variant X2, mRNA}	{PF10591:Secreted protein acidic and rich in cysteine Ca binding region PF03874:RNA polymerase Rpb4 PF13202:EF hand PF13405:EF-hand domain PF13499:EF-hand domain pair PF13833:EF-hand domain pair PF00036:EF hand PF12763:Cytoskeletal-regulatory complex EF hand}
transcript_HQ_SAB_transcript26594/f4p0/1200	3.0599e-73	6.2282e-72	{AEX86943.1; EFh Calcium-binding protein [Haloxylon ammodendron]}	{sp|Q9ZQH1|CML48_ARATH; Probable Calcium-binding protein CML48 OS=Arabidopsis thaliana GN=CML48 PE=2 SV=2}	{pmum:103328045; K13448 CML Calcium-binding protein CML - ko04626; Organismal Systems; Environmental adaptation; Plant-pathogen interaction}	{At2g27480; KOG0037 Ca2+-binding protein, EF-Hand protein superfamily T Signal transduction mechanisms ;}	{GO:0005509; calcium ion binding; molecular_function}	{JN886087.2; Haloxylon ammodendron calcium-dependent protein kinase (CDPK) mRNA, partial cds}	{PF13499:EF-hand domain pair PF13405:EF-hand domain PF13202:EF hand PF00036:EF hand PF13833:EF-hand domain pair}
transcript_HQ_SAB_transcript26316/f2p0/1215	1.2467e-98	3.5451e-97	{KNA20519.1; hypothetical protein SOVF_051520 [Spinacia oleracea]}	{sp|P30188|CML35_ARATH; Probable Calcium-binding protein CML35 OS=Arabidopsis thaliana GN=CML35 PE=2 SV=2}	{bvg:104889440; K13448 CML Calcium-binding protein CML - ko04626; Organismal Systems; Environmental adaptation; Plant-pathogen interaction}	{At2g41410; KOG0027 Calmodulin and related proteins (EF-Hand superfamily) T Signal transduction mechanisms ;}	{GO:0005578; proteinaceous extracellular matrix; cellular_component GO:0007165; signal transduction; biological_process GO:0005509; calcium ion binding; molecular_function}	{NA}	{PF13833:EF-hand domain pair PF00036:EF hand PF13202:EF hand PF10591:Secreted protein acidic and rich in cysteine Ca binding region PF13405:EF-hand domain PF13499:EF-hand domain pair}
transcript_HQ_BAB_transcript20227/f2p0/1154	1.4679e-22	1.0524e-21	{KNA11350.1; hypothetical protein SOVF_136020 [Spinacia oleracea]}	{sp|Q9SVG9|CML42_ARATH; Calcium-binding protein CML42 OS=Arabidopsis thaliana GN=CML42 PE=1 SV=1}	{aly:ARALYDRAFT_658045; K13448 CML Calcium-binding protein CML - ko04626; Organismal Systems; Environmental adaptation; Plant-pathogen interaction}	{At4g20780; KOG0027 Calmodulin and related proteins (EF-Hand superfamily) T Signal transduction mechanisms ;}	{GO:0005509; calcium ion binding; molecular_function GO:0003677; DNA binding; molecular_function GO:0007165; signal transduction; biological_process GO:0005578; proteinaceous extracellular matrix; cellular_component}	{XM_010685119.2; PREDICTED: Beta vulgaris subsp. vulgaris probable Calcium-binding protein CML43 (LOC104898106), mRNA}	{PF13202:EF hand PF01984:Double-stranded DNA-binding domain PF13833:EF-hand domain pair PF13405:EF-hand domain PF00036:EF hand PF13499:EF-hand domain pair PF10591:Secreted protein acidic and rich in cysteine Ca binding region}
transcript_HQ_BAB_transcript20198/f2p0/1165	0.00030604	0.00075029	{KNA11350.1; hypothetical protein SOVF_136020 [Spinacia oleracea]}	{sp|Q09011|CAST_SOLTU; Calcium-binding protein CAST OS=Solanum tuberosum PE=2 SV=1}	{rcu:8271690; K13448 CML Calcium-binding protein CML - ko04626; Organismal Systems; Environmental adaptation; Plant-pathogen interaction}	{At4g20780; KOG0027 Calmodulin and related proteins (EF-Hand superfamily) T Signal transduction mechanisms ;}	{GO:0031902; late endosome membrane; cellular_component GO:0007040; lysosome organization; biological_process GO:0071230; cellular response to amino acid stimulus; biological_process GO:0071986; Ragulator complex; cellular_component GO:0005578; proteinaceous extracellular matrix; cellular_component GO:0007165; signal transduction; biological_process GO:0005509; calcium ion binding; molecular_func…	{XM_010685119.2; PREDICTED: Beta vulgaris subsp. vulgaris probable Calcium-binding protein CML43 (LOC104898106), mRNA}	{PF13405:EF-hand domain PF00036:EF hand PF01984:Double-stranded DNA-binding domain PF13833:EF-hand domain pair PF13202:EF hand PF13499:EF-hand domain pair PF10591:Secreted protein acidic and rich in cysteine Ca binding region PF15454:Late endosomal/lysosomal adaptor and MAPK and MTOR activator}
transcript_HQ_BAB_transcript19938/f2p0/1284	5.5184e-119	1.8685e-117	{KNA24477.1; hypothetical protein SOVF_015280 [Spinacia oleracea]}	{sp|Q8W4L0|CML49_ARATH; Probable Calcium-binding protein CML49 OS=Arabidopsis thaliana GN=CML49 PE=2 SV=1}	{bvg:104889397; K13448 CML Calcium-binding protein CML - ko04626; Organismal Systems; Environmental adaptation; Plant-pathogen interaction}	{At3g10300; KOG0037 Ca2+-binding protein, EF-Hand protein superfamily T Signal transduction mechanisms ;}	{GO:0005509; calcium ion binding; molecular_function}	{XM_010674604.2; PREDICTED: Beta vulgaris subsp. vulgaris probable Calcium-binding protein CML49 (LOC104889397), mRNA}	{PF13405:EF-hand domain PF13202:EF hand PF13833:EF-hand domain pair PF13499:EF-hand domain pair PF00036:EF hand}
transcript_HQ_SAB_transcript4036/f22p0/2997	1.1592e-13	5.8175e-13	{KNA15114.1; hypothetical protein SOVF_101160 [Spinacia oleracea]}	{sp|Q8W4J2|MPK16_ARATH; Mitogen-activated protein kinase 16 OS=Arabidopsis thaliana GN=MPK16 PE=2 SV=2}	{jcu:105631897; - - - - -}	{At5g19010; KOG0660 Mitogen-activated protein kinase T Signal transduction mechanisms ;}	{GO:0005524; ATP binding; molecular_function GO:0016773; phosphotransferase activity, alcohol group as acceptor; molecular_function GO:0016020; membrane; cellular_component GO:0006468; protein phosphorylation; biological_process GO:0004672; protein kinase activity; molecular_function}	{XM_010697007.2; PREDICTED: Beta vulgaris subsp. vulgaris Mitogen-activated protein kinase 16 (LOC104907978), transcript variant X2, mRNA}	{PF06293:Lipopolysaccharide kinase (Kdo/WaaP) family PF00069:Protein kinase domain PF07714:Protein tyrosine kinase}
transcript_HQ_SAB_transcript26194/f2p0/1199	0.00097879	0.0022488	{XP_010680304.1; PREDICTED: WD repeat domain-containing protein 83 [Beta vulgaris subsp. vulgaris]}	{sp|Q5BLX8|WDR83_RAT; WD repeat domain-containing protein 83 OS=Rattus norvegicus GN=Wdr83 PE=1 SV=1}	{pop:POPTR_0001s31400g; K13124 MORG1 Mitogen-activated protein kinase organizer 1 - -}	{At5g64730; KOG0316 Conserved WD40 repeat-containing protein S Function unknown ;}	{GO:0005515; protein binding; molecular_function}	{XM_010682002.2; PREDICTED: Beta vulgaris subsp. vulgaris WD repeat domain-containing protein 83 (LOC104895481), mRNA}	{PF00400:WD domain, G-beta repeat}
transcript_HQ_SAB_transcript20367/f2p0/1611	3.0765e-05	8.5212e-05	{XP_010689418.1; PREDICTED: Mitogen-activated protein kinase 3 [Beta vulgaris subsp. vulgaris]}	{sp|Q39023|MPK3_ARATH; Mitogen-activated protein kinase 3 OS=Arabidopsis thaliana GN=MPK3 PE=1 SV=2}	{jcu:105628161; K20536 MPK3 Mitogen-activated protein kinase 3 2.7.11.24 ko04016; Environmental Information Processing; Signal transduction; MAPK signaling pathway - plant}	{At3g45640; KOG0660 Mitogen-activated protein kinase T Signal transduction mechanisms ;}	{GO:0005524; ATP binding; molecular_function GO:0016773; phosphotransferase activity, alcohol group as acceptor; molecular_function GO:0004672; protein kinase activity; molecular_function GO:0016020; membrane; cellular_component GO:0006468; protein phosphorylation; biological_process}	{XM_010691116.2; PREDICTED: Beta vulgaris subsp. vulgaris Mitogen-activated protein kinase 3 (LOC104903120), mRNA}	{PF06293:Lipopolysaccharide kinase (Kdo/WaaP) family PF07714:Protein tyrosine kinase PF00069:Protein kinase domain}
transcript_HQ_SAB_transcript18689/f2p0/1699	1.7179e-12	8.1198e-12	{XP_010672463.1; PREDICTED: Mitogen-activated protein kinase homolog MMK1 [Beta vulgaris subsp. vulgaris]}	{sp|Q07176|MMK1_MEDSA; Mitogen-activated protein kinase homolog MMK1 OS=Medicago sativa GN=MMK1 PE=1 SV=1}	{bvg:104889027; K14512 MPK6 Mitogen-activated protein kinase 6 2.7.11.24 ko04016; Environmental Information Processing; Signal transduction; MAPK signaling pathway - plant | ko04075; Environmental Information Processing; Signal transduction; Plant hormone signal transduction}	{At2g43790; KOG0660 Mitogen-activated protein kinase T Signal transduction mechanisms ;}	{GO:0005524; ATP binding; molecular_function GO:0016773; phosphotransferase activity, alcohol group as acceptor; molecular_function GO:0004672; protein kinase activity; molecular_function GO:0006468; protein phosphorylation; biological_process GO:0016020; membrane; cellular_component}	{XM_010674161.2; PREDICTED: Beta vulgaris subsp. vulgaris Mitogen-activated protein kinase homolog MMK1 (LOC104889027), mRNA}	{PF06293:Lipopolysaccharide kinase (Kdo/WaaP) family PF07714:Protein tyrosine kinase PF00069:Protein kinase domain}
transcript_HQ_SAB_transcript17937/f2p0/1685	8.0362e-07	2.5942e-06	{XP_010672463.1; PREDICTED: Mitogen-activated protein kinase homolog MMK1 [Beta vulgaris subsp. vulgaris]}	{sp|Q07176|MMK1_MEDSA; Mitogen-activated protein kinase homolog MMK1 OS=Medicago sativa GN=MMK1 PE=1 SV=1}	{bvg:104889027; K14512 MPK6 Mitogen-activated protein kinase 6 2.7.11.24 ko04016; Environmental Information Processing; Signal transduction; MAPK signaling pathway - plant | ko04075; Environmental Information Processing; Signal transduction; Plant hormone signal transduction}	{At2g43790; KOG0660 Mitogen-activated protein kinase T Signal transduction mechanisms ;}	{GO:0005524; ATP binding; molecular_function GO:0016773; phosphotransferase activity, alcohol group as acceptor; molecular_function GO:0016020; membrane; cellular_component GO:0006468; protein phosphorylation; biological_process GO:0004672; protein kinase activity; molecular_function}	{XM_010674161.2; PREDICTED: Beta vulgaris subsp. vulgaris Mitogen-activated protein kinase homolog MMK1 (LOC104889027), mRNA}	{PF07714:Protein tyrosine kinase PF00069:Protein kinase domain PF06293:Lipopolysaccharide kinase (Kdo/WaaP) family}
transcript_HQ_SAB_transcript17929/f2p0/1738	7.2391e-19	4.5561e-18	{XP_010689418.1; PREDICTED: Mitogen-activated protein kinase 3 [Beta vulgaris subsp. vulgaris]}	{sp|Q39023|MPK3_ARATH; Mitogen-activated protein kinase 3 OS=Arabidopsis thaliana GN=MPK3 PE=1 SV=2}	{gra:105788924; K20536 MPK3 Mitogen-activated protein kinase 3 2.7.11.24 ko04016; Environmental Information Processing; Signal transduction; MAPK signaling pathway - plant}	{At3g45640; KOG0660 Mitogen-activated protein kinase T Signal transduction mechanisms ;}	{GO:0006468; protein phosphorylation; biological_process GO:0016020; membrane; cellular_component GO:0004672; protein kinase activity; molecular_function GO:0016773; phosphotransferase activity, alcohol group as acceptor; molecular_function GO:0005524; ATP binding; molecular_function}	{XM_010691116.2; PREDICTED: Beta vulgaris subsp. vulgaris Mitogen-activated protein kinase 3 (LOC104903120), mRNA}	{PF06293:Lipopolysaccharide kinase (Kdo/WaaP) family PF00069:Protein kinase domain PF07714:Protein tyrosine kinase}
transcript_HQ_SAB_transcript17517/f7p0/1746	3.9581e-54	5.9564e-53	{KNA19828.1; hypothetical protein SOVF_057800 [Spinacia oleracea]}	{sp|Q40353|MMK2_MEDSA; Mitogen-activated protein kinase homolog MMK2 OS=Medicago sativa GN=MMK2 PE=2 SV=1}	{bvg:104887071; - - - - -}	{At4g01370; KOG0660 Mitogen-activated protein kinase T Signal transduction mechanisms ;}	{GO:0005524; ATP binding; molecular_function GO:0016773; phosphotransferase activity, alcohol group as acceptor; molecular_function GO:0006468; protein phosphorylation; biological_process GO:0016020; membrane; cellular_component GO:0004672; protein kinase activity; molecular_function}	{XM_010671660.2; PREDICTED: Beta vulgaris subsp. vulgaris Mitogen-activated protein kinase homolog MMK2 (LOC104887071), mRNA}	{PF06293:Lipopolysaccharide kinase (Kdo/WaaP) family PF07714:Protein tyrosine kinase PF00069:Protein kinase domain}
transcript_HQ_SAB_transcript14049/f3p0/1967	1.7012e-79	3.7716e-78	{XP_010689418.1; PREDICTED: Mitogen-activated protein kinase 3 [Beta vulgaris subsp. vulgaris]}	{sp|Q39023|MPK3_ARATH; Mitogen-activated protein kinase 3 OS=Arabidopsis thaliana GN=MPK3 PE=1 SV=2}	{gra:105788924; K20536 MPK3 Mitogen-activated protein kinase 3 2.7.11.24 ko04016; Environmental Information Processing; Signal transduction; MAPK signaling pathway - plant}	{At3g45640; KOG0660 Mitogen-activated protein kinase T Signal transduction mechanisms ;}	{GO:0005524; ATP binding; molecular_function GO:0016773; phosphotransferase activity, alcohol group as acceptor; molecular_function GO:0006468; protein phosphorylation; biological_process GO:0016020; membrane; cellular_component GO:0004672; protein kinase activity; molecular_function}	{XM_010691116.2; PREDICTED: Beta vulgaris subsp. vulgaris Mitogen-activated protein kinase 3 (LOC104903120), mRNA}	{PF06293:Lipopolysaccharide kinase (Kdo/WaaP) family PF07714:Protein tyrosine kinase PF00069:Protein kinase domain}
transcript_HQ_SAB_transcript13950/f3p0/1991	2.346e-06	7.2571e-06	{XP_010689418.1; PREDICTED: Mitogen-activated protein kinase 3 [Beta vulgaris subsp. vulgaris]}	{sp|Q39023|MPK3_ARATH; Mitogen-activated protein kinase 3 OS=Arabidopsis thaliana GN=MPK3 PE=1 SV=2}	{jcu:105628161; K20536 MPK3 Mitogen-activated protein kinase 3 2.7.11.24 ko04016; Environmental Information Processing; Signal transduction; MAPK signaling pathway - plant}	{At3g45640; KOG0660 Mitogen-activated protein kinase T Signal transduction mechanisms ;}	{GO:0004672; protein kinase activity; molecular_function GO:0006468; protein phosphorylation; biological_process GO:0016020; membrane; cellular_component GO:0016773; phosphotransferase activity, alcohol group as acceptor; molecular_function GO:0005524; ATP binding; molecular_function}	{XM_010691116.2; PREDICTED: Beta vulgaris subsp. vulgaris Mitogen-activated protein kinase 3 (LOC104903120), mRNA}	{PF07714:Protein tyrosine kinase PF00069:Protein kinase domain PF06293:Lipopolysaccharide kinase (Kdo/WaaP) family}
transcript_HQ_SAB_transcript13059/f2p0/2056	2.8798e-184	1.5804e-182	{XP_010689418.1; PREDICTED: Mitogen-activated protein kinase 3 [Beta vulgaris subsp. vulgaris]}	{sp|Q39023|MPK3_ARATH; Mitogen-activated protein kinase 3 OS=Arabidopsis thaliana GN=MPK3 PE=1 SV=2}	{gra:105788924; K20536 MPK3 Mitogen-activated protein kinase 3 2.7.11.24 ko04016; Environmental Information Processing; Signal transduction; MAPK signaling pathway - plant}	{At3g45640; KOG0660 Mitogen-activated protein kinase T Signal transduction mechanisms ;}	{GO:0016773; phosphotransferase activity, alcohol group as acceptor; molecular_function GO:0005524; ATP binding; molecular_function GO:0006468; protein phosphorylation; biological_process GO:0016020; membrane; cellular_component GO:0004672; protein kinase activity; molecular_function}	{XM_010691116.2; PREDICTED: Beta vulgaris subsp. vulgaris Mitogen-activated protein kinase 3 (LOC104903120), mRNA}	{PF00069:Protein kinase domain PF07714:Protein tyrosine kinase PF06293:Lipopolysaccharide kinase (Kdo/WaaP) family}
transcript_HQ_SAB_transcript12569/f3p0/2093	0.0045166	0.0093886	{KNA07823.1; hypothetical protein SOVF_168320 [Spinacia oleracea]}	{sp|Q9LV37|MPK9_ARATH; Mitogen-activated protein kinase 9 OS=Arabidopsis thaliana GN=MPK9 PE=2 SV=2}	{bvg:104893685; K20538 MPK8 Mitogen-activated protein kinase 8 2.7.11.24 ko04016; Environmental Information Processing; Signal transduction; MAPK signaling pathway - plant}	{At3g18040; KOG0660 Mitogen-activated protein kinase T Signal transduction mechanisms ;}	{GO:0005524; ATP binding; molecular_function GO:0016773; phosphotransferase activity, alcohol group as acceptor; molecular_function GO:0016020; membrane; cellular_component GO:0006468; protein phosphorylation; biological_process GO:0004672; protein kinase activity; molecular_function}	{XM_010679816.2; PREDICTED: Beta vulgaris subsp. vulgaris Mitogen-activated protein kinase 9 (LOC104893685), mRNA}	{PF07714:Protein tyrosine kinase PF00069:Protein kinase domain PF06293:Lipopolysaccharide kinase (Kdo/WaaP) family}
transcript_HQ_SAB_transcript12485/f4p0/2031	1.4902e-14	7.8105e-14	{XP_010672965.1; PREDICTED: Mitogen-activated protein kinase homolog NTF3 [Beta vulgaris subsp. vulgaris]}	{sp|Q40517|NTF3_TOBAC; Mitogen-activated protein kinase homolog NTF3 OS=Nicotiana tabacum GN=NTF3 PE=1 SV=1}	{bvg:104889438; K20535 MPK1_2 Mitogen-activated protein kinase 1/2 2.7.11.24 ko04016; Environmental Information Processing; Signal transduction; MAPK signaling pathway - plant}	{At1g10210; KOG0660 Mitogen-activated protein kinase T Signal transduction mechanisms ;}	{GO:0004672; protein kinase activity; molecular_function GO:0006468; protein phosphorylation; biological_process GO:0016020; membrane; cellular_component GO:0016773; phosphotransferase activity, alcohol group as acceptor; molecular_function GO:0005524; ATP binding; molecular_function}	{XM_010674663.2; PREDICTED: Beta vulgaris subsp. vulgaris Mitogen-activated protein kinase homolog NTF3 (LOC104889438), transcript variant X1, mRNA}	{PF00069:Protein kinase domain PF07714:Protein tyrosine kinase PF06293:Lipopolysaccharide kinase (Kdo/WaaP) family}
transcript_HQ_BAB_transcript9924/f6p0/2578	3.8065e-06	1.1538e-05	{XP_010694749.1; PREDICTED: Mitogen-activated protein kinase 19 [Beta vulgaris subsp. vulgaris]}	{sp|Q9LUC3|MPK19_ARATH; Mitogen-activated protein kinase 19 OS=Arabidopsis thaliana GN=MPK19 PE=2 SV=2}	{jcu:105632438; - - - - -}	{At3g14720; KOG0660 Mitogen-activated protein kinase T Signal transduction mechanisms ;}	{GO:0016773; phosphotransferase activity, alcohol group as acceptor; molecular_function GO:0016020; membrane; cellular_component GO:0005524; ATP binding; molecular_function GO:0006468; protein phosphorylation; biological_process GO:0004672; protein kinase activity; molecular_function}	{XM_010696447.2; PREDICTED: Beta vulgaris subsp. vulgaris Mitogen-activated protein kinase 19 (LOC104907508), mRNA}	{PF06293:Lipopolysaccharide kinase (Kdo/WaaP) family PF07714:Protein tyrosine kinase PF00069:Protein kinase domain}
transcript_HQ_BAB_transcript6388/f5p0/3013	0.0040508	0.0084888	{KNA15114.1; hypothetical protein SOVF_101160 [Spinacia oleracea]}	{sp|Q8W4J2|MPK16_ARATH; Mitogen-activated protein kinase 16 OS=Arabidopsis thaliana GN=MPK16 PE=2 SV=2}	{jcu:105631897; - - - - -}	{At5g19010; KOG0660 Mitogen-activated protein kinase T Signal transduction mechanisms ;}	{GO:0016773; phosphotransferase activity, alcohol group as acceptor; molecular_function GO:0016020; membrane; cellular_component GO:0005524; ATP binding; molecular_function GO:0006468; protein phosphorylation; biological_process GO:0004672; protein kinase activity; molecular_function}	{XM_010697007.2; PREDICTED: Beta vulgaris subsp. vulgaris Mitogen-activated protein kinase 16 (LOC104907978), transcript variant X2, mRNA}	{PF06293:Lipopolysaccharide kinase (Kdo/WaaP) family PF00069:Protein kinase domain PF07714:Protein tyrosine kinase}
transcript_HQ_BAB_transcript19819/f3p0/1324	1.8544e-51	2.6781e-50	{KNA13378.1; hypothetical protein SOVF_117550 [Spinacia oleracea]}	{sp|Q06060|MPK_PEA; Mitogen-activated protein kinase homolog D5 OS=Pisum sativum PE=2 SV=1}	{gra:105788924; K20536 MPK3 Mitogen-activated protein kinase 3 2.7.11.24 ko04016; Environmental Information Processing; Signal transduction; MAPK signaling pathway - plant}	{At2g43790; KOG0660 Mitogen-activated protein kinase T Signal transduction mechanisms ;}	{NA}	{XM_010691116.2; PREDICTED: Beta vulgaris subsp. vulgaris Mitogen-activated protein kinase 3 (LOC104903120), mRNA}	{NA}
transcript_HQ_BAB_transcript18140/f3p0/1666	4.7964e-33	4.6635e-32	{XP_010689418.1; PREDICTED: Mitogen-activated protein kinase 3 [Beta vulgaris subsp. vulgaris]}	{sp|Q39023|MPK3_ARATH; Mitogen-activated protein kinase 3 OS=Arabidopsis thaliana GN=MPK3 PE=1 SV=2}	{gra:105788924; K20536 MPK3 Mitogen-activated protein kinase 3 2.7.11.24 ko04016; Environmental Information Processing; Signal transduction; MAPK signaling pathway - plant}	{At3g45640; KOG0660 Mitogen-activated protein kinase T Signal transduction mechanisms ;}	{GO:0004672; protein kinase activity; molecular_function GO:0016773; phosphotransferase activity, alcohol group as acceptor; molecular_function GO:0016020; membrane; cellular_component GO:0005524; ATP binding; molecular_function GO:0006468; protein phosphorylation; biological_process}	{XM_010691116.2; PREDICTED: Beta vulgaris subsp. vulgaris Mitogen-activated protein kinase 3 (LOC104903120), mRNA}	{PF07714:Protein tyrosine kinase PF00069:Protein kinase domain PF06293:Lipopolysaccharide kinase (Kdo/WaaP) family}
transcript_HQ_BAB_transcript17955/f5p0/1627	2.0487e-05	5.7805e-05	{XP_010672463.1; PREDICTED: Mitogen-activated protein kinase homolog MMK1 [Beta vulgaris subsp. vulgaris]}	{sp|Q07176|MMK1_MEDSA; Mitogen-activated protein kinase homolog MMK1 OS=Medicago sativa GN=MMK1 PE=1 SV=1}	{bvg:104889027; K14512 MPK6 Mitogen-activated protein kinase 6 2.7.11.24 ko04016; Environmental Information Processing; Signal transduction; MAPK signaling pathway - plant | ko04075; Environmental Information Processing; Signal transduction; Plant hormone signal transduction}	{At2g43790; KOG0660 Mitogen-activated protein kinase T Signal transduction mechanisms ;}	{GO:0016020; membrane; cellular_component GO:0016773; phosphotransferase activity, alcohol group as acceptor; molecular_function GO:0005524; ATP binding; molecular_function GO:0006468; protein phosphorylation; biological_process GO:0004672; protein kinase activity; molecular_function}	{XM_010674161.2; PREDICTED: Beta vulgaris subsp. vulgaris Mitogen-activated protein kinase homolog MMK1 (LOC104889027), mRNA}	{PF06293:Lipopolysaccharide kinase (Kdo/WaaP) family PF00069:Protein kinase domain PF07714:Protein tyrosine kinase}
transcript_HQ_BAB_transcript17683/f3p0/1703	5.7947e-13	2.8164e-12	{KNA19828.1; hypothetical protein SOVF_057800 [Spinacia oleracea]}	{sp|Q40353|MMK2_MEDSA; Mitogen-activated protein kinase homolog MMK2 OS=Medicago sativa GN=MMK2 PE=2 SV=1}	{bvg:104887071; - - - - -}	{At4g01370; KOG0660 Mitogen-activated protein kinase T Signal transduction mechanisms ;}	{GO:0004672; protein kinase activity; molecular_function GO:0006468; protein phosphorylation; biological_process GO:0016773; phosphotransferase activity, alcohol group as acceptor; molecular_function GO:0016020; membrane; cellular_component GO:0005524; ATP binding; molecular_function}	{XM_010671660.2; PREDICTED: Beta vulgaris subsp. vulgaris Mitogen-activated protein kinase homolog MMK2 (LOC104887071), mRNA}	{PF00069:Protein kinase domain PF07714:Protein tyrosine kinase PF06293:Lipopolysaccharide kinase (Kdo/WaaP) family}
transcript_HQ_BAB_transcript17358/f2p0/1753	3.20648604150969e-321	3.74289311319953e-319	{KNA19828.1; hypothetical protein SOVF_057800 [Spinacia oleracea]}	{sp|Q40353|MMK2_MEDSA; Mitogen-activated protein kinase homolog MMK2 OS=Medicago sativa GN=MMK2 PE=2 SV=1}	{bvg:104887071; - - - - -}	{At4g01370; KOG0660 Mitogen-activated protein kinase T Signal transduction mechanisms ;}	{GO:0004672; protein kinase activity; molecular_function GO:0016773; phosphotransferase activity, alcohol group as acceptor; molecular_function GO:0016020; membrane; cellular_component GO:0006468; protein phosphorylation; biological_process GO:0005524; ATP binding; molecular_function}	{XM_010671660.2; PREDICTED: Beta vulgaris subsp. vulgaris Mitogen-activated protein kinase homolog MMK2 (LOC104887071), mRNA}	{PF07714:Protein tyrosine kinase PF00069:Protein kinase domain PF06293:Lipopolysaccharide kinase (Kdo/WaaP) family}
transcript_HQ_BAB_transcript17078/f2p0/1786	0.0017737	0.0039237	{XP_010689413.1; PREDICTED: Mitogen-activated protein kinase homolog NTF6 [Beta vulgaris subsp. vulgaris]}	{sp|Q40531|NTF6_TOBAC; Mitogen-activated protein kinase homolog NTF6 OS=Nicotiana tabacum GN=NTF6 PE=2 SV=1}	{pper:PRUPE_ppa007376mg; K04371 MAPK1_3 Mitogen-activated protein kinase 1/3 2.7.11.24 ko04014; Environmental Information Processing; Signal transduction; Ras signaling pathway | ko04015; Environmental Information Processing; Signal transduction; Rap1 signaling pathway | ko04010; Environmental Information Processing; Signal transduction; MAPK signaling pathway | ko04013; Environmental Information…	{At1g07880; KOG0660 Mitogen-activated protein kinase T Signal transduction mechanisms ;}	{GO:0016020; membrane; cellular_component GO:0016773; phosphotransferase activity, alcohol group as acceptor; molecular_function GO:0006468; protein phosphorylation; biological_process GO:0005524; ATP binding; molecular_function GO:0004672; protein kinase activity; molecular_function}	{XM_010691111.2; PREDICTED: Beta vulgaris subsp. vulgaris Mitogen-activated protein kinase homolog NTF6 (LOC104903118), mRNA}	{PF00069:Protein kinase domain PF07714:Protein tyrosine kinase PF06293:Lipopolysaccharide kinase (Kdo/WaaP) family}
transcript_HQ_BAB_transcript13364/f2p0/2184	3.5295e-12	1.6382e-11	{XP_010672965.1; PREDICTED: Mitogen-activated protein kinase homolog NTF3 [Beta vulgaris subsp. vulgaris]}	{sp|Q40517|NTF3_TOBAC; Mitogen-activated protein kinase homolog NTF3 OS=Nicotiana tabacum GN=NTF3 PE=1 SV=1}	{bvg:104889438; K20535 MPK1_2 Mitogen-activated protein kinase 1/2 2.7.11.24 ko04016; Environmental Information Processing; Signal transduction; MAPK signaling pathway - plant}	{At1g10210; KOG0660 Mitogen-activated protein kinase T Signal transduction mechanisms ;}	{GO:0016773; phosphotransferase activity, alcohol group as acceptor; molecular_function GO:0006468; protein phosphorylation; biological_process GO:0016020; membrane; cellular_component GO:0005524; ATP binding; molecular_function GO:0004672; protein kinase activity; molecular_function}	{XM_010674663.2; PREDICTED: Beta vulgaris subsp. vulgaris Mitogen-activated protein kinase homolog NTF3 (LOC104889438), transcript variant X1, mRNA}	{PF00069:Protein kinase domain PF07714:Protein tyrosine kinase PF06293:Lipopolysaccharide kinase (Kdo/WaaP) family}
transcript_HQ_BAB_transcript12163/f2p0/2309	3.4067e-13	1.6739e-12	{KNA17082.1; hypothetical protein SOVF_081890 [Spinacia oleracea]}	{sp|Q8W4J2|MPK16_ARATH; Mitogen-activated protein kinase 16 OS=Arabidopsis thaliana GN=MPK16 PE=2 SV=2}	{bvg:104888257; - - - - -}	{At5g19010; KOG0660 Mitogen-activated protein kinase T Signal transduction mechanisms ;}	{NA}	{XM_019248510.1; PREDICTED: Beta vulgaris subsp. vulgaris zinc finger protein CONSTANS-LIKE 7 (LOC104888257), transcript variant X2, mRNA}	{NA}
transcript_HQ_SAB_transcript25018/f3p0/1295	8.6224e-26	6.8538e-25	{XP_010672118.1; PREDICTED: Mitogen-activated protein kinase kinase 9 [Beta vulgaris subsp. vulgaris]}	{sp|Q9FX43|M2K9_ARATH; Mitogen-activated protein kinase kinase 9 OS=Arabidopsis thaliana GN=MKK9 PE=1 SV=1}	{bvg:104888757; K20604 MKK9 Mitogen-activated protein kinase kinase 9 2.7.12.2 ko04016; Environmental Information Processing; Signal transduction; MAPK signaling pathway - plant}	{At1g73500; KOG0581 Mitogen-activated protein kinase kinase (MAP2K) T Signal transduction mechanisms ;}	{GO:0016773; phosphotransferase activity, alcohol group as acceptor; molecular_function GO:0005524; ATP binding; molecular_function GO:0016020; membrane; cellular_component GO:0006468; protein phosphorylation; biological_process GO:0004672; protein kinase activity; molecular_function}	{XM_012222994.1; PREDICTED: Jatropha curcas Mitogen-activated protein kinase kinase 9 (LOC105639059), mRNA}	{PF06293:Lipopolysaccharide kinase (Kdo/WaaP) family PF07714:Protein tyrosine kinase PF00069:Protein kinase domain}
transcript_HQ_SAB_transcript21468/f3p0/1581	1.5278e-33	1.5055e-32	{XP_010671270.1; PREDICTED: Mitogen-activated protein kinase kinase kinase 1 [Beta vulgaris subsp. vulgaris]}	{sp|Q39008|M3K1_ARATH; Mitogen-activated protein kinase kinase kinase 1 OS=Arabidopsis thaliana GN=MEKK1 PE=1 SV=2}	{bvg:104888091; K13414 MEKK1 Mitogen-activated protein kinase kinase kinase 1 2.7.11.25 ko04016; Environmental Information Processing; Signal transduction; MAPK signaling pathway - plant | ko04626; Organismal Systems; Environmental adaptation; Plant-pathogen interaction}	{At4g08500; KOG0198 MEKK and related serine/threonine protein kinases T Signal transduction mechanisms ;}	{GO:0006468; protein phosphorylation; biological_process GO:0004672; protein kinase activity; molecular_function GO:0005524; ATP binding; molecular_function}	{XM_003523419.3; PREDICTED: Glycine max Mitogen-activated protein kinase kinase kinase 1-like (LOC100819999), mRNA}	{PF00069:Protein kinase domain PF07714:Protein tyrosine kinase}
transcript_HQ_SAB_transcript21345/f2p0/1531	3.018e-08	1.0907e-07	{KNA12661.1; hypothetical protein SOVF_123560 [Spinacia oleracea]}	{sp|O80397|M2K4_ARATH; Mitogen-activated protein kinase kinase 4 OS=Arabidopsis thaliana GN=MKK4 PE=1 SV=1}	{sind:105157897; K13413 MKK4_5 Mitogen-activated protein kinase kinase 4/5 2.7.12.2 ko04016; Environmental Information Processing; Signal transduction; MAPK signaling pathway - plant | ko04075; Environmental Information Processing; Signal transduction; Plant hormone signal transduction | ko04626; Organismal Systems; Environmental adaptation; Plant-pathogen interaction}	{At1g51660; KOG0581 Mitogen-activated protein kinase kinase (MAP2K) T Signal transduction mechanisms ;}	{GO:0004672; protein kinase activity; molecular_function GO:0006468; protein phosphorylation; biological_process GO:0005524; ATP binding; molecular_function}	{XM_010688977.2; PREDICTED: Beta vulgaris subsp. vulgaris Mitogen-activated protein kinase kinase 5 (LOC104901405), mRNA}	{PF00069:Protein kinase domain PF07714:Protein tyrosine kinase}
transcript_HQ_SAB_transcript18534/f3p0/1750	2.3427e-42	2.843e-41	{AFR11233.1; mitogen activated protein kinase kinase [Chenopodium album]}	{sp|Q9S7U9|M2K2_ARATH; Mitogen-activated protein kinase kinase 2 OS=Arabidopsis thaliana GN=MKK2 PE=1 SV=2}	{cit:102625262; K20603 MKK2 Mitogen-activated protein kinase kinase 2 2.7.12.2 ko04016; Environmental Information Processing; Signal transduction; MAPK signaling pathway - plant}	{At4g29810; KOG0581 Mitogen-activated protein kinase kinase (MAP2K) T Signal transduction mechanisms ;}	{GO:0016020; membrane; cellular_component GO:0006468; protein phosphorylation; biological_process GO:0004672; protein kinase activity; molecular_function GO:0005524; ATP binding; molecular_function GO:0016773; phosphotransferase activity, alcohol group as acceptor; molecular_function}	{JQ994336.1; Chenopodium album mitogen activated protein kinase kinase (mapkk2) mRNA, complete cds}	{PF06293:Lipopolysaccharide kinase (Kdo/WaaP) family PF07714:Protein tyrosine kinase PF00069:Protein kinase domain}
transcript_HQ_SAB_transcript13079/f5p0/2040	1.5016e-08	5.5417e-08	{AAM19158.1; Mitogen-activated protein kinase kinase [Suaeda salsa]}	{sp|O80396|M2K3_ARATH; Mitogen-activated protein kinase kinase 3 OS=Arabidopsis thaliana GN=MKK3 PE=1 SV=1}	{bvg:104891726; K20607 MKK3 Mitogen-activated protein kinase kinase 3 2.7.12.2 ko04016; Environmental Information Processing; Signal transduction; MAPK signaling pathway - plant | ko05418; Human Diseases; Cardiovascular diseases; Fluid shear stress and atherosclerosis}	{At5g40440; KOG0581 Mitogen-activated protein kinase kinase (MAP2K) T Signal transduction mechanisms ;}	{GO:0006468; protein phosphorylation; biological_process GO:0004672; protein kinase activity; molecular_function GO:0005524; ATP binding; molecular_function}	{XM_010677465.2; PREDICTED: Beta vulgaris subsp. vulgaris Mitogen-activated protein kinase kinase 3 (LOC104891726), mRNA}	{PF07714:Protein tyrosine kinase PF00069:Protein kinase domain}
transcript_HQ_BAB_transcript6078/f3p0/3095	7.4062e-27	6.0533e-26	{KNA12661.1; hypothetical protein SOVF_123560 [Spinacia oleracea]}	{sp|O80397|M2K4_ARATH; Mitogen-activated protein kinase kinase 4 OS=Arabidopsis thaliana GN=MKK4 PE=1 SV=1}	{sind:105157897; K13413 MKK4_5 Mitogen-activated protein kinase kinase 4/5 2.7.12.2 ko04016; Environmental Information Processing; Signal transduction; MAPK signaling pathway - plant | ko04075; Environmental Information Processing; Signal transduction; Plant hormone signal transduction | ko04626; Organismal Systems; Environmental adaptation; Plant-pathogen interaction}	{At1g51660; KOG0581 Mitogen-activated protein kinase kinase (MAP2K) T Signal transduction mechanisms ;}	{GO:0006468; protein phosphorylation; biological_process GO:0005524; ATP binding; molecular_function GO:0004672; protein kinase activity; molecular_function}	{XM_010688977.2; PREDICTED: Beta vulgaris subsp. vulgaris Mitogen-activated protein kinase kinase 5 (LOC104901405), mRNA}	{PF00069:Protein kinase domain PF07714:Protein tyrosine kinase}
transcript_HQ_BAB_transcript13742/f2p0/2133	8.7838e-05	0.00023035	{AAM19158.1; Mitogen-activated protein kinase kinase [Suaeda salsa]}	{sp|O80396|M2K3_ARATH; Mitogen-activated protein kinase kinase 3 OS=Arabidopsis thaliana GN=MKK3 PE=1 SV=1}	{bvg:104891726; K20607 MKK3 Mitogen-activated protein kinase kinase 3 2.7.12.2 ko04016; Environmental Information Processing; Signal transduction; MAPK signaling pathway - plant | ko05418; Human Diseases; Cardiovascular diseases; Fluid shear stress and atherosclerosis}	{At5g40440; KOG0581 Mitogen-activated protein kinase kinase (MAP2K) T Signal transduction mechanisms ;}	{GO:0004672; protein kinase activity; molecular_function GO:0005524; ATP binding; molecular_function GO:0006468; protein phosphorylation; biological_process}	{XM_010677465.2; PREDICTED: Beta vulgaris subsp. vulgaris Mitogen-activated protein kinase kinase 3 (LOC104891726), mRNA}	{PF07714:Protein tyrosine kinase PF00069:Protein kinase domain}
transcript_HQ_SAB_transcript24421/f11p0/1307	3.5842e-05	9.8411e-05	{KNA08706.1; hypothetical protein SOVF_160260 [Spinacia oleracea]}	{sp|Q54R82|MKKA_DICDI; Mitogen-activated protein kinase kinase kinase A OS=Dictyostelium discoideum GN=mkkA PE=1 SV=2}	{gra:105787627; - - - - -}	{At3g50310; KOG0198 MEKK and related serine/threonine protein kinases T Signal transduction mechanisms ;}	{GO:0005524; ATP binding; molecular_function GO:0004672; protein kinase activity; molecular_function GO:0006468; protein phosphorylation; biological_process GO:0003968; RNA-directed RNA polymerase activity; molecular_function}	{XM_010669107.2; PREDICTED: Beta vulgaris subsp. vulgaris Mitogen-activated protein kinase kinase kinase A (LOC104884459), mRNA}	{PF12603:Protein of unknown function (DUF3770) PF07714:Protein tyrosine kinase PF00069:Protein kinase domain}
transcript_HQ_BAB_transcript6969/f2p0/2983	1.7114e-05	4.8645e-05	{KNA25513.1; hypothetical protein SOVF_005980 [Spinacia oleracea]}	{sp|Q9CAD5|YODA_ARATH; Mitogen-activated protein kinase kinase kinase YODA OS=Arabidopsis thaliana GN=YDA PE=1 SV=1}	{nnu:104596035; K20717 YDA Mitogen-activated protein kinase kinase kinase YODA 2.7.11.25 ko04016; Environmental Information Processing; Signal transduction; MAPK signaling pathway - plant}	{At1g63700; KOG0198 MEKK and related serine/threonine protein kinases T Signal transduction mechanisms ;}	{GO:0019882; antigen processing and presentation; biological_process GO:0006955; immune response; biological_process GO:0004672; protein kinase activity; molecular_function GO:0042613; MHC class II protein complex; cellular_component GO:0016020; membrane; cellular_component GO:0006468; protein phosphorylation; biological_process GO:0005524; ATP binding; molecular_function}	{KF975685.1; Brassica napus cultivar DH12075 Mitogen-activated protein kinase kinase kinase 4.1 (MAPKKK4.1) mRNA, complete cds}	{PF00069:Protein kinase domain PF07714:Protein tyrosine kinase PF00969:Class II histocompatibility antigen, beta domain}
transcript_HQ_BAB_transcript5973/f2p0/3124	6.8114e-09	2.5712e-08	{XP_010680440.1; PREDICTED: Mitogen-activated protein kinase kinase kinase YODA [Beta vulgaris subsp. vulgaris]}	{sp|Q9C5H5|M3K5G_ARATH; Mitogen-activated protein kinase kinase kinase 5 OS=Arabidopsis thaliana GN=MAPKKK5 PE=1 SV=1}	{vvi:100245919; - - - - -}	{At5g66850; KOG0198 MEKK and related serine/threonine protein kinases T Signal transduction mechanisms ;}	{GO:0004672; protein kinase activity; molecular_function GO:0006468; protein phosphorylation; biological_process GO:0005524; ATP binding; molecular_function}	{XM_010682138.2; PREDICTED: Beta vulgaris subsp. vulgaris Mitogen-activated protein kinase kinase kinase YODA (LOC104895584), mRNA}	{PF00069:Protein kinase domain PF07714:Protein tyrosine kinase}
transcript_HQ_BAB_transcript5955/f3p0/3110	7.9139e-15	4.1959e-14	{XP_010680440.1; PREDICTED: Mitogen-activated protein kinase kinase kinase YODA [Beta vulgaris subsp. vulgaris]}	{sp|Q9C5H5|M3K5G_ARATH; Mitogen-activated protein kinase kinase kinase 5 OS=Arabidopsis thaliana GN=MAPKKK5 PE=1 SV=1}	{vvi:100245919; - - - - -}	{At5g66850; KOG0198 MEKK and related serine/threonine protein kinases T Signal transduction mechanisms ;}	{GO:0005524; ATP binding; molecular_function GO:0006468; protein phosphorylation; biological_process GO:0004672; protein kinase activity; molecular_function}	{XM_010682138.2; PREDICTED: Beta vulgaris subsp. vulgaris Mitogen-activated protein kinase kinase kinase YODA (LOC104895584), mRNA}	{PF00069:Protein kinase domain PF07714:Protein tyrosine kinase}
transcript_HQ_BAB_transcript18396/f17p0/1604	8.1269e-14	4.1009e-13	{KNA23213.1; hypothetical protein SOVF_026890 [Spinacia oleracea]}	{sp|Q54R82|MKKA_DICDI; Mitogen-activated protein kinase kinase kinase A OS=Dictyostelium discoideum GN=mkkA PE=1 SV=2}	{pper:PRUPE_ppa016693mg; - - - - -}	{At2g30040; KOG0198 MEKK and related serine/threonine protein kinases T Signal transduction mechanisms ;}	{GO:0004672; protein kinase activity; molecular_function GO:0006468; protein phosphorylation; biological_process GO:0005524; ATP binding; molecular_function}	{AK336641.1; Lotus japonicus cDNA, clone: LjFL1-016-BC12, HTC}	{PF00069:Protein kinase domain PF07714:Protein tyrosine kinase}
transcript_HQ_BAB_transcript16112/f2p0/1899	1.1628e-05	3.364e-05	{XP_010680195.1; PREDICTED: Mitogen-activated protein kinase kinase kinase YODA [Beta vulgaris subsp. vulgaris]}	{sp|F4HRJ4|M3K3A_ARATH; Mitogen-activated protein kinase kinase kinase 3 OS=Arabidopsis thaliana GN=MAPKKK3 PE=1 SV=1}	{fve:101313251; - - - - -}	{At1g53570; KOG0198 MEKK and related serine/threonine protein kinases T Signal transduction mechanisms ;}	{GO:0004672; protein kinase activity; molecular_function GO:0016773; phosphotransferase activity, alcohol group as acceptor; molecular_function GO:0016020; membrane; cellular_component GO:0006468; protein phosphorylation; biological_process GO:0005524; ATP binding; molecular_function}	{XM_010681893.2; PREDICTED: Beta vulgaris subsp. vulgaris Mitogen-activated protein kinase kinase kinase YODA (LOC104895397), mRNA}	{PF00069:Protein kinase domain PF07714:Protein tyrosine kinase PF06293:Lipopolysaccharide kinase (Kdo/WaaP) family}
transcript_HQ_BAB_transcript11444/f2p0/2384	3.1747e-10	1.3114e-09	{KNA12875.1; hypothetical protein SOVF_121150 [Spinacia oleracea]}	{sp|Q39008|M3K1_ARATH; Mitogen-activated protein kinase kinase kinase 1 OS=Arabidopsis thaliana GN=MEKK1 PE=1 SV=2}	{bvg:104888091; K13414 MEKK1 Mitogen-activated protein kinase kinase kinase 1 2.7.11.25 ko04016; Environmental Information Processing; Signal transduction; MAPK signaling pathway - plant | ko04626; Organismal Systems; Environmental adaptation; Plant-pathogen interaction}	{At4g08500; KOG0198 MEKK and related serine/threonine protein kinases T Signal transduction mechanisms ;}	{GO:0004672; protein kinase activity; molecular_function GO:0005524; ATP binding; molecular_function GO:0016773; phosphotransferase activity, alcohol group as acceptor; molecular_function GO:0016020; membrane; cellular_component GO:0006468; protein phosphorylation; biological_process}	{XM_003523419.3; PREDICTED: Glycine max Mitogen-activated protein kinase kinase kinase 1-like (LOC100819999), mRNA}	{PF07714:Protein tyrosine kinase PF00069:Protein kinase domain PF06293:Lipopolysaccharide kinase (Kdo/WaaP) family}

## Sheet: LB vs. HB
Table S4 DEGs related to drought signals in Haloxylon persicum
Gene_id	log2FoldChange	pval	padj	{nr}	{SwissProt}	{KEGG}	{KOG}	{GO}	{nt}	{pfam}
transcript_HQ_SAB_transcript11844/f14p0/2122	-0.86785	1.8503e-09	4.5577e-09	{XP_010676702.1; PREDICTED: abscisic acid 8'-hydroxylase 1-like [Beta vulgaris subsp. vulgaris]}	{sp|Q949P1|ABAH1_ARATH; Abscisic acid 8'-hydroxylase 1 OS=Arabidopsis thaliana GN=CYP707A1 PE=2 SV=1}	{bvg:104892458; K09843 E1.14.13.93 (+)-abscisic acid 8'-hydroxylase 1.14.13.93 ko00906; Metabolism; Metabolism of terpenoids and polyketides; Carotenoid biosynthesis}	{At5g45340; KOG0157 Cytochrome P450 CYP4/CYP19/CYP26 subfamilies QI Secondary metabolites biosynthesis, transport and catabolism ; Lipid transport and metabolism ;}	{GO:0005506; iron ion binding; molecular_function GO:0020037; heme binding; molecular_function GO:0016705; oxidoreductase activity, acting on paired donors, with incorporation or reduction of molecular oxygen; molecular_function GO:0055114; oxidation-reduction process; biological_process}	{XM_010678400.2; PREDICTED: Beta vulgaris subsp. vulgaris abscisic acid 8'-hydroxylase 1-like (LOC104892458), mRNA}	{PF00067:Cytochrome P450}
transcript_HQ_SAB_transcript26530/f6p0/1153	-2.3204	4.2185e-36	2.4143e-35	{KNA13133.1; hypothetical protein SOVF_119530 [Spinacia oleracea]}	{sp|Q84MC7|PYL9_ARATH; Abscisic acid receptor PYL9 OS=Arabidopsis thaliana GN=PYL9 PE=1 SV=1}	{bvg:104886203; K14496 PYL abscisic acid receptor PYR/PYL family - ko04016; Environmental Information Processing; Signal transduction; MAPK signaling pathway - plant | ko04075; Environmental Information Processing; Signal transduction; Plant hormone signal transduction}	{NA}	{GO:0009607; response to biotic stimulus; biological_process GO:0006952; defense response; biological_process}	{XM_010097482.1; Morus notabilis hypothetical protein partial mRNA}	{PF00407:Pathogenesis-related protein Bet v I family}
transcript_HQ_SAB_transcript23012/f3p0/1427	2.142	1.5352e-32	8.0563e-32	{XP_010671508.1; PREDICTED: abscisic acid receptor PYL8 [Beta vulgaris subsp. vulgaris]}	{sp|Q9FGM1|PYL8_ARATH; Abscisic acid receptor PYL8 OS=Arabidopsis thaliana GN=PYL8 PE=1 SV=1}	{bvg:104888286; K14496 PYL abscisic acid receptor PYR/PYL family - ko04016; Environmental Information Processing; Signal transduction; MAPK signaling pathway - plant | ko04075; Environmental Information Processing; Signal transduction; Plant hormone signal transduction}	{NA}	{NA}	{XM_010673206.2; PREDICTED: Beta vulgaris subsp. vulgaris abscisic acid receptor PYL8 (LOC104888286), mRNA}	{NA}
transcript_HQ_SAB_transcript25502/f3p0/1255	-1.0292	2.4304e-12	6.8483e-12	{XP_010687552.1; PREDICTED: uncharacterized protein LOC104901657 [Beta vulgaris subsp. vulgaris]}	{sp|Q8LGS1|MARD1_ARATH; Protein MARD1 OS=Arabidopsis thaliana GN=MARD1 PE=2 SV=2}	{vvi:100264520; - - - - -}	{NA}	{NA}	{XM_010689250.2; PREDICTED: Beta vulgaris subsp. vulgaris hypothetical protein (LOC104901657), mRNA}	{NA}
transcript_HQ_SAB_transcript13088/f4p0/2025	-1.3567	9.0676e-06	1.7949e-05	{XP_010670779.1; PREDICTED: uncharacterized protein LOC104887750 [Beta vulgaris subsp. vulgaris]}	{sp|Q8LGS1|MARD1_ARATH; Protein MARD1 OS=Arabidopsis thaliana GN=MARD1 PE=2 SV=2}	{bvg:104887750; - - - - -}	{NA}	{GO:0016787; hydrolase activity; molecular_function}	{XM_010672477.2; PREDICTED: Beta vulgaris subsp. vulgaris uncharacterized LOC104887750 (LOC104887750), mRNA}	{PF00293:NUDIX domain}
transcript_HQ_SAB_transcript8234/f2p0/2492	-1.7256	5.7677e-41	3.6392e-40	{KNA11963.1; hypothetical protein SOVF_130220 [Spinacia oleracea]}	{sp|Q9LRR7|NCED3_ARATH; 9-cis-epoxycarotenoid dioxygenase NCED3, chloroplastic OS=Arabidopsis thaliana GN=NCED3 PE=2 SV=1}	{cann:107852027; - - - - -}	{At3g14440; KOG1285 Beta, beta-carotene 15,15'-dioxygenase and related enzymes Q Secondary metabolites biosynthesis, transport and catabolism ;}	{GO:0009898; internal side of plasma membrane; cellular_component GO:0016702; oxidoreductase activity, acting on single donors with incorporation of molecular oxygen, incorporation of two atoms of oxygen; molecular_function GO:0016020; membrane; cellular_component GO:0055114; oxidation-reduction process; biological_process}	{AY466118.1; Gentiana lutea 9-cis-epoxycarotenoid dioxygenase (NCED2) mRNA, complete cds}	{PF07348:Syd protein (SUKH-2) PF03055:Retinal pigment epithelial membrane protein PF01299:Lysosome-associated membrane glycoprotein (Lamp)}
transcript_HQ_SAB_transcript11340/f2p0/2204	-1.3691	1.6317e-05	3.1704e-05	{XP_010666721.1; PREDICTED: probable 9-cis-epoxycarotenoid dioxygenase NCED5, chloroplastic [Beta vulgaris subsp. vulgaris]}	{sp|Q9M6E8|NCED1_PHAVU; 9-cis-epoxycarotenoid dioxygenase NCED1, chloroplastic OS=Phaseolus vulgaris GN=NCED1 PE=2 SV=1}	{jcu:105634001; K09840 NCED 9-cis-epoxycarotenoid dioxygenase 1.13.11.51 ko00906; Metabolism; Metabolism of terpenoids and polyketides; Carotenoid biosynthesis}	{At3g14440; KOG1285 Beta, beta-carotene 15,15'-dioxygenase and related enzymes Q Secondary metabolites biosynthesis, transport and catabolism ;}	{GO:0055114; oxidation-reduction process; biological_process GO:0016702; oxidoreductase activity, acting on single donors with incorporation of molecular oxygen, incorporation of two atoms of oxygen; molecular_function}	{HM156274.1; Solanum chilense isolate 101A 9-cis-epoxycarotenoid dioxygenase (NCED1) gene, partial cds}	{PF03055:Retinal pigment epithelial membrane protein}
transcript_HQ_BAB_transcript13096/f3p0/2229	5.3729	2.7037e-269	1.9987e-267	{KNA11963.1; hypothetical protein SOVF_130220 [Spinacia oleracea]}	{sp|Q9LRR7|NCED3_ARATH; 9-cis-epoxycarotenoid dioxygenase NCED3, chloroplastic OS=Arabidopsis thaliana GN=NCED3 PE=2 SV=1}	{cann:107852027; - - - - -}	{At3g14440; KOG1285 Beta, beta-carotene 15,15'-dioxygenase and related enzymes Q Secondary metabolites biosynthesis, transport and catabolism ;}	{GO:0006260; DNA replication; biological_process GO:0016702; oxidoreductase activity, acting on single donors with incorporation of molecular oxygen, incorporation of two atoms of oxygen; molecular_function GO:0055114; oxidation-reduction process; biological_process GO:0005634; nucleus; cellular_component GO:0009898; internal side of plasma membrane; cellular_component}	{XM_007213552.1; Prunus persica hypothetical protein (PRUPE_ppa002314mg) mRNA, complete cds}	{PF07348:Syd protein (SUKH-2) PF03055:Retinal pigment epithelial membrane protein PF09507:DNA polymerase subunit Cdc27}
transcript_HQ_SAB_transcript9891/f3p0/2295	-1.5053	4.1066e-24	1.7257e-23	{XP_010671495.1; PREDICTED: Probable protein phosphatase 2C 76 [Beta vulgaris subsp. vulgaris]}	{sp|Q94AT1|P2C76_ARATH; Probable protein phosphatase 2C 76 OS=Arabidopsis thaliana GN=At5g53140 PE=2 SV=1}	{bvg:104888280; K17506 PPM1L, PP2CE protein phosphatase 1L 3.1.3.16 -}	{At5g53140; KOG0698 Serine/threonine protein phosphatase T Signal transduction mechanisms ;}	{GO:0003824; NA}	{XM_010673193.2; PREDICTED: Beta vulgaris subsp. vulgaris Probable protein phosphatase 2C 76 (LOC104888280), mRNA}	{PF00481:Protein phosphatase 2C}
transcript_HQ_SAB_transcript9339/f4p0/2361	-1.6171	7.3983e-23	2.9788e-22	{XP_010685523.1; PREDICTED: Probable protein phosphatase 2C 25 [Beta vulgaris subsp. vulgaris]}	{sp|Q9XEE8|P2C30_ARATH; Probable protein phosphatase 2C 30 OS=Arabidopsis thaliana GN=PP2C5 PE=2 SV=1}	{egr:104432633; - - - - -}	{At2g40180; KOG0698 Serine/threonine protein phosphatase T Signal transduction mechanisms ;}	{NA}	{XM_010687221.2; PREDICTED: Beta vulgaris subsp. vulgaris Probable protein phosphatase 2C 25 (LOC104899930), mRNA}	{NA}
transcript_HQ_SAB_transcript8715/f2p0/2426	-1.9331	2.5884e-12	7.279e-12	{KNA09453.1; hypothetical protein SOVF_153500, partial [Spinacia oleracea]}	{sp|Q6J2K6|BIP2C_ORYSI; Probable protein phosphatase 2C BIPP2C1 OS=Oryza sativa subsp. indica GN=BIPP2C1 PE=2 SV=1}	{vvi:100262272; - - - - -}	{At4g33500_1; KOG1379 Serine/threonine protein phosphatase T Signal transduction mechanisms ;}	{GO:0003824; NA}	{XM_010668562.2; PREDICTED: Beta vulgaris subsp. vulgaris Probable protein phosphatase 2C 62 (LOC104883980), transcript variant X2, mRNA}	{PF07228:Stage II sporulation protein E (SpoIIE) PF00481:Protein phosphatase 2C}
transcript_HQ_SAB_transcript8711/f2p0/2421	-3.1255	9.4512e-08	2.1205e-07	{KNA09453.1; hypothetical protein SOVF_153500, partial [Spinacia oleracea]}	{sp|Q6J2K6|BIP2C_ORYSI; Probable protein phosphatase 2C BIPP2C1 OS=Oryza sativa subsp. indica GN=BIPP2C1 PE=2 SV=1}	{vvi:100262272; - - - - -}	{At4g33500_1; KOG1379 Serine/threonine protein phosphatase T Signal transduction mechanisms ;}	{GO:0003824; NA}	{XM_010668562.2; PREDICTED: Beta vulgaris subsp. vulgaris Probable protein phosphatase 2C 62 (LOC104883980), transcript variant X2, mRNA}	{PF07228:Stage II sporulation protein E (SpoIIE) PF00481:Protein phosphatase 2C}
transcript_HQ_SAB_transcript8627/f4p0/2428	0.41	0.020116	0.029185	{XP_010670734.1; PREDICTED: Probable protein phosphatase 2C 22 [Beta vulgaris subsp. vulgaris]}	{sp|Q9SLA1|P2C22_ARATH; Probable protein phosphatase 2C 22 OS=Arabidopsis thaliana GN=At2g25620 PE=2 SV=1}	{bvg:104887717; K14803 PTC2_3 protein phosphatase PTC2/3 3.1.3.16 -}	{At2g25620; KOG0698 Serine/threonine protein phosphatase T Signal transduction mechanisms ;}	{GO:0003824; NA}	{XM_010672432.2; PREDICTED: Beta vulgaris subsp. vulgaris Probable protein phosphatase 2C 22 (LOC104887717), mRNA}	{PF00481:Protein phosphatase 2C}
transcript_HQ_SAB_transcript8132/f2p0/2486	2.6837	6.254e-34	3.398e-33	{XP_010685766.1; PREDICTED: Probable protein phosphatase 2C 23 [Beta vulgaris subsp. vulgaris]}	{sp|Q9ZV25|P2C23_ARATH; Probable protein phosphatase 2C 23 OS=Arabidopsis thaliana GN=PLL4 PE=2 SV=1}	{egr:104432739; - - - - -}	{At2g28890; KOG0700 Protein phosphatase 2C/pyruvate dehydrogenase (lipoamide) phosphatase T Signal transduction mechanisms ;}	{GO:0003824; NA}	{XM_010687464.2; PREDICTED: Beta vulgaris subsp. vulgaris Probable protein phosphatase 2C 23 (LOC104900119), mRNA}	{PF07228:Stage II sporulation protein E (SpoIIE) PF00481:Protein phosphatase 2C}
transcript_HQ_SAB_transcript7492/f2p0/2586	3.7144	6.7808e-73	7.2907e-72	{KNA22674.1; hypothetical protein SOVF_032320 [Spinacia oleracea]}	{sp|Q9CAJ0|P2C16_ARATH; Protein phosphatase 2C 16 OS=Arabidopsis thaliana GN=HAB1 PE=1 SV=1}	{cmo:103488507; K14497 PP2C protein phosphatase 2C 3.1.3.16 ko04016; Environmental Information Processing; Signal transduction; MAPK signaling pathway - plant | ko04075; Environmental Information Processing; Signal transduction; Plant hormone signal transduction | ko04931; Human Diseases; Endocrine and metabolic diseases; Insulin resistance}	{At1g72770; KOG0698 Serine/threonine protein phosphatase T Signal transduction mechanisms ;}	{GO:0003824; NA}	{XM_010698249.2; PREDICTED: Beta vulgaris subsp. vulgaris Probable protein phosphatase 2C 50 (LOC104909063), mRNA}	{PF00481:Protein phosphatase 2C PF07228:Stage II sporulation protein E (SpoIIE)}
transcript_HQ_SAB_transcript7330/f4p0/2535	-2.5483	3.2751e-08	7.5519e-08	{KNA22674.1; hypothetical protein SOVF_032320 [Spinacia oleracea]}	{sp|Q9CAJ0|P2C16_ARATH; Protein phosphatase 2C 16 OS=Arabidopsis thaliana GN=HAB1 PE=1 SV=1}	{cmo:103488507; K14497 PP2C protein phosphatase 2C 3.1.3.16 ko04016; Environmental Information Processing; Signal transduction; MAPK signaling pathway - plant | ko04075; Environmental Information Processing; Signal transduction; Plant hormone signal transduction | ko04931; Human Diseases; Endocrine and metabolic diseases; Insulin resistance}	{At1g72770; KOG0698 Serine/threonine protein phosphatase T Signal transduction mechanisms ;}	{GO:0003824; NA}	{XM_010698249.2; PREDICTED: Beta vulgaris subsp. vulgaris Probable protein phosphatase 2C 50 (LOC104909063), mRNA}	{PF07228:Stage II sporulation protein E (SpoIIE) PF00481:Protein phosphatase 2C}
transcript_HQ_SAB_transcript6791/f2p0/2682	-0.63737	1.0973e-05	2.1611e-05	{KNA05523.1; hypothetical protein SOVF_189480 isoform A [Spinacia oleracea]}	{sp|Q93YS2|P2C51_ARATH; Probable protein phosphatase 2C 51 OS=Arabidopsis thaliana GN=At3g63340 PE=2 SV=2}	{csv:101210198; - - - - -}	{At3g63340_1; KOG0698 Serine/threonine protein phosphatase T Signal transduction mechanisms ;}	{GO:0003824; NA}	{NA}	{PF00481:Protein phosphatase 2C}
transcript_HQ_SAB_transcript6723/f2p0/2648	-1.1097	9.6076e-05	0.00017638	{XP_010667446.1; PREDICTED: Probable protein phosphatase 2C 35 [Beta vulgaris subsp. vulgaris]}	{sp|Q7XJ53|P2C35_ARATH; Probable protein phosphatase 2C 35 OS=Arabidopsis thaliana GN=At3g06270 PE=2 SV=1}	{pmum:103322878; - - - - -}	{At3g06270; KOG0698 Serine/threonine protein phosphatase T Signal transduction mechanisms ;}	{GO:0003824; NA}	{XM_010669145.2; PREDICTED: Beta vulgaris subsp. vulgaris Probable protein phosphatase 2C 35 (LOC104884490), transcript variant X2, mRNA}	{PF07228:Stage II sporulation protein E (SpoIIE) PF00481:Protein phosphatase 2C}
transcript_HQ_SAB_transcript6544/f2p0/2679	-2.1132	3.941e-10	1.0011e-09	{XP_010690331.1; PREDICTED: Probable protein phosphatase 2C 60 [Beta vulgaris subsp. vulgaris]}	{sp|Q10S32|P2C28_ORYSJ; Probable protein phosphatase 2C 28 OS=Oryza sativa subsp. japonica GN=Os03g0137200 PE=2 SV=1}	{pper:PRUPE_ppa006747mg; K01102 PDP pyruvate dehydrogenase phosphatase 3.1.3.43 -}	{At4g38520; KOG0700 Protein phosphatase 2C/pyruvate dehydrogenase (lipoamide) phosphatase T Signal transduction mechanisms ;}	{GO:0003824; NA}	{XM_010692030.2; PREDICTED: Beta vulgaris subsp. vulgaris Probable protein phosphatase 2C 60 (LOC104903895), transcript variant X1, mRNA}	{PF07228:Stage II sporulation protein E (SpoIIE) PF00481:Protein phosphatase 2C}
transcript_HQ_SAB_transcript6406/f2p0/2701	-2.5086	1.2459e-44	8.4474e-44	{XP_010685766.1; PREDICTED: Probable protein phosphatase 2C 23 [Beta vulgaris subsp. vulgaris]}	{sp|Q9ZV25|P2C23_ARATH; Probable protein phosphatase 2C 23 OS=Arabidopsis thaliana GN=PLL4 PE=2 SV=1}	{pper:PRUPE_ppa001966mg; - - - - -}	{At2g28890; KOG0700 Protein phosphatase 2C/pyruvate dehydrogenase (lipoamide) phosphatase T Signal transduction mechanisms ;}	{GO:0003824; NA}	{XM_010687464.2; PREDICTED: Beta vulgaris subsp. vulgaris Probable protein phosphatase 2C 23 (LOC104900119), mRNA}	{PF00481:Protein phosphatase 2C PF07228:Stage II sporulation protein E (SpoIIE)}
transcript_HQ_SAB_transcript6381/f5p0/2673	-2.0187	1.3826e-42	9.044e-42	{XP_010690331.1; PREDICTED: Probable protein phosphatase 2C 60 [Beta vulgaris subsp. vulgaris]}	{sp|Q10S32|P2C28_ORYSJ; Probable protein phosphatase 2C 28 OS=Oryza sativa subsp. japonica GN=Os03g0137200 PE=2 SV=1}	{pper:PRUPE_ppa006747mg; K01102 PDP pyruvate dehydrogenase phosphatase 3.1.3.43 -}	{At4g38520; KOG0700 Protein phosphatase 2C/pyruvate dehydrogenase (lipoamide) phosphatase T Signal transduction mechanisms ;}	{GO:0003824; NA}	{XM_010692030.2; PREDICTED: Beta vulgaris subsp. vulgaris Probable protein phosphatase 2C 60 (LOC104903895), transcript variant X1, mRNA}	{PF07228:Stage II sporulation protein E (SpoIIE) PF00481:Protein phosphatase 2C}
transcript_HQ_SAB_transcript5268/f3p0/2817	-1.8544	2.409e-05	4.6244e-05	{KNA11988.1; hypothetical protein SOVF_130010 [Spinacia oleracea]}	{sp|Q9ZV25|P2C23_ARATH; Probable protein phosphatase 2C 23 OS=Arabidopsis thaliana GN=PLL4 PE=2 SV=1}	{nnu:104594549; - - - - -}	{At2g28890; KOG0700 Protein phosphatase 2C/pyruvate dehydrogenase (lipoamide) phosphatase T Signal transduction mechanisms ;}	{GO:0003824; NA GO:0016021; integral to membrane; cellular_component}	{XM_010687464.2; PREDICTED: Beta vulgaris subsp. vulgaris Probable protein phosphatase 2C 23 (LOC104900119), mRNA}	{PF07228:Stage II sporulation protein E (SpoIIE) PF00481:Protein phosphatase 2C PF09726:Transmembrane protein}
transcript_HQ_SAB_transcript4835/f2p0/2946	-1.434	9.785e-22	3.8133e-21	{KNA22674.1; hypothetical protein SOVF_032320 [Spinacia oleracea]}	{sp|Q9CAJ0|P2C16_ARATH; Protein phosphatase 2C 16 OS=Arabidopsis thaliana GN=HAB1 PE=1 SV=1}	{cmo:103488507; K14497 PP2C protein phosphatase 2C 3.1.3.16 ko04016; Environmental Information Processing; Signal transduction; MAPK signaling pathway - plant | ko04075; Environmental Information Processing; Signal transduction; Plant hormone signal transduction | ko04931; Human Diseases; Endocrine and metabolic diseases; Insulin resistance}	{At1g72770; KOG0698 Serine/threonine protein phosphatase T Signal transduction mechanisms ;}	{GO:0003824; NA}	{XM_010698249.2; PREDICTED: Beta vulgaris subsp. vulgaris Probable protein phosphatase 2C 50 (LOC104909063), mRNA}	{PF00481:Protein phosphatase 2C PF07228:Stage II sporulation protein E (SpoIIE)}
transcript_HQ_SAB_transcript3325/f2p0/3214	-2.6344	4.5504e-65	4.387e-64	{XP_010679444.1; PREDICTED: Probable protein phosphatase 2C 2 isoform X1 [Beta vulgaris subsp. vulgaris]}	{sp|Q9FYN7|P2C02_ORYSJ; Probable protein phosphatase 2C 2 OS=Oryza sativa subsp. japonica GN=Os01g0295700 PE=2 SV=1}	{bvg:104894812; K14803 PTC2_3 protein phosphatase PTC2/3 3.1.3.16 -}	{At3g62260; KOG0698 Serine/threonine protein phosphatase T Signal transduction mechanisms ;}	{GO:0003824; NA}	{XM_010681143.2; PREDICTED: Beta vulgaris subsp. vulgaris Probable protein phosphatase 2C 2 (LOC104894812), transcript variant X2, mRNA}	{PF00481:Protein phosphatase 2C}
transcript_HQ_SAB_transcript32013/f6p0/589	1.8869	5.3406e-06	1.0751e-05	{NA}	{NA}	{NA}	{NA}	{NA}	{XM_010675605.2; PREDICTED: Beta vulgaris subsp. vulgaris Probable protein phosphatase 2C 33 (LOC104890210), transcript variant X2, mRNA}	{NA}
transcript_HQ_SAB_transcript31628/f2p0/683	-3.4141	2.5313e-07	5.5447e-07	{NA}	{NA}	{jcu:105650748; - - - - -}	{NA}	{NA}	{XM_009589138.2; PREDICTED: Nicotiana tomentosiformis Probable protein phosphatase 2C 63 (LOC104085161), transcript variant X2, mRNA}	{NA}
transcript_HQ_SAB_transcript25639/f3p0/1253	0.46597	0.022263	0.032122	{XP_010685894.1; PREDICTED: Probable protein phosphatase 2C 26 [Beta vulgaris subsp. vulgaris]}	{sp|Q942P9|P2C01_ORYSJ; Probable protein phosphatase 2C 1 OS=Oryza sativa subsp. japonica GN=Os01g0164600 PE=2 SV=1}	{jcu:105639212; K17508 PTC7, PPTC7 protein phosphatase PTC7 3.1.3.16 -}	{At2g30170; KOG1379 Serine/threonine protein phosphatase T Signal transduction mechanisms ;}	{GO:0003824; NA}	{XM_010687592.2; PREDICTED: Beta vulgaris subsp. vulgaris Probable protein phosphatase 2C 26 (LOC104900218), mRNA}	{PF00481:Protein phosphatase 2C PF07228:Stage II sporulation protein E (SpoIIE)}
transcript_HQ_SAB_transcript25312/f3p0/1265	-0.45951	0.0048162	0.0075329	{KNA05525.1; hypothetical protein SOVF_189480 isoform C [Spinacia oleracea]}	{sp|Q93YS2|P2C51_ARATH; Probable protein phosphatase 2C 51 OS=Arabidopsis thaliana GN=At3g63340 PE=2 SV=2}	{vvi:100263200; - - - - -}	{At3g63340_1; KOG0698 Serine/threonine protein phosphatase T Signal transduction mechanisms ;}	{GO:0003824; NA}	{NA}	{PF00481:Protein phosphatase 2C}
transcript_HQ_SAB_transcript24337/f3p0/1347	0.48325	0.0011913	0.0019883	{XP_010692979.1; PREDICTED: Probable protein phosphatase 2C 59 isoform X2 [Beta vulgaris subsp. vulgaris]}	{sp|Q8RXV3|P2C59_ARATH; Probable protein phosphatase 2C 59 OS=Arabidopsis thaliana GN=WIN2 PE=1 SV=1}	{thj:104803865; K17506 PPM1L, PP2CE protein phosphatase 1L 3.1.3.16 -}	{At5g24940; KOG0698 Serine/threonine protein phosphatase T Signal transduction mechanisms ;}	{GO:0003824; NA}	{XM_010694677.2; PREDICTED: Beta vulgaris subsp. vulgaris Probable protein phosphatase 2C 59 (LOC104906000), transcript variant X2, mRNA}	{PF00481:Protein phosphatase 2C}
transcript_HQ_SAB_transcript24323/f2p0/1356	-1.6416	5.1403e-06	1.0358e-05	{XP_010685894.1; PREDICTED: Probable protein phosphatase 2C 26 [Beta vulgaris subsp. vulgaris]}	{sp|O64730|P2C26_ARATH; Probable protein phosphatase 2C 26 OS=Arabidopsis thaliana GN=At2g30170 PE=2 SV=2}	{cic:CICLE_v10028878mg; K17508 PTC7, PPTC7 protein phosphatase PTC7 3.1.3.16 -}	{At2g30170; KOG1379 Serine/threonine protein phosphatase T Signal transduction mechanisms ;}	{GO:0003824; NA}	{XR_001995895.1; PREDICTED: Juglans regia Probable protein phosphatase 2C 26 (LOC108989880), transcript variant X1, misc_RNA}	{PF00481:Protein phosphatase 2C PF07228:Stage II sporulation protein E (SpoIIE)}
transcript_HQ_SAB_transcript24293/f5p0/1324	-0.89292	0.0025387	0.0040838	{KNA13245.1; hypothetical protein SOVF_118530 [Spinacia oleracea]}	{sp|Q93YW5|P2C58_ARATH; Probable protein phosphatase 2C 58 OS=Arabidopsis thaliana GN=At4g28400 PE=2 SV=1}	{cit:102608973; - - - - -}	{At3g15260; KOG0698 Serine/threonine protein phosphatase T Signal transduction mechanisms ;}	{GO:0003824; NA}	{XM_010690757.2; PREDICTED: Beta vulgaris subsp. vulgaris Probable protein phosphatase 2C 39 (LOC104902838), mRNA}	{PF07228:Stage II sporulation protein E (SpoIIE) PF00481:Protein phosphatase 2C}
transcript_HQ_SAB_transcript24189/f3p0/1384	Inf	3.1804e-259	2.059e-257	{XP_010685523.1; PREDICTED: Probable protein phosphatase 2C 25 [Beta vulgaris subsp. vulgaris]}	{sp|O80871|P2C25_ARATH; Probable protein phosphatase 2C 25 OS=Arabidopsis thaliana GN=At2g30020 PE=1 SV=1}	{jcu:105639610; - - - - -}	{At2g30020; KOG0698 Serine/threonine protein phosphatase T Signal transduction mechanisms ;}	{GO:0003824; NA}	{XM_010687221.2; PREDICTED: Beta vulgaris subsp. vulgaris Probable protein phosphatase 2C 25 (LOC104899930), mRNA}	{PF00481:Protein phosphatase 2C PF07228:Stage II sporulation protein E (SpoIIE)}
transcript_HQ_SAB_transcript23963/f9p0/1354	-1.2493	8.4399e-17	2.8151e-16	{XP_010687769.1; PREDICTED: Probable protein phosphatase 2C 27 [Beta vulgaris subsp. vulgaris]}	{sp|Q69QZ0|P2C27_ORYSJ; Probable protein phosphatase 2C 27 OS=Oryza sativa subsp. japonica GN=Os02g0799000 PE=2 SV=1}	{rcu:8275709; K14803 PTC2_3 protein phosphatase PTC2/3 3.1.3.16 -}	{At2g25620; KOG0698 Serine/threonine protein phosphatase T Signal transduction mechanisms ;}	{GO:0003824; NA}	{XM_010689467.2; PREDICTED: Beta vulgaris subsp. vulgaris Probable protein phosphatase 2C 27 (LOC104901842), mRNA}	{PF00481:Protein phosphatase 2C}
transcript_HQ_SAB_transcript23074/f2p0/1385	2.9617	8.7377e-08	1.966e-07	{KNA13245.1; hypothetical protein SOVF_118530 [Spinacia oleracea]}	{sp|Q93YW5|P2C58_ARATH; Probable protein phosphatase 2C 58 OS=Arabidopsis thaliana GN=At4g28400 PE=2 SV=1}	{cit:102608973; - - - - -}	{At3g15260; KOG0698 Serine/threonine protein phosphatase T Signal transduction mechanisms ;}	{GO:0003824; NA}	{XM_010690757.2; PREDICTED: Beta vulgaris subsp. vulgaris Probable protein phosphatase 2C 39 (LOC104902838), mRNA}	{PF07228:Stage II sporulation protein E (SpoIIE) PF00481:Protein phosphatase 2C}
transcript_HQ_SAB_transcript22843/f4p0/1429	-0.86464	3.7763e-05	7.1445e-05	{KNA12988.1; hypothetical protein SOVF_120940 [Spinacia oleracea]}	{sp|Q0WRB2|P2C73_ARATH; Probable protein phosphatase 2C 73 OS=Arabidopsis thaliana GN=PPC6-7 PE=2 SV=1}	{bvg:104890346; - - - - -}	{At3g05640; KOG0698 Serine/threonine protein phosphatase T Signal transduction mechanisms ;}	{GO:0003824; NA}	{XM_010675790.2; PREDICTED: Beta vulgaris subsp. vulgaris Probable protein phosphatase 2C 34 (LOC104890346), mRNA}	{PF00481:Protein phosphatase 2C PF07228:Stage II sporulation protein E (SpoIIE)}
transcript_HQ_SAB_transcript21387/f4p0/1549	-0.81957	7.6714e-09	1.8332e-08	{KNA07758.1; hypothetical protein SOVF_168630 [Spinacia oleracea]}	{sp|Q0JLP9|P2C06_ORYSJ; Probable protein phosphatase 2C 6 OS=Oryza sativa subsp. japonica GN=Os01g0583100 PE=1 SV=1}	{vvi:109121390; K14497 PP2C protein phosphatase 2C 3.1.3.16 ko04016; Environmental Information Processing; Signal transduction; MAPK signaling pathway - plant | ko04075; Environmental Information Processing; Signal transduction; Plant hormone signal transduction | ko04931; Human Diseases; Endocrine and metabolic diseases; Insulin resistance}	{At4g26080; KOG0698 Serine/threonine protein phosphatase T Signal transduction mechanisms ;}	{GO:0003824; NA GO:0005515; protein binding; molecular_function}	{XM_010690017.2; PREDICTED: Beta vulgaris subsp. vulgaris protein phosphatase 2C 56 (LOC104902294), mRNA}	{PF00481:Protein phosphatase 2C PF07228:Stage II sporulation protein E (SpoIIE) PF15966:F-box}
transcript_HQ_SAB_transcript21112/f23p0/1503	-3.2833	1.0203e-108	1.6564e-107	{XP_010685523.1; PREDICTED: Probable protein phosphatase 2C 25 [Beta vulgaris subsp. vulgaris]}	{sp|O80871|P2C25_ARATH; Probable protein phosphatase 2C 25 OS=Arabidopsis thaliana GN=At2g30020 PE=1 SV=1}	{jcu:105639610; - - - - -}	{At2g30020; KOG0698 Serine/threonine protein phosphatase T Signal transduction mechanisms ;}	{GO:0003824; NA}	{XM_010687221.2; PREDICTED: Beta vulgaris subsp. vulgaris Probable protein phosphatase 2C 25 (LOC104899930), mRNA}	{PF07228:Stage II sporulation protein E (SpoIIE) PF00481:Protein phosphatase 2C}
transcript_HQ_SAB_transcript21068/f2p0/1551	-0.59621	9.1714e-05	0.00016855	{XP_010670822.1; PREDICTED: Probable protein phosphatase 2C 60 [Beta vulgaris subsp. vulgaris]}	{sp|Q9SZ53|P2C60_ARATH; Probable protein phosphatase 2C 60 OS=Arabidopsis thaliana GN=At4g31860 PE=2 SV=1}	{bvg:104887778; K17499 PPM1G, PP2CG protein phosphatase 1G 3.1.3.16 -}	{At4g31860; KOG0698 Serine/threonine protein phosphatase T Signal transduction mechanisms ;}	{GO:0003824; NA}	{XM_010672520.2; PREDICTED: Beta vulgaris subsp. vulgaris Probable protein phosphatase 2C 60 (LOC104887778), mRNA}	{PF00481:Protein phosphatase 2C}
transcript_HQ_SAB_transcript20599/f2p0/1584	-1.674	1.2616e-15	4.0386e-15	{XP_010685523.1; PREDICTED: Probable protein phosphatase 2C 25 [Beta vulgaris subsp. vulgaris]}	{sp|O80871|P2C25_ARATH; Probable protein phosphatase 2C 25 OS=Arabidopsis thaliana GN=At2g30020 PE=1 SV=1}	{cic:CICLE_v10028590mg; - - - - -}	{At2g30020; KOG0698 Serine/threonine protein phosphatase T Signal transduction mechanisms ;}	{GO:0003824; NA}	{XM_010687221.2; PREDICTED: Beta vulgaris subsp. vulgaris Probable protein phosphatase 2C 25 (LOC104899930), mRNA}	{PF00481:Protein phosphatase 2C}
transcript_HQ_SAB_transcript20469/f3p0/1609	-1.3341	6.0851e-09	1.4625e-08	{XP_010685683.1; PREDICTED: Probable protein phosphatase 2C 24 [Beta vulgaris subsp. vulgaris]}	{sp|Q9FIF5|P2C78_ARATH; Probable protein phosphatase 2C 78 OS=Arabidopsis thaliana GN=SAG113 PE=2 SV=1}	{jcu:105629918; K14497 PP2C protein phosphatase 2C 3.1.3.16 ko04016; Environmental Information Processing; Signal transduction; MAPK signaling pathway - plant | ko04075; Environmental Information Processing; Signal transduction; Plant hormone signal transduction | ko04931; Human Diseases; Endocrine and metabolic diseases; Insulin resistance}	{At5g59220; KOG0698 Serine/threonine protein phosphatase T Signal transduction mechanisms ;}	{GO:0003824; NA}	{XM_010687381.2; PREDICTED: Beta vulgaris subsp. vulgaris Probable protein phosphatase 2C 24 (LOC104900051), mRNA}	{PF00481:Protein phosphatase 2C}
transcript_HQ_SAB_transcript20444/f5p0/1573	0.70848	1.2463e-05	2.4423e-05	{KNA17515.1; hypothetical protein SOVF_079170 isoform A [Spinacia oleracea]}	{sp|Q8RXV3|P2C59_ARATH; Probable protein phosphatase 2C 59 OS=Arabidopsis thaliana GN=WIN2 PE=1 SV=1}	{thj:104803865; K17506 PPM1L, PP2CE protein phosphatase 1L 3.1.3.16 -}	{At5g24940; KOG0698 Serine/threonine protein phosphatase T Signal transduction mechanisms ;}	{GO:0003824; NA}	{XM_019252300.1; PREDICTED: Beta vulgaris subsp. vulgaris Probable protein phosphatase 2C 59 (LOC104906000), transcript variant X1, mRNA}	{PF00481:Protein phosphatase 2C}
transcript_HQ_SAB_transcript19020/f2p0/1695	0.39033	0.0066461	0.010216	{KNA17202.1; hypothetical protein SOVF_082280 [Spinacia oleracea]}	{sp|Q9LME4|P2C09_ARATH; Probable protein phosphatase 2C 9 OS=Arabidopsis thaliana GN=At1g22280 PE=1 SV=1}	{gmx:100801722; K17506 PPM1L, PP2CE protein phosphatase 1L 3.1.3.16 -}	{At1g34750; KOG0698 Serine/threonine protein phosphatase T Signal transduction mechanisms ;}	{GO:0003824; NA}	{XM_010692194.2; PREDICTED: Beta vulgaris subsp. vulgaris Probable protein phosphatase 2C 9 (LOC104904024), transcript variant X1, mRNA}	{PF07228:Stage II sporulation protein E (SpoIIE) PF00481:Protein phosphatase 2C}
transcript_HQ_SAB_transcript18427/f2p0/1726	-1.7007	3.946e-36	2.2607e-35	{XP_010679445.1; PREDICTED: Probable protein phosphatase 2C 2 isoform X2 [Beta vulgaris subsp. vulgaris]}	{sp|Q9FYN7|P2C02_ORYSJ; Probable protein phosphatase 2C 2 OS=Oryza sativa subsp. japonica GN=Os01g0295700 PE=2 SV=1}	{bvg:104894812; K14803 PTC2_3 protein phosphatase PTC2/3 3.1.3.16 -}	{At3g62260; KOG0698 Serine/threonine protein phosphatase T Signal transduction mechanisms ;}	{GO:0003824; NA}	{XM_010681143.2; PREDICTED: Beta vulgaris subsp. vulgaris Probable protein phosphatase 2C 2 (LOC104894812), transcript variant X2, mRNA}	{PF00481:Protein phosphatase 2C}
transcript_HQ_SAB_transcript18064/f2p0/1748	-1.9456	9.8193e-22	3.8253e-21	{KNA15680.1; hypothetical protein SOVF_096010 [Spinacia oleracea]}	{sp|O81760|P2C63_ARATH; Probable protein phosphatase 2C 63 OS=Arabidopsis thaliana GN=At4g33920 PE=2 SV=1}	{jcu:105650748; - - - - -}	{At4g33920; KOG0700 Protein phosphatase 2C/pyruvate dehydrogenase (lipoamide) phosphatase T Signal transduction mechanisms ;}	{GO:0003824; NA}	{XM_010689202.2; PREDICTED: Beta vulgaris subsp. vulgaris Probable protein phosphatase 2C 63 (LOC104901613), mRNA}	{PF00481:Protein phosphatase 2C PF07228:Stage II sporulation protein E (SpoIIE)}
transcript_HQ_SAB_transcript17598/f20p0/1742	2.4021	8.9086e-66	8.6787e-65	{XP_010679444.1; PREDICTED: Probable protein phosphatase 2C 2 isoform X1 [Beta vulgaris subsp. vulgaris]}	{sp|Q9FYN7|P2C02_ORYSJ; Probable protein phosphatase 2C 2 OS=Oryza sativa subsp. japonica GN=Os01g0295700 PE=2 SV=1}	{bvg:104894812; K14803 PTC2_3 protein phosphatase PTC2/3 3.1.3.16 -}	{At3g62260; KOG0698 Serine/threonine protein phosphatase T Signal transduction mechanisms ;}	{GO:0003824; NA}	{XM_010681142.2; PREDICTED: Beta vulgaris subsp. vulgaris Probable protein phosphatase 2C 2 (LOC104894812), transcript variant X1, mRNA}	{PF00481:Protein phosphatase 2C}
transcript_HQ_SAB_transcript17294/f3p0/1788	-3.3492	7.0184e-71	7.3536e-70	{XP_010685683.1; PREDICTED: Probable protein phosphatase 2C 24 [Beta vulgaris subsp. vulgaris]}	{sp|Q9FIF5|P2C78_ARATH; Probable protein phosphatase 2C 78 OS=Arabidopsis thaliana GN=SAG113 PE=2 SV=1}	{jcu:105629918; K14497 PP2C protein phosphatase 2C 3.1.3.16 ko04016; Environmental Information Processing; Signal transduction; MAPK signaling pathway - plant | ko04075; Environmental Information Processing; Signal transduction; Plant hormone signal transduction | ko04931; Human Diseases; Endocrine and metabolic diseases; Insulin resistance}	{At5g59220; KOG0698 Serine/threonine protein phosphatase T Signal transduction mechanisms ;}	{GO:0003824; NA}	{XM_010687381.2; PREDICTED: Beta vulgaris subsp. vulgaris Probable protein phosphatase 2C 24 (LOC104900051), mRNA}	{PF00481:Protein phosphatase 2C}
transcript_HQ_SAB_transcript16531/f2p0/1839	-0.76976	0.0027523	0.0044138	{XP_010669214.1; PREDICTED: Probable protein phosphatase 2C 72 [Beta vulgaris subsp. vulgaris]}	{sp|Q9XGZ9|P2C72_ARATH; Probable protein phosphatase 2C 72 OS=Arabidopsis thaliana GN=At5g26010 PE=2 SV=2}	{bvg:104886463; - - - - -}	{At5g26010; KOG0698 Serine/threonine protein phosphatase T Signal transduction mechanisms ;}	{GO:0003824; NA}	{XM_010670912.2; PREDICTED: Beta vulgaris subsp. vulgaris Probable protein phosphatase 2C 72 (LOC104886463), mRNA}	{PF00481:Protein phosphatase 2C}
transcript_HQ_SAB_transcript16151/f2p0/1854	5.8936	9.1942e-204	3.6646e-202	{KNA15680.1; hypothetical protein SOVF_096010 [Spinacia oleracea]}	{sp|O81760|P2C63_ARATH; Probable protein phosphatase 2C 63 OS=Arabidopsis thaliana GN=At4g33920 PE=2 SV=1}	{jcu:105650748; - - - - -}	{At4g33920; KOG0700 Protein phosphatase 2C/pyruvate dehydrogenase (lipoamide) phosphatase T Signal transduction mechanisms ;}	{GO:0003824; NA}	{XM_010689202.2; PREDICTED: Beta vulgaris subsp. vulgaris Probable protein phosphatase 2C 63 (LOC104901613), mRNA}	{PF07228:Stage II sporulation protein E (SpoIIE) PF00481:Protein phosphatase 2C}
transcript_HQ_SAB_transcript15857/f2p0/1870	-3.635	0.00038499	0.00067066	{XP_010685683.1; PREDICTED: Probable protein phosphatase 2C 24 [Beta vulgaris subsp. vulgaris]}	{sp|Q9FIF5|P2C78_ARATH; Probable protein phosphatase 2C 78 OS=Arabidopsis thaliana GN=SAG113 PE=2 SV=1}	{jcu:105629918; K14497 PP2C protein phosphatase 2C 3.1.3.16 ko04016; Environmental Information Processing; Signal transduction; MAPK signaling pathway - plant | ko04075; Environmental Information Processing; Signal transduction; Plant hormone signal transduction | ko04931; Human Diseases; Endocrine and metabolic diseases; Insulin resistance}	{At5g59220; KOG0698 Serine/threonine protein phosphatase T Signal transduction mechanisms ;}	{NA}	{XM_010687381.2; PREDICTED: Beta vulgaris subsp. vulgaris Probable protein phosphatase 2C 24 (LOC104900051), mRNA}	{NA}
transcript_HQ_SAB_transcript15495/f9p0/1799	-2.502	3.0106e-22	1.1898e-21	{KNA15680.1; hypothetical protein SOVF_096010 [Spinacia oleracea]}	{sp|O81760|P2C63_ARATH; Probable protein phosphatase 2C 63 OS=Arabidopsis thaliana GN=At4g33920 PE=2 SV=1}	{jcu:105650748; - - - - -}	{At4g33920; KOG0700 Protein phosphatase 2C/pyruvate dehydrogenase (lipoamide) phosphatase T Signal transduction mechanisms ;}	{GO:0003824; NA}	{XM_010689202.2; PREDICTED: Beta vulgaris subsp. vulgaris Probable protein phosphatase 2C 63 (LOC104901613), mRNA}	{PF00481:Protein phosphatase 2C PF07228:Stage II sporulation protein E (SpoIIE)}
transcript_HQ_SAB_transcript15288/f3p0/1871	10.397	3.2354e-262	2.1943e-260	{XP_010685683.1; PREDICTED: Probable protein phosphatase 2C 24 [Beta vulgaris subsp. vulgaris]}	{sp|Q9FIF5|P2C78_ARATH; Probable protein phosphatase 2C 78 OS=Arabidopsis thaliana GN=SAG113 PE=2 SV=1}	{jcu:105629918; K14497 PP2C protein phosphatase 2C 3.1.3.16 ko04016; Environmental Information Processing; Signal transduction; MAPK signaling pathway - plant | ko04075; Environmental Information Processing; Signal transduction; Plant hormone signal transduction | ko04931; Human Diseases; Endocrine and metabolic diseases; Insulin resistance}	{At5g59220; KOG0698 Serine/threonine protein phosphatase T Signal transduction mechanisms ;}	{GO:0003824; NA}	{XM_010687381.2; PREDICTED: Beta vulgaris subsp. vulgaris Probable protein phosphatase 2C 24 (LOC104900051), mRNA}	{PF00481:Protein phosphatase 2C}
transcript_HQ_SAB_transcript15186/f2p0/1929	-2.2299	9.1041e-11	2.3845e-10	{XP_010674109.1; PREDICTED: Probable protein phosphatase 2C 5 [Beta vulgaris subsp. vulgaris]}	{sp|O80492|P2C05_ARATH; Probable protein phosphatase 2C 5 OS=Arabidopsis thaliana GN=At1g09160 PE=2 SV=1}	{bvg:104890355; - - - - -}	{At1g09160; KOG0698 Serine/threonine protein phosphatase T Signal transduction mechanisms ;}	{GO:0003824; NA}	{XM_010675807.2; PREDICTED: Beta vulgaris subsp. vulgaris Probable protein phosphatase 2C 5 (LOC104890355), mRNA}	{PF07228:Stage II sporulation protein E (SpoIIE) PF00481:Protein phosphatase 2C}
transcript_HQ_SAB_transcript13544/f2p0/2028	-1.6868	1.3613e-06	2.8498e-06	{KNA15314.1; hypothetical protein SOVF_098730 [Spinacia oleracea]}	{sp|Q0V7V2|P2C42_ARATH; Probable protein phosphatase 2C 42 OS=Arabidopsis thaliana GN=At3g17090 PE=2 SV=1}	{pmum:103323180; K01102 PDP pyruvate dehydrogenase phosphatase 3.1.3.43 -}	{At3g17090; KOG0700 Protein phosphatase 2C/pyruvate dehydrogenase (lipoamide) phosphatase T Signal transduction mechanisms ;}	{GO:0003824; NA}	{XM_008225154.2; PREDICTED: Prunus mume Probable protein phosphatase 2C 42 (LOC103323180), mRNA}	{PF00481:Protein phosphatase 2C}
transcript_HQ_SAB_transcript13341/f2p0/2028	-0.71146	6.2959e-05	0.00011705	{KNA10919.1; hypothetical protein SOVF_139870 [Spinacia oleracea]}	{sp|Q9LUS8|P2C40_ARATH; Probable protein phosphatase 2C 40 OS=Arabidopsis thaliana GN=At3g16560 PE=2 SV=1}	{mdm:103452924; - - - - -}	{At3g16560; KOG0700 Protein phosphatase 2C/pyruvate dehydrogenase (lipoamide) phosphatase T Signal transduction mechanisms ;}	{GO:0003824; NA}	{XM_010669015.2; PREDICTED: Beta vulgaris subsp. vulgaris Probable protein phosphatase 2C 40 (LOC104884373), transcript variant X2, mRNA}	{PF00481:Protein phosphatase 2C}
transcript_HQ_SAB_transcript10759/f3p0/2270	-0.96184	2.5599e-09	6.2667e-09	{XP_010690331.1; PREDICTED: Probable protein phosphatase 2C 60 [Beta vulgaris subsp. vulgaris]}	{sp|Q7XCJ7|P2C72_ORYSJ; Probable protein phosphatase 2C 72 OS=Oryza sativa subsp. japonica GN=Os10g0544900 PE=2 SV=1}	{obr:102715549; - - - - -}	{At5g66080; KOG0700 Protein phosphatase 2C/pyruvate dehydrogenase (lipoamide) phosphatase T Signal transduction mechanisms ;}	{GO:0003824; NA}	{XM_010692029.2; PREDICTED: Beta vulgaris subsp. vulgaris Probable protein phosphatase 2C 60 (LOC104903895), transcript variant X2, mRNA}	{PF00481:Protein phosphatase 2C}
transcript_HQ_SAB_transcript10508/f3p0/2281	1.3974	1.9719e-21	7.6151e-21	{XP_007044253.2; PREDICTED: Probable protein phosphatase 2C 15 [Theobroma cacao]}	{sp|Q9M9C6|P2C15_ARATH; Probable protein phosphatase 2C 15 OS=Arabidopsis thaliana GN=At1g68410 PE=2 SV=1}	{nnu:104602653; - - - - -}	{At1g68410; KOG0698 Serine/threonine protein phosphatase T Signal transduction mechanisms ;}	{GO:0003824; NA}	{XM_010683339.2; PREDICTED: Beta vulgaris subsp. vulgaris Probable protein phosphatase 2C 15 (LOC104896573), mRNA}	{PF00481:Protein phosphatase 2C}
transcript_HQ_SAB_transcript10480/f2p0/2327	6.6743	3.6908e-122	6.9594e-121	{XP_010670734.1; PREDICTED: Probable protein phosphatase 2C 22 [Beta vulgaris subsp. vulgaris]}	{sp|Q9SLA1|P2C22_ARATH; Probable protein phosphatase 2C 22 OS=Arabidopsis thaliana GN=At2g25620 PE=2 SV=1}	{bvg:104887717; K14803 PTC2_3 protein phosphatase PTC2/3 3.1.3.16 -}	{At2g25620; KOG0698 Serine/threonine protein phosphatase T Signal transduction mechanisms ;}	{GO:0003824; NA}	{XM_010672432.2; PREDICTED: Beta vulgaris subsp. vulgaris Probable protein phosphatase 2C 22 (LOC104887717), mRNA}	{PF00481:Protein phosphatase 2C}
transcript_HQ_SAB_transcript10093/f2p0/2315	-0.40908	0.0047426	0.0074228	{KNA22674.1; hypothetical protein SOVF_032320 [Spinacia oleracea]}	{sp|Q9CAJ0|P2C16_ARATH; Protein phosphatase 2C 16 OS=Arabidopsis thaliana GN=HAB1 PE=1 SV=1}	{cmo:103488507; K14497 PP2C protein phosphatase 2C 3.1.3.16 ko04016; Environmental Information Processing; Signal transduction; MAPK signaling pathway - plant | ko04075; Environmental Information Processing; Signal transduction; Plant hormone signal transduction | ko04931; Human Diseases; Endocrine and metabolic diseases; Insulin resistance}	{At1g72770; KOG0698 Serine/threonine protein phosphatase T Signal transduction mechanisms ;}	{GO:0003824; NA}	{XM_010698249.2; PREDICTED: Beta vulgaris subsp. vulgaris Probable protein phosphatase 2C 50 (LOC104909063), mRNA}	{PF07228:Stage II sporulation protein E (SpoIIE) PF00481:Protein phosphatase 2C}
transcript_HQ_BAB_transcript9803/f2p0/2593	2.9733	3.6318e-13	1.0575e-12	{XP_010690331.1; PREDICTED: Probable protein phosphatase 2C 60 [Beta vulgaris subsp. vulgaris]}	{sp|Q10S32|P2C28_ORYSJ; Probable protein phosphatase 2C 28 OS=Oryza sativa subsp. japonica GN=Os03g0137200 PE=2 SV=1}	{pper:PRUPE_ppa006747mg; K01102 PDP pyruvate dehydrogenase phosphatase 3.1.3.43 -}	{At4g38520; KOG0700 Protein phosphatase 2C/pyruvate dehydrogenase (lipoamide) phosphatase T Signal transduction mechanisms ;}	{GO:0003824; NA}	{XM_010692030.2; PREDICTED: Beta vulgaris subsp. vulgaris Probable protein phosphatase 2C 60 (LOC104903895), transcript variant X1, mRNA}	{PF00481:Protein phosphatase 2C PF07228:Stage II sporulation protein E (SpoIIE)}
transcript_HQ_BAB_transcript945/f2p0/4395	4.3255	1.8725e-15	5.9557e-15	{XP_010669214.1; PREDICTED: Probable protein phosphatase 2C 72 [Beta vulgaris subsp. vulgaris]}	{sp|Q9XGZ9|P2C72_ARATH; Probable protein phosphatase 2C 72 OS=Arabidopsis thaliana GN=At5g26010 PE=2 SV=2}	{bvg:104886463; - - - - -}	{At5g26010; KOG0698 Serine/threonine protein phosphatase T Signal transduction mechanisms ;}	{GO:0003824; NA}	{XM_010670912.2; PREDICTED: Beta vulgaris subsp. vulgaris Probable protein phosphatase 2C 72 (LOC104886463), mRNA}	{PF00481:Protein phosphatase 2C}
transcript_HQ_BAB_transcript9175/f2p0/2656	4.7022	2.3653e-63	2.228e-62	{XP_010690331.1; PREDICTED: Probable protein phosphatase 2C 60 [Beta vulgaris subsp. vulgaris]}	{sp|Q10S32|P2C28_ORYSJ; Probable protein phosphatase 2C 28 OS=Oryza sativa subsp. japonica GN=Os03g0137200 PE=2 SV=1}	{pper:PRUPE_ppa006747mg; K01102 PDP pyruvate dehydrogenase phosphatase 3.1.3.43 -}	{At4g38520; KOG0700 Protein phosphatase 2C/pyruvate dehydrogenase (lipoamide) phosphatase T Signal transduction mechanisms ;}	{GO:0003824; NA}	{XM_010692030.2; PREDICTED: Beta vulgaris subsp. vulgaris Probable protein phosphatase 2C 60 (LOC104903895), transcript variant X1, mRNA}	{PF00481:Protein phosphatase 2C PF07228:Stage II sporulation protein E (SpoIIE)}
transcript_HQ_BAB_transcript9048/f3p0/2678	Inf	2.7017e-13	7.9122e-13	{XP_010690331.1; PREDICTED: Probable protein phosphatase 2C 60 [Beta vulgaris subsp. vulgaris]}	{sp|Q10S32|P2C28_ORYSJ; Probable protein phosphatase 2C 28 OS=Oryza sativa subsp. japonica GN=Os03g0137200 PE=2 SV=1}	{pper:PRUPE_ppa006747mg; K01102 PDP pyruvate dehydrogenase phosphatase 3.1.3.43 -}	{At4g38520; KOG0700 Protein phosphatase 2C/pyruvate dehydrogenase (lipoamide) phosphatase T Signal transduction mechanisms ;}	{GO:0003824; NA}	{XM_010692030.2; PREDICTED: Beta vulgaris subsp. vulgaris Probable protein phosphatase 2C 60 (LOC104903895), transcript variant X1, mRNA}	{PF07228:Stage II sporulation protein E (SpoIIE) PF00481:Protein phosphatase 2C}
transcript_HQ_BAB_transcript8744/f4p0/2709	-0.60503	0.00024394	0.00043276	{XP_010689685.1; PREDICTED: Probable protein phosphatase 2C 52 [Beta vulgaris subsp. vulgaris]}	{sp|Q8GY60|P2C52_ARATH; Probable protein phosphatase 2C 52 OS=Arabidopsis thaliana GN=At4g03415 PE=2 SV=1}	{vvi:100258592; - - - - -}	{At1g03590; KOG0698 Serine/threonine protein phosphatase T Signal transduction mechanisms ;}	{GO:0003824; NA}	{XM_010691383.2; PREDICTED: Beta vulgaris subsp. vulgaris Probable protein phosphatase 2C 52 (LOC104903359), mRNA}	{PF00481:Protein phosphatase 2C}
transcript_HQ_BAB_transcript8003/f4p0/2893	0.91068	0.0033742	0.0053648	{XP_016703028.1; PREDICTED: Probable protein phosphatase 2C 55 isoform X2 [Gossypium hirsutum]}	{sp|Q9SUK9|P2C55_ARATH; Probable protein phosphatase 2C 55 OS=Arabidopsis thaliana GN=At4g16580 PE=2 SV=2}	{gra:105785141; K17508 PTC7, PPTC7 protein phosphatase PTC7 3.1.3.16 -}	{At4g16580; KOG1379 Serine/threonine protein phosphatase T Signal transduction mechanisms ;}	{GO:0003824; NA}	{XM_007017422.2; PREDICTED: Theobroma cacao Probable protein phosphatase 2C 55 (LOC18591350), transcript variant X5, mRNA}	{PF07228:Stage II sporulation protein E (SpoIIE) PF00481:Protein phosphatase 2C}
transcript_HQ_BAB_transcript7941/f3p0/2837	1.5889	2.533e-09	6.2023e-09	{XP_010685766.1; PREDICTED: Probable protein phosphatase 2C 23 [Beta vulgaris subsp. vulgaris]}	{sp|Q9ZV25|P2C23_ARATH; Probable protein phosphatase 2C 23 OS=Arabidopsis thaliana GN=PLL4 PE=2 SV=1}	{nnu:104594549; - - - - -}	{At2g28890; KOG0700 Protein phosphatase 2C/pyruvate dehydrogenase (lipoamide) phosphatase T Signal transduction mechanisms ;}	{GO:0003824; NA}	{XM_010687464.2; PREDICTED: Beta vulgaris subsp. vulgaris Probable protein phosphatase 2C 23 (LOC104900119), mRNA}	{PF00481:Protein phosphatase 2C PF07228:Stage II sporulation protein E (SpoIIE)}
transcript_HQ_BAB_transcript7909/f2p0/2833	1.609	3.535e-05	6.704e-05	{XP_015576562.1; PREDICTED: Probable protein phosphatase 2C 55 isoform X2 [Ricinus communis]}	{sp|Q9SUK9|P2C55_ARATH; Probable protein phosphatase 2C 55 OS=Arabidopsis thaliana GN=At4g16580 PE=2 SV=2}	{jcu:105633760; K17508 PTC7, PPTC7 protein phosphatase PTC7 3.1.3.16 -}	{At4g16580; KOG1379 Serine/threonine protein phosphatase T Signal transduction mechanisms ;}	{GO:0003824; NA}	{XM_007017422.2; PREDICTED: Theobroma cacao Probable protein phosphatase 2C 55 (LOC18591350), transcript variant X5, mRNA}	{PF07228:Stage II sporulation protein E (SpoIIE)}
transcript_HQ_BAB_transcript7199/f7p0/2893	2.5241	0.00077472	0.001315	{KNA09453.1; hypothetical protein SOVF_153500, partial [Spinacia oleracea]}	{sp|Q93V88|P2C62_ARATH; Probable protein phosphatase 2C 62 OS=Arabidopsis thaliana GN=At4g33500 PE=2 SV=1}	{vvi:100262272; - - - - -}	{At4g33500_1; KOG1379 Serine/threonine protein phosphatase T Signal transduction mechanisms ;}	{GO:0003824; NA}	{XM_010668562.2; PREDICTED: Beta vulgaris subsp. vulgaris Probable protein phosphatase 2C 62 (LOC104883980), transcript variant X2, mRNA}	{PF00481:Protein phosphatase 2C PF07228:Stage II sporulation protein E (SpoIIE)}
transcript_HQ_BAB_transcript5300/f2p0/3255	2.3632	8.6393e-20	3.173e-19	{KNA22674.1; hypothetical protein SOVF_032320 [Spinacia oleracea]}	{sp|Q9CAJ0|P2C16_ARATH; Protein phosphatase 2C 16 OS=Arabidopsis thaliana GN=HAB1 PE=1 SV=1}	{cmo:103488507; K14497 PP2C protein phosphatase 2C 3.1.3.16 ko04016; Environmental Information Processing; Signal transduction; MAPK signaling pathway - plant | ko04075; Environmental Information Processing; Signal transduction; Plant hormone signal transduction | ko04931; Human Diseases; Endocrine and metabolic diseases; Insulin resistance}	{At1g72770; KOG0698 Serine/threonine protein phosphatase T Signal transduction mechanisms ;}	{GO:0003824; NA}	{XM_010698249.2; PREDICTED: Beta vulgaris subsp. vulgaris Probable protein phosphatase 2C 50 (LOC104909063), mRNA}	{PF07228:Stage II sporulation protein E (SpoIIE) PF00481:Protein phosphatase 2C}
transcript_HQ_BAB_transcript2905/f2p0/3691	2.4125	4.487e-32	2.3324e-31	{KNA15680.1; hypothetical protein SOVF_096010 [Spinacia oleracea]}	{sp|O81760|P2C63_ARATH; Probable protein phosphatase 2C 63 OS=Arabidopsis thaliana GN=At4g33920 PE=2 SV=1}	{nta:107771588; - - - - -}	{At4g33920; KOG0700 Protein phosphatase 2C/pyruvate dehydrogenase (lipoamide) phosphatase T Signal transduction mechanisms ;}	{GO:0003824; NA}	{XM_010689202.2; PREDICTED: Beta vulgaris subsp. vulgaris Probable protein phosphatase 2C 63 (LOC104901613), mRNA}	{PF00481:Protein phosphatase 2C}
transcript_HQ_BAB_transcript19840/f3p0/1333	13.351	3.779e-175	1.1567e-173	{KNA13245.1; hypothetical protein SOVF_118530 [Spinacia oleracea]}	{sp|Q93YW5|P2C58_ARATH; Probable protein phosphatase 2C 58 OS=Arabidopsis thaliana GN=At4g28400 PE=2 SV=1}	{cit:102608973; - - - - -}	{At3g15260; KOG0698 Serine/threonine protein phosphatase T Signal transduction mechanisms ;}	{GO:0003824; NA}	{XM_010690757.2; PREDICTED: Beta vulgaris subsp. vulgaris Probable protein phosphatase 2C 39 (LOC104902838), mRNA}	{PF00481:Protein phosphatase 2C PF07228:Stage II sporulation protein E (SpoIIE)}
transcript_HQ_BAB_transcript19769/f2p0/1338	-0.91487	9.9269e-08	2.224e-07	{KNA13245.1; hypothetical protein SOVF_118530 [Spinacia oleracea]}	{sp|Q93YW5|P2C58_ARATH; Probable protein phosphatase 2C 58 OS=Arabidopsis thaliana GN=At4g28400 PE=2 SV=1}	{cit:102608973; - - - - -}	{At3g15260; KOG0698 Serine/threonine protein phosphatase T Signal transduction mechanisms ;}	{GO:0003824; NA}	{XM_010690757.2; PREDICTED: Beta vulgaris subsp. vulgaris Probable protein phosphatase 2C 39 (LOC104902838), mRNA}	{PF00481:Protein phosphatase 2C PF07228:Stage II sporulation protein E (SpoIIE)}
transcript_HQ_BAB_transcript19533/f3p0/1407	2.3897	8.9438e-26	3.9454e-25	{KNA10479.1; hypothetical protein SOVF_144130 [Spinacia oleracea]}	{sp|Q9SZ53|P2C60_ARATH; Probable protein phosphatase 2C 60 OS=Arabidopsis thaliana GN=At4g31860 PE=2 SV=1}	{cann:107871708; - - - - -}	{At4g31860; KOG0698 Serine/threonine protein phosphatase T Signal transduction mechanisms ;}	{GO:0003824; NA}	{XM_010697162.2; PREDICTED: Beta vulgaris subsp. vulgaris Probable protein phosphatase 2C 21 (LOC104908092), transcript variant X5, mRNA}	{PF00481:Protein phosphatase 2C PF07228:Stage II sporulation protein E (SpoIIE)}
transcript_HQ_BAB_transcript19454/f2p0/1415	0.4188	0.005978	0.0092352	{XP_010671484.1; PREDICTED: Probable protein phosphatase 2C 8 isoform X1 [Beta vulgaris subsp. vulgaris]}	{sp|Q5SN75|P2C08_ORYSJ; Probable protein phosphatase 2C 8 OS=Oryza sativa subsp. japonica GN=Os01g0656200 PE=2 SV=1}	{bvg:104888273; K14497 PP2C protein phosphatase 2C 3.1.3.16 ko04016; Environmental Information Processing; Signal transduction; MAPK signaling pathway - plant | ko04075; Environmental Information Processing; Signal transduction; Plant hormone signal transduction | ko04931; Human Diseases; Endocrine and metabolic diseases; Insulin resistance}	{At3g11410; KOG0698 Serine/threonine protein phosphatase T Signal transduction mechanisms ;}	{GO:0003824; NA}	{NA}	{PF07228:Stage II sporulation protein E (SpoIIE) PF00481:Protein phosphatase 2C}
transcript_HQ_BAB_transcript18970/f13p0/1477	4.8462	6.7935e-85	8.67e-84	{XP_010685523.1; PREDICTED: Probable protein phosphatase 2C 25 [Beta vulgaris subsp. vulgaris]}	{sp|O80871|P2C25_ARATH; Probable protein phosphatase 2C 25 OS=Arabidopsis thaliana GN=At2g30020 PE=1 SV=1}	{jcu:105639610; - - - - -}	{At2g30020; KOG0698 Serine/threonine protein phosphatase T Signal transduction mechanisms ;}	{GO:0003824; NA}	{XM_010687221.2; PREDICTED: Beta vulgaris subsp. vulgaris Probable protein phosphatase 2C 25 (LOC104899930), mRNA}	{PF07228:Stage II sporulation protein E (SpoIIE) PF00481:Protein phosphatase 2C}
transcript_HQ_BAB_transcript18843/f4p0/1540	3.623	1.6581e-31	8.4948e-31	{XP_010685523.1; PREDICTED: Probable protein phosphatase 2C 25 [Beta vulgaris subsp. vulgaris]}	{sp|O80871|P2C25_ARATH; Probable protein phosphatase 2C 25 OS=Arabidopsis thaliana GN=At2g30020 PE=1 SV=1}	{jcu:105639610; - - - - -}	{At2g30020; KOG0698 Serine/threonine protein phosphatase T Signal transduction mechanisms ;}	{GO:0003824; NA}	{XM_010687221.2; PREDICTED: Beta vulgaris subsp. vulgaris Probable protein phosphatase 2C 25 (LOC104899930), mRNA}	{PF07228:Stage II sporulation protein E (SpoIIE) PF00481:Protein phosphatase 2C}
transcript_HQ_BAB_transcript1816/f2p0/4009	2.0826	5.2155e-22	2.049e-21	{KNA05522.1; hypothetical protein SOVF_189470 [Spinacia oleracea]}	{sp|Q8RXY0|Y3333_ARATH; Probable inactive protein kinase At3g63330 OS=Arabidopsis thaliana GN=At3g63330 PE=2 SV=1}	{bvg:104894555; - - - - -}	{At3g63340_1; KOG0698 Serine/threonine protein phosphatase T Signal transduction mechanisms ;}	{GO:0005524; ATP binding; molecular_function GO:0006468; protein phosphorylation; biological_process GO:0003824; NA GO:0004672; protein kinase activity; molecular_function}	{XR_790231.2; PREDICTED: Beta vulgaris subsp. vulgaris Probable protein phosphatase 2C 51 (LOC104894555), transcript variant X1, misc_RNA}	{PF07714:Protein tyrosine kinase PF00481:Protein phosphatase 2C PF00069:Protein kinase domain}
transcript_HQ_BAB_transcript18030/f11p0/1649	0.51935	0.00041816	0.00072648	{XP_010680832.1; PREDICTED: Probable protein phosphatase 2C 80 [Beta vulgaris subsp. vulgaris]}	{sp|Q9SUK9|P2C55_ARATH; Probable protein phosphatase 2C 55 OS=Arabidopsis thaliana GN=At4g16580 PE=2 SV=2}	{pper:PRUPE_ppa005911mg; K17508 PTC7, PPTC7 protein phosphatase PTC7 3.1.3.16 -}	{At4g16580; KOG1379 Serine/threonine protein phosphatase T Signal transduction mechanisms ;}	{GO:0003824; NA}	{XM_010682531.2; PREDICTED: Beta vulgaris subsp. vulgaris Probable protein phosphatase 2C 80 (LOC104895887), transcript variant X2, mRNA}	{PF00481:Protein phosphatase 2C PF07228:Stage II sporulation protein E (SpoIIE)}
transcript_HQ_BAB_transcript1760/f2p0/4026	1.2722	1.5976e-11	4.3302e-11	{KNA05522.1; hypothetical protein SOVF_189470 [Spinacia oleracea]}	{sp|Q8RXY0|Y3333_ARATH; Probable inactive protein kinase At3g63330 OS=Arabidopsis thaliana GN=At3g63330 PE=2 SV=1}	{bvg:104894555; - - - - -}	{At3g63340_1; KOG0698 Serine/threonine protein phosphatase T Signal transduction mechanisms ;}	{GO:0004672; protein kinase activity; molecular_function GO:0003824; NA GO:0006468; protein phosphorylation; biological_process GO:0005524; ATP binding; molecular_function}	{XR_790231.2; PREDICTED: Beta vulgaris subsp. vulgaris Probable protein phosphatase 2C 51 (LOC104894555), transcript variant X1, misc_RNA}	{PF00069:Protein kinase domain PF00481:Protein phosphatase 2C PF07714:Protein tyrosine kinase}
transcript_HQ_BAB_transcript17364/f2p0/1752	-1.3357	6.5776e-13	1.8977e-12	{XP_010670822.1; PREDICTED: Probable protein phosphatase 2C 60 [Beta vulgaris subsp. vulgaris]}	{sp|Q9SZ53|P2C60_ARATH; Probable protein phosphatase 2C 60 OS=Arabidopsis thaliana GN=At4g31860 PE=2 SV=1}	{bvg:104887778; K17499 PPM1G, PP2CG protein phosphatase 1G 3.1.3.16 -}	{At4g31860; KOG0698 Serine/threonine protein phosphatase T Signal transduction mechanisms ;}	{GO:0003824; NA}	{XM_010672520.2; PREDICTED: Beta vulgaris subsp. vulgaris Probable protein phosphatase 2C 60 (LOC104887778), mRNA}	{PF00481:Protein phosphatase 2C}
transcript_HQ_BAB_transcript17178/f5p0/1724	Inf	9.3633e-40	5.7698e-39	{XP_010669214.1; PREDICTED: Probable protein phosphatase 2C 72 [Beta vulgaris subsp. vulgaris]}	{sp|Q9XGZ9|P2C72_ARATH; Probable protein phosphatase 2C 72 OS=Arabidopsis thaliana GN=At5g26010 PE=2 SV=2}	{bvg:104886463; - - - - -}	{At5g26010; KOG0698 Serine/threonine protein phosphatase T Signal transduction mechanisms ;}	{GO:0003824; NA}	{XM_010670912.2; PREDICTED: Beta vulgaris subsp. vulgaris Probable protein phosphatase 2C 72 (LOC104886463), mRNA}	{PF00481:Protein phosphatase 2C}
transcript_HQ_BAB_transcript16873/f2p0/1816	4.0989	4.7424e-36	2.7134e-35	{XP_010671495.1; PREDICTED: Probable protein phosphatase 2C 76 [Beta vulgaris subsp. vulgaris]}	{sp|Q94AT1|P2C76_ARATH; Probable protein phosphatase 2C 76 OS=Arabidopsis thaliana GN=At5g53140 PE=2 SV=1}	{bvg:104888280; K17506 PPM1L, PP2CE protein phosphatase 1L 3.1.3.16 -}	{At5g53140; KOG0698 Serine/threonine protein phosphatase T Signal transduction mechanisms ;}	{GO:0003824; NA GO:0007423; sensory organ development; biological_process GO:0007219; Notch signaling pathway; biological_process}	{XM_010673193.2; PREDICTED: Beta vulgaris subsp. vulgaris Probable protein phosphatase 2C 76 (LOC104888280), mRNA}	{PF00481:Protein phosphatase 2C PF15952:Enhancer of split M4 family}
transcript_HQ_BAB_transcript16369/f3p0/1867	0.61153	5.5654e-05	0.00010396	{XP_010674109.1; PREDICTED: Probable protein phosphatase 2C 5 [Beta vulgaris subsp. vulgaris]}	{sp|O80492|P2C05_ARATH; Probable protein phosphatase 2C 5 OS=Arabidopsis thaliana GN=At1g09160 PE=2 SV=1}	{bvg:104890355; - - - - -}	{At1g09160; KOG0698 Serine/threonine protein phosphatase T Signal transduction mechanisms ;}	{GO:0003824; NA}	{XM_010675807.2; PREDICTED: Beta vulgaris subsp. vulgaris Probable protein phosphatase 2C 5 (LOC104890355), mRNA}	{PF07228:Stage II sporulation protein E (SpoIIE) PF00481:Protein phosphatase 2C}
transcript_HQ_BAB_transcript15601/f4p0/1952	-1.804	0.0042827	0.0067306	{XP_010669220.1; PREDICTED: Probable protein phosphatase 2C 12 [Beta vulgaris subsp. vulgaris]}	{sp|Q6Z8B9|P2C12_ORYSJ; Probable protein phosphatase 2C 12 OS=Oryza sativa subsp. japonica GN=Os02g0224100 PE=2 SV=1}	{bvg:104886469; - - - - -}	{At5g26010; KOG0698 Serine/threonine protein phosphatase T Signal transduction mechanisms ;}	{GO:0003824; NA}	{NA}	{PF00481:Protein phosphatase 2C}
transcript_HQ_BAB_transcript15266/f5p0/1950	1.0479	1.8404e-05	3.5624e-05	{KNA10919.1; hypothetical protein SOVF_139870 [Spinacia oleracea]}	{sp|Q9LUS8|P2C40_ARATH; Probable protein phosphatase 2C 40 OS=Arabidopsis thaliana GN=At3g16560 PE=2 SV=1}	{mdm:103452924; - - - - -}	{At3g16560; KOG0700 Protein phosphatase 2C/pyruvate dehydrogenase (lipoamide) phosphatase T Signal transduction mechanisms ;}	{GO:0003824; NA}	{XM_010669016.2; PREDICTED: Beta vulgaris subsp. vulgaris Probable protein phosphatase 2C 40 (LOC104884373), transcript variant X3, mRNA}	{PF00481:Protein phosphatase 2C}
transcript_HQ_BAB_transcript14818/f3p0/2043	-1.8945	2.7116e-33	1.4468e-32	{KNA15680.1; hypothetical protein SOVF_096010 [Spinacia oleracea]}	{sp|O81760|P2C63_ARATH; Probable protein phosphatase 2C 63 OS=Arabidopsis thaliana GN=At4g33920 PE=2 SV=1}	{jcu:105650748; - - - - -}	{At4g33920; KOG0700 Protein phosphatase 2C/pyruvate dehydrogenase (lipoamide) phosphatase T Signal transduction mechanisms ;}	{GO:0003824; NA}	{XM_010689202.2; PREDICTED: Beta vulgaris subsp. vulgaris Probable protein phosphatase 2C 63 (LOC104901613), mRNA}	{PF07228:Stage II sporulation protein E (SpoIIE) PF00481:Protein phosphatase 2C}
transcript_HQ_BAB_transcript14146/f2p0/2104	1.5869	1.0785e-09	2.6852e-09	{KNA10919.1; hypothetical protein SOVF_139870 [Spinacia oleracea]}	{sp|Q9LUS8|P2C40_ARATH; Probable protein phosphatase 2C 40 OS=Arabidopsis thaliana GN=At3g16560 PE=2 SV=1}	{mdm:103452924; - - - - -}	{At3g16560; KOG0700 Protein phosphatase 2C/pyruvate dehydrogenase (lipoamide) phosphatase T Signal transduction mechanisms ;}	{GO:0003824; NA}	{XM_010669016.2; PREDICTED: Beta vulgaris subsp. vulgaris Probable protein phosphatase 2C 40 (LOC104884373), transcript variant X3, mRNA}	{PF00481:Protein phosphatase 2C}
transcript_HQ_BAB_transcript13016/f3p0/2218	4.5218	1.197e-26	5.4031e-26	{XP_010671495.1; PREDICTED: Probable protein phosphatase 2C 76 [Beta vulgaris subsp. vulgaris]}	{sp|Q94AT1|P2C76_ARATH; Probable protein phosphatase 2C 76 OS=Arabidopsis thaliana GN=At5g53140 PE=2 SV=1}	{bvg:104888280; K17506 PPM1L, PP2CE protein phosphatase 1L 3.1.3.16 -}	{At5g53140; KOG0698 Serine/threonine protein phosphatase T Signal transduction mechanisms ;}	{GO:0003824; NA GO:0007423; sensory organ development; biological_process GO:0007219; Notch signaling pathway; biological_process}	{XM_010673193.2; PREDICTED: Beta vulgaris subsp. vulgaris Probable protein phosphatase 2C 76 (LOC104888280), mRNA}	{PF00481:Protein phosphatase 2C PF15952:Enhancer of split M4 family}
transcript_HQ_BAB_transcript11525/f3p0/2379	2.6059	7.0974e-32	3.6741e-31	{XP_010690331.1; PREDICTED: Probable protein phosphatase 2C 60 [Beta vulgaris subsp. vulgaris]}	{sp|Q10S32|P2C28_ORYSJ; Probable protein phosphatase 2C 28 OS=Oryza sativa subsp. japonica GN=Os03g0137200 PE=2 SV=1}	{pper:PRUPE_ppa006747mg; K01102 PDP pyruvate dehydrogenase phosphatase 3.1.3.43 -}	{At4g38520; KOG0700 Protein phosphatase 2C/pyruvate dehydrogenase (lipoamide) phosphatase T Signal transduction mechanisms ;}	{GO:0003824; NA}	{XM_010692030.2; PREDICTED: Beta vulgaris subsp. vulgaris Probable protein phosphatase 2C 60 (LOC104903895), transcript variant X1, mRNA}	{PF00481:Protein phosphatase 2C PF07228:Stage II sporulation protein E (SpoIIE)}
transcript_HQ_BAB_transcript11087/f2p0/2433	-2.8799	3.821e-10	9.7135e-10	{XP_010685766.1; PREDICTED: Probable protein phosphatase 2C 23 [Beta vulgaris subsp. vulgaris]}	{sp|Q9ZV25|P2C23_ARATH; Probable protein phosphatase 2C 23 OS=Arabidopsis thaliana GN=PLL4 PE=2 SV=1}	{nnu:104593809; - - - - -}	{At2g28890; KOG0700 Protein phosphatase 2C/pyruvate dehydrogenase (lipoamide) phosphatase T Signal transduction mechanisms ;}	{GO:0003824; NA}	{XM_010687464.2; PREDICTED: Beta vulgaris subsp. vulgaris Probable protein phosphatase 2C 23 (LOC104900119), mRNA}	{PF00481:Protein phosphatase 2C PF07228:Stage II sporulation protein E (SpoIIE)}
transcript_HQ_BAB_transcript10610/f3p0/2535	Inf	7.1493e-242	3.8089e-240	{XP_010670734.1; PREDICTED: Probable protein phosphatase 2C 22 [Beta vulgaris subsp. vulgaris]}	{sp|Q9SLA1|P2C22_ARATH; Probable protein phosphatase 2C 22 OS=Arabidopsis thaliana GN=At2g25620 PE=2 SV=1}	{bvg:104887717; K14803 PTC2_3 protein phosphatase PTC2/3 3.1.3.16 -}	{At2g25620; KOG0698 Serine/threonine protein phosphatase T Signal transduction mechanisms ;}	{GO:0003824; NA}	{XM_010672432.2; PREDICTED: Beta vulgaris subsp. vulgaris Probable protein phosphatase 2C 22 (LOC104887717), mRNA}	{PF00481:Protein phosphatase 2C}
transcript_HQ_SAB_transcript20947/f2p0/1577	1.0194	7.8723e-10	1.9726e-09	{XP_010680996.1; PREDICTED: serine/threonine-protein kinase SAPK2 [Beta vulgaris subsp. vulgaris]}	{sp|Q75LR7|SAPK1_ORYSJ; Serine/threonine-protein kinase SAPK1 OS=Oryza sativa subsp. japonica GN=SAPK1 PE=1 SV=1}	{vvi:100260262; K14498 SNRK2 serine/threonine-protein kinase SRK2 2.7.11.1 ko04016; Environmental Information Processing; Signal transduction; MAPK signaling pathway - plant | ko04075; Environmental Information Processing; Signal transduction; Plant hormone signal transduction}	{At1g78290; KOG0583 Serine/threonine protein kinase T Signal transduction mechanisms ;}	{GO:0006468; protein phosphorylation; biological_process GO:0016020; membrane; cellular_component GO:0004672; protein kinase activity; molecular_function GO:0016773; phosphotransferase activity, alcohol group as acceptor; molecular_function GO:0005524; ATP binding; molecular_function}	{XM_010682694.2; PREDICTED: Beta vulgaris subsp. vulgaris serine/threonine-protein kinase SAPK2 (LOC104896021), mRNA}	{PF06293:Lipopolysaccharide kinase (Kdo/WaaP) family PF00069:Protein kinase domain PF07714:Protein tyrosine kinase}
transcript_HQ_SAB_transcript20301/f2p0/1618	-2.0164	7.5109e-42	4.839e-41	{XP_010691013.1; PREDICTED: serine/threonine-protein kinase SRK2E isoform X2 [Beta vulgaris subsp. vulgaris]}	{sp|Q940H6|SRK2E_ARATH; Serine/threonine-protein kinase SRK2E OS=Arabidopsis thaliana GN=SRK2E PE=1 SV=1}	{thj:104804368; K14498 SNRK2 serine/threonine-protein kinase SRK2 2.7.11.1 ko04016; Environmental Information Processing; Signal transduction; MAPK signaling pathway - plant | ko04075; Environmental Information Processing; Signal transduction; Plant hormone signal transduction}	{At4g33950; KOG0583 Serine/threonine protein kinase T Signal transduction mechanisms ;}	{GO:0005524; ATP binding; molecular_function GO:0004672; protein kinase activity; molecular_function GO:0006468; protein phosphorylation; biological_process}	{XM_010692711.2; PREDICTED: Beta vulgaris subsp. vulgaris serine/threonine-protein kinase SRK2E (LOC104904459), transcript variant X2, mRNA}	{PF00069:Protein kinase domain PF07714:Protein tyrosine kinase}
transcript_HQ_SAB_transcript17897/f5p0/1736	-0.45454	0.0015259	0.0025224	{XP_010675155.1; PREDICTED: serine/threonine-protein kinase SRK2H [Beta vulgaris subsp. vulgaris]}	{sp|Q7XQP4|SAPK7_ORYSJ; Serine/threonine-protein kinase SAPK7 OS=Oryza sativa subsp. japonica GN=SAPK7 PE=2 SV=2}	{bvg:104891194; K14498 SNRK2 serine/threonine-protein kinase SRK2 2.7.11.1 ko04016; Environmental Information Processing; Signal transduction; MAPK signaling pathway - plant | ko04075; Environmental Information Processing; Signal transduction; Plant hormone signal transduction}	{At1g10940; KOG0583 Serine/threonine protein kinase T Signal transduction mechanisms ;}	{GO:0006359; regulation of transcription from RNA polymerase III promoter; biological_process GO:0005524; ATP binding; molecular_function GO:0006468; protein phosphorylation; biological_process GO:0004672; protein kinase activity; molecular_function}	{XM_010676853.2; PREDICTED: Beta vulgaris subsp. vulgaris serine/threonine-protein kinase SRK2H (LOC104891194), mRNA}	{PF11705:DNA-directed RNA polymerase III subunit Rpc31 PF07714:Protein tyrosine kinase PF00069:Protein kinase domain}
transcript_HQ_SAB_transcript16305/f3p0/1853	0.62258	0.00075207	0.0012781	{XP_010680446.1; PREDICTED: serine/threonine-protein kinase SRK2I [Beta vulgaris subsp. vulgaris]}	{sp|Q39193|SRK2I_ARATH; Serine/threonine-protein kinase SRK2I OS=Arabidopsis thaliana GN=SRK2I PE=1 SV=1}	{cit:102610632; K14498 SNRK2 serine/threonine-protein kinase SRK2 2.7.11.1 ko04016; Environmental Information Processing; Signal transduction; MAPK signaling pathway - plant | ko04075; Environmental Information Processing; Signal transduction; Plant hormone signal transduction}	{At5g66880; KOG0583 Serine/threonine protein kinase T Signal transduction mechanisms ;}	{GO:0005524; ATP binding; molecular_function GO:0004672; protein kinase activity; molecular_function GO:0006468; protein phosphorylation; biological_process}	{XM_010682144.2; PREDICTED: Beta vulgaris subsp. vulgaris serine/threonine-protein kinase SRK2I (LOC104895591), mRNA}	{PF00069:Protein kinase domain PF07714:Protein tyrosine kinase}
transcript_HQ_SAB_transcript15483/f2p0/1891	-4.2585	1.3712e-50	1.0388e-49	{XP_010691012.1; PREDICTED: serine/threonine-protein kinase SRK2E isoform X1 [Beta vulgaris subsp. vulgaris]}	{sp|Q39193|SRK2I_ARATH; Serine/threonine-protein kinase SRK2I OS=Arabidopsis thaliana GN=SRK2I PE=1 SV=1}	{gra:105773102; K14498 SNRK2 serine/threonine-protein kinase SRK2 2.7.11.1 ko04016; Environmental Information Processing; Signal transduction; MAPK signaling pathway - plant | ko04075; Environmental Information Processing; Signal transduction; Plant hormone signal transduction}	{At5g66880; KOG0583 Serine/threonine protein kinase T Signal transduction mechanisms ;}	{GO:0005524; ATP binding; molecular_function GO:0004672; protein kinase activity; molecular_function GO:0006468; protein phosphorylation; biological_process}	{XM_010692711.2; PREDICTED: Beta vulgaris subsp. vulgaris serine/threonine-protein kinase SRK2E (LOC104904459), transcript variant X2, mRNA}	{PF07714:Protein tyrosine kinase PF00069:Protein kinase domain}
transcript_HQ_SAB_transcript12948/f2p0/2062	-3.6671	9.989e-43	6.5562e-42	{XP_010691012.1; PREDICTED: serine/threonine-protein kinase SRK2E isoform X1 [Beta vulgaris subsp. vulgaris]}	{sp|Q940H6|SRK2E_ARATH; Serine/threonine-protein kinase SRK2E OS=Arabidopsis thaliana GN=SRK2E PE=1 SV=1}	{thj:104804368; K14498 SNRK2 serine/threonine-protein kinase SRK2 2.7.11.1 ko04016; Environmental Information Processing; Signal transduction; MAPK signaling pathway - plant | ko04075; Environmental Information Processing; Signal transduction; Plant hormone signal transduction}	{At4g33950; KOG0583 Serine/threonine protein kinase T Signal transduction mechanisms ;}	{GO:0004672; protein kinase activity; molecular_function GO:0006468; protein phosphorylation; biological_process GO:0005524; ATP binding; molecular_function}	{XM_010692710.2; PREDICTED: Beta vulgaris subsp. vulgaris serine/threonine-protein kinase SRK2E (LOC104904459), transcript variant X1, mRNA}	{PF00069:Protein kinase domain PF07714:Protein tyrosine kinase}
transcript_HQ_SAB_transcript12908/f2p0/2086	2.971	0.0003886	0.00067683	{KNA08522.1; hypothetical protein SOVF_161830 [Spinacia oleracea]}	{sp|Q75LR7|SAPK1_ORYSJ; Serine/threonine-protein kinase SAPK1 OS=Oryza sativa subsp. japonica GN=SAPK1 PE=1 SV=1}	{vvi:100260262; K14498 SNRK2 serine/threonine-protein kinase SRK2 2.7.11.1 ko04016; Environmental Information Processing; Signal transduction; MAPK signaling pathway - plant | ko04075; Environmental Information Processing; Signal transduction; Plant hormone signal transduction}	{At1g78290; KOG0583 Serine/threonine protein kinase T Signal transduction mechanisms ;}	{GO:0005524; ATP binding; molecular_function GO:0004672; protein kinase activity; molecular_function GO:0006468; protein phosphorylation; biological_process}	{XM_010682694.2; PREDICTED: Beta vulgaris subsp. vulgaris serine/threonine-protein kinase SAPK2 (LOC104896021), mRNA}	{PF07714:Protein tyrosine kinase PF00069:Protein kinase domain}
transcript_HQ_BAB_transcript18071/f2p0/1650	2.7651	4.0652e-27	1.8577e-26	{XP_010680446.1; PREDICTED: serine/threonine-protein kinase SRK2I [Beta vulgaris subsp. vulgaris]}	{sp|Q39193|SRK2I_ARATH; Serine/threonine-protein kinase SRK2I OS=Arabidopsis thaliana GN=SRK2I PE=1 SV=1}	{csv:101206398; K14498 SNRK2 serine/threonine-protein kinase SRK2 2.7.11.1 ko04016; Environmental Information Processing; Signal transduction; MAPK signaling pathway - plant | ko04075; Environmental Information Processing; Signal transduction; Plant hormone signal transduction}	{At5g66880; KOG0583 Serine/threonine protein kinase T Signal transduction mechanisms ;}	{GO:0004672; protein kinase activity; molecular_function GO:0005524; ATP binding; molecular_function GO:0006468; protein phosphorylation; biological_process}	{XM_010682144.2; PREDICTED: Beta vulgaris subsp. vulgaris serine/threonine-protein kinase SRK2I (LOC104895591), mRNA}	{PF07714:Protein tyrosine kinase PF00069:Protein kinase domain}
transcript_HQ_SAB_transcript9139/f2p0/2381	-1.2785	3.4613e-18	1.2081e-17	{XP_010671821.1; PREDICTED: Probable E3 ubiquitin-protein ligase ARI7 isoform X1 [Beta vulgaris subsp. vulgaris]}	{sp|Q8W468|ARI8_ARATH; Probable E3 ubiquitin-protein ligase ARI8 OS=Arabidopsis thaliana GN=ARI8 PE=2 SV=1}	{bvg:104888512; K11968 ARIH1 ariadne-1 2.3.2.27 -}	{At1g65430; KOG1815 Predicted E3 ubiquitin ligase O Posttranslational modification, protein turnover, chaperones ;}	{GO:0005515; protein binding; molecular_function GO:0008270; zinc ion binding; molecular_function GO:0046872; metal ion binding; molecular_function GO:0055114; oxidation-reduction process; biological_process GO:0016491; oxidoreductase activity; molecular_function}	{XM_010673519.2; PREDICTED: Beta vulgaris subsp. vulgaris Probable E3 ubiquitin-protein ligase ARI7 (LOC104888512), transcript variant X1, mRNA}	{PF01232:Mannitol dehydrogenase Rossmann domain PF13639:Ring finger domain PF00097:Zinc finger, C3HC4 type (RING finger) PF14634:zinc-RING finger domain}
transcript_HQ_SAB_transcript8741/f4p0/2340	-1.8332	1.3129e-17	4.4986e-17	{XP_010684232.1; PREDICTED: Probable E3 ubiquitin-protein ligase ARI2 isoform X1 [Beta vulgaris subsp. vulgaris]}	{sp|Q84RR2|ARI2_ARATH; Probable E3 ubiquitin-protein ligase ARI2 OS=Arabidopsis thaliana GN=ARI2 PE=2 SV=1}	{bvg:104898820; K11968 ARIH1 ariadne-1 2.3.2.27 -}	{At4g34370; KOG1815 Predicted E3 ubiquitin ligase O Posttranslational modification, protein turnover, chaperones ;}	{GO:0005515; protein binding; molecular_function GO:0008270; zinc ion binding; molecular_function GO:0046872; metal ion binding; molecular_function}	{XM_010685930.2; PREDICTED: Beta vulgaris subsp. vulgaris Probable E3 ubiquitin-protein ligase ARI2 (LOC104898820), transcript variant X1, mRNA}	{PF13639:Ring finger domain PF00097:Zinc finger, C3HC4 type (RING finger) PF14634:zinc-RING finger domain}
transcript_HQ_SAB_transcript6741/f2p0/2653	0.53708	0.00011119	0.00020309	{KNA05952.1; hypothetical protein SOVF_185600 isoform A [Spinacia oleracea]}	{sp|Q8W468|ARI8_ARATH; Probable E3 ubiquitin-protein ligase ARI8 OS=Arabidopsis thaliana GN=ARI8 PE=2 SV=1}	{bvg:104890186; K11968 ARIH1 ariadne-1 2.3.2.27 -}	{At1g65430; KOG1815 Predicted E3 ubiquitin ligase O Posttranslational modification, protein turnover, chaperones ;}	{GO:0005634; nucleus; cellular_component GO:0046872; metal ion binding; molecular_function GO:0016586; RSC complex; cellular_component GO:0016514; SWI/SNF complex; cellular_component GO:0008270; zinc ion binding; molecular_function GO:0006338; chromatin remodeling; biological_process GO:0005515; protein binding; molecular_function}	{XM_010675577.2; PREDICTED: Beta vulgaris subsp. vulgaris Probable E3 ubiquitin-protein ligase ARI8 (LOC104890186), transcript variant X1, mRNA}	{PF14634:zinc-RING finger domain PF00097:Zinc finger, C3HC4 type (RING finger) PF09510:Rtt102p-like transcription regulator protein PF13639:Ring finger domain}
transcript_HQ_SAB_transcript648/f2p0/4326	0.74077	8.0388e-07	1.7055e-06	{XP_010680417.1; PREDICTED: uncharacterized protein LOC104895565 [Beta vulgaris subsp. vulgaris]}	{sp|Q9VR91|HERC2_DROME; Probable E3 ubiquitin-protein ligase HERC2 OS=Drosophila melanogaster GN=HERC2 PE=1 SV=3}	{bvg:104895565; - - - - -}	{NA}	{GO:0005876; spindle microtubule; cellular_component GO:0046872; metal ion binding; molecular_function GO:0042729; DASH complex; cellular_component GO:0008608; attachment of spindle microtubules to kinetochore; biological_process}	{XM_010682115.2; PREDICTED: Beta vulgaris subsp. vulgaris hypothetical protein (LOC104895565), mRNA}	{PF01363:FYVE zinc finger PF08287:Spc19}
transcript_HQ_SAB_transcript30518/f2p0/833	-2.9653	1.2381e-62	1.151e-61	{XP_010682265.1; PREDICTED: Probable E3 ubiquitin-protein ligase XERICO [Beta vulgaris subsp. vulgaris]}	{sp|Q9SI09|XERIC_ARATH; Probable E3 ubiquitin-protein ligase XERICO OS=Arabidopsis thaliana GN=XERICO PE=1 SV=1}	{pmum:103321837; K16285 XERICO RING/U-box domain-containing protein 2.3.2.27 -}	{At2g04240; KOG0800 FOG: Predicted E3 ubiquitin ligase O Posttranslational modification, protein turnover, chaperones ;}	{GO:0005515; protein binding; molecular_function GO:0005680; anaphase-promoting complex; cellular_component GO:0008270; zinc ion binding; molecular_function GO:0004842; ubiquitin-protein ligase activity; molecular_function GO:0046872; metal ion binding; molecular_function}	{XM_010683963.2; PREDICTED: Beta vulgaris subsp. vulgaris Probable E3 ubiquitin-protein ligase XERICO (LOC104897136), mRNA}	{PF12678:RING-H2 zinc finger domain PF14634:zinc-RING finger domain PF13639:Ring finger domain PF17123:RING-like zinc finger PF00097:Zinc finger, C3HC4 type (RING finger) PF12861:Anaphase-promoting complex subunit 11 RING-H2 finger PF17122:Zinc-finger PF12906:RING-variant domain}
transcript_HQ_SAB_transcript29859/f2p0/888	-1.5097	1.5611e-13	4.6155e-13	{XP_010687760.1; PREDICTED: E3 ubiquitin-protein ligase SDIR1 [Beta vulgaris subsp. vulgaris]}	{sp|Q852U6|RHY1A_ARATH; Probable E3 ubiquitin-protein ligase RHY1A OS=Arabidopsis thaliana GN=RHY1A PE=2 SV=1}	{vvi:100241393; - - - - -}	{At2g15580; KOG0800 FOG: Predicted E3 ubiquitin ligase O Posttranslational modification, protein turnover, chaperones ;}	{GO:0005680; anaphase-promoting complex; cellular_component GO:0008270; zinc ion binding; molecular_function GO:0005515; protein binding; molecular_function GO:0004842; ubiquitin-protein ligase activity; molecular_function GO:0046872; metal ion binding; molecular_function}	{XM_010689458.2; PREDICTED: Beta vulgaris subsp. vulgaris E3 ubiquitin-protein ligase SDIR1 (LOC104901832), mRNA}	{PF13639:Ring finger domain PF12861:Anaphase-promoting complex subunit 11 RING-H2 finger PF14634:zinc-RING finger domain PF12678:RING-H2 zinc finger domain PF00097:Zinc finger, C3HC4 type (RING finger) PF17123:RING-like zinc finger}
transcript_HQ_SAB_transcript29329/f7p0/934	1.2802	2.9941e-12	8.3879e-12	{KNA13391.1; hypothetical protein SOVF_117460 [Spinacia oleracea]}	{sp|Q9SUS4|RHA1A_ARATH; Probable E3 ubiquitin-protein ligase RHA1A OS=Arabidopsis thaliana GN=RHA1A PE=2 SV=1}	{sot:102588863; K16281 RHA1 RING-H2 zinc finger protein RHA1 - -}	{At3g61460; KOG0800 FOG: Predicted E3 ubiquitin ligase O Posttranslational modification, protein turnover, chaperones ;}	{GO:0008270; zinc ion binding; molecular_function GO:0005680; anaphase-promoting complex; cellular_component GO:0005515; protein binding; molecular_function GO:0046872; metal ion binding; molecular_function GO:0004842; ubiquitin-protein ligase activity; molecular_function}	{XM_019249427.1; PREDICTED: Beta vulgaris subsp. vulgaris E3 ubiquitin-protein ligase RHA1B-like (LOC109134986), mRNA}	{PF17123:RING-like zinc finger PF00097:Zinc finger, C3HC4 type (RING finger) PF14634:zinc-RING finger domain PF12678:RING-H2 zinc finger domain PF12861:Anaphase-promoting complex subunit 11 RING-H2 finger PF13639:Ring finger domain PF12906:RING-variant domain}
transcript_HQ_SAB_transcript28507/f2p0/1012	2.8145	2.8311e-35	1.5871e-34	{XP_010682265.1; PREDICTED: Probable E3 ubiquitin-protein ligase XERICO [Beta vulgaris subsp. vulgaris]}	{sp|Q9SI09|XERIC_ARATH; Probable E3 ubiquitin-protein ligase XERICO OS=Arabidopsis thaliana GN=XERICO PE=1 SV=1}	{gra:105785823; K16285 XERICO RING/U-box domain-containing protein 2.3.2.27 -}	{At2g04240; KOG0800 FOG: Predicted E3 ubiquitin ligase O Posttranslational modification, protein turnover, chaperones ;}	{GO:0008270; zinc ion binding; molecular_function GO:0005680; anaphase-promoting complex; cellular_component GO:0005515; protein binding; molecular_function GO:0046872; metal ion binding; molecular_function GO:0004842; ubiquitin-protein ligase activity; molecular_function}	{XM_010683963.2; PREDICTED: Beta vulgaris subsp. vulgaris Probable E3 ubiquitin-protein ligase XERICO (LOC104897136), mRNA}	{PF00097:Zinc finger, C3HC4 type (RING finger) PF17123:RING-like zinc finger PF12861:Anaphase-promoting complex subunit 11 RING-H2 finger PF12906:RING-variant domain PF17122:Zinc-finger PF14634:zinc-RING finger domain PF12678:RING-H2 zinc finger domain PF13639:Ring finger domain}
transcript_HQ_SAB_transcript27138/f58p0/1081	-1.6632	6.8062e-12	1.8791e-11	{XP_010682265.1; PREDICTED: Probable E3 ubiquitin-protein ligase XERICO [Beta vulgaris subsp. vulgaris]}	{sp|Q9SI09|XERIC_ARATH; Probable E3 ubiquitin-protein ligase XERICO OS=Arabidopsis thaliana GN=XERICO PE=1 SV=1}	{pmum:103321837; K16285 XERICO RING/U-box domain-containing protein 2.3.2.27 -}	{At2g04240; KOG0800 FOG: Predicted E3 ubiquitin ligase O Posttranslational modification, protein turnover, chaperones ;}	{GO:0046872; metal ion binding; molecular_function GO:0004842; ubiquitin-protein ligase activity; molecular_function GO:0005515; protein binding; molecular_function GO:0008270; zinc ion binding; molecular_function GO:0005680; anaphase-promoting complex; cellular_component}	{XM_010683963.2; PREDICTED: Beta vulgaris subsp. vulgaris Probable E3 ubiquitin-protein ligase XERICO (LOC104897136), mRNA}	{PF17122:Zinc-finger PF12906:RING-variant domain PF00097:Zinc finger, C3HC4 type (RING finger) PF17123:RING-like zinc finger PF12861:Anaphase-promoting complex subunit 11 RING-H2 finger PF13639:Ring finger domain PF14634:zinc-RING finger domain PF12678:RING-H2 zinc finger domain}
transcript_HQ_SAB_transcript23821/f3p0/1376	1.4893	2.3325e-20	8.7425e-20	{KNA24055.1; hypothetical protein SOVF_019200 [Spinacia oleracea]}	{sp|Q2HIJ8|RHB1A_ARATH; Probable E3 ubiquitin-protein ligase RHB1A OS=Arabidopsis thaliana GN=RHB1A PE=2 SV=1}	{bvg:104892272; - - - - -}	{At5g41350; KOG0800 FOG: Predicted E3 ubiquitin ligase O Posttranslational modification, protein turnover, chaperones ;}	{GO:0008270; zinc ion binding; molecular_function GO:0006355; regulation of transcription, DNA-dependent; biological_process GO:0043189; H4/H2A histone acetyltransferase complex; cellular_component GO:0046872; metal ion binding; molecular_function GO:0005634; nucleus; cellular_component GO:0005680; anaphase-promoting complex; cellular_component GO:0005515; protein binding; molecular_function GO:0…	{XM_010678154.2; PREDICTED: Beta vulgaris subsp. vulgaris Probable E3 ubiquitin-protein ligase RHB1A (LOC104892272), mRNA}	{PF12678:RING-H2 zinc finger domain PF14634:zinc-RING finger domain PF07904:Chromatin modification-related protein EAF7 PF13639:Ring finger domain PF17123:RING-like zinc finger PF00097:Zinc finger, C3HC4 type (RING finger) PF12861:Anaphase-promoting complex subunit 11 RING-H2 finger PF11789:Zinc-finger of the MIZ type in Nse subunit}
transcript_HQ_SAB_transcript23284/f3p0/1437	-0.41587	0.0035534	0.0056371	{XP_010673828.1; PREDICTED: Probable E3 ubiquitin-protein ligase RHC1A [Beta vulgaris subsp. vulgaris]}	{sp|O22197|RHC1A_ARATH; Probable E3 ubiquitin-protein ligase RHC1A OS=Arabidopsis thaliana GN=RHC1A PE=2 SV=1}	{bvg:104890144; K11982 RNF115_126 E3 ubiquitin-protein ligase RNF115/126 2.3.2.27 -}	{At2g40830; KOG0800 FOG: Predicted E3 ubiquitin ligase O Posttranslational modification, protein turnover, chaperones ;}	{GO:0006464; protein modification process; biological_process GO:0046872; metal ion binding; molecular_function GO:0004842; ubiquitin-protein ligase activity; molecular_function GO:0016151; nickel ion binding; molecular_function GO:0008270; zinc ion binding; molecular_function GO:0005680; anaphase-promoting complex; cellular_component GO:0005515; protein binding; molecular_function}	{XM_010675526.2; PREDICTED: Beta vulgaris subsp. vulgaris Probable E3 ubiquitin-protein ligase RHC1A (LOC104890144), mRNA}	{PF13639:Ring finger domain PF12678:RING-H2 zinc finger domain PF14634:zinc-RING finger domain PF11789:Zinc-finger of the MIZ type in Nse subunit PF17122:Zinc-finger PF00097:Zinc finger, C3HC4 type (RING finger) PF01155:Hydrogenase/urease nickel incorporation, metallochaperone, hypA PF17123:RING-like zinc finger PF12861:Anaphase-promoting complex subunit 11 RING-H2 finger}
transcript_HQ_SAB_transcript20088/f8p0/1598	2.0107	1.1663e-33	6.2699e-33	{XP_010684516.1; PREDICTED: Probable E3 ubiquitin-protein ligase BAH1-like 1 isoform X1 [Beta vulgaris subsp. vulgaris]}	{sp|B8B5U8|BAHL2_ORYSI; Probable E3 ubiquitin-protein ligase BAH1-like 1 OS=Oryza sativa subsp. indica GN=OsI_27296 PE=3 SV=1}	{rcu:8259852; K16275 BAH, NLA E3 ubiquitin-protein ligase BAH 2.3.2.27 -}	{NA}	{GO:0005515; protein binding; molecular_function GO:0008270; zinc ion binding; molecular_function GO:0046872; metal ion binding; molecular_function}	{XM_010686214.2; PREDICTED: Beta vulgaris subsp. vulgaris Probable E3 ubiquitin-protein ligase BAH1-like 1 (LOC104899080), transcript variant X1, mRNA}	{PF13465:Zinc-finger double domain PF13639:Ring finger domain PF14634:zinc-RING finger domain PF00097:Zinc finger, C3HC4 type (RING finger) PF17123:RING-like zinc finger}
transcript_HQ_SAB_transcript19405/f10p0/1625	-2.1607	7.8492e-28	3.6558e-27	{XP_010684105.1; PREDICTED: Probable E3 ubiquitin-protein ligase LOG2 [Beta vulgaris subsp. vulgaris]}	{sp|Q9S752|LOFG2_ARATH; Probable E3 ubiquitin-protein ligase LOG2 OS=Arabidopsis thaliana GN=LOG2 PE=1 SV=1}	{csv:101216150; - - - - -}	{At3g09770; KOG4265 Predicted E3 ubiquitin ligase O Posttranslational modification, protein turnover, chaperones ;}	{GO:0005515; protein binding; molecular_function GO:0003723; RNA binding; molecular_function GO:0008270; zinc ion binding; molecular_function}	{XM_010685803.2; PREDICTED: Beta vulgaris subsp. vulgaris Probable E3 ubiquitin-protein ligase LOG2 (LOC104898700), mRNA}	{PF14634:zinc-RING finger domain PF13639:Ring finger domain PF03854:P-11 zinc finger}
transcript_HQ_SAB_transcript17375/f2p0/1808	Inf	7.4718e-47	5.2735e-46	{XP_010684105.1; PREDICTED: Probable E3 ubiquitin-protein ligase LOG2 [Beta vulgaris subsp. vulgaris]}	{sp|Q9S752|LOFG2_ARATH; Probable E3 ubiquitin-protein ligase LOG2 OS=Arabidopsis thaliana GN=LOG2 PE=1 SV=1}	{mdm:103450060; - - - - -}	{At3g09770; KOG4265 Predicted E3 ubiquitin ligase O Posttranslational modification, protein turnover, chaperones ;}	{GO:0003723; RNA binding; molecular_function GO:0005515; protein binding; molecular_function GO:0008270; zinc ion binding; molecular_function}	{XM_010685803.2; PREDICTED: Beta vulgaris subsp. vulgaris Probable E3 ubiquitin-protein ligase LOG2 (LOC104898700), mRNA}	{PF13639:Ring finger domain PF03854:P-11 zinc finger PF14634:zinc-RING finger domain PF17123:RING-like zinc finger}
transcript_HQ_SAB_transcript13270/f4p0/2011	-2.3798	1.9098e-60	1.71e-59	{KNA09140.1; hypothetical protein SOVF_156260 [Spinacia oleracea]}	{sp|Q9SNB6|RDUF1_ARATH; E3 ubiquitin-protein ligase RDUF1 OS=Arabidopsis thaliana GN=RDUF1 PE=1 SV=1}	{bvg:104904405; K11982 RNF115_126 E3 ubiquitin-protein ligase RNF115/126 2.3.2.27 -}	{At3g46620; KOG0800 FOG: Predicted E3 ubiquitin ligase O Posttranslational modification, protein turnover, chaperones ;}	{GO:0004842; ubiquitin-protein ligase activity; molecular_function GO:0046872; metal ion binding; molecular_function GO:0006464; protein modification process; biological_process GO:0005515; protein binding; molecular_function GO:0005680; anaphase-promoting complex; cellular_component GO:0016151; nickel ion binding; molecular_function GO:0008270; zinc ion binding; molecular_function}	{XM_010692651.2; PREDICTED: Beta vulgaris subsp. vulgaris Probable E3 ubiquitin-protein ligase RHC2A (LOC104904405), mRNA}	{PF12678:RING-H2 zinc finger domain PF14634:zinc-RING finger domain PF13639:Ring finger domain PF12861:Anaphase-promoting complex subunit 11 RING-H2 finger PF17123:RING-like zinc finger PF01155:Hydrogenase/urease nickel incorporation, metallochaperone, hypA PF00097:Zinc finger, C3HC4 type (RING finger) PF17122:Zinc-finger}
transcript_HQ_SAB_transcript13265/f10p0/1954	-0.87029	1.3873e-09	3.4348e-09	{XP_010669289.1; PREDICTED: Probable E3 ubiquitin-protein ligase RHG1A [Beta vulgaris subsp. vulgaris]}	{sp|O49500|MBR2_ARATH; E3 ubiquitin-protein ligase MBR2 OS=Arabidopsis thaliana GN=MBR2 PE=1 SV=1}	{bvg:104886539; - - - - -}	{At5g24870; KOG0800 FOG: Predicted E3 ubiquitin ligase O Posttranslational modification, protein turnover, chaperones ;}	{GO:0004842; ubiquitin-protein ligase activity; molecular_function GO:0046872; metal ion binding; molecular_function GO:0005680; anaphase-promoting complex; cellular_component GO:0008270; zinc ion binding; molecular_function GO:0005515; protein binding; molecular_function}	{XM_019247477.1; PREDICTED: Beta vulgaris subsp. vulgaris Probable E3 ubiquitin-protein ligase RHG1A (LOC104886539), transcript variant X3, mRNA}	{PF00097:Zinc finger, C3HC4 type (RING finger) PF17123:RING-like zinc finger PF12861:Anaphase-promoting complex subunit 11 RING-H2 finger PF14634:zinc-RING finger domain PF12678:RING-H2 zinc finger domain PF13639:Ring finger domain}
transcript_HQ_SAB_transcript13139/f3p0/2055	-0.93311	2.8058e-05	5.3626e-05	{KNA13049.1; hypothetical protein SOVF_120280 [Spinacia oleracea]}	{sp|Q84RR2|ARI2_ARATH; Probable E3 ubiquitin-protein ligase ARI2 OS=Arabidopsis thaliana GN=ARI2 PE=2 SV=1}	{nnu:104595795; K11968 ARIH1 ariadne-1 2.3.2.27 -}	{At4g34370; KOG1815 Predicted E3 ubiquitin ligase O Posttranslational modification, protein turnover, chaperones ;}	{NA}	{NA}	{NA}
transcript_HQ_BAB_transcript9698/f2p0/2601	3.4479	6.4605e-06	1.2911e-05	{XP_010675444.1; PREDICTED: Probable E3 ubiquitin-protein ligase HIP1 [Beta vulgaris subsp. vulgaris]}	{sp|Q7XTV7|HIP1_ORYSJ; Probable E3 ubiquitin-protein ligase HIP1 OS=Oryza sativa subsp. japonica GN=HIP1 PE=1 SV=2}	{bvg:104891445; K10635 RNF111 E3 ubiquitin-protein ligase Arkadia 2.3.2.27 -}	{At3g15070; KOG0800 FOG: Predicted E3 ubiquitin ligase O Posttranslational modification, protein turnover, chaperones ;}	{GO:0005680; anaphase-promoting complex; cellular_component GO:0008270; zinc ion binding; molecular_function GO:0004842; ubiquitin-protein ligase activity; molecular_function GO:0046872; metal ion binding; molecular_function GO:0005515; protein binding; molecular_function}	{NA}	{PF00097:Zinc finger, C3HC4 type (RING finger) PF12906:RING-variant domain PF13639:Ring finger domain PF12678:RING-H2 zinc finger domain PF17123:RING-like zinc finger PF00628:PHD-finger PF12861:Anaphase-promoting complex subunit 11 RING-H2 finger PF14634:zinc-RING finger domain}
transcript_HQ_BAB_transcript9680/f2p0/2595	3.4631	0.0028029	0.0044915	{XP_010684232.1; PREDICTED: Probable E3 ubiquitin-protein ligase ARI2 isoform X1 [Beta vulgaris subsp. vulgaris]}	{sp|Q84RR2|ARI2_ARATH; Probable E3 ubiquitin-protein ligase ARI2 OS=Arabidopsis thaliana GN=ARI2 PE=2 SV=1}	{bvg:104898820; K11968 ARIH1 ariadne-1 2.3.2.27 -}	{At4g34370; KOG1815 Predicted E3 ubiquitin ligase O Posttranslational modification, protein turnover, chaperones ;}	{GO:0005515; protein binding; molecular_function GO:0008270; zinc ion binding; molecular_function GO:0046872; metal ion binding; molecular_function}	{XM_010685930.2; PREDICTED: Beta vulgaris subsp. vulgaris Probable E3 ubiquitin-protein ligase ARI2 (LOC104898820), transcript variant X1, mRNA}	{PF00097:Zinc finger, C3HC4 type (RING finger) PF14634:zinc-RING finger domain PF13639:Ring finger domain}
transcript_HQ_BAB_transcript9133/f2p0/2670	0.75177	1.0362e-06	2.1824e-06	{KNA05952.1; hypothetical protein SOVF_185600 isoform A [Spinacia oleracea]}	{sp|Q8W468|ARI8_ARATH; Probable E3 ubiquitin-protein ligase ARI8 OS=Arabidopsis thaliana GN=ARI8 PE=2 SV=1}	{bvg:104890186; K11968 ARIH1 ariadne-1 2.3.2.27 -}	{At1g65430; KOG1815 Predicted E3 ubiquitin ligase O Posttranslational modification, protein turnover, chaperones ;}	{GO:0008270; zinc ion binding; molecular_function GO:0016514; SWI/SNF complex; cellular_component GO:0005634; nucleus; cellular_component GO:0046872; metal ion binding; molecular_function GO:0005515; protein binding; molecular_function GO:0006338; chromatin remodeling; biological_process GO:0016586; RSC complex; cellular_component}	{XM_010675577.2; PREDICTED: Beta vulgaris subsp. vulgaris Probable E3 ubiquitin-protein ligase ARI8 (LOC104890186), transcript variant X1, mRNA}	{PF00097:Zinc finger, C3HC4 type (RING finger) PF09510:Rtt102p-like transcription regulator protein PF13639:Ring finger domain PF14634:zinc-RING finger domain}
transcript_HQ_BAB_transcript8389/f3p0/2825	5.3788	2.4351e-175	7.4639e-174	{XP_019106391.1; PREDICTED: Probable E3 ubiquitin-protein ligase BAH1-like 1 isoform X2 [Beta vulgaris subsp. vulgaris]}	{sp|B8B5U8|BAHL2_ORYSI; Probable E3 ubiquitin-protein ligase BAH1-like 1 OS=Oryza sativa subsp. indica GN=OsI_27296 PE=3 SV=1}	{rcu:8259852; K16275 BAH, NLA E3 ubiquitin-protein ligase BAH 2.3.2.27 -}	{NA}	{GO:0005515; protein binding; molecular_function GO:0008270; zinc ion binding; molecular_function GO:0046872; metal ion binding; molecular_function}	{XM_019250846.1; PREDICTED: Beta vulgaris subsp. vulgaris Probable E3 ubiquitin-protein ligase BAH1-like 1 (LOC104899080), transcript variant X2, mRNA}	{PF14634:zinc-RING finger domain PF17123:RING-like zinc finger PF13465:Zinc-finger double domain PF13639:Ring finger domain PF00097:Zinc finger, C3HC4 type (RING finger)}
transcript_HQ_BAB_transcript7551/f2p0/2868	0.35782	0.012557	0.01869	{XP_010688805.1; PREDICTED: Probable E3 ubiquitin-protein ligase RHG1A [Beta vulgaris subsp. vulgaris]}	{sp|Q9FMM4|RHG1A_ARATH; Probable E3 ubiquitin-protein ligase RHG1A OS=Arabidopsis thaliana GN=RHG1A PE=2 SV=1}	{bvg:104902646; K10635 RNF111 E3 ubiquitin-protein ligase Arkadia 2.3.2.27 -}	{At1g45180; KOG0800 FOG: Predicted E3 ubiquitin ligase O Posttranslational modification, protein turnover, chaperones ;}	{GO:0005515; protein binding; molecular_function GO:0008270; zinc ion binding; molecular_function GO:0005680; anaphase-promoting complex; cellular_component GO:0046872; metal ion binding; molecular_function GO:0004842; ubiquitin-protein ligase activity; molecular_function}	{XM_010690503.2; PREDICTED: Beta vulgaris subsp. vulgaris Probable E3 ubiquitin-protein ligase RHG1A (LOC104902646), mRNA}	{PF12678:RING-H2 zinc finger domain PF13639:Ring finger domain PF17123:RING-like zinc finger PF14634:zinc-RING finger domain PF12861:Anaphase-promoting complex subunit 11 RING-H2 finger PF12906:RING-variant domain PF00097:Zinc finger, C3HC4 type (RING finger)}
transcript_HQ_BAB_transcript437/f3p0/4891	2.0106	6.9748e-10	1.7518e-09	{XP_010673731.1; PREDICTED: uncharacterized protein LOC104890071 [Beta vulgaris subsp. vulgaris]}	{sp|Q15751|HERC1_HUMAN; Probable E3 ubiquitin-protein ligase HERC1 OS=Homo sapiens GN=HERC1 PE=1 SV=2}	{bvg:104890071; - - - - -}	{NA}	{GO:0032065; cortical protein anchoring; biological_process GO:0005515; protein binding; molecular_function GO:0005938; cell cortex; cellular_component GO:0046872; metal ion binding; molecular_function GO:0005543; phospholipid binding; molecular_function}	{XM_010675429.2; PREDICTED: Beta vulgaris subsp. vulgaris hypothetical protein (LOC104890071), mRNA}	{PF01363:FYVE zinc finger PF12814:Meiotic cell cortex C-terminal pleckstrin homology}
transcript_HQ_BAB_transcript3929/f2p0/3475	2.0804	1.602e-16	5.2905e-16	{XP_010682363.1; PREDICTED: Probable E3 ubiquitin-protein ligase HERC4 [Beta vulgaris subsp. vulgaris]}	{sp|O95714|HERC2_HUMAN; E3 ubiquitin-protein ligase HERC2 OS=Homo sapiens GN=HERC2 PE=1 SV=2}	{vvi:100247438; - - - - -}	{At3g26100; KOG1426 FOG: RCC1 domain S Function unknown ;}	{NA}	{XM_019250390.1; PREDICTED: Beta vulgaris subsp. vulgaris Probable E3 ubiquitin-protein ligase HERC4 (LOC104897229), transcript variant X6, mRNA}	{NA}
transcript_HQ_BAB_transcript20199/f3p0/1193	1.5301	2.7608e-24	1.1654e-23	{XP_010687503.1; PREDICTED: Probable E3 ubiquitin-protein ligase RHY1A isoform X1 [Beta vulgaris subsp. vulgaris]}	{sp|Q852U6|RHY1A_ARATH; Probable E3 ubiquitin-protein ligase RHY1A OS=Arabidopsis thaliana GN=RHY1A PE=2 SV=1}	{nnu:104607835; - - - - -}	{At1g49850; KOG0800 FOG: Predicted E3 ubiquitin ligase O Posttranslational modification, protein turnover, chaperones ;}	{GO:0005515; protein binding; molecular_function GO:0008270; zinc ion binding; molecular_function GO:0005680; anaphase-promoting complex; cellular_component GO:0046872; metal ion binding; molecular_function GO:0004842; ubiquitin-protein ligase activity; molecular_function}	{XM_010689201.2; PREDICTED: Beta vulgaris subsp. vulgaris Probable E3 ubiquitin-protein ligase RHY1A (LOC104901612), transcript variant X1, mRNA}	{PF12861:Anaphase-promoting complex subunit 11 RING-H2 finger PF00097:Zinc finger, C3HC4 type (RING finger) PF12906:RING-variant domain PF12678:RING-H2 zinc finger domain PF13639:Ring finger domain PF14634:zinc-RING finger domain PF17123:RING-like zinc finger}
transcript_HQ_BAB_transcript17254/f2p0/1801	5.5154	5.0877e-117	9.0428e-116	{XP_010684105.1; PREDICTED: Probable E3 ubiquitin-protein ligase LOG2 [Beta vulgaris subsp. vulgaris]}	{sp|Q9S752|LOFG2_ARATH; Probable E3 ubiquitin-protein ligase LOG2 OS=Arabidopsis thaliana GN=LOG2 PE=1 SV=1}	{mdm:103450060; - - - - -}	{At3g09770; KOG4265 Predicted E3 ubiquitin ligase O Posttranslational modification, protein turnover, chaperones ;}	{GO:0005515; protein binding; molecular_function GO:0003723; RNA binding; molecular_function GO:0008270; zinc ion binding; molecular_function}	{XM_010685803.2; PREDICTED: Beta vulgaris subsp. vulgaris Probable E3 ubiquitin-protein ligase LOG2 (LOC104898700), mRNA}	{PF03854:P-11 zinc finger PF13639:Ring finger domain PF14634:zinc-RING finger domain PF17123:RING-like zinc finger}
transcript_HQ_BAB_transcript15217/f4p0/1983	3.3895	2.0492e-28	9.7093e-28	{KNA09140.1; hypothetical protein SOVF_156260 [Spinacia oleracea]}	{sp|Q9SNB6|RDUF1_ARATH; E3 ubiquitin-protein ligase RDUF1 OS=Arabidopsis thaliana GN=RDUF1 PE=1 SV=1}	{bvg:104904405; K11982 RNF115_126 E3 ubiquitin-protein ligase RNF115/126 2.3.2.27 -}	{At3g46620; KOG0800 FOG: Predicted E3 ubiquitin ligase O Posttranslational modification, protein turnover, chaperones ;}	{GO:0016151; nickel ion binding; molecular_function GO:0035556; intracellular signal transduction; biological_process GO:0004842; ubiquitin-protein ligase activity; molecular_function GO:0046872; metal ion binding; molecular_function GO:0005680; anaphase-promoting complex; cellular_component GO:0008270; zinc ion binding; molecular_function GO:0006464; protein modification process; biological_proc…	{XM_010692651.2; PREDICTED: Beta vulgaris subsp. vulgaris Probable E3 ubiquitin-protein ligase RHC2A (LOC104904405), mRNA}	{PF00097:Zinc finger, C3HC4 type (RING finger) PF13639:Ring finger domain PF12678:RING-H2 zinc finger domain PF17123:RING-like zinc finger PF00130:Phorbol esters/diacylglycerol binding domain (C1 domain) PF12861:Anaphase-promoting complex subunit 11 RING-H2 finger PF01155:Hydrogenase/urease nickel incorporation, metallochaperone, hypA PF14634:zinc-RING finger domain}
transcript_HQ_BAB_transcript15024/f2p0/1991	3.372	2.0383e-20	7.656e-20	{KNA13049.1; hypothetical protein SOVF_120280 [Spinacia oleracea]}	{sp|Q84RR2|ARI2_ARATH; Probable E3 ubiquitin-protein ligase ARI2 OS=Arabidopsis thaliana GN=ARI2 PE=2 SV=1}	{csv:101205066; K11968 ARIH1 ariadne-1 2.3.2.27 -}	{At4g34370; KOG1815 Predicted E3 ubiquitin ligase O Posttranslational modification, protein turnover, chaperones ;}	{NA}	{NA}	{NA}
transcript_HQ_BAB_transcript14957/f2p0/2033	Inf	7.3528e-29	3.5253e-28	{XP_010675444.1; PREDICTED: Probable E3 ubiquitin-protein ligase HIP1 [Beta vulgaris subsp. vulgaris]}	{sp|Q7XTV7|HIP1_ORYSJ; Probable E3 ubiquitin-protein ligase HIP1 OS=Oryza sativa subsp. japonica GN=HIP1 PE=1 SV=2}	{bvg:104891445; K10635 RNF111 E3 ubiquitin-protein ligase Arkadia 2.3.2.27 -}	{At3g15070; KOG0800 FOG: Predicted E3 ubiquitin ligase O Posttranslational modification, protein turnover, chaperones ;}	{GO:0004842; ubiquitin-protein ligase activity; molecular_function GO:0046872; metal ion binding; molecular_function GO:0008270; zinc ion binding; molecular_function GO:0005680; anaphase-promoting complex; cellular_component GO:0005515; protein binding; molecular_function}	{NA}	{PF13639:Ring finger domain PF12678:RING-H2 zinc finger domain PF17123:RING-like zinc finger PF12906:RING-variant domain PF00097:Zinc finger, C3HC4 type (RING finger) PF14634:zinc-RING finger domain PF00628:PHD-finger PF12861:Anaphase-promoting complex subunit 11 RING-H2 finger}
transcript_HQ_BAB_transcript14829/f3p0/2044	2.4993	8.5517e-30	4.2009e-29	{KNA25649.1; hypothetical protein SOVF_004680 [Spinacia oleracea]}	{sp|Q7XTV7|HIP1_ORYSJ; Probable E3 ubiquitin-protein ligase HIP1 OS=Oryza sativa subsp. japonica GN=HIP1 PE=1 SV=2}	{bvg:104886539; - - - - -}	{At5g24870; KOG0800 FOG: Predicted E3 ubiquitin ligase O Posttranslational modification, protein turnover, chaperones ;}	{GO:0005515; protein binding; molecular_function GO:0005680; anaphase-promoting complex; cellular_component GO:0008270; zinc ion binding; molecular_function GO:0046872; metal ion binding; molecular_function GO:0004842; ubiquitin-protein ligase activity; molecular_function}	{XM_010670987.2; PREDICTED: Beta vulgaris subsp. vulgaris Probable E3 ubiquitin-protein ligase RHG1A (LOC104886539), transcript variant X1, mRNA}	{PF17123:RING-like zinc finger PF14634:zinc-RING finger domain PF13639:Ring finger domain PF12678:RING-H2 zinc finger domain PF00097:Zinc finger, C3HC4 type (RING finger) PF00628:PHD-finger PF12861:Anaphase-promoting complex subunit 11 RING-H2 finger}
transcript_HQ_BAB_transcript14711/f2p0/2043	1.3031	5.2503e-05	9.8297e-05	{XP_010675444.1; PREDICTED: Probable E3 ubiquitin-protein ligase HIP1 [Beta vulgaris subsp. vulgaris]}	{sp|Q7XTV7|HIP1_ORYSJ; Probable E3 ubiquitin-protein ligase HIP1 OS=Oryza sativa subsp. japonica GN=HIP1 PE=1 SV=2}	{bvg:104891445; K10635 RNF111 E3 ubiquitin-protein ligase Arkadia 2.3.2.27 -}	{At3g15070; KOG0800 FOG: Predicted E3 ubiquitin ligase O Posttranslational modification, protein turnover, chaperones ;}	{GO:0005515; protein binding; molecular_function GO:0008270; zinc ion binding; molecular_function GO:0005680; anaphase-promoting complex; cellular_component GO:0046872; metal ion binding; molecular_function GO:0004842; ubiquitin-protein ligase activity; molecular_function}	{NA}	{PF00628:PHD-finger PF12861:Anaphase-promoting complex subunit 11 RING-H2 finger PF14634:zinc-RING finger domain PF12906:RING-variant domain PF00097:Zinc finger, C3HC4 type (RING finger) PF13639:Ring finger domain PF12678:RING-H2 zinc finger domain PF17123:RING-like zinc finger}
transcript_HQ_BAB_transcript14192/f2p0/2083	5.2011	3.6645e-115	6.3701e-114	{KNA25649.1; hypothetical protein SOVF_004680 [Spinacia oleracea]}	{sp|Q7XTV7|HIP1_ORYSJ; Probable E3 ubiquitin-protein ligase HIP1 OS=Oryza sativa subsp. japonica GN=HIP1 PE=1 SV=2}	{bvg:104886539; - - - - -}	{At5g24870; KOG0800 FOG: Predicted E3 ubiquitin ligase O Posttranslational modification, protein turnover, chaperones ;}	{GO:0004842; ubiquitin-protein ligase activity; molecular_function GO:0046872; metal ion binding; molecular_function GO:0005680; anaphase-promoting complex; cellular_component GO:0008270; zinc ion binding; molecular_function GO:0005515; protein binding; molecular_function}	{XM_019247477.1; PREDICTED: Beta vulgaris subsp. vulgaris Probable E3 ubiquitin-protein ligase RHG1A (LOC104886539), transcript variant X3, mRNA}	{PF00097:Zinc finger, C3HC4 type (RING finger) PF00628:PHD-finger PF12861:Anaphase-promoting complex subunit 11 RING-H2 finger PF14634:zinc-RING finger domain PF17123:RING-like zinc finger PF12678:RING-H2 zinc finger domain PF13639:Ring finger domain}
transcript_HQ_BAB_transcript13285/f5p0/2138	1.4633	1.836e-21	7.1046e-21	{XP_010682363.1; PREDICTED: Probable E3 ubiquitin-protein ligase HERC4 [Beta vulgaris subsp. vulgaris]}	{sp|O95714|HERC2_HUMAN; E3 ubiquitin-protein ligase HERC2 OS=Homo sapiens GN=HERC2 PE=1 SV=2}	{vvi:100247438; - - - - -}	{At3g26100; KOG1426 FOG: RCC1 domain S Function unknown ;}	{NA}	{XM_010684062.2; PREDICTED: Beta vulgaris subsp. vulgaris Probable E3 ubiquitin-protein ligase HERC4 (LOC104897229), transcript variant X2, mRNA}	{NA}
transcript_HQ_BAB_transcript13120/f2p0/2221	9.011	3.6682e-95	5.2314e-94	{XP_010682363.1; PREDICTED: Probable E3 ubiquitin-protein ligase HERC4 [Beta vulgaris subsp. vulgaris]}	{sp|O95714|HERC2_HUMAN; E3 ubiquitin-protein ligase HERC2 OS=Homo sapiens GN=HERC2 PE=1 SV=2}	{vvi:100247438; - - - - -}	{At3g26100; KOG1426 FOG: RCC1 domain S Function unknown ;}	{NA}	{XM_010684062.2; PREDICTED: Beta vulgaris subsp. vulgaris Probable E3 ubiquitin-protein ligase HERC4 (LOC104897229), transcript variant X2, mRNA}	{NA}
transcript_HQ_BAB_transcript12400/f6p0/2244	2.4351	5.0684e-61	4.596e-60	{XP_010693494.1; PREDICTED: Probable E3 ubiquitin-protein ligase ARI8 [Beta vulgaris subsp. vulgaris]}	{sp|Q8W468|ARI8_ARATH; Probable E3 ubiquitin-protein ligase ARI8 OS=Arabidopsis thaliana GN=ARI8 PE=2 SV=1}	{jcu:105629233; K11968 ARIH1 ariadne-1 2.3.2.27 -}	{At1g65430; KOG1815 Predicted E3 ubiquitin ligase O Posttranslational modification, protein turnover, chaperones ;}	{GO:0006397; mRNA processing; biological_process GO:0046872; metal ion binding; molecular_function}	{NA}	{PF00097:Zinc finger, C3HC4 type (RING finger) PF01480:PWI domain}
transcript_HQ_BAB_transcript1219/f3p0/4258	2.9178	3.2129e-70	3.3224e-69	{XP_010680417.1; PREDICTED: uncharacterized protein LOC104895565 [Beta vulgaris subsp. vulgaris]}	{sp|Q9VR91|HERC2_DROME; Probable E3 ubiquitin-protein ligase HERC2 OS=Drosophila melanogaster GN=HERC2 PE=1 SV=3}	{bvg:104895565; - - - - -}	{NA}	{GO:0008608; attachment of spindle microtubules to kinetochore; biological_process GO:0042729; DASH complex; cellular_component GO:0005876; spindle microtubule; cellular_component GO:0046872; metal ion binding; molecular_function}	{XM_010682115.2; PREDICTED: Beta vulgaris subsp. vulgaris hypothetical protein (LOC104895565), mRNA}	{PF08287:Spc19 PF01363:FYVE zinc finger}
transcript_HQ_BAB_transcript11410/f7p0/2378	Inf	3.0617e-222	1.4097e-220	{XP_010671821.1; PREDICTED: Probable E3 ubiquitin-protein ligase ARI7 isoform X1 [Beta vulgaris subsp. vulgaris]}	{sp|Q8W468|ARI8_ARATH; Probable E3 ubiquitin-protein ligase ARI8 OS=Arabidopsis thaliana GN=ARI8 PE=2 SV=1}	{bvg:104888512; K11968 ARIH1 ariadne-1 2.3.2.27 -}	{At1g65430; KOG1815 Predicted E3 ubiquitin ligase O Posttranslational modification, protein turnover, chaperones ;}	{GO:0055114; oxidation-reduction process; biological_process GO:0006338; chromatin remodeling; biological_process GO:0016586; RSC complex; cellular_component GO:0016491; oxidoreductase activity; molecular_function GO:0005515; protein binding; molecular_function GO:0046872; metal ion binding; molecular_function GO:0005634; nucleus; cellular_component GO:0016514; SWI/SNF complex; cellular_component…	{XM_010673519.2; PREDICTED: Beta vulgaris subsp. vulgaris Probable E3 ubiquitin-protein ligase ARI7 (LOC104888512), transcript variant X1, mRNA}	{PF09510:Rtt102p-like transcription regulator protein PF13639:Ring finger domain PF14634:zinc-RING finger domain PF01232:Mannitol dehydrogenase Rossmann domain PF00097:Zinc finger, C3HC4 type (RING finger)}
transcript_HQ_BAB_transcript1036/f9p0/4307	-1.0935	3.1681e-10	8.0912e-10	{XP_010673731.1; PREDICTED: uncharacterized protein LOC104890071 [Beta vulgaris subsp. vulgaris]}	{sp|Q15751|HERC1_HUMAN; Probable E3 ubiquitin-protein ligase HERC1 OS=Homo sapiens GN=HERC1 PE=1 SV=2}	{bvg:104890071; - - - - -}	{NA}	{GO:0032065; cortical protein anchoring; biological_process GO:0005515; protein binding; molecular_function GO:0005938; cell cortex; cellular_component GO:0046872; metal ion binding; molecular_function GO:0005543; phospholipid binding; molecular_function}	{XM_010675429.2; PREDICTED: Beta vulgaris subsp. vulgaris hypothetical protein (LOC104890071), mRNA}	{PF01363:FYVE zinc finger PF12814:Meiotic cell cortex C-terminal pleckstrin homology}
transcript_HQ_BAB_transcript10258/f5p0/2521	4.7027	1.6347e-62	1.5145e-61	{XP_010684232.1; PREDICTED: Probable E3 ubiquitin-protein ligase ARI2 isoform X1 [Beta vulgaris subsp. vulgaris]}	{sp|Q84RR2|ARI2_ARATH; Probable E3 ubiquitin-protein ligase ARI2 OS=Arabidopsis thaliana GN=ARI2 PE=2 SV=1}	{bvg:104898820; K11968 ARIH1 ariadne-1 2.3.2.27 -}	{At4g34370; KOG1815 Predicted E3 ubiquitin ligase O Posttranslational modification, protein turnover, chaperones ;}	{GO:0005515; protein binding; molecular_function GO:0008270; zinc ion binding; molecular_function GO:0046872; metal ion binding; molecular_function}	{XM_010685930.2; PREDICTED: Beta vulgaris subsp. vulgaris Probable E3 ubiquitin-protein ligase ARI2 (LOC104898820), transcript variant X1, mRNA}	{PF13639:Ring finger domain PF14634:zinc-RING finger domain PF00097:Zinc finger, C3HC4 type (RING finger)}
transcript_HQ_SAB_transcript5891/f5p0/2747	-1.1455	1.6774e-17	5.7199e-17	{XP_010666612.1; PREDICTED: zeaxanthin epoxidase, chloroplastic [Beta vulgaris subsp. vulgaris]}	{sp|O81360|ABA2_PRUAR; Zeaxanthin epoxidase, chloroplastic OS=Prunus armeniaca PE=2 SV=1}	{pper:PRUPE_ppa002248mg; K09838 ZEP, ABA1 zeaxanthin epoxidase 1.14.15.21 ko00906; Metabolism; Metabolism of terpenoids and polyketides; Carotenoid biosynthesis}	{At5g67030; KOG2614 Kynurenine 3-monooxygenase and related flavoprotein monooxygenases CR Energy production and conversion ; General function prediction only ;}	{GO:0055114; oxidation-reduction process; biological_process GO:0050660; flavin adenine dinucleotide binding; molecular_function GO:0016021; integral to membrane; cellular_component GO:0016491; oxidoreductase activity; molecular_function GO:0071949; FAD binding; molecular_function GO:0005515; protein binding; molecular_function GO:0004506; squalene monooxygenase activity; molecular_function}	{XM_010668310.2; PREDICTED: Beta vulgaris subsp. vulgaris zeaxanthin epoxidase, chloroplastic (LOC104883753), mRNA}	{PF01494:FAD binding domain PF12831:FAD dependent oxidoreductase PF08491:Squalene epoxidase PF07992:Pyridine nucleotide-disulphide oxidoreductase PF01266:FAD dependent oxidoreductase PF00498:FHA domain}
transcript_HQ_SAB_transcript21015/f4p0/1544	-1.1804	2.1011e-15	6.6739e-15	{XP_010677116.1; PREDICTED: uncharacterized protein LOC104892808 [Beta vulgaris subsp. vulgaris]}	{sp|Q40412|ABA2_NICPL; Zeaxanthin epoxidase, chloroplastic OS=Nicotiana plumbaginifolia GN=ABA2 PE=1 SV=1}	{bvg:104892808; - - - - -}	{At2g35660; KOG2614 Kynurenine 3-monooxygenase and related flavoprotein monooxygenases CR Energy production and conversion ; General function prediction only ;}	{GO:0050660; flavin adenine dinucleotide binding; molecular_function GO:0055114; oxidation-reduction process; biological_process GO:0016021; integral to membrane; cellular_component GO:0071949; FAD binding; molecular_function GO:0004506; squalene monooxygenase activity; molecular_function}	{XM_010678814.2; PREDICTED: Beta vulgaris subsp. vulgaris FAD-dependent urate hydroxylase (LOC104892808), mRNA}	{PF08491:Squalene epoxidase PF01494:FAD binding domain}
transcript_HQ_BAB_transcript10066/f2p0/2558	4.3482	2.3552e-144	5.4278e-143	{XP_010666612.1; PREDICTED: zeaxanthin epoxidase, chloroplastic [Beta vulgaris subsp. vulgaris]}	{sp|O81360|ABA2_PRUAR; Zeaxanthin epoxidase, chloroplastic OS=Prunus armeniaca PE=2 SV=1}	{pper:PRUPE_ppa002248mg; K09838 ZEP, ABA1 zeaxanthin epoxidase 1.14.15.21 ko00906; Metabolism; Metabolism of terpenoids and polyketides; Carotenoid biosynthesis}	{At5g67030; KOG2614 Kynurenine 3-monooxygenase and related flavoprotein monooxygenases CR Energy production and conversion ; General function prediction only ;}	{GO:0016021; integral to membrane; cellular_component GO:0004506; squalene monooxygenase activity; molecular_function GO:0071949; FAD binding; molecular_function GO:0055114; oxidation-reduction process; biological_process GO:0050660; flavin adenine dinucleotide binding; molecular_function GO:0016491; oxidoreductase activity; molecular_function}	{XM_010668310.2; PREDICTED: Beta vulgaris subsp. vulgaris zeaxanthin epoxidase, chloroplastic (LOC104883753), mRNA}	{PF01266:FAD dependent oxidoreductase PF12831:FAD dependent oxidoreductase PF08491:Squalene epoxidase PF07992:Pyridine nucleotide-disulphide oxidoreductase PF01494:FAD binding domain}
transcript_HQ_SAB_transcript27377/f3p0/1097	1.2099	5.6103e-08	1.2771e-07	{XP_010677151.1; PREDICTED: calcineurin B-like protein 1 [Beta vulgaris subsp. vulgaris]}	{sp|O81445|CNBL1_ARATH; Calcineurin B-like protein 1 OS=Arabidopsis thaliana GN=CBL1 PE=1 SV=3}	{bvg:104892839; K06268 PPP3R, CNB serine/threonine-protein phosphatase 2B regulatory subunit - ko04010; Environmental Information Processing; Signal transduction; MAPK signaling pathway | ko04310; Environmental Information Processing; Signal transduction; Wnt signaling pathway | ko04370; Environmental Information Processing; Signal transduction; VEGF signaling pathway | ko04020; Environmental Inf…	{At5g47100; KOG0034 Ca2+/Calmodulin-dependent protein phosphatase (calcineurin subunit B), EF-Hand superfamily protein T Signal transduction mechanisms ;}	{GO:0005509; calcium ion binding; molecular_function GO:0000272; polysaccharide catabolic process; biological_process GO:0004553; hydrolase activity, hydrolyzing O-glycosyl compounds; molecular_function GO:0005515; protein binding; molecular_function GO:0005578; proteinaceous extracellular matrix; cellular_component GO:0007165; signal transduction; biological_process}	{XM_019249515.1; PREDICTED: Beta vulgaris subsp. vulgaris calcineurin B-like protein 1 (LOC104892839), transcript variant X2, mRNA}	{PF10591:Secreted protein acidic and rich in cysteine Ca binding region PF13202:EF hand PF00404:Dockerin type I repeat PF13405:EF-hand domain PF13499:EF-hand domain pair PF00036:EF hand PF13833:EF-hand domain pair PF12763:Cytoskeletal-regulatory complex EF hand}
transcript_HQ_SAB_transcript27153/f5p0/1134	1.9717	1.045e-42	6.8543e-42	{XP_010677151.1; PREDICTED: calcineurin B-like protein 1 [Beta vulgaris subsp. vulgaris]}	{sp|O81445|CNBL1_ARATH; Calcineurin B-like protein 1 OS=Arabidopsis thaliana GN=CBL1 PE=1 SV=3}	{bvg:104892839; K06268 PPP3R, CNB serine/threonine-protein phosphatase 2B regulatory subunit - ko04010; Environmental Information Processing; Signal transduction; MAPK signaling pathway | ko04310; Environmental Information Processing; Signal transduction; Wnt signaling pathway | ko04370; Environmental Information Processing; Signal transduction; VEGF signaling pathway | ko04020; Environmental Inf…	{At5g47100; KOG0034 Ca2+/Calmodulin-dependent protein phosphatase (calcineurin subunit B), EF-Hand superfamily protein T Signal transduction mechanisms ;}	{GO:0005509; calcium ion binding; molecular_function GO:0000272; polysaccharide catabolic process; biological_process GO:0004553; hydrolase activity, hydrolyzing O-glycosyl compounds; molecular_function GO:0005578; proteinaceous extracellular matrix; cellular_component GO:0005515; protein binding; molecular_function GO:0007165; signal transduction; biological_process}	{XM_010678849.2; PREDICTED: Beta vulgaris subsp. vulgaris calcineurin B-like protein 1 (LOC104892839), transcript variant X1, mRNA}	{PF13202:EF hand PF10591:Secreted protein acidic and rich in cysteine Ca binding region PF13833:EF-hand domain pair PF00036:EF hand PF12763:Cytoskeletal-regulatory complex EF hand PF13405:EF-hand domain PF13499:EF-hand domain pair PF00404:Dockerin type I repeat}
transcript_HQ_SAB_transcript26223/f4p0/1207	-1.4223	3.1296e-11	8.3628e-11	{KNA18163.1; hypothetical protein SOVF_073430 [Spinacia oleracea]}	{sp|Q3HRP0|CNBL7_ORYSJ; Calcineurin B-like protein 7 OS=Oryza sativa subsp. japonica GN=CBL7 PE=2 SV=1}	{bvg:104883533; K06268 PPP3R, CNB serine/threonine-protein phosphatase 2B regulatory subunit - ko04010; Environmental Information Processing; Signal transduction; MAPK signaling pathway | ko04310; Environmental Information Processing; Signal transduction; Wnt signaling pathway | ko04370; Environmental Information Processing; Signal transduction; VEGF signaling pathway | ko04020; Environmental Inf…	{At5g24270; KOG0034 Ca2+/Calmodulin-dependent protein phosphatase (calcineurin subunit B), EF-Hand superfamily protein T Signal transduction mechanisms ;}	{GO:0007165; signal transduction; biological_process GO:0005515; protein binding; molecular_function GO:0005578; proteinaceous extracellular matrix; cellular_component GO:0005509; calcium ion binding; molecular_function}	{XM_010668144.2; PREDICTED: Beta vulgaris subsp. vulgaris calcineurin B-like protein 4 (LOC104883533), transcript variant X2, mRNA}	{PF13499:EF-hand domain pair PF13405:EF-hand domain PF10591:Secreted protein acidic and rich in cysteine Ca binding region PF12763:Cytoskeletal-regulatory complex EF hand PF13202:EF hand PF00036:EF hand PF13833:EF-hand domain pair}
transcript_HQ_BAB_transcript19580/f3p0/1381	Inf	3.1224e-48	2.2636e-47	{KNA18163.1; hypothetical protein SOVF_073430 [Spinacia oleracea]}	{sp|Q3HRP0|CNBL7_ORYSJ; Calcineurin B-like protein 7 OS=Oryza sativa subsp. japonica GN=CBL7 PE=2 SV=1}	{bvg:104883533; K06268 PPP3R, CNB serine/threonine-protein phosphatase 2B regulatory subunit - ko04010; Environmental Information Processing; Signal transduction; MAPK signaling pathway | ko04310; Environmental Information Processing; Signal transduction; Wnt signaling pathway | ko04370; Environmental Information Processing; Signal transduction; VEGF signaling pathway | ko04020; Environmental Inf…	{At5g24270; KOG0034 Ca2+/Calmodulin-dependent protein phosphatase (calcineurin subunit B), EF-Hand superfamily protein T Signal transduction mechanisms ;}	{GO:0005509; calcium ion binding; molecular_function GO:0005515; protein binding; molecular_function GO:0005578; proteinaceous extracellular matrix; cellular_component GO:0007165; signal transduction; biological_process}	{XM_010668144.2; PREDICTED: Beta vulgaris subsp. vulgaris calcineurin B-like protein 4 (LOC104883533), transcript variant X2, mRNA}	{PF13833:EF-hand domain pair PF13202:EF hand PF12763:Cytoskeletal-regulatory complex EF hand PF13405:EF-hand domain PF13499:EF-hand domain pair PF00036:EF hand PF10591:Secreted protein acidic and rich in cysteine Ca binding region}
transcript_HQ_BAB_transcript15375/f4p0/1967	Inf	7.1832e-113	1.2199e-111	{KNA18163.1; hypothetical protein SOVF_073430 [Spinacia oleracea]}	{sp|Q3HRP0|CNBL7_ORYSJ; Calcineurin B-like protein 7 OS=Oryza sativa subsp. japonica GN=CBL7 PE=2 SV=1}	{bvg:104883533; K06268 PPP3R, CNB serine/threonine-protein phosphatase 2B regulatory subunit - ko04010; Environmental Information Processing; Signal transduction; MAPK signaling pathway | ko04310; Environmental Information Processing; Signal transduction; Wnt signaling pathway | ko04370; Environmental Information Processing; Signal transduction; VEGF signaling pathway | ko04020; Environmental Inf…	{At5g24270; KOG0034 Ca2+/Calmodulin-dependent protein phosphatase (calcineurin subunit B), EF-Hand superfamily protein T Signal transduction mechanisms ;}	{GO:0005509; calcium ion binding; molecular_function GO:0007165; signal transduction; biological_process GO:0005515; protein binding; molecular_function GO:0005578; proteinaceous extracellular matrix; cellular_component}	{XM_010668144.2; PREDICTED: Beta vulgaris subsp. vulgaris calcineurin B-like protein 4 (LOC104883533), transcript variant X2, mRNA}	{PF12763:Cytoskeletal-regulatory complex EF hand PF13405:EF-hand domain PF13833:EF-hand domain pair PF13202:EF hand PF10591:Secreted protein acidic and rich in cysteine Ca binding region PF00036:EF hand PF13499:EF-hand domain pair}
transcript_HQ_SAB_transcript9507/f2p0/2340	-1.1282	7.3701e-15	2.2969e-14	{KNA11350.1; hypothetical protein SOVF_136020 [Spinacia oleracea]}	{sp|Q09011|CAST_SOLTU; Calcium-binding protein CAST OS=Solanum tuberosum PE=2 SV=1}	{mus:104000021; K13448 CML calcium-binding protein CML - ko04626; Organismal Systems; Environmental adaptation; Plant-pathogen interaction}	{At4g20780; KOG0027 Calmodulin and related proteins (EF-Hand superfamily) T Signal transduction mechanisms ;}	{GO:0007040; lysosome organization; biological_process GO:0031902; late endosome membrane; cellular_component GO:0005578; proteinaceous extracellular matrix; cellular_component GO:0045121; membrane raft; cellular_component GO:0001919; regulation of receptor recycling; biological_process GO:0032008; positive regulation of TOR signaling cascade; biological_process GO:0005509; calcium ion binding; m…	{XM_010685119.2; PREDICTED: Beta vulgaris subsp. vulgaris probable calcium-binding protein CML43 (LOC104898106), mRNA}	{PF13202:EF hand PF00036:EF hand PF13833:EF-hand domain pair PF13499:EF-hand domain pair PF10591:Secreted protein acidic and rich in cysteine Ca binding region PF13405:EF-hand domain PF15454:Late endosomal/lysosomal adaptor and MAPK and MTOR activator}
transcript_HQ_SAB_transcript377/f2p0/4650	-1.1218	7.92e-07	1.6813e-06	{XP_010690543.1; PREDICTED: epidermal growth factor receptor substrate 15-like 1 isoform X1 [Beta vulgaris subsp. vulgaris]}	{sp|Q9HGL2|YHLA_SCHPO; Uncharacterized calcium-binding protein C800.10c OS=Schizosaccharomyces pombe (strain 972 / ATCC 24843) GN=SPBC800.10c PE=4 SV=1}	{fve:101301734; - - - - -}	{At1g21630; KOG0998 Synaptic vesicle protein EHS-1 and related EH domain proteins TU Signal transduction mechanisms ; Intracellular trafficking, secretion, and vesicular transport ;}	{GO:0016021; integral to membrane; cellular_component GO:0005509; calcium ion binding; molecular_function GO:0005515; protein binding; molecular_function}	{XM_010692241.1; PREDICTED: Beta vulgaris subsp. vulgaris epidermal growth factor receptor substrate 15-like 1 (LOC104904066), transcript variant X1, mRNA}	{PF07851:TMPIT-like protein PF13833:EF-hand domain pair PF00036:EF hand PF12763:Cytoskeletal-regulatory complex EF hand PF13202:EF hand PF13405:EF-hand domain PF13499:EF-hand domain pair}
transcript_HQ_SAB_transcript372/f2p0/4669	2.7927	3.5281e-72	3.7668e-71	{XP_010690543.1; PREDICTED: epidermal growth factor receptor substrate 15-like 1 isoform X1 [Beta vulgaris subsp. vulgaris]}	{sp|Q9HGL2|YHLA_SCHPO; Uncharacterized calcium-binding protein C800.10c OS=Schizosaccharomyces pombe (strain 972 / ATCC 24843) GN=SPBC800.10c PE=4 SV=1}	{fve:101301734; - - - - -}	{At1g21630; KOG0998 Synaptic vesicle protein EHS-1 and related EH domain proteins TU Signal transduction mechanisms ; Intracellular trafficking, secretion, and vesicular transport ;}	{GO:0010508; positive regulation of autophagy; biological_process GO:0016021; integral to membrane; cellular_component GO:0005509; calcium ion binding; molecular_function GO:0005515; protein binding; molecular_function}	{XM_010692241.1; PREDICTED: Beta vulgaris subsp. vulgaris epidermal growth factor receptor substrate 15-like 1 (LOC104904066), transcript variant X1, mRNA}	{PF13833:EF-hand domain pair PF00036:EF hand PF12763:Cytoskeletal-regulatory complex EF hand PF13405:EF-hand domain PF10186:Vacuolar sorting 38 and autophagy-related subunit 14 PF13499:EF-hand domain pair PF07851:TMPIT-like protein PF13202:EF hand}
transcript_HQ_SAB_transcript30958/f4p0/765	-2.0184	1.6871e-42	1.1016e-41	{XP_010693254.1; PREDICTED: probable calcium-binding protein CML30 [Beta vulgaris subsp. vulgaris]}	{sp|Q93Z27|CML45_ARATH; Probable calcium-binding protein CML45 OS=Arabidopsis thaliana GN=CML45 PE=1 SV=1}	{thj:104805475; K02183 CALM Calmodulin - ko04014; Environmental Information Processing; Signal transduction; Ras signaling pathway | ko04015; Environmental Information Processing; Signal transduction; Rap1 signaling pathway | ko04016; Environmental Information Processing; Signal transduction; MAPK signaling pathway - plant | ko04371; Environmental Information Processing; Signal transduction; Apel…	{At5g39670; KOG0027 Calmodulin and related proteins (EF-Hand superfamily) T Signal transduction mechanisms ;}	{GO:0000398; nuclear mRNA splicing, via spliceosome; biological_process GO:0005509; calcium ion binding; molecular_function GO:0005681; spliceosomal complex; cellular_component GO:0007165; signal transduction; biological_process GO:0005578; proteinaceous extracellular matrix; cellular_component}	{XM_017759204.1; PREDICTED: Gossypium arboreum probable calcium-binding protein CML45 (LOC108459804), mRNA}	{PF04889:Cwf15/Cwc15 cell cycle control protein PF13499:EF-hand domain pair PF13405:EF-hand domain PF10591:Secreted protein acidic and rich in cysteine Ca binding region PF13202:EF hand PF00036:EF hand PF13833:EF-hand domain pair}
transcript_HQ_SAB_transcript29628/f2p0/912	2.7317	5.5288e-99	8.2254e-98	{KNA10488.1; hypothetical protein SOVF_143520 [Spinacia oleracea]}	{sp|Q9M7R0|ALL8_OLEEU; Calcium-binding allergen Ole e 8 OS=Olea europaea PE=1 SV=1}	{bvg:104888229; K13448 CML calcium-binding protein CML - ko04626; Organismal Systems; Environmental adaptation; Plant-pathogen interaction}	{At1g18210; KOG0027 Calmodulin and related proteins (EF-Hand superfamily) T Signal transduction mechanisms ;}	{GO:0005509; calcium ion binding; molecular_function GO:0007165; signal transduction; biological_process GO:0005578; proteinaceous extracellular matrix; cellular_component}	{NA}	{PF00036:EF hand PF13833:EF-hand domain pair PF13202:EF hand PF13405:EF-hand domain PF10591:Secreted protein acidic and rich in cysteine Ca binding region PF13499:EF-hand domain pair}
transcript_HQ_SAB_transcript29376/f3p0/947	0.36485	0.011213	0.016807	{XP_010671987.1; PREDICTED: probable calcium-binding protein CML13 [Beta vulgaris subsp. vulgaris]}	{sp|Q94AZ4|CML13_ARATH; Probable calcium-binding protein CML13 OS=Arabidopsis thaliana GN=CML13 PE=2 SV=1}	{bvg:104888659; K13448 CML calcium-binding protein CML - ko04626; Organismal Systems; Environmental adaptation; Plant-pathogen interaction}	{At1g12310; KOG0027 Calmodulin and related proteins (EF-Hand superfamily) T Signal transduction mechanisms ;}	{GO:0005509; calcium ion binding; molecular_function GO:0005515; protein binding; molecular_function}	{XM_010673685.1; PREDICTED: Beta vulgaris subsp. vulgaris probable calcium-binding protein CML13 (LOC104888659), mRNA}	{PF13202:EF hand PF12763:Cytoskeletal-regulatory complex EF hand PF00036:EF hand PF13833:EF-hand domain pair PF13499:EF-hand domain pair PF13405:EF-hand domain}
transcript_HQ_SAB_transcript28668/f2p0/1004	-1.0733	1.3264e-17	4.5414e-17	{KNA10488.1; hypothetical protein SOVF_143520 [Spinacia oleracea]}	{sp|Q9M7R0|ALL8_OLEEU; Calcium-binding allergen Ole e 8 OS=Olea europaea PE=1 SV=1}	{bvg:104888229; K13448 CML calcium-binding protein CML - ko04626; Organismal Systems; Environmental adaptation; Plant-pathogen interaction}	{At1g18210; KOG0027 Calmodulin and related proteins (EF-Hand superfamily) T Signal transduction mechanisms ;}	{GO:0005509; calcium ion binding; molecular_function GO:0005515; protein binding; molecular_function GO:0005578; proteinaceous extracellular matrix; cellular_component GO:0007165; signal transduction; biological_process}	{NA}	{PF13833:EF-hand domain pair PF00036:EF hand PF13202:EF hand PF12763:Cytoskeletal-regulatory complex EF hand PF13405:EF-hand domain PF10591:Secreted protein acidic and rich in cysteine Ca binding region PF13499:EF-hand domain pair}
transcript_HQ_SAB_transcript27373/f3p0/1044	2.0345	1.9378e-41	1.2384e-40	{XP_010680927.1; PREDICTED: probable calcium-binding protein CML41 [Beta vulgaris subsp. vulgaris]}	{sp|Q8L3R2|CML41_ARATH; Probable calcium-binding protein CML41 OS=Arabidopsis thaliana GN=CML41 PE=2 SV=2}	{sly:101253669; K13448 CML calcium-binding protein CML - ko04626; Organismal Systems; Environmental adaptation; Plant-pathogen interaction}	{At3g50770; KOG0027 Calmodulin and related proteins (EF-Hand superfamily) T Signal transduction mechanisms ;}	{GO:0004553; hydrolase activity, hydrolyzing O-glycosyl compounds; molecular_function GO:0005515; protein binding; molecular_function GO:0005509; calcium ion binding; molecular_function GO:0000272; polysaccharide catabolic process; biological_process}	{NA}	{PF00404:Dockerin type I repeat PF13405:EF-hand domain PF13499:EF-hand domain pair PF00036:EF hand PF13833:EF-hand domain pair PF12763:Cytoskeletal-regulatory complex EF hand PF13202:EF hand}
transcript_HQ_SAB_transcript27369/f3p0/1045	0.70302	3.0671e-06	6.2825e-06	{XP_010674374.1; PREDICTED: caltractin isoform X2 [Beta vulgaris subsp. vulgaris]}	{sp|P41210|CATR_ATRNU; Caltractin OS=Atriplex nummularia PE=2 SV=1}	{bvg:104890543; K13448 CML calcium-binding protein CML - ko04626; Organismal Systems; Environmental adaptation; Plant-pathogen interaction}	{At3g50360; KOG0028 Ca2+-binding protein (centrin/caltractin), EF-Hand superfamily protein ZD Cytoskeleton ; Cell cycle control, cell division, chromosome partitioning ;}	{GO:0003899; DNA-directed RNA polymerase activity; molecular_function GO:0005509; calcium ion binding; molecular_function GO:0006351; transcription, DNA-dependent; biological_process GO:0005578; proteinaceous extracellular matrix; cellular_component GO:0005515; protein binding; molecular_function GO:0007165; signal transduction; biological_process}	{XM_010676072.2; PREDICTED: Beta vulgaris subsp. vulgaris caltractin (LOC104890543), transcript variant X2, mRNA}	{PF10591:Secreted protein acidic and rich in cysteine Ca binding region PF03874:RNA polymerase Rpb4 PF13202:EF hand PF13405:EF-hand domain PF13499:EF-hand domain pair PF13833:EF-hand domain pair PF00036:EF hand PF12763:Cytoskeletal-regulatory complex EF hand}
transcript_HQ_SAB_transcript26594/f4p0/1200	2.4091	2.8967e-65	2.8066e-64	{AEX86943.1; EFh calcium-binding protein [Haloxylon ammodendron]}	{sp|Q9ZQH1|CML48_ARATH; Probable calcium-binding protein CML48 OS=Arabidopsis thaliana GN=CML48 PE=2 SV=2}	{pmum:103328045; K13448 CML calcium-binding protein CML - ko04626; Organismal Systems; Environmental adaptation; Plant-pathogen interaction}	{At2g27480; KOG0037 Ca2+-binding protein, EF-Hand protein superfamily T Signal transduction mechanisms ;}	{GO:0005509; calcium ion binding; molecular_function}	{JN886087.2; Haloxylon ammodendron calcium-dependent protein kinase (CDPK) mRNA, partial cds}	{PF13499:EF-hand domain pair PF13405:EF-hand domain PF13202:EF hand PF00036:EF hand PF13833:EF-hand domain pair}
[truncated: 260 more rows]
