# Supplementary material for: Characterization of the gene expression profile response to drought stress in Haloxylon using PacBio single-molecule real-time and Illumina sequencing
Source: Front Plant Sci. 2022 Aug 16;13:981029. doi: 10.3389/fpls.2022.981029 (PMC9424927; doi:10.3389/fpls.2022.981029)
Supplement: Supplementary file 5 [file Table_5.XLSX]

## Sheet: LS vs. HS
Table S3 Transcription factors response to drought stress in Haloxylon ammodendron
tf_id	Subfamily	tf_Family	gene_id	NR GI	NR ID	NR Score	NR Evalue	NR Description	NT GI	NT ID	NT Score	NT Evalue	NT Description	KO ID	KO Name	KO Description	Http Link	Swissprot ID	Swissprot Score	Swissprot Evalue	Swissprot Description	PFAM ID	PFAM description	Gene Ontology Biological Pathway	BP Description	Gene Ontology Molecular Function	MF Description	Gene Ontology Cellular Component	CC Description	KOG ID	KOG Description	UP_DOWN_REGULATION(LSvsHS)	log2FC(LSvsHS)	q value(LSvsHS)	CDS_flag
Cluster-6558.23362-0R	C3H	C3H	Cluster-6558.23362	1219138197	XP_021732480.1	1038	8.1e-110	zinc finger CCCH domain-containing protein 47-like [Chenopodium quinoa]	XM_010691294.2	XM_010691294	46	9.79218e-13	PREDICTED: Beta vulgaris subsp. vulgaris zinc finger CCCH domain-containing protein 29 (LOC104903273), mRNA	--	--	--	--	Q9LUZ4	682	5.9e-70	Zinc finger CCCH domain-containing protein 66 OS=Arabidopsis thaliana OX=3702 GN=At5g58620 PE=2 SV=1	PF00642//PF11744//PF00023//PF13606//PF12090	Zinc finger C-x8-C-x5-C-x3-H type (and similar)//Aluminium activated malate transporter//Ankyrin repeat//Ankyrin repeat//Spt20 family	GO:0015743	malate transport	GO:0046872//GO:0005515//GO:0003712	metal ion binding//protein binding//transcription coregulator activity	GO:0000124//GO:0005667	SAGA complex//transcription regulator complex	--	--	UP	2.2863	0	blast,frame:-1 start:2017 end:434
Cluster-6558.21897-2R	C2H2	C2H2	Cluster-6558.21897	1219067167	XP_021759526.1	695	2.8e-70	zinc finger protein ZAT10-like [Chenopodium quinoa]	XM_021903834.1	XM_021903834	126	1.94367e-57	PREDICTED: Chenopodium quinoa zinc finger protein ZAT10-like (LOC110724416), mRNA	--	--	--	--	Q96289	358	1.3e-32	Zinc finger protein ZAT10 OS=Arabidopsis thaliana OX=3702 GN=ZAT10 PE=2 SV=1	PF00096	Zinc finger, C2H2 type	--	--	GO:0003676	nucleic acid binding	--	--	--	--	UP	1.9695	0	blast,frame:-3 start:1246 end:290
Cluster-6558.22544-2R	Jumonji	Jumonji	Cluster-6558.22544	870860001	KMT11364.1	1782	1e-195	hypothetical protein BVRB_5g106970 [Beta vulgaris subsp. vulgaris]	XM_010679065.2	XM_010679065	816	0	PREDICTED: Beta vulgaris subsp. vulgaris lysine-specific demethylase JMJ706 (LOC104893026), mRNA	--	--	--	--	Q336N8	1351	3.7e-147	Lysine-specific demethylase JMJ706 OS=Oryza sativa subsp. japonica OX=39947 GN=JMJ706 PE=2 SV=1	--	--	--	--	--	--	--	--	KOG1246	DNA-binding protein jumonji/RBP2/SMCY, contains JmjC domain	DOWN	-1.1	2.7664e-259	blast,frame:-3 start:5487 end:4207|blast,frame:-2 start:1024 end:569
Cluster-6558.20219-0R	DBP	DBP	Cluster-6558.20219	1219165308	XP_021746287.1	912	4.7e-95	probable protein phosphatase 2C 22 isoform X1 [Chenopodium quinoa]	XM_022004987.1	XM_022004987	378	0	PREDICTED: Spinacia oleracea probable protein phosphatase 2C 22 (LOC110799711), transcript variant X2, mRNA	K14803	PTC2_3	protein phosphatase PTC2/3	http://www.genome.jp/dbget-bin/www_bget?ko:K14803	Q9SLA1	787	5.6e-82	Probable protein phosphatase 2C 22 OS=Arabidopsis thaliana OX=3702 GN=At2g25620 PE=1 SV=1	PF00481	Protein phosphatase 2C	--	--	GO:0003824	catalytic activity	--	--	--	--	DOWN	-1.4904	0	blast,frame:-1 start:1047 end:451
Cluster-6558.22820-2F	AP2/ERF-ERF	AP2/ERF->AP2/ERF-ERF	Cluster-6558.22820	1226854234	XP_021840409.1	587	1e-57	ethylene-responsive transcription factor 4-like [Spinacia oleracea]	XM_028390212.1	XM_028390212	38	1.70493e-08	PREDICTED: Glycine soja ethylene-responsive transcription factor 3-like (LOC114423450), mRNA	K09286	EREBP	EREBP-like factor	http://www.genome.jp/dbget-bin/www_bget?ko:K09286	Q9LW49	242	3.9e-19	Ethylene-responsive transcription factor 4 OS=Nicotiana sylvestris OX=4096 GN=ERF4 PE=2 SV=1	PF00424//PF00847	REV protein (anti-repression trans-activator protein)//AP2 domain	GO:0006355	regulation of transcription, DNA-templated	GO:0003700	DNA-binding transcription factor activity	GO:0005667//GO:0042025	transcription regulator complex//host cell nucleus	--	--	UP	1.3101	0	blast,frame:3 start:12 end:905
Cluster-6558.21176-2F	C3H	C3H	Cluster-6558.21176	1219135731	XP_021731198.1	1449	1.6e-157	zinc finger CCCH domain-containing protein 48-like [Chenopodium quinoa]	XM_019252191.1	XM_019252191	382	0	PREDICTED: Beta vulgaris subsp. vulgaris zinc finger CCCH domain-containing protein 48 (LOC104905489), mRNA	--	--	--	--	Q9FNZ2	845	6.5e-89	Zinc finger CCCH domain-containing protein 48 OS=Arabidopsis thaliana OX=3702 GN=ZFWD1 PE=2 SV=1	PF07569//PF00642//PF12009//PF00400	TUP1-like enhancer of split//Zinc finger C-x8-C-x5-C-x3-H type (and similar)//Telomerase ribonucleoprotein complex - RNA binding domain//WD domain, G-beta repeat	GO:0006355//GO:0006278	regulation of transcription, DNA-templated//RNA-dependent DNA biosynthetic process	GO:0046872//GO:0003964//GO:0005515	metal ion binding//RNA-directed DNA polymerase activity//protein binding	--	--	KOG0274	Cdc4 and related F-box and WD-40 proteins	DOWN	-1.4493	0	blast,frame:1 start:1810 end:1947|blast,frame:3 start:477 end:1694|blast,frame:2 start:1967 end:2218
Cluster-6558.19838-1F	SNF2	SNF2	Cluster-6558.19838	1219154031	XP_021740504.1	4089	0	helicase-like transcription factor CHR28 [Chenopodium quinoa]	XM_021992058.1	XM_021992058	1530	0	PREDICTED: Spinacia oleracea helicase-like transcription factor CHR28 (LOC110787432), mRNA	--	--	--	--	Q94BR5	1848	6.6e-205	Helicase-like transcription factor CHR28 OS=Arabidopsis thaliana OX=3702 GN=CHR28 PE=1 SV=1	PF02499//PF12678//PF00176//PF00097	Probable DNA packing protein, C-terminus//RING-H2 zinc finger domain//SNF2 family N-terminal domain//Zinc finger, C3HC4 type (RING finger)	GO:0006323	DNA packaging	GO:0046872//GO:0005524//GO:0008270	metal ion binding//ATP binding//zinc ion binding	--	--	KOG1001	Helicase-like transcription factor HLTF/DNA helicase RAD5, DEAD-box superfamily	DOWN	-1.1428	3.0451e-208	blast,frame:2 start:395 end:4096
Cluster-6558.22406-2R	LOB	LOB	Cluster-6558.22406	1226849439	XP_021838468.1	417	5.1e-38	LOB domain-containing protein 40-like [Spinacia oleracea]	XM_021982776.1	XM_021982776	226	5.1918e-113	PREDICTED: Spinacia oleracea LOB domain-containing protein 40-like (LOC110778211), mRNA	--	--	--	--	Q9M886	219	1.8e-16	LOB domain-containing protein 41 OS=Arabidopsis thaliana OX=3702 GN=LBD41 PE=2 SV=1	PF11112	Pyocin activator protein PrtN	GO:0006355	regulation of transcription, DNA-templated	--	--	--	--	--	--	DOWN	-1.2211	4.7568e-210	blast,frame:-3 start:1509 end:886
Cluster-6558.25058-2R	Jumonji	Jumonji	Cluster-6558.25058	731312721	XP_010676049.1	3913	0	PREDICTED: F-box protein At1g78280 [Beta vulgaris subsp. vulgaris]	XM_021887880.1	XM_021887880	889	0	PREDICTED: Chenopodium quinoa F-box protein At1g78280-like (LOC110709663), transcript variant X2, mRNA	--	--	--	--	Q9M9E8	2786	0	F-box protein At1g78280 OS=Arabidopsis thaliana OX=3702 GN=At1g78280 PE=2 SV=3	PF00646//PF00190//PF12937	F-box domain//Cupin//F-box-like	--	--	GO:0005515//GO:0045735	protein binding//nutrient reservoir activity	--	--	KOG2131	Uncharacterized conserved protein, contains JmjC domain	DOWN	-1.6653	0	blast,frame:-1 start:805 end:692
Cluster-6558.25743-2R	GRAS	GRAS	Cluster-6558.25743	1219091069	XP_021771709.1	2178	7.5e-242	scarecrow-like protein 1 [Chenopodium quinoa]	XM_019252226.1	XM_019252226	941	0	PREDICTED: Beta vulgaris subsp. vulgaris scarecrow-like protein 1 (LOC104905710), partial mRNA	--	--	--	--	Q9SDQ3	1413	1.5e-154	Scarecrow-like protein 1 OS=Arabidopsis thaliana OX=3702 GN=SCL1 PE=2 SV=1	--	--	--	--	--	--	--	--	--	--	DOWN	-1.2744	1.4625e-234	blast,frame:-3 start:2071 end:368
Cluster-6558.22190-2R	Jumonji	Jumonji	Cluster-6558.22190	1219112940	XP_021719738.1	919	7.4e-96	lysine-specific demethylase JMJ25-like [Chenopodium quinoa]	XR_002504435.1	XR_002504435	323	1.48312e-166	PREDICTED: Chenopodium quinoa lysine-specific demethylase JMJ25-like (LOC110687400), transcript variant X2, misc_RNA	--	--	--	--	Q9SSE9	579	7.5e-58	Lysine-specific demethylase JMJ25 OS=Arabidopsis thaliana OX=3702 GN=JMJ25 PE=1 SV=1	PF01554	MatE	GO:0055085//GO:0006810	transmembrane transport//transport	GO:0015297//GO:0042910	antiporter activity//xenobiotic transmembrane transporter activity	GO:0016020	membrane	--	--	DOWN	-1.9235	0	blast,frame:-1 start:2292 end:1561|blast,frame:-3 start:1309 end:1157
Cluster-6558.23969-0R	WRKY	WRKY	Cluster-6558.23969	1226824235	XP_021861300.1	805	1e-82	probable WRKY transcription factor 33 [Spinacia oleracea]	XM_021875508.1	XM_021875508	277	4.64069e-141	PREDICTED: Chenopodium quinoa probable WRKY transcription factor 33 (LOC110698105), mRNA	K13424	WRKY33	WRKY transcription factor 33	http://www.genome.jp/dbget-bin/www_bget?ko:K13424	Q8S8P5	403	1.6e-37	Probable WRKY transcription factor 33 OS=Arabidopsis thaliana OX=3702 GN=WRKY33 PE=1 SV=2	PF03106	WRKY DNA -binding domain	GO:0006355	regulation of transcription, DNA-templated	GO:0043565//GO:0003700	sequence-specific DNA binding//DNA-binding transcription factor activity	GO:0005667	transcription regulator complex	--	--	UP	1.3732	0	blast,frame:-1 start:1054 end:842|blast,frame:-3 start:1793 end:1134|blast,frame:-2 start:714 end:316
Cluster-6558.23969-1R	WRKY	WRKY	Cluster-6558.23969	1226824235	XP_021861300.1	805	1e-82	probable WRKY transcription factor 33 [Spinacia oleracea]	XM_021875508.1	XM_021875508	277	4.64069e-141	PREDICTED: Chenopodium quinoa probable WRKY transcription factor 33 (LOC110698105), mRNA	K13424	WRKY33	WRKY transcription factor 33	http://www.genome.jp/dbget-bin/www_bget?ko:K13424	Q8S8P5	403	1.6e-37	Probable WRKY transcription factor 33 OS=Arabidopsis thaliana OX=3702 GN=WRKY33 PE=1 SV=2	PF03106	WRKY DNA -binding domain	GO:0006355	regulation of transcription, DNA-templated	GO:0043565//GO:0003700	sequence-specific DNA binding//DNA-binding transcription factor activity	GO:0005667	transcription regulator complex	--	--	UP	1.3732	0	blast,frame:-1 start:1054 end:842|blast,frame:-3 start:1793 end:1134|blast,frame:-2 start:714 end:316
Cluster-6558.23969-2R	WRKY	WRKY	Cluster-6558.23969	1226824235	XP_021861300.1	805	1e-82	probable WRKY transcription factor 33 [Spinacia oleracea]	XM_021875508.1	XM_021875508	277	4.64069e-141	PREDICTED: Chenopodium quinoa probable WRKY transcription factor 33 (LOC110698105), mRNA	K13424	WRKY33	WRKY transcription factor 33	http://www.genome.jp/dbget-bin/www_bget?ko:K13424	Q8S8P5	403	1.6e-37	Probable WRKY transcription factor 33 OS=Arabidopsis thaliana OX=3702 GN=WRKY33 PE=1 SV=2	PF03106	WRKY DNA -binding domain	GO:0006355	regulation of transcription, DNA-templated	GO:0043565//GO:0003700	sequence-specific DNA binding//DNA-binding transcription factor activity	GO:0005667	transcription regulator complex	--	--	UP	1.3732	0	blast,frame:-1 start:1054 end:842|blast,frame:-3 start:1793 end:1134|blast,frame:-2 start:714 end:316
Cluster-6558.21518-1R	WRKY	WRKY	Cluster-6558.21518	1226842028	XP_021835811.1	326	2.4e-27	WRKY transcription factor WRKY51-like [Spinacia oleracea]	XM_021899882.1	XM_021899882	96	1.28185e-40	PREDICTED: Chenopodium quinoa WRKY transcription factor WRKY51-like (LOC110720830), mRNA	--	--	--	--	Q9SV15	245	2.3e-19	Probable WRKY transcription factor 11 OS=Arabidopsis thaliana OX=3702 GN=WRKY11 PE=2 SV=2	PF02950//PF03345//PF03106//PF00906	Conotoxin//Oligosaccharyltransferase 48 kDa subunit beta//WRKY DNA -binding domain//Hepatitis core antigen	GO:0006355//GO:0006810//GO:0018279//GO:0009405	regulation of transcription, DNA-templated//transport//protein N-linked glycosylation via asparagine//pathogenesis	GO:0043565//GO:0003700//GO:0008200//GO:0005198	sequence-specific DNA binding//DNA-binding transcription factor activity//ion channel inhibitor activity//structural molecule activity	GO:0005789//GO:0005667//GO:0005576	endoplasmic reticulum membrane//transcription regulator complex//extracellular region	--	--	UP	1.3149	0	blast,frame:-2 start:664 end:377|blast,frame:-3 start:1752 end:772
Cluster-6558.21518-2R	WRKY	WRKY	Cluster-6558.21518	1226842028	XP_021835811.1	326	2.4e-27	WRKY transcription factor WRKY51-like [Spinacia oleracea]	XM_021899882.1	XM_021899882	96	1.28185e-40	PREDICTED: Chenopodium quinoa WRKY transcription factor WRKY51-like (LOC110720830), mRNA	--	--	--	--	Q9SV15	245	2.3e-19	Probable WRKY transcription factor 11 OS=Arabidopsis thaliana OX=3702 GN=WRKY11 PE=2 SV=2	PF02950//PF03345//PF03106//PF00906	Conotoxin//Oligosaccharyltransferase 48 kDa subunit beta//WRKY DNA -binding domain//Hepatitis core antigen	GO:0006355//GO:0006810//GO:0018279//GO:0009405	regulation of transcription, DNA-templated//transport//protein N-linked glycosylation via asparagine//pathogenesis	GO:0043565//GO:0003700//GO:0008200//GO:0005198	sequence-specific DNA binding//DNA-binding transcription factor activity//ion channel inhibitor activity//structural molecule activity	GO:0005789//GO:0005667//GO:0005576	endoplasmic reticulum membrane//transcription regulator complex//extracellular region	--	--	UP	1.3149	0	blast,frame:-2 start:664 end:377|blast,frame:-3 start:1752 end:772
Cluster-6558.26745-2R	AP2/ERF-ERF	AP2/ERF->AP2/ERF-ERF	Cluster-6558.26745	1279025578	XP_022871987.1	243	2.8e-17	ethylene-responsive transcription factor ERF110-like [Olea europaea var. sylvestris]	FP091407.1	FP091407	89	2.7966e-36	Phyllostachys edulis cDNA clone: bphyem102c19, full insert sequence	--	--	--	--	Q70II3	186	4.4e-12	Ethylene-responsive transcription factor ERF110 OS=Arabidopsis thaliana OX=3702 GN=ERF110 PE=2 SV=2	--	--	--	--	--	--	--	--	--	--	DOWN	-1.821	2.7228e-300	blast,frame:-3 start:1407 end:589
Cluster-6558.25759-2R	GRAS	GRAS	Cluster-6558.25759	731329977	XP_010675879.1	2088	1.6e-231	PREDICTED: scarecrow-like protein 21 [Beta vulgaris subsp. vulgaris]	XM_021883869.1	XM_021883869	814	0	PREDICTED: Chenopodium quinoa scarecrow-like protein 21 (LOC110705950), mRNA	--	--	--	--	Q9LDL7	1484	6.6e-163	Scarecrow-like transcription factor PAT1 OS=Arabidopsis thaliana OX=3702 GN=PAT1 PE=2 SV=1	PF05180	DNL zinc finger	--	--	GO:0008270	zinc ion binding	--	--	--	--	UP	1.0713	6.1491e-189	--
Cluster-6558.22440-0F	bHLH	bHLH	Cluster-6558.22440	1431559107	XP_025606491.1	157	3.8e-08	transcription factor bHLH35 [Arachis hypogaea]	--	--	--	--	--	--	--	--	--	Q2HIV9	147	2.1e-08	Transcription factor bHLH35 OS=Arabidopsis thaliana OX=3702 GN=BHLH35 PE=2 SV=1	--	--	--	--	--	--	--	--	--	--	DOWN	-1.4253	1.7887e-185	--
Cluster-6558.22107-2R	AP2/ERF-ERF	AP2/ERF->AP2/ERF-ERF	Cluster-6558.22107	1219176854	XP_021752063.1	633	2.6e-63	LOW QUALITY PROTEIN: ethylene-responsive transcription factor ERF010-like [Chenopodium quinoa]	XM_021896371.1	XM_021896371	239	1.7375e-120	PREDICTED: Chenopodium quinoa ethylene-responsive transcription factor ERF010-like (LOC110717625), mRNA	K09286	EREBP	EREBP-like factor	http://www.genome.jp/dbget-bin/www_bget?ko:K09286	Q9FH94	402	6.1e-38	Ethylene-responsive transcription factor ERF010 OS=Arabidopsis thaliana OX=3702 GN=ERF010 PE=2 SV=1	PF01312//PF00847//PF03857	FlhB HrpN YscU SpaS Family//AP2 domain//Colicin immunity protein	GO:0006955//GO:0006355//GO:0030153//GO:0009306	immune response//regulation of transcription, DNA-templated//bacteriocin immunity//protein secretion	GO:0015643//GO:0003700	toxic substance binding//DNA-binding transcription factor activity	GO:0016020//GO:0019814//GO:0005667	membrane//immunoglobulin complex//transcription regulator complex	--	--	DOWN	-1.3127	4.5581e-152	blast,frame:-3 start:828 end:94
Cluster-6558.22010-1R	HB-BELL	HB->HB-BELL	Cluster-6558.22010	1219114528	XP_021720564.1	2249	4.4e-250	BEL1-like homeodomain protein 1 [Chenopodium quinoa]	XM_021864872.1	XM_021864872	720	0	PREDICTED: Chenopodium quinoa BEL1-like homeodomain protein 1 (LOC110688164), mRNA	--	--	--	--	Q9SJ56	838	6.8e-88	BEL1-like homeodomain protein 1 OS=Arabidopsis thaliana OX=3702 GN=BLH1 PE=1 SV=1	PF05920//PF00046	Homeobox KN domain//Homeodomain	GO:0006355	regulation of transcription, DNA-templated	GO:0003677	DNA binding	--	--	--	--	UP	1.1274	1.3203e-203	--
Cluster-6558.29563-1F	AUX/IAA	AUX/IAA	Cluster-6558.29563	870858786	KMT10274.1	915	1.5e-95	hypothetical protein BVRB_5g120300 [Beta vulgaris subsp. vulgaris]	XM_021908617.1	XM_021908617	703	0	PREDICTED: Chenopodium quinoa auxin-induced protein 22D-like (LOC110728948), mRNA	K14484	IAA	auxin-responsive protein IAA	http://www.genome.jp/dbget-bin/www_bget?ko:K14484	O24542	642	2.6e-65	Auxin-induced protein 22D OS=Vigna radiata var. radiata OX=3916 GN=AUX22D PE=2 SV=1	PF00564//PF02297	PB1 domain//Cytochrome oxidase c subunit VIb	--	--	GO:0005515	protein binding	GO:0005739	mitochondrion	--	--	UP	1.0571	1.4903e-203	blast,frame:2 start:1376 end:1990
Cluster-6558.21957-0F	C2H2	C2H2	Cluster-6558.21957	870851812	KMT03820.1	545	5.7e-53	hypothetical protein BVRB_8g189640 [Beta vulgaris subsp. vulgaris]	XM_018615123.1	XM_018615123	47	1.28513e-13	PREDICTED: Raphanus sativus uncharacterized LOC108842259 (LOC108842259), mRNA	--	--	--	--	Q96289	295	2.1e-25	Zinc finger protein ZAT10 OS=Arabidopsis thaliana OX=3702 GN=ZAT10 PE=2 SV=1	PF00096	Zinc finger, C2H2 type	--	--	GO:0003676	nucleic acid binding	--	--	--	--	UP	1.0074	1.6437e-141	blast,frame:1 start:1 end:915
Cluster-6558.20014-0F	bHLH	bHLH	Cluster-6558.20014	1219082113	XP_021767200.1	1214	2.1e-130	transcription factor MYC2-like [Chenopodium quinoa]	XM_021911508.1	XM_021911508	170	7.45873e-82	PREDICTED: Chenopodium quinoa transcription factor MYC2-like (LOC110731636), mRNA	--	--	--	--	O23090	363	3.8e-33	Transcription factor bHLH14 OS=Arabidopsis thaliana OX=3702 GN=BHLH14 PE=1 SV=1	PF04281//PF00010//PF03821	Mitochondrial import receptor subunit Tom22//Helix-loop-helix DNA-binding domain//Golgi 4-transmembrane spanning transporter	GO:0006886	intracellular protein transport	GO:0046983	protein dimerization activity	GO:0005741//GO:0016021	mitochondrial outer membrane//integral component of membrane	--	--	DOWN	-2.4239	3.4212e-249	blast,frame:1 start:64 end:1560
Cluster-6558.20010-0F	Others	Others	Cluster-6558.20010	1219043898	XP_021762970.1	780	3.8e-80	two-component response regulator-like APRR5 isoform X1 [Chenopodium quinoa]	XM_021869986.1	XM_021869986	295	2.12744e-151	PREDICTED: Chenopodium quinoa two-component response regulator-like APRR5 (LOC110692910), transcript variant X3, mRNA	K12130	PRR5	pseudo-response regulator 5	http://www.genome.jp/dbget-bin/www_bget?ko:K12130	Q6LA42	163	5.1e-10	Two-component response regulator-like APRR5 OS=Arabidopsis thaliana OX=3702 GN=APRR5 PE=1 SV=2	PF06203	CCT motif	--	--	GO:0005515	protein binding	--	--	--	--	UP	1.2849	4.2598e-204	blast,frame:1 start:676 end:954|blast,frame:2 start:2 end:781
Cluster-6558.22882-2F	Trihelix	Trihelix	Cluster-6558.22882	1219148679	XP_021737784.1	718	5.2e-73	uncharacterized protein LOC110704305 [Chenopodium quinoa]	XM_022009836.1	XM_022009836	233	5.41159e-117	PREDICTED: Spinacia oleracea uncharacterized LOC110804265 (LOC110804265), mRNA	--	--	--	--	--	--	--	--	--	--	--	--	--	--	--	--	--	--	DOWN	-1.9391	1.943e-156	blast,frame:3 start:102 end:1292
Cluster-6558.19383-1R	Others	Others	Cluster-6558.19383	1219054482	XP_021752926.1	650	3.8e-65	two-component response regulator ORR10-like [Chenopodium quinoa]	XM_021897234.1	XM_021897234	253	3.90514e-128	PREDICTED: Chenopodium quinoa two-component response regulator ORR10-like (LOC110718397), mRNA	K14492	ARR-A	two-component response regulator ARR-A family	http://www.genome.jp/dbget-bin/www_bget?ko:K14492	B8BLZ4	399	1.8e-37	Two-component response regulator ORR10 OS=Oryza sativa subsp. indica OX=39946 GN=RR10 PE=2 SV=1	PF00072	Response regulator receiver domain	GO:0000160	phosphorelay signal transduction system	--	--	--	--	--	--	DOWN	-1.6076	6.9805e-95	blast,frame:-1 start:1225 end:947|blast,frame:-2 start:921 end:472
Cluster-6558.21735-2R	B3	B3->B3	Cluster-6558.21735	1219124264	XP_021725446.1	968	1.7e-101	uncharacterized membrane protein At3g27390-like [Chenopodium quinoa]	XM_021869754.1	XM_021869754	379	0	PREDICTED: Chenopodium quinoa uncharacterized membrane protein At3g27390-like (LOC110692712), mRNA	--	--	--	--	Q8GUM4	391	5.2e-36	Uncharacterized membrane protein At3g27390 OS=Arabidopsis thaliana OX=3702 GN=At3g27390 PE=1 SV=2	PF03666//PF02362//PF03493//PF01080	Nitrogen Permease regulator of amino acid transport activity 3//B3 DNA binding domain//Calcium-activated BK potassium channel alpha subunit//Presenilin	GO:0034198//GO:0006813//GO:0016485//GO:0032007	cellular response to amino acid starvation//potassium ion transport//protein processing//negative regulation of TOR signaling	GO:0003677//GO:0004190	DNA binding//aspartic-type endopeptidase activity	GO:0016020//GO:0016021	membrane//integral component of membrane	--	--	DOWN	-1.1491	4.6766e-54	blast,frame:3 start:1254 end:1967|blast,frame:1 start:562 end:987
Cluster-6558.23259-0R	bHLH	bHLH	Cluster-6558.23259	1226779543	XP_021852436.1	548	7.7e-53	transcription factor bHLH71-like [Spinacia oleracea]	XM_010697260.2	XM_010697260	327	8.78426e-169	PREDICTED: Beta vulgaris subsp. vulgaris transcription factor bHLH71 (LOC104908174), mRNA	--	--	--	--	Q9SK91	333	2.5e-29	Transcription factor bHLH94 OS=Arabidopsis thaliana OX=3702 GN=BHLH94 PE=1 SV=2	PF00010	Helix-loop-helix DNA-binding domain	--	--	GO:0046983	protein dimerization activity	--	--	--	--	DOWN	-1.4588	1.4353e-84	blast,frame:-1 start:1365 end:796|blast,frame:-2 start:1520 end:1224
Cluster-6558.23345-1F	AP2/ERF-ERF	AP2/ERF->AP2/ERF-ERF	Cluster-6558.23345	1226816622	XP_021857554.1	787	4.6e-81	ethylene-responsive transcription factor ERF017-like [Spinacia oleracea]	XM_010689239.2	XM_010689239	115	1.88131e-51	PREDICTED: Beta vulgaris subsp. vulgaris ethylene-responsive transcription factor ERF017 (LOC104901646), mRNA	--	--	--	--	Q84QC2	458	2.5e-44	Ethylene-responsive transcription factor ERF017 OS=Arabidopsis thaliana OX=3702 GN=ERF017 PE=2 SV=1	PF00847//PF01429	AP2 domain//Methyl-CpG binding domain	GO:0006355	regulation of transcription, DNA-templated	GO:0003700//GO:0003677	DNA-binding transcription factor activity//DNA binding	GO:0005667//GO:0042025	transcription regulator complex//host cell nucleus	--	--	UP	3.1573	0	blast,frame:2 start:26 end:835
Cluster-6558.25232-0F	WRKY	WRKY	Cluster-6558.25232	1219051685	XP_021739597.1	504	9.3e-48	probable WRKY transcription factor 40 [Chenopodium quinoa]	XM_021883905.1	XM_021883905	186	2.01027e-90	PREDICTED: Chenopodium quinoa probable WRKY transcription factor 40 (LOC110705979), mRNA	--	--	--	--	Q9SAH7	245	3.8e-19	Probable WRKY transcription factor 40 OS=Arabidopsis thaliana OX=3702 GN=WRKY40 PE=1 SV=1	PF03106//PF01496	WRKY DNA -binding domain//V-type ATPase 116kDa subunit family	GO:1902600//GO:0006355	proton transmembrane transport//regulation of transcription, DNA-templated	GO:0015078//GO:0003700//GO:0043565	proton transmembrane transporter activity//DNA-binding transcription factor activity//sequence-specific DNA binding	GO:0033179//GO:0005667	proton-transporting V-type ATPase, V0 domain//transcription regulator complex	--	--	DOWN	-3.1025	5.1753e-188	blast,frame:1 start:229 end:684
Cluster-6558.21643-2R	GARP-G2-like	GARP->GARP-G2-like	Cluster-6558.21643	731338673	XP_010680444.1	704	4.1e-71	PREDICTED: myb family transcription factor EFM [Beta vulgaris subsp. vulgaris]	XM_010682142.2	XM_010682142	124	4.02584e-56	PREDICTED: Beta vulgaris subsp. vulgaris hypothetical protein (LOC104895588), mRNA	--	--	--	--	F4JRB0	314	2.6e-27	Transcription factor HHO5 OS=Arabidopsis thaliana OX=3702 GN=HHO5 PE=1 SV=1	PF02045//PF01285	CCAAT-binding transcription factor (CBF-B/NF-YA) subunit B//TEA/ATTS domain	GO:0006355	regulation of transcription, DNA-templated	GO:0003700	DNA-binding transcription factor activity	GO:0005667	transcription regulator complex	--	--	DOWN	-1.3333	5.0311e-68	blast,frame:-3 start:2137 end:1343
Cluster-6558.10511-1F	C2C2-GATA	C2C2->C2C2-GATA	Cluster-6558.10511	1219077470	XP_021764807.1	1151	7.1e-123	GATA transcription factor 8-like [Chenopodium quinoa]	XM_010685570.2	XM_010685570	369	0	PREDICTED: Beta vulgaris subsp. vulgaris GATA transcription factor 8 (LOC104898486), mRNA	--	--	--	--	Q9SV30	515	1.5e-50	GATA transcription factor 8 OS=Arabidopsis thaliana OX=3702 GN=GATA8 PE=2 SV=1	PF00320	GATA zinc finger	GO:0006355	regulation of transcription, DNA-templated	GO:0008270//GO:0043565	zinc ion binding//sequence-specific DNA binding	--	--	--	--	UP	1.2429	1.1996e-129	blast,frame:2 start:1481 end:2497
Cluster-6558.20720-0F	Jumonji	Jumonji	Cluster-6558.20720	1226785536	XP_021842002.1	637	3.3e-63	lysine-specific demethylase JMJ25-like [Spinacia oleracea]	XM_021986310.1	XM_021986310	198	4.03224e-97	PREDICTED: Spinacia oleracea lysine-specific demethylase JMJ25-like (LOC110782183), transcript variant X2, mRNA	K15601	KDM3	lysine-specific demethylase 3	http://www.genome.jp/dbget-bin/www_bget?ko:K15601	Q9SSE9	407	5.8e-38	Lysine-specific demethylase JMJ25 OS=Arabidopsis thaliana OX=3702 GN=JMJ25 PE=1 SV=1	PF02325	YGGT family	--	--	--	--	GO:0016020	membrane	KOG1356	Putative transcription factor 5qNCA, contains JmjC domain	DOWN	-1.1517	9.155e-48	blast,frame:2 start:2 end:607|blast,frame:1 start:2923 end:3315
Cluster-6558.15027-0F	TRAF	TRAF	Cluster-6558.15027	1219057431	XP_021754456.1	1274	2.9e-137	BTB/POZ domain-containing protein At2g30600-like [Chenopodium quinoa]	XM_021898764.1	XM_021898764	446	0	PREDICTED: Chenopodium quinoa BTB/POZ domain-containing protein At2g30600-like (LOC110719785), transcript variant X2, mRNA	--	--	--	--	Q8LEV3	916	3.6e-97	BTB/POZ domain-containing protein At2g30600 OS=Arabidopsis thaliana OX=3702 GN=At2g30600/At2g30610 PE=2 SV=1	PF00651//PF09000	BTB/POZ domain//Cytotoxic	GO:0009405	pathogenesis	GO:0005515//GO:0043022//GO:0003723//GO:0016788	protein binding//ribosome binding//RNA binding//hydrolase activity, acting on ester bonds	--	--	KOG4276	Predicted hormone receptor interactor	UP	1.2212	6.5019e-95	blast,frame:1 start:55 end:435
Cluster-6558.24335-0F	Others	Others	Cluster-6558.24335	1219124701	XP_021725677.1	877	2e-91	two-component response regulator-like APRR5 isoform X2 [Chenopodium quinoa]	XM_021869985.1	XM_021869985	350	0	PREDICTED: Chenopodium quinoa two-component response regulator-like APRR5 (LOC110692910), transcript variant X2, mRNA	K12130	PRR5	pseudo-response regulator 5	http://www.genome.jp/dbget-bin/www_bget?ko:K12130	Q6LA42	538	1.5e-53	Two-component response regulator-like APRR5 OS=Arabidopsis thaliana OX=3702 GN=APRR5 PE=1 SV=2	PF00072	Response regulator receiver domain	GO:0000160	phosphorelay signal transduction system	--	--	--	--	--	--	UP	1.106	3.73e-78	blast,frame:1 start:1 end:645
Cluster-6558.32363-1F	C2H2	C2H2	Cluster-6558.32363	1219105952	XP_021716213.1	575	2.1e-56	zinc finger protein ZAT12-like [Chenopodium quinoa]	XM_010687526.2	XM_010687526	98	6.23729e-42	PREDICTED: Beta vulgaris subsp. vulgaris zinc finger protein ZAT12 (LOC104900166), mRNA	--	--	--	--	Q42410	262	1.5e-21	Zinc finger protein ZAT12 OS=Arabidopsis thaliana OX=3702 GN=ZAT12 PE=2 SV=1	PF02150//PF01363//PF00096	RNA polymerases M/15 Kd subunit//FYVE zinc finger//Zinc finger, C2H2 type	GO:0006351	transcription, DNA-templated	GO:0003676//GO:0046872	nucleic acid binding//metal ion binding	--	--	--	--	UP	1.3335	5.6775e-110	blast,frame:2 start:41 end:949
Cluster-6558.19567-1R	C2H2	C2H2	Cluster-6558.19567	870866569	KMT17528.1	533	1.1e-51	hypothetical protein BVRB_2g037310 [Beta vulgaris subsp. vulgaris]	XM_010671536.2	XM_010671536	175	7.28686e-85	PREDICTED: Beta vulgaris subsp. vulgaris zinc finger protein ZAT12 (LOC104886969), mRNA	--	--	--	--	Q9SLD4	278	1.6e-23	Zinc finger protein ZAT11 OS=Arabidopsis thaliana OX=3702 GN=ZAT11 PE=2 SV=1	PF02150//PF00096	RNA polymerases M/15 Kd subunit//Zinc finger, C2H2 type	GO:0006351	transcription, DNA-templated	GO:0003676	nucleic acid binding	--	--	--	--	UP	2.7846	0	blast,frame:-2 start:943 end:236
Cluster-6558.29948-2R	NAC	NAC	Cluster-6558.29948	1052230966	AOC59206.1	972	2e-102	NAC transcription factor 20 [Haloxylon ammodendron]	KU845314.1	KU845314	415	0	Haloxylon ammodendron NAC transcription factor 20 mRNA, complete cds	--	--	--	--	K4BNG7	528	2.4e-52	NAC domain-containing protein 2 OS=Solanum lycopersicum OX=4081 GN=NAP2 PE=2 SV=1	PF02365	No apical meristem (NAM) protein	GO:0006355	regulation of transcription, DNA-templated	GO:0003677	DNA binding	--	--	--	--	DOWN	-1.0242	2.9283e-24	blast,frame:-3 start:1019 end:267
Cluster-6558.26544-2F	RWP-RK	RWP-RK	Cluster-6558.26544	1108811183	XP_010695601.2	406	7e-37	PREDICTED: LRR receptor-like serine/threonine-protein kinase GSO1 isoform X2 [Beta vulgaris subsp. vulgaris]	--	--	--	--	--	--	--	--	--	--	--	--	--	PF13855//PF10541//PF04545	Leucine rich repeat//Nuclear envelope localisation domain//Sigma-70, region 4	GO:0006355//GO:0006352	regulation of transcription, DNA-templated//DNA-templated transcription, initiation	GO:0003700//GO:0005515	DNA-binding transcription factor activity//protein binding	GO:0005667//GO:0016021	transcription regulator complex//integral component of membrane	--	--	DOWN	-5.067	6.543e-106	blast,frame:3 start:3 end:1151
Cluster-6558.22638-1R	TRAF	TRAF	Cluster-6558.22638	1219057431	XP_021754456.1	1640	1e-179	BTB/POZ domain-containing protein At2g30600-like [Chenopodium quinoa]	XM_010694248.2	XM_010694248	663	0	PREDICTED: Beta vulgaris subsp. vulgaris BTB/POZ domain-containing protein At2g30600 (LOC104905652), transcript variant X3, mRNA	--	--	--	--	Q8LEV3	1166	3.5e-126	BTB/POZ domain-containing protein At2g30600 OS=Arabidopsis thaliana OX=3702 GN=At2g30600/At2g30610 PE=2 SV=1	PF00651	BTB/POZ domain	--	--	GO:0005515	protein binding	--	--	--	--	UP	1.2339	2.9998e-78	blast,frame:-2 start:1127 end:3
Cluster-6558.12170-0F	C3H	C3H	Cluster-6558.12170	902233474	KNA23069.1	1151	5.1e-123	hypothetical protein SOVF_028140 [Spinacia oleracea]	XM_021993927.1	XM_021993927	256	1.41838e-129	PREDICTED: Spinacia oleracea zinc finger CCCH domain-containing protein 49-like (LOC110789276), mRNA	--	--	--	--	Q9M0G2	744	3e-77	Zinc finger CCCH domain-containing protein 49 OS=Arabidopsis thaliana OX=3702 GN=At4g29190 PE=2 SV=1	PF00642//PF11770	Zinc finger C-x8-C-x5-C-x3-H type (and similar)//GRB2-binding adapter (GAPT)	--	--	GO:0046872	metal ion binding	GO:0016021	integral component of membrane	--	--	UP	1.2089	1.2858e-70	blast,frame:1 start:184 end:1287
Cluster-6558.25957-1F	MYB	MYB->MYB	Cluster-6558.25957	597960730	AHN50422.1	892	4.1e-93	R2R3-type MYB transcription factor [Salicornia brachiata]	CP025646.1	CP025646	121	1.17135e-54	Ipomoea trifida cultivar NCNSP0306 chromosome 3	K09422	MYBP	myb proto-oncogene protein, plant	http://www.genome.jp/dbget-bin/www_bget?ko:K09422	Q9FDW1	605	3e-61	Transcription factor MYB44 OS=Arabidopsis thaliana OX=3702 GN=MYB44 PE=1 SV=1	PF09111//PF00577	SLIDE//Outer membrane usher protein	GO:0006810//GO:0009297//GO:0006338	transport//pilus assembly//chromatin remodeling	GO:0003676//GO:0015473//GO:0005524//GO:0016818	nucleic acid binding//fimbrial usher porin activity//ATP binding//hydrolase activity, acting on acid anhydrides, in phosphorus-containing anhydrides	GO:0016020//GO:0005634	membrane//nucleus	--	--	UP	1.0644	3.9312e-51	blast,frame:2 start:176 end:1057
Cluster-6558.32361-1R	HB-other	HB->HB-other	Cluster-6558.32361	731331009	XP_010676435.1	1121	2.6e-119	PREDICTED: homeobox protein BEL1 homolog [Beta vulgaris subsp. vulgaris]	XM_010678133.2	XM_010678133	519	0	PREDICTED: Beta vulgaris subsp. vulgaris homeobox protein BEL1 homolog (LOC104892258), mRNA	--	--	--	--	Q38897	587	8.1e-59	Homeobox protein BEL1 homolog OS=Arabidopsis thaliana OX=3702 GN=BEL1 PE=1 SV=2	--	--	--	--	--	--	--	--	--	--	UP	1.0874	6.0991e-50	blast,frame:-2 start:1476 end:634|blast,frame:-1 start:3355 end:1907
Cluster-6558.16576-1R	RWP-RK	RWP-RK	Cluster-6558.16576	1219165258	XP_021746260.1	202	3e-13	uncharacterized protein LOC110712140 isoform X2 [Chenopodium quinoa]	--	--	--	--	--	--	--	--	--	Q5NB82	137	3.9e-07	Protein NLP3 OS=Oryza sativa subsp. japonica OX=39947 GN=NLP3 PE=3 SV=1	PF00558//PF14560//PF04545//PF00564//PF00269	Vpu protein//Ubiquitin-like domain//Sigma-70, region 4//PB1 domain//Small, acid-soluble spore proteins, alpha/beta type	GO:0006352//GO:0006265//GO:0006812//GO:0006355//GO:0032801//GO:0019076	DNA-templated transcription, initiation//DNA topological change//cation transport//regulation of transcription, DNA-templated//receptor catabolic process//viral release from host cell	GO:0003700//GO:0005261//GO:0003690//GO:0005515	DNA-binding transcription factor activity//cation channel activity//double-stranded DNA binding//protein binding	GO:0005667//GO:0033644	transcription regulator complex//host cell membrane	--	--	DOWN	-5.3244	3.2532e-90	blast,frame:-2 start:1077 end:541
Cluster-6558.21024-0F	AP2/ERF-ERF	AP2/ERF->AP2/ERF-ERF	Cluster-6558.21024	1219079388	XP_021765822.1	369	1.2e-32	ethylene-responsive transcription factor ERF104-like [Chenopodium quinoa]	CP027620.1	CP027620	47	1.01825e-13	Linum usitatissimum chromosome Lu10	K09286	EREBP	EREBP-like factor	http://www.genome.jp/dbget-bin/www_bget?ko:K09286	Q9FKG1	214	4.2e-16	Ethylene-responsive transcription factor ERF104 OS=Arabidopsis thaliana OX=3702 GN=ERF104 PE=1 SV=1	PF00847	AP2 domain	GO:0006355	regulation of transcription, DNA-templated	GO:0003700	DNA-binding transcription factor activity	GO:0005667	transcription regulator complex	--	--	UP	2.4869	0	blast,frame:1 start:1 end:477
Cluster-6558.2603-0F	HB-HD-ZIP	HB->HB-HD-ZIP	Cluster-6558.2603	902228268	KNA21035.1	425	5.4e-39	hypothetical protein SOVF_046880 [Spinacia oleracea]	XM_010678605.2	XM_010678605	168	8.06851e-81	PREDICTED: Beta vulgaris subsp. vulgaris homeobox-leucine zipper protein ATHB-12-like (LOC104892624), mRNA	--	--	--	--	Q9M276	312	2.6e-27	Homeobox-leucine zipper protein ATHB-12 OS=Arabidopsis thaliana OX=3702 GN=ATHB-12 PE=1 SV=1	PF00046//PF05920//PF10473//PF06056//PF02183	Homeodomain//Homeobox KN domain//Leucine-rich repeats of kinetochore protein Cenp-F/LEK1//Putative ATPase subunit of terminase (gpP-like)//Homeobox associated leucine zipper	GO:0019069//GO:0006355	viral capsid assembly//regulation of transcription, DNA-templated	GO:0042803//GO:0005524//GO:0043565//GO:0003677//GO:0070840//GO:0008134	protein homodimerization activity//ATP binding//sequence-specific DNA binding//DNA binding//dynein complex binding//transcription factor binding	GO:0005667	transcription regulator complex	--	--	UP	1.2531	6.0683e-63	blast,frame:2 start:587 end:958|blast,frame:1 start:142 end:534
Cluster-6558.19228-0R	MBF1	MBF1	Cluster-6558.19228	1219156149	XP_021741569.1	612	5.7e-61	multiprotein-bridging factor 1c-like [Chenopodium quinoa]	XM_021908770.1	XM_021908770	215	3.02554e-107	PREDICTED: Chenopodium quinoa multiprotein-bridging factor 1c-like (LOC110729071), mRNA	K03627	MBF1	putative transcription factor	http://www.genome.jp/dbget-bin/www_bget?ko:K03627	Q9LV58	472	3.7e-46	Multiprotein-bridging factor 1c OS=Arabidopsis thaliana OX=3702 GN=MBF1C PE=1 SV=1	PF10163	Transcription factor e(y)2	GO:0045893//GO:0006406	positive regulation of transcription, DNA-templated//mRNA export from nucleus	GO:0003713	transcription coactivator activity	GO:0000124//GO:0005643//GO:0005667	SAGA complex//nuclear pore//transcription regulator complex	KOG3398	Transcription factor MBF1	DOWN	-1.5363	5.6877e-32	blast,frame:-1 start:655 end:206
Cluster-6558.20224-0R	C2H2	C2H2	Cluster-6558.20224	1219107708	XP_021717102.1	682	7.8e-69	zinc finger protein 3-like [Chenopodium quinoa]	XM_021920616.1	XM_021920616	169	2.04679e-81	PREDICTED: Chenopodium quinoa zinc finger protein 4-like (LOC110740119), mRNA	--	--	--	--	Q42485	275	4.6e-23	Zinc finger protein 1 OS=Arabidopsis thaliana OX=3702 GN=ZFP1 PE=2 SV=1	PF00096	Zinc finger, C2H2 type	--	--	GO:0003676	nucleic acid binding	--	--	--	--	DOWN	-1.7632	9.4601e-46	blast,frame:-1 start:1029 end:124|blast,frame:-2 start:314 end:117
Cluster-6558.31110-0R	C2C2-Dof	C2C2->C2C2-Dof	Cluster-6558.31110	1219071299	XP_021761615.1	1688	2.7e-185	cyclic dof factor 3-like isoform X1 [Chenopodium quinoa]	XM_021878164.1	XM_021878164	812	0	PREDICTED: Chenopodium quinoa cyclic dof factor 3-like (LOC110700605), mRNA	--	--	--	--	Q8LFV3	792	8.1e-83	Cyclic dof factor 3 OS=Arabidopsis thaliana OX=3702 GN=CDF3 PE=1 SV=2	PF00845//PF02701//PF02724	Geminivirus BL1 movement protein//Dof domain, zinc finger//CDC45-like protein	GO:0006270//GO:0046740//GO:0006355	DNA replication initiation//transport of virus in host, cell to cell//regulation of transcription, DNA-templated	GO:0003677	DNA binding	GO:0033644	host cell membrane	--	--	UP	1.2309	4.4237e-55	blast,frame:-1 start:1798 end:392
Cluster-6558.29765-2F	SET	SET	Cluster-6558.29765	661878585	CDP17669.1	416	1.2e-37	unnamed protein product [Coffea canephora]	XM_010674243.1	XM_010674243	156	7.58586e-74	PREDICTED: Beta vulgaris subsp. vulgaris histone-lysine N-methyltransferase ASHH3 (LOC104889099), transcript variant X3, mRNA	K11423	SETD2, SET2	histone-lysine N-methyltransferase SETD2	http://www.genome.jp/dbget-bin/www_bget?ko:K11423	Q945S8	370	9.7e-34	Histone-lysine N-methyltransferase ASHH3 OS=Arabidopsis thaliana OX=3702 GN=ASHH3 PE=2 SV=2	PF00856//PF02602	SET domain//Uroporphyrinogen-III synthase HemD	GO:0015994//GO:0006783//GO:0033014	chlorophyll metabolic process//heme biosynthetic process//tetrapyrrole biosynthetic process	GO:0004852//GO:0005515	uroporphyrinogen-III synthase activity//protein binding	--	--	--	--	UP	1.104	2.7976e-38	blast,frame:2 start:914 end:1051|blast,frame:3 start:603 end:962|blast,frame:1 start:1186 end:1293
Cluster-6558.19140-1R	Others	Others	Cluster-6558.19140	731315326	XP_010690870.1	1118	5.1e-119	PREDICTED: protein CHLOROPLAST IMPORT APPARATUS 2 isoform X1 [Beta vulgaris subsp. vulgaris]	XM_021901604.1	XM_021901604	669	0	PREDICTED: Chenopodium quinoa protein CHLOROPLAST IMPORT APPARATUS 2-like (LOC110722328), transcript variant X3, mRNA	--	--	--	--	Q9LU68	306	2.8e-26	Protein CHLOROPLAST IMPORT APPARATUS 2 OS=Arabidopsis thaliana OX=3702 GN=CIA2 PE=1 SV=1	PF06203	CCT motif	--	--	GO:0005515	protein binding	--	--	--	--	UP	1.2661	4.6214e-56	blast,frame:-2 start:2273 end:918
Cluster-6558.16768-0R	Others	Others	Cluster-6558.16768	1226780839	XP_021858309.1	356	2.4e-31	two-component response regulator-like APRR5 isoform X3 [Spinacia oleracea]	XM_022002617.1	XM_022002617	148	4.64689e-70	PREDICTED: Spinacia oleracea two-component response regulator-like APRR5 (LOC110797494), transcript variant X3, mRNA	K12130	PRR5	pseudo-response regulator 5	http://www.genome.jp/dbget-bin/www_bget?ko:K12130	Q6LA42	289	5.4e-25	Two-component response regulator-like APRR5 OS=Arabidopsis thaliana OX=3702 GN=APRR5 PE=1 SV=2	PF00072//PF11744	Response regulator receiver domain//Aluminium activated malate transporter	GO:0000160//GO:0015743	phosphorelay signal transduction system//malate transport	--	--	--	--	--	--	UP	1.1184	5.3015e-38	blast,frame:-1 start:347 end:3
Cluster-6558.16299-0R	C2H2	C2H2	Cluster-6558.16299	731338845	XP_010680535.1	895	1.6e-93	PREDICTED: protein SENSITIVE TO PROTON RHIZOTOXICITY 1 [Beta vulgaris subsp. vulgaris]	XM_022005376.1	XM_022005376	78	8.3151e-31	PREDICTED: Spinacia oleracea protein SENSITIVE TO PROTON RHIZOTOXICITY 2-like (LOC110800087), mRNA	--	--	--	--	Q943I6	491	4.4e-48	Zinc finger protein STOP1 homolog OS=Oryza sativa subsp. japonica OX=39947 GN=Os01g0871200 PE=2 SV=1	PF00096	Zinc finger, C2H2 type	--	--	GO:0003676	nucleic acid binding	--	--	--	--	DOWN	-1.0663	7.4884e-15	blast,frame:-1 start:1329 end:262
Cluster-6558.27663-1R	C2H2	C2H2	Cluster-6558.27663	1219076546	XP_021764349.1	1691	1.3e-185	protein indeterminate-domain 12-like [Chenopodium quinoa]	XM_021914599.1	XM_021914599	709	0	PREDICTED: Chenopodium quinoa protein indeterminate-domain 12-like (LOC110734444), mRNA	--	--	--	--	Q8H1F5	873	3.5e-92	Protein indeterminate-domain 7 OS=Arabidopsis thaliana OX=3702 GN=IDD7 PE=2 SV=1	PF08515//PF05399//PF00096	Transforming growth factor beta type I GS-motif//Ectropic viral integration site 2A protein (EVI2A)//Zinc finger, C2H2 type	GO:0006468//GO:0007178//GO:0009069//GO:0016310	protein phosphorylation//transmembrane receptor protein serine/threonine kinase signaling pathway//serine family amino acid metabolic process//phosphorylation	GO:0004675//GO:0005524//GO:0003676	transmembrane receptor protein serine/threonine kinase activity//ATP binding//nucleic acid binding	GO:0016021//GO:0016020	integral component of membrane//membrane	--	--	UP	1.0452	7.7505e-33	blast,frame:-2 start:1870 end:305
Cluster-6558.25104-2F	MYB-related	MYB->MYB-related	Cluster-6558.25104	1219151194	XP_021739087.1	428	3.1e-39	transcription factor MYB36-like [Chenopodium quinoa]	XM_021883395.1	XM_021883395	321	9.15587e-166	PREDICTED: Chenopodium quinoa transcription factor MYB36-like (LOC110705509), mRNA	K09422	MYBP	myb proto-oncogene protein, plant	http://www.genome.jp/dbget-bin/www_bget?ko:K09422	Q9FKL2	340	1.9e-30	Transcription factor MYB36 OS=Arabidopsis thaliana OX=3702 GN=MYB36 PE=1 SV=1	--	--	--	--	--	--	--	--	--	--	DOWN	-1.9015	1.6671e-40	blast,frame:3 start:672 end:1565
Cluster-6558.7273-2F	RWP-RK	RWP-RK	Cluster-6558.7273	1219063608	XP_021757709.1	2781	0	protein NLP6-like [Chenopodium quinoa]	XM_021912175.1	XM_021912175	1393	0	PREDICTED: Chenopodium quinoa protein NLP6-like (LOC110732260), mRNA	--	--	--	--	Q84TH9	1455	2e-159	Protein NLP7 OS=Arabidopsis thaliana OX=3702 GN=NLP7 PE=1 SV=2	PF00564//PF18024	PB1 domain//Helix-turn-helix domain	--	--	GO:0003677//GO:0005515	DNA binding//protein binding	--	--	--	--	UP	1.185	2.5896e-37	blast,frame:2 start:308 end:1426|blast,frame:3 start:1422 end:3449
Cluster-6558.10407-0F	TCP	TCP	Cluster-6558.10407	1219134820	XP_021730756.1	435	3.1e-40	transcription factor TCP6-like [Chenopodium quinoa]	XM_026551291.1	XM_026551291	56	1.21009e-18	PREDICTED: Papaver somniferum transcription factor TCP9-like (LOC113302382), mRNA	--	--	--	--	Q53PH2	296	1.5e-25	Transcription factor PCF3 OS=Oryza sativa subsp. japonica OX=39947 GN=PCF3 PE=2 SV=1	--	--	--	--	--	--	--	--	--	--	UP	1.7647	1.9242e-118	blast,frame:1 start:1 end:579
Cluster-6558.1655-0R	AP2/ERF-ERF	AP2/ERF->AP2/ERF-ERF	Cluster-6558.1655	1219119420	XP_021722987.1	602	2.1e-59	ethylene-responsive transcription factor ERF113-like isoform X2 [Chenopodium quinoa]	XM_010684334.2	XM_010684334	156	5.08461e-74	PREDICTED: Beta vulgaris subsp. vulgaris ethylene-responsive transcription factor ERF113 (LOC104897454), transcript variant X2, mRNA	--	--	--	--	Q9FH54	321	3.1e-28	Ethylene-responsive transcription factor ERF114 OS=Arabidopsis thaliana OX=3702 GN=ERF114 PE=1 SV=1	PF00847	AP2 domain	GO:0006355	regulation of transcription, DNA-templated	GO:0003700	DNA-binding transcription factor activity	GO:0005667	transcription regulator complex	--	--	UP	1.0245	9.0389e-27	blast,frame:-1 start:1484 end:378
Cluster-6558.10220-2R	bHLH	bHLH	Cluster-6558.10220	1219091687	XP_021772031.1	1516	3.2e-165	transcription factor bHLH130-like [Chenopodium quinoa]	XM_021873245.1	XM_021873245	625	0	PREDICTED: Chenopodium quinoa transcription factor bHLH130-like (LOC110695988), mRNA	--	--	--	--	Q66GR3	468	4.1e-45	Transcription factor bHLH130 OS=Arabidopsis thaliana OX=3702 GN=BHLH130 PE=1 SV=1	PF03153//PF00010	Transcription factor IIA, alpha/beta subunit//Helix-loop-helix DNA-binding domain	GO:0006367	transcription initiation from RNA polymerase II promoter	GO:0046983	protein dimerization activity	GO:0005672	transcription factor TFIIA complex	--	--	UP	1.0476	4.547e-30	blast,frame:-3 start:2227 end:815
Cluster-6558.13745-0F	C2C2-Dof	C2C2->C2C2-Dof	Cluster-6558.13745	1219164954	XP_021746110.1	852	4.3e-88	dof zinc finger protein DOF2.1-like [Chenopodium quinoa]	XM_022875378.1	XM_022875378	118	1.32691e-52	PREDICTED: Durio zibethinus dof zinc finger protein DOF2.1-like (LOC111285777), mRNA	--	--	--	--	Q84TE9	354	9.1e-32	Dof zinc finger protein DOF5.3 OS=Arabidopsis thaliana OX=3702 GN=DOF5.3 PE=2 SV=1	PF02701//PF14369	Dof domain, zinc finger//zinc-ribbon	GO:0006355	regulation of transcription, DNA-templated	GO:0061630//GO:0003677	ubiquitin protein ligase activity//DNA binding	--	--	--	--	UP	2.2641	2.9009e-195	blast,frame:1 start:2413 end:3270
Cluster-6558.30132-2F	AP2/ERF-ERF	AP2/ERF->AP2/ERF-ERF	Cluster-6558.30132	1219101482	XP_021713958.1	543	2.6e-52	ethylene-responsive transcription factor ERF113-like [Chenopodium quinoa]	XM_021872437.1	XM_021872437	180	4.11588e-87	PREDICTED: Chenopodium quinoa ethylene-responsive transcription factor ERF110-like (LOC110695211), mRNA	--	--	--	--	Q9FGF8	261	5e-21	Ethylene-responsive transcription factor ABR1 OS=Arabidopsis thaliana OX=3702 GN=ABR1 PE=2 SV=1	PF00847	AP2 domain	GO:0006355	regulation of transcription, DNA-templated	GO:0003700	DNA-binding transcription factor activity	GO:0005667	transcription regulator complex	--	--	DOWN	-1.8195	3.4286e-29	blast,frame:3 start:2202 end:2951
Cluster-6558.6577-2R	MYB-related	MYB->MYB-related	Cluster-6558.6577	731344322	XP_010683349.1	580	1e-56	PREDICTED: transcription factor MYB1R1 [Beta vulgaris subsp. vulgaris]	XM_010685047.1	XM_010685047	190	8.79239e-93	PREDICTED: Beta vulgaris subsp. vulgaris transcription factor MYB1R1 (LOC104898042), mRNA	--	--	--	--	Q2V9B0	380	6.2e-35	Transcription factor MYB1R1 OS=Solanum tuberosum OX=4113 PE=2 SV=1	PF09905//PF00695//PF05297//PF00487//PF00098	DNA-binding protein VF530//Major surface antigen from hepadnavirus//Herpesvirus latent membrane protein 1 (LMP1)//Fatty acid desaturase//Zinc knuckle	GO:0019087//GO:0006629//GO:0016032	transformation of host cell by virus//lipid metabolic process//viral process	GO:0008270//GO:0003676//GO:0003677	zinc ion binding//nucleic acid binding//DNA binding	GO:0016021	integral component of membrane	--	--	UP	1.16	1.722e-36	blast,frame:-1 start:831 end:430|blast,frame:-3 start:2428 end:1718
Cluster-6558.8651-1R	GARP-G2-like	GARP->GARP-G2-like	Cluster-6558.8651	1226798019	XP_021848304.1	928	4.3e-97	transcription activator GLK1-like [Spinacia oleracea]	XM_021887452.1	XM_021887452	409	0	PREDICTED: Chenopodium quinoa transcription activator GLK1-like (LOC110709239), mRNA	--	--	--	--	Q5Z5I4	653	1.3e-66	Probable transcription factor GLK1 OS=Oryza sativa subsp. japonica OX=39947 GN=GLK1 PE=2 SV=1	PF14813//PF09726//PF07655//PF01586//PF01108	NADH dehydrogenase 1 beta subcomplex subunit 2//Macoilin family//Secretin N-terminal domain//Myogenic Basic domain//Tissue factor	GO:0007517//GO:0009297//GO:0006355//GO:0023041	muscle organ development//pilus assembly//regulation of transcription, DNA-templated//neuronal signal transduction	GO:0005515//GO:0003677	protein binding//DNA binding	GO:0005743//GO:0005747//GO:0030867//GO:0005634//GO:0019867	mitochondrial inner membrane//mitochondrial respiratory chain complex I//rough endoplasmic reticulum membrane//nucleus//outer membrane	--	--	UP	1.3867	2.4651e-57	blast,frame:-2 start:2032 end:713
Cluster-6558.9213-2R	MYB-related	MYB->MYB-related	Cluster-6558.9213	731368834	XP_010696364.1	851	4e-88	PREDICTED: protein REVEILLE 8 isoform X1 [Beta vulgaris subsp. vulgaris]	XM_010698064.2	XM_010698064	381	0	PREDICTED: Beta vulgaris subsp. vulgaris protein REVEILLE 8 (LOC104908893), transcript variant X4, mRNA	--	--	--	--	Q8RWU3	595	7.3e-60	Protein REVEILLE 8 OS=Arabidopsis thaliana OX=3702 GN=RVE8 PE=2 SV=1	--	--	--	--	--	--	--	--	--	--	UP	1.1257	6.7522e-29	blast,frame:-2 start:1096 end:770|blast,frame:-3 start:2463 end:1630
Cluster-6558.9137-0R	C2C2-LSD	C2C2->C2C2-LSD	Cluster-6558.9137	1012323916	KYP35984.1	216	2e-14	hypothetical protein KK1_042921 [Cajanus cajan]	XM_010678958.2	XM_010678958	102	8.46015e-44	PREDICTED: Beta vulgaris subsp. vulgaris protein LOL1 (LOC104892935), mRNA	--	--	--	--	Q93ZB1	207	8.2e-15	Protein LOL1 OS=Arabidopsis thaliana OX=3702 GN=LOL1 PE=2 SV=1	PF07491//PF02150	Protein phosphatase inhibitor//RNA polymerases M/15 Kd subunit	GO:0006351//GO:0032515	transcription, DNA-templated//negative regulation of phosphoprotein phosphatase activity	GO:0004865	protein serine/threonine phosphatase inhibitor activity	--	--	--	--	UP	1.3834	2.0669e-49	blast,frame:-1 start:1656 end:1450|blast,frame:-3 start:1882 end:1748|blast,frame:-2 start:2654 end:2445
Cluster-6558.9137-1R	C2C2-LSD	C2C2->C2C2-LSD	Cluster-6558.9137	1012323916	KYP35984.1	216	2e-14	hypothetical protein KK1_042921 [Cajanus cajan]	XM_010678958.2	XM_010678958	102	8.46015e-44	PREDICTED: Beta vulgaris subsp. vulgaris protein LOL1 (LOC104892935), mRNA	--	--	--	--	Q93ZB1	207	8.2e-15	Protein LOL1 OS=Arabidopsis thaliana OX=3702 GN=LOL1 PE=2 SV=1	PF07491//PF02150	Protein phosphatase inhibitor//RNA polymerases M/15 Kd subunit	GO:0006351//GO:0032515	transcription, DNA-templated//negative regulation of phosphoprotein phosphatase activity	GO:0004865	protein serine/threonine phosphatase inhibitor activity	--	--	--	--	UP	1.3834	2.0669e-49	blast,frame:-1 start:1656 end:1450|blast,frame:-3 start:1882 end:1748|blast,frame:-2 start:2654 end:2445
Cluster-6558.9137-2R	C2C2-LSD	C2C2->C2C2-LSD	Cluster-6558.9137	1012323916	KYP35984.1	216	2e-14	hypothetical protein KK1_042921 [Cajanus cajan]	XM_010678958.2	XM_010678958	102	8.46015e-44	PREDICTED: Beta vulgaris subsp. vulgaris protein LOL1 (LOC104892935), mRNA	--	--	--	--	Q93ZB1	207	8.2e-15	Protein LOL1 OS=Arabidopsis thaliana OX=3702 GN=LOL1 PE=2 SV=1	PF07491//PF02150	Protein phosphatase inhibitor//RNA polymerases M/15 Kd subunit	GO:0006351//GO:0032515	transcription, DNA-templated//negative regulation of phosphoprotein phosphatase activity	GO:0004865	protein serine/threonine phosphatase inhibitor activity	--	--	--	--	UP	1.3834	2.0669e-49	blast,frame:-1 start:1656 end:1450|blast,frame:-3 start:1882 end:1748|blast,frame:-2 start:2654 end:2445
Cluster-6558.20890-2R	GRAS	GRAS	Cluster-6558.20890	1219102545	XP_021714509.1	2020	9.9e-224	LOW QUALITY PROTEIN: scarecrow-like protein 4 [Chenopodium quinoa]	XM_021862307.1	XM_021862307	539	0	PREDICTED: Chenopodium quinoa scarecrow-like protein 4 (LOC110685787), mRNA	--	--	--	--	A0A024B7I0	1471	1.7e-161	SCARECROW-LIKE protein 7 OS=Populus euphratica OX=75702 GN=SCL7 PE=2 SV=1	--	--	--	--	--	--	--	--	--	--	UP	1.2411	1.2228e-34	blast,frame:-3 start:2204 end:270
Cluster-6558.9768-2R	C2H2	C2H2	Cluster-6558.9768	870853214	KMT05095.1	1325	3.4e-143	hypothetical protein BVRB_7g172490 [Beta vulgaris subsp. vulgaris]	XM_021859804.1	XM_021859804	447	0	PREDICTED: Chenopodium quinoa uncharacterized LOC110683431 (LOC110683431), mRNA	--	--	--	--	--	--	--	--	PF00096	Zinc finger, C2H2 type	--	--	GO:0003676	nucleic acid binding	--	--	--	--	UP	1.1013	1.4491e-25	blast,frame:-3 start:1839 end:655
Cluster-6558.27502-2F	bZIP	bZIP	Cluster-6558.27502	1219067762	XP_021759835.1	377	2.4e-33	transcription factor RF2a-like [Chenopodium quinoa]	XM_010672588.2	XM_010672588	187	2.74261e-91	PREDICTED: Beta vulgaris subsp. vulgaris transcription factor VIP1 (LOC104887833), mRNA	--	--	--	--	O22873	268	4e-22	bZIP transcription factor 18 OS=Arabidopsis thaliana OX=3702 GN=BZIP18 PE=1 SV=1	PF04871//PF03131//PF15070//PF06005//PF07716//PF10473//PF00170//PF16331//PF06156	Uso1 / p115 like vesicle tethering protein, C terminal region//bZIP Maf transcription factor//Putative golgin subfamily A member 2-like protein 5//Cell division protein ZapB//Basic region leucine zipper//Leucine-rich repeats of kinetochore protein Cenp-F/LEK1//bZIP transcription factor//TolA binding protein trimerisation//Initiation control protein YabA	GO:0043093//GO:0016192//GO:0006260//GO:0006355//GO:0006886//GO:0070206//GO:0090529	FtsZ-dependent cytokinesis//vesicle-mediated transport//DNA replication//regulation of transcription, DNA-templated//intracellular protein transport//protein trimerization//cell septum assembly	GO:0042803//GO:0003677//GO:0008134//GO:0003700//GO:0070840	protein homodimerization activity//DNA binding//transcription factor binding//DNA-binding transcription factor activity//dynein complex binding	GO:0005634//GO:0005667//GO:0005794//GO:0005737	nucleus//transcription regulator complex//Golgi apparatus//cytoplasm	--	--	DOWN	-1.5766	5.185e-23	blast,frame:3 start:3 end:356
Cluster-6558.11710-2R	C2H2	C2H2	Cluster-6558.11710	1219080519	XP_021766394.1	514	2.7e-49	zinc finger protein ZAT5-like [Chenopodium quinoa]	XM_021992541.1	XM_021992541	101	1.47314e-43	PREDICTED: Spinacia oleracea zinc finger protein ZAT5-like (LOC110787907), mRNA	--	--	--	--	Q681X4	261	2.2e-21	Zinc finger protein ZAT5 OS=Arabidopsis thaliana OX=3702 GN=ZAT5 PE=2 SV=1	PF01350//PF02150//PF00096	Flavivirus non-structural protein NS4A//RNA polymerases M/15 Kd subunit//Zinc finger, C2H2 type	GO:0016032//GO:0016070//GO:0006351	viral process//RNA metabolic process//transcription, DNA-templated	GO:0003676	nucleic acid binding	GO:0019012	virion	--	--	UP	1.1294	5.5726e-24	blast,frame:-3 start:1330 end:125
Cluster-6558.11903-0R	C2C2-Dof	C2C2->C2C2-Dof	Cluster-6558.11903	1219069998	XP_021760968.1	912	3.8e-95	dof zinc finger protein DOF1.2-like [Chenopodium quinoa]	XM_010681812.2	XM_010681812	382	0	PREDICTED: Beta vulgaris subsp. vulgaris dof zinc finger protein DOF3.5 (LOC104895340), mRNA	--	--	--	--	Q9SVC5	299	1.8e-25	Dof zinc finger protein DOF3.5 OS=Arabidopsis thaliana OX=3702 GN=DOF3.5 PE=3 SV=1	PF02701	Dof domain, zinc finger	GO:0006355	regulation of transcription, DNA-templated	GO:0003677	DNA binding	--	--	--	--	UP	1.4853	1.8004e-49	blast,frame:-1 start:2202 end:1345
Cluster-6558.34557-2R	DBB	DBB	Cluster-6558.34557	731358526	XP_010690797.1	695	3.6e-70	PREDICTED: B-box zinc finger protein 20 [Beta vulgaris subsp. vulgaris]	XM_010692495.2	XM_010692495	257	3.71073e-130	PREDICTED: Beta vulgaris subsp. vulgaris B-box zinc finger protein 20 (LOC104904288), mRNA	--	--	--	--	Q0IGM7	502	3.3e-49	B-box zinc finger protein 20 OS=Arabidopsis thaliana OX=3702 GN=BBX20 PE=1 SV=1	PF00130//PF00643//PF01667	Phorbol esters/diacylglycerol binding domain (C1 domain)//B-box zinc finger//Ribosomal protein S27	GO:0042254//GO:0035556//GO:0006412	ribosome biogenesis//intracellular signal transduction//translation	GO:0008270//GO:0003735	zinc ion binding//structural constituent of ribosome	GO:0005840	ribosome	--	--	DOWN	-1.0878	8.0092e-10	blast,frame:-3 start:1706 end:1035
Cluster-6558.15250-0R	MYB-related	MYB->MYB-related	Cluster-6558.15250	870862093	KMT13333.1	1219	7.5e-131	hypothetical protein BVRB_4g084740 [Beta vulgaris subsp. vulgaris]	XM_022000343.1	XM_022000343	411	0	PREDICTED: Spinacia oleracea protein REVEILLE 1 (LOC110795337), transcript variant X2, mRNA	--	--	--	--	F4KGY6	389	5e-36	Protein REVEILLE 1 OS=Arabidopsis thaliana OX=3702 GN=RVE1 PE=2 SV=1	PF01607	Chitin binding Peritrophin-A domain	--	--	GO:0008061	chitin binding	GO:0005576	extracellular region	--	--	UP	2.1475	3.9074e-120	blast,frame:-3 start:1952 end:1800|blast,frame:-2 start:1626 end:1297
Cluster-6558.33129-1R	NAC	NAC	Cluster-6558.33129	1219048061	XP_021720834.1	1525	2e-166	NAC domain-containing protein 35-like [Chenopodium quinoa]	XM_021865142.1	XM_021865142	600	0	PREDICTED: Chenopodium quinoa NAC domain-containing protein 35-like (LOC110688400), mRNA	--	--	--	--	Q9ZVP8	839	2.6e-88	NAC domain-containing protein 35 OS=Arabidopsis thaliana OX=3702 GN=NAC035 PE=1 SV=2	PF02365//PF11857//PF06175	No apical meristem (NAM) protein//Domain of unknown function (DUF3377)//tRNA-(MS[2]IO[6]A)-hydroxylase (MiaE)	GO:0006355//GO:0006400	regulation of transcription, DNA-templated//tRNA modification	GO:0045301//GO:0003677//GO:0004222	tRNA-(2-methylthio-N-6-(cis-hydroxy)isopentenyl adenosine)-hydroxylase activity//DNA binding//metalloendopeptidase activity	--	--	--	--	UP	1.0494	9.7361e-15	blast,frame:-2 start:1852 end:278
Cluster-6558.12874-2F	HB-WOX	HB->HB-WOX	Cluster-6558.12874	731314854	XP_010688717.1	876	3e-91	PREDICTED: WUSCHEL-related homeobox 4 isoform X1 [Beta vulgaris subsp. vulgaris]	XM_021866878.1	XM_021866878	267	8.22655e-136	PREDICTED: Chenopodium quinoa WUSCHEL-related homeobox 4-like (LOC110690049), transcript variant X2, mRNA	--	--	--	--	Q6X7J9	522	1.3e-51	WUSCHEL-related homeobox 4 OS=Arabidopsis thaliana OX=3702 GN=WOX4 PE=1 SV=1	PF00046	Homeodomain	--	--	GO:0003677	DNA binding	--	--	--	--	UP	1.1261	8.1677e-18	blast,frame:3 start:204 end:962
Cluster-6558.13387-0F	HB-other	HB->HB-other	Cluster-6558.13387	1219081398	XP_021766827.1	710	7e-72	homeobox protein knotted-1-like LET6 [Chenopodium quinoa]	XM_021864059.1	XM_021864059	342	2.21464e-177	PREDICTED: Chenopodium quinoa homeobox protein knotted-1-like LET6 (LOC110687410), mRNA	--	--	--	--	O22299	603	6.8e-61	Homeobox protein knotted-1-like LET6 OS=Solanum lycopersicum OX=4081 GN=LET6 PE=2 SV=1	PF05920//PF00046//PF03789//PF02511	Homeobox KN domain//Homeodomain//ELK domain//Thymidylate synthase complementing protein	GO:0006231//GO:0006206//GO:0006355	dTMP biosynthetic process//pyrimidine nucleobase metabolic process//regulation of transcription, DNA-templated	GO:0050660//GO:0050797//GO:0003677	flavin adenine dinucleotide binding//thymidylate synthase (FAD) activity//DNA binding	--	--	--	--	UP	1.1339	1.0022e-17	blast,frame:1 start:1213 end:1830
Cluster-6558.24038-2R	LIM	LIM	Cluster-6558.24038	902213804	KNA17338.1	892	2.9e-93	hypothetical protein SOVF_080450 [Spinacia oleracea]	XM_021872731.1	XM_021872731	372	0	PREDICTED: Chenopodium quinoa LIM domain-containing protein WLIM1-like (LOC110695503), mRNA	K09377	CSRP	cysteine and glycine-rich protein	http://www.genome.jp/dbget-bin/www_bget?ko:K09377	Q94JX5	733	3e-76	LIM domain-containing protein WLIM1 OS=Arabidopsis thaliana OX=3702 GN=WLIM1 PE=1 SV=1	PF04805//PF00243	E10-like protein conserved region//Nerve growth factor family	GO:0055114//GO:0007165	oxidation-reduction process//signal transduction	GO:0016972//GO:0005102	thiol oxidase activity//signaling receptor binding	--	--	--	--	UP	1.2948	1.8518e-22	blast,frame:-3 start:886 end:305
Cluster-6558.41512-0F	BBR-BPC	BBR-BPC	Cluster-6558.41512	731376951	XP_010667727.1	1086	3.1e-115	PREDICTED: protein BASIC PENTACYSTEINE4 [Beta vulgaris subsp. vulgaris]	XM_019247667.1	XM_019247667	213	2.01992e-105	PREDICTED: Beta vulgaris subsp. vulgaris protein BASIC PENTACYSTEINE4 (LOC104884738), transcript variant X2, mRNA	--	--	--	--	Q8S8C6	619	1.7e-62	Protein BASIC PENTACYSTEINE4 OS=Arabidopsis thaliana OX=3702 GN=BPC4 PE=1 SV=1	PF06624	Ribosome associated membrane protein RAMP4	--	--	--	--	GO:0005783	endoplasmic reticulum	--	--	UP	1.187	4.3839e-18	blast,frame:1 start:2497 end:3345
Cluster-6558.8204-0R	B3	B3->B3	Cluster-6558.8204	1219122788	XP_021724704.1	283	1.3e-22	putative B3 domain-containing protein Os03g0621600 [Chenopodium quinoa]	--	--	--	--	--	--	--	--	--	Q851V1	129	3.4e-06	Putative B3 domain-containing protein Os03g0621600 OS=Oryza sativa subsp. japonica OX=39947 GN=Os03g0621600 PE=3 SV=1	--	--	--	--	--	--	--	--	--	--	DOWN	-9.3199	6.8828e-14	blast,frame:-1 start:438 end:199
Cluster-6558.11669-0R	HB-HD-ZIP	HB->HB-HD-ZIP	Cluster-6558.11669	1219146841	XP_021736870.1	2278	1.5e-253	homeobox-leucine zipper protein GLABRA 2-like [Chenopodium quinoa]	XM_021876306.1	XM_021876306	1026	0	PREDICTED: Chenopodium quinoa homeobox-leucine zipper protein GLABRA 2-like (LOC110698785), transcript variant X1, mRNA	K09338	HD-ZIP	homeobox-leucine zipper protein	http://www.genome.jp/dbget-bin/www_bget?ko:K09338	P46607	1656	7.7e-183	Homeobox-leucine zipper protein GLABRA 2 OS=Arabidopsis thaliana OX=3702 GN=GL2 PE=2 SV=3	PF05920//PF00046//PF02183//PF06005//PF01852	Homeobox KN domain//Homeodomain//Homeobox associated leucine zipper//Cell division protein ZapB//START domain	GO:0090529//GO:0006355//GO:0043093	cell septum assembly//regulation of transcription, DNA-templated//FtsZ-dependent cytokinesis	GO:0008289//GO:0043565//GO:0003677	lipid binding//sequence-specific DNA binding//DNA binding	GO:0005737	cytoplasm	--	--	UP	1.0429	4.0936e-14	blast,frame:-3 start:807 end:298|blast,frame:-1 start:2672 end:717
Cluster-6558.11660-2R	LIM	LIM	Cluster-6558.11660	1219168955	XP_021748060.1	1707	2e-187	uncharacterized protein LOC110713920 isoform X1 [Chenopodium quinoa]	XM_021993864.1	XM_021993864	712	0	PREDICTED: Spinacia oleracea uncharacterized LOC110789210 (LOC110789210), transcript variant X2, mRNA	--	--	--	--	Q500W4	655	7.4e-67	LIM domain-containing protein PLIM2c OS=Arabidopsis thaliana OX=3702 GN=PLIM2C PE=1 SV=1	--	--	--	--	--	--	--	--	--	--	UP	1.4193	4.5877e-24	--
Cluster-8971.0-2R	GARP-G2-like	GARP->GARP-G2-like	Cluster-8971.0	1226847921	XP_021837760.1	1750	2.8e-192	putative disease resistance RPP13-like protein 1 [Spinacia oleracea]	--	--	--	--	--	--	--	--	--	Q9LRR4	485	5.1e-47	Putative disease resistance RPP13-like protein 1 OS=Arabidopsis thaliana OX=3702 GN=RPPL1 PE=3 SV=1	PF02362//PF13855	B3 DNA binding domain//Leucine rich repeat	--	--	GO:0003677//GO:0005515	DNA binding//protein binding	--	--	--	--	DOWN	-4.7364	3.2013e-21	blast,frame:-3 start:3119 end:276
Cluster-6558.9971-1F	B3	B3->B3	Cluster-6558.9971	1219071054	XP_021761488.1	955	2.1e-100	B3 domain-containing protein Os12g0592300-like isoform X2 [Chenopodium quinoa]	--	--	--	--	--	--	--	--	--	Q851V5	196	8.2e-14	Putative B3 domain-containing protein Os03g0621600 OS=Oryza sativa subsp. japonica OX=39947 GN=Os03g0621600 PE=3 SV=1	PF04931//PF02362	DNA polymerase phi//B3 DNA binding domain	GO:0006355	regulation of transcription, DNA-templated	GO:0003677//GO:0008134	DNA binding//transcription factor binding	GO:0005667//GO:0005730	transcription regulator complex//nucleolus	--	--	DOWN	-1.1335	8.9771e-07	blast,frame:2 start:125 end:1249
Cluster-6558.23703-0F	GARP-G2-like	GARP->GARP-G2-like	Cluster-6558.23703	1219161906	XP_021744532.1	911	3.5e-95	transcription factor MYBC1-like [Chenopodium quinoa]	XM_021890007.1	XM_021890007	407	0	PREDICTED: Chenopodium quinoa transcription factor MYBC1-like (LOC110711602), mRNA	--	--	--	--	O22210	430	7.9e-41	Transcription factor MYBC1 OS=Arabidopsis thaliana OX=3702 GN=MYBC1 PE=1 SV=1	PF06003//PF01285	Survival motor neuron protein (SMN)//TEA/ATTS domain	GO:0006397//GO:0006355	mRNA processing//regulation of transcription, DNA-templated	GO:0003723//GO:0003700	RNA binding//DNA-binding transcription factor activity	GO:0005634//GO:0005667//GO:0005737	nucleus//transcription regulator complex//cytoplasm	--	--	UP	1.5292	8.5392e-26	blast,frame:1 start:22 end:1119
Cluster-6558.3853-1F	AP2/ERF-ERF	AP2/ERF->AP2/ERF-ERF	Cluster-6558.3853	870858356	KMT09874.1	1224	3e-131	hypothetical protein BVRB_6g128480 [Beta vulgaris subsp. vulgaris]	XM_010681372.2	XM_010681372	433	0	PREDICTED: Beta vulgaris subsp. vulgaris AP2-like ethylene-responsive transcription factor ANT (LOC104894983), mRNA	--	--	--	--	Q38914	643	2.7e-65	AP2-like ethylene-responsive transcription factor ANT OS=Arabidopsis thaliana OX=3702 GN=ANT PE=1 SV=2	PF09726//PF00847	Macoilin family//AP2 domain	GO:0023041//GO:0006355	neuronal signal transduction//regulation of transcription, DNA-templated	GO:0003700	DNA-binding transcription factor activity	GO:0005667//GO:0030867	transcription regulator complex//rough endoplasmic reticulum membrane	--	--	UP	1.5455	2.1029e-26	blast,frame:3 start:2571 end:3251|blast,frame:2 start:431 end:1927
Cluster-6558.11401-0R	MYB	MYB->MYB	Cluster-6558.11401	1219053111	XP_021746312.1	1284	1.4e-138	transcription factor MYB124-like [Chenopodium quinoa]	XM_021867248.1	XM_021867248	613	0	PREDICTED: Chenopodium quinoa transcription factor MYB124-like (LOC110690422), transcript variant X2, mRNA	K09422	MYBP	myb proto-oncogene protein, plant	http://www.genome.jp/dbget-bin/www_bget?ko:K09422	Q94FL6	803	3.1e-84	Transcription factor MYB124 OS=Arabidopsis thaliana OX=3702 GN=MYB124 PE=1 SV=1	PF01215	Cytochrome c oxidase subunit Vb	GO:0006123	mitochondrial electron transport, cytochrome c to oxygen	GO:0004129	cytochrome-c oxidase activity	GO:0005740//GO:0045277	mitochondrial envelope//respiratory chain complex IV	--	--	UP	1.0083	5.3457e-11	blast,frame:-1 start:996 end:1
Cluster-6558.42076-1F	C2C2-GATA	C2C2->C2C2-GATA	Cluster-6558.42076	1219172419	XP_021749841.1	909	4.3e-95	putative GATA transcription factor 22 [Chenopodium quinoa]	XM_010668955.2	XM_010668955	334	4.57416e-173	PREDICTED: Beta vulgaris subsp. vulgaris putative GATA transcription factor 22 (LOC104884319), mRNA	--	--	--	--	Q9SZI6	286	2.9e-24	Putative GATA transcription factor 22 OS=Arabidopsis thaliana OX=3702 GN=GATA22 PE=1 SV=1	PF00320	GATA zinc finger	GO:0006355	regulation of transcription, DNA-templated	GO:0008270//GO:0043565	zinc ion binding//sequence-specific DNA binding	--	--	--	--	UP	1.3309	1.0129e-15	--
Cluster-6558.40575-2F	HMG	HMG	Cluster-6558.40575	731330803	XP_010676327.1	909	5.4e-95	PREDICTED: high mobility group B protein 13 [Beta vulgaris subsp. vulgaris]	XM_021898631.1	XM_021898631	734	0	PREDICTED: Chenopodium quinoa high mobility group B protein 13-like (LOC110719652), transcript variant X2, mRNA	K09273	UBTF	upstream-binding transcription factor	http://www.genome.jp/dbget-bin/www_bget?ko:K09273	Q9SUP7	699	4.6e-72	High mobility group B protein 6 OS=Arabidopsis thaliana OX=3702 GN=HMGB6 PE=2 SV=1	PF01352//PF01061//PF00833	KRAB box//ABC-2 type transporter//Ribosomal S17	GO:0006412//GO:0042254//GO:0006355	translation//ribosome biogenesis//regulation of transcription, DNA-templated	GO:0003676//GO:0003735	nucleic acid binding//structural constituent of ribosome	GO:0016020//GO:0005840	membrane//ribosome	--	--	UP	1.1035	8.9771e-12	blast,frame:3 start:3 end:1583
Cluster-6558.10662-0R	FAR1	FAR1	Cluster-6558.10662	1219146681	XP_021736782.1	1226	1.6e-131	protein FAR1-RELATED SEQUENCE 8-like [Chenopodium quinoa]	--	--	--	--	--	--	--	--	--	Q9SWG3	591	2.6e-59	Protein FAR-RED IMPAIRED RESPONSE 1 OS=Arabidopsis thaliana OX=3702 GN=FAR1 PE=1 SV=1	PF00872//PF04434	Transposase, Mutator family//SWIM zinc finger	GO:0006313	transposition, DNA-mediated	GO:0003677//GO:0008270//GO:0004803	DNA binding//zinc ion binding//transposase activity	--	--	--	--	DOWN	-6.6768	7.8027e-14	blast,frame:-2 start:1441 end:740|blast,frame:-1 start:2699 end:1410
Cluster-6558.37411-1F	FAR1	FAR1	Cluster-6558.37411	731333378	XP_010677702.1	1354	2.5e-146	PREDICTED: protein FAR1-RELATED SEQUENCE 6-like [Beta vulgaris subsp. vulgaris]	XM_021911867.1	XM_021911867	52	6.04768e-16	PREDICTED: Chenopodium quinoa uncharacterized LOC110731950 (LOC110731950), transcript variant X2, mRNA	--	--	--	--	Q9SWG3	656	8.1e-67	Protein FAR-RED IMPAIRED RESPONSE 1 OS=Arabidopsis thaliana OX=3702 GN=FAR1 PE=1 SV=1	PF04434//PF06663	SWIM zinc finger//Protein of unknown function (DUF1170)	GO:0009966	regulation of signal transduction	GO:0008270	zinc ion binding	GO:0016020//GO:0005737	membrane//cytoplasm	--	--	UP	2.7173	2.8253e-96	--
Cluster-6558.40778-2R	AUX/IAA	AUX/IAA	Cluster-6558.40778	1373768202	AVV48470.1	949	8.6e-100	IAA31 [Bassia scoparia]	MF376163.1	MF376163	331	1.82351e-171	Bassia scoparia IAA31 mRNA, complete cds	K14484	IAA	auxin-responsive protein IAA	http://www.genome.jp/dbget-bin/www_bget?ko:K14484	Q93WC4	239	7e-19	Auxin-responsive protein IAA29 OS=Arabidopsis thaliana OX=3702 GN=IAA29 PE=1 SV=2	--	--	--	--	--	--	--	--	--	--	UP	1.01	5.5313e-09	blast,frame:-3 start:1183 end:350
Cluster-8590.0-2F	HMG	HMG	Cluster-8590.0	1226845357	XP_021836532.1	1539	1.1e-167	uncharacterized protein LOC110776296 [Spinacia oleracea]	XM_010689196.2	XM_010689196	1201	0	PREDICTED: Beta vulgaris subsp. vulgaris uncharacterized LOC104901601 (LOC104901601), transcript variant X2, mRNA	K17592	SACS	sacsin	http://www.genome.jp/dbget-bin/www_bget?ko:K17592	P26585	142	4.1e-07	HMG1/2-like protein OS=Glycine max OX=3847 PE=2 SV=1	PF07178	TraL protein	GO:0000746	conjugation	--	--	GO:0019867	outer membrane	--	--	DOWN	-1.5075	1.9234e-09	blast,frame:2 start:1589 end:2794
Cluster-6558.4221-0F	C2H2	C2H2	Cluster-6558.4221	--	--	--	--	--	HG975451.1	HG975451	39	5.88944e-09	Solanum pennellii chromosome ch12, complete genome	--	--	--	--	--	--	--	--	PF08996//PF03604//PF00096//PF02892	DNA Polymerase alpha zinc finger//DNA directed RNA polymerase, 7 kDa subunit//Zinc finger, C2H2 type//BED zinc finger	GO:0006351//GO:0006144//GO:0006260//GO:0006206	transcription, DNA-templated//purine nucleobase metabolic process//DNA replication//pyrimidine nucleobase metabolic process	GO:0003887//GO:0003677//GO:0003676//GO:0003899	DNA-directed DNA polymerase activity//DNA binding//nucleic acid binding//DNA-directed 5'-3' RNA polymerase activity	GO:0005730//GO:0042575	nucleolus//DNA polymerase complex	--	--	UP	1.0286	7.0463e-10	--
Cluster-10079.0-0F	bHLH	bHLH	Cluster-10079.0	870845520	KMS98236.1	1059	2e-112	hypothetical protein BVRB_4g094560 [Beta vulgaris subsp. vulgaris]	XM_021886753.1	XM_021886753	325	5.27041e-168	PREDICTED: Chenopodium quinoa transcription factor bHLH94-like (LOC110708581), mRNA	--	--	--	--	Q9SK91	494	2.5e-48	Transcription factor bHLH94 OS=Arabidopsis thaliana OX=3702 GN=BHLH94 PE=1 SV=2	PF00010//PF08335	Helix-loop-helix DNA-binding domain//GlnD PII-uridylyltransferase	--	--	GO:0046983//GO:0016779	protein dimerization activity//nucleotidyltransferase activity	--	--	--	--	UP	1.0322	5.272e-09	blast,frame:1 start:85 end:1344
Cluster-4273.1-1R	FAR1	FAR1	Cluster-4273.1	731353731	XP_010688210.1	2038	1.1e-225	PREDICTED: protein FAR1-RELATED SEQUENCE 6-like [Beta vulgaris subsp. vulgaris]	--	--	--	--	--	--	--	--	--	Q9SWG3	784	1.1e-81	Protein FAR-RED IMPAIRED RESPONSE 1 OS=Arabidopsis thaliana OX=3702 GN=FAR1 PE=1 SV=1	PF01585//PF04434	G-patch domain//SWIM zinc finger	--	--	GO:0008270//GO:0003676	zinc ion binding//nucleic acid binding	--	--	--	--	DOWN	-6.8714	4.9874e-10	--
Cluster-6558.40279-2F	bHLH	bHLH	Cluster-6558.40279	870853709	KMT05583.1	1657	1.2e-181	hypothetical protein BVRB_7g168260 [Beta vulgaris subsp. vulgaris]	XM_010686809.2	XM_010686809	605	0	PREDICTED: Beta vulgaris subsp. vulgaris transcription factor bHLH78 (LOC104899593), mRNA	--	--	--	--	Q9SRT2	544	5.2e-54	Transcription factor bHLH62 OS=Arabidopsis thaliana OX=3702 GN=BHLH62 PE=2 SV=1	PF00010//PF04086	Helix-loop-helix DNA-binding domain//Signal recognition particle, alpha subunit, N-terminal	GO:0006886	intracellular protein transport	GO:0005047//GO:0003924//GO:0046983//GO:0005525	signal recognition particle binding//GTPase activity//protein dimerization activity//GTP binding	GO:0005785//GO:0005786	signal recognition particle receptor complex//signal recognition particle, endoplasmic reticulum targeting	--	--	UP	1.6934	6.0889e-24	blast,frame:3 start:96 end:1859
Cluster-6558.27581-2R	FAR1	FAR1	Cluster-6558.27581	731377003	XP_010667744.1	1897	3.4e-209	PREDICTED: protein FAR1-RELATED SEQUENCE 6-like [Beta vulgaris subsp. vulgaris]	XM_021987533.1	XM_021987533	90	5.77218e-37	PREDICTED: Spinacia oleracea protein VAC14 homolog (LOC110783224), mRNA	--	--	--	--	Q9SWG3	835	1.8e-87	Protein FAR-RED IMPAIRED RESPONSE 1 OS=Arabidopsis thaliana OX=3702 GN=FAR1 PE=1 SV=1	PF02020//PF04434//PF00872	eIF4-gamma/eIF5/eIF2-epsilon//SWIM zinc finger//Transposase, Mutator family	GO:0006313	transposition, DNA-mediated	GO:0003677//GO:0004803//GO:0005515//GO:0008270	DNA binding//transposase activity//protein binding//zinc ion binding	--	--	--	--	UP	2.0696	9.9054e-43	blast,frame:-3 start:3530 end:303
Cluster-6558.12314-1R	bHLH	bHLH	Cluster-6558.12314	1226823764	XP_021861076.1	323	2.2e-27	transcription factor PRE6-like [Spinacia oleracea]	XM_021865688.1	XM_021865688	258	4.61606e-131	PREDICTED: Chenopodium quinoa transcription factor PRE6-like (LOC110688940), mRNA	--	--	--	--	Q8GW32	264	5.9e-22	Transcription factor PRE6 OS=Arabidopsis thaliana OX=3702 GN=PRE6 PE=1 SV=1	PF04136//PF06009//PF00010//PF15233//PF14523//PF05791	Sec34-like family//Laminin Domain II//Helix-loop-helix DNA-binding domain//Synaptonemal complex central element protein 1//Syntaxin-like protein//Bacillus haemolytic enterotoxin (HBL)	GO:0007130//GO:0009405//GO:0006886//GO:0007155//GO:0070193	synaptonemal complex assembly//pathogenesis//intracellular protein transport//cell adhesion//synaptonemal complex organization	GO:0046983	protein dimerization activity	GO:0005801//GO:0016020//GO:0000795	cis-Golgi network//membrane//synaptonemal complex	--	--	UP	1.5716	2.7184e-19	blast,frame:-2 start:709 end:404
Cluster-6558.2312-2R	bHLH	bHLH	Cluster-6558.2312	1219053551	XP_021748216.1	497	2e-47	transcription factor bHLH137-like [Chenopodium quinoa]	CP025660.1	CP025660	43	2.00341e-11	Ipomoea triloba cultivar NCNSP0323 chromosome 1	--	--	--	--	Q9LK48	282	6.3e-24	Transcription factor bHLH77 OS=Arabidopsis thaliana OX=3702 GN=BHLH77 PE=1 SV=1	PF00010	Helix-loop-helix DNA-binding domain	--	--	GO:0046983	protein dimerization activity	--	--	--	--	UP	1.095	2.4055e-09	blast,frame:-3 start:1010 end:147
Cluster-6558.8862-0R	AP2/ERF-ERF	AP2/ERF->AP2/ERF-ERF	Cluster-6558.8862	870869240	KMT19985.1	408	7e-37	hypothetical protein BVRB_1g000090 [Beta vulgaris subsp. vulgaris]	XM_010672279.2	XM_010672279	145	6.89857e-68	PREDICTED: Beta vulgaris subsp. vulgaris ethylene-responsive transcription factor ERF014 (LOC104887356), mRNA	--	--	--	--	Q9LPE8	238	1.4e-18	Ethylene-responsive transcription factor ERF014 OS=Arabidopsis thaliana OX=3702 GN=ERF014 PE=2 SV=1	PF00847//PF09026	AP2 domain//Centromere protein B dimerisation domain	GO:0006355	regulation of transcription, DNA-templated	GO:0003677//GO:0003682//GO:0003700	DNA binding//chromatin binding//DNA-binding transcription factor activity	GO:0000775//GO:0000785//GO:0005667//GO:0005634	chromosome, centromeric region//chromatin//transcription regulator complex//nucleus	--	--	UP	3.8137	5.3298e-235	blast,frame:-1 start:1381 end:482
Cluster-6558.11029-1F	GRAS	GRAS	Cluster-6558.11029	1219068515	XP_021760214.1	1975	1.6e-218	scarecrow-like protein 21 [Chenopodium quinoa]	XM_021904522.1	XM_021904522	753	0	PREDICTED: Chenopodium quinoa scarecrow-like protein 21 (LOC110725049), mRNA	--	--	--	--	G7L166	527	4.8e-52	GRAS family protein RAM1 OS=Medicago truncatula OX=3880 GN=RAM1 PE=2 SV=1	PF08491	Squalene epoxidase	GO:0016114//GO:0055114//GO:0006694	terpenoid biosynthetic process//oxidation-reduction process//steroid biosynthetic process	GO:0050660//GO:0004506	flavin adenine dinucleotide binding//squalene monooxygenase activity	GO:0016021	integral component of membrane	--	--	DOWN	-1.4671	2.1502e-05	blast,frame:2 start:194 end:1585
Cluster-6558.39709-1F	zf-HD	zf-HD	Cluster-6558.39709	731339784	XP_010681042.1	648	7.2e-65	PREDICTED: zinc-finger homeodomain protein 1 [Beta vulgaris subsp. vulgaris]	XM_021869712.1	XM_021869712	110	1.37095e-48	PREDICTED: Chenopodium quinoa zinc-finger homeodomain protein 1-like (LOC110692675), mRNA	--	--	--	--	Q6YXH5	558	7.5e-56	Zinc-finger homeodomain protein 1 OS=Oryza sativa subsp. japonica OX=39947 GN=ZHD1 PE=2 SV=1	PF02184	HAT (Half-A-TPR) repeat	GO:0006396	RNA processing	--	--	--	--	--	--	UP	1.3492	9.6687e-13	blast,frame:2 start:158 end:973
Cluster-6558.6309-0F	FAR1	FAR1	Cluster-6558.6309	731333378	XP_010677702.1	997	3e-105	PREDICTED: protein FAR1-RELATED SEQUENCE 6-like [Beta vulgaris subsp. vulgaris]	--	--	--	--	--	--	--	--	--	Q9SWG3	412	7.9e-39	Protein FAR-RED IMPAIRED RESPONSE 1 OS=Arabidopsis thaliana OX=3702 GN=FAR1 PE=1 SV=1	--	--	--	--	--	--	--	--	--	--	DOWN	-1.7973	6.7437e-08	blast,frame:1 start:412 end:1359
Cluster-6558.5227-2F	C3H	C3H	Cluster-6558.5227	1219123415	XP_021725009.1	1263	5.3e-136	zinc finger CCCH domain-containing protein 20-like isoform X1 [Chenopodium quinoa]	XM_021867791.1	XM_021867791	334	6.31801e-173	PREDICTED: Chenopodium quinoa zinc finger CCCH domain-containing protein 23-like (LOC110690891), mRNA	--	--	--	--	O82199	699	5.1e-72	Zinc finger CCCH domain-containing protein 20 OS=Arabidopsis thaliana OX=3702 GN=At2g19810 PE=2 SV=1	PF00642	Zinc finger C-x8-C-x5-C-x3-H type (and similar)	--	--	GO:0046872	metal ion binding	--	--	--	--	UP	1.0394	3.5167e-07	blast,frame:3 start:102 end:1193
Cluster-15025.0-2F	NAC	NAC	Cluster-15025.0	1045808166	ANV19798.1	764	2e-78	NAC6 [Haloxylon ammodendron]	KU534098.1	KU534098	417	0	Haloxylon ammodendron NAC6 mRNA, complete cds	--	--	--	--	Q9FY93	317	5.2e-28	NAC domain-containing protein 83 OS=Arabidopsis thaliana OX=3702 GN=NAC083 PE=1 SV=1	PF02365	No apical meristem (NAM) protein	GO:0006355	regulation of transcription, DNA-templated	GO:0003677	DNA binding	--	--	--	--	DOWN	-1.052	0.00025769	blast,frame:1 start:643 end:924|blast,frame:3 start:156 end:635
Cluster-6558.14693-1F	FAR1	FAR1	Cluster-6558.14693	1108957690	XP_019106544.1	2303	1.3e-256	PREDICTED: protein FAR1-RELATED SEQUENCE 5-like isoform X2 [Beta vulgaris subsp. vulgaris]	--	--	--	--	--	--	--	--	--	Q9SZL8	711	2e-73	Protein FAR1-RELATED SEQUENCE 5 OS=Arabidopsis thaliana OX=3702 GN=FRS5 PE=1 SV=1	PF06624//PF00872	Ribosome associated membrane protein RAMP4//Transposase, Mutator family	GO:0006313	transposition, DNA-mediated	GO:0003677//GO:0004803	DNA binding//transposase activity	GO:0005783	endoplasmic reticulum	--	--	DOWN	-2.2479	3.6344e-09	--
Cluster-6558.6634-0F	WRKY	WRKY	Cluster-6558.6634	1219119573	XP_021723068.1	494	3.9e-47	probable WRKY transcription factor 12 [Chenopodium quinoa]	XM_021990179.1	XM_021990179	229	7.11349e-115	PREDICTED: Spinacia oleracea probable WRKY transcription factor 75 (LOC110785694), mRNA	--	--	--	--	Q9FYA2	439	3.5e-42	Probable WRKY transcription factor 75 OS=Arabidopsis thaliana OX=3702 GN=WRKY75 PE=2 SV=1	PF03106//PF08127//PF12328	WRKY DNA -binding domain//Peptidase family C1 propeptide//Rpp20 subunit of nuclear RNase MRP and P	GO:0006508//GO:0050790//GO:0051252//GO:0006355//GO:0008033	proteolysis//regulation of catalytic activity//regulation of RNA metabolic process//regulation of transcription, DNA-templated//tRNA processing	GO:0004526//GO:0003700//GO:0043565//GO:0004197	ribonuclease P activity//DNA-binding transcription factor activity//sequence-specific DNA binding//cysteine-type endopeptidase activity	GO:0005634//GO:0005667//GO:0030677	nucleus//transcription regulator complex//ribonuclease P complex	--	--	DOWN	-1.0284	0.0017049	blast,frame:1 start:52 end:753
Cluster-6926.0-2F	TRAF	TRAF	Cluster-6926.0	1219166715	XP_021746987.1	1795	1.2e-197	regulatory protein NPR5-like [Chenopodium quinoa]	XM_021891295.1	XM_021891295	690	0	PREDICTED: Chenopodium quinoa regulatory protein NPR5-like (LOC110712842), mRNA	K14508	NPR1	regulatory protein NPR1	http://www.genome.jp/dbget-bin/www_bget?ko:K14508	Q9ZVC2	1540	1.6e-169	Regulatory protein NPR5 OS=Arabidopsis thaliana OX=3702 GN=NPR5 PE=1 SV=1	PF13606//PF00023//PF00651	Ankyrin repeat//Ankyrin repeat//BTB/POZ domain	--	--	GO:0005515	protein binding	--	--	--	--	UP	1.2922	3.6115e-10	blast,frame:3 start:225 end:1787
Cluster-6558.2089-0R	AP2/ERF-ERF	AP2/ERF->AP2/ERF-ERF	Cluster-6558.2089	1219063421	XP_021757611.1	608	5e-60	ethylene-responsive transcription factor CRF2-like [Chenopodium quinoa]	XM_010678050.2	XM_010678050	145	7.65082e-68	PREDICTED: Beta vulgaris subsp. vulgaris ethylene-responsive transcription factor CRF2 (LOC104892198), mRNA	--	--	--	--	Q9SUQ2	296	2.9e-25	Ethylene-responsive transcription factor CRF2 OS=Arabidopsis thaliana OX=3702 GN=CRF2 PE=1 SV=1	PF04934//PF00847	MED6 mediator sub complex component//AP2 domain	GO:0006355//GO:0006357	regulation of transcription, DNA-templated//regulation of transcription by RNA polymerase II	GO:0003712//GO:0003700	transcription coregulator activity//DNA-binding transcription factor activity	GO:0016592//GO:0005667	mediator complex//transcription regulator complex	--	--	UP	1.2488	1.1179e-08	blast,frame:-1 start:1529 end:345
Cluster-6558.3307-1R	bZIP	bZIP	Cluster-6558.3307	1219177075	XP_021752174.1	439	1.2e-40	transcription factor HY5-like isoform X1 [Chenopodium quinoa]	XM_021919014.1	XM_021919014	189	1.56251e-92	PREDICTED: Chenopodium quinoa transcription factor HY5-like (LOC110738622), mRNA	--	--	--	--	Q8W191	328	3.3e-29	Transcription factor HY5-like OS=Arabidopsis thaliana OX=3702 GN=HYH PE=1 SV=1	PF03131//PF07716//PF00170//PF08198	bZIP Maf transcription factor//Basic region leucine zipper//bZIP transcription factor//Thymopoietin protein	GO:0006355	regulation of transcription, DNA-templated	GO:0003677//GO:0003700	DNA binding//DNA-binding transcription factor activity	GO:0005667//GO:0005634	transcription regulator complex//nucleus	--	--	UP	1.0494	1.8421e-06	blast,frame:-2 start:853 end:341
Cluster-6558.11384-2F	FAR1	FAR1	Cluster-6558.11384	731324185	XP_010672835.1	1387	3.6e-150	PREDICTED: protein FAR1-RELATED SEQUENCE 5-like [Beta vulgaris subsp. vulgaris]	XM_021997162.1	XM_021997162	89	1.61051e-36	PREDICTED: Spinacia oleracea protein FAR1-RELATED SEQUENCE 8-like (LOC110792360), mRNA	--	--	--	--	Q9SZL8	612	1e-61	Protein FAR1-RELATED SEQUENCE 5 OS=Arabidopsis thaliana OX=3702 GN=FRS5 PE=1 SV=1	PF06524//PF04434	NOA36 protein//SWIM zinc finger	--	--	GO:0008270	zinc ion binding	GO:0005634	nucleus	--	--	UP	1.167	4.2973e-06	--
Cluster-6558.10915-0R	C2H2	C2H2	Cluster-6558.10915	870844795	KMS97674.1	1594	2.3e-174	hypothetical protein BVRB_5g124790 [Beta vulgaris subsp. vulgaris]	XM_010697120.2	XM_010697120	592	0	PREDICTED: Beta vulgaris subsp. vulgaris hypothetical protein (LOC104908063), mRNA	--	--	--	--	--	--	--	--	PF10152//PF07267//PF00096	Subunit CCDC53 of WASH complex//Nucleopolyhedrovirus capsid protein P87//Zinc finger, C2H2 type	--	--	GO:0003676	nucleic acid binding	GO:0019028//GO:0071203	viral capsid//WASH complex	--	--	UP	1.4754	1.5236e-11	blast,frame:-1 start:2029 end:653
Cluster-6558.30279-1F	NAC	NAC	Cluster-6558.30279	870869443	KMT20188.1	1347	7.9e-146	hypothetical protein BVRB_1g001950 [Beta vulgaris subsp. vulgaris]	XM_021893132.1	XM_021893132	371	0	PREDICTED: Chenopodium quinoa SUPPRESSOR OF GAMMA RESPONSE 1-like (LOC110714590), mRNA	--	--	--	--	Q6NQK2	672	5.6e-69	SUPPRESSOR OF GAMMA RESPONSE 1 OS=Arabidopsis thaliana OX=3702 GN=SOG1 PE=1 SV=1	PF02365	No apical meristem (NAM) protein	GO:0006355	regulation of transcription, DNA-templated	GO:0003677	DNA binding	--	--	--	--	DOWN	-1.1316	0.00068305	blast,frame:2 start:2 end:1234
Cluster-6558.36697-2R	bHLH	bHLH	Cluster-6558.36697	1219100092	XP_021776330.1	661	2.9e-66	transcription factor bHLH25-like [Chenopodium quinoa]	XM_010693500.1	XM_010693500	199	5.90456e-98	PREDICTED: Beta vulgaris subsp. vulgaris transcription factor bHLH25-like (LOC104905056), mRNA	--	--	--	--	Q9T072	365	2.3e-33	Transcription factor bHLH25 OS=Arabidopsis thaliana OX=3702 GN=BHLH25 PE=2 SV=2	PF04517//PF00010	Microvirus lysis protein (E), C terminus//Helix-loop-helix DNA-binding domain	GO:0019054	modulation by virus of host cellular process	GO:0046983//GO:0004857	protein dimerization activity//enzyme inhibitor activity	--	--	--	--	DOWN	-2.417	6.5449e-10	blast,frame:-3 start:1460 end:450
Cluster-6558.41763-1R	B3	B3->B3	Cluster-6558.41763	1219142514	XP_021734619.1	607	4.4e-60	B3 domain-containing protein REM16-like [Chenopodium quinoa]	XM_021878927.1	XM_021878927	174	3.8597e-84	PREDICTED: Chenopodium quinoa B3 domain-containing protein REM16-like (LOC110701298), mRNA	--	--	--	--	Q8RYD1	263	1.3e-21	B3 domain-containing protein REM16 OS=Arabidopsis thaliana OX=3702 GN=REM16 PE=2 SV=1	PF02362	B3 DNA binding domain	--	--	GO:0003677	DNA binding	--	--	--	--	UP	1.18	3.5564e-07	blast,frame:-2 start:1396 end:155
Cluster-6558.5496-2F	C2C2-CO-like	C2C2->C2C2-CO-like	Cluster-6558.5496	902191475	KNA11859.1	981	1.9e-103	hypothetical protein SOVF_131000 [Spinacia oleracea]	AY830922.1	AY830922	60	9.40669e-21	Pisum sativum CONSTANS-LIKE b (COLb) mRNA, complete cds	--	--	--	--	Q9FHH8	604	3.8e-61	Zinc finger protein CONSTANS-LIKE 5 OS=Arabidopsis thaliana OX=3702 GN=COL5 PE=2 SV=2	PF06203//PF04810//PF00643	CCT motif//Sec23/Sec24 zinc finger//B-box zinc finger	GO:0006888//GO:0006886	endoplasmic reticulum to Golgi vesicle-mediated transport//intracellular protein transport	GO:0008270//GO:0005515	zinc ion binding//protein binding	GO:0030127	COPII vesicle coat	--	--	UP	1.2253	1.832e-07	blast,frame:3 start:3 end:1298
Cluster-6558.1035-1F	NAC	NAC	Cluster-6558.1035	731311120	XP_010690154.1	1396	1.8e-151	PREDICTED: NAC domain-containing protein 43 [Beta vulgaris subsp. vulgaris]	XM_021911518.1	XM_021911518	488	0	PREDICTED: Chenopodium quinoa NAC domain-containing protein 43-like (LOC110731647), mRNA	--	--	--	--	Q84WP6	826	8.5e-87	NAC domain-containing protein 43 OS=Arabidopsis thaliana OX=3702 GN=NAC043 PE=2 SV=2	PF04548//PF02365	AIG1 family//No apical meristem (NAM) protein	GO:0006355	regulation of transcription, DNA-templated	GO:0005525//GO:0003677	GTP binding//DNA binding	--	--	--	--	UP	1.3513	4.5286e-11	blast,frame:2 start:212 end:1510
Cluster-8879.0-2R	AP2/ERF-ERF	AP2/ERF->AP2/ERF-ERF	Cluster-8879.0	870868148	KMT19017.1	702	3.3e-71	hypothetical protein BVRB_2g031130 [Beta vulgaris subsp. vulgaris]	XM_010667538.2	XM_010667538	419	0	PREDICTED: Beta vulgaris subsp. vulgaris ethylene-responsive transcription factor ERF003 (LOC104883082), mRNA	--	--	--	--	Q94AW5	425	1.6e-40	Ethylene-responsive transcription factor ERF003 OS=Arabidopsis thaliana OX=3702 GN=ERF003 PE=2 SV=1	PF00847	AP2 domain	GO:0006355	regulation of transcription, DNA-templated	GO:0003700	DNA-binding transcription factor activity	GO:0005667	transcription regulator complex	--	--	UP	1.0476	0.0001658	blast,frame:-3 start:1132 end:461
Cluster-6558.2393-2R	LOB	LOB	Cluster-6558.2393	870843163	KMS96395.1	702	3.1e-71	hypothetical protein BVRB_9g225500 [Beta vulgaris subsp. vulgaris]	XM_010667728.2	XM_010667728	253	3.38423e-128	PREDICTED: Beta vulgaris subsp. vulgaris LOB domain-containing protein 1 (LOC104883246), mRNA	--	--	--	--	Q9SK08	515	5.6e-51	LOB domain-containing protein 11 OS=Arabidopsis thaliana OX=3702 GN=LBD11 PE=2 SV=2	PF05837	Centromere protein H (CENP-H)	GO:0051382	kinetochore assembly	--	--	GO:0000776	kinetochore	--	--	UP	1.1388	6.7867e-07	blast,frame:-3 start:947 end:354
Cluster-6558.7778-1R	C2H2	C2H2	Cluster-6558.7778	1219069105	XP_021760513.1	1580	8e-173	uncharacterized protein LOC110725329 [Chenopodium quinoa]	XM_010694259.2	XM_010694259	545	0	PREDICTED: Beta vulgaris subsp. vulgaris hypothetical protein (LOC104905404), mRNA	--	--	--	--	--	--	--	--	PF08119//PF00096//PF14369//PF00644	Scorpion acidic alpha-KTx toxin family//Zinc finger, C2H2 type//zinc-ribbon//Poly(ADP-ribose) polymerase catalytic domain	GO:0006810//GO:0009405	transport//pathogenesis	GO:0003676//GO:0061630//GO:0019870//GO:0003950	nucleic acid binding//ubiquitin protein ligase activity//potassium channel inhibitor activity//NAD+ ADP-ribosyltransferase activity	GO:0005576	extracellular region	--	--	UP	1.1319	1.0925e-06	blast,frame:-2 start:1732 end:320
Cluster-6558.41498-0R	GRF	GRF	Cluster-6558.41498	870842898	KMS96188.1	678	2.9e-68	hypothetical protein BVRB_000980 [Beta vulgaris subsp. vulgaris]	XM_010667960.2	XM_010667960	489	0	PREDICTED: Beta vulgaris subsp. vulgaris growth-regulating factor 1 (LOC104883432), mRNA	--	--	--	--	Q8L8A6	444	1.5e-42	Growth-regulating factor 5 OS=Arabidopsis thaliana OX=3702 GN=GRF5 PE=1 SV=1	PF08880//PF00520	QLQ//Ion transport protein	GO:0006355//GO:0055085//GO:0006811	regulation of transcription, DNA-templated//transmembrane transport//ion transport	GO:0005216//GO:0005524	ion channel activity//ATP binding	GO:0005634//GO:0016020	nucleus//membrane	--	--	UP	1.4041	1.4892e-10	blast,frame:-1 start:1589 end:330
Cluster-6558.4365-2R	SRS	SRS	Cluster-6558.4365	870863429	KMT14593.1	879	1.7e-91	hypothetical protein BVRB_4g073630 [Beta vulgaris subsp. vulgaris]	XM_021878532.1	XM_021878532	356	0	PREDICTED: Chenopodium quinoa protein LATERAL ROOT PRIMORDIUM 1-like (LOC110700968), mRNA	--	--	--	--	Q94CK9	475	4.5e-46	Protein LATERAL ROOT PRIMORDIUM 1 OS=Arabidopsis thaliana OX=3702 GN=LRP1 PE=1 SV=1	--	--	--	--	--	--	--	--	--	--	UP	1.3088	9.5279e-08	blast,frame:-3 start:1433 end:51
Cluster-14732.0-0R	GRAS	GRAS	Cluster-14732.0	731353508	XP_010688103.1	1764	3.8e-194	PREDICTED: DELLA protein GAI1 [Beta vulgaris subsp. vulgaris]	XM_010689801.1	XM_010689801	550	0	PREDICTED: Beta vulgaris subsp. vulgaris DELLA protein GAI1 (LOC104902119), mRNA	K14494	DELLA	DELLA protein	http://www.genome.jp/dbget-bin/www_bget?ko:K14494	Q8S4W7	991	6.3e-106	DELLA protein GAI1 OS=Vitis vinifera OX=29760 GN=GAI1 PE=2 SV=1	PF17049//PF15335	ATPase expression protein 1//Caspase activity and apoptosis inhibitor 1	GO:0042981//GO:0006417	regulation of apoptotic process//regulation of translation	GO:0045182	translation regulator activity	--	--	--	--	UP	1.0151	4.7837e-05	blast,frame:-1 start:1577 end:120
Cluster-12465.0-0F	MYB	MYB->MYB	Cluster-12465.0	1219087375	XP_021769863.1	789	2.8e-81	transcription factor MYB2-like [Chenopodium quinoa]	XM_003591311.3	XM_003591311	61	2.046e-21	PREDICTED: Medicago truncatula transcription factor MYB108 (LOC11416785), mRNA	K09422	MYBP	myb proto-oncogene protein, plant	http://www.genome.jp/dbget-bin/www_bget?ko:K09422	Q10MB4	507	5.3e-50	Transcription factor MYB2 OS=Oryza sativa subsp. japonica OX=39947 GN=MYB2 PE=2 SV=1	--	--	--	--	--	--	--	--	--	--	DOWN	-2.6841	2.665e-08	blast,frame:1 start:1 end:981
Cluster-6558.13544-2R	C2C2-GATA	C2C2->C2C2-GATA	Cluster-6558.13544	731326696	XP_010674149.1	422	9.6e-39	PREDICTED: GATA transcription factor 16 [Beta vulgaris subsp. vulgaris]	XM_002512438.3	XM_002512438	53	5.46164e-17	PREDICTED: Ricinus communis GATA transcription factor 15 (LOC8269795), mRNA	--	--	--	--	Q9LIB5	197	4.5e-14	GATA transcription factor 17 OS=Arabidopsis thaliana OX=3702 GN=GATA17 PE=2 SV=1	PF00320//PF01412	GATA zinc finger//Putative GTPase activating protein for Arf	GO:0006355	regulation of transcription, DNA-templated	GO:0005096//GO:0008270//GO:0043565	GTPase activator activity//zinc ion binding//sequence-specific DNA binding	--	--	--	--	UP	1.1392	1.961e-06	blast,frame:-3 start:813 end:358
Cluster-6558.29825-2R	RWP-RK	RWP-RK	Cluster-6558.29825	1226830933	XP_021864640.1	551	1.3e-53	uncharacterized protein LOC110803441 [Spinacia oleracea]	--	--	--	--	--	--	--	--	--	Q84TH9	152	9.3e-09	Protein NLP7 OS=Arabidopsis thaliana OX=3702 GN=NLP7 PE=1 SV=2	PF00564//PF02796//PF02954	PB1 domain//Helix-turn-helix domain of resolvase//Bacterial regulatory protein, Fis family	GO:0006310	DNA recombination	GO:0005515//GO:0000150//GO:0043565//GO:0003677	protein binding//recombinase activity//sequence-specific DNA binding//DNA binding	--	--	--	--	DOWN	-3.4661	2.7051e-09	blast,frame:-3 start:1430 end:84
Cluster-6558.3577-1F	FAR1	FAR1	Cluster-6558.3577	1219057519	XP_021754501.1	1141	1.5e-121	protein FAR-RED ELONGATED HYPOCOTYL 3-like [Chenopodium quinoa]	XM_021868240.1	XM_021868240	58	3.4383e-19	PREDICTED: Chenopodium quinoa protein FAR1-RELATED SEQUENCE 6-like (LOC110691318), mRNA	--	--	--	--	Q9SWG3	595	1.2e-59	Protein FAR-RED IMPAIRED RESPONSE 1 OS=Arabidopsis thaliana OX=3702 GN=FAR1 PE=1 SV=1	PF02362	B3 DNA binding domain	--	--	GO:0003677	DNA binding	--	--	--	--	UP	1.025	3.785e-05	blast,frame:2 start:923 end:1690
Cluster-6558.4165-0R	MYB	MYB->MYB	Cluster-6558.4165	1219101914	XP_021714183.1	1334	1.9e-144	transcription factor MYB16-like [Chenopodium quinoa]	XM_021858491.1	XM_021858491	548	0	PREDICTED: Chenopodium quinoa transcription factor MYB16-like (LOC110682220), mRNA	K09422	MYBP	myb proto-oncogene protein, plant	http://www.genome.jp/dbget-bin/www_bget?ko:K09422	Q9SBF3	781	9.5e-82	Transcription factor MYB92 OS=Arabidopsis thaliana OX=3702 GN=MYB92 PE=1 SV=1	PF09111	SLIDE	GO:0006338	chromatin remodeling	GO:0016818//GO:0005524//GO:0003676	hydrolase activity, acting on acid anhydrides, in phosphorus-containing anhydrides//ATP binding//nucleic acid binding	GO:0005634	nucleus	--	--	UP	1.2289	4.7421e-06	blast,frame:-1 start:1193 end:162
Cluster-12194.0-2R	bZIP	bZIP	Cluster-12194.0	1219117599	XP_021722055.1	1944	5.8e-215	transcription factor TGA9-like isoform X2 [Chenopodium quinoa]	XM_021866363.1	XM_021866363	776	0	PREDICTED: Chenopodium quinoa transcription factor TGA9-like (LOC110689602), transcript variant X3, mRNA	K14431	TGA	transcription factor TGA	http://www.genome.jp/dbget-bin/www_bget?ko:K14431	Q93XM6	1330	3.5e-145	Transcription factor TGA9 OS=Arabidopsis thaliana OX=3702 GN=TGA9 PE=1 SV=1	PF14144//PF00170//PF00870//PF07716	Seed dormancy control//bZIP transcription factor//P53 DNA-binding domain//Basic region leucine zipper	GO:0006351//GO:0006355	transcription, DNA-templated//regulation of transcription, DNA-templated	GO:0043565//GO:0003700	sequence-specific DNA binding//DNA-binding transcription factor activity	GO:0005667	transcription regulator complex	--	--	UP	1.5401	1.1223e-08	blast,frame:-3 start:1864 end:257
Cluster-6558.35271-2F	bHLH	bHLH	Cluster-6558.35271	731374485	XP_010666979.1	783	1.9e-80	PREDICTED: transcription factor bHLH18-like [Beta vulgaris subsp. vulgaris]	XM_018958221.1	XM_018958221	45	2.24398e-12	PREDICTED: Juglans regia transcription factor bHLH25-like (LOC108985799), mRNA	--	--	--	--	Q1PF17	399	2.5e-37	Transcription factor bHLH18 OS=Arabidopsis thaliana OX=3702 GN=BHLH18 PE=1 SV=1	PF00010//PF03387	Helix-loop-helix DNA-binding domain//Herpesvirus UL46 protein	GO:0006355	regulation of transcription, DNA-templated	GO:0046983	protein dimerization activity	--	--	--	--	UP	1.7196	4.789e-12	blast,frame:3 start:141 end:1271
Cluster-6558.32386-2R	bHLH	bHLH	Cluster-6558.32386	731346065	XP_010684257.1	604	1.3e-59	PREDICTED: basic helix-loop-helix protein A [Beta vulgaris subsp. vulgaris]	XM_021872183.1	XM_021872183	129	5.4788e-59	PREDICTED: Chenopodium quinoa basic helix-loop-helix protein A-like (LOC110694991), mRNA	--	--	--	--	A0A2R6QE26	461	1.9e-44	Transcription factor BHLH42 OS=Actinidia chinensis var. chinensis OX=1590841 GN=BHLH42 PE=1 SV=1	PF00901	Orbivirus outer capsid protein VP5	--	--	GO:0005198	structural molecule activity	GO:0019028	viral capsid	--	--	DOWN	-1.0191	0.041483	blast,frame:-2 start:955 end:842
Cluster-8984.0-0R	bHLH	bHLH	Cluster-8984.0	1219178107	XP_021752717.1	974	1.4e-102	transcription factor SPATULA-like [Chenopodium quinoa]	XM_010669114.2	XM_010669114	276	8.55736e-141	PREDICTED: Beta vulgaris subsp. vulgaris transcription factor SPATULA (LOC104884465), transcript variant X2, mRNA	--	--	--	--	Q9FUA4	422	5.2e-40	Transcription factor SPATULA OS=Arabidopsis thaliana OX=3702 GN=SPT PE=1 SV=1	PF12474//PF00010//PF01649	Polo kinase kinase//Helix-loop-helix DNA-binding domain//Ribosomal protein S20	GO:0042254//GO:0006412//GO:0009069//GO:0016310	ribosome biogenesis//translation//serine family amino acid metabolic process//phosphorylation	GO:0003735//GO:0046983//GO:0004674//GO:0003723	structural constituent of ribosome//protein dimerization activity//protein serine/threonine kinase activity//RNA binding	GO:0005840	ribosome	--	--	DOWN	-1.3323	0.00077017	blast,frame:-1 start:1581 end:421
Cluster-6558.2973-2F	AP2/ERF-ERF	AP2/ERF->AP2/ERF-ERF	Cluster-6558.2973	870868069	KMT18938.1	651	3e-65	hypothetical protein BVRB_2g030370 [Beta vulgaris subsp. vulgaris]	XM_010698014.2	XM_010698014	298	3.93385e-153	PREDICTED: Beta vulgaris subsp. vulgaris ethylene-responsive transcription factor WIN1 (LOC104908848), mRNA	--	--	--	--	Q9XI33	445	8.8e-43	Ethylene-responsive transcription factor WIN1 OS=Arabidopsis thaliana OX=3702 GN=WIN1 PE=2 SV=1	PF00847	AP2 domain	GO:0006355	regulation of transcription, DNA-templated	GO:0003700	DNA-binding transcription factor activity	GO:0005667	transcription regulator complex	--	--	UP	1.1845	2.1997e-05	blast,frame:3 start:288 end:1031
Cluster-6558.739-0F	C2H2	C2H2	Cluster-6558.739	1219140057	XP_021733369.1	1847	1.2e-203	zinc finger protein NUTCRACKER-like isoform X1 [Chenopodium quinoa]	XM_021877677.1	XM_021877677	764	0	PREDICTED: Chenopodium quinoa zinc finger protein NUTCRACKER-like (LOC110700166), transcript variant X1, mRNA	--	--	--	--	Q9ZWA6	998	1.2e-106	Zinc finger protein MAGPIE OS=Arabidopsis thaliana OX=3702 GN=MGP PE=1 SV=1	PF04277//PF04810//PF08496//PF00096	Oxaloacetate decarboxylase, gamma chain//Sec23/Sec24 zinc finger//Peptidase family S49 N-terminal//Zinc finger, C2H2 type	GO:0006090//GO:0006888//GO:0006886//GO:0036376//GO:0006814//GO:0006525//GO:0006560	pyruvate metabolic process//endoplasmic reticulum to Golgi vesicle-mediated transport//intracellular protein transport//sodium ion export across plasma membrane//sodium ion transport//arginine metabolic process//proline metabolic process	GO:0015081//GO:0008270//GO:0004252//GO:0003676//GO:0008948	sodium ion transmembrane transporter activity//zinc ion binding//serine-type endopeptidase activity//nucleic acid binding//oxaloacetate decarboxylase activity	GO:0005886//GO:0030127//GO:0016020	plasma membrane//COPII vesicle coat//membrane	--	--	UP	1.0565	0.00010915	blast,frame:1 start:220 end:1773
Cluster-10642.0-2F	GNAT	GNAT	Cluster-10642.0	1219164038	XP_021745642.1	742	5e-76	uncharacterized protein LOC110711537 [Chenopodium quinoa]	XM_021997067.1	XM_021997067	345	1.71308e-179	PREDICTED: Spinacia oleracea uncharacterized N-acetyltransferase p20-like (LOC110792248), mRNA	--	--	--	--	P05332	156	1.7e-09	Uncharacterized N-acetyltransferase p20 OS=Bacillus licheniformis OX=1402 GN=p20 PE=4 SV=1	PF00583//PF08445//PF13302	Acetyltransferase (GNAT) family//FR47-like protein//Acetyltransferase (GNAT) domain	GO:0042967	obsolete acyl-carrier-protein biosynthetic process	GO:0008080//GO:0016747	N-acetyltransferase activity//transferase activity, transferring acyl groups other than amino-acyl groups	--	--	--	--	UP	1.3233	3.7148e-05	blast,frame:3 start:21 end:593
Cluster-6558.2974-1F	AP2/ERF-ERF	AP2/ERF->AP2/ERF-ERF	Cluster-6558.2974	870868069	KMT18938.1	493	5.5e-47	hypothetical protein BVRB_2g030370 [Beta vulgaris subsp. vulgaris]	XM_010698014.2	XM_010698014	181	3.7269e-88	PREDICTED: Beta vulgaris subsp. vulgaris ethylene-responsive transcription factor WIN1 (LOC104908848), mRNA	--	--	--	--	Q9XI33	310	3.5e-27	Ethylene-responsive transcription factor WIN1 OS=Arabidopsis thaliana OX=3702 GN=WIN1 PE=2 SV=1	PF04990//PF15549	RNA polymerase Rpb1, domain 7//PGC7/Stella/Dppa3 domain	GO:0006206//GO:0006351//GO:0006144	pyrimidine nucleobase metabolic process//transcription, DNA-templated//purine nucleobase metabolic process	GO:0003677//GO:0035064//GO:0003899	DNA binding//methylated histone binding//DNA-directed 5'-3' RNA polymerase activity	GO:0005730	nucleolus	--	--	DOWN	-1.1035	0.013038	blast,frame:2 start:269 end:865
Cluster-9250.0-1F	MYB	MYB->MYB	Cluster-9250.0	731374667	XP_010667031.1	659	5.4e-66	PREDICTED: transcription factor MYB114-like [Beta vulgaris subsp. vulgaris]	XM_010668729.1	XM_010668729	273	4.74268e-139	PREDICTED: Beta vulgaris subsp. vulgaris transcription factor MYB114-like (LOC104884133), mRNA	K09422	MYBP	myb proto-oncogene protein, plant	http://www.genome.jp/dbget-bin/www_bget?ko:K09422	A0A4D6QCQ2	469	2.2e-45	Transcription factor MYB3 OS=Crocosmia x crocosmiiflora OX=1053288 GN=MYB3 PE=2 SV=1	PF01396//PF09198//PF00643	Topoisomerase DNA binding C4 zinc finger//Bacteriophage T4 beta-glucosyltransferase//B-box zinc finger	GO:0006265//GO:0099018	DNA topological change//restriction-modification system evasion by virus	GO:0003677//GO:0033821//GO:0003916//GO:0008270	DNA binding//DNA beta-glucosyltransferase activity//DNA topoisomerase activity//zinc ion binding	GO:0005694	chromosome	--	--	DOWN	-2.1301	2.2971e-06	blast,frame:2 start:1190 end:1744
Cluster-6558.970-0R	AP2/ERF-ERF	AP2/ERF->AP2/ERF-ERF	Cluster-6558.970	1219126277	XP_021726490.1	449	6.2e-42	ethylene-responsive transcription factor 12-like [Chenopodium quinoa]	LN713266.1	LN713266	103	7.59998e-45	Cucumis melo genomic chromosome, chr_12	--	--	--	--	Q94ID6	323	9.6e-29	Ethylene-responsive transcription factor 12 OS=Arabidopsis thaliana OX=3702 GN=ERF12 PE=1 SV=1	PF00847	AP2 domain	GO:0006355	regulation of transcription, DNA-templated	GO:0003700	DNA-binding transcription factor activity	GO:0005667	transcription regulator complex	--	--	UP	2.0709	2.3656e-16	blast,frame:-1 start:990 end:298
Cluster-10056.0-1R	SBP	SBP	Cluster-10056.0	1219100903	XP_021713647.1	1255	4.1e-135	squamosa promoter-binding-like protein 16 isoform X1 [Chenopodium quinoa]	XM_010681697.2	XM_010681697	489	0	PREDICTED: Beta vulgaris subsp. vulgaris squamosa promoter-binding-like protein 16 (LOC104895242), transcript variant X2, mRNA	--	--	--	--	Q6YZE8	427	1.6e-40	Squamosa promoter-binding-like protein 16 OS=Oryza sativa subsp. japonica OX=39947 GN=SPL16 PE=2 SV=1	PF03110	SBP domain	--	--	GO:0003677	DNA binding	GO:0005634	nucleus	--	--	UP	1.8708	5.009e-13	blast,frame:-2 start:1388 end:297
Cluster-14530.0-1R	MYB	MYB->MYB	Cluster-14530.0	870859892	KMT11267.1	867	2e-90	hypothetical protein BVRB_5g110160 [Beta vulgaris subsp. vulgaris]	XM_010679560.2	XM_010679560	299	8.02734e-154	PREDICTED: Beta vulgaris subsp. vulgaris myb-related protein 305 (LOC104893454), mRNA	K09422	MYBP	myb proto-oncogene protein, plant	http://www.genome.jp/dbget-bin/www_bget?ko:K09422	P81396	630	2.3e-64	Myb-related protein 340 OS=Antirrhinum majus OX=4151 GN=MYB340 PE=2 SV=1	--	--	--	--	--	--	--	--	--	--	DOWN	-2.5141	4.6433e-05	blast,frame:-2 start:945 end:220
Cluster-6558.33920-2F	bHLH	bHLH	Cluster-6558.33920	1219118507	XP_021722527.1	782	2.3e-80	transcription factor bHLH61-like [Chenopodium quinoa]	XM_021866835.1	XM_021866835	343	4.48086e-178	PREDICTED: Chenopodium quinoa transcription factor bHLH61-like (LOC110690011), mRNA	--	--	--	--	Q9LSL1	612	4.5e-62	Transcription factor bHLH93 OS=Arabidopsis thaliana OX=3702 GN=BHLH93 PE=1 SV=1	PF00010	Helix-loop-helix DNA-binding domain	--	--	GO:0046983	protein dimerization activity	--	--	--	--	UP	2.1409	2.4855e-21	blast,frame:3 start:132 end:1235
Cluster-6558.11604-2R	FAR1	FAR1	Cluster-6558.11604	731353731	XP_010688210.1	535	2.2e-51	PREDICTED: protein FAR1-RELATED SEQUENCE 6-like [Beta vulgaris subsp. vulgaris]	--	--	--	--	--	--	--	--	--	--	--	--	--	PF00737//PF03587	Photosystem II 10 kDa phosphoprotein//EMG1/NEP1 methyltransferase	GO:0050821//GO:0015979	protein stabilization//photosynthesis	GO:0008168//GO:0042301	methyltransferase activity//phosphate ion binding	GO:0009523//GO:0016020	photosystem II//membrane	--	--	UP	2.3067	6.8521e-22	--
Cluster-13234.0-2F	C2H2	C2H2	Cluster-13234.0	1219080503	XP_021766386.1	1023	3.1e-108	protein SENSITIVE TO PROTON RHIZOTOXICITY 2-like [Chenopodium quinoa]	XM_021868729.1	XM_021868729	222	9.94721e-111	PREDICTED: Chenopodium quinoa protein SENSITIVE TO PROTON RHIZOTOXICITY 2-like (LOC110691781), mRNA	--	--	--	--	Q0WT24	624	2.2e-63	Protein SENSITIVE TO PROTON RHIZOTOXICITY 2 OS=Arabidopsis thaliana OX=3702 GN=STOP2 PE=2 SV=1	PF00096	Zinc finger, C2H2 type	--	--	GO:0003676	nucleic acid binding	--	--	--	--	DOWN	-1.2605	0.0068858	blast,frame:3 start:180 end:1322
Cluster-6558.9572-0R	C2H2	C2H2	Cluster-6558.9572	902196881	KNA13254.1	1674	1.3e-183	hypothetical protein SOVF_118420 [Spinacia oleracea]	XM_010695971.2	XM_010695971	496	0	PREDICTED: Beta vulgaris subsp. vulgaris hypothetical protein (LOC104907097), mRNA	--	--	--	--	--	--	--	--	PF00096	Zinc finger, C2H2 type	--	--	GO:0003676	nucleic acid binding	--	--	--	--	UP	1.0306	0.00011993	blast,frame:-1 start:1761 end:223
Cluster-11503.0-2R	NAC	NAC	Cluster-11503.0	1052230980	AOC59213.1	1881	8.4e-208	NAC transcription factor 33 [Haloxylon ammodendron]	KU845321.1	KU845321	1181	0	Haloxylon ammodendron NAC transcription factor 33 mRNA, complete cds	--	--	--	--	Q84TE6	796	2.1e-83	NAC domain-containing protein 21/22 OS=Arabidopsis thaliana OX=3702 GN=NAC021 PE=1 SV=2	PF03558//PF02365//PF05297	TBSV core protein P21/P22//No apical meristem (NAM) protein//Herpesvirus latent membrane protein 1 (LMP1)	GO:0006355//GO:0019087	regulation of transcription, DNA-templated//transformation of host cell by virus	GO:0003677	DNA binding	GO:0019028//GO:0016021	viral capsid//integral component of membrane	--	--	UP	1.1897	3.9721e-05	blast,frame:-3 start:1354 end:308
Cluster-6558.37131-0F	Coactivator p15	Coactivator p15	Cluster-6558.37131	1600621722	TEY11873.1	229	2.3e-16	protein disulfide-isomerase A1 [Salvia splendens]	XM_010677960.2	XM_010677960	58	9.05014e-20	PREDICTED: Beta vulgaris subsp. vulgaris RNA polymerase II transcriptional coactivator KELP (LOC104892128), mRNA	K13566	NIT2	omega-amidase	http://www.genome.jp/dbget-bin/www_bget?ko:K13566	O48773	206	4.1e-15	Protein disulfide-isomerase 2-3 OS=Arabidopsis thaliana OX=3702 GN=PDIL2-3 PE=2 SV=1	--	--	--	--	--	--	--	--	KOG0191	Thioredoxin/protein disulfide isomerase	UP	2.9482	2.528e-30	blast,frame:2 start:395 end:661
Cluster-6558.20559-0R	AUX/IAA	AUX/IAA	Cluster-6558.20559	1219137466	XP_021732096.1	693	3.4e-70	auxin-induced protein IAA6-like [Chenopodium quinoa]	XM_021876404.1	XM_021876404	251	4.41592e-127	PREDICTED: Chenopodium quinoa auxin-induced protein IAA6-like (LOC110698899), mRNA	K14484	IAA	auxin-responsive protein IAA	http://www.genome.jp/dbget-bin/www_bget?ko:K14484	P13088	475	2.5e-46	Auxin-induced protein AUX22 OS=Glycine max OX=3847 GN=AUX22 PE=2 SV=1	PF00564	PB1 domain	--	--	GO:0005515	protein binding	--	--	--	--	UP	1.0503	0.00048607	blast,frame:-1 start:976 end:314
Cluster-6558.8078-1R	NAC	NAC	Cluster-6558.8078	1052230984	AOC59215.1	990	1.1e-104	NAC transcription factor 42 [Haloxylon ammodendron]	KU845323.1	KU845323	902	0	Haloxylon ammodendron NAC transcription factor 42 mRNA, complete cds	--	--	--	--	Q8GWK6	611	3.6e-62	NAC domain-containing protein 104 OS=Arabidopsis thaliana OX=3702 GN=NAC104 PE=2 SV=1	PF02365	No apical meristem (NAM) protein	GO:0006355	regulation of transcription, DNA-templated	GO:0003677	DNA binding	--	--	--	--	UP	1.0479	0.0061094	blast,frame:-2 start:815 end:225
Cluster-6558.26652-1R	C3H	C3H	Cluster-6558.26652	1226812365	XP_021855428.1	273	9.5e-22	zinc finger CCCH domain-containing protein 1 [Spinacia oleracea]	XM_010669437.2	XM_010669437	89	2.70611e-37	PREDICTED: Beta vulgaris subsp. vulgaris zinc finger CCCH domain-containing protein 1-like (LOC104884748), mRNA	K13127	RNF113A, CWC24	RING finger protein 113A	http://www.genome.jp/dbget-bin/www_bget?ko:K13127	Q8GX84	254	5.8e-21	Zinc finger CCCH domain-containing protein 1 OS=Arabidopsis thaliana OX=3702 GN=At1g01350 PE=2 SV=2	PF00097//PF16685//PF00642	Zinc finger, C3HC4 type (RING finger)//zinc RING finger of MSL2//Zinc finger C-x8-C-x5-C-x3-H type (and similar)	--	--	GO:0061630//GO:0046872	ubiquitin protein ligase activity//metal ion binding	--	--	KOG1813	Predicted E3 ubiquitin ligase	DOWN	-2.6782	0.00040413	blast,frame:-1 start:420 end:208
Cluster-6558.12829-2R	FAR1	FAR1	Cluster-6558.12829	1219097316	XP_021774928.1	487	2e-46	protein FAR1-RELATED SEQUENCE 5-like [Chenopodium quinoa]	XM_021896729.1	XM_021896729	237	1.97018e-119	PREDICTED: Chenopodium quinoa protein FAR1-RELATED SEQUENCE 5-like (LOC110717929), mRNA	--	--	--	--	--	--	--	--	PF09034	TRADD, N-terminal domain	GO:0043123	positive regulation of I-kappaB kinase/NF-kappaB signaling	GO:0005515	protein binding	--	--	--	--	DOWN	-1.0208	0.02159	blast,frame:-3 start:711 end:337
Cluster-6558.9307-1F	AP2/ERF-ERF	AP2/ERF->AP2/ERF-ERF	Cluster-6558.9307	731311250	XP_010696241.1	618	2.7e-61	PREDICTED: ethylene-responsive transcription factor ERF023 [Beta vulgaris subsp. vulgaris]	--	--	--	--	--	K09286	EREBP	EREBP-like factor	http://www.genome.jp/dbget-bin/www_bget?ko:K09286	Q1ECI2	415	3.5e-39	Ethylene-responsive transcription factor ERF023 OS=Arabidopsis thaliana OX=3702 GN=ERF023 PE=2 SV=1	PF00847	AP2 domain	GO:0006355	regulation of transcription, DNA-templated	GO:0003700	DNA-binding transcription factor activity	GO:0005667	transcription regulator complex	--	--	UP	1.0841	0.0017478	blast,frame:2 start:209 end:787
Cluster-13403.0-2R	SNF2	SNF2	Cluster-13403.0	1219136758	XP_021731740.1	3815	0	protein CHROMATIN REMODELING 25-like [Chenopodium quinoa]	XM_021876048.1	XM_021876048	1581	0	PREDICTED: Chenopodium quinoa protein CHROMATIN REMODELING 25-like (LOC110698589), mRNA	K10875	RAD54L, RAD54	DNA repair and recombination protein RAD54 and RAD54-like protein	http://www.genome.jp/dbget-bin/www_bget?ko:K10875	Q0PCS3	2876	0	Protein CHROMATIN REMODELING 25 OS=Arabidopsis thaliana OX=3702 GN=CHR25 PE=1 SV=1	PF00270//PF11496//PF00176//PF04851	DEAD/DEAH box helicase//Class II histone deacetylase complex subunits 2 and 3//SNF2 family N-terminal domain//Type III restriction enzyme, res subunit	GO:0016575	histone deacetylation	GO:0005524//GO:0003677//GO:0003676//GO:0016787	ATP binding//DNA binding//nucleic acid binding//hydrolase activity	GO:0070823	HDA1 complex	KOG0390	DNA repair protein, SNF2 family	UP	1.3494	3.1808e-05	blast,frame:-3 start:3429 end:601
Cluster-6461.0-0F	B3	B3->B3	Cluster-6461.0	870846940	KMS99399.1	594	1.7e-58	hypothetical protein BVRB_2g045220 [Beta vulgaris subsp. vulgaris]	--	--	--	--	--	--	--	--	--	P0DH85	346	3.6e-31	B3 domain-containing protein REM10 OS=Arabidopsis thaliana OX=3702 GN=REM10 PE=1 SV=1	PF02362	B3 DNA binding domain	--	--	GO:0003677	DNA binding	--	--	--	--	UP	1.838	2.7175e-05	blast,frame:1 start:28 end:1272
Cluster-6558.832-2R	MYB	MYB->MYB	Cluster-6558.832	1219089332	XP_021770845.1	1209	7.8e-130	transcription factor MYB106-like [Chenopodium quinoa]	XM_010671937.2	XM_010671937	322	2.34409e-166	PREDICTED: Beta vulgaris subsp. vulgaris transcription factor MYB36-like (LOC104887322), mRNA	K09422	MYBP	myb proto-oncogene protein, plant	http://www.genome.jp/dbget-bin/www_bget?ko:K09422	Q9LE63	812	3.2e-85	Transcription factor MYB106 OS=Arabidopsis thaliana OX=3702 GN=MYB106 PE=2 SV=1	--	--	--	--	--	--	--	--	--	--	UP	1.4887	8.9423e-05	blast,frame:-3 start:1657 end:137
Cluster-6558.25579-0F	C2C2-LSD	C2C2->C2C2-LSD	Cluster-6558.25579	1219041332	XP_021737721.1	209	9.7e-14	protein LSD1-like [Chenopodium quinoa]	XM_021882029.1	XM_021882029	91	8.41777e-38	PREDICTED: Chenopodium quinoa protein LSD1-like (LOC110704213), mRNA	--	--	--	--	Q6ASS2	165	4.7e-10	Protein LOL3 OS=Oryza sativa subsp. japonica OX=39947 GN=LOL3 PE=2 SV=1	--	--	--	--	--	--	--	--	--	--	DOWN	-2.6008	0.00011963	blast,frame:1 start:865 end:1122
Cluster-6558.25579-1F	C2C2-LSD	C2C2->C2C2-LSD	Cluster-6558.25579	1219041332	XP_021737721.1	209	9.7e-14	protein LSD1-like [Chenopodium quinoa]	XM_021882029.1	XM_021882029	91	8.41777e-38	PREDICTED: Chenopodium quinoa protein LSD1-like (LOC110704213), mRNA	--	--	--	--	Q6ASS2	165	4.7e-10	Protein LOL3 OS=Oryza sativa subsp. japonica OX=39947 GN=LOL3 PE=2 SV=1	--	--	--	--	--	--	--	--	--	--	DOWN	-2.6008	0.00011963	blast,frame:1 start:865 end:1122
Cluster-15870.0-0R	AP2/ERF-AP2	AP2/ERF->AP2/ERF-AP2	Cluster-15870.0	902163130	KNA06779.1	972	2.2e-102	hypothetical protein SOVF_177870 isoform B [Spinacia oleracea]	XM_021894417.1	XM_021894417	365	0	PREDICTED: Chenopodium quinoa AP2-like ethylene-responsive transcription factor At1g79700 (LOC110715802), mRNA	K09285	OVM, ANT	AP2-like factor, ANT lineage	http://www.genome.jp/dbget-bin/www_bget?ko:K09285	Q94AN4	732	5.6e-76	AP2-like ethylene-responsive transcription factor At1g16060 OS=Arabidopsis thaliana OX=3702 GN=At1g16060 PE=2 SV=1	PF10541//PF00847	Nuclear envelope localisation domain//AP2 domain	GO:0006355	regulation of transcription, DNA-templated	GO:0003700	DNA-binding transcription factor activity	GO:0005667//GO:0016021	transcription regulator complex//integral component of membrane	--	--	UP	1.6498	4.9234e-07	blast,frame:-1 start:1479 end:271
Cluster-7744.0-2R	C2C2-LSD	C2C2->C2C2-LSD	Cluster-7744.0	--	--	--	--	--	--	--	--	--	--	--	--	--	--	--	--	--	--	--	--	--	--	--	--	--	--	--	--	UP	2.4178	7.6252e-16	--
Cluster-7426.0-2R	C2C2-GATA	C2C2->C2C2-GATA	Cluster-7426.0	1219151300	XP_021739141.1	1211	4.6e-130	GATA transcription factor 12-like [Chenopodium quinoa]	XM_021883449.1	XM_021883449	510	0	PREDICTED: Chenopodium quinoa GATA transcription factor 12-like (LOC110705559), mRNA	--	--	--	--	P69781	675	2.5e-69	GATA transcription factor 12 OS=Arabidopsis thaliana OX=3702 GN=GATA12 PE=2 SV=1	PF00320	GATA zinc finger	GO:0006355	regulation of transcription, DNA-templated	GO:0008270//GO:0043565	zinc ion binding//sequence-specific DNA binding	--	--	--	--	UP	1.335	0.00033118	blast,frame:-3 start:1478 end:366
Cluster-6558.34542-0R	RWP-RK	RWP-RK	Cluster-6558.34542	1219165258	XP_021746260.1	138	9.2e-06	uncharacterized protein LOC110712140 isoform X2 [Chenopodium quinoa]	--	--	--	--	--	--	--	--	--	--	--	--	--	--	--	--	--	--	--	--	--	--	--	UP	1.9446	7.6274e-06	blast,frame:-1 start:1269 end:94|blast,frame:-2 start:119 end:3
Cluster-11322.0-1F	FAR1	FAR1	Cluster-11322.0	1226825537	XP_021861944.1	1581	8.4e-173	protein FAR1-RELATED SEQUENCE 8-like [Spinacia oleracea]	--	--	--	--	--	--	--	--	--	Q9SWG3	724	7.5e-75	Protein FAR-RED IMPAIRED RESPONSE 1 OS=Arabidopsis thaliana OX=3702 GN=FAR1 PE=1 SV=1	PF00872//PF08043//PF07962	Transposase, Mutator family//Xin repeat//Replication Fork Protection Component Swi3	GO:0030036//GO:0048478//GO:0006313//GO:0006974	actin cytoskeleton organization//replication fork protection//transposition, DNA-mediated//cellular response to DNA damage stimulus	GO:0004803//GO:0003779//GO:0003677	transposase activity//actin binding//DNA binding	GO:0005634//GO:0030054	nucleus//cell junction	--	--	UP	1.2897	0.0003028	--
Cluster-11039.0-0R	TCP	TCP	Cluster-11039.0	1219049857	XP_021730366.1	592	2.7e-58	transcription factor CYCLOIDEA-like [Chenopodium quinoa]	--	--	--	--	--	--	--	--	--	A1YKT1	217	3.1e-16	Transcription factor TCP18 OS=Arabidopsis thaliana OX=3702 GN=TCP18 PE=1 SV=1	PF11109	Orexigenic neuropeptide Qrfp/P518	--	--	GO:0031854	orexigenic neuropeptide QRFP receptor binding	--	--	--	--	UP	1.2462	0.0019687	blast,frame:-1 start:1373 end:336
Cluster-12417.0-1F	FAR1	FAR1	Cluster-12417.0	731329379	XP_010675563.1	672	1.5e-67	PREDICTED: protein FAR1-RELATED SEQUENCE 4-like [Beta vulgaris subsp. vulgaris]	--	--	--	--	--	--	--	--	--	Q9SWG3	390	2.9e-36	Protein FAR-RED IMPAIRED RESPONSE 1 OS=Arabidopsis thaliana OX=3702 GN=FAR1 PE=1 SV=1	PF00872//PF08731	Transposase, Mutator family//Transcription factor AFT	GO:0036086//GO:0006313	positive regulation of transcription from RNA polymerase II promoter in response to iron ion starvation//transposition, DNA-mediated	GO:0004803//GO:0000981//GO:0003677	transposase activity//DNA-binding transcription factor activity, RNA polymerase II-specific//DNA binding	--	--	--	--	DOWN	-3.1458	0.00013901	blast,frame:2 start:272 end:1198|blast,frame:3 start:1161 end:1757
Cluster-6558.1012-0R	NAC	NAC	Cluster-6558.1012	1226831147	XP_021864744.1	1013	4.1e-107	NAC transcription factor 56 [Spinacia oleracea]	XM_010677306.2	XM_010677306	390	0	PREDICTED: Beta vulgaris subsp. vulgaris NAC transcription factor 56 (LOC104891597), mRNA	--	--	--	--	Q9LD44	793	5.1e-83	NAC transcription factor 56 OS=Arabidopsis thaliana OX=3702 GN=NAC056 PE=2 SV=1	PF10717//PF02365	Occlusion-derived virus envelope protein ODV-E18//No apical meristem (NAM) protein	GO:0006355	regulation of transcription, DNA-templated	GO:0003677	DNA binding	GO:0019031	viral envelope	--	--	UP	3.1893	1.7537e-26	blast,frame:-1 start:1529 end:252
Cluster-6558.11421-0R	C3H	C3H	Cluster-6558.11421	731376963	XP_010667731.1	739	2.3e-75	PREDICTED: zinc finger CCCH domain-containing protein 1 [Beta vulgaris subsp. vulgaris]	XM_018972377.1	XM_018972377	133	2.50158e-61	PREDICTED: Juglans regia zinc finger CCCH domain-containing protein 1-like (LOC108996460), transcript variant X3, mRNA	K13127	RNF113A, CWC24	RING finger protein 113A	http://www.genome.jp/dbget-bin/www_bget?ko:K13127	Q8GX84	662	7.3e-68	Zinc finger CCCH domain-containing protein 1 OS=Arabidopsis thaliana OX=3702 GN=At1g01350 PE=2 SV=2	PF03854//PF00642//PF00097	P-11 zinc finger//Zinc finger C-x8-C-x5-C-x3-H type (and similar)//Zinc finger, C3HC4 type (RING finger)	--	--	GO:0008270//GO:0003723//GO:0046872	zinc ion binding//RNA binding//metal ion binding	--	--	KOG1813	Predicted E3 ubiquitin ligase	UP	3.1455	0.00013955	blast,frame:-3 start:466 end:329|blast,frame:-1 start:1374 end:526
Cluster-6558.7706-1R	C2C2-GATA	C2C2->C2C2-GATA	Cluster-6558.7706	1219109541	XP_021718016.1	843	2e-87	GATA transcription factor 19-like [Chenopodium quinoa]	XM_021858831.1	XM_021858831	338	2.81705e-175	PREDICTED: Chenopodium quinoa GATA transcription factor 19-like (LOC110682492), mRNA	--	--	--	--	Q8LC79	336	4.7e-30	GATA transcription factor 18 OS=Arabidopsis thaliana OX=3702 GN=GATA18 PE=1 SV=2	PF00320	GATA zinc finger	GO:0006355	regulation of transcription, DNA-templated	GO:0043565//GO:0008270	sequence-specific DNA binding//zinc ion binding	--	--	--	--	UP	2.2683	3.1134e-12	blast,frame:-2 start:1558 end:677
Cluster-12248.0-2R	HB-HD-ZIP	HB->HB-HD-ZIP	Cluster-12248.0	731376357	XP_010667539.1	1079	6.8e-115	PREDICTED: homeobox-leucine zipper protein HAT7-like isoform X1 [Beta vulgaris subsp. vulgaris]	XM_019247629.1	XM_019247629	456	0	PREDICTED: Beta vulgaris subsp. vulgaris homeobox-leucine zipper protein HAT7-like (LOC104884563), transcript variant X2, mRNA	K09338	HD-ZIP	homeobox-leucine zipper protein	http://www.genome.jp/dbget-bin/www_bget?ko:K09338	Q00466	467	2.4e-45	Homeobox-leucine zipper protein HAT7 OS=Arabidopsis thaliana OX=3702 GN=HAT7 PE=2 SV=4	PF05920//PF00046//PF02183//PF06005//PF08961//PF06156	Homeobox KN domain//Homeodomain//Homeobox associated leucine zipper//Cell division protein ZapB//Nuclear receptor-binding factor 2, autophagy regulator//Initiation control protein YabA	GO:0006914//GO:0006355//GO:0006260//GO:0090529//GO:0043093	autophagy//regulation of transcription, DNA-templated//DNA replication//cell septum assembly//FtsZ-dependent cytokinesis	GO:0043565//GO:0003677	sequence-specific DNA binding//DNA binding	GO:0005737	cytoplasm	--	--	UP	1.6276	0.0011552	blast,frame:-3 start:1224 end:370
Cluster-7507.0-0R	MYB	MYB->MYB	Cluster-7507.0	1219109506	XP_021717997.1	1174	6.5e-126	transcription factor RAX3-like [Chenopodium quinoa]	XM_021862305.1	XM_021862305	372	0	PREDICTED: Chenopodium quinoa transcription factor RAX3-like (LOC110685784), mRNA	K09422	MYBP	myb proto-oncogene protein, plant	http://www.genome.jp/dbget-bin/www_bget?ko:K09422	Q9M2Y9	656	2.9e-67	Transcription factor RAX3 OS=Arabidopsis thaliana OX=3702 GN=RAX3 PE=2 SV=1	--	--	--	--	--	--	--	--	--	--	UP	2.6796	1.4902e-12	blast,frame:-1 start:1081 end:107
Cluster-11442.0-1R	MYB	MYB->MYB	Cluster-11442.0	731328621	XP_010675151.1	1096	6.9e-117	PREDICTED: transcription repressor MYB6 [Beta vulgaris subsp. vulgaris]	XM_010676849.2	XM_010676849	337	7.46613e-175	PREDICTED: Beta vulgaris subsp. vulgaris transcription repressor MYB6 (LOC104891190), mRNA	K09422	MYBP	myb proto-oncogene protein, plant	http://www.genome.jp/dbget-bin/www_bget?ko:K09422	P81395	673	2.9e-69	Myb-related protein 330 OS=Antirrhinum majus OX=4151 GN=MYB330 PE=2 SV=1	PF09111	SLIDE	GO:0006338	chromatin remodeling	GO:0016818//GO:0003676//GO:0005524	hydrolase activity, acting on acid anhydrides, in phosphorus-containing anhydrides//nucleic acid binding//ATP binding	GO:0005634	nucleus	--	--	UP	1.1284	0.024977	blast,frame:-2 start:1054 end:86
Cluster-6558.34103-2R	C3H	C3H	Cluster-6558.34103	1219104570	XP_021715510.1	187	1.3e-11	zinc finger CCCH domain-containing protein 42-like [Chenopodium quinoa]	XM_021865005.1	XM_021865005	42	5.47673e-11	PREDICTED: Chenopodium quinoa zinc finger CCCH domain-containing protein 42-like (LOC110688277), transcript variant X1, mRNA	K13107	RBMX2, IST3	RNA-binding motif protein, X-linked 2	http://www.genome.jp/dbget-bin/www_bget?ko:K13107	Q9SD61	176	9.5e-12	Zinc finger CCCH domain-containing protein 42 OS=Arabidopsis thaliana OX=3702 GN=At3g47120 PE=2 SV=1	--	--	--	--	--	--	--	--	--	--	UP	1.3236	0.00034387	--
Cluster-5732.0-0F	bHLH	bHLH	Cluster-5732.0	1219101549	XP_021713992.1	836	9.5e-87	uncharacterized protein LOC110682071 isoform X1 [Chenopodium quinoa]	--	--	--	--	--	--	--	--	--	Q9S7Y1	314	1.2e-27	Transcription factor bHLH30 OS=Arabidopsis thaliana OX=3702 GN=BHLH30 PE=1 SV=1	PF02346//PF00010	Chordopoxvirus multifunctional envelope protein A27//Helix-loop-helix DNA-binding domain	GO:0019064	fusion of virus membrane with host plasma membrane	GO:0046983	protein dimerization activity	GO:0019031	viral envelope	--	--	UP	2.4998	9.6092e-12	blast,frame:1 start:1 end:816
Cluster-6558.38685-0F	RWP-RK	RWP-RK	Cluster-6558.38685	1281052001	XP_022968161.1	143	3e-06	protein RKD4 [Cucurbita maxima]	--	--	--	--	--	--	--	--	--	--	--	--	--	PF15202//PF06687	Adipogenin//SUR7/PalI family	GO:0045444	fat cell differentiation	--	--	GO:0005886	plasma membrane	--	--	UP	1.3847	0.00033495	blast,frame:1 start:349 end:1578
Cluster-6558.6944-1F	GARP-G2-like	GARP->GARP-G2-like	Cluster-6558.6944	870868457	KMT19282.1	661	2.7e-66	hypothetical protein BVRB_1g012890 [Beta vulgaris subsp. vulgaris]	XM_022000568.1	XM_022000568	202	1.20374e-99	PREDICTED: Spinacia oleracea probable transcription factor KAN4 (LOC110795551), mRNA	--	--	--	--	Q9FJV5	344	6e-31	Probable transcription factor KAN4 OS=Arabidopsis thaliana OX=3702 GN=KAN4 PE=1 SV=1	--	--	--	--	--	--	--	--	--	--	UP	1.6732	1.4382e-05	blast,frame:2 start:386 end:1477
Cluster-9141.0-0F	GRAS	GRAS	Cluster-9141.0	1226813094	XP_021855794.1	1292	1.7e-139	scarecrow-like protein 23 [Spinacia oleracea]	--	--	--	--	--	--	--	--	--	Q9FHZ1	909	1.7e-96	Scarecrow-like protein 23 OS=Arabidopsis thaliana OX=3702 GN=SCL23 PE=1 SV=1	PF02538	Hydantoinase B/oxoprolinase	--	--	GO:0003824	catalytic activity	--	--	--	--	UP	3.0296	5.405e-11	blast,frame:1 start:115 end:1332
Cluster-12383.0-0F	FAR1	FAR1	Cluster-12383.0	1226834172	XP_021866002.1	550	1.2e-53	protein FAR1-RELATED SEQUENCE 5-like [Spinacia oleracea]	--	--	--	--	--	--	--	--	--	Q9SWG3	136	4.7e-07	Protein FAR-RED IMPAIRED RESPONSE 1 OS=Arabidopsis thaliana OX=3702 GN=FAR1 PE=1 SV=1	--	--	--	--	--	--	--	--	--	--	DOWN	-5.699	0.00015227	blast,frame:2 start:830 end:1000
Cluster-6558.41785-2F	B3	B3->B3	Cluster-6558.41785	902183992	KNA10220.1	1146	2.1e-122	hypothetical protein SOVF_146300, partial [Spinacia oleracea]	XM_021991542.1	XM_021991542	161	1.00444e-76	PREDICTED: Spinacia oleracea B3 domain-containing protein Os01g0234100-like (LOC110786957), transcript variant X2, mRNA	--	--	--	--	Q0JP99	645	1e-65	B3 domain-containing protein Os01g0234100 OS=Oryza sativa subsp. japonica OX=39947 GN=Os01g0234100 PE=2 SV=1	PF02362//PF01153//PF03893	B3 DNA binding domain//Glypican//Lipase 3 N-terminal region	GO:0016042//GO:0009966	lipid catabolic process//regulation of signal transduction	GO:0003677	DNA binding	GO:0046658//GO:0062023	anchored component of plasma membrane//collagen-containing extracellular matrix	--	--	UP	3.8002	6.1418e-26	blast,frame:3 start:342 end:1790
Cluster-6558.3514-1F	C2H2	C2H2	Cluster-6558.3514	--	--	--	--	--	--	--	--	--	--	--	--	--	--	--	--	--	--	PF00096	Zinc finger, C2H2 type	--	--	GO:0003676	nucleic acid binding	--	--	--	--	UP	4.712	3.4643e-27	--
Cluster-15045.0-2F	HB-WOX	HB->HB-WOX	Cluster-15045.0	1226777868	XP_021845007.1	576	1.7e-56	WUSCHEL-related homeobox 1-like [Spinacia oleracea]	XM_019411455.1	XM_019411455	99	1.90164e-42	PREDICTED: Nicotiana attenuata WUSCHEL-related homeobox 1 (LOC109244374), mRNA	--	--	--	--	Q6X7K0	298	1.1e-25	WUSCHEL-related homeobox 1 OS=Arabidopsis thaliana OX=3702 GN=WOX1 PE=2 SV=2	PF00046	Homeodomain	--	--	GO:0003677	DNA binding	--	--	--	--	UP	1.6905	0.0007111	blast,frame:3 start:81 end:1292
Cluster-9537.0-1R	C3H	C3H	Cluster-9537.0	870867734	KMT18603.1	808	1.6e-83	hypothetical protein BVRB_2g027340 [Beta vulgaris subsp. vulgaris]	XM_021895408.1	XM_021895408	263	9.80438e-134	PREDICTED: Chenopodium quinoa zinc finger CCCH domain-containing protein 14-like (LOC110716776), mRNA	K18753	ZFP36L	butyrate response factor 1	http://www.genome.jp/dbget-bin/www_bget?ko:K18753	Q9C9F5	428	7.2e-41	Zinc finger CCCH domain-containing protein 15 OS=Arabidopsis thaliana OX=3702 GN=At1g68200 PE=2 SV=1	PF00642//PF12581//PF06005	Zinc finger C-x8-C-x5-C-x3-H type (and similar)//Protein of unknown function (DUF3756)//Cell division protein ZapB	GO:0043093//GO:0090529//GO:0006508//GO:0006144	FtsZ-dependent cytokinesis//cell septum assembly//proteolysis//purine nucleobase metabolic process	GO:0004252//GO:0003968//GO:0004197//GO:0046872//GO:0070008//GO:0016817	serine-type endopeptidase activity//RNA-directed 5'-3' RNA polymerase activity//cysteine-type endopeptidase activity//metal ion binding//serine-type exopeptidase activity//hydrolase activity, acting on acid anhydrides	GO:0031379//GO:0005737	RNA-directed RNA polymerase complex//cytoplasm	KOG1677	CCCH-type Zn-finger protein	UP	1.2696	0.012703	blast,frame:-2 start:1116 end:211
Cluster-6558.3436-0F	FAR1	FAR1	Cluster-6558.3436	1219063528	XP_021757667.1	1774	4.7e-195	protein FAR1-RELATED SEQUENCE 11-like isoform X2 [Chenopodium quinoa]	XM_021918549.1	XM_021918549	240	1.78874e-120	PREDICTED: Chenopodium quinoa protein FAR1-RELATED SEQUENCE 11-like (LOC110738173), mRNA	--	--	--	--	Q9SY66	968	5.1e-103	Protein FAR1-RELATED SEQUENCE 11 OS=Arabidopsis thaliana OX=3702 GN=FRS11 PE=1 SV=1	PF04434//PF00872	SWIM zinc finger//Transposase, Mutator family	GO:0006313	transposition, DNA-mediated	GO:0003677//GO:0004803//GO:0008270	DNA binding//transposase activity//zinc ion binding	--	--	--	--	UP	6.2767	4.188e-31	blast,frame:2 start:2102 end:2842
Cluster-6558.24-0F	C2H2	C2H2	Cluster-6558.24	1219050701	XP_021734842.1	978	2.2e-103	zinc finger protein WIP6-like [Chenopodium quinoa]	XM_021879150.1	XM_021879150	330	3.71907e-171	PREDICTED: Chenopodium quinoa zinc finger protein WIP6-like (LOC110701508), mRNA	--	--	--	--	Q9SVY1	837	1.8e-88	Zinc finger protein WIP2 OS=Arabidopsis thaliana OX=3702 GN=WIP2 PE=1 SV=1	PF00096	Zinc finger, C2H2 type	--	--	GO:0003676	nucleic acid binding	--	--	--	--	UP	1.7314	0.00046521	blast,frame:1 start:1 end:561
Cluster-8161.1-0F	B3	B3->B3	Cluster-8161.1	1226800813	XP_021849698.1	600	3.1e-59	B3 domain-containing protein Os03g0619600-like [Spinacia oleracea]	--	--	--	--	--	--	--	--	--	Q2R9D2	214	6.7e-16	B3 domain-containing protein Os11g0197600 OS=Oryza sativa subsp. japonica OX=39947 GN=Os11g0197600 PE=2 SV=1	PF02362//PF08283	B3 DNA binding domain//Geminivirus rep protein central domain	GO:0006308	DNA catabolic process	GO:0016888//GO:0003677	endodeoxyribonuclease activity, producing 5'-phosphomonoesters//DNA binding	--	--	--	--	UP	1.703	0.00042259	blast,frame:2 start:1130 end:1393|blast,frame:1 start:1 end:1182
Cluster-6558.4158-0F	WRKY	WRKY	Cluster-6558.4158	1108885404	XP_010670218.2	1453	5.8e-158	PREDICTED: probable WRKY transcription factor 4 [Beta vulgaris subsp. vulgaris]	XM_021915175.1	XM_021915175	272	2.15645e-138	PREDICTED: Chenopodium quinoa probable WRKY transcription factor 4 (LOC110735049), mRNA	--	--	--	--	Q93WU7	732	8.9e-76	Probable WRKY transcription factor 58 OS=Arabidopsis thaliana OX=3702 GN=WRKY58 PE=2 SV=2	PF03106//PF06524//PF09285	WRKY DNA -binding domain//NOA36 protein//Elongation factor P, C-terminal	GO:0043043//GO:0006355	peptide biosynthetic process//regulation of transcription, DNA-templated	GO:0008270//GO:0003700//GO:0043565	zinc ion binding//DNA-binding transcription factor activity//sequence-specific DNA binding	GO:0005737//GO:0005667//GO:0005634	cytoplasm//transcription regulator complex//nucleus	--	--	UP	3.659	7.2059e-26	blast,frame:1 start:1 end:1539
Cluster-8407.0-0R	NAC	NAC	Cluster-8407.0	1052230956	AOC59201.1	1698	1.2e-186	NAC transcription factor 17 [Haloxylon ammodendron]	KU685534.1	KU685534	1005	0	Haloxylon ammodendron NAC transcription factor 17 mRNA, complete cds	--	--	--	--	Q9FLR3	644	7.6e-66	NAC domain-containing protein 79 OS=Arabidopsis thaliana OX=3702 GN=NAC079 PE=2 SV=1	PF02365	No apical meristem (NAM) protein	GO:0006355	regulation of transcription, DNA-templated	GO:0003677	DNA binding	--	--	--	--	UP	3.9067	4.9816e-09	blast,frame:-1 start:1180 end:155
Cluster-6558.1656-2R	B3	B3->B3	Cluster-6558.1656	--	--	--	--	--	--	--	--	--	--	--	--	--	--	--	--	--	--	PF02362	B3 DNA binding domain	--	--	GO:0003677	DNA binding	--	--	--	--	UP	3.6436	1.412e-05	--
Cluster-6558.180-1R	FAR1	FAR1	Cluster-6558.180	731371053	XP_010665920.1	387	1.4e-34	PREDICTED: protein FAR1-RELATED SEQUENCE 5-like [Beta vulgaris subsp. vulgaris]	--	--	--	--	--	--	--	--	--	Q84TH9	170	7.8e-11	Protein NLP7 OS=Arabidopsis thaliana OX=3702 GN=NLP7 PE=1 SV=2	PF00564//PF02843	PB1 domain//Phosphoribosylglycinamide synthetase, C domain	GO:0009113//GO:0006144	purine nucleobase biosynthetic process//purine nucleobase metabolic process	GO:0004637//GO:0005515	phosphoribosylamine-glycine ligase activity//protein binding	--	--	--	--	UP	2.7826	4.8933e-06	blast,frame:-2 start:1406 end:651
Cluster-6558.27556-0R	HSF	HSF	Cluster-6558.27556	731345343	XP_010683874.1	403	1.4e-36	PREDICTED: heat stress transcription factor A-3 isoform X1 [Beta vulgaris subsp. vulgaris]	XM_021887628.1	XM_021887628	87	6.2017e-36	PREDICTED: Chenopodium quinoa heat stress transcription factor A-3-like (LOC110709409), transcript variant X2, mRNA	K09419	HSFF	heat shock transcription factor, other eukaryote	http://www.genome.jp/dbget-bin/www_bget?ko:K09419	Q8GYY1	336	3.1e-30	Heat stress transcription factor A-3 OS=Arabidopsis thaliana OX=3702 GN=HSFA3 PE=1 SV=2	PF00447	HSF-type DNA-binding	GO:0006355	regulation of transcription, DNA-templated	GO:0043565//GO:0003700	sequence-specific DNA binding//DNA-binding transcription factor activity	GO:0042025//GO:0005667	host cell nucleus//transcription regulator complex	--	--	UP	4.9285	1.4191e-13	blast,frame:-1 start:1014 end:1
Cluster-6558.5477-0F	MADS-MIKC	MADS->MADS-MIKC	Cluster-6558.5477	731313059	XP_010677653.1	822	3.2e-85	PREDICTED: floral homeotic protein PMADS 2 isoform X1 [Beta vulgaris subsp. vulgaris]	XM_010679359.1	XM_010679359	281	7.73152e-144	PREDICTED: Beta vulgaris subsp. vulgaris floral homeotic protein PMADS 2 (LOC104893251), mRNA	K09264	K09264	MADS-box transcription factor, plant	http://www.genome.jp/dbget-bin/www_bget?ko:K09264	Q07474	669	6.6e-69	Floral homeotic protein PMADS 2 OS=Petunia hybrida OX=4102 GN=PMADS2 PE=2 SV=1	PF00319//PF00170//PF02183//PF01486	SRF-type transcription factor (DNA-binding and dimerisation domain)//bZIP transcription factor//Homeobox associated leucine zipper//K-box region	GO:0006355	regulation of transcription, DNA-templated	GO:0043565//GO:0003700//GO:0003677//GO:0046983	sequence-specific DNA binding//DNA-binding transcription factor activity//DNA binding//protein dimerization activity	GO:0005634//GO:0005667	nucleus//transcription regulator complex	--	--	UP	1.7887	0.00057623	blast,frame:1 start:1 end:687
Cluster-14461.0-2R	MYB-related	MYB->MYB-related	Cluster-14461.0	731358682	XP_010690880.1	392	1.7e-35	PREDICTED: protein RADIALIS-like 2 [Beta vulgaris subsp. vulgaris]	XM_021875895.1	XM_021875895	177	3.59807e-86	PREDICTED: Chenopodium quinoa protein RADIALIS-like 2 (LOC110698458), mRNA	--	--	--	--	Q58FS3	313	9.1e-28	Transcription factor RADIALIS OS=Antirrhinum majus OX=4151 GN=RAD PE=1 SV=1	--	--	--	--	--	--	--	--	--	--	UP	1.9972	0.041047	blast,frame:-3 start:506 end:267
Cluster-6558.5255-1R	OFP	OFP	Cluster-6558.5255	731336065	XP_010679055.1	527	5e-51	PREDICTED: transcription repressor OFP12-like [Beta vulgaris subsp. vulgaris]	XM_021907035.1	XM_021907035	55	3.28046e-18	PREDICTED: Chenopodium quinoa transcription repressor OFP12-like (LOC110727480), mRNA	--	--	--	--	F4I8R6	200	1.6e-14	Transcription repressor OFP12 OS=Arabidopsis thaliana OX=3702 GN=OFP12 PE=1 SV=1	--	--	--	--	--	--	--	--	--	--	UP	2.2949	7.8461e-05	blast,frame:-2 start:853 end:47
Cluster-6558.41532-2R	HSF	HSF	Cluster-6558.41532	747073818	XP_011083880.1	419	8.2e-39	heat stress transcription factor B-4-like [Sesamum indicum]	LR031577.1	LR031577	104	8.94561e-46	Brassica rapa genome, scaffold: A10	K09419	HSFF	heat shock transcription factor, other eukaryote	http://www.genome.jp/dbget-bin/www_bget?ko:K09419	Q7XHZ0	344	1.6e-31	Heat stress transcription factor B-4b OS=Oryza sativa subsp. japonica OX=39947 GN=HSFB4B PE=1 SV=1	PF00447	HSF-type DNA-binding	GO:0006355	regulation of transcription, DNA-templated	GO:0003700//GO:0043565	DNA-binding transcription factor activity//sequence-specific DNA binding	GO:0005667//GO:0042025	transcription regulator complex//host cell nucleus	--	--	UP	1.9559	0.024321	blast,frame:-3 start:255 end:1
Cluster-13816.0-0F	MYB	MYB->MYB	Cluster-13816.0	1219103588	XP_021715026.1	829	4.6e-86	transcription repressor MYB6-like [Chenopodium quinoa]	XM_019247368.1	XM_019247368	268	1.23231e-136	PREDICTED: Beta vulgaris subsp. vulgaris transcription factor MYB23 (LOC104883425), mRNA	K09422	MYBP	myb proto-oncogene protein, plant	http://www.genome.jp/dbget-bin/www_bget?ko:K09422	A0A4D6Q411	600	6.3e-61	Transcription factor MYB1 OS=Crocosmia x crocosmiiflora OX=1053288 GN=MYB1 PE=2 SV=1	--	--	--	--	--	--	--	--	--	--	UP	2.8962	0.0089746	blast,frame:1 start:100 end:852
Cluster-6558.1467-1R	AP2/ERF-ERF	AP2/ERF->AP2/ERF-ERF	Cluster-6558.1467	731343758	XP_010683050.1	590	3.2e-58	PREDICTED: ethylene-responsive transcription factor ERF021 [Beta vulgaris subsp. vulgaris]	XM_021885487.1	XM_021885487	243	1.33144e-122	PREDICTED: Chenopodium quinoa ethylene-responsive transcription factor ERF021-like (LOC110707473), mRNA	--	--	--	--	Q9LQ28	364	2e-33	Ethylene-responsive transcription factor ERF022 OS=Arabidopsis thaliana OX=3702 GN=ERF022 PE=2 SV=1	PF00847	AP2 domain	GO:0006355	regulation of transcription, DNA-templated	GO:0003700	DNA-binding transcription factor activity	GO:0005667	transcription regulator complex	--	--	UP	4.3608	1.3054e-08	blast,frame:-2 start:1154 end:549
Cluster-5757.0-2F	MYB	MYB->MYB	Cluster-5757.0	1219057877	XP_021754682.1	811	5.5e-84	transcription factor RAX3-like [Chenopodium quinoa]	XM_010689207.2	XM_010689207	339	4.1219e-176	PREDICTED: Beta vulgaris subsp. vulgaris transcription factor RAX3-like (LOC104901614), mRNA	K09422	MYBP	myb proto-oncogene protein, plant	http://www.genome.jp/dbget-bin/www_bget?ko:K09422	Q9FKL2	605	1.6e-61	Transcription factor MYB36 OS=Arabidopsis thaliana OX=3702 GN=MYB36 PE=1 SV=1	PF09111	SLIDE	GO:0006338	chromatin remodeling	GO:0016818//GO:0005524//GO:0003676	hydrolase activity, acting on acid anhydrides, in phosphorus-containing anhydrides//ATP binding//nucleic acid binding	GO:0005634	nucleus	--	--	UP	2.4404	0.020235	--
Cluster-6558.39959-0R	C2C2-LSD	C2C2->C2C2-LSD	Cluster-6558.39959	731350756	XP_010686668.1	162	2.5e-08	PREDICTED: protein LOL2 [Beta vulgaris subsp. vulgaris]	--	--	--	--	--	--	--	--	--	O65426	133	2.2e-06	Protein LOL2 OS=Arabidopsis thaliana OX=3702 GN=LOL2 PE=1 SV=1	PF06113	Brain and reproductive organ-expressed protein (BRE)	--	--	--	--	GO:0070531//GO:0070552	BRCA1-A complex//BRISC complex	--	--	UP	6.0634	8.551e-15	blast,frame:-1 start:1890 end:1729
Cluster-6558.8062-1R	MYB	MYB->MYB	Cluster-6558.8062	1219085192	XP_021768784.1	1266	2e-136	transcription factor MYB14-like [Chenopodium quinoa]	XM_021980492.1	XM_021980492	406	0	PREDICTED: Spinacia oleracea transcription factor MYB11 (LOC110775895), mRNA	K09422	MYBP	myb proto-oncogene protein, plant	http://www.genome.jp/dbget-bin/www_bget?ko:K09422	O22264	660	1.4e-67	Transcription factor MYB12 OS=Arabidopsis thaliana OX=3702 GN=MYB12 PE=1 SV=1	--	--	--	--	--	--	--	--	--	--	UP	3.7612	3.9459e-07	blast,frame:-2 start:1517 end:321
Cluster-6558.29823-1F	RWP-RK	RWP-RK	Cluster-6558.29823	--	--	--	--	--	--	--	--	--	--	--	--	--	--	--	--	--	--	--	--	--	--	--	--	--	--	--	--	UP	2.1695	0.011181	--
Cluster-6558.3407-0F	FAR1	FAR1	Cluster-6558.3407	1366004759	XP_024200504.1	1538	1.3e-167	protein FAR1-RELATED SEQUENCE 5-like [Rosa chinensis]	XM_021874093.1	XM_021874093	46	1.50896e-12	PREDICTED: Chenopodium quinoa protein FAR1-RELATED SEQUENCE 5-like (LOC110696743), mRNA	--	--	--	--	Q9SZL8	952	4.4e-101	Protein FAR1-RELATED SEQUENCE 5 OS=Arabidopsis thaliana OX=3702 GN=FRS5 PE=1 SV=1	PF04434//PF00872	SWIM zinc finger//Transposase, Mutator family	GO:0006313	transposition, DNA-mediated	GO:0004803//GO:0008270//GO:0003677	transposase activity//zinc ion binding//DNA binding	--	--	--	--	UP	6.1103	5.9132e-15	blast,frame:1 start:1207 end:3426
Cluster-6558.8316-2F	B3	B3->B3	Cluster-6558.8316	1226811585	XP_021855066.1	289	1.9e-23	B3 domain-containing protein REM20-like isoform X1 [Spinacia oleracea]	--	--	--	--	--	--	--	--	--	Q9FGD2	164	2.2e-10	Putative B3 domain-containing protein At5g66980 OS=Arabidopsis thaliana OX=3702 GN=At5g66980 PE=1 SV=1	PF02362	B3 DNA binding domain	--	--	GO:0003677	DNA binding	--	--	--	--	UP	3.046	1.2921e-05	blast,frame:3 start:3 end:497
Cluster-1739.0-0F	CSD	CSD	Cluster-1739.0	1279028771	XP_022873619.1	211	1.5e-14	glycine-rich protein 2-like [Olea europaea var. sylvestris]	--	--	--	--	--	--	--	--	--	Q06066	405	1.8e-38	Y-box-binding protein 1 OS=Gallus gallus OX=9031 GN=YBX1 PE=2 SV=1	PF00313	'Cold-shock' DNA-binding domain	--	--	GO:0003676	nucleic acid binding	--	--	KOG3070	Predicted RNA-binding protein containing PIN domain and invovled in translation or RNA processing	UP	4.8913	0.0051908	blast,frame:1 start:79 end:585
Cluster-10410.0-0R	zf-HD	zf-HD	Cluster-10410.0	1028972502	XP_016729701.1	337	3.5e-29	PREDICTED: mini zinc finger protein 2-like isoform X2 [Gossypium hirsutum]	--	--	--	--	--	--	--	--	--	Q9LJW5	288	6.4e-25	Mini zinc finger protein 2 OS=Arabidopsis thaliana OX=3702 GN=MIF2 PE=1 SV=1	--	--	--	--	--	--	--	--	--	--	UP	4.9696	3.1067e-19	--
Cluster-1167.0-1R	MYB-related	MYB->MYB-related	Cluster-1167.0	1219104836	XP_021715647.1	636	3.7e-63	uncharacterized protein LOC110683552 [Chenopodium quinoa]	--	--	--	--	--	--	--	--	--	--	--	--	--	PF06422	CDR ABC transporter	GO:0055085//GO:0006810	transmembrane transport//transport	GO:0042626//GO:0005524	ATPase-coupled transmembrane transporter activity//ATP binding	GO:0016021	integral component of membrane	--	--	UP	8.0714	2.4954e-10	blast,frame:-2 start:2833 end:647
Cluster-332.0-2F	HMG	HMG	Cluster-332.0	855308873	XP_012896664.1	161	1.9e-08	uncharacterized protein [Blastocystis hominis]	--	--	--	--	--	--	--	--	--	Q06943	251	2.6e-20	High mobility group protein Z OS=Drosophila melanogaster OX=7227 GN=HmgZ PE=1 SV=1	--	--	--	--	--	--	--	--	--	--	UP	6.5652	1.5606e-06	blast,frame:3 start:93 end:458
Cluster-6558.3123-2R	C3H	C3H	Cluster-6558.3123	731371818	XP_010666160.1	215	4.5e-15	PREDICTED: CDPK-related kinase 4 isoform X1 [Beta vulgaris subsp. vulgaris]	XM_021907387.1	XM_021907387	102	1.42577e-44	PREDICTED: Chenopodium quinoa zinc finger CCCH domain-containing protein 32-like (LOC110727821), mRNA	--	--	--	--	Q9SCS2	187	3e-13	CDPK-related kinase 5 OS=Arabidopsis thaliana OX=3702 GN=CRK5 PE=2 SV=1	--	--	--	--	--	--	--	--	--	--	UP	5.061	0.0034592	blast,frame:-3 start:340 end:38
Cluster-6558.35026-0R	MADS-M-type	MADS->MADS-M-type	Cluster-6558.35026	1219152900	XP_021739930.1	247	2.7e-18	agamous-like MADS-box protein AGL30 [Chenopodium quinoa]	XM_021987297.1	XM_021987297	116	7.55603e-52	PREDICTED: Spinacia oleracea agamous-like MADS-box protein AGL30 (LOC110782996), mRNA	--	--	--	--	Q1PFA4	175	2.3e-11	Agamous-like MADS-box protein AGL30 OS=Arabidopsis thaliana OX=3702 GN=AGL30 PE=1 SV=1	PF00319	SRF-type transcription factor (DNA-binding and dimerisation domain)	--	--	GO:0003677//GO:0046983	DNA binding//protein dimerization activity	--	--	--	--	UP	4.53	1.5136e-07	--
Cluster-6558.40484-2R	SRS	SRS	Cluster-6558.40484	--	--	--	--	--	--	--	--	--	--	--	--	--	--	--	--	--	--	--	--	--	--	--	--	--	--	--	--	UP	3.5998	0.014791	--
Cluster-6558.40563-0F	zf-HD	zf-HD	Cluster-6558.40563	870868969	KMT19755.1	412	1.6e-37	hypothetical protein BVRB_1g008110 [Beta vulgaris subsp. vulgaris]	XM_010677188.2	XM_010677188	125	5.84427e-57	PREDICTED: Beta vulgaris subsp. vulgaris zinc-finger homeodomain protein 1-like (LOC104891487), mRNA	--	--	--	--	A2Z259	304	2e-26	Zinc-finger homeodomain protein 1 OS=Oryza sativa subsp. indica OX=39946 GN=ZHD1 PE=3 SV=1	--	--	--	--	--	--	--	--	--	--	UP	7.8859	7.4737e-10	blast,frame:2 start:977 end:1282
Cluster-6558.40609-2F	HB-other	HB->HB-other	Cluster-6558.40609	--	--	--	--	--	--	--	--	--	--	--	--	--	--	--	--	--	--	--	--	--	--	--	--	--	--	--	--	UP	4.8366	0.0013914	--
Cluster-595.0-1F	CSD	CSD	Cluster-595.0	1279028771	XP_022873619.1	207	1.1e-13	glycine-rich protein 2-like [Olea europaea var. sylvestris]	--	--	--	--	--	--	--	--	--	P41824	413	5.3e-39	Y-box factor homolog OS=Aplysia californica OX=6500 PE=2 SV=1	PF00313	'Cold-shock' DNA-binding domain	--	--	GO:0003676	nucleic acid binding	--	--	KOG3070	Predicted RNA-binding protein containing PIN domain and invovled in translation or RNA processing	UP	7.3433	1.9239e-08	blast,frame:2 start:344 end:1222
Cluster-6558.7562-2R	NF-YC	NF-Y->NF-YC	Cluster-6558.7562	1137187770	OMO62028.1	254	1.7e-19	Transcription factor CBF/NF-Y/archaeal histone [Corchorus olitorius]	--	--	--	--	--	--	--	--	--	Q14919	169	4.6e-11	Dr1-associated corepressor OS=Homo sapiens OX=9606 GN=DRAP1 PE=1 SV=3	PF00125	Core histone H2A/H2B/H3/H4	--	--	GO:0003677	DNA binding	GO:0000786	nucleosome	KOG1659	Class 2 transcription repressor NC2, alpha subunit (DRAP1)	UP	4.2521	0.012151	--
Cluster-6558.1612-2R	FAR1	FAR1	Cluster-6558.1612	1219063524	XP_021757665.1	1149	3.8e-123	protein FAR1-RELATED SEQUENCE 11-like isoform X1 [Chenopodium quinoa]	XR_002529575.1	XR_002529575	492	0	PREDICTED: Spinacia oleracea uncharacterized LOC110774751 (LOC110774751), transcript variant X2, ncRNA	--	--	--	--	Q9SY66	549	5.5e-55	Protein FAR1-RELATED SEQUENCE 11 OS=Arabidopsis thaliana OX=3702 GN=FRS11 PE=1 SV=1	--	--	--	--	--	--	--	--	--	--	UP	5.8557	6.0248e-05	blast,frame:-3 start:837 end:1
Cluster-6558.3297-2R	Others	Others	Cluster-6558.3297	388496562	AFK36347.1	245	4.1e-18	unknown [Lotus japonicus]	AK407014.1	AK407014	167	2.94398e-80	Cryptomeria japonica mRNA, clone: CFFL006_G22, expressed in female strobili	--	--	--	--	P53777	365	1.9e-33	Muscle LIM protein 1 OS=Drosophila melanogaster OX=7227 GN=Mlp60A PE=2 SV=1	PF00191	Annexin	--	--	GO:0005544//GO:0005509	calcium-dependent phospholipid binding//calcium ion binding	--	--	KOG1700	Regulatory protein MLP and related LIM proteins	UP	8.749	3.7065e-12	blast,frame:-3 start:1357 end:1034
Cluster-1716.0-0F	bZIP	bZIP	Cluster-1716.0	326523605	BAJ92973.1	218	2.6e-15	predicted protein [Hordeum vulgare subsp. vulgare]	--	--	--	--	--	--	--	--	--	Q9GPH3	222	3.4e-17	Activating transcription factor of chaperone OS=Bombyx mori OX=7091 GN=ATFC PE=2 SV=1	PF03131//PF07716//PF00170	bZIP Maf transcription factor//Basic region leucine zipper//bZIP transcription factor	GO:0006355	regulation of transcription, DNA-templated	GO:0003677//GO:0003700	DNA binding//DNA-binding transcription factor activity	GO:0005667//GO:0005634	transcription regulator complex//nucleus	--	--	UP	5.2596	0.0011985	blast,frame:1 start:1 end:339
Cluster-363.0-2F	FAR1	FAR1	Cluster-363.0	731356505	XP_010689709.1	689	7.5e-70	PREDICTED: protein FAR-RED IMPAIRED RESPONSE 1-like [Beta vulgaris subsp. vulgaris]	--	--	--	--	--	--	--	--	--	Q9SWG3	249	3e-20	Protein FAR-RED IMPAIRED RESPONSE 1 OS=Arabidopsis thaliana OX=3702 GN=FAR1 PE=1 SV=1	--	--	--	--	--	--	--	--	--	--	UP	5.3224	0.00090114	--
Cluster-6946.0-0R	MYB	MYB->MYB	Cluster-6946.0	1226793954	XP_021846262.1	1195	2.2e-128	transcription factor MYB41 [Spinacia oleracea]	XM_021896900.1	XM_021896900	427	0	PREDICTED: Chenopodium quinoa transcription factor MYB39-like (LOC110718102), mRNA	K09422	MYBP	myb proto-oncogene protein, plant	http://www.genome.jp/dbget-bin/www_bget?ko:K09422	Q9S9Z2	667	1.4e-68	Transcription factor MYB93 OS=Arabidopsis thaliana OX=3702 GN=MYB93 PE=1 SV=1	--	--	--	--	--	--	--	--	--	--	UP	1.8789	0.047466	blast,frame:-1 start:1009 end:2

## Sheet: LB vs. HB
Table S5 Transcription factors response to drought stress in Haloxylon persicum
tf_id	Subfamily	tf_Family	gene_id	NR GI	NR ID	NR Score	NR Evalue	NR Description	NT GI	NT ID	NT Score	NT Evalue	NT Description	KO ID	KO Name	KO Description	Http Link	Swissprot ID	Swissprot Score	Swissprot Evalue	Swissprot Description	PFAM ID	PFAM description	Gene Ontology Biological Pathway	BP Description	Gene Ontology Molecular Function	MF Description	Gene Ontology Cellular Component	CC Description	KOG ID	KOG Description	UP_DOWN_REGULATION(LBvsHB)	log2FC(LBvsHB)	q value(LBvsHB)	CDS_flag
Cluster-1004.2-2F	FAR1	FAR1	Cluster-1004.2	731314312	XP_010685186.1	322	3e-27	PREDICTED: protein FAR1-RELATED SEQUENCE 6-like [Beta vulgaris subsp. vulgaris]	--	--	--	--	--	--	--	--	--	--	--	--	--	--	--	--	--	--	--	--	--	--	--	UP	2.4934	0.036807	blast,frame:3 start:162 end:911
Cluster-10201.0-2F	bZIP	bZIP	Cluster-10201.0	1219117599	XP_021722055.1	1913	2.2e-211	transcription factor TGA9-like isoform X2 [Chenopodium quinoa]	XM_022002960.1	XM_022002960	753	0	PREDICTED: Spinacia oleracea transcription factor TGA9 (LOC110797839), transcript variant X2, mRNA	K14431	TGA	transcription factor TGA	http://www.genome.jp/dbget-bin/www_bget?ko:K14431	Q93XM6	1323	2.1e-144	Transcription factor TGA9 OS=Arabidopsis thaliana OX=3702 GN=TGA9 PE=1 SV=1	PF14144//PF00170//PF07716	Seed dormancy control//bZIP transcription factor//Basic region leucine zipper	GO:0006351//GO:0006355	transcription, DNA-templated//regulation of transcription, DNA-templated	GO:0043565//GO:0003700	sequence-specific DNA binding//DNA-binding transcription factor activity	GO:0005667	transcription regulator complex	--	--	DOWN	-1.0107	0.015039	blast,frame:3 start:231 end:1844
Cluster-10506.0-1R	C2C2-YABBY	C2C2->C2C2-YABBY	Cluster-10506.0	1219052312	XP_021742940.1	619	9.8e-62	axial regulator YABBY 4-like [Chenopodium quinoa]	XM_021871723.1	XM_021871723	291	1.91292e-149	PREDICTED: Chenopodium quinoa axial regulator YABBY 4-like (LOC110694542), mRNA	--	--	--	--	Q9LDT3	402	5.4e-38	Axial regulator YABBY 4 OS=Arabidopsis thaliana OX=3702 GN=YAB4 PE=1 SV=2	PF04690	YABBY protein	GO:0007275	multicellular organism development	--	--	--	--	--	--	UP	1.9142	0.049993	blast,frame:-2 start:746 end:150
Cluster-1097.0-1F	C2H2	C2H2	Cluster-1097.0	--	--	--	--	--	--	--	--	--	--	--	--	--	--	--	--	--	--	PF00096	Zinc finger, C2H2 type	--	--	GO:0003676	nucleic acid binding	--	--	--	--	UP	6.5952	1.119e-05	--
Cluster-11545.0-2F	Others	Others	Cluster-11545.0	1219160316	XP_021743701.1	575	3.6e-56	two-component response regulator ORR9-like isoform X1 [Chenopodium quinoa]	XM_021888010.1	XM_021888010	245	2.11559e-123	PREDICTED: Chenopodium quinoa two-component response regulator ORR9-like (LOC110709768), transcript variant X2, mRNA	K14492	ARR-A	two-component response regulator ARR-A family	http://www.genome.jp/dbget-bin/www_bget?ko:K14492	Q2RAP3	191	4.6e-13	Two-component response regulator ORR9 OS=Oryza sativa subsp. japonica OX=39947 GN=RR9 PE=2 SV=2	PF00072//PF12297	Response regulator receiver domain//Ellis van Creveld protein 2 like protein	GO:0007224//GO:0000160	smoothened signaling pathway//phosphorelay signal transduction system	--	--	--	--	--	--	DOWN	-2.2863	9.1757e-16	blast,frame:3 start:363 end:905
Cluster-12500.0-2F	bHLH	bHLH	Cluster-12500.0	902166718	KNA07266.1	1613	1.5e-176	hypothetical protein SOVF_172560 [Spinacia oleracea]	XM_010680046.2	XM_010680046	547	0	PREDICTED: Beta vulgaris subsp. vulgaris transcription factor ICE1 (LOC104893910), mRNA	--	--	--	--	Q9LSE2	850	1.7e-89	Transcription factor ICE1 OS=Arabidopsis thaliana OX=3702 GN=SCRM PE=1 SV=1	PF00010	Helix-loop-helix DNA-binding domain	--	--	GO:0046983	protein dimerization activity	--	--	--	--	DOWN	-1.5723	6.3593e-15	blast,frame:3 start:255 end:2030
Cluster-13775.1-2F	B3	B3->B3	Cluster-13775.1	1219074786	XP_021763430.1	829	4.3e-86	B3 domain-containing transcription factor ABI3-like [Chenopodium quinoa]	XM_010686685.1	XM_010686685	321	3.92161e-166	PREDICTED: Beta vulgaris subsp. vulgaris B3 domain-containing transcription factor ABI3 (LOC104899487), transcript variant X2, mRNA	--	--	--	--	Q01593	619	3.6e-63	B3 domain-containing transcription factor ABI3 OS=Arabidopsis thaliana OX=3702 GN=ABI3 PE=1 SV=1	PF02362//PF12937	B3 DNA binding domain//F-box-like	--	--	GO:0005515//GO:0003677	protein binding//DNA binding	--	--	--	--	DOWN	-2.6633	0.036094	blast,frame:3 start:3 end:605
Cluster-3181.10666-1R	HB-HD-ZIP	HB->HB-HD-ZIP	Cluster-3181.10666	902228268	KNA21035.1	427	3.5e-39	hypothetical protein SOVF_046880 [Spinacia oleracea]	XM_010678605.2	XM_010678605	168	8.99434e-81	PREDICTED: Beta vulgaris subsp. vulgaris homeobox-leucine zipper protein ATHB-12-like (LOC104892624), mRNA	--	--	--	--	P46897	299	9.3e-26	Homeobox-leucine zipper protein ATHB-7 OS=Arabidopsis thaliana OX=3702 GN=ATHB-7 PE=1 SV=2	PF02183//PF05920//PF06056//PF00046	Homeobox associated leucine zipper//Homeobox KN domain//Putative ATPase subunit of terminase (gpP-like)//Homeodomain	GO:0019069//GO:0006355	viral capsid assembly//regulation of transcription, DNA-templated	GO:0043565//GO:0003677//GO:0005524	sequence-specific DNA binding//DNA binding//ATP binding	--	--	--	--	DOWN	-2.7455	3.4723e-171	blast,frame:-2 start:1402 end:1010|blast,frame:-3 start:957 end:586
Cluster-3181.11079-0R	GNAT	GNAT	Cluster-3181.11079	1219164038	XP_021745642.1	740	1e-75	uncharacterized protein LOC110711537 [Chenopodium quinoa]	XM_021997067.1	XM_021997067	345	2.03635e-179	PREDICTED: Spinacia oleracea uncharacterized N-acetyltransferase p20-like (LOC110792248), mRNA	--	--	--	--	P05332	155	2.6e-09	Uncharacterized N-acetyltransferase p20 OS=Bacillus licheniformis OX=1402 GN=p20 PE=4 SV=1	PF08445//PF13302//PF00583	FR47-like protein//Acetyltransferase (GNAT) domain//Acetyltransferase (GNAT) family	GO:0042967	obsolete acyl-carrier-protein biosynthetic process	GO:0008080//GO:0016747	N-acetyltransferase activity//transferase activity, transferring acyl groups other than amino-acyl groups	--	--	--	--	DOWN	-4.8398	2.5098e-24	blast,frame:-1 start:830 end:243
Cluster-3181.11361-2R	MYB-related	MYB->MYB-related	Cluster-3181.11361	902237227	KNA24714.1	298	1.4e-24	hypothetical protein SOVF_013360 [Spinacia oleracea]	XR_002509159.1	XR_002509159	118	2.3432e-53	PREDICTED: Chenopodium quinoa uncharacterized LOC110710383 (LOC110710383), ncRNA	--	--	--	--	Q1A173	231	3e-18	Protein RADIALIS-like 6 OS=Arabidopsis thaliana OX=3702 GN=RL6 PE=2 SV=1	--	--	--	--	--	--	--	--	--	--	UP	1.4446	5.5337e-14	blast,frame:-3 start:586 end:350
Cluster-3181.11586-0F	Others	Others	Cluster-3181.11586	731321422	XP_010671343.1	239	1.7e-17	PREDICTED: two-component response regulator-like APRR5 isoform X2 [Beta vulgaris subsp. vulgaris]	XM_022002617.1	XM_022002617	165	3.19123e-79	PREDICTED: Spinacia oleracea two-component response regulator-like APRR5 (LOC110797494), transcript variant X3, mRNA	K12130	PRR5	pseudo-response regulator 5	http://www.genome.jp/dbget-bin/www_bget?ko:K12130	Q6LA42	196	6.2e-14	Two-component response regulator-like APRR5 OS=Arabidopsis thaliana OX=3702 GN=APRR5 PE=1 SV=2	PF00072	Response regulator receiver domain	GO:0000160	phosphorelay signal transduction system	--	--	--	--	--	--	DOWN	-1.6631	0.0040963	blast,frame:2 start:98 end:400
Cluster-3181.12069-0R	AUX/IAA	AUX/IAA	Cluster-3181.12069	731364710	XP_010694123.1	309	3e-25	PREDICTED: auxin-responsive protein IAA4 [Beta vulgaris subsp. vulgaris]	XM_021919013.1	XM_021919013	103	2.15853e-44	PREDICTED: Chenopodium quinoa auxin-responsive protein IAA31-like (LOC110738620), mRNA	K14484	IAA	auxin-responsive protein IAA	http://www.genome.jp/dbget-bin/www_bget?ko:K14484	A2WNM0	203	2.2e-14	Auxin-responsive protein IAA4 OS=Oryza sativa subsp. indica OX=39946 GN=IAA4 PE=2 SV=1	--	--	--	--	--	--	--	--	--	--	UP	1.3219	1.0806e-11	blast,frame:-1 start:1358 end:993|blast,frame:-2 start:736 end:308
Cluster-3181.12069-1R	AUX/IAA	AUX/IAA	Cluster-3181.12069	731364710	XP_010694123.1	309	3e-25	PREDICTED: auxin-responsive protein IAA4 [Beta vulgaris subsp. vulgaris]	XM_021919013.1	XM_021919013	103	2.15853e-44	PREDICTED: Chenopodium quinoa auxin-responsive protein IAA31-like (LOC110738620), mRNA	K14484	IAA	auxin-responsive protein IAA	http://www.genome.jp/dbget-bin/www_bget?ko:K14484	A2WNM0	203	2.2e-14	Auxin-responsive protein IAA4 OS=Oryza sativa subsp. indica OX=39946 GN=IAA4 PE=2 SV=1	--	--	--	--	--	--	--	--	--	--	UP	1.3219	1.0806e-11	blast,frame:-1 start:1358 end:993|blast,frame:-2 start:736 end:308
Cluster-3181.12368-0R	AP2/ERF-ERF	AP2/ERF->AP2/ERF-ERF	Cluster-3181.12368	731340732	XP_010681557.1	790	3.7e-81	PREDICTED: ethylene-responsive transcription factor ERF118 [Beta vulgaris subsp. vulgaris]	XM_010683255.2	XM_010683255	174	5.40171e-84	PREDICTED: Beta vulgaris subsp. vulgaris ethylene-responsive transcription factor ERF118 (LOC104896506), transcript variant X2, mRNA	--	--	--	--	Q9LUA2	310	6.4e-27	Ethylene-responsive transcription factor ERF119 OS=Arabidopsis thaliana OX=3702 GN=ERF119 PE=2 SV=1	PF00847	AP2 domain	GO:0006355	regulation of transcription, DNA-templated	GO:0003700	DNA-binding transcription factor activity	GO:0005667	transcription regulator complex	--	--	DOWN	-1.1848	4.874e-26	blast,frame:-1 start:1007 end:3
Cluster-3181.12845-0R	MYB	MYB->MYB	Cluster-3181.12845	1219109506	XP_021717997.1	1146	1.1e-122	transcription factor RAX3-like [Chenopodium quinoa]	XM_021862305.1	XM_021862305	376	0	PREDICTED: Chenopodium quinoa transcription factor RAX3-like (LOC110685784), mRNA	K09422	MYBP	myb proto-oncogene protein, plant	http://www.genome.jp/dbget-bin/www_bget?ko:K09422	Q9M2Y9	661	7.2e-68	Transcription factor RAX3 OS=Arabidopsis thaliana OX=3702 GN=RAX3 PE=2 SV=1	--	--	--	--	--	--	--	--	--	--	DOWN	-3.6666	9.7531e-11	blast,frame:-1 start:1084 end:116
Cluster-3181.15592-0F	Coactivator p15	Coactivator p15	Cluster-3181.15592	--	--	--	--	--	XM_016619417.1	XM_016619417	49	2.41779e-14	PREDICTED: Nicotiana tabacum UDP-glycosyltransferase 73B4-like (LOC107796624), mRNA	--	--	--	--	--	--	--	--	--	--	--	--	--	--	--	--	--	--	DOWN	-2.2496	1.2124e-40	--
Cluster-3181.16828-1R	bHLH	bHLH	Cluster-3181.16828	1219103489	XP_021714985.1	1530	5.7e-167	putative transcription factor bHLH041 [Chenopodium quinoa]	XM_021891420.1	XM_021891420	342	2.19598e-177	PREDICTED: Chenopodium quinoa putative transcription factor bHLH041 (LOC110712962), mRNA	--	--	--	--	Q9LTS4	457	5.7e-44	Putative transcription factor bHLH041 OS=Arabidopsis thaliana OX=3702 GN=BHLH41 PE=3 SV=1	PF00010	Helix-loop-helix DNA-binding domain	--	--	GO:0046983	protein dimerization activity	--	--	--	--	DOWN	-2.5255	2.099e-05	blast,frame:-2 start:1761 end:166
Cluster-3181.17437-2R	MYB-related	MYB->MYB-related	Cluster-3181.17437	1219092204	XP_021772302.1	371	7.2e-33	uncharacterized protein LOC110736398 [Chenopodium quinoa]	--	--	--	--	--	--	--	--	--	--	--	--	--	--	--	--	--	--	--	--	--	--	--	UP	1.0451	0.0011922	blast,frame:-3 start:1038 end:445
Cluster-3181.17660-1R	FAR1	FAR1	Cluster-3181.17660	1387789569	PWA58531.1	2089	1.9e-231	protein FAR1-RELATED SEQUENCE 11 [Artemisia annua]	XR_002529575.1	XR_002529575	755	0	PREDICTED: Spinacia oleracea uncharacterized LOC110774751 (LOC110774751), transcript variant X2, ncRNA	--	--	--	--	Q9SY66	1232	1.7e-133	Protein FAR1-RELATED SEQUENCE 11 OS=Arabidopsis thaliana OX=3702 GN=FRS11 PE=1 SV=1	PF00872//PF04434	Transposase, Mutator family//SWIM zinc finger	GO:0006313	transposition, DNA-mediated	GO:0008270//GO:0003677//GO:0004803	zinc ion binding//DNA binding//transposase activity	--	--	--	--	UP	2.344	1.2261e-59	blast,frame:-2 start:2373 end:250
Cluster-3181.1840-0F	HB-HD-ZIP	HB->HB-HD-ZIP	Cluster-3181.1840	731344097	XP_010683230.1	1086	1.5e-115	PREDICTED: homeobox-leucine zipper protein ATHB-13 [Beta vulgaris subsp. vulgaris]	XM_010684928.2	XM_010684928	451	0	PREDICTED: Beta vulgaris subsp. vulgaris homeobox-leucine zipper protein ATHB-13 (LOC104897949), transcript variant X2, mRNA	K09338	HD-ZIP	homeobox-leucine zipper protein	http://www.genome.jp/dbget-bin/www_bget?ko:K09338	Q8LC03	667	2.2e-68	Homeobox-leucine zipper protein ATHB-13 OS=Arabidopsis thaliana OX=3702 GN=ATHB-13 PE=2 SV=2	PF02183//PF15957//PF08961//PF00046//PF06156//PF08172//PF05920	Homeobox associated leucine zipper//Commissureless//Nuclear receptor-binding factor 2, autophagy regulator//Homeodomain//Initiation control protein YabA//CASP C terminal//Homeobox KN domain	GO:0006914//GO:0007411//GO:0006355//GO:0006260//GO:0006891	autophagy//axon guidance//regulation of transcription, DNA-templated//DNA replication//intra-Golgi vesicle-mediated transport	GO:0003677//GO:0043565	DNA binding//sequence-specific DNA binding	GO:0030173	integral component of Golgi membrane	--	--	DOWN	-2.0794	9.4923e-18	--
Cluster-3181.18635-0F	MYB-related	MYB->MYB-related	Cluster-3181.18635	1226780355	XP_021856226.1	913	2.8e-95	transcription factor MYBS3 [Spinacia oleracea]	XM_021902129.1	XM_021902129	412	0	PREDICTED: Chenopodium quinoa transcription factor MYBS3-like (LOC110722830), mRNA	--	--	--	--	Q9LVS0	542	1.1e-53	Transcription factor KUA1 OS=Arabidopsis thaliana OX=3702 GN=KUA1 PE=1 SV=1	PF12199	Extracellular fibrinogen binding protein C terminal	--	--	GO:0001848	complement binding	GO:0005615	extracellular space	--	--	UP	1.0383	4.1174e-53	blast,frame:1 start:1477 end:2313
Cluster-3181.18809-0F	SNF2	SNF2	Cluster-3181.18809	870847642	KMS99989.1	2854	0	hypothetical protein BVRB_1g018280 isoform A [Beta vulgaris subsp. vulgaris]	XM_010693812.2	XM_010693812	1299	0	PREDICTED: Beta vulgaris subsp. vulgaris probable helicase CHR10 (LOC104905318), mRNA	K20092	CHD1L	chromodomain-helicase-DNA-binding protein 1-like	http://www.genome.jp/dbget-bin/www_bget?ko:K20092	F4IV45	1981	1.3e-220	Probable helicase CHR10 OS=Arabidopsis thaliana OX=3702 GN=CHR10 PE=3 SV=1	PF04851//PF11496//PF00176	Type III restriction enzyme, res subunit//Class II histone deacetylase complex subunits 2 and 3//SNF2 family N-terminal domain	GO:0016575	histone deacetylation	GO:0003677//GO:0016787//GO:0005524	DNA binding//hydrolase activity//ATP binding	GO:0070823	HDA1 complex	KOG0384	Chromodomain-helicase DNA-binding protein	UP	1.0906	0.037524	--
Cluster-3181.19-1R	GRF	GRF	Cluster-3181.19	1226831090	XP_021864714.1	669	3.2e-67	growth-regulating factor 1-like [Spinacia oleracea]	XM_010667960.2	XM_010667960	486	0	PREDICTED: Beta vulgaris subsp. vulgaris growth-regulating factor 1 (LOC104883432), mRNA	--	--	--	--	Q8L8A6	452	1.8e-43	Growth-regulating factor 5 OS=Arabidopsis thaliana OX=3702 GN=GRF5 PE=1 SV=1	PF08880//PF00520	QLQ//Ion transport protein	GO:0006811//GO:0006355//GO:0055085	ion transport//regulation of transcription, DNA-templated//transmembrane transport	GO:0005216//GO:0005524	ion channel activity//ATP binding	GO:0016020//GO:0005634	membrane//nucleus	--	--	DOWN	-2.2133	3.034e-09	blast,frame:-2 start:1554 end:343
Cluster-3181.20132-1R	NF-YA	NF-Y->NF-YA	Cluster-3181.20132	1226847867	XP_021837732.1	600	5.3e-59	nuclear transcription factor Y subunit A-1-like isoform X3 [Spinacia oleracea]	XM_010696906.2	XM_010696906	270	3.16234e-137	PREDICTED: Beta vulgaris subsp. vulgaris nuclear transcription factor Y subunit A-4 (LOC104907882), mRNA	K08064	NFYA	nuclear transcription factor Y, alpha	http://www.genome.jp/dbget-bin/www_bget?ko:K08064	Q84JP1	207	7.6e-15	Nuclear transcription factor Y subunit A-7 OS=Arabidopsis thaliana OX=3702 GN=NFYA7 PE=1 SV=1	PF03287//PF02045	Poxvirus C7/F8A protein//CCAAT-binding transcription factor (CBF-B/NF-YA) subunit B	GO:0006355//GO:0016032	regulation of transcription, DNA-templated//viral process	GO:0003700	DNA-binding transcription factor activity	GO:0005667	transcription regulator complex	--	--	DOWN	-1.6122	2.7194e-108	blast,frame:-3 start:1330 end:1064|blast,frame:-1 start:2430 end:1849
Cluster-3181.21539-2R	B3-ARF	B3->B3-ARF	Cluster-3181.21539	731311248	XP_010696146.1	1429	3.4e-155	PREDICTED: auxin response factor 18 [Beta vulgaris subsp. vulgaris]	XM_010697844.2	XM_010697844	624	0	PREDICTED: Beta vulgaris subsp. vulgaris auxin response factor 18 (LOC104908672), mRNA	K14486	K14486, ARF	auxin response factor	http://www.genome.jp/dbget-bin/www_bget?ko:K14486	Q9XED8	1175	3.7e-127	Auxin response factor 9 OS=Arabidopsis thaliana OX=3702 GN=ARF9 PE=1 SV=1	PF02362//PF06507	B3 DNA binding domain//Auxin response factor	GO:0009725//GO:0006355	response to hormone//regulation of transcription, DNA-templated	GO:0003677	DNA binding	GO:0005634	nucleus	--	--	DOWN	-1.1836	5.1626e-21	blast,frame:-3 start:1811 end:741
Cluster-3181.22477-0R	bZIP	bZIP	Cluster-3181.22477	1219177075	XP_021752174.1	460	5.6e-43	transcription factor HY5-like isoform X1 [Chenopodium quinoa]	XM_021919014.1	XM_021919014	205	2.59516e-101	PREDICTED: Chenopodium quinoa transcription factor HY5-like (LOC110738622), mRNA	--	--	--	--	Q8W191	328	4.3e-29	Transcription factor HY5-like OS=Arabidopsis thaliana OX=3702 GN=HYH PE=1 SV=1	PF00170//PF03131//PF07716//PF08198//PF02724	bZIP transcription factor//bZIP Maf transcription factor//Basic region leucine zipper//Thymopoietin protein//CDC45-like protein	GO:0006270//GO:0006355	DNA replication initiation//regulation of transcription, DNA-templated	GO:0003677//GO:0003700	DNA binding//DNA-binding transcription factor activity	GO:0005634//GO:0005667	nucleus//transcription regulator complex	--	--	DOWN	-2.151	1.2574e-34	blast,frame:-1 start:1264 end:761
Cluster-3181.22769-1R	SWI/SNF-SWI3	SWI/SNF-SWI3	Cluster-3181.22769	1226825289	XP_021861821.1	594	8.7e-59	lysine-specific histone demethylase 1 homolog 1 [Spinacia oleracea]	--	--	--	--	--	K11450	KDM1A, AOF2, LSD1	lysine-specific histone demethylase 1A	http://www.genome.jp/dbget-bin/www_bget?ko:K11450	Q8VXV7	354	2.2e-32	Lysine-specific histone demethylase 1 homolog 1 OS=Arabidopsis thaliana OX=3702 GN=LDL1 PE=1 SV=1	PF04433//PF07992//PF01494//PF01593//PF01266//PF06632//PF06333//PF02826//PF03286	SWIRM domain//Pyridine nucleotide-disulphide oxidoreductase//FAD binding domain//Flavin containing amine oxidoreductase//FAD dependent oxidoreductase//DNA double-strand break repair and V(D)J recombination protein XRCC4//Mediator complex subunit 13 C-terminal domain//D-isomer specific 2-hydroxyacid dehydrogenase, NAD binding domain//Pox virus Ag35 surface protein	GO:0006310//GO:0006357//GO:0006302//GO:0055114	DNA recombination//regulation of transcription by RNA polymerase II//double-strand break repair//oxidation-reduction process	GO:0003677//GO:0005515//GO:0016491//GO:0051287//GO:0003712//GO:0071949	DNA binding//protein binding//oxidoreductase activity//NAD binding//transcription coregulator activity//FAD binding	GO:0019031//GO:0005667//GO:0016592//GO:0005634	viral envelope//transcription regulator complex//mediator complex//nucleus	--	--	UP	1.2126	0.0042936	blast,frame:-2 start:904 end:2
Cluster-3181.22849-2F	AUX/IAA	AUX/IAA	Cluster-3181.22849	902231103	KNA22120.1	909	4.3e-95	hypothetical protein SOVF_037010 [Spinacia oleracea]	XM_010680863.2	XM_010680863	421	0	PREDICTED: Beta vulgaris subsp. vulgaris auxin-responsive protein IAA14 (LOC104894592), mRNA	K14484	IAA	auxin-responsive protein IAA	http://www.genome.jp/dbget-bin/www_bget?ko:K14484	Q38825	714	6.7e-74	Auxin-responsive protein IAA7 OS=Arabidopsis thaliana OX=3702 GN=IAA7 PE=1 SV=1	PF05090//PF13994	Vitamin K-dependent gamma-carboxylase//PgaD-like protein	GO:0017187//GO:0043709	peptidyl-glutamic acid carboxylation//cell adhesion involved in single-species biofilm formation	GO:0008488	gamma-glutamyl carboxylase activity	--	--	--	--	UP	1.7415	1.8941e-60	blast,frame:3 start:225 end:1031
Cluster-3181.23037-2F	GRF	GRF	Cluster-3181.23037	870847802	KMT00150.1	404	2.8e-36	hypothetical protein BVRB_1g019700 isoform A [Beta vulgaris subsp. vulgaris]	XM_010694009.1	XM_010694009	91	1.00545e-37	PREDICTED: Beta vulgaris subsp. vulgaris growth-regulating factor 9 (LOC104905457), mRNA	--	--	--	--	Q6AWY6	205	1.3e-14	Growth-regulating factor 3 OS=Oryza sativa subsp. japonica OX=39947 GN=GRF3 PE=3 SV=2	PF08880//PF09329//PF00956//PF11722	QLQ//Primase zinc finger//Nucleosome assembly protein (NAP)//CCCH zinc finger in TRM13 protein	GO:0006355//GO:0006334//GO:0006260	regulation of transcription, DNA-templated//nucleosome assembly//DNA replication	GO:0008168//GO:0005524	methyltransferase activity//ATP binding	GO:0005634	nucleus	--	--	DOWN	-2.5595	1.7054e-25	blast,frame:3 start:813 end:1331
Cluster-3181.23809-0R	Others	Others	Cluster-3181.23809	1219051069	XP_021736546.1	1148	1.6e-122	zinc finger protein CONSTANS-LIKE 2-like isoform X1 [Chenopodium quinoa]	XM_021880854.1	XM_021880854	611	0	PREDICTED: Chenopodium quinoa zinc finger protein CONSTANS-LIKE 2-like (LOC110703096), transcript variant X1, mRNA	--	--	--	--	Q96502	627	1.5e-63	Zinc finger protein CONSTANS-LIKE 2 OS=Arabidopsis thaliana OX=3702 GN=COL2 PE=1 SV=1	PF00643//PF02045//PF06203//PF10417//PF03660	B-box zinc finger//CCAAT-binding transcription factor (CBF-B/NF-YA) subunit B//CCT motif//C-terminal domain of 1-Cys peroxiredoxin//PHF5-like protein	GO:0006355//GO:0055114//GO:0000398	regulation of transcription, DNA-templated//oxidation-reduction process//mRNA splicing, via spliceosome	GO:0005515//GO:0008270//GO:0003700//GO:0051920	protein binding//zinc ion binding//DNA-binding transcription factor activity//peroxiredoxin activity	GO:0005667	transcription regulator complex	--	--	DOWN	-1.3087	4.3469e-101	blast,frame:-1 start:2093 end:1245|blast,frame:-2 start:745 end:353
Cluster-3181.23809-1R	Others	Others	Cluster-3181.23809	1219051069	XP_021736546.1	1148	1.6e-122	zinc finger protein CONSTANS-LIKE 2-like isoform X1 [Chenopodium quinoa]	XM_021880854.1	XM_021880854	611	0	PREDICTED: Chenopodium quinoa zinc finger protein CONSTANS-LIKE 2-like (LOC110703096), transcript variant X1, mRNA	--	--	--	--	Q96502	627	1.5e-63	Zinc finger protein CONSTANS-LIKE 2 OS=Arabidopsis thaliana OX=3702 GN=COL2 PE=1 SV=1	PF00643//PF02045//PF06203//PF10417//PF03660	B-box zinc finger//CCAAT-binding transcription factor (CBF-B/NF-YA) subunit B//CCT motif//C-terminal domain of 1-Cys peroxiredoxin//PHF5-like protein	GO:0006355//GO:0055114//GO:0000398	regulation of transcription, DNA-templated//oxidation-reduction process//mRNA splicing, via spliceosome	GO:0005515//GO:0008270//GO:0003700//GO:0051920	protein binding//zinc ion binding//DNA-binding transcription factor activity//peroxiredoxin activity	GO:0005667	transcription regulator complex	--	--	DOWN	-1.3087	4.3469e-101	blast,frame:-1 start:2093 end:1245|blast,frame:-2 start:745 end:353
Cluster-3181.24502-1F	C2H2	C2H2	Cluster-3181.24502	1219067167	XP_021759526.1	708	9.5e-72	zinc finger protein ZAT10-like [Chenopodium quinoa]	XM_021903834.1	XM_021903834	129	4.4641e-59	PREDICTED: Chenopodium quinoa zinc finger protein ZAT10-like (LOC110724416), mRNA	--	--	--	--	Q96289	357	1.8e-32	Zinc finger protein ZAT10 OS=Arabidopsis thaliana OX=3702 GN=ZAT10 PE=2 SV=1	PF00096	Zinc finger, C2H2 type	--	--	GO:0003676	nucleic acid binding	--	--	--	--	DOWN	-1.144	1.3126e-123	blast,frame:2 start:299 end:1234
Cluster-3181.24733-1R	bHLH	bHLH	Cluster-3181.24733	1219079064	XP_021765652.1	1820	2e-200	LOW QUALITY PROTEIN: transcription factor MYC2-like [Chenopodium quinoa]	XM_021912498.1	XM_021912498	350	0	PREDICTED: Chenopodium quinoa transcription factor MYC2-like (LOC110732543), mRNA	K13422	MYC2	transcription factor MYC2	http://www.genome.jp/dbget-bin/www_bget?ko:K13422	A0A060KY90	1216	8.1e-132	Transcription factor MYC1 OS=Solanum lycopersicum OX=4081 GN=MYC1 PE=1 SV=1	PF09270//PF00010	Beta-trefoil DNA-binding domain//Helix-loop-helix DNA-binding domain	GO:0006357	regulation of transcription by RNA polymerase II	GO:0046983//GO:0000978	protein dimerization activity//RNA polymerase II cis-regulatory region sequence-specific DNA binding	--	--	--	--	DOWN	-1.4096	6.2308e-43	blast,frame:-2 start:2645 end:522
Cluster-3181.24849-0F	C2C2-Dof	C2C2->C2C2-Dof	Cluster-3181.24849	870852716	KMT04631.1	597	6.6e-59	hypothetical protein BVRB_8g182840 [Beta vulgaris subsp. vulgaris]	XM_021884930.1	XM_021884930	224	6.51923e-112	PREDICTED: Chenopodium quinoa dof zinc finger protein DOF1.4-like (LOC110706931), mRNA	--	--	--	--	Q9FZA4	320	3.3e-28	Dof zinc finger protein DOF1.4 OS=Arabidopsis thaliana OX=3702 GN=DOF1.4 PE=2 SV=1	PF11712//PF02701	Endoplasmic reticulum-based factor for assembly of V-ATPase//Dof domain, zinc finger	GO:0070072//GO:0006355	vacuolar proton-transporting V-type ATPase complex assembly//regulation of transcription, DNA-templated	GO:0003677	DNA binding	--	--	--	--	DOWN	-1.1278	1.1256e-08	blast,frame:1 start:1 end:1320
Cluster-3181.25081-2F	MYB-related	MYB->MYB-related	Cluster-3181.25081	731371030	XP_010665911.1	1104	1.4e-117	PREDICTED: transcription factor MYB1R1 [Beta vulgaris subsp. vulgaris]	XM_021894285.1	XM_021894285	314	8.20868e-162	PREDICTED: Chenopodium quinoa transcription factor MYBS3-like (LOC110715681), mRNA	--	--	--	--	Q7XC57	565	1.7e-56	Transcription factor MYBS3 OS=Oryza sativa subsp. japonica OX=39947 GN=MYBS3 PE=2 SV=1	--	--	--	--	--	--	--	--	--	--	DOWN	-1.4692	7.4541e-127	blast,frame:3 start:288 end:1487
Cluster-3181.25615-1F	GARP-ARR-B	GARP->GARP-ARR-B	Cluster-3181.25615	870860372	KMT11725.1	2273	8.5e-253	hypothetical protein BVRB_5g106620 isoform A [Beta vulgaris subsp. vulgaris]	XM_019249533.1	XM_019249533	910	0	PREDICTED: Beta vulgaris subsp. vulgaris two-component response regulator-like APRR2 (LOC104892971), transcript variant X1, mRNA	--	--	--	--	Q6LA43	1077	1.6e-115	Two-component response regulator-like APRR2 OS=Arabidopsis thaliana OX=3702 GN=APRR2 PE=2 SV=2	PF00072	Response regulator receiver domain	GO:0000160	phosphorelay signal transduction system	--	--	--	--	--	--	DOWN	-1.8368	1.9488e-129	blast,frame:2 start:635 end:2332
Cluster-3181.25717-1F	C3H	C3H	Cluster-3181.25717	902191225	KNA11798.1	1611	4.2e-176	hypothetical protein SOVF_131580 [Spinacia oleracea]	XM_022005304.1	XM_022005304	668	0	PREDICTED: Spinacia oleracea putative RING-type E3 ubiquitin transferase C3H69 (LOC110800011), transcript variant X2, mRNA	K15687	MKRN	E3 ubiquitin-protein ligase makorin	http://www.genome.jp/dbget-bin/www_bget?ko:K15687	Q5ZA07	1206	1.5e-130	E3 ubiquitin-protein ligase makorin OS=Oryza sativa subsp. japonica OX=39947 GN=MKRN PE=2 SV=1	PF00642//PF11956//PF12678//PF00097	Zinc finger C-x8-C-x5-C-x3-H type (and similar)//Ankyrin-G binding motif of KCNQ2-3//RING-H2 zinc finger domain//Zinc finger, C3HC4 type (RING finger)	GO:0006813	potassium ion transport	GO:0046872//GO:0005267//GO:0008270	metal ion binding//potassium channel activity//zinc ion binding	GO:0016020	membrane	KOG1039	Predicted E3 ubiquitin ligase	UP	2.2077	5.3475e-197	blast,frame:2 start:161 end:1234
Cluster-3181.25824-2F	Jumonji	Jumonji	Cluster-3181.25824	731332733	XP_010677367.1	2987	0	PREDICTED: lysine-specific demethylase JMJ706 [Beta vulgaris subsp. vulgaris]	XM_010679065.2	XM_010679065	1270	0	PREDICTED: Beta vulgaris subsp. vulgaris lysine-specific demethylase JMJ706 (LOC104893026), mRNA	--	--	--	--	Q336N8	1753	7.3e-194	Lysine-specific demethylase JMJ706 OS=Oryza sativa subsp. japonica OX=39947 GN=JMJ706 PE=2 SV=1	--	--	--	--	--	--	--	--	KOG1246	DNA-binding protein jumonji/RBP2/SMCY, contains JmjC domain	UP	1.4827	1.7838e-115	blast,frame:1 start:3625 end:4146|blast,frame:3 start:624 end:2969
Cluster-3181.25890-1F	Others	Others	Cluster-3181.25890	1219168420	XP_021747801.1	609	3.4e-60	two-component response regulator ARR17-like isoform X1 [Chenopodium quinoa]	XM_010685017.2	XM_010685017	242	8.02108e-122	PREDICTED: Beta vulgaris subsp. vulgaris two-component response regulator ARR5 (LOC104898023), transcript variant X1, mRNA	K14492	ARR-A	two-component response regulator ARR-A family	http://www.genome.jp/dbget-bin/www_bget?ko:K14492	O82798	414	5.2e-39	Two-component response regulator ARR4 OS=Arabidopsis thaliana OX=3702 GN=ARR4 PE=1 SV=1	PF00072//PF04922	Response regulator receiver domain//DIE2/ALG10 family	GO:0000160//GO:0006488	phosphorelay signal transduction system//dolichol-linked oligosaccharide biosynthetic process	GO:0106073	dolichyl pyrophosphate Glc2Man9GlcNAc2 alpha-1,2-glucosyltransferase activity	--	--	--	--	DOWN	-2.2648	3.8229e-60	blast,frame:2 start:425 end:904|blast,frame:3 start:897 end:1400
Cluster-3181.25893-2R	Others	Others	Cluster-3181.25893	731371144	XP_010665952.1	4065	0	PREDICTED: histidine kinase 2 [Beta vulgaris subsp. vulgaris]	XM_021910624.1	XM_021910624	949	0	PREDICTED: Chenopodium quinoa histidine kinase 2-like (LOC110730801), mRNA	K14489	AHK2_3_4	arabidopsis histidine kinase 2/3/4 (cytokinin receptor)	http://www.genome.jp/dbget-bin/www_bget?ko:K14489	Q9C5U2	3059	0	Histidine kinase 2 OS=Arabidopsis thaliana OX=3702 GN=AHK2 PE=1 SV=1	PF06667//PF00512//PF00072	Phage shock protein B//His Kinase A (phospho-acceptor) domain//Response regulator receiver domain	GO:0000160//GO:0016310//GO:0009271//GO:0007165//GO:0006355	phosphorelay signal transduction system//phosphorylation//phage shock//signal transduction//regulation of transcription, DNA-templated	GO:0000155	phosphorelay sensor kinase activity	GO:0009365	protein histidine kinase complex	--	--	DOWN	-1.6137	8.9861e-46	--
Cluster-3181.261-2F	FAR1	FAR1	Cluster-3181.261	1226845974	XP_021836805.1	793	2.4e-81	protein FAR-RED IMPAIRED RESPONSE 1-like [Spinacia oleracea]	--	--	--	--	--	--	--	--	--	Q9SSQ4	344	1.1e-30	Protein FAR1-RELATED SEQUENCE 6 OS=Arabidopsis thaliana OX=3702 GN=FRS6 PE=2 SV=1	PF06663//PF04434	Protein of unknown function (DUF1170)//SWIM zinc finger	GO:0009966	regulation of signal transduction	GO:0008270	zinc ion binding	GO:0005737//GO:0016020	cytoplasm//membrane	--	--	UP	7.455	2.4809e-11	--
Cluster-3181.26216-0R	C3H	C3H	Cluster-3181.26216	1219104570	XP_021715510.1	187	3.1e-11	zinc finger CCCH domain-containing protein 42-like [Chenopodium quinoa]	--	--	--	--	--	K13107	RBMX2, IST3	RNA-binding motif protein, X-linked 2	http://www.genome.jp/dbget-bin/www_bget?ko:K13107	Q9SD61	176	2.2e-11	Zinc finger CCCH domain-containing protein 42 OS=Arabidopsis thaliana OX=3702 GN=At3g47120 PE=2 SV=1	PF03839	Translocation protein Sec62	GO:0015031	protein transport	--	--	GO:0030176	integral component of endoplasmic reticulum membrane	--	--	DOWN	-1.1941	3.2375e-09	--
Cluster-3181.26771-0R	Others	Others	Cluster-3181.26771	1226804902	XP_021851770.1	942	1.6e-98	zinc finger protein CONSTANS-LIKE 13 [Spinacia oleracea]	XM_021875236.1	XM_021875236	286	5.52142e-146	PREDICTED: Chenopodium quinoa zinc finger protein CONSTANS-LIKE 13-like (LOC110697837), mRNA	--	--	--	--	O82256	404	1.5e-37	Zinc finger protein CONSTANS-LIKE 13 OS=Arabidopsis thaliana OX=3702 GN=COL13 PE=1 SV=1	PF00979//PF00130//PF00643	Reovirus outer capsid protein, Sigma 3//Phorbol esters/diacylglycerol binding domain (C1 domain)//B-box zinc finger	GO:0035556//GO:0019058	intracellular signal transduction//viral life cycle	GO:0008270//GO:0005198	zinc ion binding//structural molecule activity	--	--	--	--	UP	1.2733	6.1893e-32	blast,frame:-2 start:3469 end:2600|blast,frame:-1 start:794 end:369
Cluster-3181.26771-1R	DBB	DBB	Cluster-3181.26771	1226804902	XP_021851770.1	942	1.6e-98	zinc finger protein CONSTANS-LIKE 13 [Spinacia oleracea]	XM_021875236.1	XM_021875236	286	5.52142e-146	PREDICTED: Chenopodium quinoa zinc finger protein CONSTANS-LIKE 13-like (LOC110697837), mRNA	--	--	--	--	O82256	404	1.5e-37	Zinc finger protein CONSTANS-LIKE 13 OS=Arabidopsis thaliana OX=3702 GN=COL13 PE=1 SV=1	PF00979//PF00130//PF00643	Reovirus outer capsid protein, Sigma 3//Phorbol esters/diacylglycerol binding domain (C1 domain)//B-box zinc finger	GO:0035556//GO:0019058	intracellular signal transduction//viral life cycle	GO:0008270//GO:0005198	zinc ion binding//structural molecule activity	--	--	--	--	UP	1.2733	6.1893e-32	blast,frame:-2 start:3469 end:2600|blast,frame:-1 start:794 end:369
Cluster-3181.28138-2R	WRKY	WRKY	Cluster-3181.28138	763785174	KJB52245.1	178	1.6e-10	hypothetical protein B456_008G253300 [Gossypium raimondii]	--	--	--	--	--	--	--	--	--	Q8H0Y8	145	4.2e-08	Probable WRKY transcription factor 41 OS=Arabidopsis thaliana OX=3702 GN=WRKY41 PE=2 SV=2	PF03106	WRKY DNA -binding domain	GO:0006355	regulation of transcription, DNA-templated	GO:0003700//GO:0043565	DNA-binding transcription factor activity//sequence-specific DNA binding	GO:0005667	transcription regulator complex	--	--	DOWN	-2.2105	2.739e-23	blast,frame:-3 start:818 end:537
Cluster-3181.28164-2F	WRKY	WRKY	Cluster-3181.28164	1219135733	XP_021731200.1	1623	1.3e-177	probable WRKY transcription factor 33 [Chenopodium quinoa]	XM_021875508.1	XM_021875508	637	0	PREDICTED: Chenopodium quinoa probable WRKY transcription factor 33 (LOC110698105), mRNA	K13424	WRKY33	WRKY transcription factor 33	http://www.genome.jp/dbget-bin/www_bget?ko:K13424	Q8S8P5	897	7.8e-95	Probable WRKY transcription factor 33 OS=Arabidopsis thaliana OX=3702 GN=WRKY33 PE=1 SV=2	PF06839//PF03106	GRF zinc finger//WRKY DNA -binding domain	GO:0006355	regulation of transcription, DNA-templated	GO:0003700//GO:0008270//GO:0043565	DNA-binding transcription factor activity//zinc ion binding//sequence-specific DNA binding	GO:0005667	transcription regulator complex	--	--	DOWN	-3.4192	0	blast,frame:2 start:641 end:826|blast,frame:3 start:1548 end:2747|blast,frame:1 start:166 end:597
Cluster-3181.28476-0F	Rcd1-like	Rcd1-like	Cluster-3181.28476	1585671573	XP_028110009.1	686	8e-69	CCR4-NOT transcription complex subunit 9-like isoform X1 [Camellia sinensis]	XM_024341388.1	XM_024341388	161	1.74636e-76	PREDICTED: Rosa chinensis CCR4-NOT transcription complex subunit 9-like (LOC112200363), transcript variant X2, mRNA	K12606	RCD1, CNOT9, CAF40	CCR4-NOT transcription complex subunit 9	http://www.genome.jp/dbget-bin/www_bget?ko:K12606	Q6NWL4	562	7.3e-56	CCR4-NOT transcription complex subunit 9 OS=Danio rerio OX=7955 GN=cnot9 PE=2 SV=1	PF03827	Orexin receptor type 2	GO:0007631//GO:0022410//GO:0007186//GO:0007187	feeding behavior//circadian sleep/wake cycle process//G protein-coupled receptor signaling pathway//G protein-coupled receptor signaling pathway, coupled to cyclic nucleotide second messenger	GO:0016499	orexin receptor activity	GO:0016021	integral component of membrane	KOG3036	Protein involved in cell differentiation/sexual development	DOWN	-1.6922	7.1897e-09	--
Cluster-3181.2862-0F	C2C2-LSD	C2C2->C2C2-LSD	Cluster-3181.2862	1226825458	XP_021861908.1	200	7.4e-13	protein LOL2-like isoform X2 [Spinacia oleracea]	XM_021884899.1	XM_021884899	131	3.36453e-60	PREDICTED: Chenopodium quinoa proline-, glutamic acid- and leucine-rich protein 1-like (LOC110706907), mRNA	--	--	--	--	O65426	159	1.6e-09	Protein LOL2 OS=Arabidopsis thaliana OX=3702 GN=LOL2 PE=1 SV=1	PF03666//PF02535//PF15748//PF06003	Nitrogen Permease regulator of amino acid transport activity 3//ZIP Zinc transporter//Centriole, cilia and spindle-associated//Survival motor neuron protein (SMN)	GO:0034198//GO:0032007//GO:0055085//GO:0030001//GO:0006397	cellular response to amino acid starvation//negative regulation of TOR signaling//transmembrane transport//metal ion transport//mRNA processing	GO:0003723//GO:0046873	RNA binding//metal ion transmembrane transporter activity	GO:0005737//GO:0005856//GO:0016020//GO:0005634	cytoplasm//cytoskeleton//membrane//nucleus	--	--	UP	1.5021	2.5554e-12	blast,frame:1 start:391 end:855|blast,frame:3 start:642 end:1034
Cluster-3181.2862-2F	C2C2-LSD	C2C2->C2C2-LSD	Cluster-3181.2862	1226825458	XP_021861908.1	200	7.4e-13	protein LOL2-like isoform X2 [Spinacia oleracea]	XM_021884899.1	XM_021884899	131	3.36453e-60	PREDICTED: Chenopodium quinoa proline-, glutamic acid- and leucine-rich protein 1-like (LOC110706907), mRNA	--	--	--	--	O65426	159	1.6e-09	Protein LOL2 OS=Arabidopsis thaliana OX=3702 GN=LOL2 PE=1 SV=1	PF03666//PF02535//PF15748//PF06003	Nitrogen Permease regulator of amino acid transport activity 3//ZIP Zinc transporter//Centriole, cilia and spindle-associated//Survival motor neuron protein (SMN)	GO:0034198//GO:0032007//GO:0055085//GO:0030001//GO:0006397	cellular response to amino acid starvation//negative regulation of TOR signaling//transmembrane transport//metal ion transport//mRNA processing	GO:0003723//GO:0046873	RNA binding//metal ion transmembrane transporter activity	GO:0005737//GO:0005856//GO:0016020//GO:0005634	cytoplasm//cytoskeleton//membrane//nucleus	--	--	UP	1.5021	2.5554e-12	blast,frame:1 start:391 end:855|blast,frame:3 start:642 end:1034
Cluster-3181.29197-1F	Others	Others	Cluster-3181.29197	870864597	KMT15692.1	3099	0	hypothetical protein BVRB_3g056770 [Beta vulgaris subsp. vulgaris]	XM_010673827.2	XM_010673827	1280	0	PREDICTED: Beta vulgaris subsp. vulgaris ethylene receptor 2 (LOC104888764), mRNA	K14509	ETR, ERS	ethylene receptor	http://www.genome.jp/dbget-bin/www_bget?ko:K14509	Q0WPQ2	1939	1.4e-215	Ethylene receptor 2 OS=Arabidopsis thaliana OX=3702 GN=ETR2 PE=1 SV=2	PF01229//PF13492//PF00512//PF01590//PF00072	Glycosyl hydrolases family 39//GAF domain//His Kinase A (phospho-acceptor) domain//GAF domain//Response regulator receiver domain	GO:0007165//GO:0000160//GO:0016310//GO:0005975	signal transduction//phosphorelay signal transduction system//phosphorylation//carbohydrate metabolic process	GO:0000155//GO:0004553//GO:0005515	phosphorelay sensor kinase activity//hydrolase activity, hydrolyzing O-glycosyl compounds//protein binding	GO:0009365	protein histidine kinase complex	--	--	UP	2.1472	5.8298e-201	blast,frame:2 start:638 end:2938
Cluster-3181.29668-0F	RWP-RK	RWP-RK	Cluster-3181.29668	1226845592	XP_021836631.1	2154	3.9e-239	protein NLP4-like [Spinacia oleracea]	XM_021876496.1	XM_021876496	552	0	PREDICTED: Chenopodium quinoa protein NLP4-like (LOC110699011), transcript variant X2, mRNA	--	--	--	--	Q9LE38	1308	1.9e-142	Protein NLP4 OS=Arabidopsis thaliana OX=3702 GN=NLP4 PE=2 SV=1	PF13185//PF00564//PF04218	GAF domain//PB1 domain//CENP-B N-terminal DNA-binding domain	--	--	GO:0003677//GO:0005515	DNA binding//protein binding	--	--	--	--	DOWN	-1.3555	4.17e-79	blast,frame:1 start:706 end:2553|blast,frame:2 start:2 end:103|blast,frame:3 start:477 end:650
Cluster-3181.30136-0F	DBB	DBB	Cluster-3181.30136	1219055561	XP_021753489.1	907	2e-94	B-box zinc finger protein 19-like isoform X1 [Chenopodium quinoa]	XM_021883032.1	XM_021883032	376	0	PREDICTED: Chenopodium quinoa B-box zinc finger protein 19-like (LOC110705180), transcript variant X1, mRNA	--	--	--	--	C0SVM5	583	2.9e-58	B-box zinc finger protein 19 OS=Arabidopsis thaliana OX=3702 GN=BBX19 PE=1 SV=1	PF00643	B-box zinc finger	--	--	GO:0008270	zinc ion binding	--	--	--	--	DOWN	-1.9257	7.2858e-92	blast,frame:1 start:427 end:1311
Cluster-3181.30272-0R	bHLH	bHLH	Cluster-3181.30272	1219091687	XP_021772031.1	1525	2.8e-166	transcription factor bHLH130-like [Chenopodium quinoa]	XM_021873245.1	XM_021873245	578	0	PREDICTED: Chenopodium quinoa transcription factor bHLH130-like (LOC110695988), mRNA	--	--	--	--	Q66GR3	464	1.1e-44	Transcription factor bHLH130 OS=Arabidopsis thaliana OX=3702 GN=BHLH130 PE=1 SV=1	PF06466//PF17204//PF00010	PCAF (P300/CBP-associated factor) N-terminal domain//Sid-5 family//Helix-loop-helix DNA-binding domain	GO:0050658//GO:0042967//GO:0006355//GO:0016246	RNA transport//obsolete acyl-carrier-protein biosynthetic process//regulation of transcription, DNA-templated//RNA interference	GO:0004402//GO:0046983	histone acetyltransferase activity//protein dimerization activity	GO:0000123//GO:0005770//GO:0005634	histone acetyltransferase complex//late endosome//nucleus	--	--	DOWN	-1.0155	4.6051e-19	blast,frame:-1 start:2206 end:782
Cluster-3181.30911-2F	Others	Others	Cluster-3181.30911	1219171861	XP_021749547.1	533	4.3e-52	paired amphipathic helix protein Sin3-like 2 isoform X2 [Chenopodium quinoa]	XM_021991411.1	XM_021991411	234	4.13646e-118	PREDICTED: Spinacia oleracea paired amphipathic helix protein Sin3-like 2 (LOC110786835), mRNA	K11644	SIN3A	paired amphipathic helix protein Sin3a	http://www.genome.jp/dbget-bin/www_bget?ko:K11644	Q9LFQ3	366	3.8e-34	Paired amphipathic helix protein Sin3-like 2 OS=Arabidopsis thaliana OX=3702 GN=SNL2 PE=1 SV=2	PF02671	Paired amphipathic helix repeat	GO:0006355	regulation of transcription, DNA-templated	--	--	--	--	KOG4204	Histone deacetylase complex, SIN3 component	UP	1.204	0.011033	--
Cluster-3181.31313-1F	MYB-related	MYB->MYB-related	Cluster-3181.31313	1219165842	XP_021746552.1	269	1.9e-21	SWI/SNF complex subunit SWI3B-like [Chenopodium quinoa]	XM_021862087.1	XM_021862087	185	7.64767e-91	PREDICTED: Chenopodium quinoa SWI/SNF complex subunit SWI3B (LOC110685545), mRNA	K11649	SMARCC	SWI/SNF related-matrix-associated actin-dependent regulator of chromatin subfamily C	http://www.genome.jp/dbget-bin/www_bget?ko:K11649	Q84JG2	164	1.1e-10	SWI/SNF complex subunit SWI3B OS=Arabidopsis thaliana OX=3702 GN=SWI3B PE=1 SV=1	--	--	--	--	--	--	--	--	--	--	DOWN	-3.7867	0.0437	--
Cluster-3181.31636-0R	WRKY	WRKY	Cluster-3181.31636	870867222	KMT18115.1	373	4.6e-33	hypothetical protein BVRB_2g031460 [Beta vulgaris subsp. vulgaris]	XM_010669209.2	XM_010669209	165	2.97377e-79	PREDICTED: Beta vulgaris subsp. vulgaris probable WRKY transcription factor 40 (LOC104884530), mRNA	--	--	--	--	Q6IEK5	260	2.2e-21	WRKY transcription factor WRKY76 OS=Oryza sativa subsp. indica OX=39946 GN=WRKY76 PE=2 SV=1	PF03106	WRKY DNA -binding domain	GO:0006355	regulation of transcription, DNA-templated	GO:0003700//GO:0043565	DNA-binding transcription factor activity//sequence-specific DNA binding	GO:0005667	transcription regulator complex	--	--	UP	7.1774	5.5926e-08	--
Cluster-3181.31660-1F	C3H	C3H	Cluster-3181.31660	1219135731	XP_021731198.1	516	1.5e-49	zinc finger CCCH domain-containing protein 48-like [Chenopodium quinoa]	XM_019252191.1	XM_019252191	56	1.4719e-18	PREDICTED: Beta vulgaris subsp. vulgaris zinc finger CCCH domain-containing protein 48 (LOC104905489), mRNA	K10260	FBXW7, SEL10	F-box and WD-40 domain protein 7	http://www.genome.jp/dbget-bin/www_bget?ko:K10260	Q9FNZ2	133	1.5e-06	Zinc finger CCCH domain-containing protein 48 OS=Arabidopsis thaliana OX=3702 GN=ZFWD1 PE=2 SV=1	PF00642	Zinc finger C-x8-C-x5-C-x3-H type (and similar)	--	--	GO:0046872	metal ion binding	--	--	--	--	UP	1.628	3.0641e-90	--
Cluster-3181.34020-2R	AP2/ERF-ERF	AP2/ERF->AP2/ERF-ERF	Cluster-3181.34020	910752140	AKU47817.1	1514	3.9e-165	dehydration responsive element binding transcription factor 2A [Haloxylon ammodendron]	KP765243.1	KP765243	957	0	Haloxylon ammodendron dehydration responsive element binding transcription factor 2A (DREB2A) mRNA, complete cds	--	--	--	--	Q8LFR2	292	7.4e-25	Dehydration-responsive element-binding protein 2C OS=Arabidopsis thaliana OX=3702 GN=DREB2C PE=2 SV=2	PF03229//PF00847	Alphavirus glycoprotein J//AP2 domain	GO:0019050//GO:0006355	suppression by virus of host apoptotic process//regulation of transcription, DNA-templated	GO:0003700	DNA-binding transcription factor activity	GO:0005667	transcription regulator complex	--	--	DOWN	-2.3472	6.0056e-115	blast,frame:-3 start:1542 end:451
Cluster-3181.34312-1R	AP2/ERF-ERF	AP2/ERF->AP2/ERF-ERF	Cluster-3181.34312	1219120566	XP_021723580.1	481	2.5e-45	ethylene-responsive transcription factor TINY-like [Chenopodium quinoa]	XM_021885759.1	XM_021885759	245	1.87441e-123	PREDICTED: Chenopodium quinoa ethylene-responsive transcription factor TINY-like (LOC110707720), mRNA	K09286	EREBP	EREBP-like factor	http://www.genome.jp/dbget-bin/www_bget?ko:K09286	O80654	395	9e-37	Ethylene-responsive transcription factor ERF037 OS=Arabidopsis thaliana OX=3702 GN=ERF037 PE=2 SV=1	PF00847	AP2 domain	GO:0006355	regulation of transcription, DNA-templated	GO:0003700	DNA-binding transcription factor activity	GO:0005667	transcription regulator complex	--	--	UP	1.478	3.8535e-79	blast,frame:-2 start:2074 end:1190
Cluster-3181.3434-0F	SWI/SNF-BAF60b	SWI/SNF-BAF60b	Cluster-3181.3434	223536700	EEF38341.1	152	9.7e-08	brg-1 associated factor, putative [Ricinus communis]	--	--	--	--	--	--	--	--	--	--	--	--	--	PF04131//PF02201	Putative N-acetylmannosamine-6-phosphate epimerase//SWIB/MDM2 domain	GO:0006051//GO:0006040	N-acetylmannosamine metabolic process//amino sugar metabolic process	GO:0005515//GO:0047465	protein binding//N-acylglucosamine-6-phosphate 2-epimerase activity	--	--	--	--	UP	8.4754	1.6631e-10	blast,frame:1 start:214 end:369
Cluster-3181.34538-1F	AP2/ERF-ERF	AP2/ERF->AP2/ERF-ERF	Cluster-3181.34538	870869541	KMT20286.1	632	4.1e-63	hypothetical protein BVRB_1g002890 [Beta vulgaris subsp. vulgaris]	--	--	--	--	--	K09286	EREBP	EREBP-like factor	http://www.genome.jp/dbget-bin/www_bget?ko:K09286	Q1ECI2	409	1.1e-38	Ethylene-responsive transcription factor ERF023 OS=Arabidopsis thaliana OX=3702 GN=ERF023 PE=2 SV=1	PF00847	AP2 domain	GO:0006355	regulation of transcription, DNA-templated	GO:0003700	DNA-binding transcription factor activity	GO:0005667	transcription regulator complex	--	--	DOWN	-4.1666	5.4607e-58	blast,frame:2 start:143 end:757
Cluster-3181.35668-1F	MYB	MYB->MYB	Cluster-3181.35668	1226836266	XP_021866678.1	2290	1.3e-254	uncharacterized protein LOC110805390 [Spinacia oleracea]	XM_022010986.1	XM_022010986	872	0	PREDICTED: Spinacia oleracea uncharacterized LOC110805390 (LOC110805390), mRNA	--	--	--	--	Q9LSI7	659	6.7e-67	Transcription factor MYB35 OS=Arabidopsis thaliana OX=3702 GN=MYB35 PE=2 SV=1	PF03171//PF00376//PF09111//PF13640	2OG-Fe(II) oxygenase superfamily//MerR family regulatory protein//SLIDE//2OG-Fe(II) oxygenase superfamily	GO:0006355//GO:0006338//GO:0055114	regulation of transcription, DNA-templated//chromatin remodeling//oxidation-reduction process	GO:0016818//GO:0003677//GO:0003676//GO:0005524//GO:0016491	hydrolase activity, acting on acid anhydrides, in phosphorus-containing anhydrides//DNA binding//nucleic acid binding//ATP binding//oxidoreductase activity	GO:0005634	nucleus	--	--	UP	1.0713	3.4343e-35	blast,frame:-3 start:6332 end:4557
Cluster-3181.36988-0F	SET	SET	Cluster-3181.36988	1219088741	XP_021770558.1	1526	1.9e-166	protein PLASTID TRANSCRIPTIONALLY ACTIVE 14-like [Chenopodium quinoa]	XM_022001332.1	XM_022001332	635	0	PREDICTED: Spinacia oleracea protein PLASTID TRANSCRIPTIONALLY ACTIVE 14 (LOC110796283), transcript variant X2, mRNA	--	--	--	--	Q84JF5	1206	9.3e-131	Protein PLASTID TRANSCRIPTIONALLY ACTIVE 14 OS=Arabidopsis thaliana OX=3702 GN=PTAC14 PE=1 SV=1	PF00856//PF06420	SET domain//Mitochondrial genome maintenance MGM101	GO:0006281//GO:0000002	DNA repair//mitochondrial genome maintenance	GO:0005515//GO:0003697	protein binding//single-stranded DNA binding	GO:0000262	mitochondrial chromosome	--	--	DOWN	-1.1735	5.8032e-13	blast,frame:1 start:22 end:1257
Cluster-3181.37227-1R	NAC	NAC	Cluster-3181.37227	731311043	XP_010686990.1	762	3.5e-78	PREDICTED: NAC domain-containing protein 8 [Beta vulgaris subsp. vulgaris]	XM_010688688.2	XM_010688688	146	1.05009e-68	PREDICTED: Beta vulgaris subsp. vulgaris NAC domain-containing protein 8 (LOC104901118), mRNA	--	--	--	--	Q6NQK2	310	3.4e-27	SUPPRESSOR OF GAMMA RESPONSE 1 OS=Arabidopsis thaliana OX=3702 GN=SOG1 PE=1 SV=1	PF02365	No apical meristem (NAM) protein	GO:0006355	regulation of transcription, DNA-templated	GO:0003677	DNA binding	--	--	--	--	UP	1.3694	0.048013	--
Cluster-3181.3776-2R	bHLH	bHLH	Cluster-3181.3776	1219082580	XP_021767443.1	561	1.3e-54	transcription factor PIF1-like [Chenopodium quinoa]	XM_021907742.1	XM_021907742	257	3.89079e-130	PREDICTED: Chenopodium quinoa transcription factor PIF1-like (LOC110728106), transcript variant X2, mRNA	--	--	--	--	Q8GZM7	282	1.1e-23	Transcription factor PIF1 OS=Arabidopsis thaliana OX=3702 GN=PIF1 PE=1 SV=1	PF10152//PF05279//PF00010//PF05841//PF05843//PF07859	Subunit CCDC53 of WASH complex//Aspartyl beta-hydroxylase N-terminal region//Helix-loop-helix DNA-binding domain//Apc15p protein//Suppressor of forked protein (Suf)//alpha/beta hydrolase fold	GO:0030071//GO:0006397//GO:0031145	regulation of mitotic metaphase/anaphase transition//mRNA processing//anaphase-promoting complex-dependent catabolic process	GO:0046983//GO:0016787	protein dimerization activity//hydrolase activity	GO:0016020//GO:0005634//GO:0005680//GO:0071203	membrane//nucleus//anaphase-promoting complex//WASH complex	--	--	UP	2.8671	1.9344e-08	blast,frame:-3 start:1984 end:956|blast,frame:-2 start:932 end:306
Cluster-3181.38300-0R	HSF	HSF	Cluster-3181.38300	1219150983	XP_021738979.1	1001	1.7e-105	heat shock factor protein HSF30-like isoform X1 [Chenopodium quinoa]	XM_021883288.1	XM_021883288	441	0	PREDICTED: Chenopodium quinoa heat shock factor protein HSF30-like (LOC110705424), transcript variant X2, mRNA	K09419	HSFF	heat shock transcription factor, other eukaryote	http://www.genome.jp/dbget-bin/www_bget?ko:K09419	P41152	560	8.8e-56	Heat shock factor protein HSF30 OS=Solanum peruvianum OX=4082 GN=HSF30 PE=2 SV=1	PF00447//PF15347//PF09726	HSF-type DNA-binding//Phosphoprotein associated with glycosphingolipid-enriched//Macoilin family	GO:0023041//GO:0006355//GO:0050868//GO:0035556	neuronal signal transduction//regulation of transcription, DNA-templated//negative regulation of T cell activation//intracellular signal transduction	GO:0003700//GO:0043565	DNA-binding transcription factor activity//sequence-specific DNA binding	GO:0030867//GO:0045121//GO:0005667//GO:0005886//GO:0042025	rough endoplasmic reticulum membrane//membrane raft//transcription regulator complex//plasma membrane//host cell nucleus	--	--	UP	1.5237	1.0417e-26	blast,frame:-1 start:2209 end:1325
Cluster-3181.39650-1F	bHLH	bHLH	Cluster-3181.39650	1219056248	XP_021753849.1	347	5.3e-30	transcription factor bHLH118-like [Chenopodium quinoa]	--	--	--	--	--	--	--	--	--	Q9STJ7	181	3.6e-12	Transcription factor bHLH118 OS=Arabidopsis thaliana OX=3702 GN=BHLH118 PE=2 SV=1	PF00010//PF01496	Helix-loop-helix DNA-binding domain//V-type ATPase 116kDa subunit family	GO:1902600	proton transmembrane transport	GO:0015078//GO:0046983	proton transmembrane transporter activity//protein dimerization activity	GO:0033179	proton-transporting V-type ATPase, V0 domain	--	--	DOWN	-2.4519	1.9336e-07	blast,frame:2 start:2 end:907
Cluster-3181.4274-2F	NAC	NAC	Cluster-3181.4274	1052230984	AOC59215.1	736	5.2e-75	NAC transcription factor 42 [Haloxylon ammodendron]	KU845323.1	KU845323	572	0	Haloxylon ammodendron NAC transcription factor 42 mRNA, complete cds	--	--	--	--	Q8GWK6	462	1.2e-44	NAC domain-containing protein 104 OS=Arabidopsis thaliana OX=3702 GN=NAC104 PE=2 SV=1	PF02365	No apical meristem (NAM) protein	GO:0006355	regulation of transcription, DNA-templated	GO:0003677	DNA binding	--	--	--	--	UP	1.7292	6.2709e-28	blast,frame:3 start:258 end:752|blast,frame:1 start:1150 end:1296
Cluster-3181.43532-2R	C2H2	C2H2	Cluster-3181.43532	870847674	KMT00022.1	351	2.3e-30	hypothetical protein BVRB_1g018520 [Beta vulgaris subsp. vulgaris]	XM_021993608.1	XM_021993608	62	7.79519e-22	PREDICTED: Spinacia oleracea zinc finger protein ZAT9-like (LOC110788970), mRNA	--	--	--	--	Q9M202	302	4.3e-26	Zinc finger protein ZAT9 OS=Arabidopsis thaliana OX=3702 GN=ZAT9 PE=2 SV=1	PF05499//PF00096	DNA methyltransferase 1-associated protein 1 (DMAP1)//Zinc finger, C2H2 type	GO:0045892	negative regulation of transcription, DNA-templated	GO:0003676	nucleic acid binding	GO:0005634	nucleus	--	--	UP	1.3275	2.5848e-07	blast,frame:-3 start:1357 end:74
Cluster-3181.5552-1R	AP2/ERF-ERF	AP2/ERF->AP2/ERF-ERF	Cluster-3181.5552	870855216	KMT06949.1	613	5.9e-61	hypothetical protein BVRB_6g152840 [Beta vulgaris subsp. vulgaris]	XM_021885487.1	XM_021885487	233	4.07481e-117	PREDICTED: Chenopodium quinoa ethylene-responsive transcription factor ERF021-like (LOC110707473), mRNA	--	--	--	--	Q9LQ28	372	2e-34	Ethylene-responsive transcription factor ERF022 OS=Arabidopsis thaliana OX=3702 GN=ERF022 PE=2 SV=1	PF00847	AP2 domain	GO:0006355	regulation of transcription, DNA-templated	GO:0003700	DNA-binding transcription factor activity	GO:0005667	transcription regulator complex	--	--	DOWN	-4.034	1.5792e-08	blast,frame:-2 start:980 end:369
Cluster-3181.6235-0R	S1Fa-like	S1Fa-like	Cluster-3181.6235	1219164766	XP_021746013.1	143	2e-06	DNA-binding protein S1FA [Chenopodium quinoa]	XM_021890321.1	XM_021890321	190	3.55949e-93	PREDICTED: Chenopodium quinoa DNA-binding protein S1FA (LOC110711877), mRNA	--	--	--	--	P42552	142	1e-07	DNA-binding protein S1FA OS=Spinacia oleracea OX=3562 GN=S1FA PE=3 SV=1	PF04689	DNA binding protein S1FA	GO:0006355	regulation of transcription, DNA-templated	GO:0003677	DNA binding	GO:0005634	nucleus	--	--	UP	1.3471	5.2597e-43	blast,frame:-1 start:869 end:525
Cluster-3181.6959-0R	WRKY	WRKY	Cluster-3181.6959	731372976	XP_010666507.1	654	1.7e-65	PREDICTED: probable WRKY transcription factor 71 [Beta vulgaris subsp. vulgaris]	XM_010668205.2	XM_010668205	313	2.23893e-161	PREDICTED: Beta vulgaris subsp. vulgaris probable WRKY transcription factor 71 (LOC104883655), mRNA	--	--	--	--	Q93WV4	417	1.9e-39	WRKY transcription factor 71 OS=Arabidopsis thaliana OX=3702 GN=WRKY71 PE=2 SV=1	PF03106	WRKY DNA -binding domain	GO:0006355	regulation of transcription, DNA-templated	GO:0043565//GO:0003700	sequence-specific DNA binding//DNA-binding transcription factor activity	GO:0005667	transcription regulator complex	--	--	DOWN	-1.1182	2.5127e-08	blast,frame:-1 start:1353 end:199
Cluster-3181.6964-0F	FAR1	FAR1	Cluster-3181.6964	1226829556	XP_021863936.1	1852	6.1e-204	protein FAR1-RELATED SEQUENCE 5-like [Spinacia oleracea]	XM_022005908.1	XM_022005908	682	0	PREDICTED: Spinacia oleracea protein FAR1-RELATED SEQUENCE 5-like (LOC110800596), mRNA	--	--	--	--	Q9LIE5	573	4.7e-57	Protein FAR-RED ELONGATED HYPOCOTYL 3 OS=Arabidopsis thaliana OX=3702 GN=FHY3 PE=1 SV=1	PF00872//PF08043//PF04434	Transposase, Mutator family//Xin repeat//SWIM zinc finger	GO:0006313//GO:0030036	transposition, DNA-mediated//actin cytoskeleton organization	GO:0004803//GO:0003677//GO:0003779//GO:0008270	transposase activity//DNA binding//actin binding//zinc ion binding	GO:0030054	cell junction	--	--	DOWN	-4.7579	5.2525e-20	blast,frame:3 start:3168 end:4718
Cluster-3181.7950-2R	GRF	GRF	Cluster-3181.7950	902145317	KNA04964.1	538	9.5e-52	hypothetical protein SOVF_194750 [Spinacia oleracea]	XM_021897057.1	XM_021897057	204	1.78899e-100	PREDICTED: Chenopodium quinoa growth-regulating factor 5-like (LOC110718234), transcript variant X1, mRNA	--	--	--	--	Q6AWY8	369	1.4e-33	Growth-regulating factor 1 OS=Oryza sativa subsp. japonica OX=39947 GN=GRF1 PE=3 SV=1	PF08880	QLQ	GO:0006355	regulation of transcription, DNA-templated	GO:0005524	ATP binding	GO:0005634	nucleus	--	--	UP	1.1762	9.2379e-09	blast,frame:-3 start:2910 end:2233
Cluster-3181.8434-1R	MYB	MYB->MYB	Cluster-3181.8434	1219056785	XP_021754127.1	1770	1e-194	transcription factor MYB3R-5-like [Chenopodium quinoa]	XM_021898435.1	XM_021898435	555	0	PREDICTED: Chenopodium quinoa transcription factor MYB3R-5-like (LOC110719481), mRNA	--	--	--	--	Q94FL9	698	7.9e-72	Transcription factor MYB3R-4 OS=Arabidopsis thaliana OX=3702 GN=MYB3R4 PE=1 SV=1	PF09111//PF00616	SLIDE//GTPase-activator protein for Ras-like GTPase	GO:0043087//GO:0006338	regulation of GTPase activity//chromatin remodeling	GO:0016818//GO:0005524//GO:0003676	hydrolase activity, acting on acid anhydrides, in phosphorus-containing anhydrides//ATP binding//nucleic acid binding	GO:0005634	nucleus	KOG0048	Transcription factor, Myb superfamily	UP	3.8291	1.0992e-76	blast,frame:-2 start:2327 end:726
Cluster-3181.8438-0R	WRKY	WRKY	Cluster-3181.8438	1219071556	XP_021761746.1	701	1.9e-70	ABC transporter A family member 9-like [Chenopodium quinoa]	--	--	--	--	--	--	--	--	--	Q8GWF1	141	6.2e-07	Probable WRKY transcription factor 38 OS=Arabidopsis thaliana OX=3702 GN=WRKY38 PE=1 SV=1	PF03106	WRKY DNA -binding domain	GO:0006355	regulation of transcription, DNA-templated	GO:0003700//GO:0043565	DNA-binding transcription factor activity//sequence-specific DNA binding	GO:0005667	transcription regulator complex	--	--	DOWN	-1.826	1.7879e-16	blast,frame:-2 start:734 end:3
Cluster-3181.9674-1R	B3	B3->B3	Cluster-3181.9674	1108974495	XP_019107213.1	335	1.2e-28	PREDICTED: B3 domain-containing protein At4g34400-like [Beta vulgaris subsp. vulgaris]	--	--	--	--	--	--	--	--	--	Q9FGD2	195	7.6e-14	Putative B3 domain-containing protein At5g66980 OS=Arabidopsis thaliana OX=3702 GN=At5g66980 PE=1 SV=1	PF02362	B3 DNA binding domain	--	--	GO:0003677	DNA binding	--	--	--	--	DOWN	-1.4141	0.013606	blast,frame:-2 start:817 end:371
Cluster-3181.9923-0F	AP2/ERF-ERF	AP2/ERF->AP2/ERF-ERF	Cluster-3181.9923	731310543	XP_010670581.1	433	6.5e-40	PREDICTED: ethylene-responsive transcription factor ERF014 [Beta vulgaris subsp. vulgaris]	XM_010672279.2	XM_010672279	144	1.81631e-67	PREDICTED: Beta vulgaris subsp. vulgaris ethylene-responsive transcription factor ERF014 (LOC104887356), mRNA	--	--	--	--	Q9LPE8	245	1.6e-19	Ethylene-responsive transcription factor ERF014 OS=Arabidopsis thaliana OX=3702 GN=ERF014 PE=2 SV=1	PF00847//PF09026	AP2 domain//Centromere protein B dimerisation domain	GO:0006355	regulation of transcription, DNA-templated	GO:0003677//GO:0003682//GO:0003700	DNA binding//chromatin binding//DNA-binding transcription factor activity	GO:0000775//GO:0005667//GO:0000785//GO:0005634	chromosome, centromeric region//transcription regulator complex//chromatin//nucleus	--	--	UP	1.0584	0.0002685	blast,frame:1 start:118 end:1020
Cluster-4702.0-2R	WRKY	WRKY	Cluster-4702.0	1219063246	XP_021757516.1	713	1.6e-72	probable WRKY transcription factor 56 [Chenopodium quinoa]	XM_022011216.1	XM_022011216	232	1.6047e-116	PREDICTED: Spinacia oleracea probable WRKY transcription factor 12 (LOC110805596), mRNA	--	--	--	--	Q8VWQ4	440	2.8e-42	Probable WRKY transcription factor 56 OS=Arabidopsis thaliana OX=3702 GN=WRKY56 PE=2 SV=1	PF03106	WRKY DNA -binding domain	GO:0006355	regulation of transcription, DNA-templated	GO:0043565//GO:0003700	sequence-specific DNA binding//DNA-binding transcription factor activity	GO:0005667	transcription regulator complex	--	--	DOWN	-2.7832	0.0087421	blast,frame:-3 start:1069 end:209
Cluster-5991.0-2R	MADS-M-type	MADS->MADS-M-type	Cluster-5991.0	870863097	KMT14274.1	476	2.9e-45	hypothetical protein BVRB_4g076300 [Beta vulgaris subsp. vulgaris]	XM_010675806.1	XM_010675806	176	1.2607e-85	PREDICTED: Beta vulgaris subsp. vulgaris agamous-like MADS-box protein AGL80 (LOC104890354), mRNA	--	--	--	--	Q9FJK3	342	3.9e-31	Agamous-like MADS-box protein AGL80 OS=Arabidopsis thaliana OX=3702 GN=AGL80 PE=1 SV=1	PF00319	SRF-type transcription factor (DNA-binding and dimerisation domain)	--	--	GO:0046983//GO:0003677	protein dimerization activity//DNA binding	--	--	--	--	UP	3.0151	0.00014505	blast,frame:-3 start:634 end:134
Cluster-7504.0-0R	C2H2	C2H2	Cluster-7504.0	1219128312	XP_021727486.1	992	7.1e-105	zinc finger protein 511-like isoform X1 [Chenopodium quinoa]	XM_022008062.1	XM_022008062	367	0	PREDICTED: Spinacia oleracea zinc finger protein 511 (LOC110802617), mRNA	--	--	--	--	Q7ZZ00	320	2.3e-28	Zinc finger protein 511 OS=Danio rerio OX=7955 GN=znf511 PE=2 SV=1	PF00096//PF07989	Zinc finger, C2H2 type//Centrosomin N-terminal motif 1	--	--	GO:0003676	nucleic acid binding	GO:0005815	microtubule organizing center	KOG4173	Alpha-SNAP protein	UP	1.0317	0.001525	blast,frame:-1 start:976 end:197
Cluster-10994.0-0R	FAR1	FAR1	Cluster-10994.0	731313068	XP_010677693.1	388	1.6e-34	PREDICTED: protein FAR-RED IMPAIRED RESPONSE 1-like [Beta vulgaris subsp. vulgaris]	--	--	--	--	--	--	--	--	--	--	--	--	--	--	--	--	--	--	--	--	--	--	--	DOWN	-1.9778	0.011982	blast,frame:-1 start:1399 end:836
Cluster-11050.0-2F	MADS-MIKC	MADS->MADS-MIKC	Cluster-11050.0	731351705	XP_010687169.1	1043	8.5e-111	PREDICTED: floral homeotic protein AGAMOUS isoform X1 [Beta vulgaris subsp. vulgaris]	XM_021867754.1	XM_021867754	530	0	PREDICTED: Chenopodium quinoa floral homeotic protein AGAMOUS-like (LOC110690864), transcript variant X1, mRNA	K09264	K09264	MADS-box transcription factor, plant	http://www.genome.jp/dbget-bin/www_bget?ko:K09264	Q40872	777	2.3e-81	Floral homeotic protein AGAMOUS OS=Panax ginseng OX=4054 GN=AG2 PE=2 SV=1	PF00319//PF01486//PF04428	SRF-type transcription factor (DNA-binding and dimerisation domain)//K-box region//Choline kinase N terminus	GO:0006355	regulation of transcription, DNA-templated	GO:0003677//GO:0003700//GO:0046983//GO:0016773	DNA binding//DNA-binding transcription factor activity//protein dimerization activity//phosphotransferase activity, alcohol group as acceptor	GO:0005667//GO:0005634	transcription regulator complex//nucleus	--	--	UP	2.954	0.023109	blast,frame:3 start:123 end:887
Cluster-11703.0-0R	MYB	MYB->MYB	Cluster-11703.0	1226778225	XP_021846467.1	592	4.6e-58	uncharacterized protein LOC110786241 [Spinacia oleracea]	--	--	--	--	--	K09422	MYBP	myb proto-oncogene protein, plant	http://www.genome.jp/dbget-bin/www_bget?ko:K09422	P10242	155	8.2e-09	Transcriptional activator Myb OS=Homo sapiens OX=9606 GN=MYB PE=1 SV=2	PF04790//PF04663//PF07655//PF09111	Sarcoglycan complex subunit protein//Phenol hydroxylase conserved region//Secretin N-terminal domain//SLIDE	GO:0019497//GO:0006338//GO:0042184//GO:0042203//GO:0009297//GO:0018916	hexachlorocyclohexane metabolic process//chromatin remodeling//xylene catabolic process//toluene catabolic process//pilus assembly//nitrobenzene metabolic process	GO:0018662//GO:0016818//GO:0003676//GO:0005524	phenol 2-monooxygenase activity//hydrolase activity, acting on acid anhydrides, in phosphorus-containing anhydrides//nucleic acid binding//ATP binding	GO:0019867//GO:0016021//GO:0016012//GO:0005634	outer membrane//integral component of membrane//sarcoglycan complex//nucleus	--	--	UP	5.0622	6.7856e-47	blast,frame:-3 start:1943 end:105
Cluster-12042.0-0R	Trihelix	Trihelix	Cluster-12042.0	1219159596	XP_021743338.1	1498	3.2e-163	trihelix transcription factor PTL-like [Chenopodium quinoa]	XM_010685560.2	XM_010685560	481	0	PREDICTED: Beta vulgaris subsp. vulgaris trihelix transcription factor PTL (LOC104898473), transcript variant X2, mRNA	--	--	--	--	Q9LZS0	742	5.5e-77	Trihelix transcription factor PTL OS=Arabidopsis thaliana OX=3702 GN=PTL PE=1 SV=1	PF10717//PF06687	Occlusion-derived virus envelope protein ODV-E18//SUR7/PalI family	--	--	--	--	GO:0019031//GO:0005886	viral envelope//plasma membrane	--	--	DOWN	-1.8356	0.0015937	blast,frame:-1 start:2065 end:110
Cluster-12960.0-0R	B3	B3->B3	Cluster-12960.0	731358969	XP_010691035.1	384	3.3e-34	PREDICTED: B3 domain-containing protein At3g19184 [Beta vulgaris subsp. vulgaris]	XM_021884970.1	XM_021884970	61	2.67554e-21	PREDICTED: Chenopodium quinoa B3 domain-containing protein At5g42700-like (LOC110706959), mRNA	--	--	--	--	Q10QS9	295	2.6e-25	B3 domain-containing protein Os03g0184500 OS=Oryza sativa subsp. japonica OX=39947 GN=Os03g0184500 PE=2 SV=1	PF02362//PF00036//PF13405	B3 DNA binding domain//EF hand//EF-hand domain	--	--	GO:0005509//GO:0003677	calcium ion binding//DNA binding	--	--	--	--	UP	2.1371	1.8114e-11	--
Cluster-13799.0-2R	DBB	DBB	Cluster-13799.0	870848084	KMT00373.1	688	1.5e-69	hypothetical protein BVRB_9g216790 isoform B [Beta vulgaris subsp. vulgaris]	XM_010692495.2	XM_010692495	254	1.07302e-128	PREDICTED: Beta vulgaris subsp. vulgaris B-box zinc finger protein 20 (LOC104904288), mRNA	--	--	--	--	Q0IGM7	499	4.6e-49	B-box zinc finger protein 20 OS=Arabidopsis thaliana OX=3702 GN=BBX20 PE=1 SV=1	PF00643//PF00130//PF01667//PF09261	B-box zinc finger//Phorbol esters/diacylglycerol binding domain (C1 domain)//Ribosomal protein S27//Alpha mannosidase middle domain	GO:0035556//GO:0042254//GO:0006412//GO:0005975//GO:0006013	intracellular signal transduction//ribosome biogenesis//translation//carbohydrate metabolic process//mannose metabolic process	GO:0008270//GO:0004559//GO:0003735	zinc ion binding//alpha-mannosidase activity//structural constituent of ribosome	GO:0005840	ribosome	--	--	UP	3.2716	2.4236e-06	blast,frame:-3 start:978 end:328
Cluster-3181.10569-2F	AP2/ERF-ERF	AP2/ERF->AP2/ERF-ERF	Cluster-3181.10569	1219126277	XP_021726490.1	438	1.2e-40	ethylene-responsive transcription factor 12-like [Chenopodium quinoa]	CP025652.1	CP025652	71	4.80882e-27	Ipomoea trifida cultivar NCNSP0306 chromosome 9	--	--	--	--	Q94ID6	323	9.8e-29	Ethylene-responsive transcription factor 12 OS=Arabidopsis thaliana OX=3702 GN=ERF12 PE=1 SV=1	PF00847	AP2 domain	GO:0006355	regulation of transcription, DNA-templated	GO:0003700	DNA-binding transcription factor activity	GO:0005667	transcription regulator complex	--	--	DOWN	-3.9884	4.2664e-12	blast,frame:3 start:108 end:677
Cluster-3181.107-0F	CAMTA	CAMTA	Cluster-3181.107	731338853	XP_010680539.1	2832	0	PREDICTED: calmodulin-binding transcription activator 3 isoform X1 [Beta vulgaris subsp. vulgaris]	XM_019250176.1	XM_019250176	888	0	PREDICTED: Beta vulgaris subsp. vulgaris calmodulin-binding transcription activator 3 (LOC104895670), transcript variant X2, mRNA	K21596	-	-	http://www.genome.jp/dbget-bin/www_bget?ko:K21596	Q8GSA7	1278	6.6e-139	Calmodulin-binding transcription activator 3 OS=Arabidopsis thaliana OX=3702 GN=CAMTA3 PE=1 SV=1	PF03859//PF00612//PF13606//PF00023	CG-1 domain//IQ calmodulin-binding motif//Ankyrin repeat//Ankyrin repeat	--	--	GO:0005515//GO:0003677	protein binding//DNA binding	--	--	KOG0520	Uncharacterized conserved protein, contains IPT/TIG domain	UP	1.5227	9.7473e-14	blast,frame:1 start:388 end:3216|blast,frame:2 start:2 end:370
Cluster-3181.10956-2F	HB-BELL	HB->HB-BELL	Cluster-3181.10956	1219151081	XP_021739030.1	1805	1e-198	homeobox protein ATH1-like [Chenopodium quinoa]	XM_021883338.1	XM_021883338	714	0	PREDICTED: Chenopodium quinoa homeobox protein ATH1-like (LOC110705456), transcript variant X2, mRNA	--	--	--	--	P48731	652	2e-66	Homeobox protein ATH1 OS=Arabidopsis thaliana OX=3702 GN=ATH1 PE=1 SV=1	PF00046//PF05920	Homeodomain//Homeobox KN domain	GO:0006355	regulation of transcription, DNA-templated	GO:0003677	DNA binding	--	--	--	--	DOWN	-2.6784	1.253e-24	blast,frame:3 start:732 end:2555
Cluster-3181.11575-2R	C2C2-YABBY	C2C2->C2C2-YABBY	Cluster-3181.11575	1219060943	XP_021756313.1	808	2.2e-83	axial regulator YABBY 1-like [Chenopodium quinoa]	XM_021892916.1	XM_021892916	409	0	PREDICTED: Chenopodium quinoa axial regulator YABBY 1-like (LOC110714407), mRNA	--	--	--	--	O22152	560	4.8e-56	Axial regulator YABBY 1 OS=Arabidopsis thaliana OX=3702 GN=YAB1 PE=1 SV=1	PF04690	YABBY protein	GO:0007275	multicellular organism development	--	--	--	--	--	--	DOWN	-1.8615	1.0632e-09	blast,frame:-3 start:1098 end:304
Cluster-3181.1164-0R	MYB-related	MYB->MYB-related	Cluster-3181.1164	1226818384	XP_021858430.1	551	2.9e-53	uncharacterized protein LOC110797633 [Spinacia oleracea]	XM_022002738.1	XM_022002738	246	7.8148e-124	PREDICTED: Spinacia oleracea uncharacterized LOC110797633 (LOC110797633), transcript variant X4, mRNA	K09422	MYBP	myb proto-oncogene protein, plant	http://www.genome.jp/dbget-bin/www_bget?ko:K09422	Q54NA6	182	6.7e-12	Myb-like protein L OS=Dictyostelium discoideum OX=44689 GN=mybL PE=3 SV=1	PF09494//PF10185	Slx4 endonuclease//Chaperone for wingless signalling and trafficking of LDL receptor	GO:0006308//GO:0006457//GO:0006281//GO:0006260	DNA catabolic process//protein folding//DNA repair//DNA replication	GO:0017108	5'-flap endonuclease activity	GO:0033557//GO:0005634	Slx1-Slx4 complex//nucleus	--	--	UP	6.2803	9.7626e-22	--
Cluster-3181.12694-1R	HB-WOX	HB->HB-WOX	Cluster-3181.12694	731314854	XP_010688717.1	865	5.3e-90	PREDICTED: WUSCHEL-related homeobox 4 isoform X1 [Beta vulgaris subsp. vulgaris]	XM_021866878.1	XM_021866878	279	1.65651e-142	PREDICTED: Chenopodium quinoa WUSCHEL-related homeobox 4-like (LOC110690049), transcript variant X2, mRNA	--	--	--	--	Q6X7J9	518	3.5e-51	WUSCHEL-related homeobox 4 OS=Arabidopsis thaliana OX=3702 GN=WOX4 PE=1 SV=1	PF00046	Homeodomain	--	--	GO:0003677	DNA binding	--	--	--	--	DOWN	-2.2496	2.1023e-44	blast,frame:-2 start:1405 end:542
Cluster-3181.13494-1R	Others	Others	Cluster-3181.13494	1219096431	XP_021774463.1	789	3.6e-81	two-component response regulator ORR10-like [Chenopodium quinoa]	XM_021897234.1	XM_021897234	308	1.31915e-158	PREDICTED: Chenopodium quinoa two-component response regulator ORR10-like (LOC110718397), mRNA	K14492	ARR-A	two-component response regulator ARR-A family	http://www.genome.jp/dbget-bin/www_bget?ko:K14492	B8BLZ4	512	1.8e-50	Two-component response regulator ORR10 OS=Oryza sativa subsp. indica OX=39946 GN=RR10 PE=2 SV=1	PF00072	Response regulator receiver domain	GO:0000160	phosphorelay signal transduction system	--	--	--	--	--	--	DOWN	-1.6211	6.8877e-53	blast,frame:-2 start:1543 end:911|blast,frame:-3 start:867 end:760
Cluster-3181.16415-2F	MADS-M-type	MADS->MADS-M-type	Cluster-3181.16415	1219169501	XP_021748345.1	465	9.4e-44	MADS-box protein SOC1-like isoform X2 [Chenopodium quinoa]	XM_021892653.1	XM_021892653	222	5.85729e-111	PREDICTED: Chenopodium quinoa MADS-box protein SOC1-like (LOC110714174), transcript variant X3, mRNA	--	--	--	--	O64645	359	7e-33	MADS-box protein SOC1 OS=Arabidopsis thaliana OX=3702 GN=SOC1 PE=1 SV=1	PF00319	SRF-type transcription factor (DNA-binding and dimerisation domain)	--	--	GO:0003677//GO:0046983	DNA binding//protein dimerization activity	--	--	--	--	DOWN	-1.0029	9.5521e-17	--
Cluster-3181.18026-1R	AP2/ERF-ERF	AP2/ERF->AP2/ERF-ERF	Cluster-3181.18026	1219144968	XP_021735918.1	721	2.3e-73	dehydration-responsive element-binding protein 1D-like [Chenopodium quinoa]	KM679415.1	KM679415	321	6.32016e-166	Suaeda salsa dehydration-responsive element binding protein (CBF1) mRNA, complete cds	--	--	--	--	Q9FJ93	446	6.6e-43	Dehydration-responsive element-binding protein 1D OS=Arabidopsis thaliana OX=3702 GN=DREB1D PE=2 SV=1	PF12404//PF00847	Peptidase//AP2 domain	GO:0006355//GO:0006508	regulation of transcription, DNA-templated//proteolysis	GO:0004177//GO:0003700//GO:0008235//GO:0030145	aminopeptidase activity//DNA-binding transcription factor activity//metalloexopeptidase activity//manganese ion binding	GO:0005667//GO:0005737	transcription regulator complex//cytoplasm	--	--	UP	3.2922	3.8883e-224	blast,frame:-2 start:1132 end:437
Cluster-3181.19436-1F	bHLH	bHLH	Cluster-3181.19436	1219082113	XP_021767200.1	1227	8.4e-132	transcription factor MYC2-like [Chenopodium quinoa]	XM_021911508.1	XM_021911508	209	2.04708e-103	PREDICTED: Chenopodium quinoa transcription factor MYC2-like (LOC110731636), mRNA	--	--	--	--	O23090	541	1.1e-53	Transcription factor bHLH14 OS=Arabidopsis thaliana OX=3702 GN=BHLH14 PE=1 SV=1	PF00083//PF00010//PF02109	Sugar (and other) transporter//Helix-loop-helix DNA-binding domain//DAD family	GO:0055085	transmembrane transport	GO:0046983//GO:0022857	protein dimerization activity//transmembrane transporter activity	GO:0008250//GO:0016021	oligosaccharyltransferase complex//integral component of membrane	--	--	DOWN	-2.1541	1.9059e-51	blast,frame:2 start:2 end:1453
Cluster-3181.19540-2R	MYB-related	MYB->MYB-related	Cluster-3181.19540	1219087976	XP_021770182.1	582	5.2e-57	transcription factor MYB14-like [Chenopodium quinoa]	XM_015231215.2	XM_015231215	46	8.32008e-13	PREDICTED: Solanum pennellii transcription factor MYB4-like (LOC107029771), mRNA	K09422	MYBP	myb proto-oncogene protein, plant	http://www.genome.jp/dbget-bin/www_bget?ko:K09422	Q9LNC9	160	1.7e-09	Transcription factor MYB13 OS=Arabidopsis thaliana OX=3702 GN=MYB13 PE=2 SV=1	--	--	--	--	--	--	--	--	--	--	DOWN	-1.4093	1.5982e-62	blast,frame:-3 start:1150 end:440
Cluster-3181.19544-2R	SET	SET	Cluster-3181.19544	870847624	KMS99971.1	1603	2e-175	hypothetical protein BVRB_1g018130 [Beta vulgaris subsp. vulgaris]	XM_022008280.1	XM_022008280	610	0	PREDICTED: Spinacia oleracea histone-lysine N-methyltransferase ASHR2 (LOC110802817), mRNA	K11426	SMYD	SET and MYND domain-containing protein	http://www.genome.jp/dbget-bin/www_bget?ko:K11426	Q9ZUM9	941	4.4e-100	Histone-lysine N-methyltransferase ASHR2 OS=Arabidopsis thaliana OX=3702 GN=ASHR2 PE=2 SV=3	PF00856	SET domain	--	--	GO:0005515	protein binding	--	--	KOG2084	Predicted histone tail methylase containing SET domain	DOWN	-1.2927	8.978e-39	blast,frame:-3 start:1753 end:512
Cluster-3181.20194-0F	Trihelix	Trihelix	Cluster-3181.20194	870857675	KMT09223.1	1497	8.8e-163	hypothetical protein BVRB_6g133250 [Beta vulgaris subsp. vulgaris]	XM_010681979.2	XM_010681979	377	0	PREDICTED: Beta vulgaris subsp. vulgaris trihelix transcription factor GT-2-like (LOC104895464), mRNA	--	--	--	--	Q9C882	616	4.8e-62	Trihelix transcription factor GTL1 OS=Arabidopsis thaliana OX=3702 GN=GTL1 PE=1 SV=2	PF04805	E10-like protein conserved region	GO:0055114	oxidation-reduction process	GO:0016972	thiol oxidase activity	--	--	--	--	DOWN	-1.1285	1.2037e-32	blast,frame:1 start:181 end:573|blast,frame:3 start:2778 end:4199
Cluster-3181.20194-2F	Trihelix	Trihelix	Cluster-3181.20194	870857675	KMT09223.1	1497	8.8e-163	hypothetical protein BVRB_6g133250 [Beta vulgaris subsp. vulgaris]	XM_010681979.2	XM_010681979	377	0	PREDICTED: Beta vulgaris subsp. vulgaris trihelix transcription factor GT-2-like (LOC104895464), mRNA	--	--	--	--	Q9C882	616	4.8e-62	Trihelix transcription factor GTL1 OS=Arabidopsis thaliana OX=3702 GN=GTL1 PE=1 SV=2	PF04805	E10-like protein conserved region	GO:0055114	oxidation-reduction process	GO:0016972	thiol oxidase activity	--	--	--	--	DOWN	-1.1285	1.2037e-32	blast,frame:1 start:181 end:573|blast,frame:3 start:2778 end:4199
Cluster-3181.20520-2R	C3H	C3H	Cluster-3181.20520	731376963	XP_010667731.1	873	5.7e-91	PREDICTED: zinc finger CCCH domain-containing protein 1 [Beta vulgaris subsp. vulgaris]	XM_021999736.1	XM_021999736	209	1.22395e-103	PREDICTED: Spinacia oleracea zinc finger CCCH domain-containing protein 1 (LOC110794777), transcript variant X2, mRNA	K13127	RNF113A, CWC24	RING finger protein 113A	http://www.genome.jp/dbget-bin/www_bget?ko:K13127	Q8GX84	791	7e-83	Zinc finger CCCH domain-containing protein 1 OS=Arabidopsis thaliana OX=3702 GN=At1g01350 PE=2 SV=2	PF16685//PF11789//PF00097//PF03854//PF00642	zinc RING finger of MSL2//Zinc-finger of the MIZ type in Nse subunit//Zinc finger, C3HC4 type (RING finger)//P-11 zinc finger//Zinc finger C-x8-C-x5-C-x3-H type (and similar)	--	--	GO:0003723//GO:0046872//GO:0061630//GO:0008270	RNA binding//metal ion binding//ubiquitin protein ligase activity//zinc ion binding	--	--	KOG1813	Predicted E3 ubiquitin ligase	UP	4.8194	1.4949e-10	blast,frame:-3 start:1067 end:216|blast,frame:-2 start:1146 end:1000
Cluster-3181.21372-0R	MYB-related	MYB->MYB-related	Cluster-3181.21372	1226832151	XP_021865245.1	627	2.5e-62	transcription factor MYB59 isoform X1 [Spinacia oleracea]	XM_022009554.1	XM_022009554	367	0	PREDICTED: Spinacia oleracea transcription factor MYB59 (LOC110804007), transcript variant X2, mRNA	K09422	MYBP	myb proto-oncogene protein, plant	http://www.genome.jp/dbget-bin/www_bget?ko:K09422	Q4JL76	359	1.1e-32	Myb-related protein MYBAS2 OS=Oryza sativa subsp. japonica OX=39947 GN=MYBAS2 PE=2 SV=1	PF15189	Meiosis-specific coiled-coil domain-containing protein MEIOC	GO:0051321	meiotic cell cycle	--	--	--	--	--	--	DOWN	-1.0104	2.7883e-26	blast,frame:-3 start:782 end:210
Cluster-3181.21372-2R	MYB-related	MYB->MYB-related	Cluster-3181.21372	1226832151	XP_021865245.1	627	2.5e-62	transcription factor MYB59 isoform X1 [Spinacia oleracea]	XM_022009554.1	XM_022009554	367	0	PREDICTED: Spinacia oleracea transcription factor MYB59 (LOC110804007), transcript variant X2, mRNA	K09422	MYBP	myb proto-oncogene protein, plant	http://www.genome.jp/dbget-bin/www_bget?ko:K09422	Q4JL76	359	1.1e-32	Myb-related protein MYBAS2 OS=Oryza sativa subsp. japonica OX=39947 GN=MYBAS2 PE=2 SV=1	PF15189	Meiosis-specific coiled-coil domain-containing protein MEIOC	GO:0051321	meiotic cell cycle	--	--	--	--	--	--	DOWN	-1.0104	2.7883e-26	blast,frame:-3 start:782 end:210
Cluster-3181.22200-1F	C2C2-Dof	C2C2->C2C2-Dof	Cluster-3181.22200	1219053257	XP_021746891.1	987	8.6e-104	cyclic dof factor 1-like [Chenopodium quinoa]	XM_021987296.1	XM_021987296	233	1.41795e-116	PREDICTED: Spinacia oleracea cyclic dof factor 1-like (LOC110782995), transcript variant X4, mRNA	--	--	--	--	Q93ZL5	444	3e-42	Cyclic dof factor 2 OS=Arabidopsis thaliana OX=3702 GN=CDF2 PE=1 SV=2	PF02701//PF04815	Dof domain, zinc finger//Sec23/Sec24 helical domain	GO:0006888//GO:0006886//GO:0006355	endoplasmic reticulum to Golgi vesicle-mediated transport//intracellular protein transport//regulation of transcription, DNA-templated	GO:0003677	DNA binding	GO:0030127	COPII vesicle coat	--	--	DOWN	-1.3238	1.6995e-57	blast,frame:3 start:198 end:434|blast,frame:2 start:1400 end:2713
Cluster-3181.22490-0F	MADS-MIKC	MADS->MADS-MIKC	Cluster-3181.22490	870848593	KMT00882.1	542	1.1e-52	hypothetical protein BVRB_9g221550 isoform A [Beta vulgaris subsp. vulgaris]	XM_010693101.2	XM_010693101	215	4.71705e-107	PREDICTED: Beta vulgaris subsp. vulgaris MADS-box protein JOINTLESS (LOC104904737), transcript variant X2, mRNA	--	--	--	--	O82794	285	2.8e-24	MADS-box protein AGL24 OS=Arabidopsis thaliana OX=3702 GN=AGL24 PE=1 SV=1	PF00319//PF01166//PF02601//PF08142//PF01486	SRF-type transcription factor (DNA-binding and dimerisation domain)//TSC-22/dip/bun family//Exonuclease VII, large subunit//AARP2CN (NUC121) domain//K-box region	GO:0006355//GO:0006308//GO:0042254	regulation of transcription, DNA-templated//DNA catabolic process//ribosome biogenesis	GO:0003700//GO:0046983//GO:0003677//GO:0008855	DNA-binding transcription factor activity//protein dimerization activity//DNA binding//exodeoxyribonuclease VII activity	GO:0009318//GO:0005634//GO:0005667	exodeoxyribonuclease VII complex//nucleus//transcription regulator complex	--	--	DOWN	-1.4321	6.8824e-15	blast,frame:1 start:301 end:990
Cluster-3181.22606-1R	bZIP	bZIP	Cluster-3181.22606	1219109637	XP_021718066.1	489	2.2e-46	bZIP transcription factor 11-like [Chenopodium quinoa]	XM_021862374.1	XM_021862374	176	3.11519e-85	PREDICTED: Chenopodium quinoa bZIP transcription factor 11-like (LOC110685841), mRNA	--	--	--	--	Q9SI15	285	3.8e-24	bZIP transcription factor 2 OS=Arabidopsis thaliana OX=3702 GN=BZIP2 PE=1 SV=1	PF04728//PF00170//PF15898//PF04912//PF04124//PF09726//PF02183//PF07716//PF03131	Lipoprotein leucine-zipper//bZIP transcription factor//cGMP-dependent protein kinase interacting domain//Dynamitin//Dor1-like family//Macoilin family//Homeobox associated leucine zipper//Basic region leucine zipper//bZIP Maf transcription factor	GO:0023041//GO:0007017//GO:0006355	neuronal signal transduction//microtubule-based process//regulation of transcription, DNA-templated	GO:0003700//GO:0019901//GO:0003677//GO:0043565	DNA-binding transcription factor activity//protein kinase binding//DNA binding//sequence-specific DNA binding	GO:0005634//GO:0017119//GO:0030867//GO:0019867//GO:0005667//GO:0005869	nucleus//Golgi transport complex//rough endoplasmic reticulum membrane//outer membrane//transcription regulator complex//dynactin complex	--	--	DOWN	-2.0401	3.6385e-56	blast,frame:-2 start:1048 end:431
Cluster-3181.23313-1F	OFP	OFP	Cluster-3181.23313	1219042801	XP_021757681.1	877	2.5e-91	transcription repressor OFP7-like [Chenopodium quinoa]	XM_010682517.2	XM_010682517	68	3.74196e-25	PREDICTED: Beta vulgaris subsp. vulgaris transcription repressor OFP7 (LOC104895877), mRNA	--	--	--	--	Q9ZU65	341	1.3e-30	Transcription repressor OFP7 OS=Arabidopsis thaliana OX=3702 GN=OFP7 PE=2 SV=1	--	--	--	--	--	--	--	--	--	--	DOWN	-1.3593	9.52e-14	blast,frame:2 start:122 end:1195
Cluster-3181.23343-2F	AP2/ERF-ERF	AP2/ERF->AP2/ERF-ERF	Cluster-3181.23343	731332253	XP_010677103.1	903	2.3e-94	PREDICTED: ethylene-responsive transcription factor 2 [Beta vulgaris subsp. vulgaris]	XM_010678801.2	XM_010678801	390	0	PREDICTED: Beta vulgaris subsp. vulgaris ethylene-responsive transcription factor 2 (LOC104892796), mRNA	K09286	EREBP	EREBP-like factor	http://www.genome.jp/dbget-bin/www_bget?ko:K09286	O80337	520	2.3e-51	Ethylene-responsive transcription factor 1A OS=Arabidopsis thaliana OX=3702 GN=ERF1A PE=1 SV=2	PF00847	AP2 domain	GO:0006355	regulation of transcription, DNA-templated	GO:0003700	DNA-binding transcription factor activity	GO:0005667	transcription regulator complex	--	--	UP	1.1317	5.2999e-64	blast,frame:3 start:213 end:1052
Cluster-3181.23368-2R	NF-YC	NF-Y->NF-YC	Cluster-3181.23368	1219099190	XP_021775875.1	696	2.4e-70	nuclear transcription factor Y subunit C-1-like [Chenopodium quinoa]	XM_016026661.2	XM_016026661	210	4.24643e-104	PREDICTED: Ziziphus jujuba nuclear transcription factor Y subunit C-1 (LOC107417999), mRNA	--	--	--	--	Q9SMP0	655	5.1e-67	Nuclear transcription factor Y subunit C-1 OS=Arabidopsis thaliana OX=3702 GN=NFYC1 PE=1 SV=1	PF15510//PF00125//PF09415	CENP-W protein//Core histone H2A/H2B/H3/H4//CENP-S associating Centromere protein X	GO:0051382//GO:0000278//GO:0006281	kinetochore assembly//mitotic cell cycle//DNA repair	GO:0003677	DNA binding	GO:0000786	nucleosome	KOG1657	CCAAT-binding factor, subunit C (HAP5)	UP	1.1371	4.3014e-41	blast,frame:-3 start:1525 end:782
Cluster-3181.23811-0R	WRKY	WRKY	Cluster-3181.23811	1226794781	XP_021846686.1	1000	4.3e-105	probable WRKY transcription factor 53 [Spinacia oleracea]	XM_021990995.1	XM_021990995	268	7.9774e-136	PREDICTED: Spinacia oleracea uncharacterized LOC110786438 (LOC110786438), mRNA	--	--	--	--	Q9SUP6	347	8.6e-31	Probable WRKY transcription factor 53 OS=Arabidopsis thaliana OX=3702 GN=WRKY53 PE=1 SV=1	PF03106	WRKY DNA -binding domain	GO:0006355	regulation of transcription, DNA-templated	GO:0043565//GO:0003700	sequence-specific DNA binding//DNA-binding transcription factor activity	GO:0005667	transcription regulator complex	--	--	DOWN	-1.2626	3.5391e-56	blast,frame:1 start:703 end:1341|blast,frame:-2 start:4632 end:4288|blast,frame:-1 start:4222 end:3431
Cluster-3181.24773-2R	WRKY	WRKY	Cluster-3181.24773	1219099734	XP_021776141.1	651	5.6e-65	probable WRKY transcription factor 40 [Chenopodium quinoa]	XM_021920449.1	XM_021920449	217	7.80593e-108	PREDICTED: Chenopodium quinoa probable WRKY transcription factor 40 (LOC110739966), mRNA	--	--	--	--	Q6EPZ2	427	2e-40	WRKY transcription factor WRKY76 OS=Oryza sativa subsp. japonica OX=39947 GN=WRKY76 PE=2 SV=1	PF13851//PF03839//PF05478//PF11744//PF03106//PF08326//PF01496//PF07393	Growth-arrest specific micro-tubule binding//Translocation protein Sec62//Prominin//Aluminium activated malate transporter//WRKY DNA -binding domain//Acetyl-CoA carboxylase, central region//V-type ATPase 116kDa subunit family//Exocyst complex component Sec10	GO:0006090//GO:0048870//GO:0006887//GO:0006633//GO:0015031//GO:0015743//GO:1902600//GO:0006355	pyruvate metabolic process//cell motility//exocytosis//fatty acid biosynthetic process//protein transport//malate transport//proton transmembrane transport//regulation of transcription, DNA-templated	GO:0003700//GO:0005524//GO:0003989//GO:0043565//GO:0015078	DNA-binding transcription factor activity//ATP binding//acetyl-CoA carboxylase activity//sequence-specific DNA binding//proton transmembrane transporter activity	GO:0005737//GO:0016021//GO:0009317//GO:0005667//GO:0030176//GO:0031514//GO:0033179	cytoplasm//integral component of membrane//acetyl-CoA carboxylase complex//transcription regulator complex//integral component of endoplasmic reticulum membrane//motile cilium//proton-transporting V-type ATPase, V0 domain	--	--	UP	1.0186	1.8499e-39	blast,frame:-3 start:1095 end:484|blast,frame:-1 start:1559 end:1113|blast,frame:-2 start:2077 end:1805
Cluster-3181.26185-1F	Others	Others	Cluster-3181.26185	319657095	ADV58926.1	2159	1.2e-239	bolting time control 1 [Beta vulgaris subsp. vulgaris]	NM_001303071.1	NM_001303071	664	0	Beta vulgaris subsp. vulgaris two-component response regulator-like PRR73 (BTC1), mRNA &amp;&amp; HQ709097.1 Beta vulgaris subsp. vulgaris genotype 000192 bolting time control 1 (BTC1) mRNA, complete cds	K12129	PRR7	pseudo-response regulator 7	http://www.genome.jp/dbget-bin/www_bget?ko:K12129	A2YQ93	895	1.6e-94	Two-component response regulator-like PRR37 OS=Oryza sativa subsp. indica OX=39946 GN=PRR37 PE=2 SV=2	PF06203//PF00072	CCT motif//Response regulator receiver domain	GO:0000160	phosphorelay signal transduction system	GO:0005515	protein binding	--	--	--	--	UP	1.3753	3.1856e-95	blast,frame:3 start:2928 end:3032
Cluster-3181.26185-2F	Others	Others	Cluster-3181.26185	319657095	ADV58926.1	2159	1.2e-239	bolting time control 1 [Beta vulgaris subsp. vulgaris]	NM_001303071.1	NM_001303071	664	0	Beta vulgaris subsp. vulgaris two-component response regulator-like PRR73 (BTC1), mRNA &amp;&amp; HQ709097.1 Beta vulgaris subsp. vulgaris genotype 000192 bolting time control 1 (BTC1) mRNA, complete cds	K12129	PRR7	pseudo-response regulator 7	http://www.genome.jp/dbget-bin/www_bget?ko:K12129	A2YQ93	895	1.6e-94	Two-component response regulator-like PRR37 OS=Oryza sativa subsp. indica OX=39946 GN=PRR37 PE=2 SV=2	PF06203//PF00072	CCT motif//Response regulator receiver domain	GO:0000160	phosphorelay signal transduction system	GO:0005515	protein binding	--	--	--	--	UP	1.3753	3.1856e-95	blast,frame:3 start:2928 end:3032
Cluster-3181.26698-0F	Others	Others	Cluster-3181.26698	319657108	ADV58932.1	1164	2.4e-124	pseudo-response regulator 7-like protein [Beta vulgaris subsp. vulgaris]	NM_001303066.1	NM_001303066	548	0	Beta vulgaris subsp. vulgaris proline rich 7 (synaptic) (PRR7), mRNA &amp;&amp; HQ709099.1 Beta vulgaris subsp. vulgaris pseudo-response regulator 7-like protein (PRR7) mRNA, complete cds	K12129	PRR7	pseudo-response regulator 7	http://www.genome.jp/dbget-bin/www_bget?ko:K12129	Q93WK5	798	2.6e-83	Two-component response regulator-like APRR7 OS=Arabidopsis thaliana OX=3702 GN=APRR7 PE=1 SV=1	PF06203//PF08648//PF02892//PF00072//PF00201	CCT motif//U4/U6.U5 small nuclear ribonucleoproteins//BED zinc finger//Response regulator receiver domain//UDP-glucoronosyl and UDP-glucosyl transferase	GO:0008380//GO:0000160	RNA splicing//phosphorelay signal transduction system	GO:0016758//GO:0003677//GO:0005515	transferase activity, transferring hexosyl groups//DNA binding//protein binding	--	--	--	--	UP	1.4546	1.4513e-79	blast,frame:3 start:372 end:1442
Cluster-3181.26698-2F	Others	Others	Cluster-3181.26698	319657108	ADV58932.1	1164	2.4e-124	pseudo-response regulator 7-like protein [Beta vulgaris subsp. vulgaris]	NM_001303066.1	NM_001303066	548	0	Beta vulgaris subsp. vulgaris proline rich 7 (synaptic) (PRR7), mRNA &amp;&amp; HQ709099.1 Beta vulgaris subsp. vulgaris pseudo-response regulator 7-like protein (PRR7) mRNA, complete cds	K12129	PRR7	pseudo-response regulator 7	http://www.genome.jp/dbget-bin/www_bget?ko:K12129	Q93WK5	798	2.6e-83	Two-component response regulator-like APRR7 OS=Arabidopsis thaliana OX=3702 GN=APRR7 PE=1 SV=1	PF06203//PF08648//PF02892//PF00072//PF00201	CCT motif//U4/U6.U5 small nuclear ribonucleoproteins//BED zinc finger//Response regulator receiver domain//UDP-glucoronosyl and UDP-glucosyl transferase	GO:0008380//GO:0000160	RNA splicing//phosphorelay signal transduction system	GO:0016758//GO:0003677//GO:0005515	transferase activity, transferring hexosyl groups//DNA binding//protein binding	--	--	--	--	UP	1.4546	1.4513e-79	blast,frame:3 start:372 end:1442
Cluster-3181.26802-1F	bZIP	bZIP	Cluster-3181.26802	731323100	XP_010672248.1	1147	1.9e-122	PREDICTED: probable transcription factor PosF21 [Beta vulgaris subsp. vulgaris]	XM_010673946.2	XM_010673946	592	0	PREDICTED: Beta vulgaris subsp. vulgaris probable transcription factor PosF21 (LOC104888846), mRNA	--	--	--	--	Q04088	862	7.9e-91	Probable transcription factor PosF21 OS=Arabidopsis thaliana OX=3702 GN=POSF21 PE=2 SV=1	PF07716//PF03131//PF00170//PF06156//PF06316	Basic region leucine zipper//bZIP Maf transcription factor//bZIP transcription factor//Initiation control protein YabA//Enterobacterial Ail/Lom protein	GO:0006260//GO:0006355	DNA replication//regulation of transcription, DNA-templated	GO:0003677//GO:0003700	DNA binding//DNA-binding transcription factor activity	GO:0005667//GO:0005634//GO:0044384	transcription regulator complex//nucleus//host outer membrane	--	--	UP	1.5765	3.7363e-120	blast,frame:2 start:284 end:1483
Cluster-3181.27016-0F	GARP-G2-like	GARP->GARP-G2-like	Cluster-3181.27016	731337933	XP_010680052.1	575	5.3e-56	PREDICTED: myb family transcription factor PHL11 [Beta vulgaris subsp. vulgaris]	XM_010681750.2	XM_010681750	255	8.68379e-129	PREDICTED: Beta vulgaris subsp. vulgaris hypothetical protein (LOC104895284), mRNA	--	--	--	--	Q700D9	310	1.1e-26	Putative Myb family transcription factor At1g14600 OS=Arabidopsis thaliana OX=3702 GN=At1g14600 PE=2 SV=2	PF01245	Ribosomal protein L19	GO:0006412//GO:0042254	translation//ribosome biogenesis	GO:0003735	structural constituent of ribosome	GO:0005840	ribosome	--	--	DOWN	-1.1112	5.9676e-15	blast,frame:1 start:214 end:717|blast,frame:2 start:1454 end:1990
Cluster-3181.28261-0F	Others	Others	Cluster-3181.28261	1226780835	XP_021858298.1	387	5.6e-35	two-component response regulator-like APRR5 isoform X1 [Spinacia oleracea]	XM_022002617.1	XM_022002617	168	3.16774e-81	PREDICTED: Spinacia oleracea two-component response regulator-like APRR5 (LOC110797494), transcript variant X3, mRNA	K12130	PRR5	pseudo-response regulator 5	http://www.genome.jp/dbget-bin/www_bget?ko:K12130	Q6LA42	326	2.5e-29	Two-component response regulator-like APRR5 OS=Arabidopsis thaliana OX=3702 GN=APRR5 PE=1 SV=2	PF00072//PF11744	Response regulator receiver domain//Aluminium activated malate transporter	GO:0015743//GO:0000160	malate transport//phosphorelay signal transduction system	--	--	--	--	--	--	DOWN	-3.3491	4.4936e-18	--
Cluster-3181.28716-0F	Others	Others	Cluster-3181.28716	1219140663	XP_021733681.1	511	6.6e-49	LIM domain-containing protein WLIM1-like [Chenopodium quinoa]	XM_021992755.1	XM_021992755	205	2.50991e-101	PREDICTED: Spinacia oleracea LIM domain-containing protein WLIM1-like (LOC110788114), mRNA	K09377	CSRP	cysteine and glycine-rich protein	http://www.genome.jp/dbget-bin/www_bget?ko:K09377	Q94JX5	374	1.9e-34	LIM domain-containing protein WLIM1 OS=Arabidopsis thaliana OX=3702 GN=WLIM1 PE=1 SV=1	PF08782//PF06467	c-SKI Smad4 binding domain//MYM-type Zinc finger with FCS sequence motif	--	--	GO:0008270//GO:0046332	zinc ion binding//SMAD binding	--	--	--	--	DOWN	-1.1678	6.5235e-13	blast,frame:1 start:832 end:1341|blast,frame:3 start:261 end:557
Cluster-3181.28716-2F	Others	Others	Cluster-3181.28716	1219140663	XP_021733681.1	511	6.6e-49	LIM domain-containing protein WLIM1-like [Chenopodium quinoa]	XM_021992755.1	XM_021992755	205	2.50991e-101	PREDICTED: Spinacia oleracea LIM domain-containing protein WLIM1-like (LOC110788114), mRNA	K09377	CSRP	cysteine and glycine-rich protein	http://www.genome.jp/dbget-bin/www_bget?ko:K09377	Q94JX5	374	1.9e-34	LIM domain-containing protein WLIM1 OS=Arabidopsis thaliana OX=3702 GN=WLIM1 PE=1 SV=1	PF08782//PF06467	c-SKI Smad4 binding domain//MYM-type Zinc finger with FCS sequence motif	--	--	GO:0008270//GO:0046332	zinc ion binding//SMAD binding	--	--	--	--	DOWN	-1.1678	6.5235e-13	blast,frame:1 start:832 end:1341|blast,frame:3 start:261 end:557
Cluster-3181.31173-2F	GARP-G2-like	GARP->GARP-G2-like	Cluster-3181.31173	731358937	XP_010691017.1	647	1.1e-64	PREDICTED: myb family transcription factor EFM [Beta vulgaris subsp. vulgaris]	XM_010692715.2	XM_010692715	231	9.11004e-116	PREDICTED: Beta vulgaris subsp. vulgaris myb family transcription factor EFM (LOC104904462), mRNA	--	--	--	--	Q9FX84	337	3.9e-30	Transcription factor HHO6 OS=Arabidopsis thaliana OX=3702 GN=HHO6 PE=2 SV=1	PF08485	Polysaccharide biosynthesis protein C-terminal	GO:0009225//GO:0009117//GO:0006012//GO:0009103	nucleotide-sugar metabolic process//nucleotide metabolic process//galactose metabolic process//lipopolysaccharide biosynthetic process	GO:0003978	UDP-glucose 4-epimerase activity	--	--	--	--	UP	1.9224	4.869e-56	blast,frame:3 start:195 end:950
Cluster-3181.31472-0F	bZIP	bZIP	Cluster-3181.31472	1219067762	XP_021759835.1	699	1.3e-70	transcription factor RF2a-like [Chenopodium quinoa]	XM_015715466.2	XM_015715466	79	3.54683e-31	PREDICTED: Ricinus communis uncharacterized LOC8284386 (LOC8284386), mRNA	--	--	--	--	Q04088	183	3.4e-12	Probable transcription factor PosF21 OS=Arabidopsis thaliana OX=3702 GN=POSF21 PE=2 SV=1	PF07716//PF03131//PF00170	Basic region leucine zipper//bZIP Maf transcription factor//bZIP transcription factor	GO:0006355	regulation of transcription, DNA-templated	GO:0003677//GO:0003700	DNA binding//DNA-binding transcription factor activity	GO:0005634//GO:0005667	nucleus//transcription regulator complex	--	--	UP	1.9679	2.4869e-78	blast,frame:2 start:686 end:916
Cluster-3181.34426-1F	HSF	HSF	Cluster-3181.34426	1219159563	XP_021743319.1	534	6.9e-52	heat stress transcription factor A-3-like isoform X1 [Chenopodium quinoa]	XM_021887628.1	XM_021887628	130	5.94764e-60	PREDICTED: Chenopodium quinoa heat stress transcription factor A-3-like (LOC110709409), transcript variant X2, mRNA	K09419	HSFF	heat shock transcription factor, other eukaryote	http://www.genome.jp/dbget-bin/www_bget?ko:K09419	Q8GYY1	370	2.7e-34	Heat stress transcription factor A-3 OS=Arabidopsis thaliana OX=3702 GN=HSFA3 PE=1 SV=2	PF00447	HSF-type DNA-binding	GO:0006355	regulation of transcription, DNA-templated	GO:0043565//GO:0003700	sequence-specific DNA binding//DNA-binding transcription factor activity	GO:0005667//GO:0042025	transcription regulator complex//host cell nucleus	--	--	UP	5.2057	1.005e-60	blast,frame:2 start:209 end:796
Cluster-3181.35402-0R	DBP	DBP	Cluster-3181.35402	870851561	KMT03608.1	802	1.8e-82	hypothetical protein BVRB_8g192810 [Beta vulgaris subsp. vulgaris]	XM_021886174.1	XM_021886174	346	1.59696e-179	PREDICTED: Chenopodium quinoa probable protein phosphatase 2C 27 (LOC110708070), mRNA	K14803	PTC2_3	protein phosphatase PTC2/3	http://www.genome.jp/dbget-bin/www_bget?ko:K14803	Q69QZ0	670	1.4e-68	Probable protein phosphatase 2C 27 OS=Oryza sativa subsp. japonica OX=39947 GN=Os02g0799000 PE=2 SV=1	PF00481	Protein phosphatase 2C	--	--	GO:0003824	catalytic activity	--	--	--	--	DOWN	-1.1131	7.6933e-23	blast,frame:-1 start:2214 end:1702|blast,frame:-2 start:1121 end:384
Cluster-3181.35883-1F	SNF2	SNF2	Cluster-3181.35883	1219154031	XP_021740504.1	4133	0	helicase-like transcription factor CHR28 [Chenopodium quinoa]	XM_021992058.1	XM_021992058	1518	0	PREDICTED: Spinacia oleracea helicase-like transcription factor CHR28 (LOC110787432), mRNA	--	--	--	--	Q94BR5	2142	5.4e-239	Helicase-like transcription factor CHR28 OS=Arabidopsis thaliana OX=3702 GN=CHR28 PE=1 SV=1	PF00097//PF16685//PF01363//PF12678//PF00176//PF02499	Zinc finger, C3HC4 type (RING finger)//zinc RING finger of MSL2//FYVE zinc finger//RING-H2 zinc finger domain//SNF2 family N-terminal domain//Probable DNA packing protein, C-terminus	GO:0006323	DNA packaging	GO:0008270//GO:0046872//GO:0061630//GO:0005524	zinc ion binding//metal ion binding//ubiquitin protein ligase activity//ATP binding	--	--	KOG1001	Helicase-like transcription factor HLTF/DNA helicase RAD5, DEAD-box superfamily	UP	1.5667	1.7219e-121	blast,frame:2 start:368 end:4081
Cluster-3181.35975-0F	AP2/ERF-ERF	AP2/ERF->AP2/ERF-ERF	Cluster-3181.35975	1219068791	XP_021760359.1	593	2.2e-58	ethylene-responsive transcription factor CRF1-like [Chenopodium quinoa]	XM_010671117.2	XM_010671117	43	3.14302e-11	PREDICTED: Beta vulgaris subsp. vulgaris ethylene-responsive transcription factor CRF6 (LOC104886648), mRNA	--	--	--	--	O82339	343	8.3e-31	Ethylene-responsive transcription factor CRF5 OS=Arabidopsis thaliana OX=3702 GN=CRF5 PE=1 SV=1	PF04995//PF00847	Heme exporter protein D (CcmD)//AP2 domain	GO:0017004//GO:0006355//GO:0015886	cytochrome complex assembly//regulation of transcription, DNA-templated//heme transport	GO:0003700	DNA-binding transcription factor activity	GO:0005667//GO:0016021	transcription regulator complex//integral component of membrane	--	--	DOWN	-1.0071	1.9854e-06	blast,frame:1 start:169 end:1287
Cluster-3181.36926-2F	HSF	HSF	Cluster-3181.36926	--	--	--	--	--	XM_016705606.1	XM_016705606	43	1.18555e-11	PREDICTED: Capsicum annuum heat shock factor protein HSF24 (LOC107860298), mRNA	--	--	--	--	--	--	--	--	--	--	--	--	--	--	--	--	--	--	DOWN	-2.6126	0.0002266	--
Cluster-3181.37890-0F	RWP-RK	RWP-RK	Cluster-3181.37890	1219100007	XP_021776282.1	3141	0	protein NLP2-like [Chenopodium quinoa]	XM_019251924.1	XM_019251924	1166	0	PREDICTED: Beta vulgaris subsp. vulgaris protein NLP2 (LOC104903810), transcript variant X3, mRNA	--	--	--	--	Q7X9B9	1626	3.2e-179	Protein NLP2 OS=Arabidopsis thaliana OX=3702 GN=NLP2 PE=2 SV=3	PF00564	PB1 domain	--	--	GO:0005515	protein binding	--	--	--	--	DOWN	-1.8649	3.7854e-64	blast,frame:1 start:319 end:3390
Cluster-3181.38113-1F	TRAF	TRAF	Cluster-3181.38113	1219175590	XP_021751426.1	802	2.5e-82	BTB/POZ and TAZ domain-containing protein 4-like [Chenopodium quinoa]	XM_021895735.1	XM_021895735	313	4.96653e-161	PREDICTED: Chenopodium quinoa BTB/POZ and TAZ domain-containing protein 4-like (LOC110717090), transcript variant X2, mRNA	--	--	--	--	Q6EJ98	559	1.4e-55	BTB/POZ and TAZ domain-containing protein 5 OS=Arabidopsis thaliana OX=3702 GN=BT5 PE=1 SV=1	PF02135//PF00651	TAZ zinc finger//BTB/POZ domain	GO:0006355//GO:0042967	regulation of transcription, DNA-templated//obsolete acyl-carrier-protein biosynthetic process	GO:0008270//GO:0005515//GO:0004402//GO:0003712	zinc ion binding//protein binding//histone acetyltransferase activity//transcription coregulator activity	GO:0042025//GO:0005667//GO:0000123	host cell nucleus//transcription regulator complex//histone acetyltransferase complex	--	--	UP	2.7105	3.9051e-254	blast,frame:3 start:2109 end:2480|blast,frame:2 start:812 end:1588
Cluster-3181.38113-2F	TAZ	TAZ	Cluster-3181.38113	1219175590	XP_021751426.1	802	2.5e-82	BTB/POZ and TAZ domain-containing protein 4-like [Chenopodium quinoa]	XM_021895735.1	XM_021895735	313	4.96653e-161	PREDICTED: Chenopodium quinoa BTB/POZ and TAZ domain-containing protein 4-like (LOC110717090), transcript variant X2, mRNA	--	--	--	--	Q6EJ98	559	1.4e-55	BTB/POZ and TAZ domain-containing protein 5 OS=Arabidopsis thaliana OX=3702 GN=BT5 PE=1 SV=1	PF02135//PF00651	TAZ zinc finger//BTB/POZ domain	GO:0006355//GO:0042967	regulation of transcription, DNA-templated//obsolete acyl-carrier-protein biosynthetic process	GO:0008270//GO:0005515//GO:0004402//GO:0003712	zinc ion binding//protein binding//histone acetyltransferase activity//transcription coregulator activity	GO:0042025//GO:0005667//GO:0000123	host cell nucleus//transcription regulator complex//histone acetyltransferase complex	--	--	UP	2.7105	3.9051e-254	blast,frame:3 start:2109 end:2480|blast,frame:2 start:812 end:1588
Cluster-3181.3907-1R	AP2/ERF-ERF	AP2/ERF->AP2/ERF-ERF	Cluster-3181.3907	870854576	KMT06331.1	497	1.8e-47	hypothetical protein BVRB_7g160130 [Beta vulgaris subsp. vulgaris]	XM_010685703.2	XM_010685703	222	5.91329e-111	PREDICTED: Beta vulgaris subsp. vulgaris ethylene-responsive transcription factor ERF024 (LOC104898606), mRNA	--	--	--	--	Q9SJR0	329	2.1e-29	Ethylene-responsive transcription factor ERF024 OS=Arabidopsis thaliana OX=3702 GN=ERF024 PE=2 SV=1	PF03854//PF14999//PF00847	P-11 zinc finger//Shadow of prion protein, neuroprotective//AP2 domain	GO:0006355	regulation of transcription, DNA-templated	GO:0008270//GO:0003700//GO:0003723	zinc ion binding//DNA-binding transcription factor activity//RNA binding	GO:0031225//GO:0005667	anchored component of membrane//transcription regulator complex	--	--	UP	2.3681	9.006e-11	blast,frame:-2 start:779 end:171
Cluster-3181.39998-1R	RWP-RK	RWP-RK	Cluster-3181.39998	1523441225	RQM04453.1	164	6.9e-09	hypothetical protein DY000_00030990 [Brassica cretica]	XM_021884080.1	XM_021884080	48	2.84302e-14	PREDICTED: Chenopodium quinoa protein NLP9-like (LOC110706181), mRNA	--	--	--	--	Q8RWY4	154	3.8e-09	Protein NLP6 OS=Arabidopsis thaliana OX=3702 GN=NLP6 PE=2 SV=2	--	--	--	--	--	--	--	--	--	--	DOWN	-1.7454	0.039582	blast,frame:-2 start:104 end:3
Cluster-3181.42435-2R	AP2/ERF-ERF	AP2/ERF->AP2/ERF-ERF	Cluster-3181.42435	1219148571	XP_021737732.1	317	3.5e-26	ethylene-responsive transcription factor ABR1-like [Chenopodium quinoa]	FP091407.1	FP091407	89	1.31362e-36	Phyllostachys edulis cDNA clone: bphyem102c19, full insert sequence	--	--	--	--	Q70II3	252	4.6e-20	Ethylene-responsive transcription factor ERF110 OS=Arabidopsis thaliana OX=3702 GN=ERF110 PE=2 SV=2	--	--	--	--	--	--	--	--	--	--	UP	7.437	0	blast,frame:-3 start:2066 end:1248
Cluster-3181.4355-2F	mTERF	mTERF	Cluster-3181.4355	870848070	KMT00359.1	541	3.9e-52	hypothetical protein BVRB_9g216680 [Beta vulgaris subsp. vulgaris]	XM_020677044.1	XM_020677044	50	6.54963e-15	PREDICTED: Jatropha curcas uncharacterized LOC110008869 (LOC110008869), transcript variant X2, mRNA	--	--	--	--	--	--	--	--	PF02536//PF02294	mTERF//7kD DNA-binding domain	GO:0051252//GO:0006355	regulation of RNA metabolic process//regulation of transcription, DNA-templated	GO:0004521//GO:0003677//GO:0003690	endoribonuclease activity//DNA binding//double-stranded DNA binding	--	--	--	--	UP	8.6645	1.2193e-30	--
Cluster-3181.4461-2R	GARP-G2-like	GARP->GARP-G2-like	Cluster-3181.4461	1219138542	XP_021732658.1	1022	3.9e-108	two-component response regulator ARR1-like [Chenopodium quinoa]	XM_021876966.1	XM_021876966	617	0	PREDICTED: Chenopodium quinoa two-component response regulator ARR1-like (LOC110699465), mRNA	--	--	--	--	Q700D9	264	1.2e-21	Putative Myb family transcription factor At1g14600 OS=Arabidopsis thaliana OX=3702 GN=At1g14600 PE=2 SV=2	--	--	--	--	--	--	--	--	--	--	DOWN	-2.3065	1.3889e-05	blast,frame:-3 start:1497 end:247
Cluster-3181.5081-1F	B3	B3->B3	Cluster-3181.5081	731339675	XP_010680985.1	963	2.3e-101	PREDICTED: B3 domain-containing protein Os01g0723500 [Beta vulgaris subsp. vulgaris]	--	--	--	--	--	--	--	--	--	Q8RYD1	313	2e-27	B3 domain-containing protein REM16 OS=Arabidopsis thaliana OX=3702 GN=REM16 PE=2 SV=1	PF02362	B3 DNA binding domain	--	--	GO:0003677	DNA binding	--	--	--	--	DOWN	-1.6427	0.046482	blast,frame:2 start:17 end:1291
Cluster-3181.6909-1F	AUX/IAA	AUX/IAA	Cluster-3181.6909	1373768197	AVV48468.1	979	3.5e-103	IAA13 [Bassia scoparia]	MF376160.1	MF376160	582	0	Bassia scoparia IAA13 mRNA, complete cds	K14484	IAA	auxin-responsive protein IAA	http://www.genome.jp/dbget-bin/www_bget?ko:K14484	Q38831	510	3.2e-50	Auxin-responsive protein IAA13 OS=Arabidopsis thaliana OX=3702 GN=IAA13 PE=1 SV=2	PF00564	PB1 domain	--	--	GO:0005515	protein binding	--	--	--	--	DOWN	-1.6376	1.6456e-37	blast,frame:2 start:173 end:1156
Cluster-3181.7029-2F	NF-YA	NF-Y->NF-YA	Cluster-3181.7029	902212842	KNA17105.1	1183	9.1e-127	hypothetical protein SOVF_083180 isoform A [Spinacia oleracea]	XM_021917774.1	XM_021917774	455	0	PREDICTED: Chenopodium quinoa nuclear transcription factor Y subunit A-10-like (LOC110737411), transcript variant X2, mRNA	K08064	NFYA	nuclear transcription factor Y, alpha	http://www.genome.jp/dbget-bin/www_bget?ko:K08064	Q9M9X4	358	1.6e-32	Nuclear transcription factor Y subunit A-2 OS=Arabidopsis thaliana OX=3702 GN=NFYA2 PE=2 SV=1	PF02045	CCAAT-binding transcription factor (CBF-B/NF-YA) subunit B	GO:0006355	regulation of transcription, DNA-templated	GO:0003700	DNA-binding transcription factor activity	GO:0005667	transcription regulator complex	--	--	DOWN	-1.1737	2.9033e-17	blast,frame:3 start:426 end:1403
Cluster-3181.8407-2F	MYB	MYB->MYB	Cluster-3181.8407	1219057002	XP_021754232.1	1334	2.1e-144	transcription factor MYB3-like [Chenopodium quinoa]	XM_021898540.1	XM_021898540	447	0	PREDICTED: Chenopodium quinoa transcription factor MYB3-like (LOC110719577), mRNA	K09422	MYBP	myb proto-oncogene protein, plant	http://www.genome.jp/dbget-bin/www_bget?ko:K09422	Q8VZQ2	517	4.4e-51	Transcription factor MYB61 OS=Arabidopsis thaliana OX=3702 GN=MYB61 PE=2 SV=1	PF00681	Plectin repeat	--	--	--	--	GO:0005856	cytoskeleton	--	--	DOWN	-1.9454	0.019039	--
Cluster-3181.8408-1F	MYB	MYB->MYB	Cluster-3181.8408	1219170710	XP_021748976.1	955	1.9e-100	transcription factor SRM1-like [Chenopodium quinoa]	XM_021893284.1	XM_021893284	425	0	PREDICTED: Chenopodium quinoa transcription factor SRM1-like (LOC110714742), mRNA	--	--	--	--	Q9FNN6	488	1e-47	Transcription factor SRM1 OS=Arabidopsis thaliana OX=3702 GN=SRM1 PE=1 SV=1	PF00267	Gram-negative porin	GO:0006810//GO:0034220	transport//ion transmembrane transport	GO:0015288	porin activity	GO:0009279//GO:0016020	cell outer membrane//membrane	--	--	DOWN	-1.3343	2.7118e-05	blast,frame:2 start:125 end:1174
Cluster-3181.9229-0R	C2C2-LSD	C2C2->C2C2-LSD	Cluster-3181.9229	--	--	--	--	--	--	--	--	--	--	--	--	--	--	--	--	--	--	--	--	--	--	--	--	--	--	--	--	UP	1.8788	0.01171	--
Cluster-3181.9411-0R	OFP	OFP	Cluster-3181.9411	731336065	XP_010679055.1	491	6.6e-47	PREDICTED: transcription repressor OFP12-like [Beta vulgaris subsp. vulgaris]	XM_021907035.1	XM_021907035	49	6.20607e-15	PREDICTED: Chenopodium quinoa transcription repressor OFP12-like (LOC110727480), mRNA	--	--	--	--	F4I8R6	200	1.4e-14	Transcription repressor OFP12 OS=Arabidopsis thaliana OX=3702 GN=OFP12 PE=1 SV=1	--	--	--	--	--	--	--	--	--	--	DOWN	-3.2349	1.5749e-10	blast,frame:-1 start:740 end:3
Cluster-5273.0-0F	WRKY	WRKY	Cluster-5273.0	1219072960	XP_021762468.1	854	1.3e-88	WRKY transcription factor 44-like [Chenopodium quinoa]	XM_021995953.1	XM_021995953	199	6.57428e-98	PREDICTED: Spinacia oleracea WRKY transcription factor 44-like (LOC110791204), transcript variant X1, mRNA	--	--	--	--	Q9ZUU0	449	4.7e-43	WRKY transcription factor 44 OS=Arabidopsis thaliana OX=3702 GN=WRKY44 PE=1 SV=2	PF03106	WRKY DNA -binding domain	GO:0006355	regulation of transcription, DNA-templated	GO:0003700//GO:0043565	DNA-binding transcription factor activity//sequence-specific DNA binding	GO:0005667	transcription regulator complex	--	--	DOWN	-1.2112	0.0069742	blast,frame:3 start:1293 end:1427|blast,frame:2 start:128 end:1156
Cluster-5273.0-1F	WRKY	WRKY	Cluster-5273.0	1219072960	XP_021762468.1	854	1.3e-88	WRKY transcription factor 44-like [Chenopodium quinoa]	XM_021995953.1	XM_021995953	199	6.57428e-98	PREDICTED: Spinacia oleracea WRKY transcription factor 44-like (LOC110791204), transcript variant X1, mRNA	--	--	--	--	Q9ZUU0	449	4.7e-43	WRKY transcription factor 44 OS=Arabidopsis thaliana OX=3702 GN=WRKY44 PE=1 SV=2	PF03106	WRKY DNA -binding domain	GO:0006355	regulation of transcription, DNA-templated	GO:0003700//GO:0043565	DNA-binding transcription factor activity//sequence-specific DNA binding	GO:0005667	transcription regulator complex	--	--	DOWN	-1.2112	0.0069742	blast,frame:3 start:1293 end:1427|blast,frame:2 start:128 end:1156
Cluster-6354.0-2F	bHLH	bHLH	Cluster-6354.0	1219066688	XP_021759301.1	863	7.1e-90	transcription factor BEE 3-like [Chenopodium quinoa]	XM_010679694.2	XM_010679694	281	1.00055e-143	PREDICTED: Beta vulgaris subsp. vulgaris transcription factor BEE 3 (LOC104893570), mRNA	--	--	--	--	Q8GWK7	450	2.1e-43	Transcription factor BEE 3 OS=Arabidopsis thaliana OX=3702 GN=BEE3 PE=2 SV=1	PF00010	Helix-loop-helix DNA-binding domain	--	--	GO:0046983	protein dimerization activity	--	--	--	--	UP	2.495	0.0011402	blast,frame:3 start:12 end:932
Cluster-7019.0-1R	Tify	Tify	Cluster-7019.0	1219143900	XP_021735330.1	274	1.3e-21	protein TIFY 5A-like [Chenopodium quinoa]	--	--	--	--	--	--	--	--	--	Q8LBM2	125	9.1e-06	Protein TIFY 5A OS=Arabidopsis thaliana OX=3702 GN=TIFY5A PE=1 SV=1	--	--	--	--	--	--	--	--	--	--	UP	2.2903	0.0011907	blast,frame:-2 start:478 end:158
Cluster-7196.0-2R	MYB	MYB->MYB	Cluster-7196.0	1226825802	XP_021862075.1	938	1.9e-98	transcription factor MYB46 [Spinacia oleracea]	XM_010687063.1	XM_010687063	223	2.29802e-111	PREDICTED: Beta vulgaris subsp. vulgaris transcription factor MYB26 (LOC104899795), mRNA	K09422	MYBP	myb proto-oncogene protein, plant	http://www.genome.jp/dbget-bin/www_bget?ko:K09422	Q9SPG3	579	3e-58	Transcription factor MYB26 OS=Arabidopsis thaliana OX=3702 GN=MYB26 PE=2 SV=1	--	--	--	--	--	--	--	--	--	--	DOWN	-3.7763	2.0968e-05	blast,frame:-3 start:1354 end:62
Cluster-8637.0-2R	FAR1	FAR1	Cluster-8637.0	1219073772	XP_021762899.1	1877	3.7e-207	protein FAR1-RELATED SEQUENCE 5-like [Chenopodium quinoa]	XM_021907207.1	XM_021907207	381	0	PREDICTED: Chenopodium quinoa protein FAR1-RELATED SEQUENCE 5-like (LOC110727629), mRNA	--	--	--	--	Q9SZL8	709	3.9e-73	Protein FAR1-RELATED SEQUENCE 5 OS=Arabidopsis thaliana OX=3702 GN=FRS5 PE=1 SV=1	PF03660//PF00539//PF00872//PF04434	PHF5-like protein//Transactivating regulatory protein (Tat)//Transposase, Mutator family//SWIM zinc finger	GO:0050434//GO:0000398//GO:0006313	positive regulation of viral transcription//mRNA splicing, via spliceosome//transposition, DNA-mediated	GO:0004803//GO:0008270//GO:0001070//GO:0003677	transposase activity//zinc ion binding//RNA-binding transcription regulator activity//DNA binding	GO:0042025	host cell nucleus	--	--	DOWN	-2.4809	1.0703e-07	blast,frame:-3 start:2217 end:1606|blast,frame:-2 start:1615 end:113
Cluster-9017.0-1F	MADS-M-type	MADS->MADS-M-type	Cluster-9017.0	731344412	XP_010683404.1	211	2.1e-14	PREDICTED: uncharacterized protein LOC104898092 [Beta vulgaris subsp. vulgaris]	--	--	--	--	--	--	--	--	--	--	--	--	--	PF00319	SRF-type transcription factor (DNA-binding and dimerisation domain)	--	--	GO:0003677//GO:0046983	DNA binding//protein dimerization activity	--	--	--	--	UP	3.2527	0.030341	blast,frame:2 start:2 end:862
Cluster-9059.0-2F	LOB	LOB	Cluster-9059.0	731374833	XP_010667079.1	758	9.6e-78	PREDICTED: LOB domain-containing protein 4 [Beta vulgaris subsp. vulgaris]	XM_010668777.2	XM_010668777	271	3.25917e-138	PREDICTED: Beta vulgaris subsp. vulgaris LOB domain-containing protein 4 (LOC104884175), mRNA	--	--	--	--	Q9SHE9	648	2.1e-66	LOB domain-containing protein 4 OS=Arabidopsis thaliana OX=3702 GN=LBD4 PE=1 SV=1	--	--	--	--	--	--	--	--	--	--	DOWN	-1.6247	0.010339	blast,frame:3 start:144 end:701
Cluster-9614.0-0R	SRS	SRS	Cluster-9614.0	1269914843	XP_022769102.1	494	7.5e-47	protein SHI RELATED SEQUENCE 5-like isoform X4 [Durio zibethinus]	XM_022006774.1	XM_022006774	347	3.55028e-180	PREDICTED: Spinacia oleracea protein SHI RELATED SEQUENCE 1-like (LOC110801413), mRNA	--	--	--	--	Q9SI19	323	1.9e-28	Protein SHI RELATED SEQUENCE 4 OS=Arabidopsis thaliana OX=3702 GN=SRS4 PE=1 SV=1	PF15168	Triple QxxK/R motif-containing protein family	--	--	--	--	GO:0005789	endoplasmic reticulum membrane	--	--	DOWN	-1.2999	0.0062652	blast,frame:-1 start:1609 end:281
Cluster-10466.0-1F	MYB	MYB->MYB	Cluster-10466.0	1219083015	XP_021767663.1	1152	2.6e-123	transcription factor RAX3-like [Chenopodium quinoa]	XM_010689207.2	XM_010689207	415	0	PREDICTED: Beta vulgaris subsp. vulgaris transcription factor RAX3-like (LOC104901614), mRNA	K09422	MYBP	myb proto-oncogene protein, plant	http://www.genome.jp/dbget-bin/www_bget?ko:K09422	Q9FKL2	605	2.7e-61	Transcription factor MYB36 OS=Arabidopsis thaliana OX=3702 GN=MYB36 PE=1 SV=1	PF09111	SLIDE	GO:0006338	chromatin remodeling	GO:0003676//GO:0005524//GO:0016818	nucleic acid binding//ATP binding//hydrolase activity, acting on acid anhydrides, in phosphorus-containing anhydrides	GO:0005634	nucleus	--	--	DOWN	-2.8017	3.6445e-06	blast,frame:2 start:47 end:1189
Cluster-11271.0-0F	SET	SET	Cluster-11271.0	731328942	XP_010675323.1	699	9.8e-71	PREDICTED: histone-lysine N-methyltransferase ATXR4 [Beta vulgaris subsp. vulgaris]	XM_010677021.2	XM_010677021	257	2.93281e-130	PREDICTED: Beta vulgaris subsp. vulgaris histone-lysine N-methyltransferase ATXR4 (LOC104891340), mRNA	K11426	SMYD	SET and MYND domain-containing protein	http://www.genome.jp/dbget-bin/www_bget?ko:K11426	Q9FG08	426	1.7e-40	Histone-lysine N-methyltransferase ATXR4 OS=Arabidopsis thaliana OX=3702 GN=ATXR4 PE=2 SV=2	PF00856	SET domain	--	--	GO:0005515	protein binding	--	--	--	--	UP	1.9483	1.5107e-09	blast,frame:1 start:757 end:1155|blast,frame:3 start:3 end:767
Cluster-11517.0-2R	LOB	LOB	Cluster-11517.0	870850762	KMT02828.1	718	6.6e-73	hypothetical protein BVRB_8g194110 [Beta vulgaris subsp. vulgaris]	XM_019249860.1	XM_019249860	169	2.62418e-81	PREDICTED: Beta vulgaris subsp. vulgaris LOB domain-containing protein 36 (LOC104895632), mRNA	--	--	--	--	Q9FKZ3	586	5.1e-59	LOB domain-containing protein 36 OS=Arabidopsis thaliana OX=3702 GN=LBD36 PE=2 SV=1	PF02362	B3 DNA binding domain	--	--	GO:0003677	DNA binding	--	--	--	--	UP	1.0325	0.0027953	blast,frame:-3 start:1444 end:362
Cluster-14048.0-2F	mTERF	mTERF	Cluster-14048.0	902183939	KNA10214.1	1980	3.7e-219	hypothetical protein SOVF_146570 [Spinacia oleracea]	XM_010675787.2	XM_010675787	985	0	PREDICTED: Beta vulgaris subsp. vulgaris hypothetical protein (LOC104890343), mRNA	K15032	MTERFD	mTERF domain-containing protein, mitochondrial	http://www.genome.jp/dbget-bin/www_bget?ko:K15032	Q9ZT96	1671	9.4e-185	Transcription termination factor MTERF4, chloroplastic OS=Arabidopsis thaliana OX=3702 GN=MTERF4 PE=1 SV=1	PF02536	mTERF	GO:0006355	regulation of transcription, DNA-templated	GO:0003690	double-stranded DNA binding	--	--	--	--	DOWN	-1.1194	4.24e-08	blast,frame:3 start:177 end:1760
Cluster-14474.0-1F	B3	B3->B3	Cluster-14474.0	1226854500	XP_021840512.1	988	2.7e-104	B3 domain-containing protein REM16-like [Spinacia oleracea]	--	--	--	--	--	--	--	--	--	Q8RYD1	235	2.1e-18	B3 domain-containing protein REM16 OS=Arabidopsis thaliana OX=3702 GN=REM16 PE=2 SV=1	PF02362//PF01080//PF07425//PF04014	B3 DNA binding domain//Presenilin//Pardaxin//Antidote-toxin recognition MazE, bacterial antitoxin	GO:0016485	protein processing	GO:0003677//GO:0004190	DNA binding//aspartic-type endopeptidase activity	GO:0005576//GO:0016021	extracellular region//integral component of membrane	--	--	DOWN	-1.8332	0.012248	blast,frame:2 start:2 end:1162
Cluster-1494.0-0R	MADS-M-type	MADS->MADS-M-type	Cluster-1494.0	1219051170	XP_021737021.1	384	1.3e-34	developmental protein SEPALLATA 1-like [Chenopodium quinoa]	XM_010695832.2	XM_010695832	236	5.1662e-119	PREDICTED: Beta vulgaris subsp. vulgaris developmental protein SEPALLATA 1 (LOC104906969), transcript variant X4, mRNA	K09264	K09264	MADS-box transcription factor, plant	http://www.genome.jp/dbget-bin/www_bget?ko:K09264	Q8LLR0	367	4.5e-34	Agamous-like MADS-box protein MADS4 OS=Vitis vinifera OX=29760 GN=MADS4 PE=2 SV=2	PF00319	SRF-type transcription factor (DNA-binding and dimerisation domain)	--	--	GO:0046983//GO:0003677	protein dimerization activity//DNA binding	--	--	--	--	UP	4.601	0.034297	blast,frame:-1 start:234 end:1
Cluster-15261.0-2F	MYB	MYB->MYB	Cluster-15261.0	731376468	XP_010667574.1	883	3.8e-92	PREDICTED: transcription factor LAF1-like [Beta vulgaris subsp. vulgaris]	XM_010669272.2	XM_010669272	259	1.91759e-131	PREDICTED: Beta vulgaris subsp. vulgaris transcription factor LAF1-like (LOC104884590), mRNA	K09422	MYBP	myb proto-oncogene protein, plant	http://www.genome.jp/dbget-bin/www_bget?ko:K09422	Q9M0K4	496	1.1e-48	Transcription factor LAF1 OS=Arabidopsis thaliana OX=3702 GN=LAF1 PE=1 SV=2	PF03810	Importin-beta N-terminal domain	GO:0006886	intracellular protein transport	GO:0008536	Ran GTPase binding	--	--	--	--	UP	1.7593	0.0090978	blast,frame:3 start:162 end:1040
Cluster-2360.1-1R	FAR1	FAR1	Cluster-2360.1	1219151146	XP_021739063.1	659	3.4e-66	protein FAR1-RELATED SEQUENCE 8-like isoform X1 [Chenopodium quinoa]	--	--	--	--	--	--	--	--	--	Q9SWG3	253	1.6e-20	Protein FAR-RED IMPAIRED RESPONSE 1 OS=Arabidopsis thaliana OX=3702 GN=FAR1 PE=1 SV=1	--	--	--	--	--	--	--	--	--	--	UP	7.2665	5.123e-07	blast,frame:-2 start:1071 end:1
Cluster-3181.10155-1F	AP2/ERF-ERF	AP2/ERF->AP2/ERF-ERF	Cluster-3181.10155	1219047819	XP_021719375.1	773	3.1e-79	ethylene-responsive transcription factor ERF114-like [Chenopodium quinoa]	XM_021876251.1	XM_021876251	300	4.36939e-154	PREDICTED: Chenopodium quinoa ethylene-responsive transcription factor ERF114-like (LOC110698737), mRNA	--	--	--	--	Q9FH54	389	3.9e-36	Ethylene-responsive transcription factor ERF114 OS=Arabidopsis thaliana OX=3702 GN=ERF114 PE=1 SV=1	PF00847	AP2 domain	GO:0006355	regulation of transcription, DNA-templated	GO:0003700	DNA-binding transcription factor activity	GO:0005667	transcription regulator complex	--	--	UP	1.8356	2.2978e-06	blast,frame:2 start:110 end:1144
Cluster-3181.10533-0R	MADS-M-type	MADS->MADS-M-type	Cluster-3181.10533	1219151797	XP_021739400.1	551	2.3e-53	truncated transcription factor CAULIFLOWER A-like isoform X1 [Chenopodium quinoa]	XM_021883708.1	XM_021883708	237	6.20122e-119	PREDICTED: Chenopodium quinoa truncated transcription factor CAULIFLOWER A-like (LOC110705777), transcript variant X1, mRNA	K09264	K09264	MADS-box transcription factor, plant	http://www.genome.jp/dbget-bin/www_bget?ko:K09264	D7SMN6	435	2.4e-41	Agamous-like MADS-box protein FUL-L OS=Vitis vinifera OX=29760 GN=FULL PE=2 SV=1	PF02017//PF00319//PF10018//PF01486	CIDE-N domain//SRF-type transcription factor (DNA-binding and dimerisation domain)//Vitamin-D-receptor interacting Mediator subunit 4//K-box region	GO:0006355//GO:0006357//GO:0006915	regulation of transcription, DNA-templated//regulation of transcription by RNA polymerase II//apoptotic process	GO:0003677//GO:0003700//GO:0003712//GO:0046983	DNA binding//DNA-binding transcription factor activity//transcription coregulator activity//protein dimerization activity	GO:0005667//GO:0016592//GO:0005634	transcription regulator complex//mediator complex//nucleus	--	--	DOWN	-1.3314	5.3575e-14	blast,frame:-2 start:954 end:406|blast,frame:-1 start:2119 end:1700
Cluster-3181.11861-0R	GARP-G2-like	GARP->GARP-G2-like	Cluster-3181.11861	947045360	KRG94989.1	157	8.3e-08	hypothetical protein GLYMA_19G122700 [Glycine max]	XM_018959128.1	XM_018959128	65	1.89731e-23	PREDICTED: Juglans regia myb family transcription factor PHL7-like (LOC108986496), transcript variant X5, mRNA	--	--	--	--	Q9SJW0	139	3.9e-07	Myb family transcription factor PHL7 OS=Arabidopsis thaliana OX=3702 GN=PHL7 PE=2 SV=1	--	--	--	--	--	--	--	--	--	--	UP	1.1211	0.0001117	blast,frame:-1 start:150 end:1
Cluster-3181.12148-0R	MYB	MYB->MYB	Cluster-3181.12148	1226793954	XP_021846262.1	1326	1.9e-143	transcription factor MYB41 [Spinacia oleracea]	XM_021896900.1	XM_021896900	424	0	PREDICTED: Chenopodium quinoa transcription factor MYB39-like (LOC110718102), mRNA	K09422	MYBP	myb proto-oncogene protein, plant	http://www.genome.jp/dbget-bin/www_bget?ko:K09422	Q9S9Z2	667	1.9e-68	Transcription factor MYB93 OS=Arabidopsis thaliana OX=3702 GN=MYB93 PE=1 SV=1	--	--	--	--	--	--	--	--	--	--	DOWN	-1.4985	0.00032092	blast,frame:-1 start:1393 end:206
Cluster-3181.12386-0F	C2H2	C2H2	Cluster-3181.12386	870867972	KMT18841.1	980	2.7e-103	hypothetical protein BVRB_2g029460 [Beta vulgaris subsp. vulgaris]	XM_021879150.1	XM_021879150	321	8.21335e-166	PREDICTED: Chenopodium quinoa zinc finger protein WIP6-like (LOC110701508), mRNA	--	--	--	--	Q9SVY1	837	3.9e-88	Zinc finger protein WIP2 OS=Arabidopsis thaliana OX=3702 GN=WIP2 PE=1 SV=1	PF00096	Zinc finger, C2H2 type	--	--	GO:0003676	nucleic acid binding	--	--	--	--	DOWN	-1.276	0.00090454	blast,frame:1 start:34 end:1377
Cluster-3181.12956-0R	WRKY	WRKY	Cluster-3181.12956	731322198	XP_010671761.1	565	5.9e-55	PREDICTED: probable WRKY transcription factor 23 [Beta vulgaris subsp. vulgaris]	XM_010673459.2	XM_010673459	133	4.3967e-61	PREDICTED: Beta vulgaris subsp. vulgaris probable WRKY transcription factor 23 (LOC104888469), mRNA	--	--	--	--	Q9FGZ4	258	8.9e-21	Probable WRKY transcription factor 48 OS=Arabidopsis thaliana OX=3702 GN=WRKY48 PE=2 SV=1	PF03106//PF03153	WRKY DNA -binding domain//Transcription factor IIA, alpha/beta subunit	GO:0006367//GO:0006355	transcription initiation from RNA polymerase II promoter//regulation of transcription, DNA-templated	GO:0043565//GO:0003700	sequence-specific DNA binding//DNA-binding transcription factor activity	GO:0005667//GO:0005672	transcription regulator complex//transcription factor TFIIA complex	--	--	UP	1.0743	1.1946e-22	blast,frame:-2 start:1516 end:941|blast,frame:-1 start:2480 end:1599
Cluster-3181.12956-1R	WRKY	WRKY	Cluster-3181.12956	731322198	XP_010671761.1	565	5.9e-55	PREDICTED: probable WRKY transcription factor 23 [Beta vulgaris subsp. vulgaris]	XM_010673459.2	XM_010673459	133	4.3967e-61	PREDICTED: Beta vulgaris subsp. vulgaris probable WRKY transcription factor 23 (LOC104888469), mRNA	--	--	--	--	Q9FGZ4	258	8.9e-21	Probable WRKY transcription factor 48 OS=Arabidopsis thaliana OX=3702 GN=WRKY48 PE=2 SV=1	PF03106//PF03153	WRKY DNA -binding domain//Transcription factor IIA, alpha/beta subunit	GO:0006367//GO:0006355	transcription initiation from RNA polymerase II promoter//regulation of transcription, DNA-templated	GO:0043565//GO:0003700	sequence-specific DNA binding//DNA-binding transcription factor activity	GO:0005667//GO:0005672	transcription regulator complex//transcription factor TFIIA complex	--	--	UP	1.0743	1.1946e-22	blast,frame:-2 start:1516 end:941|blast,frame:-1 start:2480 end:1599
Cluster-3181.15150-1R	C2H2	C2H2	Cluster-3181.15150	870853617	KMT05498.1	1345	1.4e-145	hypothetical protein BVRB_7g176220 [Beta vulgaris subsp. vulgaris]	XM_022008222.1	XM_022008222	575	0	PREDICTED: Spinacia oleracea zinc finger protein WIP3-like (LOC110802774), mRNA	--	--	--	--	Q9SVY1	873	2.9e-92	Zinc finger protein WIP2 OS=Arabidopsis thaliana OX=3702 GN=WIP2 PE=1 SV=1	PF00096	Zinc finger, C2H2 type	--	--	GO:0003676	nucleic acid binding	--	--	--	--	DOWN	-1.5868	6.4799e-20	blast,frame:-2 start:1658 end:531
Cluster-3181.15189-0F	C2C2-YABBY	C2C2->C2C2-YABBY	Cluster-3181.15189	--	--	--	--	--	--	--	--	--	--	--	--	--	--	--	--	--	--	--	--	--	--	--	--	--	--	--	--	DOWN	-2.8082	3.5003e-14	--
Cluster-3181.15458-1F	TRAF	TRAF	Cluster-3181.15458	1219104749	XP_021715600.1	1876	3.8e-207	BTB/POZ and MATH domain-containing protein 4-like [Chenopodium quinoa]	XM_010687202.2	XM_010687202	800	0	PREDICTED: Beta vulgaris subsp. vulgaris BTB/POZ and MATH domain-containing protein 4 (LOC104899910), mRNA	K10523	SPOP	speckle-type POZ protein	http://www.genome.jp/dbget-bin/www_bget?ko:K10523	Q9SRV1	1415	4.1e-155	BTB/POZ and MATH domain-containing protein 4 OS=Arabidopsis thaliana OX=3702 GN=BPM4 PE=1 SV=1	PF00651//PF04647//PF02214	BTB/POZ domain//Accessory gene regulator B//BTB/POZ domain	GO:0009405//GO:0051260//GO:0009372	pathogenesis//protein homooligomerization//quorum sensing	GO:0008233//GO:0005515	peptidase activity//protein binding	GO:0016021	integral component of membrane	KOG1987	Speckle-type POZ protein SPOP and related proteins with TRAF, MATH and BTB/POZ domains	UP	1.4482	6.9849e-74	blast,frame:2 start:290 end:1510
Cluster-3181.1640-1R	MYB	MYB->MYB	Cluster-3181.1640	870490025	AKP07635.1	1005	3.2e-106	R2R3 type MYB15 [Salicornia brachiata]	KP749920.1	KP749920	341	5.88718e-177	Salicornia brachiata R2R3 type MYB15 (MYB15) mRNA, complete cds	K09422	MYBP	myb proto-oncogene protein, plant	http://www.genome.jp/dbget-bin/www_bget?ko:K09422	Q9FKL2	606	2.3e-61	Transcription factor MYB36 OS=Arabidopsis thaliana OX=3702 GN=MYB36 PE=1 SV=1	--	--	--	--	--	--	--	--	--	--	UP	1.7795	1.99e-08	blast,frame:-2 start:1289 end:132
Cluster-3181.1645-0F	MADS-MIKC	MADS->MADS-MIKC	Cluster-3181.1645	731359755	XP_010691449.1	675	4.9e-68	PREDICTED: MADS-box transcription factor 23-like [Beta vulgaris subsp. vulgaris]	--	--	--	--	--	--	--	--	--	Q6EP49	455	6e-44	MADS-box transcription factor 27 OS=Oryza sativa subsp. japonica OX=39947 GN=MADS27 PE=2 SV=2	PF02025//PF00319//PF01486	Interleukin 5//SRF-type transcription factor (DNA-binding and dimerisation domain)//K-box region	GO:0006955//GO:0006355//GO:0008283//GO:0040007//GO:0007165	immune response//regulation of transcription, DNA-templated//cell population proliferation//growth//signal transduction	GO:0005137//GO:0003677//GO:0046983//GO:0003700//GO:0008083	interleukin-5 receptor binding//DNA binding//protein dimerization activity//DNA-binding transcription factor activity//growth factor activity	GO:0005667//GO:0005634//GO:0005576//GO:0005895	transcription regulator complex//nucleus//extracellular region//interleukin-5 receptor complex	--	--	UP	1.6307	1.2399e-12	blast,frame:1 start:1 end:675
Cluster-3181.16833-1R	MYB-related	MYB->MYB-related	Cluster-3181.16833	731328780	XP_010675239.1	574	3.8e-56	PREDICTED: protein REVEILLE 2 isoform X1 [Beta vulgaris subsp. vulgaris]	XM_022000343.1	XM_022000343	294	9.78602e-151	PREDICTED: Spinacia oleracea protein REVEILLE 1 (LOC110795337), transcript variant X2, mRNA	--	--	--	--	F4KGY6	353	6.1e-32	Protein REVEILLE 1 OS=Arabidopsis thaliana OX=3702 GN=RVE1 PE=2 SV=1	--	--	--	--	--	--	--	--	--	--	DOWN	-1.5664	4.2027e-48	--
Cluster-3181.181-1R	bZIP	bZIP	Cluster-3181.181	1226824575	XP_021861461.1	1048	4.2e-111	probable basic-leucine zipper transcription factor F [Spinacia oleracea]	XM_022005769.1	XM_022005769	254	1.70458e-128	PREDICTED: Spinacia oleracea probable basic-leucine zipper transcription factor F (LOC110800466), mRNA	--	--	--	--	--	--	--	--	PF13851//PF00170//PF07716	Growth-arrest specific micro-tubule binding//bZIP transcription factor//Basic region leucine zipper	GO:0048870//GO:0006355	cell motility//regulation of transcription, DNA-templated	GO:0003700	DNA-binding transcription factor activity	GO:0031514//GO:0005667	motile cilium//transcription regulator complex	--	--	UP	4.3599	3.2151e-07	blast,frame:-2 start:1632 end:238
Cluster-3181.18385-1R	C3H	C3H	Cluster-3181.18385	1226806448	XP_021852534.1	1250	1.6e-134	zinc finger CCCH domain-containing protein 20-like [Spinacia oleracea]	XM_021869317.1	XM_021869317	315	2.17471e-162	PREDICTED: Chenopodium quinoa zinc finger CCCH domain-containing protein 20-like (LOC110692312), transcript variant X1, mRNA	--	--	--	--	O82199	695	1.4e-71	Zinc finger CCCH domain-containing protein 20 OS=Arabidopsis thaliana OX=3702 GN=At2g19810 PE=2 SV=1	PF00642	Zinc finger C-x8-C-x5-C-x3-H type (and similar)	--	--	GO:0046872	metal ion binding	--	--	--	--	DOWN	-1.6979	4.9502e-14	blast,frame:-2 start:1952 end:783
Cluster-3181.19228-1R	MYB-related	MYB->MYB-related	Cluster-3181.19228	731326179	XP_010673889.1	276	8.4e-22	PREDICTED: uncharacterized protein LOC104890194 [Beta vulgaris subsp. vulgaris]	--	--	--	--	--	--	--	--	--	--	--	--	--	--	--	--	--	--	--	--	--	--	--	UP	3.4612	2.2714e-11	blast,frame:-2 start:915 end:544
Cluster-3181.20816-2R	NAC	NAC	Cluster-3181.20816	731369311	XP_010696509.1	422	7.3e-39	PREDICTED: NAC domain-containing protein 17 [Beta vulgaris subsp. vulgaris]	XM_022008657.1	XM_022008657	143	3.86605e-67	PREDICTED: Spinacia oleracea NAC domain-containing protein 17-like (LOC110803174), transcript variant X2, mRNA	--	--	--	--	Q9XIC5	332	7.6e-30	NAC domain-containing protein 17 OS=Arabidopsis thaliana OX=3702 GN=NAC017 PE=2 SV=1	PF02365	No apical meristem (NAM) protein	GO:0006355	regulation of transcription, DNA-templated	GO:0003677	DNA binding	--	--	--	--	DOWN	-2.0612	6.9528e-06	blast,frame:-3 start:395 end:78
Cluster-3181.21036-1R	AP2/ERF-ERF	AP2/ERF->AP2/ERF-ERF	Cluster-3181.21036	1219164138	XP_021745698.1	1177	5.6e-126	ethylene-responsive transcription factor ERF062-like [Chenopodium quinoa]	XM_021890006.1	XM_021890006	379	0	PREDICTED: Chenopodium quinoa ethylene-responsive transcription factor ERF062-like (LOC110711601), mRNA	--	--	--	--	Q9SVQ0	373	3.6e-34	Ethylene-responsive transcription factor ERF062 OS=Arabidopsis thaliana OX=3702 GN=ERF062 PE=2 SV=1	PF00319//PF00847	SRF-type transcription factor (DNA-binding and dimerisation domain)//AP2 domain	GO:0006355	regulation of transcription, DNA-templated	GO:0003700//GO:0003677//GO:0046983	DNA-binding transcription factor activity//DNA binding//protein dimerization activity	GO:0005667	transcription regulator complex	--	--	DOWN	-2.1717	1.0681e-05	blast,frame:-2 start:1594 end:167
Cluster-3181.22111-1F	Others	Others	Cluster-3181.22111	870865432	KMT16488.1	452	1.7e-42	hypothetical protein BVRB_3g051050 isoform B [Beta vulgaris subsp. vulgaris]	XM_010673041.2	XM_010673041	157	4.27911e-75	PREDICTED: Beta vulgaris subsp. vulgaris two-component response regulator-like APRR5 (LOC104888159), transcript variant X2, mRNA	K12130	PRR5	pseudo-response regulator 5	http://www.genome.jp/dbget-bin/www_bget?ko:K12130	Q8L500	268	1.4e-22	Two-component response regulator-like APRR9 OS=Arabidopsis thaliana OX=3702 GN=APRR9 PE=1 SV=2	PF00072	Response regulator receiver domain	GO:0000160	phosphorelay signal transduction system	--	--	--	--	--	--	DOWN	-2.3631	3.2007e-23	blast,frame:2 start:29 end:397
Cluster-3181.22115-1R	B3-ARF	B3->B3-ARF	Cluster-3181.22115	731350214	XP_010686391.1	3044	0	PREDICTED: auxin response factor 3 isoform X2 [Beta vulgaris subsp. vulgaris]	XM_021870847.1	XM_021870847	1207	0	PREDICTED: Chenopodium quinoa auxin response factor 3-like (LOC110693686), mRNA	K14486	K14486, ARF	auxin response factor	http://www.genome.jp/dbget-bin/www_bget?ko:K14486	O23661	1367	3e-149	Auxin response factor 3 OS=Arabidopsis thaliana OX=3702 GN=ARF3 PE=1 SV=2	PF06507//PF02362	Auxin response factor//B3 DNA binding domain	GO:0009725//GO:0006355	response to hormone//regulation of transcription, DNA-templated	GO:0003677	DNA binding	GO:0005634	nucleus	--	--	DOWN	-1.5006	1.364e-55	blast,frame:-2 start:2628 end:400
Cluster-3181.2239-2F	FAR1	FAR1	Cluster-3181.2239	731377003	XP_010667744.1	840	9.8e-87	PREDICTED: protein FAR1-RELATED SEQUENCE 6-like [Beta vulgaris subsp. vulgaris]	--	--	--	--	--	--	--	--	--	Q9SWG3	283	1.4e-23	Protein FAR-RED IMPAIRED RESPONSE 1 OS=Arabidopsis thaliana OX=3702 GN=FAR1 PE=1 SV=1	PF08138//PF04434	Sex peptide (SP) family//SWIM zinc finger	GO:0007165//GO:0046008	signal transduction//regulation of female receptivity, post-mating	GO:0005179//GO:0008270	hormone activity//zinc ion binding	GO:0005576	extracellular region	--	--	UP	10.35	8.7576e-17	blast,frame:1 start:1126 end:1410|blast,frame:3 start:321 end:1232|blast,frame:2 start:1499 end:2566
Cluster-3181.22782-2R	GNAT	GNAT	Cluster-3181.22782	902126572	KNA04130.1	1033	1.4e-109	hypothetical protein SOVF_202490 [Spinacia oleracea]	--	--	--	--	--	--	--	--	--	--	--	--	--	PF13508//PF02845//PF00583//PF13673//PF08445	Acetyltransferase (GNAT) domain//CUE domain//Acetyltransferase (GNAT) family//Acetyltransferase (GNAT) domain//FR47-like protein	GO:0042967	obsolete acyl-carrier-protein biosynthetic process	GO:0005515//GO:0008080//GO:0016747	protein binding//N-acetyltransferase activity//transferase activity, transferring acyl groups other than amino-acyl groups	--	--	--	--	UP	1.4367	3.5248e-38	blast,frame:-3 start:1161 end:262
Cluster-3181.23274-1R	AP2/ERF-ERF	AP2/ERF->AP2/ERF-ERF	Cluster-3181.23274	1219079388	XP_021765822.1	428	3e-39	ethylene-responsive transcription factor ERF104-like [Chenopodium quinoa]	CP027620.1	CP027620	53	8.61282e-17	Linum usitatissimum chromosome Lu10	K09286	EREBP	EREBP-like factor	http://www.genome.jp/dbget-bin/www_bget?ko:K09286	Q9FKG1	276	4.9e-23	Ethylene-responsive transcription factor ERF104 OS=Arabidopsis thaliana OX=3702 GN=ERF104 PE=1 SV=1	PF02499	Probable DNA packing protein, C-terminus	GO:0006323	DNA packaging	--	--	--	--	--	--	DOWN	-3.0867	0	blast,frame:-1 start:1711 end:1037|blast,frame:-2 start:1074 end:523
Cluster-3181.23276-1R	LIM	LIM	Cluster-3181.23276	1226837155	XP_021866988.1	628	2.3e-62	LIM domain-containing protein WLIM2b-like [Spinacia oleracea]	XM_021876712.1	XM_021876712	297	2.3535e-152	PREDICTED: Chenopodium quinoa LIM domain-containing protein WLIM2b-like (LOC110699222), mRNA	K09377	CSRP	cysteine and glycine-rich protein	http://www.genome.jp/dbget-bin/www_bget?ko:K09377	Q9M047	523	1.3e-51	LIM domain-containing protein WLIM2b OS=Arabidopsis thaliana OX=3702 GN=WLIM2B PE=1 SV=1	PF09768//PF05197//PF06397	Peptidase M76 family//TRIC channel//Desulfoferrodoxin, N-terminal domain	GO:0015672//GO:0006812	monovalent inorganic cation transport//cation transport	GO:0005261//GO:0005506//GO:0004222	cation channel activity//iron ion binding//metalloendopeptidase activity	GO:0016020	membrane	--	--	UP	1.2772	2.3336e-54	blast,frame:-2 start:1803 end:1354
Cluster-3181.2346-1F	Trihelix	Trihelix	Cluster-3181.2346	1226788765	XP_021843696.1	240	8e-18	trihelix transcription factor ASIL2-like [Spinacia oleracea]	--	--	--	--	--	--	--	--	--	Q9LJG8	146	2.4e-08	Trihelix transcription factor ASIL2 OS=Arabidopsis thaliana OX=3702 GN=ASIL2 PE=1 SV=1	--	--	--	--	--	--	--	--	--	--	UP	8.2329	2.887e-10	blast,frame:2 start:380 end:625
Cluster-3181.23536-0F	WRKY	WRKY	Cluster-3181.23536	1219072289	XP_021762133.1	206	1.7e-13	WRKY transcription factor WRKY51-like [Chenopodium quinoa]	CP027626.1	CP027626	69	1.13952e-25	Linum usitatissimum chromosome Lu2	--	--	--	--	Q9SV15	190	4.7e-13	Probable WRKY transcription factor 11 OS=Arabidopsis thaliana OX=3702 GN=WRKY11 PE=2 SV=2	PF03106	WRKY DNA -binding domain	GO:0006355	regulation of transcription, DNA-templated	GO:0003700//GO:0043565	DNA-binding transcription factor activity//sequence-specific DNA binding	GO:0005667	transcription regulator complex	--	--	DOWN	-3.1116	6.9505e-49	--
Cluster-3181.23784-1F	AP2/ERF-ERF	AP2/ERF->AP2/ERF-ERF	Cluster-3181.23784	731323356	XP_010672391.1	833	1.7e-86	PREDICTED: AP2-like ethylene-responsive transcription factor At2g41710 [Beta vulgaris subsp. vulgaris]	XM_021983772.1	XM_021983772	426	0	PREDICTED: Spinacia oleracea AP2-like ethylene-responsive transcription factor At2g41710 (LOC110779236), mRNA	K09285	OVM, ANT	AP2-like factor, ANT lineage	http://www.genome.jp/dbget-bin/www_bget?ko:K09285	Q8GWK2	657	1.7e-67	AP2-like ethylene-responsive transcription factor At2g41710 OS=Arabidopsis thaliana OX=3702 GN=At2g41710 PE=2 SV=2	PF04138//PF00847	GtrA-like protein//AP2 domain	GO:0000271//GO:0006355	polysaccharide biosynthetic process//regulation of transcription, DNA-templated	GO:0003700	DNA-binding transcription factor activity	GO:0016021//GO:0005667	integral component of membrane//transcription regulator complex	--	--	DOWN	-2.0618	7.101e-14	blast,frame:2 start:203 end:931
Cluster-3181.24269-0F	AP2/ERF-ERF	AP2/ERF->AP2/ERF-ERF	Cluster-3181.24269	870860621	KMT11929.1	1034	1.8e-109	hypothetical protein BVRB_5g098930 [Beta vulgaris subsp. vulgaris]	XM_021901960.1	XM_021901960	248	3.70751e-125	PREDICTED: Chenopodium quinoa ethylene-responsive transcription factor ERF061-like (LOC110722682), mRNA	--	--	--	--	Q9C7W2	391	2.4e-36	Ethylene-responsive transcription factor ERF061 OS=Arabidopsis thaliana OX=3702 GN=ERF061 PE=2 SV=1	PF07941//PF00847	Potassium channel Kv1.4 tandem inactivation domain//AP2 domain	GO:0006355//GO:0006813	regulation of transcription, DNA-templated//potassium ion transport	GO:0003700//GO:0030955//GO:0005249	DNA-binding transcription factor activity//potassium ion binding//voltage-gated potassium channel activity	GO:0008076//GO:0016021//GO:0005667	voltage-gated potassium channel complex//integral component of membrane//transcription regulator complex	--	--	UP	2.3206	2.1917e-291	blast,frame:1 start:373 end:1524
Cluster-3181.24752-0R	GRAS	GRAS	Cluster-3181.24752	731329977	XP_010675879.1	2080	1.4e-230	PREDICTED: scarecrow-like protein 21 [Beta vulgaris subsp. vulgaris]	XM_021883869.1	XM_021883869	821	0	PREDICTED: Chenopodium quinoa scarecrow-like protein 21 (LOC110705950), mRNA	--	--	--	--	Q9LDL7	1485	5.2e-163	Scarecrow-like transcription factor PAT1 OS=Arabidopsis thaliana OX=3702 GN=PAT1 PE=2 SV=1	--	--	--	--	--	--	--	--	--	--	DOWN	-2.4563	0	blast,frame:-1 start:2898 end:1312
Cluster-3181.25209-2F	DBP	DBP	Cluster-3181.25209	1219165310	XP_021746288.1	1683	1.4e-184	probable protein phosphatase 2C 22 isoform X2 [Chenopodium quinoa]	XM_021902433.1	XM_021902433	792	0	PREDICTED: Chenopodium quinoa probable protein phosphatase 2C 22 (LOC110723124), transcript variant X2, mRNA	K14803	PTC2_3	protein phosphatase PTC2/3	http://www.genome.jp/dbget-bin/www_bget?ko:K14803	Q9SLA1	1263	2.6e-137	Probable protein phosphatase 2C 22 OS=Arabidopsis thaliana OX=3702 GN=At2g25620 PE=1 SV=1	PF00481	Protein phosphatase 2C	--	--	GO:0003824	catalytic activity	--	--	KOG0698	Serine/threonine protein phosphatase	UP	2.0991	3.9686e-100	blast,frame:3 start:1107 end:2264
Cluster-3181.25463-0R	C3H	C3H	Cluster-3181.25463	1219138197	XP_021732480.1	1039	3.8e-110	zinc finger CCCH domain-containing protein 47-like [Chenopodium quinoa]	--	--	--	--	--	--	--	--	--	Q9LUZ4	683	2.8e-70	Zinc finger CCCH domain-containing protein 66 OS=Arabidopsis thaliana OX=3702 GN=At5g58620 PE=2 SV=1	PF00642//PF15761//PF12090	Zinc finger C-x8-C-x5-C-x3-H type (and similar)//Immortalisation up-regulated protein//Spt20 family	--	--	GO:0046872//GO:0003712	metal ion binding//transcription coregulator activity	GO:0005634//GO:0005667//GO:0000124	nucleus//transcription regulator complex//SAGA complex	--	--	DOWN	-2.0499	0	--
Cluster-3181.2603-1R	PHD	PHD	Cluster-3181.2603	870853150	KMT05031.1	4125	0	hypothetical protein BVRB_7g171910 [Beta vulgaris subsp. vulgaris]	XM_010687225.2	XM_010687225	1084	0	PREDICTED: Beta vulgaris subsp. vulgaris hypothetical protein (LOC104899934), mRNA	--	--	--	--	F4IXE7	682	1e-69	Increased DNA methylation 1 OS=Arabidopsis thaliana OX=3702 GN=IDM1 PE=1 SV=1	PF00583	Acetyltransferase (GNAT) family	GO:0042967	obsolete acyl-carrier-protein biosynthetic process	GO:0008080	N-acetyltransferase activity	--	--	--	--	DOWN	-1.3871	2.7318e-16	blast,frame:-2 start:4197 end:373
Cluster-3181.26407-0F	GARP-G2-like	GARP->GARP-G2-like	Cluster-3181.26407	731324940	XP_010673243.1	745	7.4e-76	PREDICTED: myb family transcription factor PHL7 isoform X2 [Beta vulgaris subsp. vulgaris]	XM_010674941.2	XM_010674941	336	5.7987e-174	PREDICTED: Beta vulgaris subsp. vulgaris myb family transcription factor PHL7 (LOC104889667), transcript variant X2, mRNA	--	--	--	--	Q9SJW0	452	2.6e-43	Myb family transcription factor PHL7 OS=Arabidopsis thaliana OX=3702 GN=PHL7 PE=2 SV=1	PF09000	Cytotoxic	GO:0009405	pathogenesis	GO:0043022//GO:0016788//GO:0003723	ribosome binding//hydrolase activity, acting on ester bonds//RNA binding	--	--	--	--	UP	1.1079	1.7789e-46	blast,frame:1 start:559 end:1176
Cluster-3181.26585-0R	HB-BELL	HB->HB-BELL	Cluster-3181.26585	1219114528	XP_021720564.1	2292	4.5e-255	BEL1-like homeodomain protein 1 [Chenopodium quinoa]	XM_021864872.1	XM_021864872	710	0	PREDICTED: Chenopodium quinoa BEL1-like homeodomain protein 1 (LOC110688164), mRNA	--	--	--	--	Q9SJ56	829	7.6e-87	BEL1-like homeodomain protein 1 OS=Arabidopsis thaliana OX=3702 GN=BLH1 PE=1 SV=1	PF05920//PF00046	Homeobox KN domain//Homeodomain	GO:0006355	regulation of transcription, DNA-templated	GO:0003677	DNA binding	--	--	--	--	DOWN	-2.5805	0	--
Cluster-3181.27235-2R	C2C2-Dof	C2C2->C2C2-Dof	Cluster-3181.27235	870846753	KMS99249.1	1674	1.4e-183	hypothetical protein BVRB_2g046860 [Beta vulgaris subsp. vulgaris]	XM_010694950.1	XM_010694950	677	0	PREDICTED: Beta vulgaris subsp. vulgaris cyclic dof factor 2 (LOC104906222), transcript variant X1, mRNA	--	--	--	--	Q93ZL5	731	1.2e-75	Cyclic dof factor 2 OS=Arabidopsis thaliana OX=3702 GN=CDF2 PE=1 SV=2	PF02465//PF02701	Flagellar hook-associated protein 2 N-terminus//Dof domain, zinc finger	GO:0006355	regulation of transcription, DNA-templated	GO:0003677	DNA binding	GO:0009424	bacterial-type flagellum hook	--	--	DOWN	-1.098	1.6882e-29	blast,frame:-3 start:2142 end:532
Cluster-3181.28179-0F	RWP-RK	RWP-RK	Cluster-3181.28179	1219165256	XP_021746259.1	329	1.5e-27	uncharacterized protein LOC110712140 isoform X1 [Chenopodium quinoa]	--	--	--	--	--	--	--	--	--	Q84TH9	131	5.1e-06	Protein NLP7 OS=Arabidopsis thaliana OX=3702 GN=NLP7 PE=1 SV=2	PF00564//PF02902//PF00240	PB1 domain//Ulp1 protease family, C-terminal catalytic domain//Ubiquitin family	GO:0006508	proteolysis	GO:0008234//GO:0005515	cysteine-type peptidase activity//protein binding	--	--	--	--	DOWN	-1.3862	3.9056e-14	blast,frame:1 start:1 end:2607
Cluster-3181.28180-0R	RWP-RK	RWP-RK	Cluster-3181.28180	1219063190	XP_021757483.1	368	2.6e-32	protein lap4-like [Chenopodium quinoa]	--	--	--	--	--	--	--	--	--	Q5NB82	181	4.8e-12	Protein NLP3 OS=Oryza sativa subsp. japonica OX=39947 GN=NLP3 PE=3 SV=1	PF00564//PF04545//PF08281//PF05225//PF13404//PF13855//PF01418	PB1 domain//Sigma-70, region 4//Sigma-70, region 4//helix-turn-helix, Psq domain//AsnC-type helix-turn-helix domain//Leucine rich repeat//Helix-turn-helix domain, rpiR family	GO:0006355//GO:0006352	regulation of transcription, DNA-templated//DNA-templated transcription, initiation	GO:0043565//GO:0005515//GO:0003677//GO:0016987//GO:0003700	sequence-specific DNA binding//protein binding//DNA binding//sigma factor activity//DNA-binding transcription factor activity	GO:0005667	transcription regulator complex	--	--	DOWN	-4.296	1.8019e-25	--
Cluster-3181.30613-0F	C2H2	C2H2	Cluster-3181.30613	1226851935	XP_021839462.1	1463	2.8e-159	nucleolar transcription factor 1-A [Spinacia oleracea]	XM_021983770.1	XM_021983770	473	0	PREDICTED: Spinacia oleracea nucleolar transcription factor 1-A (LOC110779238), mRNA	--	--	--	--	--	--	--	--	PF00096	Zinc finger, C2H2 type	--	--	GO:0003676	nucleic acid binding	--	--	--	--	DOWN	-1.4855	2.7083e-08	blast,frame:1 start:1 end:984
Cluster-3181.3186-1F	MYB	MYB->MYB	Cluster-3181.3186	731374667	XP_010667031.1	666	3.4e-67	PREDICTED: transcription factor MYB114-like [Beta vulgaris subsp. vulgaris]	XM_010668729.1	XM_010668729	278	3.14489e-142	PREDICTED: Beta vulgaris subsp. vulgaris transcription factor MYB114-like (LOC104884133), mRNA	K09422	MYBP	myb proto-oncogene protein, plant	http://www.genome.jp/dbget-bin/www_bget?ko:K09422	A0A4D6Q5I0	470	6.9e-46	Transcription factor MYB4 OS=Crocosmia x crocosmiiflora OX=1053288 GN=MYB4 PE=2 SV=1	--	--	--	--	--	--	--	--	--	--	UP	2.6517	0.0068197	blast,frame:2 start:2 end:523
Cluster-3181.32109-2R	OFP	OFP	Cluster-3181.32109	1219156076	XP_021741533.1	509	7.9e-49	transcription repressor OFP8-like [Chenopodium quinoa]	XM_021995531.1	XM_021995531	291	2.75737e-149	PREDICTED: Spinacia oleracea transcription repressor OFP8-like (LOC110790762), mRNA	--	--	--	--	Q3E9B4	235	1.8e-18	Transcription repressor OFP8 OS=Arabidopsis thaliana OX=3702 GN=OFP8 PE=1 SV=1	PF07469	Domain of unknown function (DUF1518)	--	--	--	--	GO:0005634	nucleus	--	--	UP	1.2292	5.9588e-14	blast,frame:-3 start:1148 end:33
Cluster-3181.32563-1F	GNAT	GNAT	Cluster-3181.32563	731337182	XP_010679651.1	1730	7.3e-190	PREDICTED: probable amino-acid acetyltransferase NAGS2, chloroplastic isoform X1 [Beta vulgaris subsp. vulgaris]	XR_002536764.1	XR_002536764	727	0	PREDICTED: Spinacia oleracea probable amino-acid acetyltransferase NAGS2, chloroplastic (LOC110800819), transcript variant X2, misc_RNA	K14682	argAB	amino-acid N-acetyltransferase	http://www.genome.jp/dbget-bin/www_bget?ko:K14682	B5X4Z4	1282	2.5e-139	Probable amino-acid acetyltransferase NAGS2, chloroplastic OS=Arabidopsis thaliana OX=3702 GN=NAGS2 PE=1 SV=1	PF03632//PF00583//PF13673//PF13508//PF12242	Glycosyl hydrolase family 65 central catalytic domain//Acetyltransferase (GNAT) family//Acetyltransferase (GNAT) domain//Acetyltransferase (GNAT) domain//NAD(P)H binding domain of trans-2-enoyl-CoA reductase	GO:0055114//GO:0042967//GO:0005975	oxidation-reduction process//obsolete acyl-carrier-protein biosynthetic process//carbohydrate metabolic process	GO:0008080//GO:0003824//GO:0016491	N-acetyltransferase activity//catalytic activity//oxidoreductase activity	--	--	KOG2436	Acetylglutamate kinase/acetylglutamate synthase	UP	4.4084	0	blast,frame:2 start:2057 end:2431|blast,frame:3 start:111 end:1505
Cluster-3181.3286-2F	B3	B3->B3	Cluster-3181.3286	731328660	XP_010675172.1	1350	4.6e-146	PREDICTED: B3 domain-containing protein REM16 isoform X2 [Beta vulgaris subsp. vulgaris]	XM_021887204.1	XM_021887204	151	3.53448e-71	PREDICTED: Chenopodium quinoa B3 domain-containing protein Os12g0592300-like (LOC110708973), mRNA	--	--	--	--	Q8RYD1	332	1.9e-29	B3 domain-containing protein REM16 OS=Arabidopsis thaliana OX=3702 GN=REM16 PE=2 SV=1	PF02362	B3 DNA binding domain	--	--	GO:0003677	DNA binding	--	--	--	--	UP	1.1133	0.0012195	blast,frame:3 start:207 end:2003
Cluster-3181.33858-2F	AP2/ERF-ERF	AP2/ERF->AP2/ERF-ERF	Cluster-3181.33858	1219114206	XP_021720392.1	324	8e-28	ethylene-responsive transcription factor RAP2-12-like [Chenopodium quinoa]	XM_021864701.1	XM_021864701	144	4.8888e-68	PREDICTED: Chenopodium quinoa ethylene-responsive transcription factor RAP2-12-like (LOC110688032), transcript variant X2, mRNA	K09286	EREBP	EREBP-like factor	http://www.genome.jp/dbget-bin/www_bget?ko:K09286	Q6K7E6	268	9.5e-23	Ethylene-responsive transcription factor 1 OS=Oryza sativa subsp. japonica OX=39947 GN=EREBP1 PE=1 SV=1	--	--	--	--	--	--	--	--	--	--	UP	4.448	2.7133e-45	--
Cluster-3181.34460-0F	MBF1	MBF1	Cluster-3181.34460	1219156149	XP_021741569.1	619	1.9e-61	multiprotein-bridging factor 1c-like [Chenopodium quinoa]	--	--	--	--	--	K03627	MBF1	putative transcription factor	http://www.genome.jp/dbget-bin/www_bget?ko:K03627	Q9LV58	477	2.1e-46	Multiprotein-bridging factor 1c OS=Arabidopsis thaliana OX=3702 GN=MBF1C PE=1 SV=1	PF10163	Transcription factor e(y)2	GO:0006406//GO:0045893	mRNA export from nucleus//positive regulation of transcription, DNA-templated	GO:0003713	transcription coactivator activity	GO:0005643//GO:0005667//GO:0000124	nuclear pore//transcription regulator complex//SAGA complex	KOG3398	Transcription factor MBF1	UP	1.6704	3.4259e-22	blast,frame:1 start:706 end:1212
Cluster-3181.35332-2F	Jumonji	Jumonji	Cluster-3181.35332	1226804875	XP_021851759.1	159	1e-08	lysine-specific demethylase JMJ25 [Spinacia oleracea]	--	--	--	--	--	K15601	KDM3	lysine-specific demethylase 3	http://www.genome.jp/dbget-bin/www_bget?ko:K15601	Q9SSE9	124	4.4e-06	Lysine-specific demethylase JMJ25 OS=Arabidopsis thaliana OX=3702 GN=JMJ25 PE=1 SV=1	--	--	--	--	--	--	--	--	--	--	UP	9.7741	2.8195e-14	blast,frame:3 start:3 end:230
Cluster-3181.35779-0R	AP2/ERF-AP2	AP2/ERF->AP2/ERF-AP2	Cluster-3181.35779	1226800383	XP_021849481.1	1004	4.3e-106	AP2-like ethylene-responsive transcription factor At1g79700 isoform X1 [Spinacia oleracea]	XM_021894417.1	XM_021894417	366	0	PREDICTED: Chenopodium quinoa AP2-like ethylene-responsive transcription factor At1g79700 (LOC110715802), mRNA	K09285	OVM, ANT	AP2-like factor, ANT lineage	http://www.genome.jp/dbget-bin/www_bget?ko:K09285	Q94AN4	753	2.1e-78	AP2-like ethylene-responsive transcription factor At1g16060 OS=Arabidopsis thaliana OX=3702 GN=At1g16060 PE=2 SV=1	PF00268//PF00847	Ribonucleotide reductase, small chain//AP2 domain	GO:0006355//GO:0009263	regulation of transcription, DNA-templated//deoxyribonucleotide biosynthetic process	GO:0003700	DNA-binding transcription factor activity	GO:0005667	transcription regulator complex	--	--	DOWN	-1.387	2.5752e-05	blast,frame:-1 start:1569 end:313
Cluster-3181.35790-2R	GARP-G2-like	GARP->GARP-G2-like	Cluster-3181.35790	731322999	XP_010672196.1	1779	1.7e-195	PREDICTED: putative disease resistance RPP13-like protein 1 [Beta vulgaris subsp. vulgaris]	XM_010673894.2	XM_010673894	450	0	PREDICTED: Beta vulgaris subsp. vulgaris putative disease resistance RPP13-like protein 1 (LOC104888807), mRNA	--	--	--	--	Q9LRR5	496	3.8e-48	Putative disease resistance protein At3g14460 OS=Arabidopsis thaliana OX=3702 GN=At3g14460 PE=3 SV=1	PF13855//PF07700	Leucine rich repeat//Haem-NO-binding	--	--	GO:0020037//GO:0005515	heme binding//protein binding	--	--	--	--	UP	1.0063	1.8339e-06	blast,frame:-3 start:4483 end:467
Cluster-3181.35953-0R	MYB	MYB->MYB	Cluster-3181.35953	731328621	XP_010675151.1	1075	2.1e-114	PREDICTED: transcription repressor MYB6 [Beta vulgaris subsp. vulgaris]	XM_021886417.1	XM_021886417	344	1.05999e-178	PREDICTED: Chenopodium quinoa transcription repressor MYB6-like (LOC110708316), mRNA	K09422	MYBP	myb proto-oncogene protein, plant	http://www.genome.jp/dbget-bin/www_bget?ko:K09422	P81395	673	3.2e-69	Myb-related protein 330 OS=Antirrhinum majus OX=4151 GN=MYB330 PE=2 SV=1	PF09111	SLIDE	GO:0006338	chromatin remodeling	GO:0016818//GO:0003676//GO:0005524	hydrolase activity, acting on acid anhydrides, in phosphorus-containing anhydrides//nucleic acid binding//ATP binding	GO:0005634	nucleus	--	--	DOWN	-1.0598	0.00020055	blast,frame:-1 start:1144 end:161
Cluster-3181.37086-1R	bHLH	bHLH	Cluster-3181.37086	731343791	XP_010683069.1	809	1.7e-83	PREDICTED: transcription factor bHLH18-like [Beta vulgaris subsp. vulgaris]	XM_018958221.1	XM_018958221	45	2.08115e-12	PREDICTED: Juglans regia transcription factor bHLH25-like (LOC108985799), mRNA	--	--	--	--	Q9T072	395	6.7e-37	Transcription factor bHLH25 OS=Arabidopsis thaliana OX=3702 GN=BHLH25 PE=2 SV=2	PF00010//PF03387	Helix-loop-helix DNA-binding domain//Herpesvirus UL46 protein	GO:0006355	regulation of transcription, DNA-templated	GO:0046983	protein dimerization activity	--	--	--	--	DOWN	-1.452	1.025e-10	blast,frame:-2 start:1380 end:259
Cluster-3181.37472-1F	B3	B3->B3	Cluster-3181.37472	731328662	XP_010675173.1	646	2.3e-64	PREDICTED: B3 domain-containing protein REM16 isoform X3 [Beta vulgaris subsp. vulgaris]	--	--	--	--	--	--	--	--	--	Q8RYD1	284	8.2e-24	B3 domain-containing protein REM16 OS=Arabidopsis thaliana OX=3702 GN=REM16 PE=2 SV=1	PF02362	B3 DNA binding domain	--	--	GO:0003677	DNA binding	--	--	--	--	UP	2.4043	7.0994e-50	--
Cluster-3181.37717-1R	WRKY	WRKY	Cluster-3181.37717	1219086520	XP_021769440.1	740	3.3e-75	probable WRKY transcription factor 40 [Chenopodium quinoa]	XM_010669209.2	XM_010669209	281	2.60926e-143	PREDICTED: Beta vulgaris subsp. vulgaris probable WRKY transcription factor 40 (LOC104884530), mRNA	--	--	--	--	Q9SAH7	329	5.8e-29	Probable WRKY transcription factor 40 OS=Arabidopsis thaliana OX=3702 GN=WRKY40 PE=1 SV=1	PF01496//PF03106	V-type ATPase 116kDa subunit family//WRKY DNA -binding domain	GO:0006355//GO:1902600	regulation of transcription, DNA-templated//proton transmembrane transport	GO:0003700//GO:0043565//GO:0015078	DNA-binding transcription factor activity//sequence-specific DNA binding//proton transmembrane transporter activity	GO:0033179//GO:0005667	proton-transporting V-type ATPase, V0 domain//transcription regulator complex	--	--	UP	1.6425	1.0611e-29	blast,frame:-3 start:808 end:323
Cluster-3181.37717-2R	WRKY	WRKY	Cluster-3181.37717	1219086520	XP_021769440.1	740	3.3e-75	probable WRKY transcription factor 40 [Chenopodium quinoa]	XM_010669209.2	XM_010669209	281	2.60926e-143	PREDICTED: Beta vulgaris subsp. vulgaris probable WRKY transcription factor 40 (LOC104884530), mRNA	--	--	--	--	Q9SAH7	329	5.8e-29	Probable WRKY transcription factor 40 OS=Arabidopsis thaliana OX=3702 GN=WRKY40 PE=1 SV=1	PF01496//PF03106	V-type ATPase 116kDa subunit family//WRKY DNA -binding domain	GO:0006355//GO:1902600	regulation of transcription, DNA-templated//proton transmembrane transport	GO:0003700//GO:0043565//GO:0015078	DNA-binding transcription factor activity//sequence-specific DNA binding//proton transmembrane transporter activity	GO:0033179//GO:0005667	proton-transporting V-type ATPase, V0 domain//transcription regulator complex	--	--	UP	1.6425	1.0611e-29	blast,frame:-3 start:808 end:323
Cluster-3181.38208-0R	WRKY	WRKY	Cluster-3181.38208	1226823867	XP_021861126.1	3001	0	probable disease resistance protein At4g27220 [Spinacia oleracea]	XM_022005434.1	XM_022005434	1019	0	PREDICTED: Spinacia oleracea probable disease resistance protein At4g27220 (LOC110800143), mRNA	--	--	--	--	Q42484	512	4.2e-50	Disease resistance protein RPS2 OS=Arabidopsis thaliana OX=3702 GN=RPS2 PE=1 SV=1	PF13855//PF03106//PF13008//PF00931	Leucine rich repeat//WRKY DNA -binding domain//Zinc-binding domain of Paramyxoviridae V protein//NB-ARC domain	GO:0006355	regulation of transcription, DNA-templated	GO:0005515//GO:0043565//GO:0043531//GO:0046872//GO:0003700	protein binding//sequence-specific DNA binding//ADP binding//metal ion binding//DNA-binding transcription factor activity	GO:0005667	transcription regulator complex	--	--	DOWN	-1.814	6.8037e-18	blast,frame:-1 start:3402 end:1
Cluster-3181.38499-0F	FAR1	FAR1	Cluster-3181.38499	731333378	XP_010677702.1	1348	1.4e-145	PREDICTED: protein FAR1-RELATED SEQUENCE 6-like [Beta vulgaris subsp. vulgaris]	XM_021911867.1	XM_021911867	52	7.12584e-16	PREDICTED: Chenopodium quinoa uncharacterized LOC110731950 (LOC110731950), transcript variant X2, mRNA	--	--	--	--	Q9SWG3	654	1.6e-66	Protein FAR-RED IMPAIRED RESPONSE 1 OS=Arabidopsis thaliana OX=3702 GN=FAR1 PE=1 SV=1	PF07936//PF04434//PF06663	Potassium-channel blocking toxin//SWIM zinc finger//Protein of unknown function (DUF1170)	GO:0009405//GO:0009966//GO:0006810	pathogenesis//regulation of signal transduction//transport	GO:0090729//GO:0008270//GO:0008200	toxin activity//zinc ion binding//ion channel inhibitor activity	GO:0042151//GO:0005737//GO:0016020	nematocyst//cytoplasm//membrane	--	--	UP	8.5687	5.5711e-30	blast,frame:1 start:505 end:1248
Cluster-3181.38728-0F	PHD	PHD	Cluster-3181.38728	1219158247	XP_021742631.1	1403	3.7e-152	uncharacterized protein LOC110708731 [Chenopodium quinoa]	XM_019248910.1	XM_019248910	566	0	PREDICTED: Beta vulgaris subsp. vulgaris uncharacterized LOC104890385 (LOC104890385), mRNA	--	--	--	--	Q9V8P9	139	5.2e-07	E3 ubiquitin-protein ligase Topors OS=Drosophila melanogaster OX=7227 GN=Topors PE=1 SV=1	PF00727//PF12861//PF00097//PF16685//PF00453//PF12678	Interleukin 4//Anaphase-promoting complex subunit 11 RING-H2 finger//Zinc finger, C3HC4 type (RING finger)//zinc RING finger of MSL2//Ribosomal protein L20//RING-H2 zinc finger domain	GO:0006412//GO:0040007//GO:0006955//GO:0007165//GO:0008283//GO:0042254//GO:0016567	translation//growth//immune response//signal transduction//cell population proliferation//ribosome biogenesis//protein ubiquitination	GO:0046872//GO:0061630//GO:0008270//GO:0008083//GO:0004842//GO:0003735//GO:0005136//GO:0019843	metal ion binding//ubiquitin protein ligase activity//zinc ion binding//growth factor activity//ubiquitin-protein transferase activity//structural constituent of ribosome//interleukin-4 receptor binding//rRNA binding	GO:0005680//GO:0005576//GO:0016516//GO:0005840	anaphase-promoting complex//extracellular region//interleukin-4 receptor complex//ribosome	--	--	UP	1.1308	2.5942e-27	blast,frame:3 start:3 end:932
Cluster-3181.40711-1F	bHLH	bHLH	Cluster-3181.40711	1226780220	XP_021855535.1	923	1.2e-96	transcription factor bHLH14-like [Spinacia oleracea]	XM_019249481.1	XM_019249481	84	5.1461e-34	PREDICTED: Beta vulgaris subsp. vulgaris transcription factor bHLH14-like (LOC104892626), transcript variant X1, mRNA	--	--	--	--	Q39204	318	6.7e-28	Transcription factor MYC2 OS=Arabidopsis thaliana OX=3702 GN=MYC2 PE=1 SV=2	PF00010	Helix-loop-helix DNA-binding domain	--	--	GO:0046983	protein dimerization activity	--	--	--	--	UP	1.4997	1.2447e-17	blast,frame:2 start:113 end:1414
Cluster-3181.41333-0R	FAR1	FAR1	Cluster-3181.41333	1219121298	XP_021723943.1	2082	1.5e-230	protein FAR-RED IMPAIRED RESPONSE 1-like [Chenopodium quinoa]	XM_021868251.1	XM_021868251	618	0	PREDICTED: Chenopodium quinoa protein FAR-RED IMPAIRED RESPONSE 1-like (LOC110691332), mRNA	--	--	--	--	Q9LIE5	736	6.9e-76	Protein FAR-RED ELONGATED HYPOCOTYL 3 OS=Arabidopsis thaliana OX=3702 GN=FHY3 PE=1 SV=1	PF04434	SWIM zinc finger	--	--	GO:0008270	zinc ion binding	--	--	--	--	UP	1.0183	8.5953e-13	blast,frame:-1 start:5225 end:2865
Cluster-3181.42720-0R	bZIP	bZIP	Cluster-3181.42720	1219111961	XP_021719233.1	840	4e-87	basic leucine zipper 34-like isoform X2 [Chenopodium quinoa]	XM_021863541.1	XM_021863541	279	1.55384e-142	PREDICTED: Chenopodium quinoa basic leucine zipper 34-like (LOC110686927), transcript variant X2, mRNA	--	--	--	--	Q9M2K4	453	1.1e-43	Basic leucine zipper 61 OS=Arabidopsis thaliana OX=3702 GN=BZIP61 PE=1 SV=1	PF04888//PF06156//PF07716//PF03131//PF06687//PF17257//PF00434//PF00170	Secretion system effector C (SseC) like family//Initiation control protein YabA//Basic region leucine zipper//bZIP Maf transcription factor//SUR7/PalI family//Family of unknown function (DUF5323)//Glycoprotein VP7//bZIP transcription factor	GO:0006412//GO:0009405//GO:0006355//GO:0042254//GO:0006260	translation//pathogenesis//regulation of transcription, DNA-templated//ribosome biogenesis//DNA replication	GO:0003735//GO:0003677//GO:0003700//GO:0019843	structural constituent of ribosome//DNA binding//DNA-binding transcription factor activity//rRNA binding	GO:0005840//GO:0005886//GO:0005667//GO:0009507//GO:0005634//GO:0019028	ribosome//plasma membrane//transcription regulator complex//chloroplast//nucleus//viral capsid	--	--	UP	3.1999	5.6481e-15	blast,frame:-1 start:1257 end:136
Cluster-3181.43081-0F	C2C2-Dof	C2C2->C2C2-Dof	Cluster-3181.43081	1219069998	XP_021760968.1	921	1.6e-96	dof zinc finger protein DOF1.2-like [Chenopodium quinoa]	XM_021905276.1	XM_021905276	321	6.9729e-166	PREDICTED: Chenopodium quinoa dof zinc finger protein DOF1.2-like (LOC110725807), mRNA	--	--	--	--	Q9SVC5	307	9.6e-27	Dof zinc finger protein DOF3.5 OS=Arabidopsis thaliana OX=3702 GN=DOF3.5 PE=3 SV=1	PF02701	Dof domain, zinc finger	GO:0006355	regulation of transcription, DNA-templated	GO:0003677	DNA binding	--	--	--	--	UP	1.6775	2.8587e-32	blast,frame:1 start:37 end:894
Cluster-3181.43578-2R	AP2/ERF-ERF	AP2/ERF->AP2/ERF-ERF	Cluster-3181.43578	731356447	XP_010689679.1	1139	1.5e-121	PREDICTED: ethylene-responsive transcription factor ERF054 [Beta vulgaris subsp. vulgaris]	XM_018614363.1	XM_018614363	53	1.2345e-16	PREDICTED: Raphanus sativus ethylene-responsive transcription factor ERF060 (LOC108841614), mRNA	--	--	--	--	Q9SKT1	520	3.5e-51	Ethylene-responsive transcription factor ERF053 OS=Arabidopsis thaliana OX=3702 GN=ERF053 PE=1 SV=1	PF00847//PF07817	AP2 domain//GLE1-like protein	GO:0006355//GO:0016973	regulation of transcription, DNA-templated//poly(A)+ mRNA export from nucleus	GO:0003700	DNA-binding transcription factor activity	GO:0005643//GO:0005667	nuclear pore//transcription regulator complex	--	--	UP	1.6304	8.0251e-23	blast,frame:-3 start:2169 end:889
Cluster-3181.43770-2F	FAR1	FAR1	Cluster-3181.43770	1108957690	XP_019106544.1	710	2.2e-72	PREDICTED: protein FAR1-RELATED SEQUENCE 5-like isoform X2 [Beta vulgaris subsp. vulgaris]	--	--	--	--	--	--	--	--	--	Q9SZL8	193	7.5e-14	Protein FAR1-RELATED SEQUENCE 5 OS=Arabidopsis thaliana OX=3702 GN=FRS5 PE=1 SV=1	PF06624	Ribosome associated membrane protein RAMP4	--	--	--	--	GO:0005783	endoplasmic reticulum	--	--	UP	5.7796	0.00057808	--
Cluster-3181.4452-0R	WRKY	WRKY	Cluster-3181.4452	1219153037	XP_021739996.1	1725	1.4e-189	probable WRKY transcription factor 3 [Chenopodium quinoa]	XM_021983345.1	XM_021983345	597	0	PREDICTED: Spinacia oleracea probable WRKY transcription factor 3 (LOC110778785), mRNA	--	--	--	--	Q9XI90	1017	6.5e-109	Probable WRKY transcription factor 4 OS=Arabidopsis thaliana OX=3702 GN=WRKY4 PE=1 SV=2	PF00895//PF03106//PF02950	ATP synthase protein 8//WRKY DNA -binding domain//Conotoxin	GO:0015986//GO:0009405//GO:0006355//GO:0006810	ATP synthesis coupled proton transport//pathogenesis//regulation of transcription, DNA-templated//transport	GO:0043565//GO:0015078//GO:0008200//GO:0003700	sequence-specific DNA binding//proton transmembrane transporter activity//ion channel inhibitor activity//DNA-binding transcription factor activity	GO:0005667//GO:0000276//GO:0005576	transcription regulator complex//mitochondrial proton-transporting ATP synthase complex, coupling factor F(o)//extracellular region	--	--	UP	1.1202	6.4576e-27	blast,frame:-1 start:1968 end:292
Cluster-3181.454-0F	mTERF	mTERF	Cluster-3181.454	1219119990	XP_021723280.1	1011	7.6e-107	transcription termination factor MTERF9, chloroplastic-like [Chenopodium quinoa]	XM_021883658.1	XM_021883658	122	3.78666e-55	PREDICTED: Chenopodium quinoa uncharacterized LOC110705738 (LOC110705738), mRNA	K15032	MTERFD	mTERF domain-containing protein, mitochondrial	http://www.genome.jp/dbget-bin/www_bget?ko:K15032	--	--	--	--	PF02536//PF00531	mTERF//Death domain	GO:0006355//GO:0007165	regulation of transcription, DNA-templated//signal transduction	GO:0003690//GO:0005515	double-stranded DNA binding//protein binding	--	--	--	--	UP	1.9141	6.7398e-05	blast,frame:1 start:73 end:1293
Cluster-3181.4645-0R	MYB-related	MYB->MYB-related	Cluster-3181.4645	1219151194	XP_021739087.1	428	3.1e-39	transcription factor MYB36-like [Chenopodium quinoa]	XM_021883395.1	XM_021883395	332	7.14728e-172	PREDICTED: Chenopodium quinoa transcription factor MYB36-like (LOC110705509), mRNA	K09422	MYBP	myb proto-oncogene protein, plant	http://www.genome.jp/dbget-bin/www_bget?ko:K09422	Q9FKL2	340	1.9e-30	Transcription factor MYB36 OS=Arabidopsis thaliana OX=3702 GN=MYB36 PE=1 SV=1	--	--	--	--	--	--	--	--	--	--	UP	1.5373	1.7994e-12	--
Cluster-3181.4854-2R	AUX/IAA	AUX/IAA	Cluster-3181.4854	1219120235	XP_021723406.1	561	7.3e-55	auxin-responsive protein IAA33-like [Chenopodium quinoa]	XM_021983453.1	XM_021983453	218	1.03354e-108	PREDICTED: Spinacia oleracea auxin-responsive protein IAA33 (LOC110778913), mRNA	--	--	--	--	Q9FKM7	350	8.2e-32	Auxin-responsive protein IAA33 OS=Arabidopsis thaliana OX=3702 GN=IAA33 PE=1 SV=1	--	--	--	--	--	--	--	--	--	--	DOWN	-2.4461	5.2912e-05	blast,frame:-3 start:930 end:334
Cluster-3181.5149-0F	MYB	MYB->MYB	Cluster-3181.5149	1219085888	XP_021769110.1	1649	9.5e-181	transcription factor MYB1-like [Chenopodium quinoa]	XM_010692105.2	XM_010692105	348	1.06772e-180	PREDICTED: Beta vulgaris subsp. vulgaris hypothetical protein (LOC104903953), mRNA	K09422	MYBP	myb proto-oncogene protein, plant	http://www.genome.jp/dbget-bin/www_bget?ko:K09422	Q42575	636	1.1e-64	Transcription factor MYB1 OS=Arabidopsis thaliana OX=3702 GN=MYB1 PE=2 SV=1	PF09111	SLIDE	GO:0006338	chromatin remodeling	GO:0003676//GO:0005524//GO:0016818	nucleic acid binding//ATP binding//hydrolase activity, acting on acid anhydrides, in phosphorus-containing anhydrides	GO:0005634	nucleus	--	--	UP	1.2588	1.366e-09	blast,frame:1 start:241 end:1593
Cluster-3181.5412-1R	MYB	MYB->MYB	Cluster-3181.5412	870844659	KMS97574.1	1235	6.7e-133	hypothetical protein BVRB_5g125450 [Beta vulgaris subsp. vulgaris]	XM_021909936.1	XM_021909936	468	0	PREDICTED: Chenopodium quinoa transcription factor MYB41-like (LOC110730159), mRNA	K09422	MYBP	myb proto-oncogene protein, plant	http://www.genome.jp/dbget-bin/www_bget?ko:K09422	Q8GWP0	675	2.2e-69	Transcription factor MYB39 OS=Arabidopsis thaliana OX=3702 GN=MYB39 PE=2 SV=1	PF00143	Interferon alpha/beta domain	GO:0007165//GO:0006952	signal transduction//defense response	GO:0005126	cytokine receptor binding	GO:0005576	extracellular region	--	--	DOWN	-2.7268	3.5325e-06	blast,frame:-2 start:1410 end:358
Cluster-3181.550-2F	GARP-G2-like	GARP->GARP-G2-like	Cluster-3181.550	870863822	KMT14969.1	385	4.4e-34	hypothetical protein BVRB_3g064740 isoform C [Beta vulgaris subsp. vulgaris]	XR_789596.2	XR_789596	226	8.73105e-113	PREDICTED: Beta vulgaris subsp. vulgaris protein PHR1-LIKE 2 (LOC104889694), transcript variant X3, misc_RNA	--	--	--	--	Q8LAJ7	283	1.1e-23	Protein PHR1-LIKE 3 OS=Arabidopsis thaliana OX=3702 GN=PHL3 PE=1 SV=1	PF12052	Voltage gated calcium channel subunit beta domain 4Aa N terminal	GO:0070588//GO:0006816	calcium ion transmembrane transport//calcium ion transport	GO:0005245	voltage-gated calcium channel activity	GO:0005891	voltage-gated calcium channel complex	--	--	DOWN	-1.1448	1.0121e-09	blast,frame:3 start:288 end:752|blast,frame:1 start:1762 end:2172
Cluster-3181.6830-2R	HSF	HSF	Cluster-3181.6830	1219088183	XP_021770292.1	1474	2.2e-160	heat stress transcription factor A-2c-like [Chenopodium quinoa]	XM_021914601.1	XM_021914601	651	0	PREDICTED: Chenopodium quinoa heat stress transcription factor A-2c-like (LOC110734445), transcript variant X2, mRNA	K09419	HSFF	heat shock transcription factor, other eukaryote	http://www.genome.jp/dbget-bin/www_bget?ko:K09419	Q9LUH8	911	1.6e-96	Heat stress transcription factor A-6b OS=Arabidopsis thaliana OX=3702 GN=HSFA6b PE=2 SV=1	PF00472//PF09726//PF00447	RF-1 domain//Macoilin family//HSF-type DNA-binding	GO:0006355//GO:0006415//GO:0023041//GO:0006449	regulation of transcription, DNA-templated//translational termination//neuronal signal transduction//regulation of translational termination	GO:0003747//GO:0043565//GO:0003700	translation release factor activity//sequence-specific DNA binding//DNA-binding transcription factor activity	GO:0042025//GO:0005667//GO:0030867//GO:0018444//GO:0005840	host cell nucleus//transcription regulator complex//rough endoplasmic reticulum membrane//translation release factor complex//ribosome	--	--	UP	2.1378	3.4682e-37	blast,frame:-3 start:2005 end:806
Cluster-3181.8612-1F	SRS	SRS	Cluster-3181.8612	870863429	KMT14593.1	871	1.4e-90	hypothetical protein BVRB_4g073630 [Beta vulgaris subsp. vulgaris]	XM_021878532.1	XM_021878532	369	0	PREDICTED: Chenopodium quinoa protein LATERAL ROOT PRIMORDIUM 1-like (LOC110700968), mRNA	--	--	--	--	Q94CK9	472	1e-45	Protein LATERAL ROOT PRIMORDIUM 1 OS=Arabidopsis thaliana OX=3702 GN=LRP1 PE=1 SV=1	PF04277//PF04906//PF06305	Oxaloacetate decarboxylase, gamma chain//Tweety//Lipopolysaccharide assembly protein A domain	GO:0006560//GO:0036376//GO:0006814//GO:0006090//GO:0006525	proline metabolic process//sodium ion export across plasma membrane//sodium ion transport//pyruvate metabolic process//arginine metabolic process	GO:0015081//GO:0008948	sodium ion transmembrane transporter activity//oxaloacetate decarboxylase activity	GO:0016021//GO:0005887//GO:0016020	integral component of membrane//integral component of plasma membrane//membrane	--	--	DOWN	-2.5911	6.5933e-14	blast,frame:2 start:542 end:1933
Cluster-3181.8614-0F	mTERF	mTERF	Cluster-3181.8614	870848070	KMT00359.1	616	1.4e-60	hypothetical protein BVRB_9g216680 [Beta vulgaris subsp. vulgaris]	XM_022011217.1	XM_022011217	159	3.12222e-75	PREDICTED: Spinacia oleracea endoglucanase-like (LOC110805597), mRNA	K15032	MTERFD	mTERF domain-containing protein, mitochondrial	http://www.genome.jp/dbget-bin/www_bget?ko:K15032	Q9SUS0	360	2.7e-32	Endoglucanase 20 OS=Arabidopsis thaliana OX=3702 GN=At4g23560 PE=2 SV=1	PF00759//PF02536//PF14659	Glycosyl hydrolase family 9//mTERF//Phage integrase, N-terminal SAM-like domain	GO:0006355//GO:0005975//GO:0015074	regulation of transcription, DNA-templated//carbohydrate metabolic process//DNA integration	GO:0004553//GO:0003677//GO:0003690	hydrolase activity, hydrolyzing O-glycosyl compounds//DNA binding//double-stranded DNA binding	--	--	--	--	DOWN	-1.7627	5.3664e-09	blast,frame:1 start:1393 end:2703
Cluster-3181.8723-2F	SNF2	SNF2	Cluster-3181.8723	1219136758	XP_021731740.1	3801	0	protein CHROMATIN REMODELING 25-like [Chenopodium quinoa]	XM_021876048.1	XM_021876048	1594	0	PREDICTED: Chenopodium quinoa protein CHROMATIN REMODELING 25-like (LOC110698589), mRNA	K10875	RAD54L, RAD54	DNA repair and recombination protein RAD54 and RAD54-like protein	http://www.genome.jp/dbget-bin/www_bget?ko:K10875	Q0PCS3	2895	0	Protein CHROMATIN REMODELING 25 OS=Arabidopsis thaliana OX=3702 GN=CHR25 PE=1 SV=1	PF11496//PF00176//PF00270//PF04851	Class II histone deacetylase complex subunits 2 and 3//SNF2 family N-terminal domain//DEAD/DEAH box helicase//Type III restriction enzyme, res subunit	GO:0016575	histone deacetylation	GO:0016787//GO:0003677//GO:0003676//GO:0005524	hydrolase activity//DNA binding//nucleic acid binding//ATP binding	GO:0070823	HDA1 complex	KOG0390	DNA repair protein, SNF2 family	DOWN	-1.2839	1.8866e-06	blast,frame:3 start:102 end:3029
Cluster-3181.873-2R	Trihelix	Trihelix	Cluster-3181.873	225446617	XP_002280689.1	592	2.4e-58	PREDICTED: trihelix transcription factor ASIL2 [Vitis vinifera]	XR_003067541.1	XR_003067541	42	9.27625e-11	PREDICTED: Cynara cardunculus var. scolymus trihelix transcription factor ASIL2-like (LOC112501652), transcript variant X3, misc_RNA	--	--	--	--	Q9SYG2	290	9.6e-25	Trihelix transcription factor ASIL1 OS=Arabidopsis thaliana OX=3702 GN=ASIL1 PE=1 SV=1	--	--	--	--	--	--	--	--	--	--	UP	1.6386	3.3991e-10	blast,frame:-3 start:1340 end:429
Cluster-3181.9039-1R	SNF2	SNF2	Cluster-3181.9039	1219142462	XP_021734592.1	2215	3.9e-246	protein CHROMATIN REMODELING 24-like [Chenopodium quinoa]	XM_010676126.2	XM_010676126	386	0	PREDICTED: Beta vulgaris subsp. vulgaris protein CHROMATIN REMODELING 24 (LOC104890586), mRNA	K20093	ERCC6L, PICH	DNA excision repair protein ERCC-6-like	http://www.genome.jp/dbget-bin/www_bget?ko:K20093	Q8W103	1905	1.3e-211	Protein CHROMATIN REMODELING 24 OS=Arabidopsis thaliana OX=3702 GN=CHR24 PE=2 SV=1	PF04851//PF00176//PF11496	Type III restriction enzyme, res subunit//SNF2 family N-terminal domain//Class II histone deacetylase complex subunits 2 and 3	GO:0016575	histone deacetylation	GO:0005524//GO:0003677//GO:0016787	ATP binding//DNA binding//hydrolase activity	GO:0070823	HDA1 complex	KOG0387	Transcription-coupled repair protein CSB/RAD26 (contains SNF2 family DNA-dependent ATPase domain)	DOWN	-4.9389	7.6783e-48	blast,frame:-2 start:3445 end:1439
Cluster-5377.0-1F	LOB	LOB	Cluster-5377.0	1226814858	XP_021856656.1	505	8.7e-49	LOB domain-containing protein 41-like [Spinacia oleracea]	XM_021870461.1	XM_021870461	164	3.92178e-79	PREDICTED: Chenopodium quinoa LOB domain-containing protein 41-like (LOC110693282), mRNA	--	--	--	--	Q9CA30	345	1.2e-31	LOB domain-containing protein 42 OS=Arabidopsis thaliana OX=3702 GN=LBD42 PE=2 SV=1	--	--	--	--	--	--	--	--	--	--	UP	4.7774	0.02971	--
Cluster-5441.0-0F	B3	B3->B3	Cluster-5441.0	1219142970	XP_021734854.1	1040	3e-110	B3 domain-containing protein REM16-like [Chenopodium quinoa]	XM_021984693.1	XM_021984693	187	2.51846e-91	PREDICTED: Spinacia oleracea B3 domain-containing protein REM16-like (LOC110780269), mRNA	--	--	--	--	Q8RYD1	214	6.8e-16	B3 domain-containing protein REM16 OS=Arabidopsis thaliana OX=3702 GN=REM16 PE=2 SV=1	PF02362	B3 DNA binding domain	--	--	GO:0003677	DNA binding	--	--	--	--	DOWN	-1.579	0.0043261	blast,frame:1 start:1 end:1233
Cluster-629.0-1R	FAR1	FAR1	Cluster-629.0	1219066361	XP_021759160.1	385	9.5e-35	protein FAR1-RELATED SEQUENCE 5-like [Chenopodium quinoa]	--	--	--	--	--	--	--	--	--	--	--	--	--	PF08731	Transcription factor AFT	GO:0036086	positive regulation of transcription from RNA polymerase II promoter in response to iron ion starvation	GO:0000981	DNA-binding transcription factor activity, RNA polymerase II-specific	--	--	--	--	UP	5.0403	0.014679	blast,frame:-2 start:575 end:54
Cluster-7652.0-0R	C2H2	C2H2	Cluster-7652.0	1219140057	XP_021733369.1	1832	4.9e-202	zinc finger protein NUTCRACKER-like isoform X1 [Chenopodium quinoa]	XM_021877677.1	XM_021877677	758	0	PREDICTED: Chenopodium quinoa zinc finger protein NUTCRACKER-like (LOC110700166), transcript variant X1, mRNA	--	--	--	--	Q9ZWA6	999	7.3e-107	Zinc finger protein MAGPIE OS=Arabidopsis thaliana OX=3702 GN=MGP PE=1 SV=1	PF04810//PF00096	Sec23/Sec24 zinc finger//Zinc finger, C2H2 type	GO:0006888//GO:0006886	endoplasmic reticulum to Golgi vesicle-mediated transport//intracellular protein transport	GO:0008270//GO:0003676	zinc ion binding//nucleic acid binding	GO:0030127	COPII vesicle coat	--	--	DOWN	-1.2549	0.00095773	blast,frame:-1 start:1679 end:126
Cluster-8062.0-2R	B3-ARF	B3->B3-ARF	Cluster-8062.0	1219097670	XP_021775111.1	2459	1.3e-274	auxin response factor 18-like [Chenopodium quinoa]	XM_021915346.1	XM_021915346	834	0	PREDICTED: Chenopodium quinoa auxin response factor 18-like (LOC110735173), transcript variant X2, mRNA	--	--	--	--	Q653H7	1560	8.7e-172	Auxin response factor 18 OS=Oryza sativa subsp. japonica OX=39947 GN=ARF18 PE=2 SV=1	PF02362//PF06507	B3 DNA binding domain//Auxin response factor	GO:0006355//GO:0009725	regulation of transcription, DNA-templated//response to hormone	GO:0003677	DNA binding	GO:0005634	nucleus	--	--	DOWN	-1.7267	1.3714e-09	blast,frame:-3 start:2159 end:261
Cluster-8423.0-0R	AP2/ERF-ERF	AP2/ERF->AP2/ERF-ERF	Cluster-8423.0	1108903932	XP_010673999.2	252	3.6e-19	PREDICTED: ethylene-responsive transcription factor ERF107 [Beta vulgaris subsp. vulgaris]	XM_021997329.1	XM_021997329	84	2.30308e-34	PREDICTED: Spinacia oleracea protein ILITYHIA (LOC110792507), mRNA	K09286	EREBP	EREBP-like factor	http://www.genome.jp/dbget-bin/www_bget?ko:K09286	Q9FKG1	163	2.9e-10	Ethylene-responsive transcription factor ERF104 OS=Arabidopsis thaliana OX=3702 GN=ERF104 PE=1 SV=1	PF02985	HEAT repeat	--	--	GO:0005515	protein binding	--	--	--	--	DOWN	-5.7446	0.00023018	blast,frame:-2 start:794 end:492|blast,frame:-1 start:690 end:379
Cluster-8597.0-2F	C2H2	C2H2	Cluster-8597.0	870854597	KMT06352.1	205	2.5e-13	hypothetical protein BVRB_7g160340 [Beta vulgaris subsp. vulgaris]	--	--	--	--	--	--	--	--	--	Q6V9I6	139	4.2e-07	Histone deacetylase HDT1 OS=Solanum chacoense OX=4108 GN=HDT1 PE=2 SV=1	PF05495//PF04777//PF04810//PF03307//PF00096//PF15750	CHY zinc finger//Erv1 / Alr family//Sec23/Sec24 zinc finger//Adenovirus 15.3kD protein in E3 region//Zinc finger, C2H2 type//Ubiquitin-binding zinc-finger	GO:0019049//GO:0055114//GO:0006886//GO:0006888	mitigation of host defenses by virus//oxidation-reduction process//intracellular protein transport//endoplasmic reticulum to Golgi vesicle-mediated transport	GO:0003676//GO:0043130//GO:0016972//GO:0008270	nucleic acid binding//ubiquitin binding//thiol oxidase activity//zinc ion binding	GO:0030127	COPII vesicle coat	--	--	DOWN	-8.3895	5.6453e-11	blast,frame:3 start:1380 end:1763
Cluster-9131.0-0F	LOB	LOB	Cluster-9131.0	1219140434	XP_021733565.1	762	3.5e-78	protein LATERAL ORGAN BOUNDARIES-like [Chenopodium quinoa]	XM_021907175.1	XM_021907175	295	1.57425e-151	PREDICTED: Chenopodium quinoa protein LATERAL ORGAN BOUNDARIES-like (LOC110727593), transcript variant X2, mRNA	--	--	--	--	Q9FML4	550	5.1e-55	Protein LATERAL ORGAN BOUNDARIES OS=Arabidopsis thaliana OX=3702 GN=LOB PE=1 SV=1	--	--	--	--	--	--	--	--	--	--	DOWN	-2.299	0.0019885	blast,frame:1 start:181 end:795
Cluster-9194.0-0F	B3	B3->B3	Cluster-9194.0	902198050	KNA13590.1	1123	7.2e-120	hypothetical protein SOVF_115280 [Spinacia oleracea]	--	--	--	--	--	--	--	--	--	Q0JP99	532	9.3e-53	B3 domain-containing protein Os01g0234100 OS=Oryza sativa subsp. japonica OX=39947 GN=Os01g0234100 PE=2 SV=1	PF02362//PF04420//PF06657	B3 DNA binding domain//CHD5-like protein//Centrosome microtubule-binding domain of Cep57	GO:0071816	tail-anchored membrane protein insertion into ER membrane	GO:0003677//GO:0008017	DNA binding//microtubule binding	GO:0045298	tubulin complex	--	--	DOWN	-1.5415	2.3021e-08	blast,frame:1 start:169 end:1440
Cluster-10425.0-1F	MYB	MYB->MYB	Cluster-10425.0	1219050928	XP_021735969.1	1083	3.3e-115	transcription factor MYB83 [Chenopodium quinoa]	XM_021883575.1	XM_021883575	357	0	PREDICTED: Chenopodium quinoa transcription factor MYB83-like (LOC110705672), mRNA	K09422	MYBP	myb proto-oncogene protein, plant	http://www.genome.jp/dbget-bin/www_bget?ko:K09422	Q9C6U1	521	1.9e-51	Transcription factor MYB83 OS=Arabidopsis thaliana OX=3702 GN=MYB83 PE=2 SV=1	--	--	--	--	--	--	--	--	--	--	UP	1.0405	0.042934	blast,frame:2 start:50 end:1312
Cluster-10718.0-2R	CPP	CPP	Cluster-10718.0	902179797	KNA09413.1	2142	7.3e-238	hypothetical protein SOVF_153770 [Spinacia oleracea]	XM_021885796.1	XM_021885796	951	0	PREDICTED: Chenopodium quinoa protein tesmin/TSO1-like CXC 5 (LOC110707753), mRNA	--	--	--	--	Q9SZD1	1277	5.6e-139	Protein tesmin/TSO1-like CXC 5 OS=Arabidopsis thaliana OX=3702 GN=TCX5 PE=1 SV=1	--	--	--	--	--	--	--	--	KOG1171	Metallothionein-like protein	UP	1.3725	1.0633e-11	blast,frame:-3 start:2173 end:383
Cluster-10870.0-0F	NAC	NAC	Cluster-10870.0	1045808166	ANV19798.1	753	3.8e-77	NAC6 [Haloxylon ammodendron]	KU534098.1	KU534098	408	0	Haloxylon ammodendron NAC6 mRNA, complete cds	--	--	--	--	Q9FY93	314	1.2e-27	NAC domain-containing protein 83 OS=Arabidopsis thaliana OX=3702 GN=NAC083 PE=1 SV=1	PF02365	No apical meristem (NAM) protein	GO:0006355	regulation of transcription, DNA-templated	GO:0003677	DNA binding	--	--	--	--	UP	2.0181	9.5523e-07	blast,frame:1 start:154 end:624
Cluster-10915.0-0F	OFP	OFP	Cluster-10915.0	870843486	KMS96648.1	1148	9.7e-123	hypothetical protein BVRB_8g201110 [Beta vulgaris subsp. vulgaris]	XM_021916660.1	XM_021916660	411	0	PREDICTED: Chenopodium quinoa transcription repressor OFP5-like (LOC110736439), mRNA	--	--	--	--	Q8VZN1	310	5.5e-27	Transcription repressor OFP5 OS=Arabidopsis thaliana OX=3702 GN=OFP5 PE=1 SV=1	--	--	--	--	--	--	--	--	--	--	DOWN	-1.903	9.5041e-08	blast,frame:1 start:313 end:1527
Cluster-11236.0-1R	C2H2	C2H2	Cluster-11236.0	1219059243	XP_021755393.1	373	2.8e-33	zinc finger protein 2-like [Chenopodium quinoa]	XM_021899701.1	XM_021899701	82	2.48831e-33	PREDICTED: Chenopodium quinoa zinc finger protein 2-like (LOC110720646), mRNA	--	--	--	--	Q39261	195	4.7e-14	Zinc finger protein 2 OS=Arabidopsis thaliana OX=3702 GN=ZFP2 PE=1 SV=1	PF00096	Zinc finger, C2H2 type	--	--	GO:0003676	nucleic acid binding	--	--	--	--	UP	3.2227	4.8549e-07	blast,frame:-2 start:696 end:118
Cluster-12160.0-2F	MYB-related	MYB->MYB-related	Cluster-12160.0	1219103588	XP_021715026.1	759	7.2e-78	transcription repressor MYB6-like [Chenopodium quinoa]	XM_019247368.1	XM_019247368	193	7.29547e-95	PREDICTED: Beta vulgaris subsp. vulgaris transcription factor MYB23 (LOC104883425), mRNA	K09422	MYBP	myb proto-oncogene protein, plant	http://www.genome.jp/dbget-bin/www_bget?ko:K09422	A0A4D6Q4S0	412	4.7e-39	Transcription factor MYB1 OS=Crocosmia x crocosmiiflora OX=1053288 GN=MYB2 PE=2 SV=1	--	--	--	--	--	--	--	--	--	--	UP	2.2649	0.023867	blast,frame:3 start:3 end:779
Cluster-12746.0-1R	B3	B3->B3	Cluster-12746.0	1219102118	XP_021714289.1	1201	7.3e-129	B3 domain-containing protein Os01g0234100-like [Chenopodium quinoa]	XM_021896184.1	XM_021896184	160	2.97643e-76	PREDICTED: Chenopodium quinoa B3 domain-containing protein Os01g0234100-like (LOC110717470), mRNA	--	--	--	--	Q0JP99	580	2.8e-58	B3 domain-containing protein Os01g0234100 OS=Oryza sativa subsp. japonica OX=39947 GN=Os01g0234100 PE=2 SV=1	PF05837	Centromere protein H (CENP-H)	GO:0051382	kinetochore assembly	--	--	GO:0000776	kinetochore	--	--	DOWN	-2.6206	1.8689e-10	blast,frame:-2 start:1631 end:381
Cluster-15145.0-0R	GNAT	GNAT	Cluster-15145.0	1219077659	XP_021764910.1	755	2e-77	uncharacterized protein LOC110729486 [Chenopodium quinoa]	XM_021909217.1	XM_021909217	176	1.96134e-85	PREDICTED: Chenopodium quinoa uncharacterized N-acetyltransferase p20-like (LOC110729485), mRNA	--	--	--	--	P05332	185	9.5e-13	Uncharacterized N-acetyltransferase p20 OS=Bacillus licheniformis OX=1402 GN=p20 PE=4 SV=1	PF00583//PF03234//PF13302	Acetyltransferase (GNAT) family//Cdc37 N terminal kinase binding//Acetyltransferase (GNAT) domain	GO:0042967	obsolete acyl-carrier-protein biosynthetic process	GO:0019901//GO:0008080	protein kinase binding//N-acetyltransferase activity	--	--	--	--	UP	1.1262	0.037454	blast,frame:-1 start:889 end:293
Cluster-15445.0-1F	AP2/ERF-ERF	AP2/ERF->AP2/ERF-ERF	Cluster-15445.0	1219103922	XP_021715190.1	673	7.6e-68	ethylene-responsive transcription factor TINY-like [Chenopodium quinoa]	XM_021859498.1	XM_021859498	51	7.08429e-16	PREDICTED: Chenopodium quinoa ethylene-responsive transcription factor TINY-like (LOC110683154), mRNA	K09286	EREBP	EREBP-like factor	http://www.genome.jp/dbget-bin/www_bget?ko:K09286	Q9LYD3	439	3.9e-42	Dehydration-responsive element-binding protein 3 OS=Arabidopsis thaliana OX=3702 GN=DREB3 PE=2 SV=1	PF08040//PF00847	MNLL subunit//AP2 domain	GO:0006118//GO:0006355	obsolete electron transport//regulation of transcription, DNA-templated	GO:0003700//GO:0003954	DNA-binding transcription factor activity//NADH dehydrogenase activity	GO:0005667//GO:0005739	transcription regulator complex//mitochondrion	--	--	DOWN	-2.4113	0.0087445	blast,frame:2 start:170 end:1102
Cluster-3181.10315-1R	FAR1	FAR1	Cluster-3181.10315	1219088970	XP_021770665.1	1325	3.4e-143	protein FAR1-RELATED SEQUENCE 6-like [Chenopodium quinoa]	--	--	--	--	--	--	--	--	--	Q9SWG3	600	1.5e-60	Protein FAR-RED IMPAIRED RESPONSE 1 OS=Arabidopsis thaliana OX=3702 GN=FAR1 PE=1 SV=1	PF08064	UME (NUC010) domain	GO:0016310//GO:0009069	phosphorylation//serine family amino acid metabolic process	GO:0004674	protein serine/threonine kinase activity	--	--	--	--	DOWN	-1.9316	0.0079208	blast,frame:-3 start:399 end:1
Cluster-3181.10998-1F	C2H2	C2H2	Cluster-3181.10998	731366697	XP_010695210.1	395	3.5e-35	PREDICTED: mitochondrial substrate carrier family protein E [Beta vulgaris subsp. vulgaris]	XM_010696908.2	XM_010696908	177	1.76995e-85	PREDICTED: Beta vulgaris subsp. vulgaris mitochondrial substrate carrier family protein E (LOC104907886), mRNA	--	--	--	--	Q2UU67	130	7.2e-06	Mitochondrial glycine transporter OS=Aspergillus oryzae (strain ATCC 42149 / RIB 40) OX=510516 GN=AO090009000436 PE=3 SV=1	PF13456	Reverse transcriptase-like	GO:0051252	regulation of RNA metabolic process	GO:0003676//GO:0004523	nucleic acid binding//RNA-DNA hybrid ribonuclease activity	--	--	--	--	DOWN	-1.0213	2.5257e-06	blast,frame:3 start:3 end:443
Cluster-3181.11028-1R	GARP-G2-like	GARP->GARP-G2-like	Cluster-3181.11028	1524799303	RQP01792.1	731	2.8e-74	hypothetical protein POPTR_017G015800 [Populus trichocarpa]	XM_021887452.1	XM_021887452	320	4.12188e-165	PREDICTED: Chenopodium quinoa transcription activator GLK1-like (LOC110709239), mRNA	--	--	--	--	Q5Z5I4	459	3.7e-44	Probable transcription factor GLK1 OS=Oryza sativa subsp. japonica OX=39947 GN=GLK1 PE=2 SV=1	PF09726//PF01586//PF01080	Macoilin family//Myogenic Basic domain//Presenilin	GO:0007517//GO:0023041//GO:0016485//GO:0006355	muscle organ development//neuronal signal transduction//protein processing//regulation of transcription, DNA-templated	GO:0004190//GO:0003677	aspartic-type endopeptidase activity//DNA binding	GO:0005634//GO:0016021//GO:0030867	nucleus//integral component of membrane//rough endoplasmic reticulum membrane	--	--	DOWN	-1.5537	1.0849e-48	blast,frame:-2 start:1856 end:669
Cluster-3181.12518-0R	AP2/ERF-ERF	AP2/ERF->AP2/ERF-ERF	Cluster-3181.12518	1219097895	XP_021775223.1	553	8.7e-54	ethylene-responsive transcription factor ERF071-like [Chenopodium quinoa]	XM_021919531.1	XM_021919531	140	3.35797e-65	PREDICTED: Chenopodium quinoa ethylene-responsive transcription factor ERF071-like (LOC110739078), mRNA	K09286	EREBP	EREBP-like factor	http://www.genome.jp/dbget-bin/www_bget?ko:K09286	Q6K7E6	234	3.2e-18	Ethylene-responsive transcription factor 1 OS=Oryza sativa subsp. japonica OX=39947 GN=EREBP1 PE=1 SV=1	PF05023	Phytochelatin synthase	GO:0010038//GO:0046938	response to metal ion//phytochelatin biosynthetic process	GO:0046872//GO:0016756	metal ion binding//glutathione gamma-glutamylcysteinyltransferase activity	--	--	--	--	UP	4.5019	0	--
Cluster-3181.13056-0F	bHLH	bHLH	Cluster-3181.13056	1219118507	XP_021722527.1	789	3.6e-81	transcription factor bHLH61-like [Chenopodium quinoa]	XM_021866835.1	XM_021866835	340	2.11741e-176	PREDICTED: Chenopodium quinoa transcription factor bHLH61-like (LOC110690011), mRNA	--	--	--	--	Q9LSL1	611	6e-62	Transcription factor bHLH93 OS=Arabidopsis thaliana OX=3702 GN=BHLH93 PE=1 SV=1	PF00010	Helix-loop-helix DNA-binding domain	--	--	GO:0046983	protein dimerization activity	--	--	--	--	DOWN	-3.9635	3.3005e-56	blast,frame:1 start:1 end:1212
Cluster-3181.13129-0F	C3H	C3H	Cluster-3181.13129	1219072117	XP_021762042.1	412	5e-38	zinc finger CCCH domain-containing protein 43-like [Chenopodium quinoa]	XM_021999522.1	XM_021999522	115	6.32408e-52	PREDICTED: Spinacia oleracea zinc finger CCCH domain-containing protein 43 (LOC110794543), mRNA	--	--	--	--	Q5RJC5	234	8.2e-19	Zinc finger CCCH domain-containing protein 67 OS=Arabidopsis thaliana OX=3702 GN=At5g63260 PE=2 SV=2	PF01080//PF00642//PF10486//PF02724	Presenilin//Zinc finger C-x8-C-x5-C-x3-H type (and similar)//Phosphoinositide 3-kinase gamma adapter protein p101 subunit//CDC45-like protein	GO:0016485//GO:0006270	protein processing//DNA replication initiation	GO:0046935//GO:0046872//GO:0004190	1-phosphatidylinositol-3-kinase regulator activity//metal ion binding//aspartic-type endopeptidase activity	GO:0016021//GO:0005944	integral component of membrane//phosphatidylinositol 3-kinase complex, class IB	--	--	UP	1.2251	0.00057907	--
Cluster-3181.13480-2R	FAR1	FAR1	Cluster-3181.13480	1108910924	XP_010675037.2	2963	0	PREDICTED: protein FAR1-RELATED SEQUENCE 5-like isoform X1 [Beta vulgaris subsp. vulgaris]	XM_021862627.1	XM_021862627	103	2.12678e-44	PREDICTED: Chenopodium quinoa ubiquitin carboxyl-terminal hydrolase 6-like (LOC110686054), mRNA	--	--	--	--	Q9SZL8	846	6e-89	Protein FAR1-RELATED SEQUENCE 5 OS=Arabidopsis thaliana OX=3702 GN=FRS5 PE=1 SV=1	PF00872	Transposase, Mutator family	GO:0006313	transposition, DNA-mediated	GO:0004803//GO:0003677	transposase activity//DNA binding	--	--	--	--	DOWN	-1.3417	4.2748e-06	blast,frame:-3 start:2180 end:3
Cluster-3181.1355-0R	MYB	MYB->MYB	Cluster-3181.1355	1226832463	XP_021865407.1	864	7.8e-90	transcription factor MYB15-like [Spinacia oleracea]	XM_010697220.2	XM_010697220	202	1.18097e-99	PREDICTED: Beta vulgaris subsp. vulgaris myb-like protein Q (LOC104908139), mRNA	K09422	MYBP	myb proto-oncogene protein, plant	http://www.genome.jp/dbget-bin/www_bget?ko:K09422	Q5NBM8	512	1.9e-50	Transcription factor CSA OS=Oryza sativa subsp. japonica OX=39947 GN=CSA PE=2 SV=2	--	--	--	--	--	--	--	--	--	--	UP	1.5364	0.00018269	blast,frame:-1 start:1519 end:347
Cluster-3181.15863-0R	bHLH	bHLH	Cluster-3181.15863	1219079038	XP_021765639.1	548	7.5e-53	transcription factor bHLH71-like [Chenopodium quinoa]	XM_021909947.1	XM_021909947	309	8.67959e-159	PREDICTED: Chenopodium quinoa transcription factor bHLH71-like (LOC110730169), mRNA	--	--	--	--	Q9SK91	333	2.4e-29	Transcription factor bHLH94 OS=Arabidopsis thaliana OX=3702 GN=BHLH94 PE=1 SV=2	PF00010	Helix-loop-helix DNA-binding domain	--	--	GO:0046983	protein dimerization activity	--	--	--	--	UP	2.6956	5.5354e-42	blast,frame:-2 start:1393 end:1097|blast,frame:-1 start:1238 end:669
Cluster-3181.16233-2R	bHLH	bHLH	Cluster-3181.16233	731359836	XP_010691492.1	1000	2.1e-105	PREDICTED: transcription factor bHLH25 [Beta vulgaris subsp. vulgaris]	XM_021992619.1	XM_021992619	191	2.41973e-93	PREDICTED: Spinacia oleracea transcription factor bHLH18-like (LOC110787985), mRNA	--	--	--	--	Q9T072	427	2.2e-40	Transcription factor bHLH25 OS=Arabidopsis thaliana OX=3702 GN=BHLH25 PE=2 SV=2	PF00010//PF00736//PF00992	Helix-loop-helix DNA-binding domain//EF-1 guanine nucleotide exchange domain//Troponin	GO:0006448//GO:0006414	regulation of translational elongation//translational elongation	GO:0003746//GO:0046983	translation elongation factor activity//protein dimerization activity	GO:0005861//GO:0005840	troponin complex//ribosome	--	--	DOWN	-4.8386	7.0501e-47	blast,frame:-2 start:1053 end:952|blast,frame:-3 start:2369 end:1326
Cluster-3181.170-0R	bHLH	bHLH	Cluster-3181.170	731312619	XP_010675612.1	1024	2.3e-108	PREDICTED: transcription factor bHLH94 [Beta vulgaris subsp. vulgaris]	XM_010677310.2	XM_010677310	351	0	PREDICTED: Beta vulgaris subsp. vulgaris transcription factor bHLH94 (LOC104891599), mRNA	--	--	--	--	Q9SK91	635	1.1e-64	Transcription factor bHLH94 OS=Arabidopsis thaliana OX=3702 GN=BHLH94 PE=1 SV=2	PF00957//PF00010//PF00424	Synaptobrevin//Helix-loop-helix DNA-binding domain//REV protein (anti-repression trans-activator protein)	GO:0016192//GO:0006355	vesicle-mediated transport//regulation of transcription, DNA-templated	GO:0046983//GO:0003700	protein dimerization activity//DNA-binding transcription factor activity	GO:0005667//GO:0016021//GO:0042025	transcription regulator complex//integral component of membrane//host cell nucleus	--	--	UP	1.0569	0.0029066	blast,frame:-1 start:1379 end:180
Cluster-3181.17187-1R	GARP-G2-like	GARP->GARP-G2-like	Cluster-3181.17187	--	--	--	--	--	XM_021912435.1	XM_021912435	70	7.71108e-27	PREDICTED: Chenopodium quinoa two-component response regulator-like APRR2 (LOC110732487), transcript variant X3, mRNA	--	--	--	--	--	--	--	--	PF03936	Terpene synthase family, metal binding domain	--	--	GO:0016829//GO:0000287//GO:0010333	lyase activity//magnesium ion binding//terpene synthase activity	--	--	--	--	DOWN	-2.1843	3.0177e-05	--
Cluster-3181.17501-1F	AP2/ERF-ERF	AP2/ERF->AP2/ERF-ERF	Cluster-3181.17501	870868069	KMT18938.1	534	1.3e-51	hypothetical protein BVRB_2g030370 [Beta vulgaris subsp. vulgaris]	XM_010698014.2	XM_010698014	204	7.99105e-101	PREDICTED: Beta vulgaris subsp. vulgaris ethylene-responsive transcription factor WIN1 (LOC104908848), mRNA	--	--	--	--	Q9XI33	353	4.6e-32	Ethylene-responsive transcription factor WIN1 OS=Arabidopsis thaliana OX=3702 GN=WIN1 PE=2 SV=1	--	--	--	--	--	--	--	--	--	--	DOWN	-2.175	4.2757e-17	blast,frame:2 start:596 end:1213
Cluster-3181.18871-1R	C2H2	C2H2	Cluster-3181.18871	--	--	--	--	--	--	--	--	--	--	--	--	--	--	--	--	--	--	--	--	--	--	--	--	--	--	--	--	UP	2.5448	2.9839e-06	--
Cluster-3181.2013-1R	SET	SET	Cluster-3181.2013	1226838016	XP_021867261.1	3707	0	histone-lysine N-methyltransferase ATXR7 [Spinacia oleracea]	XM_019251932.1	XM_019251932	531	0	PREDICTED: Beta vulgaris subsp. vulgaris hypothetical protein (LOC104903815), transcript variant X9, mRNA	--	--	--	--	F4K1J4	857	4.9e-90	Histone-lysine N-methyltransferase ATXR7 OS=Arabidopsis thaliana OX=3702 GN=ATXR7 PE=2 SV=1	PF00856//PF00210//PF02213	SET domain//Ferritin-like domain//GYF domain	GO:0006879	cellular iron ion homeostasis	GO:0005515//GO:0008199	protein binding//ferric iron binding	--	--	KOG1080	Histone H3 (Lys4) methyltransferase complex, subunit SET1 and related methyltransferases	UP	1.3226	1.1061e-20	--
Cluster-3181.20909-1F	mTERF	mTERF	Cluster-3181.20909	870848156	KMT00445.1	2372	1.6e-264	hypothetical protein BVRB_9g217470 [Beta vulgaris subsp. vulgaris]	XM_010692582.2	XM_010692582	985	0	PREDICTED: Beta vulgaris subsp. vulgaris transcription termination factor MTERF2, chloroplastic (LOC104904356), mRNA	K15032	MTERFD	mTERF domain-containing protein, mitochondrial	http://www.genome.jp/dbget-bin/www_bget?ko:K15032	F4IHL3	1718	4.1e-190	Transcription termination factor MTERF2, chloroplastic OS=Arabidopsis thaliana OX=3702 GN=MTERF2 PE=3 SV=1	PF10414//PF02536	Sirohaem synthase dimerisation region//mTERF	GO:0006355//GO:0006779//GO:0055114	regulation of transcription, DNA-templated//porphyrin-containing compound biosynthetic process//oxidation-reduction process	GO:0003690	double-stranded DNA binding	--	--	--	--	DOWN	-1.1652	1.9251e-12	blast,frame:2 start:32 end:2068
Cluster-3181.21870-0R	WRKY	WRKY	Cluster-3181.21870	870858801	KMT10289.1	1348	9e-146	hypothetical protein BVRB_5g120440 [Beta vulgaris subsp. vulgaris]	XM_010680880.2	XM_010680880	673	0	PREDICTED: Beta vulgaris subsp. vulgaris probable WRKY transcription factor 21 (LOC104894604), mRNA	--	--	--	--	O04336	741	8.4e-77	Probable WRKY transcription factor 21 OS=Arabidopsis thaliana OX=3702 GN=WRKY21 PE=2 SV=1	PF03106//PF06495	WRKY DNA -binding domain//Fruit fly transformer protein	GO:0006397//GO:0046660//GO:0006355	mRNA processing//female sex differentiation//regulation of transcription, DNA-templated	GO:0043565//GO:0003700	sequence-specific DNA binding//DNA-binding transcription factor activity	GO:0042025//GO:0005667	host cell nucleus//transcription regulator complex	--	--	DOWN	-1.2953	5.1049e-27	blast,frame:-1 start:1820 end:699
Cluster-3181.21886-1R	NAC	NAC	Cluster-3181.21886	1226798391	XP_021848488.1	469	8.3e-44	NAC domain-containing protein 35 [Spinacia oleracea]	XM_021920612.1	XM_021920612	201	7.1875e-99	PREDICTED: Chenopodium quinoa NAC domain-containing protein 35-like (LOC110740113), mRNA	--	--	--	--	Q10S65	404	1.1e-37	NAC domain-containing protein 22 OS=Oryza sativa subsp. japonica OX=39947 GN=NAC022 PE=2 SV=1	PF00895//PF02365	ATP synthase protein 8//No apical meristem (NAM) protein	GO:0006355//GO:0015986	regulation of transcription, DNA-templated//ATP synthesis coupled proton transport	GO:0003677//GO:0015078	DNA binding//proton transmembrane transporter activity	GO:0000276	mitochondrial proton-transporting ATP synthase complex, coupling factor F(o)	--	--	DOWN	-2.7952	7.0816e-199	blast,frame:-3 start:1046 end:576|blast,frame:-2 start:2259 end:1882
Cluster-3181.23195-1R	HB-HD-ZIP	HB->HB-HD-ZIP	Cluster-3181.23195	1219043002	XP_021758602.1	726	1.5e-73	homeobox-leucine zipper protein ATHB-16-like isoform X1 [Chenopodium quinoa]	XM_021902910.1	XM_021902910	284	6.04318e-145	PREDICTED: Chenopodium quinoa homeobox-leucine zipper protein ATHB-16-like (LOC110723559), transcript variant X1, mRNA	K09338	HD-ZIP	homeobox-leucine zipper protein	http://www.genome.jp/dbget-bin/www_bget?ko:K09338	P46668	523	2e-51	Homeobox-leucine zipper protein ATHB-6 OS=Arabidopsis thaliana OX=3702 GN=ATHB-6 PE=1 SV=1	PF02183//PF05920//PF00046	Homeobox associated leucine zipper//Homeobox KN domain//Homeodomain	GO:0006355	regulation of transcription, DNA-templated	GO:0003677//GO:0043565	DNA binding//sequence-specific DNA binding	--	--	--	--	UP	1.2341	4.1807e-77	blast,frame:-1 start:1667 end:987|blast,frame:-2 start:2272 end:1766
Cluster-3181.23440-1R	GNAT	GNAT	Cluster-3181.23440	902239911	KNA25793.1	2410	1e-268	hypothetical protein SOVF_003660 [Spinacia oleracea]	XM_010669546.2	XM_010669546	1039	0	PREDICTED: Beta vulgaris subsp. vulgaris protein root UVB sensitive 1, chloroplastic (LOC104884845), mRNA	--	--	--	--	Q7X6P3	1614	7.6e-178	Protein root UVB sensitive 1, chloroplastic OS=Arabidopsis thaliana OX=3702 GN=RUS1 PE=1 SV=1	PF08445//PF13508//PF13673//PF00583	FR47-like protein//Acetyltransferase (GNAT) domain//Acetyltransferase (GNAT) domain//Acetyltransferase (GNAT) family	GO:0042967	obsolete acyl-carrier-protein biosynthetic process	GO:0016747//GO:0008080	transferase activity, transferring acyl groups other than amino-acyl groups//N-acetyltransferase activity	--	--	KOG4249	Uncharacterized conserved protein	DOWN	-1.3516	9.8081e-39	blast,frame:3 start:231 end:2210
Cluster-3181.23728-2R	GRAS	GRAS	Cluster-3181.23728	902224303	KNA19752.1	2396	3.4e-267	hypothetical protein SOVF_058490 [Spinacia oleracea]	XM_022005084.1	XM_022005084	756	0	PREDICTED: Spinacia oleracea protein SCARECROW 1 (LOC110799814), mRNA	--	--	--	--	Q9AVK4	1636	1.7e-180	Protein SCARECROW OS=Pisum sativum OX=3888 GN=SCR PE=2 SV=1	--	--	--	--	--	--	--	--	--	--	DOWN	-1.8197	3.6692e-45	blast,frame:-3 start:3164 end:549
Cluster-3181.24349-2F	AP2/ERF-ERF	AP2/ERF->AP2/ERF-ERF	Cluster-3181.24349	1226854234	XP_021840409.1	557	4.9e-54	ethylene-responsive transcription factor 4-like [Spinacia oleracea]	XM_028390212.1	XM_028390212	37	9.97425e-08	PREDICTED: Glycine soja ethylene-responsive transcription factor 3-like (LOC114423450), mRNA	K09286	EREBP	EREBP-like factor	http://www.genome.jp/dbget-bin/www_bget?ko:K09286	Q9LW49	241	8.1e-19	Ethylene-responsive transcription factor 4 OS=Nicotiana sylvestris OX=4096 GN=ERF4 PE=2 SV=1	PF00847//PF02776	AP2 domain//Thiamine pyrophosphate enzyme, N-terminal TPP binding domain	GO:0006355	regulation of transcription, DNA-templated	GO:0003700//GO:0030976	DNA-binding transcription factor activity//thiamine pyrophosphate binding	GO:0005667	transcription regulator complex	--	--	DOWN	-1.8195	6.5736e-260	blast,frame:3 start:159 end:1181
Cluster-3181.24809-2R	C2H2	C2H2	Cluster-3181.24809	731338845	XP_010680535.1	915	7.9e-96	PREDICTED: protein SENSITIVE TO PROTON RHIZOTOXICITY 1 [Beta vulgaris subsp. vulgaris]	XM_022005376.1	XM_022005376	78	8.44052e-31	PREDICTED: Spinacia oleracea protein SENSITIVE TO PROTON RHIZOTOXICITY 2-like (LOC110800087), mRNA	--	--	--	--	Q943I6	498	6.8e-49	Zinc finger protein STOP1 homolog OS=Oryza sativa subsp. japonica OX=39947 GN=Os01g0871200 PE=2 SV=1	PF00096	Zinc finger, C2H2 type	--	--	GO:0003676	nucleic acid binding	--	--	--	--	DOWN	-1.3073	3.735e-33	blast,frame:-3 start:1320 end:325
Cluster-3181.24953-1R	RWP-RK	RWP-RK	Cluster-3181.24953	1219063608	XP_021757709.1	2848	0	protein NLP6-like [Chenopodium quinoa]	XM_021912175.1	XM_021912175	1383	0	PREDICTED: Chenopodium quinoa protein NLP6-like (LOC110732260), mRNA	--	--	--	--	Q84TH9	1488	2.6e-163	Protein NLP7 OS=Arabidopsis thaliana OX=3702 GN=NLP7 PE=1 SV=2	PF18024//PF00564	Helix-turn-helix domain//PB1 domain	--	--	GO:0003677//GO:0005515	DNA binding//protein binding	--	--	--	--	DOWN	-1.0286	1.4461e-28	blast,frame:-2 start:2359 end:332
Cluster-3181.25138-1F	AP2/ERF-ERF	AP2/ERF->AP2/ERF-ERF	Cluster-3181.25138	1219095757	XP_021774112.1	689	1.4e-69	ethylene-responsive transcription factor ERF017-like [Chenopodium quinoa]	XM_021874548.1	XM_021874548	116	7.10156e-52	PREDICTED: Chenopodium quinoa ethylene-responsive transcription factor ERF017-like (LOC110697201), mRNA	--	--	--	--	Q84QC2	394	8.7e-37	Ethylene-responsive transcription factor ERF017 OS=Arabidopsis thaliana OX=3702 GN=ERF017 PE=2 SV=1	PF00847	AP2 domain	GO:0006355	regulation of transcription, DNA-templated	GO:0003700	DNA-binding transcription factor activity	GO:0005667	transcription regulator complex	--	--	DOWN	-2.7992	1.311e-164	blast,frame:2 start:2 end:838
Cluster-3181.25336-0F	LOB	LOB	Cluster-3181.25336	1226849439	XP_021838468.1	409	1.2e-36	LOB domain-containing protein 40-like [Spinacia oleracea]	XM_021982776.1	XM_021982776	223	6.66056e-111	PREDICTED: Spinacia oleracea LOB domain-containing protein 40-like (LOC110778211), mRNA	--	--	--	--	Q9M886	336	1.3e-29	LOB domain-containing protein 41 OS=Arabidopsis thaliana OX=3702 GN=LBD41 PE=2 SV=1	PF11112	Pyocin activator protein PrtN	GO:0006355	regulation of transcription, DNA-templated	--	--	--	--	--	--	UP	2.2582	3.2034e-264	blast,frame:3 start:2226 end:2849|blast,frame:1 start:520 end:753
Cluster-3181.25336-2F	LOB	LOB	Cluster-3181.25336	1226849439	XP_021838468.1	409	1.2e-36	LOB domain-containing protein 40-like [Spinacia oleracea]	XM_021982776.1	XM_021982776	223	6.66056e-111	PREDICTED: Spinacia oleracea LOB domain-containing protein 40-like (LOC110778211), mRNA	--	--	--	--	Q9M886	336	1.3e-29	LOB domain-containing protein 41 OS=Arabidopsis thaliana OX=3702 GN=LBD41 PE=2 SV=1	PF11112	Pyocin activator protein PrtN	GO:0006355	regulation of transcription, DNA-templated	--	--	--	--	--	--	UP	2.2582	3.2034e-264	blast,frame:3 start:2226 end:2849|blast,frame:1 start:520 end:753
Cluster-3181.25471-2F	C2H2	C2H2	Cluster-3181.25471	1219088181	XP_021770291.1	887	5.2e-92	protein indeterminate-domain 12-like [Chenopodium quinoa]	XM_021914599.1	XM_021914599	454	0	PREDICTED: Chenopodium quinoa protein indeterminate-domain 12-like (LOC110734444), mRNA	--	--	--	--	Q8H1F5	747	3.4e-77	Protein indeterminate-domain 7 OS=Arabidopsis thaliana OX=3702 GN=IDD7 PE=2 SV=1	PF05399//PF07975//PF00096//PF04810//PF08515	Ectropic viral integration site 2A protein (EVI2A)//TFIIH C1-like domain//Zinc finger, C2H2 type//Sec23/Sec24 zinc finger//Transforming growth factor beta type I GS-motif	GO:0009069//GO:0016310//GO:0006281//GO:0006886//GO:0006888//GO:0007178//GO:0006468	serine family amino acid metabolic process//phosphorylation//DNA repair//intracellular protein transport//endoplasmic reticulum to Golgi vesicle-mediated transport//transmembrane receptor protein serine/threonine kinase signaling pathway//protein phosphorylation	GO:0003676//GO:0005524//GO:0008270//GO:0004675	nucleic acid binding//ATP binding//zinc ion binding//transmembrane receptor protein serine/threonine kinase activity	GO:0030127//GO:0016020//GO:0016021	COPII vesicle coat//membrane//integral component of membrane	--	--	DOWN	-2.535	7.0985e-86	blast,frame:3 start:297 end:920|blast,frame:2 start:3674 end:4654
Cluster-3181.25760-2R	AUX/IAA	AUX/IAA	Cluster-3181.25760	902186854	KNA10794.1	396	1.1e-35	hypothetical protein SOVF_141030 [Spinacia oleracea]	XM_021904595.1	XM_021904595	258	6.42329e-131	PREDICTED: Chenopodium quinoa auxin response factor 18-like (LOC110725127), mRNA	K14486	K14486, ARF	auxin response factor	http://www.genome.jp/dbget-bin/www_bget?ko:K14486	Q9ZPY6	275	4.3e-23	Auxin response factor 11 OS=Arabidopsis thaliana OX=3702 GN=ARF11 PE=2 SV=3	--	--	--	--	--	--	--	--	--	--	DOWN	-1.8534	8.8113e-18	--
Cluster-3181.25922-0R	C2H2	C2H2	Cluster-3181.25922	731348219	XP_010685384.1	878	3.9e-91	PREDICTED: protein indeterminate-domain 7 [Beta vulgaris subsp. vulgaris]	XM_021860765.1	XM_021860765	362	0	PREDICTED: Chenopodium quinoa protein indeterminate-domain 7 (LOC110684323), mRNA	--	--	--	--	Q9LRW7	767	1.1e-79	Protein indeterminate-domain 11 OS=Arabidopsis thaliana OX=3702 GN=IDD11 PE=2 SV=1	PF02892//PF07975//PF00096//PF04810	BED zinc finger//TFIIH C1-like domain//Zinc finger, C2H2 type//Sec23/Sec24 zinc finger	GO:0006281//GO:0006886//GO:0006888	DNA repair//intracellular protein transport//endoplasmic reticulum to Golgi vesicle-mediated transport	GO:0003676//GO:0003677//GO:0008270	nucleic acid binding//DNA binding//zinc ion binding	GO:0030127	COPII vesicle coat	--	--	DOWN	-1.777	1.8009e-84	blast,frame:-1 start:2803 end:2030
Cluster-3181.26141-0F	bHLH	bHLH	Cluster-3181.26141	1219166881	XP_021747072.1	342	6.2e-29	transcription factor bHLH35-like [Chenopodium quinoa]	--	--	--	--	--	--	--	--	--	Q700E3	241	1.2e-18	Transcription factor bHLH27 OS=Arabidopsis thaliana OX=3702 GN=BHLH27 PE=2 SV=1	PF00010//PF04710//PF15957	Helix-loop-helix DNA-binding domain//Pellino//Commissureless	GO:0007411//GO:0008592//GO:0000209	axon guidance//regulation of Toll signaling pathway//protein polyubiquitination	GO:0061630//GO:0046983	ubiquitin protein ligase activity//protein dimerization activity	--	--	--	--	DOWN	-1.1022	1.7085e-41	blast,frame:3 start:1005 end:1313|blast,frame:1 start:97 end:720
Cluster-3181.27643-1F	WRKY	WRKY	Cluster-3181.27643	--	--	--	--	--	JN119301.1	JN119301	115	3.34452e-51	Beta vulgaris clone BVAB-SB5 hypothetical protein gene, partial cds; and hypothetical protein, aminoacyl-tRNA synthetase, hypothetical proteins, zinc finger protein, and hypothetical proteins genes, complete cds	--	--	--	--	--	--	--	--	--	--	--	--	--	--	--	--	--	--	DOWN	-1.207	0.0016263	--
Cluster-3181.32211-0F	MADS-MIKC	MADS->MADS-MIKC	Cluster-3181.32211	731316238	XP_010694750.1	999	1.5e-105	PREDICTED: agamous-like MADS-box protein AGL15 isoform X1 [Beta vulgaris subsp. vulgaris]	XM_010696448.2	XM_010696448	527	0	PREDICTED: Beta vulgaris subsp. vulgaris agamous-like MADS-box protein AGL15 (LOC104907505), transcript variant X1, mRNA	--	--	--	--	Q39295	561	3.6e-56	Agamous-like MADS-box protein AGL15 OS=Brassica napus OX=3708 GN=AGL15 PE=3 SV=1	PF01486//PF00319//PF08990	K-box region//SRF-type transcription factor (DNA-binding and dimerisation domain)//Erythronolide synthase docking domain	GO:0006355	regulation of transcription, DNA-templated	GO:0048037//GO:0016740//GO:0003700//GO:0046983//GO:0003677	obsolete cofactor binding//transferase activity//DNA-binding transcription factor activity//protein dimerization activity//DNA binding	GO:0005634//GO:0005667	nucleus//transcription regulator complex	--	--	UP	1.9991	3.7602e-13	blast,frame:1 start:319 end:1080
Cluster-3181.32531-1R	AP2/ERF-ERF	AP2/ERF->AP2/ERF-ERF	Cluster-3181.32531	1219085344	XP_021768844.1	739	1.9e-75	ethylene-responsive transcription factor 1B-like [Chenopodium quinoa]	XM_021913152.1	XM_021913152	296	5.22375e-152	PREDICTED: Chenopodium quinoa ethylene-responsive transcription factor 1B-like (LOC110733129), mRNA	K14516	ERF1	ethylene-responsive transcription factor 1	http://www.genome.jp/dbget-bin/www_bget?ko:K14516	A0A3Q7I5Y9	354	3.2e-32	Ethylene-response factor C3 OS=Solanum lycopersicum OX=4081 GN=ERF.C.3 PE=2 SV=1	PF00847	AP2 domain	GO:0006355	regulation of transcription, DNA-templated	GO:0003700	DNA-binding transcription factor activity	GO:0005667	transcription regulator complex	--	--	DOWN	-2.2974	7.4063e-96	blast,frame:-2 start:1258 end:362
Cluster-3181.33712-0F	bHLH	bHLH	Cluster-3181.33712	1226786052	XP_021842274.1	672	1.6e-67	transcription factor bHLH118-like [Spinacia oleracea]	XM_021909537.1	XM_021909537	104	3.93554e-45	PREDICTED: Chenopodium quinoa transcription factor bHLH126-like (LOC110729753), mRNA	--	--	--	--	Q9STJ6	293	5.3e-25	Transcription factor bHLH126 OS=Arabidopsis thaliana OX=3702 GN=BHLH126 PE=2 SV=1	PF03850//PF00010	Transcription factor Tfb4//Helix-loop-helix DNA-binding domain	GO:0006355//GO:0006289	regulation of transcription, DNA-templated//nucleotide-excision repair	GO:0046983	protein dimerization activity	GO:0000439	transcription factor TFIIH core complex	--	--	DOWN	-2.4334	2.0742e-27	blast,frame:1 start:352 end:1203
Cluster-3181.34810-2R	SNF2	SNF2	Cluster-3181.34810	1208519175	OWM75378.1	881	1.5e-91	hypothetical protein CDL15_Pgr021542 [Punica granatum]	--	--	--	--	--	K15083	RAD16	DNA repair protein RAD16	http://www.genome.jp/dbget-bin/www_bget?ko:K15083	P79051	293	8.9e-25	ATP-dependent helicase rhp16 OS=Schizosaccharomyces pombe (strain 972 / ATCC 24843) OX=284812 GN=rhp16 PE=3 SV=2	PF00176	SNF2 family N-terminal domain	--	--	GO:0005524	ATP binding	--	--	KOG1001	Helicase-like transcription factor HLTF/DNA helicase RAD5, DEAD-box superfamily	DOWN	-1.2917	9.0647e-12	blast,frame:-2 start:511 end:146
Cluster-3181.34909-0F	TCP	TCP	Cluster-3181.34909	1219095157	XP_021773814.1	1522	7.2e-166	transcription factor TCP4-like [Chenopodium quinoa]	XM_021918122.1	XM_021918122	760	0	PREDICTED: Chenopodium quinoa transcription factor TCP4-like (LOC110737775), mRNA	--	--	--	--	Q8LPR5	614	5.3e-62	Transcription factor TCP4 OS=Arabidopsis thaliana OX=3702 GN=TCP4 PE=1 SV=1	--	--	--	--	--	--	--	--	--	--	DOWN	-1.4469	1.2487e-32	blast,frame:1 start:829 end:2568
Cluster-3181.35741-1R	Jumonji	Jumonji	Cluster-3181.35741	731312721	XP_010676049.1	3160	0	PREDICTED: F-box protein At1g78280 [Beta vulgaris subsp. vulgaris]	XM_010677747.2	XM_010677747	1127	0	PREDICTED: Beta vulgaris subsp. vulgaris F-box protein At1g78280 (LOC104891956), mRNA	--	--	--	--	Q9M9E8	2326	2.7e-260	F-box protein At1g78280 OS=Arabidopsis thaliana OX=3702 GN=At1g78280 PE=2 SV=3	PF00190	Cupin	--	--	GO:0045735	nutrient reservoir activity	--	--	KOG2131	Uncharacterized conserved protein, contains JmjC domain	UP	1.1696	1.1253e-52	blast,frame:-1 start:750 end:223|blast,frame:-2 start:3680 end:1503
Cluster-3181.36582-1R	FAR1	FAR1	Cluster-3181.36582	731367247	XP_010695505.1	1895	5.2e-209	PREDICTED: protein FAR1-RELATED SEQUENCE 6-like [Beta vulgaris subsp. vulgaris]	--	--	--	--	--	--	--	--	--	Q9SWG3	869	1.9e-91	Protein FAR-RED IMPAIRED RESPONSE 1 OS=Arabidopsis thaliana OX=3702 GN=FAR1 PE=1 SV=1	PF03153//PF00872	Transcription factor IIA, alpha/beta subunit//Transposase, Mutator family	GO:0006367//GO:0006313	transcription initiation from RNA polymerase II promoter//transposition, DNA-mediated	GO:0004803//GO:0003677	transposase activity//DNA binding	GO:0005672	transcription factor TFIIA complex	--	--	DOWN	-1.2938	9.5209e-06	--
Cluster-3181.36588-1F	WRKY	WRKY	Cluster-3181.36588	1226830717	XP_021864534.1	274	1e-21	probable WRKY transcription factor 3 [Spinacia oleracea]	--	--	--	--	--	--	--	--	--	P59583	192	1.3e-13	Probable WRKY transcription factor 32 OS=Arabidopsis thaliana OX=3702 GN=WRKY32 PE=2 SV=1	PF03106	WRKY DNA -binding domain	GO:0006355	regulation of transcription, DNA-templated	GO:0003700//GO:0043565	DNA-binding transcription factor activity//sequence-specific DNA binding	GO:0005667	transcription regulator complex	--	--	UP	1.6687	0.047857	--
Cluster-3181.36861-0F	C2C2-Dof	C2C2->C2C2-Dof	Cluster-3181.36861	870852719	KMT04634.1	301	1.2e-24	hypothetical protein BVRB_8g182870 [Beta vulgaris subsp. vulgaris]	XM_023021233.1	XM_023021233	61	2.18924e-21	PREDICTED: Olea europaea var. sylvestris dof zinc finger protein DOF3.1-like (LOC111395248), mRNA	--	--	--	--	Q9SVC5	249	4.7e-20	Dof zinc finger protein DOF3.5 OS=Arabidopsis thaliana OX=3702 GN=DOF3.5 PE=3 SV=1	PF02701	Dof domain, zinc finger	GO:0006355	regulation of transcription, DNA-templated	GO:0003677	DNA binding	--	--	--	--	DOWN	-2.7714	8.371e-20	blast,frame:1 start:1 end:852
Cluster-3181.38196-1R	GRAS	GRAS	Cluster-3181.38196	1219102545	XP_021714509.1	2005	5.5e-222	LOW QUALITY PROTEIN: scarecrow-like protein 4 [Chenopodium quinoa]	XM_021862307.1	XM_021862307	529	0	PREDICTED: Chenopodium quinoa scarecrow-like protein 4 (LOC110685787), mRNA	--	--	--	--	A0A024B7I0	1471	1.7e-161	SCARECROW-LIKE protein 7 OS=Populus euphratica OX=75702 GN=SCL7 PE=2 SV=1	--	--	--	--	--	--	--	--	--	--	DOWN	-1.1284	3.135e-14	blast,frame:-2 start:2198 end:267
Cluster-3181.39748-1R	bHLH	bHLH	Cluster-3181.39748	1219123221	XP_021724915.1	613	7.2e-61	transcription factor bHLH84-like [Chenopodium quinoa]	XM_021996475.1	XM_021996475	255	2.93022e-129	PREDICTED: Spinacia oleracea transcription factor bHLH54-like (LOC110791711), mRNA	--	--	--	--	Q7XHI9	441	2.4e-42	Transcription factor bHLH84 OS=Arabidopsis thaliana OX=3702 GN=BHLH84 PE=1 SV=1	PF00010//PF04281//PF06941	Helix-loop-helix DNA-binding domain//Mitochondrial import receptor subunit Tom22//5' nucleotidase, deoxy (Pyrimidine), cytosolic type C protein (NT5C)	GO:0006886//GO:0009264	intracellular protein transport//deoxyribonucleotide catabolic process	GO:0008253//GO:0046983	5'-nucleotidase activity//protein dimerization activity	GO:0005741	mitochondrial outer membrane	--	--	DOWN	-5.9223	0.00028134	blast,frame:-2 start:865 end:278
Cluster-3181.39749-1F	bHLH	bHLH	Cluster-3181.39749	1219123221	XP_021724915.1	613	5.9e-61	transcription factor bHLH84-like [Chenopodium quinoa]	XM_021996475.1	XM_021996475	255	2.38317e-129	PREDICTED: Spinacia oleracea transcription factor bHLH54-like (LOC110791711), mRNA	--	--	--	--	Q7XHI9	441	2e-42	Transcription factor bHLH84 OS=Arabidopsis thaliana OX=3702 GN=BHLH84 PE=1 SV=1	PF04281//PF00010	Mitochondrial import receptor subunit Tom22//Helix-loop-helix DNA-binding domain	GO:0006886	intracellular protein transport	GO:0046983	protein dimerization activity	GO:0005741	mitochondrial outer membrane	--	--	DOWN	-5.8478	4.4326e-05	blast,frame:2 start:326 end:913
Cluster-3181.41405-0F	MYB-related	MYB->MYB-related	Cluster-3181.41405	1219171185	XP_021749216.1	263	1.5e-20	myb-related protein 306-like [Chenopodium quinoa]	XM_010679563.2	XM_010679563	110	6.15305e-49	PREDICTED: Beta vulgaris subsp. vulgaris myb-related protein 306 (LOC104893457), transcript variant X2, mRNA	K09422	MYBP	myb proto-oncogene protein, plant	http://www.genome.jp/dbget-bin/www_bget?ko:K09422	B3VTV7	254	6.2e-21	Transcription factor MYB60 OS=Vitis vinifera OX=29760 GN=MYB60 PE=2 SV=1	PF09111	SLIDE	GO:0006338	chromatin remodeling	GO:0003676//GO:0005524//GO:0016818	nucleic acid binding//ATP binding//hydrolase activity, acting on acid anhydrides, in phosphorus-containing anhydrides	GO:0005634	nucleus	--	--	DOWN	-2.3445	0.034027	blast,frame:1 start:28 end:222
Cluster-3181.41991-1R	GRAS	GRAS	Cluster-3181.41991	1226828976	XP_021863662.1	2601	4.6e-291	scarecrow-like protein 30 [Spinacia oleracea]	XM_022007970.1	XM_022007970	962	0	PREDICTED: Spinacia oleracea scarecrow-like protein 30 (LOC110802542), mRNA	--	--	--	--	Q9XE58	1150	3.2e-124	Scarecrow-like protein 14 OS=Arabidopsis thaliana OX=3702 GN=SCL14 PE=2 SV=2	PF05821	NADH-ubiquinone oxidoreductase ASHI subunit (CI-ASHI or NDUFB8)	GO:0006118//GO:0006814//GO:0006744//GO:0006120	obsolete electron transport//sodium ion transport//ubiquinone biosynthetic process//mitochondrial electron transport, NADH to ubiquinone	GO:0008137//GO:0003954	NADH dehydrogenase (ubiquinone) activity//NADH dehydrogenase activity	GO:0005739	mitochondrion	--	--	DOWN	-1.656	3.9468e-59	blast,frame:-2 start:2338 end:173
Cluster-3181.42591-0R	AP2/ERF-ERF	AP2/ERF->AP2/ERF-ERF	Cluster-3181.42591	1219101482	XP_021713958.1	549	7.1e-53	ethylene-responsive transcription factor ERF113-like [Chenopodium quinoa]	XM_021858266.1	XM_021858266	180	5.55363e-87	PREDICTED: Chenopodium quinoa ethylene-responsive transcription factor ERF113-like (LOC110682050), mRNA	--	--	--	--	Q7G1L2	256	2.6e-20	Ethylene-responsive transcription factor RAP2-6 OS=Arabidopsis thaliana OX=3702 GN=RAP2-6 PE=2 SV=2	PF00847	AP2 domain	GO:0006355	regulation of transcription, DNA-templated	GO:0003700	DNA-binding transcription factor activity	GO:0005667	transcription regulator complex	--	--	UP	5.0917	1.7526e-122	blast,frame:-3 start:4490 end:3795|blast,frame:-1 start:1141 end:392
Cluster-3181.45190-2R	SET	SET	Cluster-3181.45190	1219117879	XP_021722197.1	2837	0	probable inactive histone-lysine N-methyltransferase SUVR2 [Chenopodium quinoa]	XM_021866505.1	XM_021866505	966	0	PREDICTED: Chenopodium quinoa probable inactive histone-lysine N-methyltransferase SUVR2 (LOC110689722), transcript variant X2, mRNA	--	--	--	--	Q9FNC7	1069	9.9e-115	Probable inactive histone-lysine N-methyltransferase SUVR2 OS=Arabidopsis thaliana OX=3702 GN=SUVR2 PE=1 SV=2	PF05033//PF10440//PF00856	Pre-SET motif//Ubiquitin-binding WIYLD domain//SET domain	GO:0034968//GO:0006479//GO:0006554	histone lysine methylation//protein methylation//lysine catabolic process	GO:0005515//GO:0008270//GO:0018024	protein binding//zinc ion binding//histone-lysine N-methyltransferase activity	GO:0005634	nucleus	KOG1082	Histone H3 (Lys9) methyltransferase SUV39H1/Clr4, required for transcriptional silencing	DOWN	-1.242	3.7342e-13	blast,frame:-3 start:2883 end:433
Cluster-3181.4790-1R	AUX/IAA	AUX/IAA	Cluster-3181.4790	1373768197	AVV48468.1	171	1.9e-09	IAA13 [Bassia scoparia]	MF376160.1	MF376160	94	1.38794e-39	Bassia scoparia IAA13 mRNA, complete cds	K14484	IAA	auxin-responsive protein IAA	http://www.genome.jp/dbget-bin/www_bget?ko:K14484	Q38831	136	8.3e-07	Auxin-responsive protein IAA13 OS=Arabidopsis thaliana OX=3702 GN=IAA13 PE=1 SV=2	--	--	--	--	--	--	--	--	--	--	DOWN	-2.1245	7.9387e-07	blast,frame:-2 start:197 end:12
Cluster-3181.582-1F	AUX/IAA	AUX/IAA	Cluster-3181.582	1219137466	XP_021732096.1	689	9e-70	auxin-induced protein IAA6-like [Chenopodium quinoa]	XM_021992392.1	XM_021992392	251	3.99637e-127	PREDICTED: Spinacia oleracea auxin-induced protein 22A-like (LOC110787752), mRNA	K14484	IAA	auxin-responsive protein IAA	http://www.genome.jp/dbget-bin/www_bget?ko:K14484	P13088	483	2.7e-47	Auxin-induced protein AUX22 OS=Glycine max OX=3847 GN=AUX22 PE=2 SV=1	PF02060	Slow voltage-gated potassium channel	GO:0006811//GO:0006813	ion transport//potassium ion transport	GO:0005249	voltage-gated potassium channel activity	GO:0008076//GO:0016020	voltage-gated potassium channel complex//membrane	--	--	DOWN	-1.2851	0.00099628	blast,frame:2 start:2 end:652
Cluster-3181.5907-1F	MYB	MYB->MYB	Cluster-3181.5907	1219085192	XP_021768784.1	1268	1.1e-136	transcription factor MYB14-like [Chenopodium quinoa]	XM_021980492.1	XM_021980492	400	0	PREDICTED: Spinacia oleracea transcription factor MYB11 (LOC110775895), mRNA	K09422	MYBP	myb proto-oncogene protein, plant	http://www.genome.jp/dbget-bin/www_bget?ko:K09422	O22264	658	2.2e-67	Transcription factor MYB12 OS=Arabidopsis thaliana OX=3702 GN=MYB12 PE=1 SV=1	--	--	--	--	--	--	--	--	--	--	DOWN	-2.7099	4.4449e-06	blast,frame:2 start:185 end:1381
Cluster-3181.6892-2F	WRKY	WRKY	Cluster-3181.6892	902236821	KNA24554.1	660	4.2e-66	hypothetical protein SOVF_014630 [Spinacia oleracea]	MG356655.1	MG356655	74	2.0224e-28	Canarium album WRKY transcription factor 55 mRNA, complete cds	--	--	--	--	Q9SHB5	342	1.2e-30	WRKY transcription factor 55 OS=Arabidopsis thaliana OX=3702 GN=WRKY55 PE=2 SV=1	PF03106	WRKY DNA -binding domain	GO:0006355	regulation of transcription, DNA-templated	GO:0003700//GO:0043565	DNA-binding transcription factor activity//sequence-specific DNA binding	GO:0005667	transcription regulator complex	--	--	DOWN	-3.5985	4.3151e-17	blast,frame:3 start:927 end:1622
Cluster-3181.6910-0F	AUX/IAA	AUX/IAA	Cluster-3181.6910	1373768197	AVV48468.1	174	9.3e-10	IAA13 [Bassia scoparia]	XM_021992780.1	XM_021992780	168	1.10093e-80	PREDICTED: Spinacia oleracea auxin-responsive protein IAA12-like (LOC110788135), mRNA	K14484	IAA	auxin-responsive protein IAA	http://www.genome.jp/dbget-bin/www_bget?ko:K14484	--	--	--	--	--	--	--	--	--	--	--	--	--	--	UP	1.3146	0.0036904	blast,frame:1 start:1333 end:1479
Cluster-3181.8203-0F	SBP	SBP	Cluster-3181.8203	902200858	KNA13842.1	325	3.6e-27	hypothetical protein SOVF_112880 isoform A [Spinacia oleracea]	XM_021884935.1	XM_021884935	111	6.81567e-49	PREDICTED: Chenopodium quinoa squamosa promoter-binding protein 1-like (LOC110706936), transcript variant X1, mRNA	--	--	--	--	P93015	202	2.5e-14	Squamosa promoter-binding-like protein 3 OS=Arabidopsis thaliana OX=3702 GN=SPL3 PE=1 SV=2	PF03110	SBP domain	--	--	GO:0003677	DNA binding	GO:0005634	nucleus	--	--	UP	1.5408	6.7146e-33	blast,frame:3 start:1827 end:1964|blast,frame:1 start:541 end:906
Cluster-3181.8203-2F	SBP	SBP	Cluster-3181.8203	902200858	KNA13842.1	325	3.6e-27	hypothetical protein SOVF_112880 isoform A [Spinacia oleracea]	XM_021884935.1	XM_021884935	111	6.81567e-49	PREDICTED: Chenopodium quinoa squamosa promoter-binding protein 1-like (LOC110706936), transcript variant X1, mRNA	--	--	--	--	P93015	202	2.5e-14	Squamosa promoter-binding-like protein 3 OS=Arabidopsis thaliana OX=3702 GN=SPL3 PE=1 SV=2	PF03110	SBP domain	--	--	GO:0003677	DNA binding	GO:0005634	nucleus	--	--	UP	1.5408	6.7146e-33	blast,frame:3 start:1827 end:1964|blast,frame:1 start:541 end:906
Cluster-3181.8472-1R	C2C2-Dof	C2C2->C2C2-Dof	Cluster-3181.8472	1219164954	XP_021746110.1	850	2.5e-88	dof zinc finger protein DOF2.1-like [Chenopodium quinoa]	XM_022875378.1	XM_022875378	118	4.45162e-53	PREDICTED: Durio zibethinus dof zinc finger protein DOF2.1-like (LOC111285777), mRNA	--	--	--	--	Q84TE9	354	3.1e-32	Dof zinc finger protein DOF5.3 OS=Arabidopsis thaliana OX=3702 GN=DOF5.3 PE=2 SV=1	PF02701//PF14369	Dof domain, zinc finger//zinc-ribbon	GO:0006355	regulation of transcription, DNA-templated	GO:0061630//GO:0003677	ubiquitin protein ligase activity//DNA binding	--	--	--	--	DOWN	-2.2807	2.0892e-39	--
Cluster-3181.9216-1R	AP2/ERF-ERF	AP2/ERF->AP2/ERF-ERF	Cluster-3181.9216	1219169977	XP_021748599.1	441	7.5e-41	ethylene-responsive transcription factor ERF043-like [Chenopodium quinoa]	XM_021892907.1	XM_021892907	191	1.31988e-93	PREDICTED: Chenopodium quinoa ethylene-responsive transcription factor ERF043-like (LOC110714401), mRNA	--	--	--	--	Q9M210	347	2.3e-31	Ethylene-responsive transcription factor ERF035 OS=Arabidopsis thaliana OX=3702 GN=ERF035 PE=2 SV=1	PF00847//PF06072	AP2 domain//Alphaherpesvirus tegument protein US9	GO:0075733//GO:0006355	intracellular transport of virus//regulation of transcription, DNA-templated	GO:0003700	DNA-binding transcription factor activity	GO:0005667	transcription regulator complex	--	--	UP	3.422	4.0379e-134	blast,frame:-2 start:1336 end:260
Cluster-5441.1-1F	B3	B3->B3	Cluster-5441.1	1219142970	XP_021734854.1	939	1.9e-98	B3 domain-containing protein REM16-like [Chenopodium quinoa]	XM_021984693.1	XM_021984693	153	2.48787e-72	PREDICTED: Spinacia oleracea B3 domain-containing protein REM16-like (LOC110780269), mRNA	--	--	--	--	Q8RYD1	258	6.6e-21	B3 domain-containing protein REM16 OS=Arabidopsis thaliana OX=3702 GN=REM16 PE=2 SV=1	PF15050//PF02362	SCIMP protein//B3 DNA binding domain	--	--	GO:0003677	DNA binding	GO:0097197//GO:0001772//GO:0016021	tetraspanin-enriched microdomain//immunological synapse//integral component of membrane	--	--	DOWN	-2.1688	2.3406e-14	blast,frame:2 start:608 end:1648
Cluster-5868.0-0R	GNAT	GNAT	Cluster-5868.0	1219107741	XP_021717118.1	1705	2.4e-187	probable N-acetyltransferase HLS1 [Chenopodium quinoa]	XM_021861426.1	XM_021861426	684	0	PREDICTED: Chenopodium quinoa probable N-acetyltransferase HLS1 (LOC110684979), mRNA	--	--	--	--	Q42381	808	9.3e-85	Probable N-acetyltransferase HLS1 OS=Arabidopsis thaliana OX=3702 GN=HLS1 PE=1 SV=1	PF08445//PF13508//PF13673//PF00583//PF13302	FR47-like protein//Acetyltransferase (GNAT) domain//Acetyltransferase (GNAT) domain//Acetyltransferase (GNAT) family//Acetyltransferase (GNAT) domain	GO:0042967	obsolete acyl-carrier-protein biosynthetic process	GO:0016747//GO:0008080	transferase activity, transferring acyl groups other than amino-acyl groups//N-acetyltransferase activity	--	--	--	--	DOWN	-2.0156	0.00019307	blast,frame:-1 start:1646 end:366
Cluster-6930.1-1F	WRKY	WRKY	Cluster-6930.1	1219101529	XP_021713981.1	898	6e-94	probable WRKY transcription factor 13 [Chenopodium quinoa]	XM_010682026.2	XM_010682026	356	0	PREDICTED: Beta vulgaris subsp. vulgaris probable WRKY transcription factor 13 (LOC104895497), mRNA	--	--	--	--	Q9SVB7	497	7.2e-49	Probable WRKY transcription factor 13 OS=Arabidopsis thaliana OX=3702 GN=WRKY13 PE=2 SV=1	PF03106	WRKY DNA -binding domain	GO:0006355	regulation of transcription, DNA-templated	GO:0003700//GO:0043565	DNA-binding transcription factor activity//sequence-specific DNA binding	GO:0005667	transcription regulator complex	--	--	DOWN	-2.0529	5.889e-08	blast,frame:2 start:302 end:1060
Cluster-7826.0-2R	AUX/IAA	AUX/IAA	Cluster-7826.0	1219172490	XP_021749879.1	211	3.9e-14	uncharacterized protein LOC110715595 [Chenopodium quinoa]	LN713259.1	LN713259	45	2.11165e-12	Cucumis melo genomic chromosome, chr_5	--	--	--	--	Q38831	139	3.3e-07	Auxin-responsive protein IAA13 OS=Arabidopsis thaliana OX=3702 GN=IAA13 PE=1 SV=2	--	--	--	--	--	--	--	--	--	--	UP	2.0529	9.8436e-05	--
Cluster-10015.0-2F	LOB	LOB	Cluster-10015.0	1219086082	XP_021769215.1	694	1.8e-70	LOB domain-containing protein 21-like [Chenopodium quinoa]	XM_021876963.1	XM_021876963	263	6.49404e-134	PREDICTED: Chenopodium quinoa LOB domain-containing protein 21-like (LOC110699463), mRNA	--	--	--	--	Q9SRL8	446	4e-43	LOB domain-containing protein 21 OS=Arabidopsis thaliana OX=3702 GN=LBD21 PE=2 SV=1	--	--	--	--	--	--	--	--	--	--	DOWN	-2.6675	2.8864e-10	blast,frame:3 start:84 end:680
Cluster-10149.1-2F	C2H2	C2H2	Cluster-10149.1	1219122231	XP_021724422.1	348	4.7e-30	protein SENSITIVE TO PROTON RHIZOTOXICITY 2-like [Chenopodium quinoa]	XM_021775474.1	XM_021775474	36	2.01075e-07	PREDICTED: Manihot esculenta protein SENSITIVE TO PROTON RHIZOTOXICITY 1-like (LOC110628682), mRNA	--	--	--	--	Q0WT24	224	4.3e-17	Protein SENSITIVE TO PROTON RHIZOTOXICITY 2 OS=Arabidopsis thaliana OX=3702 GN=STOP2 PE=2 SV=1	PF00096//PF02892	Zinc finger, C2H2 type//BED zinc finger	--	--	GO:0003677//GO:0003676	DNA binding//nucleic acid binding	--	--	--	--	DOWN	-8.4875	3.0016e-11	--
Cluster-10554.0-1F	bHLH	bHLH	Cluster-10554.0	731338441	XP_010680330.1	752	4.9e-77	PREDICTED: transcription factor bHLH30-like [Beta vulgaris subsp. vulgaris]	XM_021872477.1	XM_021872477	345	2.47052e-179	PREDICTED: Chenopodium quinoa transcription factor bHLH30-like (LOC110695234), transcript variant X2, mRNA	--	--	--	--	Q9S7Y1	269	1.9e-22	Transcription factor bHLH30 OS=Arabidopsis thaliana OX=3702 GN=BHLH30 PE=1 SV=1	PF02346//PF00010//PF11744	Chordopoxvirus multifunctional envelope protein A27//Helix-loop-helix DNA-binding domain//Aluminium activated malate transporter	GO:0015743//GO:0019064	malate transport//fusion of virus membrane with host plasma membrane	GO:0046983	protein dimerization activity	GO:0019031	viral envelope	--	--	DOWN	-1.7999	6.4012e-05	blast,frame:2 start:2 end:826
Cluster-10820.0-0F	Others	Others	Cluster-10820.0	731312032	XP_010672311.1	787	4.3e-81	PREDICTED: B-box zinc finger protein 20 [Beta vulgaris subsp. vulgaris]	XM_010674009.2	XM_010674009	243	1.2377e-122	PREDICTED: Beta vulgaris subsp. vulgaris B-box zinc finger protein 20 (LOC104888895), mRNA	--	--	--	--	Q9LQZ7	554	1.7e-55	B-box zinc finger protein 21 OS=Arabidopsis thaliana OX=3702 GN=BBX21 PE=1 SV=1	PF00643	B-box zinc finger	--	--	GO:0008270	zinc ion binding	--	--	--	--	DOWN	-4.8213	0.0021736	blast,frame:1 start:1 end:972
Cluster-11072.0-1F	B3	B3->B3	Cluster-11072.0	1226796446	XP_021847517.1	984	7.9e-104	B3 domain-containing protein REM16-like [Spinacia oleracea]	--	--	--	--	--	--	--	--	--	Q8RYD1	263	1.2e-21	B3 domain-containing protein REM16 OS=Arabidopsis thaliana OX=3702 GN=REM16 PE=2 SV=1	PF04014//PF02362	Antidote-toxin recognition MazE, bacterial antitoxin//B3 DNA binding domain	--	--	GO:0003677	DNA binding	--	--	--	--	DOWN	-2.0744	0.0012942	blast,frame:2 start:2 end:1141
Cluster-11098.0-0F	bHLH	bHLH	Cluster-11098.0	1226780220	XP_021855535.1	731	1.9e-74	transcription factor bHLH14-like [Spinacia oleracea]	XM_019249481.1	XM_019249481	83	1.56394e-33	PREDICTED: Beta vulgaris subsp. vulgaris transcription factor bHLH14-like (LOC104892626), transcript variant X1, mRNA	--	--	--	--	Q39204	248	7.4e-20	Transcription factor MYC2 OS=Arabidopsis thaliana OX=3702 GN=MYC2 PE=1 SV=2	PF00010	Helix-loop-helix DNA-binding domain	--	--	GO:0046983	protein dimerization activity	--	--	--	--	UP	3.6243	1.0911e-17	blast,frame:1 start:82 end:1221
Cluster-11173.0-1R	GARP-G2-like	GARP->GARP-G2-like	Cluster-11173.0	870868457	KMT19282.1	715	1.2e-72	hypothetical protein BVRB_1g012890 [Beta vulgaris subsp. vulgaris]	XM_021866965.1	XM_021866965	214	2.03994e-106	PREDICTED: Chenopodium quinoa probable transcription factor KAN4 (LOC110690138), mRNA	--	--	--	--	Q9FJV5	366	1.3e-33	Probable transcription factor KAN4 OS=Arabidopsis thaliana OX=3702 GN=KAN4 PE=1 SV=1	--	--	--	--	--	--	--	--	--	--	DOWN	-1.8399	0.032961	blast,frame:-2 start:1285 end:182
Cluster-15164.0-1R	GRAS	GRAS	Cluster-15164.0	1226813094	XP_021855794.1	1310	1.3e-141	scarecrow-like protein 23 [Spinacia oleracea]	--	--	--	--	--	--	--	--	--	Q9FHZ1	929	7.7e-99	Scarecrow-like protein 23 OS=Arabidopsis thaliana OX=3702 GN=SCL23 PE=1 SV=1	PF02538	Hydantoinase B/oxoprolinase	--	--	GO:0003824	catalytic activity	--	--	--	--	DOWN	-2.6103	8.3851e-05	blast,frame:-2 start:1484 end:282
Cluster-3181.1098-1F	B3	B3->B3	Cluster-3181.1098	870846940	KMS99399.1	294	3.8e-24	hypothetical protein BVRB_2g045220 [Beta vulgaris subsp. vulgaris]	--	--	--	--	--	--	--	--	--	--	--	--	--	PF02362	B3 DNA binding domain	--	--	GO:0003677	DNA binding	--	--	--	--	UP	5.7333	0.00071906	blast,frame:2 start:2 end:319
Cluster-3181.11041-0R	C2H2	C2H2	Cluster-3181.11041	1216298512	XP_021634379.1	701	3e-71	zinc finger protein WIP6-like [Manihot esculenta]	XM_011078921.1	XM_011078921	110	7.74219e-49	PREDICTED: Sesamum indicum zinc finger protein WIP6 (LOC105161277), mRNA	--	--	--	--	Q9FX68	661	4.9e-68	Zinc finger protein WIP6 OS=Arabidopsis thaliana OX=3702 GN=WIP6 PE=2 SV=1	PF00096	Zinc finger, C2H2 type	--	--	GO:0003676	nucleic acid binding	--	--	--	--	DOWN	-2.6871	0.0022502	--
Cluster-3181.1114-0F	LIM	LIM	Cluster-3181.1114	902213804	KNA17338.1	892	2.8e-93	hypothetical protein SOVF_080450 [Spinacia oleracea]	XM_021872731.1	XM_021872731	373	0	PREDICTED: Chenopodium quinoa LIM domain-containing protein WLIM1-like (LOC110695503), mRNA	K09377	CSRP	cysteine and glycine-rich protein	http://www.genome.jp/dbget-bin/www_bget?ko:K09377	Q94JX5	733	2.9e-76	LIM domain-containing protein WLIM1 OS=Arabidopsis thaliana OX=3702 GN=WLIM1 PE=1 SV=1	PF06152//PF00243	Phage minor capsid protein 2//Nerve growth factor family	GO:0007165	signal transduction	GO:0005102//GO:0005198	signaling receptor binding//structural molecule activity	--	--	--	--	DOWN	-1.0608	3.1984e-09	blast,frame:1 start:166 end:750
Cluster-3181.117-0F	WRKY	WRKY	Cluster-3181.117	1219063244	XP_021757515.1	448	1.2e-41	WRKY transcription factor 22-like [Chenopodium quinoa]	XM_021861446.1	XM_021861446	44	7.17597e-12	PREDICTED: Chenopodium quinoa putative disease resistance protein RGA3 (LOC110684993), mRNA	K13425	WRKY22	WRKY transcription factor 22	http://www.genome.jp/dbget-bin/www_bget?ko:K13425	O04609	195	9.9e-14	WRKY transcription factor 22 OS=Arabidopsis thaliana OX=3702 GN=WRKY22 PE=2 SV=1	PF03106	WRKY DNA -binding domain	GO:0006355	regulation of transcription, DNA-templated	GO:0043565//GO:0003700	sequence-specific DNA binding//DNA-binding transcription factor activity	GO:0005667	transcription regulator complex	--	--	DOWN	-1.743	0.00053278	blast,frame:3 start:714 end:1223|blast,frame:1 start:154 end:651
Cluster-3181.117-2F	WRKY	WRKY	Cluster-3181.117	1219063244	XP_021757515.1	448	1.2e-41	WRKY transcription factor 22-like [Chenopodium quinoa]	XM_021861446.1	XM_021861446	44	7.17597e-12	PREDICTED: Chenopodium quinoa putative disease resistance protein RGA3 (LOC110684993), mRNA	K13425	WRKY22	WRKY transcription factor 22	http://www.genome.jp/dbget-bin/www_bget?ko:K13425	O04609	195	9.9e-14	WRKY transcription factor 22 OS=Arabidopsis thaliana OX=3702 GN=WRKY22 PE=2 SV=1	PF03106	WRKY DNA -binding domain	GO:0006355	regulation of transcription, DNA-templated	GO:0043565//GO:0003700	sequence-specific DNA binding//DNA-binding transcription factor activity	GO:0005667	transcription regulator complex	--	--	DOWN	-1.743	0.00053278	blast,frame:3 start:714 end:1223|blast,frame:1 start:154 end:651
Cluster-3181.11719-2R	NF-YA	NF-Y->NF-YA	Cluster-3181.11719	1219172825	XP_021750058.1	1190	2.8e-127	nuclear transcription factor Y subunit A-7-like isoform X1 [Chenopodium quinoa]	XM_010668149.1	XM_010668149	468	0	PREDICTED: Beta vulgaris subsp. vulgaris nuclear transcription factor Y subunit A-7-like (LOC104883604), mRNA	K08064	NFYA	nuclear transcription factor Y, alpha	http://www.genome.jp/dbget-bin/www_bget?ko:K08064	Q93ZH2	365	5e-33	Nuclear transcription factor Y subunit A-3 OS=Arabidopsis thaliana OX=3702 GN=NFYA3 PE=2 SV=2	PF00440//PF02045	Bacterial regulatory proteins, tetR family//CCAAT-binding transcription factor (CBF-B/NF-YA) subunit B	GO:0006355	regulation of transcription, DNA-templated	GO:0003700//GO:0003677	DNA-binding transcription factor activity//DNA binding	GO:0005667	transcription regulator complex	--	--	DOWN	-1.589	7.7372e-38	blast,frame:-3 start:1536 end:439
Cluster-3181.11898-2F	TCP	TCP	Cluster-3181.11898	1219062057	XP_021756900.1	1062	1.2e-112	transcription factor TCP4-like [Chenopodium quinoa]	XM_010691445.2	XM_010691445	553	0	PREDICTED: Beta vulgaris subsp. vulgaris transcription factor TCP4 (LOC104903419), mRNA	--	--	--	--	Q8LPR5	532	1.3e-52	Transcription factor TCP4 OS=Arabidopsis thaliana OX=3702 GN=TCP4 PE=1 SV=1	PF05902	4.1 protein C-terminal domain (CTD)	--	--	GO:0005198//GO:0003779	structural molecule activity//actin binding	GO:0005856	cytoskeleton	--	--	DOWN	-1.0558	9.0011e-15	blast,frame:3 start:408 end:1829
Cluster-3181.12378-1R	C2H2	C2H2	Cluster-3181.12378	870858189	KMT09715.1	1892	8.4e-209	hypothetical protein BVRB_6g131640 [Beta vulgaris subsp. vulgaris]	XM_022000325.1	XM_022000325	829	0	PREDICTED: Spinacia oleracea protein indeterminate-domain 9-like (LOC110795323), transcript variant X1, mRNA	--	--	--	--	Q9ZUL3	842	1.8e-88	Protein indeterminate-domain 5, chloroplastic OS=Arabidopsis thaliana OX=3702 GN=IDD5 PE=1 SV=1	PF00096	Zinc finger, C2H2 type	--	--	GO:0003676	nucleic acid binding	--	--	--	--	DOWN	-1.2784	3.0601e-27	blast,frame:-2 start:2393 end:486
Cluster-3181.12683-0R	C3H	C3H	Cluster-3181.12683	870848410	KMT00699.1	1002	1.8e-105	hypothetical protein BVRB_9g219870 [Beta vulgaris subsp. vulgaris]	XM_010692875.2	XM_010692875	474	0	PREDICTED: Beta vulgaris subsp. vulgaris hypothetical protein (LOC104904587), mRNA	--	--	--	--	P47980	164	1e-09	Protein TIS11 OS=Drosophila melanogaster OX=7227 GN=Tis11 PE=2 SV=2	PF01177//PF00642	Asp/Glu/Hydantoin racemase//Zinc finger C-x8-C-x5-C-x3-H type (and similar)	GO:0006807	nitrogen compound metabolic process	GO:0046872//GO:0036361	metal ion binding//racemase activity, acting on amino acids and derivatives	--	--	KOG1677	CCCH-type Zn-finger protein	DOWN	-1.7685	4.7498e-31	blast,frame:2 start:716 end:1492
Cluster-3181.13458-1F	SBP	SBP	Cluster-3181.13458	870861887	KMT13146.1	288	5.2e-23	hypothetical protein BVRB_4g086850 isoform B [Beta vulgaris subsp. vulgaris]	XM_010677198.2	XM_010677198	71	8.54062e-27	PREDICTED: Beta vulgaris subsp. vulgaris squamosa promoter-binding-like protein 4 (LOC104891496), transcript variant X1, mRNA	--	--	--	--	Q9S7A9	172	5.6e-11	Squamosa promoter-binding-like protein 4 OS=Arabidopsis thaliana OX=3702 GN=SPL4 PE=1 SV=1	PF08188//PF03110	Spermatozal protamine family//SBP domain	GO:0035092	sperm chromatin condensation	GO:0003677	DNA binding	GO:0005634//GO:0000228	nucleus//nuclear chromosome	--	--	DOWN	-1.1269	4.2275e-10	blast,frame:2 start:1169 end:1495
Cluster-3181.14210-2F	B3	B3->B3	Cluster-3181.14210	1108928643	XP_010679359.2	753	4.5e-77	PREDICTED: B3 domain-containing transcription factor VRN1-like isoform X1 [Beta vulgaris subsp. vulgaris]	XM_021914413.1	XM_021914413	107	5.92755e-47	PREDICTED: Chenopodium quinoa B3 domain-containing transcription factor VRN1-like (LOC110734314), transcript variant X1, mRNA	--	--	--	--	Q8L3W1	247	8.1e-20	B3 domain-containing transcription factor VRN1 OS=Arabidopsis thaliana OX=3702 GN=VRN1 PE=1 SV=1	PF02362	B3 DNA binding domain	--	--	GO:0003677	DNA binding	--	--	--	--	DOWN	-2.2259	0.0096806	blast,frame:3 start:72 end:1043
Cluster-3181.14294-2R	C2H2	C2H2	Cluster-3181.14294	870844795	KMS97674.1	1599	6.2e-175	hypothetical protein BVRB_5g124790 [Beta vulgaris subsp. vulgaris]	XM_010697120.2	XM_010697120	604	0	PREDICTED: Beta vulgaris subsp. vulgaris hypothetical protein (LOC104908063), mRNA	--	--	--	--	--	--	--	--	PF00096	Zinc finger, C2H2 type	--	--	GO:0003676	nucleic acid binding	--	--	--	--	DOWN	-2.9353	1.3908e-40	blast,frame:-3 start:2024 end:651
Cluster-3181.14297-2R	GRAS	GRAS	Cluster-3181.14297	1276242229	PIN03194.1	1565	6.9e-171	hypothetical protein CDL12_24287 [Handroanthus impetiginosus]	XM_021918712.1	XM_021918712	240	1.531e-120	PREDICTED: Chenopodium quinoa dirigent protein 22-like (LOC110738342), mRNA	--	--	--	--	Q9LPR8	1314	3.3e-143	Scarecrow-like protein 3 OS=Arabidopsis thaliana OX=3702 GN=SCL3 PE=1 SV=1	PF06351	Allene oxide cyclase	--	--	GO:0016853	isomerase activity	--	--	--	--	DOWN	-1.5611	4.9185e-14	blast,frame:-3 start:2527 end:1169
Cluster-3181.17756-0F	SBP	SBP	Cluster-3181.17756	1219119583	XP_021723074.1	693	1.3e-69	squamosa promoter-binding-like protein 13A [Chenopodium quinoa]	XM_021889619.1	XM_021889619	336	9.30652e-174	PREDICTED: Chenopodium quinoa squamosa promoter-binding-like protein 13A (LOC110711240), mRNA	--	--	--	--	Q6YZE8	401	3.5e-37	Squamosa promoter-binding-like protein 16 OS=Oryza sativa subsp. japonica OX=39947 GN=SPL16 PE=2 SV=1	PF03110	SBP domain	--	--	GO:0003677	DNA binding	GO:0005634	nucleus	--	--	DOWN	-1.8724	1.4264e-65	blast,frame:1 start:1741 end:2331|blast,frame:3 start:2775 end:3410|blast,frame:2 start:431 end:616
Cluster-3181.17867-0F	WRKY	WRKY	Cluster-3181.17867	1219150682	XP_021738819.1	422	1.1e-38	probable WRKY transcription factor 50 isoform X1 [Chenopodium quinoa]	XM_022000115.1	XM_022000115	78	7.65667e-31	PREDICTED: Spinacia oleracea probable WRKY transcription factor 50 (LOC110795133), mRNA	--	--	--	--	Q8VWQ5	184	1.6e-12	Probable WRKY transcription factor 50 OS=Arabidopsis thaliana OX=3702 GN=WRKY50 PE=2 SV=1	PF03106	WRKY DNA -binding domain	GO:0006355	regulation of transcription, DNA-templated	GO:0003700//GO:0043565	DNA-binding transcription factor activity//sequence-specific DNA binding	GO:0005667	transcription regulator complex	--	--	DOWN	-2.9397	1.129e-38	blast,frame:2 start:755 end:904
Cluster-3181.17867-1F	WRKY	WRKY	Cluster-3181.17867	1219150682	XP_021738819.1	422	1.1e-38	probable WRKY transcription factor 50 isoform X1 [Chenopodium quinoa]	XM_022000115.1	XM_022000115	78	7.65667e-31	PREDICTED: Spinacia oleracea probable WRKY transcription factor 50 (LOC110795133), mRNA	--	--	--	--	Q8VWQ5	184	1.6e-12	Probable WRKY transcription factor 50 OS=Arabidopsis thaliana OX=3702 GN=WRKY50 PE=2 SV=1	PF03106	WRKY DNA -binding domain	GO:0006355	regulation of transcription, DNA-templated	GO:0003700//GO:0043565	DNA-binding transcription factor activity//sequence-specific DNA binding	GO:0005667	transcription regulator complex	--	--	DOWN	-2.9397	1.129e-38	blast,frame:2 start:755 end:904
Cluster-3181.18881-2F	NAC	NAC	Cluster-3181.18881	1219080708	XP_021766489.1	220	3.5e-15	NAC domain-containing protein 90-like [Chenopodium quinoa]	XM_021996097.1	XM_021996097	87	9.57942e-36	PREDICTED: Spinacia oleracea NAC domain-containing protein 90-like (LOC110791348), mRNA	--	--	--	--	Q9FMR3	149	2.3e-08	NAC domain-containing protein 90 OS=Arabidopsis thaliana OX=3702 GN=NAC090 PE=1 SV=1	PF02365	No apical meristem (NAM) protein	GO:0006355	regulation of transcription, DNA-templated	GO:0003677	DNA binding	--	--	--	--	DOWN	-1.3205	2.0744e-06	blast,frame:3 start:129 end:362
Cluster-3181.19488-0F	MYB-related	MYB->MYB-related	Cluster-3181.19488	731403076	XP_010654902.1	173	1.4e-09	PREDICTED: uncharacterized protein LOC100256666 [Vitis vinifera]	XM_010667609.2	XM_010667609	93	6.13639e-39	PREDICTED: Beta vulgaris subsp. vulgaris transcription factor MYB1R1 (LOC104883142), mRNA	--	--	--	--	Q9LVS0	151	1.9e-08	Transcription factor KUA1 OS=Arabidopsis thaliana OX=3702 GN=KUA1 PE=1 SV=1	--	--	--	--	--	--	--	--	--	--	DOWN	-1.7621	1.5107e-13	--
Cluster-3181.20507-0R	MADS-MIKC	MADS->MADS-MIKC	Cluster-3181.20507	1590520267	XP_028228974.1	753	5.8e-77	truncated transcription factor CAULIFLOWER A-like isoform X1 [Glycine soja]	XM_021999575.1	XM_021999575	144	2.06443e-67	PREDICTED: Spinacia oleracea truncated transcription factor CAULIFLOWER A-like (LOC110794608), mRNA	--	--	--	--	D7KWY6	528	2.7e-52	Floral homeotic protein APETALA 1 OS=Arabidopsis lyrata subsp. lyrata OX=81972 GN=AP1 PE=3 SV=1	PF11802//PF01486//PF03938//PF06156//PF01763//PF07195//PF07743//PF01496//PF00319//PF10018	Centromere-associated protein K//K-box region//Outer membrane protein (OmpH-like)//Initiation control protein YabA//Herpesvirus UL6 like//Flagellar hook-associated protein 2 C-terminus//HSCB C-terminal oligomerisation domain//V-type ATPase 116kDa subunit family//SRF-type transcription factor (DNA-binding and dimerisation domain)//Vitamin-D-receptor interacting Mediator subunit 4	GO:0006357//GO:0007155//GO:0006323//GO:0006260//GO:0051382//GO:0051259//GO:1902600//GO:0006355	regulation of transcription by RNA polymerase II//cell adhesion//DNA packaging//DNA replication//kinetochore assembly//protein complex oligomerization//proton transmembrane transport//regulation of transcription, DNA-templated	GO:0003712//GO:0003700//GO:0046983//GO:0051082//GO:0015078//GO:0003677	transcription coregulator activity//DNA-binding transcription factor activity//protein dimerization activity//unfolded protein binding//proton transmembrane transporter activity//DNA binding	GO:0016592//GO:0009288//GO:0005667//GO:0005634//GO:0033179	mediator complex//bacterial-type flagellum//transcription regulator complex//nucleus//proton-transporting V-type ATPase, V0 domain	--	--	UP	1.2447	3.0632e-63	--
Cluster-3181.20885-1R	AP2/ERF-AP2	AP2/ERF->AP2/ERF-AP2	Cluster-3181.20885	731337231	XP_010679674.1	1810	2.6e-199	PREDICTED: AP2-like ethylene-responsive transcription factor ANT [Beta vulgaris subsp. vulgaris]	XM_010681372.2	XM_010681372	609	0	PREDICTED: Beta vulgaris subsp. vulgaris AP2-like ethylene-responsive transcription factor ANT (LOC104894983), mRNA	K09285	OVM, ANT	AP2-like factor, ANT lineage	http://www.genome.jp/dbget-bin/www_bget?ko:K09285	Q38914	963	1.6e-102	AP2-like ethylene-responsive transcription factor ANT OS=Arabidopsis thaliana OX=3702 GN=ANT PE=1 SV=2	PF00957//PF00847	Synaptobrevin//AP2 domain	GO:0016192//GO:0006355	vesicle-mediated transport//regulation of transcription, DNA-templated	GO:0003700	DNA-binding transcription factor activity	GO:0005667//GO:0016021	transcription regulator complex//integral component of membrane	--	--	DOWN	-1.979	6.3235e-17	blast,frame:-2 start:2447 end:276
Cluster-3181.22742-2F	NAC	NAC	Cluster-3181.22742	731329470	XP_010675608.1	1066	2.7e-113	PREDICTED: NAC transcription factor 56 [Beta vulgaris subsp. vulgaris]	XM_010677306.2	XM_010677306	381	0	PREDICTED: Beta vulgaris subsp. vulgaris NAC transcription factor 56 (LOC104891597), mRNA	--	--	--	--	Q9LD44	794	3.6e-83	NAC transcription factor 56 OS=Arabidopsis thaliana OX=3702 GN=NAC056 PE=2 SV=1	PF02365	No apical meristem (NAM) protein	GO:0006355	regulation of transcription, DNA-templated	GO:0003677	DNA binding	--	--	--	--	DOWN	-2.3809	4.2288e-09	blast,frame:3 start:48 end:1316
Cluster-3181.22747-2F	HB-HD-ZIP	HB->HB-HD-ZIP	Cluster-3181.22747	1219146841	XP_021736870.1	2687	5.6e-301	homeobox-leucine zipper protein GLABRA 2-like [Chenopodium quinoa]	XM_021876306.1	XM_021876306	1068	0	PREDICTED: Chenopodium quinoa homeobox-leucine zipper protein GLABRA 2-like (LOC110698785), transcript variant X1, mRNA	K09338	HD-ZIP	homeobox-leucine zipper protein	http://www.genome.jp/dbget-bin/www_bget?ko:K09338	P46607	1972	1.7e-219	Homeobox-leucine zipper protein GLABRA 2 OS=Arabidopsis thaliana OX=3702 GN=GL2 PE=2 SV=3	PF05920//PF00046//PF06005//PF01852//PF02183	Homeobox KN domain//Homeodomain//Cell division protein ZapB//START domain//Homeobox associated leucine zipper	GO:0090529//GO:0006355//GO:0043093	cell septum assembly//regulation of transcription, DNA-templated//FtsZ-dependent cytokinesis	GO:0003677//GO:0043565//GO:0008289	DNA binding//sequence-specific DNA binding//lipid binding	GO:0005737	cytoplasm	--	--	DOWN	-1.926	3.799e-72	--
Cluster-3181.22879-2R	Others	Others	Cluster-3181.22879	1219062824	XP_021757297.1	1167	1.1e-124	protein CHLOROPLAST IMPORT APPARATUS 2-like isoform X2 [Chenopodium quinoa]	XM_021913327.1	XM_021913327	747	0	PREDICTED: Chenopodium quinoa protein CHLOROPLAST IMPORT APPARATUS 2-like (LOC110733308), transcript variant X5, mRNA	--	--	--	--	Q9LU68	348	4e-31	Protein CHLOROPLAST IMPORT APPARATUS 2 OS=Arabidopsis thaliana OX=3702 GN=CIA2 PE=1 SV=1	PF06203	CCT motif	--	--	GO:0005515	protein binding	--	--	--	--	DOWN	-2.2412	7.5491e-44	blast,frame:-3 start:1713 end:334
Cluster-3181.23329-2R	Others	Others	Cluster-3181.23329	731321422	XP_010671343.1	303	5.7e-25	PREDICTED: two-component response regulator-like APRR5 isoform X2 [Beta vulgaris subsp. vulgaris]	XM_021907287.1	XM_021907287	129	2.89135e-59	PREDICTED: Chenopodium quinoa two-component response regulator-like APRR5 (LOC110727697), transcript variant X3, mRNA	K12130	PRR5	pseudo-response regulator 5	http://www.genome.jp/dbget-bin/www_bget?ko:K12130	Q6LA42	260	2.1e-21	Two-component response regulator-like APRR5 OS=Arabidopsis thaliana OX=3702 GN=APRR5 PE=1 SV=2	PF00072//PF07650	Response regulator receiver domain//KH domain	GO:0000160	phosphorelay signal transduction system	GO:0003723	RNA binding	--	--	--	--	DOWN	-2.22	1.4701e-38	blast,frame:-3 start:252 end:1
Cluster-3181.24355-2R	AUX/IAA	AUX/IAA	Cluster-3181.24355	1219155967	XP_021741474.1	972	2.1e-102	auxin-responsive protein IAA27-like isoform X2 [Chenopodium quinoa]	XM_021867915.1	XM_021867915	366	0	PREDICTED: Chenopodium quinoa auxin-responsive protein IAA27-like (LOC110690988), mRNA	K14484	IAA	auxin-responsive protein IAA	http://www.genome.jp/dbget-bin/www_bget?ko:K14484	Q9ZSY8	640	2.5e-65	Auxin-responsive protein IAA27 OS=Arabidopsis thaliana OX=3702 GN=IAA27 PE=1 SV=1	--	--	--	--	--	--	--	--	--	--	DOWN	-1.0543	4.0476e-29	--
Cluster-3181.24988-0R	Others	Others	Cluster-3181.24988	1219170460	XP_021748843.1	1004	1.3e-105	two-component response regulator-like APRR3 [Chenopodium quinoa]	XM_021911531.1	XM_021911531	303	2.42684e-155	PREDICTED: Chenopodium quinoa two-component response regulator-like APRR3 (LOC110731655), transcript variant X2, mRNA	K12130	PRR5	pseudo-response regulator 5	http://www.genome.jp/dbget-bin/www_bget?ko:K12130	Q6LA42	532	2.6e-52	Two-component response regulator-like APRR5 OS=Arabidopsis thaliana OX=3702 GN=APRR5 PE=1 SV=2	PF06203//PF00788//PF00072	CCT motif//Ras association (RalGDS/AF-6) domain//Response regulator receiver domain	GO:0007165//GO:0000160	signal transduction//phosphorelay signal transduction system	GO:0005515	protein binding	--	--	--	--	DOWN	-1.308	8.7658e-82	blast,frame:-2 start:4071 end:2947|blast,frame:-1 start:1894 end:1094
Cluster-3181.24988-1R	Others	Others	Cluster-3181.24988	1219170460	XP_021748843.1	1004	1.3e-105	two-component response regulator-like APRR3 [Chenopodium quinoa]	XM_021911531.1	XM_021911531	303	2.42684e-155	PREDICTED: Chenopodium quinoa two-component response regulator-like APRR3 (LOC110731655), transcript variant X2, mRNA	K12130	PRR5	pseudo-response regulator 5	http://www.genome.jp/dbget-bin/www_bget?ko:K12130	Q6LA42	532	2.6e-52	Two-component response regulator-like APRR5 OS=Arabidopsis thaliana OX=3702 GN=APRR5 PE=1 SV=2	PF06203//PF00788//PF00072	CCT motif//Ras association (RalGDS/AF-6) domain//Response regulator receiver domain	GO:0007165//GO:0000160	signal transduction//phosphorelay signal transduction system	GO:0005515	protein binding	--	--	--	--	DOWN	-1.308	8.7658e-82	blast,frame:-2 start:4071 end:2947|blast,frame:-1 start:1894 end:1094
Cluster-3181.25021-0F	mTERF	mTERF	Cluster-3181.25021	902225341	KNA20035.1	1469	9.5e-160	hypothetical protein SOVF_056120 [Spinacia oleracea]	XM_021884963.1	XM_021884963	560	0	PREDICTED: Chenopodium quinoa transcription termination factor MTERF9, chloroplastic (LOC110706955), mRNA	K15032	MTERFD	mTERF domain-containing protein, mitochondrial	http://www.genome.jp/dbget-bin/www_bget?ko:K15032	Q9FM80	894	1.7e-94	Transcription termination factor MTERF9, chloroplastic OS=Arabidopsis thaliana OX=3702 GN=MTERF9 PE=2 SV=1	PF02536	mTERF	GO:0006355	regulation of transcription, DNA-templated	GO:0003690	double-stranded DNA binding	--	--	--	--	DOWN	-1.7032	2.0536e-34	blast,frame:1 start:127 end:1416
Cluster-3181.25029-1R	AP2/ERF-ERF	AP2/ERF->AP2/ERF-ERF	Cluster-3181.25029	1226791238	XP_021844919.1	436	1.4e-40	ethylene-responsive transcription factor 8 [Spinacia oleracea]	--	--	--	--	--	K09286	EREBP	EREBP-like factor	http://www.genome.jp/dbget-bin/www_bget?ko:K09286	Q9MAI5	235	1.1e-18	Ethylene-responsive transcription factor 8 OS=Arabidopsis thaliana OX=3702 GN=ERF8 PE=1 SV=1	PF00847	AP2 domain	GO:0006355	regulation of transcription, DNA-templated	GO:0003700	DNA-binding transcription factor activity	GO:0005667	transcription regulator complex	--	--	DOWN	-1.4671	3.8543e-42	blast,frame:-2 start:694 end:47
Cluster-3181.25154-2F	WRKY	WRKY	Cluster-3181.25154	902143675	KNA04863.1	580	6.1e-57	hypothetical protein SOVF_195750 [Spinacia oleracea]	XM_010694702.2	XM_010694702	179	6.6822e-87	PREDICTED: Beta vulgaris subsp. vulgaris WRKY transcription factor WRKY51-like (LOC104906019), mRNA	--	--	--	--	Q9SV15	438	6.8e-42	Probable WRKY transcription factor 11 OS=Arabidopsis thaliana OX=3702 GN=WRKY11 PE=2 SV=2	PF00906//PF03106//PF02950	Hepatitis core antigen//WRKY DNA -binding domain//Conotoxin	GO:0009405//GO:0006355//GO:0006810	pathogenesis//regulation of transcription, DNA-templated//transport	GO:0005198//GO:0043565//GO:0003700//GO:0008200	structural molecule activity//sequence-specific DNA binding//DNA-binding transcription factor activity//ion channel inhibitor activity	GO:0005667//GO:0005576	transcription regulator complex//extracellular region	--	--	DOWN	-1.6892	1.2399e-80	blast,frame:3 start:3 end:719
Cluster-3181.25295-0R	bHLH	bHLH	Cluster-3181.25295	1219060980	XP_021756332.1	538	3.4e-52	transcription factor UNE10-like isoform X1 [Chenopodium quinoa]	XM_021900641.1	XM_021900641	139	8.63083e-65	PREDICTED: Chenopodium quinoa transcription factor UNE10-like (LOC110721486), transcript variant X2, mRNA	--	--	--	--	Q8GZ38	347	1.8e-31	Transcription factor UNE10 OS=Arabidopsis thaliana OX=3702 GN=UNE10 PE=2 SV=1	PF00010	Helix-loop-helix DNA-binding domain	--	--	GO:0046983	protein dimerization activity	--	--	--	--	DOWN	-1.7087	2.1735e-64	blast,frame:-2 start:244 end:95
Cluster-3181.25836-1R	RWP-RK	RWP-RK	Cluster-3181.25836	--	--	--	--	--	XM_022002146.1	XM_022002146	50	6.15582e-15	PREDICTED: Spinacia oleracea protein MODIFIER OF SNC1 1 (LOC110797047), mRNA	--	--	--	--	--	--	--	--	PF05225//PF09061//PF01890//PF04810	helix-turn-helix, Psq domain//Stirrup//Cobalamin synthesis G C-terminus//Sec23/Sec24 zinc finger	GO:0006888//GO:0006886//GO:0009236	endoplasmic reticulum to Golgi vesicle-mediated transport//intracellular protein transport//cobalamin biosynthetic process	GO:0003677//GO:0016788//GO:0008270	DNA binding//hydrolase activity, acting on ester bonds//zinc ion binding	GO:0030127	COPII vesicle coat	--	--	DOWN	-9.4386	3.9869e-14	--
Cluster-3181.25838-0F	AP2/ERF-ERF	AP2/ERF->AP2/ERF-ERF	Cluster-3181.25838	748302862	AJE59584.1	668	2.2e-67	dehydration-responsive element binding protein [Suaeda salsa]	XM_010695207.2	XM_010695207	152	3.89376e-72	PREDICTED: Beta vulgaris subsp. vulgaris dehydration-responsive element-binding protein 1D (LOC104906454), mRNA	K09286	EREBP	EREBP-like factor	http://www.genome.jp/dbget-bin/www_bget?ko:K09286	Q9FJ93	436	6.8e-42	Dehydration-responsive element-binding protein 1D OS=Arabidopsis thaliana OX=3702 GN=DREB1D PE=2 SV=1	PF01652//PF00847	Eukaryotic initiation factor 4E//AP2 domain	GO:0006355//GO:0006446//GO:0006413	regulation of transcription, DNA-templated//regulation of translational initiation//translational initiation	GO:0003743//GO:0003700//GO:0003723	translation initiation factor activity//DNA-binding transcription factor activity//RNA binding	GO:0005840//GO:0005667	ribosome//transcription regulator complex	--	--	UP	1.1101	2.2091e-68	blast,frame:1 start:94 end:882
Cluster-3181.26378-2R	bHLH	bHLH	Cluster-3181.26378	1219125654	XP_021726181.1	1049	5.2e-111	cysteine-rich receptor-like protein kinase 8 [Chenopodium quinoa]	XM_019251173.1	XM_019251173	377	0	PREDICTED: Beta vulgaris subsp. vulgaris putative receptor-like protein kinase At4g00960 (LOC104901131), mRNA	--	--	--	--	Q8GYA4	853	1.1e-89	Cysteine-rich receptor-like protein kinase 10 OS=Arabidopsis thaliana OX=3702 GN=CRK10 PE=1 SV=3	PF00069//PF00010//PF00992//PF07714//PF06005//PF04136//PF09726//PF06156	Protein kinase domain//Helix-loop-helix DNA-binding domain//Troponin//Protein tyrosine and serine/threonine kinase//Cell division protein ZapB//Sec34-like family//Macoilin family//Initiation control protein YabA	GO:0090529//GO:0023041//GO:0043093//GO:0006468//GO:0006886//GO:0006260	cell septum assembly//neuronal signal transduction//FtsZ-dependent cytokinesis//protein phosphorylation//intracellular protein transport//DNA replication	GO:0004672//GO:0005524//GO:0046983	protein kinase activity//ATP binding//protein dimerization activity	GO:0005737//GO:0005801//GO:0016020//GO:0005861//GO:0030867	cytoplasm//cis-Golgi network//membrane//troponin complex//rough endoplasmic reticulum membrane	--	--	UP	1.2488	9.1137e-09	blast,frame:1 start:28 end:1035|blast,frame:3 start:1131 end:1955
Cluster-3181.26544-0R	Tify	Tify	Cluster-3181.26544	731348013	XP_010685279.1	521	5.4e-50	PREDICTED: protein TIFY 10A-like [Beta vulgaris subsp. vulgaris]	--	--	--	--	--	K13464	JAZ	jasmonate ZIM domain-containing protein	http://www.genome.jp/dbget-bin/www_bget?ko:K13464	Q9LMA8	215	6.2e-16	Protein TIFY 10A OS=Arabidopsis thaliana OX=3702 GN=TIFY10A PE=1 SV=1	--	--	--	--	--	--	--	--	--	--	UP	1.1031	7.1699e-52	blast,frame:-1 start:1147 end:506|blast,frame:-2 start:1560 end:1309
Cluster-3181.27359-1R	Whirly	Whirly	Cluster-3181.27359	1226848925	XP_021838216.1	177	7.9e-10	uncharacterized protein LOC110777953 [Spinacia oleracea]	XM_021867268.1	XM_021867268	116	1.69622e-51	PREDICTED: Chenopodium quinoa single-stranded DNA-binding protein WHY1, chloroplastic-like (LOC110690436), mRNA	--	--	--	--	Q66GR6	154	1.4e-08	Single-stranded DNA-binding protein WHY3, chloroplastic OS=Arabidopsis thaliana OX=3702 GN=WHY3 PE=1 SV=1	PF00097//PF13456//PF08536	Zinc finger, C3HC4 type (RING finger)//Reverse transcriptase-like//Whirly transcription factor	GO:0006952//GO:0006355//GO:0051252	defense response//regulation of transcription, DNA-templated//regulation of RNA metabolic process	GO:0004523//GO:0003697//GO:0046872//GO:0003676	RNA-DNA hybrid ribonuclease activity//single-stranded DNA binding//metal ion binding//nucleic acid binding	--	--	--	--	DOWN	-1.1038	2.463e-12	blast,frame:-2 start:978 end:724|blast,frame:-3 start:1244 end:1059
Cluster-3181.28649-0F	GRAS	GRAS	Cluster-3181.28649	1219091069	XP_021771709.1	2174	2.3e-241	scarecrow-like protein 1 [Chenopodium quinoa]	XM_019252226.1	XM_019252226	935	0	PREDICTED: Beta vulgaris subsp. vulgaris scarecrow-like protein 1 (LOC104905710), partial mRNA	--	--	--	--	Q9SDQ3	1408	5.8e-154	Scarecrow-like protein 1 OS=Arabidopsis thaliana OX=3702 GN=SCL1 PE=2 SV=1	--	--	--	--	--	--	--	--	--	--	UP	1.9588	1.1771e-204	--
Cluster-3181.28915-0R	Trihelix	Trihelix	Cluster-3181.28915	1219159252	XP_021743162.1	918	5.4e-96	uncharacterized protein LOC110709255 [Chenopodium quinoa]	XM_017756475.1	XM_017756475	175	1.54764e-84	PREDICTED: Gossypium arboreum uncharacterized LOC108457420 (LOC108457420), transcript variant X2, mRNA	--	--	--	--	--	--	--	--	PF00277//PF03788	Serum amyloid A protein//LrgA family	--	--	--	--	GO:0016021//GO:0005576	integral component of membrane//extracellular region	--	--	UP	3.1813	0	blast,frame:-1 start:1983 end:319
Cluster-3181.2974-1F	zf-HD	zf-HD	Cluster-3181.2974	731339784	XP_010681042.1	646	1.2e-64	PREDICTED: zinc-finger homeodomain protein 1 [Beta vulgaris subsp. vulgaris]	XM_021869712.1	XM_021869712	116	6.13081e-52	PREDICTED: Chenopodium quinoa zinc-finger homeodomain protein 1-like (LOC110692675), mRNA	--	--	--	--	A2Z259	555	1.6e-55	Zinc-finger homeodomain protein 1 OS=Oryza sativa subsp. indica OX=39946 GN=ZHD1 PE=3 SV=1	PF02184	HAT (Half-A-TPR) repeat	GO:0006396	RNA processing	--	--	--	--	--	--	DOWN	-1.3959	1.3655e-06	blast,frame:2 start:167 end:979
Cluster-3181.29825-2R	MYB-related	MYB->MYB-related	Cluster-3181.29825	1219094526	XP_021773490.1	467	9.3e-44	transcription factor SRM1-like [Chenopodium quinoa]	XM_021874859.1	XM_021874859	174	4.84049e-84	PREDICTED: Chenopodium quinoa transcription factor SRM1-like (LOC110697487), mRNA	--	--	--	--	Q8S9H7	272	1.5e-22	Transcription factor DIVARICATA OS=Antirrhinum majus OX=4151 GN=DIVARICATA PE=2 SV=1	--	--	--	--	--	--	--	--	--	--	UP	1.3637	6.7218e-49	blast,frame:-3 start:638 end:270
Cluster-3181.29828-0R	C2H2	C2H2	Cluster-3181.29828	731322364	XP_010671848.1	1655	4.3e-181	PREDICTED: uncharacterized protein LOC104888530 isoform X1 [Beta vulgaris subsp. vulgaris]	XM_021874370.1	XM_021874370	747	0	PREDICTED: Chenopodium quinoa uncharacterized LOC110697036 (LOC110697036), transcript variant X3, mRNA	--	--	--	--	--	--	--	--	PF06658//PF08642//PF00957//PF00096	Protein of unknown function (DUF1168)//Histone deacetylation protein Rxt3//Synaptobrevin//Zinc finger, C2H2 type	GO:0016575//GO:0016192	histone deacetylation//vesicle-mediated transport	GO:0003676//GO:0003725	nucleic acid binding//double-stranded RNA binding	GO:0016021	integral component of membrane	--	--	UP	1.4114	6.4804e-44	blast,frame:-1 start:4102 end:2510|blast,frame:-2 start:2322 end:2020
Cluster-3181.30243-2F	OFP	OFP	Cluster-3181.30243	731344836	XP_010683620.1	663	1.2e-66	PREDICTED: transcription repressor OFP6 [Beta vulgaris subsp. vulgaris]	XM_022011656.1	XM_022011656	176	2.48923e-85	PREDICTED: Spinacia oleracea transcription repressor OFP6-like (LOC110806020), mRNA	--	--	--	--	Q3EAL1	245	1.3e-19	Transcription repressor OFP6 OS=Arabidopsis thaliana OX=3702 GN=OFP6 PE=1 SV=1	PF12125	D domain of beta-TrCP	--	--	GO:0046983	protein dimerization activity	--	--	--	--	DOWN	-2.0755	1.3186e-11	blast,frame:3 start:93 end:698
Cluster-3181.31115-2R	MYB	MYB->MYB	Cluster-3181.31115	1219053109	XP_021746303.1	1775	4.2e-195	transcription factor MYB124-like [Chenopodium quinoa]	XM_021867248.1	XM_021867248	1192	0	PREDICTED: Chenopodium quinoa transcription factor MYB124-like (LOC110690422), transcript variant X2, mRNA	K09422	MYBP	myb proto-oncogene protein, plant	http://www.genome.jp/dbget-bin/www_bget?ko:K09422	Q94FL6	1019	7.4e-109	Transcription factor MYB124 OS=Arabidopsis thaliana OX=3702 GN=MYB124 PE=1 SV=1	PF01215	Cytochrome c oxidase subunit Vb	GO:0006123	mitochondrial electron transport, cytochrome c to oxygen	GO:0004129	cytochrome-c oxidase activity	GO:0045277//GO:0005740	respiratory chain complex IV//mitochondrial envelope	--	--	DOWN	-1.3205	9.1883e-17	blast,frame:-3 start:2909 end:1512
[truncated: 33 more rows]
