# Supplementary material for: Characterization of the gene expression profile response to drought stress in Haloxylon using PacBio single-molecule real-time and Illumina sequencing
Source: Front Plant Sci. 2022 Aug 16;13:981029. doi: 10.3389/fpls.2022.981029 (PMC9424927; doi:10.3389/fpls.2022.981029)
Supplement: Supplementary file 6 [file Table_6.XLSX]

## Sheet: LS vs. HS
Table S6 DEGs related to ROS in Haloxylon ammodendron
Gene_id	log2FoldChange	pval	padj	{nr}	{SwissProt}	{KEGG}	{KOG}	{GO}	{nt}	{pfam}
transcript_LQ_SAB_transcript19000/f2p0/1557	1.6736	3.172e-22	2.2474e-21	{ADA68879.1; thylakoid Ascorbate peroxidase precursor (chloroplast) [Suaeda salsa]}	{sp|Q42593|APXT_ARATH; L-Ascorbate peroxidase T, chloroplastic OS=Arabidopsis thaliana GN=APXT PE=2 SV=2}	{bvg:104891011; K00434 E1.11.1.11 L-Ascorbate peroxidase 1.11.1.11 ko00053; Metabolism; Carbohydrate metabolism; Ascorbate and aldarate metabolism | ko00480; Metabolism; Metabolism of other amino acids; Glutathione metabolism}	{NA}	{GO:0055114; oxidation-reduction process; biological_process GO:0004601; Peroxidase activity; molecular_function GO:0006979; response to oxidative stress; biological_process GO:0020037; heme binding; molecular_function}	{GU228492.1; Suaeda salsa thylakoid Ascorbate peroxidase precursor, mRNA, complete cds; chloroplast}	{PF00141:Peroxidase}
transcript_HQ_SAB_transcript922/f2p0/4065	-0.76671	0.016145	0.030358	{XP_010687558.1; PREDICTED: respiratory burst oxidase homolog protein E [Beta vulgaris subsp. vulgaris]}	{sp|O81211|RBOHE_ARATH; Respiratory burst oxidase homolog protein E OS=Arabidopsis thaliana GN=RBOHE PE=2 SV=2}	{egr:104436388; K13447 RBOH respiratory burst oxidase [EC:1.6.3.- 1.11.1.-] 1.6.3.-,1.11.1.- ko04016; Environmental Information Processing; Signal transduction; MAPK signaling pathway - plant | ko04626; Organismal Systems; Environmental adaptation; Plant-pathogen interaction}	{At1g19230; KOG0039 Ferric reductase, NADH/NADPH oxidase and related proteins PQ Inorganic ion transport and metabolism ; Secondary metabolites biosynthesis, transport and catabolism ;}	{GO:0055114; oxidation-reduction process; biological_process GO:0005509; calcium ion binding; molecular_function GO:0016491; oxidoreductase activity; molecular_function GO:0050664; oxidoreductase activity, acting on NADH or NADPH, oxygen as acceptor; molecular_function GO:0004601; Peroxidase activity; molecular_function GO:0071988; protein localization to spindle pole body; biological_process GO:…	{XM_010689256.2; PREDICTED: Beta vulgaris subsp. vulgaris respiratory burst oxidase homolog protein E (LOC104901666), mRNA}	{PF13202:EF hand PF08022:FAD-binding domain PF08414:Respiratory burst NADPH oxidase PF17060:Monopolar spindle protein 2 PF00036:EF hand PF13499:EF-hand domain pair PF13405:EF-hand domain PF08030:Ferric reductase NAD binding domain}
transcript_HQ_SAB_transcript3604/f2p0/3163	-2.2126	9.3641e-09	3.4973e-08	{KNA08419.1; hypothetical protein SOVF_162770 [Spinacia oleracea]}	{sp|Q948T9|RBOHB_SOLTU; Respiratory burst oxidase homolog protein B OS=Solanum tuberosum GN=RBOHB PE=1 SV=1}	{bvg:104890306; K13447 RBOH respiratory burst oxidase [EC:1.6.3.- 1.11.1.-] 1.6.3.-,1.11.1.- ko04016; Environmental Information Processing; Signal transduction; MAPK signaling pathway - plant | ko04626; Organismal Systems; Environmental adaptation; Plant-pathogen interaction}	{At5g51060; KOG0039 Ferric reductase, NADH/NADPH oxidase and related proteins PQ Inorganic ion transport and metabolism ; Secondary metabolites biosynthesis, transport and catabolism ;}	{GO:0050664; oxidoreductase activity, acting on NADH or NADPH, oxygen as acceptor; molecular_function GO:0006779; porphyrin biosynthetic process; biological_process GO:0006338; chromatin remodeling; biological_process GO:0004601; Peroxidase activity; molecular_function GO:0016586; RSC complex; cellular_component GO:0055114; oxidation-reduction process; biological_process GO:0005634; nucleus; cell…	{NA}	{PF09510:Rtt102p-like transcription regulator protein PF10414:Sirohaem synthase dimerisation region PF08414:Respiratory burst NADPH oxidase}
transcript_HQ_SAB_transcript30754/f5p0/798	-1.4067	1.7244e-10	7.2431e-10	{XP_010668258.1; PREDICTED: probable Glutathione S-transferase parC [Beta vulgaris subsp. vulgaris]}	{sp|Q03666|GSTX4_TOBAC; Probable Glutathione S-transferase OS=Nicotiana tabacum PE=2 SV=1}	{rcu:8278055; K00799 GST, gst Glutathione S-transferase 2.5.1.18 ko00480; Metabolism; Metabolism of other amino acids; Glutathione metabolism | ko00980; Metabolism; Xenobiotics biodegradation and metabolism; Metabolism of xenobiotics by cytochrome P450 | ko00982; Metabolism; Xenobiotics biodegradation and metabolism; Drug metabolism - cytochrome P450 | ko05204; Human Diseases; Cancers: Overview; …	{At1g17180; KOG0406 Glutathione S-transferase O Posttranslational modification, protein turnover, chaperones ;}	{GO:0015643; toxin binding; molecular_function GO:0005515; protein binding; molecular_function}	{NA}	{PF13409:Glutathione S-transferase, N-terminal domain PF13417:Glutathione S-transferase, N-terminal domain PF01320:Colicin immunity protein / pyocin immunity protein PF02798:Glutathione S-transferase, N-terminal domain}
transcript_HQ_SAB_transcript30033/f3p0/874	-0.57028	6.5406e-07	2.129e-06	{XP_010684235.1; PREDICTED: probable glutathione Peroxidase 5 [Beta vulgaris subsp. vulgaris]}	{sp|Q8L910|GPX4_ARATH; Probable glutathione Peroxidase 4 OS=Arabidopsis thaliana GN=GPX4 PE=2 SV=1}	{rcu:107262367; K00432 gpx glutathione Peroxidase 1.11.1.9 ko00590; Metabolism; Lipid metabolism; Arachidonic acid metabolism | ko00480; Metabolism; Metabolism of other amino acids; Glutathione metabolism | ko04918; Organismal Systems; Endocrine system; Thyroid hormone synthesis}	{At3g63080; KOG1651 Glutathione Peroxidase O Posttranslational modification, protein turnover, chaperones ;}	{GO:0006979; response to oxidative stress; biological_process GO:0016491; oxidoreductase activity; molecular_function GO:0055114; oxidation-reduction process; biological_process GO:0004602; glutathione Peroxidase activity; molecular_function GO:0016209; NA}	{NA}	{PF00255:Glutathione Peroxidase PF08534:Redoxin PF00578:AhpC/TSA family}
transcript_HQ_SAB_transcript29854/f4p0/835	0.90544	8.8502e-65	1.5914e-63	{AFD50704.1; Cu/Zn Superoxide dismutase [Suaeda salsa]}	{sp|P22233|SODC_SPIOL; Superoxide dismutase [Cu-Zn] OS=Spinacia oleracea GN=SODCC PE=2 SV=1}	{bvg:104891015; K04565 SOD1 Superoxide dismutase, Cu-Zn family 1.15.1.1 ko04146; Cellular Processes; Transport and catabolism; Peroxisome | ko04213; Organismal Systems; Aging; Longevity regulating pathway - multiple species | ko05014; Human Diseases; Neurodegenerative diseases; Amyotrophic lateral sclerosis (ALS) | ko05016; Human Diseases; Neurodegenerative diseases; Huntington's disease | ko0502…	{At1g08830; KOG0441 Cu2+/Zn2+ Superoxide dismutase SOD1 P Inorganic ion transport and metabolism ;}	{GO:0055114; oxidation-reduction process; biological_process GO:0046872; metal ion binding; molecular_function GO:0006801; superoxide metabolic process; biological_process}	{XM_010676649.1; PREDICTED: Beta vulgaris subsp. vulgaris Superoxide dismutase [Cu-Zn] (LOC104891015), transcript variant X1, mRNA}	{PF00080:Copper/zinc Superoxide dismutase (SODC)}
transcript_HQ_SAB_transcript29253/f4p0/934	-0.53336	6.1397e-17	3.5814e-16	{AEY76087.1; peroxiredoxin Q [Haloxylon ammodendron]}	{sp|Q6UBI3|PERQ_SUASA; Peroxiredoxin Q, chloroplastic OS=Suaeda salsa GN=PRXQ PE=1 SV=1}	{egr:104436389; K03564 BCP, PRXQ, DOT5 peroxiredoxin Q/BCP 1.11.1.15 -}	{At3g26060; KOG0855 Alkyl hydroperoxide reductase, thiol specific antioxidant and related enzymes O Posttranslational modification, protein turnover, chaperones ;}	{GO:0016209; NA GO:0004602; glutathione Peroxidase activity; molecular_function GO:0055114; oxidation-reduction process; biological_process GO:0006979; response to oxidative stress; biological_process GO:0016491; oxidoreductase activity; molecular_function}	{JN657416.2; Haloxylon ammodendron peroxiredoxin Q (PrXQ) mRNA, complete cds}	{PF00578:AhpC/TSA family PF08534:Redoxin PF00255:Glutathione Peroxidase}
transcript_HQ_SAB_transcript29061/f18p0/946	-1.0288	1.721e-100	4.9947e-99	{XP_010683301.2; PREDICTED: pentatricopeptide repeat-containing protein At1g05670, mitochondrial [Beta vulgaris subsp. vulgaris]}	{sp|Q9FUS8|GSTUH_ARATH; Glutathione S-transferase U17 OS=Arabidopsis thaliana GN=GSTU17 PE=2 SV=1}	{vvi:100245065; K00799 GST, gst Glutathione S-transferase 2.5.1.18 ko00480; Metabolism; Metabolism of other amino acids; Glutathione metabolism | ko00980; Metabolism; Xenobiotics biodegradation and metabolism; Metabolism of xenobiotics by cytochrome P450 | ko00982; Metabolism; Xenobiotics biodegradation and metabolism; Drug metabolism - cytochrome P450 | ko05204; Human Diseases; Cancers: Overview…	{At1g10360; KOG0406 Glutathione S-transferase O Posttranslational modification, protein turnover, chaperones ;}	{GO:0005515; protein binding; molecular_function}	{EF373062.1; Salicornia brachiata Glutathione S-transferase mRNA, complete cds}	{PF13409:Glutathione S-transferase, N-terminal domain PF13417:Glutathione S-transferase, N-terminal domain PF02798:Glutathione S-transferase, N-terminal domain}
transcript_HQ_SAB_transcript29015/f3p0/970	0.4557	1.3543e-13	6.7741e-13	{AFD50704.1; Cu/Zn Superoxide dismutase [Suaeda salsa]}	{sp|P22233|SODC_SPIOL; Superoxide dismutase [Cu-Zn] OS=Spinacia oleracea GN=SODCC PE=2 SV=1}	{bvg:104891015; K04565 SOD1 Superoxide dismutase, Cu-Zn family 1.15.1.1 ko04146; Cellular Processes; Transport and catabolism; Peroxisome | ko04213; Organismal Systems; Aging; Longevity regulating pathway - multiple species | ko05014; Human Diseases; Neurodegenerative diseases; Amyotrophic lateral sclerosis (ALS) | ko05016; Human Diseases; Neurodegenerative diseases; Huntington's disease | ko0502…	{At1g08830; KOG0441 Cu2+/Zn2+ Superoxide dismutase SOD1 P Inorganic ion transport and metabolism ;}	{GO:0046872; metal ion binding; molecular_function GO:0055114; oxidation-reduction process; biological_process GO:0006801; superoxide metabolic process; biological_process}	{XM_010676649.1; PREDICTED: Beta vulgaris subsp. vulgaris Superoxide dismutase [Cu-Zn] (LOC104891015), transcript variant X1, mRNA}	{PF00080:Copper/zinc Superoxide dismutase (SODC)}
transcript_HQ_SAB_transcript28915/f4p0/985	1.4525	3.6034e-18	2.2068e-17	{KNA11546.1; hypothetical protein SOVF_134140 [Spinacia oleracea]}	{sp|Q04522|GSTF_SILVU; Glutathione S-transferase OS=Silene vulgaris GN=GST PE=1 SV=3}	{nnu:104599001; K00799 GST, gst Glutathione S-transferase 2.5.1.18 ko00480; Metabolism; Metabolism of other amino acids; Glutathione metabolism | ko00980; Metabolism; Xenobiotics biodegradation and metabolism; Metabolism of xenobiotics by cytochrome P450 | ko00982; Metabolism; Xenobiotics biodegradation and metabolism; Drug metabolism - cytochrome P450 | ko05204; Human Diseases; Cancers: Overview…	{At2g47730; KOG0867 Glutathione S-transferase O Posttranslational modification, protein turnover, chaperones ;}	{GO:0009055; NA GO:0015035; protein disulfide oxidoreductase activity; molecular_function GO:0005515; protein binding; molecular_function GO:0045454; cell redox homeostasis; biological_process}	{NA}	{PF13409:Glutathione S-transferase, N-terminal domain PF13417:Glutathione S-transferase, N-terminal domain PF00462:Glutaredoxin PF02798:Glutathione S-transferase, N-terminal domain}
transcript_HQ_SAB_transcript28810/f2p0/1002	1.466	1.0267e-06	3.2896e-06	{XP_012086925.1; PREDICTED: Glutathione S-transferase T1-like [Jatropha curcas]}	{sp|Q9ZRT5|GSTT1_ARATH; Glutathione S-transferase T1 OS=Arabidopsis thaliana GN=GSTT1 PE=2 SV=1}	{jcu:105635682; K00799 GST, gst Glutathione S-transferase 2.5.1.18 ko00480; Metabolism; Metabolism of other amino acids; Glutathione metabolism | ko00980; Metabolism; Xenobiotics biodegradation and metabolism; Metabolism of xenobiotics by cytochrome P450 | ko00982; Metabolism; Xenobiotics biodegradation and metabolism; Drug metabolism - cytochrome P450 | ko05204; Human Diseases; Cancers: Overview…	{At5g41210; KOG0867 Glutathione S-transferase O Posttranslational modification, protein turnover, chaperones ;}	{GO:0005515; protein binding; molecular_function}	{XM_012231537.1; PREDICTED: Jatropha curcas Glutathione S-transferase T1-like (LOC105645824), mRNA}	{PF02798:Glutathione S-transferase, N-terminal domain PF13409:Glutathione S-transferase, N-terminal domain PF13417:Glutathione S-transferase, N-terminal domain}
transcript_HQ_SAB_transcript28793/f2p0/983	-1.2285	1.6587e-06	5.2072e-06	{XP_010693136.1; PREDICTED: Glutathione S-transferase DHAR2 [Beta vulgaris subsp. vulgaris]}	{sp|Q9FRL8|DHAR2_ARATH; Glutathione S-transferase DHAR2 OS=Arabidopsis thaliana GN=DHAR2 PE=1 SV=1}	{ath:AT1G75270; - - - - -}	{At1g75270; KOG1422 Intracellular Cl- channel CLIC, contains GST domain P Inorganic ion transport and metabolism ;}	{NA}	{NA}	{NA}
transcript_HQ_SAB_transcript28577/f6p0/999	-0.28147	6.0524e-06	1.7953e-05	{XP_010670824.1; PREDICTED: probable phospholipid hydroperoxide glutathione Peroxidase [Beta vulgaris subsp. vulgaris]}	{sp|P52032|GPX1_ARATH; Phospholipid hydroperoxide glutathione Peroxidase 1, chloroplastic OS=Arabidopsis thaliana GN=GPX1 PE=2 SV=2}	{bvg:104887780; K00432 gpx glutathione Peroxidase 1.11.1.9 ko00590; Metabolism; Lipid metabolism; Arachidonic acid metabolism | ko00480; Metabolism; Metabolism of other amino acids; Glutathione metabolism | ko04918; Organismal Systems; Endocrine system; Thyroid hormone synthesis}	{At2g25080; KOG1651 Glutathione Peroxidase O Posttranslational modification, protein turnover, chaperones ;}	{GO:0004602; glutathione Peroxidase activity; molecular_function GO:0016209; NA GO:0006979; response to oxidative stress; biological_process GO:0016491; oxidoreductase activity; molecular_function GO:0055114; oxidation-reduction process; biological_process}	{XM_007223712.1; Prunus persica hypothetical protein (PRUPE_ppa010584mg) mRNA, complete cds}	{PF00578:AhpC/TSA family PF08534:Redoxin PF00255:Glutathione Peroxidase}
transcript_HQ_SAB_transcript28417/f3p0/1021	0.65531	4.6329e-29	4.0481e-28	{AFD50703.1; manganese Superoxide dismutase [Salicornia europaea]}	{sp|Q9SM64|SODM_PRUPE; Superoxide dismutase [Mn], mitochondrial OS=Prunus persica GN=SOD PE=2 SV=1}	{bvg:104887645; K04564 SOD2 Superoxide dismutase, Fe-Mn family 1.15.1.1 ko04013; Environmental Information Processing; Signal transduction; MAPK signaling pathway - fly | ko04068; Environmental Information Processing; Signal transduction; FoxO signaling pathway | ko04146; Cellular Processes; Transport and catabolism; Peroxisome | ko04211; Organismal Systems; Aging; Longevity regulating pathway | …	{At3g10920; KOG0876 Manganese Superoxide dismutase P Inorganic ion transport and metabolism ;}	{GO:0046872; metal ion binding; molecular_function GO:0006801; superoxide metabolic process; biological_process GO:0055114; oxidation-reduction process; biological_process GO:0004784; Superoxide dismutase activity; molecular_function}	{JQ061158.1; Salicornia europaea manganese Superoxide dismutase (MnSOD) mRNA, complete cds}	{PF00081:Iron/manganese Superoxide dismutases, alpha-hairpin domain PF02777:Iron/manganese Superoxide dismutases, C-terminal domain}
transcript_HQ_SAB_transcript28255/f11p0/1028	1.4164	1.6104e-254	1.3831e-252	{KNA11546.1; hypothetical protein SOVF_134140 [Spinacia oleracea]}	{sp|Q04522|GSTF_SILVU; Glutathione S-transferase OS=Silene vulgaris GN=GST PE=1 SV=3}	{nnu:104599001; K00799 GST, gst Glutathione S-transferase 2.5.1.18 ko00480; Metabolism; Metabolism of other amino acids; Glutathione metabolism | ko00980; Metabolism; Xenobiotics biodegradation and metabolism; Metabolism of xenobiotics by cytochrome P450 | ko00982; Metabolism; Xenobiotics biodegradation and metabolism; Drug metabolism - cytochrome P450 | ko05204; Human Diseases; Cancers: Overview…	{At2g47730; KOG0867 Glutathione S-transferase O Posttranslational modification, protein turnover, chaperones ;}	{GO:0005515; protein binding; molecular_function}	{XM_010667483.2; PREDICTED: Beta vulgaris subsp. vulgaris Glutathione S-transferase (LOC104883042), mRNA}	{PF13409:Glutathione S-transferase, N-terminal domain PF13417:Glutathione S-transferase, N-terminal domain PF02798:Glutathione S-transferase, N-terminal domain}
transcript_HQ_SAB_transcript28239/f13p0/975	0.15455	0.0098763	0.019366	{XP_012086927.1; PREDICTED: Glutathione S-transferase T1-like [Jatropha curcas]}	{sp|Q9ZRT5|GSTT1_ARATH; Glutathione S-transferase T1 OS=Arabidopsis thaliana GN=GSTT1 PE=2 SV=1}	{jcu:105635682; K00799 GST, gst Glutathione S-transferase 2.5.1.18 ko00480; Metabolism; Metabolism of other amino acids; Glutathione metabolism | ko00980; Metabolism; Xenobiotics biodegradation and metabolism; Metabolism of xenobiotics by cytochrome P450 | ko00982; Metabolism; Xenobiotics biodegradation and metabolism; Drug metabolism - cytochrome P450 | ko05204; Human Diseases; Cancers: Overview…	{At5g41210; KOG0867 Glutathione S-transferase O Posttranslational modification, protein turnover, chaperones ;}	{GO:0005515; protein binding; molecular_function}	{NA}	{PF02798:Glutathione S-transferase, N-terminal domain PF13417:Glutathione S-transferase, N-terminal domain PF13409:Glutathione S-transferase, N-terminal domain}
transcript_HQ_SAB_transcript28195/f17p0/985	-0.21757	8.527e-08	2.9867e-07	{BAJ33626.1; unnamed protein product [Eutrema halophilum]}	{sp|O48646|GPX6_ARATH; Probable phospholipid hydroperoxide glutathione Peroxidase 6, mitochondrial OS=Arabidopsis thaliana GN=GPX6 PE=2 SV=2}	{eus:EUTSA_v10028932mg; K00432 gpx glutathione Peroxidase 1.11.1.9 ko00590; Metabolism; Lipid metabolism; Arachidonic acid metabolism | ko00480; Metabolism; Metabolism of other amino acids; Glutathione metabolism | ko04918; Organismal Systems; Endocrine system; Thyroid hormone synthesis}	{At4g11600; KOG1651 Glutathione Peroxidase O Posttranslational modification, protein turnover, chaperones ;}	{GO:0055114; oxidation-reduction process; biological_process GO:0006979; response to oxidative stress; biological_process GO:0016491; oxidoreductase activity; molecular_function GO:0016209; NA GO:0004602; glutathione Peroxidase activity; molecular_function}	{XM_010696872.2; PREDICTED: Beta vulgaris subsp. vulgaris probable phospholipid hydroperoxide glutathione Peroxidase (LOC104907858), mRNA}	{PF00578:AhpC/TSA family PF08534:Redoxin PF00255:Glutathione Peroxidase}
transcript_HQ_SAB_transcript28144/f12p0/1016	0.56259	5.8331e-12	2.6647e-11	{XP_015951758.1; PREDICTED: Superoxide dismutase [Cu-Zn], chloroplastic [Arachis duranensis]}	{sp|P14831|SODCP_SOLLC; Superoxide dismutase [Cu-Zn], chloroplastic OS=Solanum lycopersicum GN=SODCP.2 PE=1 SV=1}	{adu:107476456; K04565 SOD1 Superoxide dismutase, Cu-Zn family 1.15.1.1 ko04146; Cellular Processes; Transport and catabolism; Peroxisome | ko04213; Organismal Systems; Aging; Longevity regulating pathway - multiple species | ko05014; Human Diseases; Neurodegenerative diseases; Amyotrophic lateral sclerosis (ALS) | ko05016; Human Diseases; Neurodegenerative diseases; Huntington's disease | ko0502…	{At2g28190; KOG0441 Cu2+/Zn2+ Superoxide dismutase SOD1 P Inorganic ion transport and metabolism ;}	{GO:0046872; metal ion binding; molecular_function GO:0006801; superoxide metabolic process; biological_process GO:0055114; oxidation-reduction process; biological_process}	{JQ061160.1; Salicornia europaea Cu/Zn Superoxide dismutase (Cu/ZnSOD) mRNA, complete cds}	{PF00080:Copper/zinc Superoxide dismutase (SODC)}
transcript_HQ_SAB_transcript28053/f8p0/1011	0.13815	0.00010903	0.0002826	{KNA11546.1; hypothetical protein SOVF_134140 [Spinacia oleracea]}	{sp|Q04522|GSTF_SILVU; Glutathione S-transferase OS=Silene vulgaris GN=GST PE=1 SV=3}	{nnu:104599001; K00799 GST, gst Glutathione S-transferase 2.5.1.18 ko00480; Metabolism; Metabolism of other amino acids; Glutathione metabolism | ko00980; Metabolism; Xenobiotics biodegradation and metabolism; Metabolism of xenobiotics by cytochrome P450 | ko00982; Metabolism; Xenobiotics biodegradation and metabolism; Drug metabolism - cytochrome P450 | ko05204; Human Diseases; Cancers: Overview…	{At2g47730; KOG0867 Glutathione S-transferase O Posttranslational modification, protein turnover, chaperones ;}	{GO:0015035; protein disulfide oxidoreductase activity; molecular_function GO:0009055; NA GO:0005515; protein binding; molecular_function GO:0045454; cell redox homeostasis; biological_process}	{XM_010668750.2; PREDICTED: Beta vulgaris subsp. vulgaris Glutathione S-transferase (LOC104884153), mRNA}	{PF13409:Glutathione S-transferase, N-terminal domain PF13417:Glutathione S-transferase, N-terminal domain PF02798:Glutathione S-transferase, N-terminal domain PF00462:Glutaredoxin}
transcript_HQ_SAB_transcript28008/f8p0/1047	-1.6617	0	0	{XP_010694823.1; PREDICTED: probable Glutathione S-transferase [Beta vulgaris subsp. vulgaris]}	{sp|Q03666|GSTX4_TOBAC; Probable Glutathione S-transferase OS=Nicotiana tabacum PE=2 SV=1}	{fve:101308356; K00799 GST, gst Glutathione S-transferase 2.5.1.18 ko00480; Metabolism; Metabolism of other amino acids; Glutathione metabolism | ko00980; Metabolism; Xenobiotics biodegradation and metabolism; Metabolism of xenobiotics by cytochrome P450 | ko00982; Metabolism; Xenobiotics biodegradation and metabolism; Drug metabolism - cytochrome P450 | ko05204; Human Diseases; Cancers: Overview…	{At1g78380; KOG0406 Glutathione S-transferase O Posttranslational modification, protein turnover, chaperones ;}	{GO:0005515; protein binding; molecular_function}	{NA}	{PF02798:Glutathione S-transferase, N-terminal domain PF13417:Glutathione S-transferase, N-terminal domain PF13409:Glutathione S-transferase, N-terminal domain}
transcript_HQ_SAB_transcript27766/f4p0/1076	-0.51233	4.6673e-07	1.5396e-06	{KNA11546.1; hypothetical protein SOVF_134140 [Spinacia oleracea]}	{sp|P46423|GSTF_HYOMU; Glutathione S-transferase OS=Hyoscyamus muticus PE=1 SV=1}	{pper:PRUPE_ppa011383mg; K00799 GST, gst Glutathione S-transferase 2.5.1.18 ko00480; Metabolism; Metabolism of other amino acids; Glutathione metabolism | ko00980; Metabolism; Xenobiotics biodegradation and metabolism; Metabolism of xenobiotics by cytochrome P450 | ko00982; Metabolism; Xenobiotics biodegradation and metabolism; Drug metabolism - cytochrome P450 | ko05204; Human Diseases; Cancers:…	{At2g47730; KOG0867 Glutathione S-transferase O Posttranslational modification, protein turnover, chaperones ;}	{GO:0005515; protein binding; molecular_function}	{NA}	{PF02798:Glutathione S-transferase, N-terminal domain PF13409:Glutathione S-transferase, N-terminal domain PF13417:Glutathione S-transferase, N-terminal domain}
transcript_HQ_SAB_transcript27612/f2p0/1103	-0.22663	0.013646	0.026008	{XP_010670140.1; PREDICTED: Glutathione S-transferase DHAR3, chloroplastic [Beta vulgaris subsp. vulgaris]}	{sp|Q8LE52|DHAR3_ARATH; Glutathione S-transferase DHAR3, chloroplastic OS=Arabidopsis thaliana GN=DHAR3 PE=1 SV=1}	{bvg:104887241; - - - - -}	{At5g16710_1; KOG1422 Intracellular Cl- channel CLIC, contains GST domain P Inorganic ion transport and metabolism ;}	{GO:0006626; protein targeting to mitochondrion; biological_process GO:0005515; protein binding; molecular_function GO:0009055; NA GO:0015035; protein disulfide oxidoreductase activity; molecular_function GO:0045454; cell redox homeostasis; biological_process GO:0005741; mitochondrial outer membrane; cellular_component}	{AF195783.1; Spinacia oleracea dehydroascorbate reductase mRNA, complete cds; nuclear gene for chloroplast product}	{PF10568:Outer mitochondrial membrane transport complex protein PF13417:Glutathione S-transferase, N-terminal domain PF13409:Glutathione S-transferase, N-terminal domain PF02798:Glutathione S-transferase, N-terminal domain PF00462:Glutaredoxin}
transcript_HQ_SAB_transcript27532/f2p0/1100	0.973	1.7982e-30	1.6334e-29	{XP_010695664.1; PREDICTED: Peroxidase P7 [Beta vulgaris subsp. vulgaris]}	{sp|Q9FLC0|PER52_ARATH; Peroxidase 52 OS=Arabidopsis thaliana GN=PER52 PE=2 SV=1}	{bvg:104908267; K00430 E1.11.1.7 Peroxidase 1.11.1.7 ko00940; Metabolism; Biosynthesis of other secondary metabolites; Phenylpropanoid biosynthesis}	{NA}	{GO:0006979; response to oxidative stress; biological_process GO:0004601; Peroxidase activity; molecular_function GO:0055114; oxidation-reduction process; biological_process GO:0020037; heme binding; molecular_function}	{XM_010697362.2; PREDICTED: Beta vulgaris subsp. vulgaris Peroxidase P7 (LOC104908267), mRNA}	{PF00141:Peroxidase}
transcript_HQ_SAB_transcript27464/f4p0/1091	-0.52707	4.0479e-21	2.7705e-20	{XP_010694944.1; PREDICTED: probable Glutathione S-transferase parC [Beta vulgaris subsp. vulgaris]}	{sp|P49332|GSTXC_TOBAC; Probable Glutathione S-transferase parC OS=Nicotiana tabacum GN=PARC PE=2 SV=1}	{mdm:103445382; K00799 GST, gst Glutathione S-transferase 2.5.1.18 ko00480; Metabolism; Metabolism of other amino acids; Glutathione metabolism | ko00980; Metabolism; Xenobiotics biodegradation and metabolism; Metabolism of xenobiotics by cytochrome P450 | ko00982; Metabolism; Xenobiotics biodegradation and metabolism; Drug metabolism - cytochrome P450 | ko05204; Human Diseases; Cancers: Overview…	{At1g17180; KOG0406 Glutathione S-transferase O Posttranslational modification, protein turnover, chaperones ;}	{GO:0006626; protein targeting to mitochondrion; biological_process GO:0005515; protein binding; molecular_function GO:0005741; mitochondrial outer membrane; cellular_component}	{XM_015225297.1; PREDICTED: Solanum pennellii probable Glutathione S-transferase (LOC107024338), mRNA}	{PF10568:Outer mitochondrial membrane transport complex protein PF02798:Glutathione S-transferase, N-terminal domain PF13409:Glutathione S-transferase, N-terminal domain PF13417:Glutathione S-transferase, N-terminal domain}
transcript_HQ_SAB_transcript27374/f2p0/1106	-0.24407	0.00074064	0.0017297	{KNA16848.1; hypothetical protein SOVF_085240 [Spinacia oleracea]}	{sp|P57108|GSTZ_EUPES; Glutathione S-transferase zeta class OS=Euphorbia esula PE=2 SV=1}	{nnu:104593872; K01800 maiA, GSTZ1 maleylacetoacetate isomerase 5.2.1.2 ko00350; Metabolism; Amino acid metabolism; Tyrosine metabolism | ko00643; Metabolism; Xenobiotics biodegradation and metabolism; Styrene degradation}	{At2g02390; KOG0868 Glutathione S-transferase O Posttranslational modification, protein turnover, chaperones ;}	{GO:0005515; protein binding; molecular_function}	{XM_010683882.1; PREDICTED: Beta vulgaris subsp. vulgaris Glutathione S-transferase 2-like (LOC104897074), mRNA}	{PF13417:Glutathione S-transferase, N-terminal domain PF13409:Glutathione S-transferase, N-terminal domain PF02798:Glutathione S-transferase, N-terminal domain}
transcript_HQ_SAB_transcript2733/f3p0/3380	0.32934	3.0836e-05	8.5397e-05	{KNA08419.1; hypothetical protein SOVF_162770 [Spinacia oleracea]}	{sp|Q948T9|RBOHB_SOLTU; Respiratory burst oxidase homolog protein B OS=Solanum tuberosum GN=RBOHB PE=1 SV=1}	{bvg:104890306; K13447 RBOH respiratory burst oxidase [EC:1.6.3.- 1.11.1.-] 1.6.3.-,1.11.1.- ko04016; Environmental Information Processing; Signal transduction; MAPK signaling pathway - plant | ko04626; Organismal Systems; Environmental adaptation; Plant-pathogen interaction}	{At5g47910; KOG0039 Ferric reductase, NADH/NADPH oxidase and related proteins PQ Inorganic ion transport and metabolism ; Secondary metabolites biosynthesis, transport and catabolism ;}	{GO:0006338; chromatin remodeling; biological_process GO:0005509; calcium ion binding; molecular_function GO:0006779; porphyrin biosynthetic process; biological_process GO:0035307; positive regulation of protein dephosphorylation; biological_process GO:0050664; oxidoreductase activity, acting on NADH or NADPH, oxygen as acceptor; molecular_function GO:0016514; SWI/SNF complex; cellular_component …	{XM_010675737.2; PREDICTED: Beta vulgaris subsp. vulgaris respiratory burst oxidase homolog protein B (LOC104890306), mRNA}	{PF08414:Respiratory burst NADPH oxidase PF13202:EF hand PF10414:Sirohaem synthase dimerisation region PF13405:EF-hand domain PF13499:EF-hand domain pair PF09510:Rtt102p-like transcription regulator protein PF00036:EF hand PF09771:Transmembrane protein 188}
transcript_HQ_SAB_transcript27305/f2p0/1120	-0.43213	4.7252e-14	2.4156e-13	{XP_010693136.1; PREDICTED: Glutathione S-transferase DHAR2 [Beta vulgaris subsp. vulgaris]}	{sp|Q9FRL8|DHAR2_ARATH; Glutathione S-transferase DHAR2 OS=Arabidopsis thaliana GN=DHAR2 PE=1 SV=1}	{nta:107777254; - - - - -}	{At1g75270; KOG1422 Intracellular Cl- channel CLIC, contains GST domain P Inorganic ion transport and metabolism ;}	{GO:0005515; protein binding; molecular_function GO:0006626; protein targeting to mitochondrion; biological_process GO:0015035; protein disulfide oxidoreductase activity; molecular_function GO:0009055; NA GO:0045454; cell redox homeostasis; biological_process GO:0005741; mitochondrial outer membrane; cellular_component}	{XM_010694834.2; PREDICTED: Beta vulgaris subsp. vulgaris Glutathione S-transferase DHAR2 (LOC104906117), mRNA}	{PF10568:Outer mitochondrial membrane transport complex protein PF00462:Glutaredoxin PF02798:Glutathione S-transferase, N-terminal domain PF13417:Glutathione S-transferase, N-terminal domain PF13409:Glutathione S-transferase, N-terminal domain}
transcript_HQ_SAB_transcript27257/f2p0/1126	-0.75854	1.2112e-18	7.5601e-18	{XP_010687114.1; PREDICTED: protein LSD1 isoform X2 [Beta vulgaris subsp. vulgaris]}	{sp|P94077|LSD1_ARATH; Protein LSD1 OS=Arabidopsis thaliana GN=LSD1 PE=1 SV=1}	{jcu:105636810; - - - - -}	{NA}	{GO:0006351; transcription, DNA-dependent; biological_process GO:0016491; oxidoreductase activity; molecular_function GO:0055114; oxidation-reduction process; biological_process}	{XM_010688814.2; PREDICTED: Beta vulgaris subsp. vulgaris protein LSD1 (LOC104901262), transcript variant X4, mRNA}	{PF03150:Di-haem cytochrome c Peroxidase PF02150:RNA polymerases M/15 Kd subunit}
transcript_HQ_SAB_transcript27140/f8p0/1127	1.1574	0.00046073	0.001103	{KNA18297.1; hypothetical protein SOVF_072200 [Spinacia oleracea]}	{sp|Q42564|APX3_ARATH; L-Ascorbate peroxidase 3, peroxisomal OS=Arabidopsis thaliana GN=APX3 PE=1 SV=1}	{cann:107859857; - - - - -}	{NA}	{GO:0020037; heme binding; molecular_function GO:0055114; oxidation-reduction process; biological_process GO:0006979; response to oxidative stress; biological_process GO:0004601; Peroxidase activity; molecular_function}	{XM_010681598.2; PREDICTED: Beta vulgaris subsp. vulgaris L-Ascorbate peroxidase 3, peroxisomal (LOC104895166), mRNA}	{PF00141:Peroxidase}
transcript_HQ_SAB_transcript27036/f4p0/1137	-0.31444	0.0030491	0.0065158	{KNA18404.1; hypothetical protein SOVF_070820 [Spinacia oleracea]}	{sp|Q7XZP5|APX5_ARATH; L-Ascorbate peroxidase 5, peroxisomal OS=Arabidopsis thaliana GN=APX5 PE=1 SV=2}	{thj:104804273; K00434 E1.11.1.11 L-Ascorbate peroxidase 1.11.1.11 ko00053; Metabolism; Carbohydrate metabolism; Ascorbate and aldarate metabolism | ko00480; Metabolism; Metabolism of other amino acids; Glutathione metabolism}	{NA}	{GO:0004601; Peroxidase activity; molecular_function GO:0006979; response to oxidative stress; biological_process GO:0055114; oxidation-reduction process; biological_process GO:0020037; heme binding; molecular_function}	{D49679.1; Spinacia oleracea mRNA for Ascorbate peroxidase, complete cds}	{PF00141:Peroxidase}
transcript_HQ_SAB_transcript26533/f3p0/1178	0.46047	0.00011809	0.00030468	{KNA15210.1; hypothetical protein SOVF_100390, partial [Spinacia oleracea]}	{sp|Q8H8U5|IN21B_ORYSJ; Protein IN2-1 homolog B OS=Oryza sativa subsp. japonica GN=GSTZ5 PE=2 SV=1}	{nnu:104599214; K00799 GST, gst Glutathione S-transferase 2.5.1.18 ko00480; Metabolism; Metabolism of other amino acids; Glutathione metabolism | ko00980; Metabolism; Xenobiotics biodegradation and metabolism; Metabolism of xenobiotics by cytochrome P450 | ko00982; Metabolism; Xenobiotics biodegradation and metabolism; Drug metabolism - cytochrome P450 | ko05204; Human Diseases; Cancers: Overview…	{At5g02790; KOG0406 Glutathione S-transferase O Posttranslational modification, protein turnover, chaperones ;}	{GO:0005515; protein binding; molecular_function}	{XM_010693580.2; PREDICTED: Beta vulgaris subsp. vulgaris protein IN2-1 homolog B (LOC104905130), mRNA}	{PF13409:Glutathione S-transferase, N-terminal domain PF13417:Glutathione S-transferase, N-terminal domain PF02798:Glutathione S-transferase, N-terminal domain}
transcript_HQ_SAB_transcript26440/f13p0/1156	0.56064	5.1586e-09	1.9627e-08	{KNA18404.1; hypothetical protein SOVF_070820 [Spinacia oleracea]}	{sp|Q7XZP5|APX5_ARATH; L-Ascorbate peroxidase 5, peroxisomal OS=Arabidopsis thaliana GN=APX5 PE=1 SV=2}	{eus:EUTSA_v10025942mg; K00434 E1.11.1.11 L-Ascorbate peroxidase 1.11.1.11 ko00053; Metabolism; Carbohydrate metabolism; Ascorbate and aldarate metabolism | ko00480; Metabolism; Metabolism of other amino acids; Glutathione metabolism}	{NA}	{GO:0020037; heme binding; molecular_function GO:0004601; Peroxidase activity; molecular_function GO:0006979; response to oxidative stress; biological_process GO:0055114; oxidation-reduction process; biological_process}	{XM_019250091.1; PREDICTED: Beta vulgaris subsp. vulgaris L-Ascorbate peroxidase 5, peroxisomal-like (LOC104895169), mRNA}	{PF00141:Peroxidase}
transcript_HQ_SAB_transcript26375/f9p0/1152	-1.1133	1.7958e-93	4.7905e-92	{KNA15210.1; hypothetical protein SOVF_100390, partial [Spinacia oleracea]}	{sp|Q8H8U5|IN21B_ORYSJ; Protein IN2-1 homolog B OS=Oryza sativa subsp. japonica GN=GSTZ5 PE=2 SV=1}	{nnu:104599214; K00799 GST, gst Glutathione S-transferase 2.5.1.18 ko00480; Metabolism; Metabolism of other amino acids; Glutathione metabolism | ko00980; Metabolism; Xenobiotics biodegradation and metabolism; Metabolism of xenobiotics by cytochrome P450 | ko00982; Metabolism; Xenobiotics biodegradation and metabolism; Drug metabolism - cytochrome P450 | ko05204; Human Diseases; Cancers: Overview…	{At5g02790; KOG0406 Glutathione S-transferase O Posttranslational modification, protein turnover, chaperones ;}	{GO:0005515; protein binding; molecular_function}	{XM_010693580.2; PREDICTED: Beta vulgaris subsp. vulgaris protein IN2-1 homolog B (LOC104905130), mRNA}	{PF02798:Glutathione S-transferase, N-terminal domain PF13417:Glutathione S-transferase, N-terminal domain PF13409:Glutathione S-transferase, N-terminal domain}
transcript_HQ_SAB_transcript25966/f10p0/1192	0.79765	5.5882e-12	2.5556e-11	{KNA03205.1; hypothetical protein SOVF_211420 [Spinacia oleracea]}	{sp|Q9FL16|PER63_ARATH; Peroxidase 63 OS=Arabidopsis thaliana GN=PER63 PE=2 SV=1}	{bvg:104887004; K00430 E1.11.1.7 Peroxidase 1.11.1.7 ko00940; Metabolism; Biosynthesis of other secondary metabolites; Phenylpropanoid biosynthesis}	{NA}	{GO:0055114; oxidation-reduction process; biological_process GO:0004601; Peroxidase activity; molecular_function GO:0006979; response to oxidative stress; biological_process GO:0020037; heme binding; molecular_function}	{XM_010671582.2; PREDICTED: Beta vulgaris subsp. vulgaris Peroxidase 63 (LOC104887004), mRNA}	{PF00141:Peroxidase}
transcript_HQ_SAB_transcript25753/f3p0/1233	2.1581	0.010949	0.021285	{XP_010669735.1; PREDICTED: Glutathione S-transferase L3 isoform X2 [Beta vulgaris subsp. vulgaris]}	{sp|Q8H8U5|IN21B_ORYSJ; Protein IN2-1 homolog B OS=Oryza sativa subsp. japonica GN=GSTZ5 PE=2 SV=1}	{bvg:104886900; K00799 GST, gst Glutathione S-transferase 2.5.1.18 ko00480; Metabolism; Metabolism of other amino acids; Glutathione metabolism | ko00980; Metabolism; Xenobiotics biodegradation and metabolism; Metabolism of xenobiotics by cytochrome P450 | ko00982; Metabolism; Xenobiotics biodegradation and metabolism; Drug metabolism - cytochrome P450 | ko05204; Human Diseases; Cancers: Overview…	{At3g55040; KOG0406 Glutathione S-transferase O Posttranslational modification, protein turnover, chaperones ;}	{GO:0005515; protein binding; molecular_function}	{XM_010671433.2; PREDICTED: Beta vulgaris subsp. vulgaris Glutathione S-transferase L3 (LOC104886900), transcript variant X2, mRNA}	{PF13409:Glutathione S-transferase, N-terminal domain PF13417:Glutathione S-transferase, N-terminal domain PF02798:Glutathione S-transferase, N-terminal domain}
transcript_HQ_SAB_transcript25619/f3p0/1249	2.6673	4.4825e-05	0.00012157	{ADA68879.1; thylakoid Ascorbate peroxidase precursor (chloroplast) [Suaeda salsa]}	{sp|Q42592|APXS_ARATH; L-Ascorbate peroxidase S, chloroplastic/mitochondrial OS=Arabidopsis thaliana GN=APXS PE=1 SV=2}	{bvg:104891011; K00434 E1.11.1.11 L-Ascorbate peroxidase 1.11.1.11 ko00053; Metabolism; Carbohydrate metabolism; Ascorbate and aldarate metabolism | ko00480; Metabolism; Metabolism of other amino acids; Glutathione metabolism}	{NA}	{GO:0020037; heme binding; molecular_function GO:0055114; oxidation-reduction process; biological_process GO:0004601; Peroxidase activity; molecular_function GO:0006979; response to oxidative stress; biological_process}	{GU228492.1; Suaeda salsa thylakoid Ascorbate peroxidase precursor, mRNA, complete cds; chloroplast}	{PF00141:Peroxidase}
transcript_HQ_SAB_transcript24858/f7p0/1299	0.49642	1.2501e-08	4.6287e-08	{KNA09584.1; hypothetical protein SOVF_152320 [Spinacia oleracea]}	{sp|A7NY33|PER4_VITVI; Peroxidase 4 OS=Vitis vinifera GN=GSVIVT00023967001 PE=1 SV=1}	{bvg:104908331; K00430 E1.11.1.7 Peroxidase 1.11.1.7 ko00940; Metabolism; Biosynthesis of other secondary metabolites; Phenylpropanoid biosynthesis}	{NA}	{GO:0020037; heme binding; molecular_function GO:0055114; oxidation-reduction process; biological_process GO:0006979; response to oxidative stress; biological_process GO:0004601; Peroxidase activity; molecular_function}	{XM_010697429.2; PREDICTED: Beta vulgaris subsp. vulgaris Peroxidase P7 (LOC104908331), mRNA}	{PF00141:Peroxidase}
transcript_HQ_SAB_transcript24844/f2p0/1308	2.2328	1.4098e-10	5.9525e-10	{XP_010681313.1; PREDICTED: Peroxidase 11 [Beta vulgaris subsp. vulgaris]}	{sp|Q96519|PER11_ARATH; Peroxidase 11 OS=Arabidopsis thaliana GN=PER11 PE=1 SV=1}	{vvi:100261517; K00430 E1.11.1.7 Peroxidase 1.11.1.7 ko00940; Metabolism; Biosynthesis of other secondary metabolites; Phenylpropanoid biosynthesis}	{NA}	{GO:0055114; oxidation-reduction process; biological_process GO:0006979; response to oxidative stress; biological_process GO:0004601; Peroxidase activity; molecular_function GO:0020037; heme binding; molecular_function}	{XM_010683011.2; PREDICTED: Beta vulgaris subsp. vulgaris Peroxidase 11 (LOC104896291), mRNA}	{PF00141:Peroxidase}
transcript_HQ_SAB_transcript24740/f3p0/1308	1.6409	7.5673e-75	1.5659e-73	{XP_010679795.1; PREDICTED: Peroxidase 72 [Beta vulgaris subsp. vulgaris]}	{sp|Q9FJZ9|PER72_ARATH; Peroxidase 72 OS=Arabidopsis thaliana GN=PER72 PE=1 SV=1}	{cic:CICLE_v10026054mg; K00430 E1.11.1.7 Peroxidase 1.11.1.7 ko00940; Metabolism; Biosynthesis of other secondary metabolites; Phenylpropanoid biosynthesis}	{NA}	{GO:0004601; Peroxidase activity; molecular_function GO:0006979; response to oxidative stress; biological_process GO:0055114; oxidation-reduction process; biological_process GO:0020037; heme binding; molecular_function}	{XM_010681493.2; PREDICTED: Beta vulgaris subsp. vulgaris Peroxidase 72 (LOC104895083), mRNA}	{PF00141:Peroxidase}
transcript_HQ_SAB_transcript24636/f3p0/1310	-1.4188	2.2762e-200	1.4062e-198	{XP_010693136.1; PREDICTED: Glutathione S-transferase DHAR2 [Beta vulgaris subsp. vulgaris]}	{sp|Q9FRL8|DHAR2_ARATH; Glutathione S-transferase DHAR2 OS=Arabidopsis thaliana GN=DHAR2 PE=1 SV=1}	{nta:107777254; - - - - -}	{At1g75270; KOG1422 Intracellular Cl- channel CLIC, contains GST domain P Inorganic ion transport and metabolism ;}	{GO:0005515; protein binding; molecular_function GO:0006626; protein targeting to mitochondrion; biological_process GO:0009055; NA GO:0015035; protein disulfide oxidoreductase activity; molecular_function GO:0045454; cell redox homeostasis; biological_process GO:0005741; mitochondrial outer membrane; cellular_component}	{XM_010694834.2; PREDICTED: Beta vulgaris subsp. vulgaris Glutathione S-transferase DHAR2 (LOC104906117), mRNA}	{PF10568:Outer mitochondrial membrane transport complex protein PF02798:Glutathione S-transferase, N-terminal domain PF00462:Glutaredoxin PF13409:Glutathione S-transferase, N-terminal domain PF13417:Glutathione S-transferase, N-terminal domain}
transcript_HQ_SAB_transcript24194/f12p0/1338	0.61968	7.1997e-06	2.1227e-05	{KNA09548.1; hypothetical protein SOVF_152660 [Spinacia oleracea]}	{sp|Q43872|PER64_ARATH; Peroxidase 64 OS=Arabidopsis thaliana GN=PER64 PE=1 SV=1}	{rcu:8268089; K00430 E1.11.1.7 Peroxidase 1.11.1.7 ko00940; Metabolism; Biosynthesis of other secondary metabolites; Phenylpropanoid biosynthesis}	{NA}	{GO:0020037; heme binding; molecular_function GO:0006979; response to oxidative stress; biological_process GO:0004601; Peroxidase activity; molecular_function GO:0055114; oxidation-reduction process; biological_process}	{XM_010682099.2; PREDICTED: Beta vulgaris subsp. vulgaris Peroxidase 64 (LOC104895554), transcript variant X2, mRNA}	{PF00141:Peroxidase}
transcript_HQ_SAB_transcript24152/f2p0/1368	2.1692	2.3939e-35	2.4685e-34	{XP_010696607.1; PREDICTED: Peroxidase 3 [Beta vulgaris subsp. vulgaris]}	{sp|O23044|PER3_ARATH; Peroxidase 3 OS=Arabidopsis thaliana GN=PER3 PE=2 SV=1}	{nta:107778977; - - - - -}	{NA}	{GO:0055114; oxidation-reduction process; biological_process GO:0004601; Peroxidase activity; molecular_function GO:0006979; response to oxidative stress; biological_process GO:0020037; heme binding; molecular_function}	{XM_010698305.2; PREDICTED: Beta vulgaris subsp. vulgaris Peroxidase 3 (LOC104909106), mRNA}	{PF00141:Peroxidase}
transcript_HQ_SAB_transcript24090/f2p0/1355	-0.65313	1.155e-18	7.2154e-18	{XP_010679902.1; PREDICTED: L-Ascorbate peroxidase 3, peroxisomal [Beta vulgaris subsp. vulgaris]}	{sp|Q42564|APX3_ARATH; L-Ascorbate peroxidase 3, peroxisomal OS=Arabidopsis thaliana GN=APX3 PE=1 SV=1}	{vra:106756337; K00434 E1.11.1.11 L-Ascorbate peroxidase 1.11.1.11 ko00053; Metabolism; Carbohydrate metabolism; Ascorbate and aldarate metabolism | ko00480; Metabolism; Metabolism of other amino acids; Glutathione metabolism}	{NA}	{GO:0020037; heme binding; molecular_function GO:0055114; oxidation-reduction process; biological_process GO:0004601; Peroxidase activity; molecular_function GO:0006979; response to oxidative stress; biological_process}	{XM_010681600.2; PREDICTED: Beta vulgaris subsp. vulgaris L-Ascorbate peroxidase 3, peroxisomal (LOC104895170), mRNA}	{PF00141:Peroxidase}
transcript_HQ_SAB_transcript23807/f2p0/1392	0.85589	2.6219e-08	9.5131e-08	{XP_010676616.1; PREDICTED: copper chaperone for Superoxide dismutase, chloroplastic/cytosolic [Beta vulgaris subsp. vulgaris]}	{sp|Q9LD47|CCS_ARATH; Copper chaperone for Superoxide dismutase, chloroplastic/cytosolic OS=Arabidopsis thaliana GN=CCS PE=1 SV=1}	{bvg:104892389; K04569 CCS copper chaperone for Superoxide dismutase - ko05014; Human Diseases; Neurodegenerative diseases; Amyotrophic lateral sclerosis (ALS)}	{At1g12520; KOG4656 Copper chaperone for Superoxide dismutase P Inorganic ion transport and metabolism ;}	{GO:0046872; metal ion binding; molecular_function GO:0006801; superoxide metabolic process; biological_process GO:0055114; oxidation-reduction process; biological_process GO:0030001; metal ion transport; biological_process}	{XM_010678314.2; PREDICTED: Beta vulgaris subsp. vulgaris copper chaperone for Superoxide dismutase, chloroplastic/cytosolic (LOC104892389), mRNA}	{PF00403:Heavy-metal-associated domain PF00080:Copper/zinc Superoxide dismutase (SODC)}
transcript_HQ_SAB_transcript23685/f2p0/1425	0.48477	0.0072767	0.014634	{XP_010687743.1; PREDICTED: uncharacterized protein LOC104901818 isoform X1 [Beta vulgaris subsp. vulgaris]}	{sp|P42620|YQJG_ECOLI; Glutathionyl-hydroquinone reductase YqjG OS=Escherichia coli (strain K12) GN=yqjG PE=1 SV=1}	{vvi:100268002; K07393 ECM4 putative Glutathione S-transferase - -}	{At5g45020; KOG2903 Predicted Glutathione S-transferase O Posttranslational modification, protein turnover, chaperones ;}	{GO:0005515; protein binding; molecular_function}	{XM_010538259.2; PREDICTED: Tarenaya hassleriana glutathionyl-hydroquinone reductase YqjG (LOC104811533), transcript variant X2, mRNA}	{PF13417:Glutathione S-transferase, N-terminal domain PF13409:Glutathione S-transferase, N-terminal domain}
transcript_HQ_SAB_transcript2282/f2p0/3516	-0.72288	1.1781e-05	3.4066e-05	{XP_010687558.1; PREDICTED: respiratory burst oxidase homolog protein E [Beta vulgaris subsp. vulgaris]}	{sp|O81211|RBOHE_ARATH; Respiratory burst oxidase homolog protein E OS=Arabidopsis thaliana GN=RBOHE PE=2 SV=2}	{egr:104436388; K13447 RBOH respiratory burst oxidase [EC:1.6.3.- 1.11.1.-] 1.6.3.-,1.11.1.- ko04016; Environmental Information Processing; Signal transduction; MAPK signaling pathway - plant | ko04626; Organismal Systems; Environmental adaptation; Plant-pathogen interaction}	{At1g19230; KOG0039 Ferric reductase, NADH/NADPH oxidase and related proteins PQ Inorganic ion transport and metabolism ; Secondary metabolites biosynthesis, transport and catabolism ;}	{GO:0055114; oxidation-reduction process; biological_process GO:0005509; calcium ion binding; molecular_function GO:0016491; oxidoreductase activity; molecular_function GO:0050664; oxidoreductase activity, acting on NADH or NADPH, oxygen as acceptor; molecular_function GO:0004601; Peroxidase activity; molecular_function GO:0071988; protein localization to spindle pole body; biological_process GO:…	{XM_010689256.2; PREDICTED: Beta vulgaris subsp. vulgaris respiratory burst oxidase homolog protein E (LOC104901666), mRNA}	{PF17060:Monopolar spindle protein 2 PF00036:EF hand PF13405:EF-hand domain PF13499:EF-hand domain pair PF08030:Ferric reductase NAD binding domain PF13202:EF hand PF08022:FAD-binding domain PF08414:Respiratory burst NADPH oxidase}
transcript_HQ_SAB_transcript21175/f2p0/1557	-0.26803	4.5749e-06	1.3748e-05	{XP_010685987.1; PREDICTED: Peroxidase 57 [Beta vulgaris subsp. vulgaris]}	{sp|Q9FMR0|PER60_ARATH; Peroxidase 60 OS=Arabidopsis thaliana GN=PER60 PE=1 SV=1}	{pmum:103328930; K00430 E1.11.1.7 Peroxidase 1.11.1.7 ko00940; Metabolism; Biosynthesis of other secondary metabolites; Phenylpropanoid biosynthesis}	{NA}	{GO:0055114; oxidation-reduction process; biological_process GO:0004601; Peroxidase activity; molecular_function GO:0006979; response to oxidative stress; biological_process GO:0020037; heme binding; molecular_function}	{AM265608.1; Beta vulgaris mRNA for cationic Peroxidase (cprx1 gene)}	{PF00141:Peroxidase}
transcript_HQ_SAB_transcript20802/f2p0/1580	-1.9955	1.4779e-237	1.1314e-235	{XP_020096261.1; elongation factor 1-gamma 2 [Ananas comosus]}	{sp|Q9FVT2|EF1G2_ARATH; Probable elongation factor 1-gamma 2 OS=Arabidopsis thaliana GN=At1g57720 PE=1 SV=1}	{ath:AT1G57720; K03233 EEF1G elongation factor 1-gamma - ko05134; Human Diseases; Infectious diseases: Bacterial; Legionellosis}	{At1g57720_2; KOG1627 Translation elongation factor EF-1 gamma J Translation, ribosomal structure and biogenesis ;}	{GO:0005515; protein binding; molecular_function GO:0003746; translation elongation factor activity; molecular_function GO:0006414; translational elongation; biological_process}	{XM_010688581.2; PREDICTED: Beta vulgaris subsp. vulgaris elongation factor 1-gamma (LOC104901036), mRNA}	{PF00647:Elongation factor 1 gamma, conserved domain PF13409:Glutathione S-transferase, N-terminal domain PF13417:Glutathione S-transferase, N-terminal domain PF02798:Glutathione S-transferase, N-terminal domain}
transcript_HQ_SAB_transcript20642/f2p0/1592	0.57073	0.00014809	0.00037734	{XP_010693839.1; PREDICTED: Peroxidase 17 [Beta vulgaris subsp. vulgaris]}	{sp|Q9SJZ2|PER17_ARATH; Peroxidase 17 OS=Arabidopsis thaliana GN=PER17 PE=2 SV=1}	{crb:CARUB_v10005220mg; K00430 E1.11.1.7 Peroxidase 1.11.1.7 ko00940; Metabolism; Biosynthesis of other secondary metabolites; Phenylpropanoid biosynthesis}	{NA}	{GO:0055114; oxidation-reduction process; biological_process GO:0006979; response to oxidative stress; biological_process GO:0004601; Peroxidase activity; molecular_function GO:0020037; heme binding; molecular_function}	{XM_010695537.2; PREDICTED: Beta vulgaris subsp. vulgaris Peroxidase 17 (LOC104906740), mRNA}	{PF00141:Peroxidase}
transcript_HQ_SAB_transcript15675/f4p0/1877	3.3483	3.1583e-40	3.6523e-39	{KNA20548.1; hypothetical protein SOVF_051350 [Spinacia oleracea]}	{sp|P25819|CATA2_ARATH; Catalase-2 OS=Arabidopsis thaliana GN=CAT2 PE=2 SV=3}	{cann:107859787; - - - - -}	{At4g35090; KOG0047 Catalase P Inorganic ion transport and metabolism ;}	{GO:0055114; oxidation-reduction process; biological_process GO:0004096; catalase activity; molecular_function GO:0020037; heme binding; molecular_function}	{XM_010694242.2; PREDICTED: Beta vulgaris subsp. vulgaris catalase (LOC104905646), mRNA}	{PF00199:Catalase}
transcript_HQ_SAB_transcript15541/f5p0/1843	2.9212	1.5903e-38	1.7666e-37	{XP_010679779.1; PREDICTED: AAA-ATPase At3g50940 [Beta vulgaris subsp. vulgaris]}	{sp|Q9FN75|AATPI_ARATH; AAA-ATPase At5g17760 OS=Arabidopsis thaliana GN=At5g17760 PE=2 SV=1}	{var:108333949; K08900 BCS1 mitochondrial chaperone BCS1 - -}	{At5g17760; KOG0743 AAA+-type ATPase O Posttranslational modification, protein turnover, chaperones ;}	{GO:0004096; catalase activity; molecular_function GO:0020037; heme binding; molecular_function GO:0005524; ATP binding; molecular_function GO:0006310; DNA recombination; biological_process GO:0055114; oxidation-reduction process; biological_process GO:0016887; ATPase activity; molecular_function GO:0009378; four-way junction helicase activity; molecular_function GO:0006281; DNA repair; biologica…	{XM_017363434.1; PREDICTED: Daucus carota subsp. sativus AAA-ATPase At3g50940-like (LOC108196242), mRNA}	{PF00004:ATPase family associated with various cellular activities (AAA) PF00199:Catalase PF07728:AAA domain (dynein-related subfamily) PF05496:Holliday junction DNA helicase ruvB N-terminus}
transcript_HQ_SAB_transcript15397/f2p0/1894	-0.51052	3.2864e-07	1.0969e-06	{KNA06708.1; hypothetical protein SOVF_178510 [Spinacia oleracea]}	{sp|Q43154|GSHRP_SPIOL; Glutathione reductase, chloroplastic (Fragment) OS=Spinacia oleracea PE=2 SV=1}	{vra:106770425; K00383 GSR, gor glutathione reductase (NADPH) 1.8.1.7 ko00480; Metabolism; Metabolism of other amino acids; Glutathione metabolism | ko04918; Organismal Systems; Endocrine system; Thyroid hormone synthesis}	{At3g24170; KOG0405 Pyridine nucleotide-disulphide oxidoreductase Q Secondary metabolites biosynthesis, transport and catabolism ;}	{GO:0016491; oxidoreductase activity; molecular_function GO:0055114; oxidation-reduction process; biological_process GO:0050660; flavin adenine dinucleotide binding; molecular_function GO:0045454; cell redox homeostasis; biological_process GO:0008033; tRNA processing; biological_process}	{XM_010695660.2; PREDICTED: Beta vulgaris subsp. vulgaris glutathione reductase, chloroplastic (LOC104906832), mRNA}	{PF01134:Glucose inhibited division protein A PF01266:FAD dependent oxidoreductase PF07992:Pyridine nucleotide-disulphide oxidoreductase PF02852:Pyridine nucleotide-disulphide oxidoreductase, dimerisation domain PF12831:FAD dependent oxidoreductase PF01593:Flavin containing amine oxidoreductase PF00070:Pyridine nucleotide-disulphide oxidoreductase}
transcript_HQ_SAB_transcript14459/f2p0/1962	-1.3325	1.4635e-14	7.6765e-14	{XP_010693136.1; PREDICTED: Glutathione S-transferase DHAR2 [Beta vulgaris subsp. vulgaris]}	{sp|Q9FRL8|DHAR2_ARATH; Glutathione S-transferase DHAR2 OS=Arabidopsis thaliana GN=DHAR2 PE=1 SV=1}	{nta:107777254; - - - - -}	{At1g75270; KOG1422 Intracellular Cl- channel CLIC, contains GST domain P Inorganic ion transport and metabolism ;}	{NA}	{XM_010694834.2; PREDICTED: Beta vulgaris subsp. vulgaris Glutathione S-transferase DHAR2 (LOC104906117), mRNA}	{NA}
transcript_HQ_SAB_transcript13671/f4p0/1946	3.8282	4.883e-79	1.0747e-77	{KNA06708.1; hypothetical protein SOVF_178510 [Spinacia oleracea]}	{sp|Q43154|GSHRP_SPIOL; Glutathione reductase, chloroplastic (Fragment) OS=Spinacia oleracea PE=2 SV=1}	{vra:106770425; K00383 GSR, gor glutathione reductase (NADPH) 1.8.1.7 ko00480; Metabolism; Metabolism of other amino acids; Glutathione metabolism | ko04918; Organismal Systems; Endocrine system; Thyroid hormone synthesis}	{At3g24170; KOG0405 Pyridine nucleotide-disulphide oxidoreductase Q Secondary metabolites biosynthesis, transport and catabolism ;}	{GO:0050660; flavin adenine dinucleotide binding; molecular_function GO:0055114; oxidation-reduction process; biological_process GO:0045454; cell redox homeostasis; biological_process GO:0016491; oxidoreductase activity; molecular_function GO:0008033; tRNA processing; biological_process}	{XM_010695660.2; PREDICTED: Beta vulgaris subsp. vulgaris glutathione reductase, chloroplastic (LOC104906832), mRNA}	{PF01134:Glucose inhibited division protein A PF01266:FAD dependent oxidoreductase PF07992:Pyridine nucleotide-disulphide oxidoreductase PF02852:Pyridine nucleotide-disulphide oxidoreductase, dimerisation domain PF00070:Pyridine nucleotide-disulphide oxidoreductase PF01593:Flavin containing amine oxidoreductase PF12831:FAD dependent oxidoreductase}
transcript_HQ_SAB_transcript13632/f6p0/1999	3.6294	1.4355e-23	1.0717e-22	{AAK67359.2; catalase [Suaeda salsa]}	{sp|P17598|CATA1_GOSHI; Catalase isozyme 1 OS=Gossypium hirsutum GN=CAT1 PE=2 SV=2}	{gra:105783611; K03781 katE, CAT, catB, srpA catalase 1.11.1.6 ko01200; Metabolism; Global and overview maps; Carbon metabolism | ko00630; Metabolism; Carbohydrate metabolism; Glyoxylate and dicarboxylate metabolism | ko00380; Metabolism; Amino acid metabolism; Tryptophan metabolism | ko04016; Environmental Information Processing; Signal transduction; MAPK signaling pathway - plant | ko04011; Env…	{At4g35090; KOG0047 Catalase P Inorganic ion transport and metabolism ;}	{GO:0004096; catalase activity; molecular_function GO:0030345; structural constituent of tooth enamel; molecular_function GO:0020037; heme binding; molecular_function GO:0055114; oxidation-reduction process; biological_process GO:0042475; odontogenesis of dentine-containing tooth; biological_process}	{KJ690269.1; Bassia scoparia CAT1 mRNA, complete cds}	{PF05111:Ameloblastin precursor (Amelin) PF00199:Catalase}
transcript_HQ_SAB_transcript12922/f2p0/2062	0.2482	1.5613e-05	4.456e-05	{XP_010682545.1; PREDICTED: probable nucleoredoxin 1 [Beta vulgaris subsp. vulgaris]}	{sp|O80763|NRX1_ARATH; Probable nucleoredoxin 1 OS=Arabidopsis thaliana GN=At1g60420 PE=1 SV=1}	{vvi:100852822; K17609 NXN nucleoredoxin 1.8.1.8 -}	{At1g60420; KOG2501 Thioredoxin, nucleoredoxin and related proteins R General function prediction only ;}	{GO:0016209; NA GO:0004602; glutathione Peroxidase activity; molecular_function GO:0055114; oxidation-reduction process; biological_process GO:0045454; cell redox homeostasis; biological_process GO:0016491; oxidoreductase activity; molecular_function GO:0051539; 4 iron, 4 sulfur cluster binding; molecular_function GO:0006979; response to oxidative stress; biological_process}	{XM_010684243.2; PREDICTED: Beta vulgaris subsp. vulgaris probable nucleoredoxin 1 (LOC104897380), mRNA}	{PF10589:NADH-ubiquinone oxidoreductase-F iron-sulfur binding region PF00085:Thioredoxin PF00578:AhpC/TSA family PF08534:Redoxin PF00255:Glutathione Peroxidase}
transcript_HQ_SAB_transcript12266/f4p0/2089	-0.25498	8.7228e-05	0.00022888	{XP_010686506.1; PREDICTED: monothiol glutaredoxin-S17 [Beta vulgaris subsp. vulgaris]}	{sp|Q9ZPH2|GRS17_ARATH; Monothiol glutaredoxin-S17 OS=Arabidopsis thaliana GN=GRXS17 PE=1 SV=1}	{sot:102595988; - - - - -}	{At4g04950; KOG0911 Glutaredoxin-related protein O Posttranslational modification, protein turnover, chaperones ;}	{GO:0009294; DNA mediated transformation; biological_process GO:0045454; cell redox homeostasis; biological_process GO:0005515; protein binding; molecular_function GO:0009055; NA GO:0015035; protein disulfide oxidoreductase activity; molecular_function}	{XM_010688205.2; PREDICTED: Beta vulgaris subsp. vulgaris monothiol glutaredoxin-S17 (LOC104900712), transcript variant X2, mRNA}	{PF00462:Glutaredoxin PF00085:Thioredoxin PF13417:Glutathione S-transferase, N-terminal domain PF02481:DNA recombination-mediator protein A}
transcript_HQ_SAB_transcript10611/f4p0/2246	#NAME?	9.3144e-14	4.6945e-13	{NA}	{NA}	{NA}	{NA}	{NA}	{XR_002040922.1; PREDICTED: Beta vulgaris subsp. vulgaris Peroxidase P7-like (LOC104903393), transcript variant X4, misc_RNA}	{NA}
transcript_HQ_SAB_transcript10237/f6p0/2239	0.32119	0.00010739	0.00027846	{XP_010679170.1; PREDICTED: glutathione reductase, chloroplastic [Beta vulgaris subsp. vulgaris]}	{sp|P80461|GSHRP_TOBAC; Glutathione reductase, chloroplastic (Fragment) OS=Nicotiana tabacum GN=GOR PE=1 SV=1}	{bvg:104894596; K00383 GSR, gor glutathione reductase (NADPH) 1.8.1.7 ko00480; Metabolism; Metabolism of other amino acids; Glutathione metabolism | ko04918; Organismal Systems; Endocrine system; Thyroid hormone synthesis}	{At3g54660; KOG0405 Pyridine nucleotide-disulphide oxidoreductase Q Secondary metabolites biosynthesis, transport and catabolism ;}	{GO:0006631; fatty acid metabolic process; biological_process GO:0003857; 3-hydroxyacyl-CoA dehydrogenase activity; molecular_function GO:0016491; oxidoreductase activity; molecular_function GO:0051287; NAD binding; molecular_function GO:0050660; flavin adenine dinucleotide binding; molecular_function GO:0045454; cell redox homeostasis; biological_process GO:0055114; oxidation-reduction process; …	{XM_010680868.1; PREDICTED: Beta vulgaris subsp. vulgaris glutathione reductase, chloroplastic (LOC104894596), mRNA}	{PF02852:Pyridine nucleotide-disulphide oxidoreductase, dimerisation domain PF07992:Pyridine nucleotide-disulphide oxidoreductase PF02737:3-hydroxyacyl-CoA dehydrogenase, NAD binding domain PF00070:Pyridine nucleotide-disulphide oxidoreductase PF02826:D-isomer specific 2-hydroxyacid dehydrogenase, NAD binding domain PF01134:Glucose inhibited division protein A}
transcript_HQ_BAB_transcript950/f2p0/4410	-0.63773	2.4961e-05	6.9741e-05	{XP_010673121.1; PREDICTED: transcription elongation factor SPT6 homolog isoform X2 [Beta vulgaris subsp. vulgaris]}	{sp|A8MS85|SPT61_ARATH; Transcription elongation factor SPT6 homolog OS=Arabidopsis thaliana GN=SPT6 PE=1 SV=1}	{bvg:104889562; K11292 SUPT6H, SPT6 transcription elongation factor SPT6 - -}	{At1g65440; KOG1856 Transcription elongation factor SPT6 A RNA processing and modification ;}	{GO:0046872; metal ion binding; molecular_function GO:0006801; superoxide metabolic process; biological_process GO:0030123; AP-3 adaptor complex; cellular_component GO:0055114; oxidation-reduction process; biological_process GO:0003677; DNA binding; molecular_function GO:0015031; protein transport; biological_process}	{GQ422752.1; Amaranthus hypochondriacus cytosolic copper/zinc Superoxide dismutase (SOD) mRNA, complete cds}	{PF14641:Helix-turn-helix DNA-binding domain of SPT6 PF00080:Copper/zinc Superoxide dismutase (SODC) PF06375:Bovine leukaemia virus receptor (BLVR)}
transcript_HQ_BAB_transcript8917/f2p0/2712	-0.97487	0.0015404	0.003439	{KNA18666.1; hypothetical protein SOVF_068620 [Spinacia oleracea]}	{sp|Q42564|APX3_ARATH; L-Ascorbate peroxidase 3, peroxisomal OS=Arabidopsis thaliana GN=APX3 PE=1 SV=1}	{sbi:SORBI_06g001970; K00434 E1.11.1.11 L-Ascorbate peroxidase 1.11.1.11 ko00053; Metabolism; Carbohydrate metabolism; Ascorbate and aldarate metabolism | ko00480; Metabolism; Metabolism of other amino acids; Glutathione metabolism}	{NA}	{GO:0020037; heme binding; molecular_function GO:0055114; oxidation-reduction process; biological_process GO:0006979; response to oxidative stress; biological_process GO:0004601; Peroxidase activity; molecular_function}	{XM_010681600.2; PREDICTED: Beta vulgaris subsp. vulgaris L-Ascorbate peroxidase 3, peroxisomal (LOC104895170), mRNA}	{PF00141:Peroxidase}
transcript_HQ_BAB_transcript6839/f2p0/3008	-1.8147	6.6705e-13	3.2317e-12	{YP_009160802.1; photosystem I P700 apoprotein A1 (chloroplast) [Haloxylon ammodendron]}	{sp|Q9MTN8|PSAA_OENEH; Photosystem I P700 chlorophyll a apoprotein A1 OS=Oenothera elata subsp. hookeri GN=psaA PE=3 SV=2}	{cic:CICLE_v10030467mg; K02689 psaA photosystem I P700 chlorophyll a apoprotein A1 - ko00195; Metabolism; Energy metabolism; Photosynthesis}	{NA}	{GO:0020037; heme binding; molecular_function GO:0055114; oxidation-reduction process; biological_process GO:0006979; response to oxidative stress; biological_process GO:0004601; Peroxidase activity; molecular_function}	{KF534479.1; Haloxylon persicum chloroplast, complete genome}	{PF00141:Peroxidase}
transcript_HQ_BAB_transcript6579/f2p0/3040	0.48664	0.011277	0.021841	{XP_019105392.1; PREDICTED: L-Ascorbate peroxidase 3, peroxisomal-like [Beta vulgaris subsp. vulgaris]}	{sp|Q7XZP5|APX5_ARATH; L-Ascorbate peroxidase 5, peroxisomal OS=Arabidopsis thaliana GN=APX5 PE=1 SV=2}	{fve:101312209; K00434 E1.11.1.11 L-Ascorbate peroxidase 1.11.1.11 ko00053; Metabolism; Carbohydrate metabolism; Ascorbate and aldarate metabolism | ko00480; Metabolism; Metabolism of other amino acids; Glutathione metabolism}	{NA}	{NA}	{XM_010681600.2; PREDICTED: Beta vulgaris subsp. vulgaris L-Ascorbate peroxidase 3, peroxisomal (LOC104895170), mRNA}	{NA}
transcript_HQ_BAB_transcript6087/f2p0/3068	-1.5785	2.4354e-31	2.2627e-30	{KNA08419.1; hypothetical protein SOVF_162770 [Spinacia oleracea]}	{sp|Q948T9|RBOHB_SOLTU; Respiratory burst oxidase homolog protein B OS=Solanum tuberosum GN=RBOHB PE=1 SV=1}	{bvg:104890306; K13447 RBOH respiratory burst oxidase [EC:1.6.3.- 1.11.1.-] 1.6.3.-,1.11.1.- ko04016; Environmental Information Processing; Signal transduction; MAPK signaling pathway - plant | ko04626; Organismal Systems; Environmental adaptation; Plant-pathogen interaction}	{At5g51060; KOG0039 Ferric reductase, NADH/NADPH oxidase and related proteins PQ Inorganic ion transport and metabolism ; Secondary metabolites biosynthesis, transport and catabolism ;}	{GO:0016514; SWI/SNF complex; cellular_component GO:0005634; nucleus; cellular_component GO:0004601; Peroxidase activity; molecular_function GO:0006779; porphyrin biosynthetic process; biological_process GO:0050664; oxidoreductase activity, acting on NADH or NADPH, oxygen as acceptor; molecular_function GO:0055114; oxidation-reduction process; biological_process GO:0006338; chromatin remodeling; …	{NA}	{PF09510:Rtt102p-like transcription regulator protein PF10414:Sirohaem synthase dimerisation region PF08414:Respiratory burst NADPH oxidase}
transcript_HQ_BAB_transcript4067/f2p0/3466	-0.92604	2.1022e-77	4.5183e-76	{KNA08419.1; hypothetical protein SOVF_162770 [Spinacia oleracea]}	{sp|Q948T9|RBOHB_SOLTU; Respiratory burst oxidase homolog protein B OS=Solanum tuberosum GN=RBOHB PE=1 SV=1}	{bvg:104890306; K13447 RBOH respiratory burst oxidase [EC:1.6.3.- 1.11.1.-] 1.6.3.-,1.11.1.- ko04016; Environmental Information Processing; Signal transduction; MAPK signaling pathway - plant | ko04626; Organismal Systems; Environmental adaptation; Plant-pathogen interaction}	{At5g47910; KOG0039 Ferric reductase, NADH/NADPH oxidase and related proteins PQ Inorganic ion transport and metabolism ; Secondary metabolites biosynthesis, transport and catabolism ;}	{GO:0035307; positive regulation of protein dephosphorylation; biological_process GO:0050664; oxidoreductase activity, acting on NADH or NADPH, oxygen as acceptor; molecular_function GO:0006779; porphyrin biosynthetic process; biological_process GO:0055114; oxidation-reduction process; biological_process GO:0006338; chromatin remodeling; biological_process GO:0016586; RSC complex; cellular_compon…	{XM_010675737.2; PREDICTED: Beta vulgaris subsp. vulgaris respiratory burst oxidase homolog protein B (LOC104890306), mRNA}	{PF13405:EF-hand domain PF10414:Sirohaem synthase dimerisation region PF08030:Ferric reductase NAD binding domain PF00036:EF hand PF09510:Rtt102p-like transcription regulator protein PF13202:EF hand PF09771:Transmembrane protein 188 PF08414:Respiratory burst NADPH oxidase PF13499:EF-hand domain pair PF08022:FAD-binding domain}
transcript_HQ_BAB_transcript3384/f2p0/3577	-0.47038	2.5481e-39	2.8851e-38	{KNA08419.1; hypothetical protein SOVF_162770 [Spinacia oleracea]}	{sp|Q948T9|RBOHB_SOLTU; Respiratory burst oxidase homolog protein B OS=Solanum tuberosum GN=RBOHB PE=1 SV=1}	{bvg:104890306; K13447 RBOH respiratory burst oxidase [EC:1.6.3.- 1.11.1.-] 1.6.3.-,1.11.1.- ko04016; Environmental Information Processing; Signal transduction; MAPK signaling pathway - plant | ko04626; Organismal Systems; Environmental adaptation; Plant-pathogen interaction}	{At5g47910; KOG0039 Ferric reductase, NADH/NADPH oxidase and related proteins PQ Inorganic ion transport and metabolism ; Secondary metabolites biosynthesis, transport and catabolism ;}	{GO:0005634; nucleus; cellular_component GO:0016514; SWI/SNF complex; cellular_component GO:0005509; calcium ion binding; molecular_function GO:0071595; Nem1-Spo7 phosphatase complex; cellular_component GO:0004601; Peroxidase activity; molecular_function GO:0035307; positive regulation of protein dephosphorylation; biological_process GO:0050664; oxidoreductase activity, acting on NADH or NADPH, o…	{XM_010675737.2; PREDICTED: Beta vulgaris subsp. vulgaris respiratory burst oxidase homolog protein B (LOC104890306), mRNA}	{PF08030:Ferric reductase NAD binding domain PF00036:EF hand PF13405:EF-hand domain PF10414:Sirohaem synthase dimerisation region PF09771:Transmembrane protein 188 PF08414:Respiratory burst NADPH oxidase PF13499:EF-hand domain pair PF08022:FAD-binding domain PF09510:Rtt102p-like transcription regulator protein PF13202:EF hand}
transcript_HQ_BAB_transcript2992/f3p0/3680	-1.7893	1.7563e-39	1.995e-38	{XP_010687558.1; PREDICTED: respiratory burst oxidase homolog protein E [Beta vulgaris subsp. vulgaris]}	{sp|O81211|RBOHE_ARATH; Respiratory burst oxidase homolog protein E OS=Arabidopsis thaliana GN=RBOHE PE=2 SV=2}	{egr:104436388; K13447 RBOH respiratory burst oxidase [EC:1.6.3.- 1.11.1.-] 1.6.3.-,1.11.1.- ko04016; Environmental Information Processing; Signal transduction; MAPK signaling pathway - plant | ko04626; Organismal Systems; Environmental adaptation; Plant-pathogen interaction}	{At1g19230; KOG0039 Ferric reductase, NADH/NADPH oxidase and related proteins PQ Inorganic ion transport and metabolism ; Secondary metabolites biosynthesis, transport and catabolism ;}	{GO:0016491; oxidoreductase activity; molecular_function GO:0004601; Peroxidase activity; molecular_function GO:0005509; calcium ion binding; molecular_function GO:0050664; oxidoreductase activity, acting on NADH or NADPH, oxygen as acceptor; molecular_function GO:0030474; spindle pole body duplication; biological_process GO:0071988; protein localization to spindle pole body; biological_process G…	{XM_010689256.2; PREDICTED: Beta vulgaris subsp. vulgaris respiratory burst oxidase homolog protein E (LOC104901666), mRNA}	{PF13405:EF-hand domain PF08030:Ferric reductase NAD binding domain PF00036:EF hand PF17060:Monopolar spindle protein 2 PF13202:EF hand PF08414:Respiratory burst NADPH oxidase PF13499:EF-hand domain pair PF08022:FAD-binding domain}
transcript_HQ_BAB_transcript2289/f3p0/3955	-0.35778	0.00024799	0.00061525	{XP_010673121.1; PREDICTED: transcription elongation factor SPT6 homolog isoform X2 [Beta vulgaris subsp. vulgaris]}	{sp|A8MS85|SPT61_ARATH; Transcription elongation factor SPT6 homolog OS=Arabidopsis thaliana GN=SPT6 PE=1 SV=1}	{bvg:104889562; K11292 SUPT6H, SPT6 transcription elongation factor SPT6 - -}	{At1g65440; KOG1856 Transcription elongation factor SPT6 A RNA processing and modification ;}	{GO:0015031; protein transport; biological_process GO:0046872; metal ion binding; molecular_function GO:0006801; superoxide metabolic process; biological_process GO:0003677; DNA binding; molecular_function GO:0030123; AP-3 adaptor complex; cellular_component GO:0055114; oxidation-reduction process; biological_process}	{XM_010674819.2; PREDICTED: Beta vulgaris subsp. vulgaris transcription elongation factor SPT6 homolog (LOC104889562), transcript variant X2, mRNA}	{PF14641:Helix-turn-helix DNA-binding domain of SPT6 PF00080:Copper/zinc Superoxide dismutase (SODC) PF06375:Bovine leukaemia virus receptor (BLVR)}
transcript_HQ_BAB_transcript20368/f2p0/1037	-0.59806	2.8128e-11	1.2391e-10	{AFD50703.1; manganese Superoxide dismutase [Salicornia europaea]}	{sp|Q9SM64|SODM_PRUPE; Superoxide dismutase [Mn], mitochondrial OS=Prunus persica GN=SOD PE=2 SV=1}	{bvg:104887645; K04564 SOD2 Superoxide dismutase, Fe-Mn family 1.15.1.1 ko04013; Environmental Information Processing; Signal transduction; MAPK signaling pathway - fly | ko04068; Environmental Information Processing; Signal transduction; FoxO signaling pathway | ko04146; Cellular Processes; Transport and catabolism; Peroxisome | ko04211; Organismal Systems; Aging; Longevity regulating pathway | …	{At3g10920; KOG0876 Manganese Superoxide dismutase P Inorganic ion transport and metabolism ;}	{GO:0046872; metal ion binding; molecular_function GO:0006801; superoxide metabolic process; biological_process GO:0004784; Superoxide dismutase activity; molecular_function GO:0055114; oxidation-reduction process; biological_process}	{JQ061158.1; Salicornia europaea manganese Superoxide dismutase (MnSOD) mRNA, complete cds}	{PF02777:Iron/manganese Superoxide dismutases, C-terminal domain PF00081:Iron/manganese Superoxide dismutases, alpha-hairpin domain}
transcript_HQ_BAB_transcript20282/f2p0/1118	0.11339	0.005139	0.010588	{XP_010689420.1; PREDICTED: L-Ascorbate peroxidase, cytosolic [Beta vulgaris subsp. vulgaris]}	{sp|P48534|APX1_PEA; L-Ascorbate peroxidase, cytosolic OS=Pisum sativum GN=APX1 PE=1 SV=2}	{pda:103702852; K00434 E1.11.1.11 L-Ascorbate peroxidase 1.11.1.11 ko00053; Metabolism; Carbohydrate metabolism; Ascorbate and aldarate metabolism | ko00480; Metabolism; Metabolism of other amino acids; Glutathione metabolism}	{NA}	{GO:0020037; heme binding; molecular_function GO:0055114; oxidation-reduction process; biological_process GO:0004601; Peroxidase activity; molecular_function GO:0006979; response to oxidative stress; biological_process}	{XM_010691118.2; PREDICTED: Beta vulgaris subsp. vulgaris L-Ascorbate peroxidase, cytosolic (LOC104903122), mRNA}	{PF00141:Peroxidase}
transcript_HQ_BAB_transcript20281/f3p0/1113	-0.75513	3.7981e-28	3.2189e-27	{XP_010694823.1; PREDICTED: probable Glutathione S-transferase [Beta vulgaris subsp. vulgaris]}	{sp|Q03666|GSTX4_TOBAC; Probable Glutathione S-transferase OS=Nicotiana tabacum PE=2 SV=1}	{cam:101515160; K00799 GST, gst Glutathione S-transferase 2.5.1.18 ko00480; Metabolism; Metabolism of other amino acids; Glutathione metabolism | ko00980; Metabolism; Xenobiotics biodegradation and metabolism; Metabolism of xenobiotics by cytochrome P450 | ko00982; Metabolism; Xenobiotics biodegradation and metabolism; Drug metabolism - cytochrome P450 | ko05204; Human Diseases; Cancers: Overview…	{At1g17180; KOG0406 Glutathione S-transferase O Posttranslational modification, protein turnover, chaperones ;}	{GO:0005515; protein binding; molecular_function}	{XM_010696531.1; PREDICTED: Beta vulgaris subsp. vulgaris probable Glutathione S-transferase (LOC104907580), mRNA}	{PF13409:Glutathione S-transferase, N-terminal domain PF02798:Glutathione S-transferase, N-terminal domain PF13417:Glutathione S-transferase, N-terminal domain}
transcript_HQ_BAB_transcript20264/f2p0/1121	-0.41038	6.0327e-23	4.3936e-22	{KNA15210.1; hypothetical protein SOVF_100390, partial [Spinacia oleracea]}	{sp|Q8H8U5|IN21B_ORYSJ; Protein IN2-1 homolog B OS=Oryza sativa subsp. japonica GN=GSTZ5 PE=2 SV=1}	{nnu:104599214; K00799 GST, gst Glutathione S-transferase 2.5.1.18 ko00480; Metabolism; Metabolism of other amino acids; Glutathione metabolism | ko00980; Metabolism; Xenobiotics biodegradation and metabolism; Metabolism of xenobiotics by cytochrome P450 | ko00982; Metabolism; Xenobiotics biodegradation and metabolism; Drug metabolism - cytochrome P450 | ko05204; Human Diseases; Cancers: Overview…	{At5g02790; KOG0406 Glutathione S-transferase O Posttranslational modification, protein turnover, chaperones ;}	{GO:0005515; protein binding; molecular_function}	{XM_010693580.2; PREDICTED: Beta vulgaris subsp. vulgaris protein IN2-1 homolog B (LOC104905130), mRNA}	{PF02798:Glutathione S-transferase, N-terminal domain PF13409:Glutathione S-transferase, N-terminal domain PF13417:Glutathione S-transferase, N-terminal domain}
transcript_HQ_BAB_transcript20201/f2p0/1168	0.56481	5.6036e-30	5.023e-29	{KNA18404.1; hypothetical protein SOVF_070820 [Spinacia oleracea]}	{sp|Q7XZP5|APX5_ARATH; L-Ascorbate peroxidase 5, peroxisomal OS=Arabidopsis thaliana GN=APX5 PE=1 SV=2}	{eus:EUTSA_v10025942mg; K00434 E1.11.1.11 L-Ascorbate peroxidase 1.11.1.11 ko00053; Metabolism; Carbohydrate metabolism; Ascorbate and aldarate metabolism | ko00480; Metabolism; Metabolism of other amino acids; Glutathione metabolism}	{NA}	{GO:0006979; response to oxidative stress; biological_process GO:0004601; Peroxidase activity; molecular_function GO:0055114; oxidation-reduction process; biological_process GO:0020037; heme binding; molecular_function}	{XM_019250091.1; PREDICTED: Beta vulgaris subsp. vulgaris L-Ascorbate peroxidase 5, peroxisomal-like (LOC104895169), mRNA}	{PF00141:Peroxidase}
transcript_HQ_BAB_transcript20191/f4p0/1163	1.1194	3.2371e-132	1.217e-130	{XP_010679902.1; PREDICTED: L-Ascorbate peroxidase 3, peroxisomal [Beta vulgaris subsp. vulgaris]}	{sp|Q42564|APX3_ARATH; L-Ascorbate peroxidase 3, peroxisomal OS=Arabidopsis thaliana GN=APX3 PE=1 SV=1}	{vra:106756337; K00434 E1.11.1.11 L-Ascorbate peroxidase 1.11.1.11 ko00053; Metabolism; Carbohydrate metabolism; Ascorbate and aldarate metabolism | ko00480; Metabolism; Metabolism of other amino acids; Glutathione metabolism}	{NA}	{GO:0020037; heme binding; molecular_function GO:0055114; oxidation-reduction process; biological_process GO:0006979; response to oxidative stress; biological_process GO:0004601; Peroxidase activity; molecular_function}	{XM_010681600.2; PREDICTED: Beta vulgaris subsp. vulgaris L-Ascorbate peroxidase 3, peroxisomal (LOC104895170), mRNA}	{PF00141:Peroxidase}
transcript_HQ_BAB_transcript20019/f2p0/1250	0.2965	5.279e-09	2.0064e-08	{BAS29464.1; iron Superoxide dismutase [Suaeda maritima]}	{sp|Q9LU64|SODF2_ARATH; Superoxide dismutase [Fe] 2, chloroplastic OS=Arabidopsis thaliana GN=FSD2 PE=1 SV=1}	{bvg:104892465; K04564 SOD2 Superoxide dismutase, Fe-Mn family 1.15.1.1 ko04013; Environmental Information Processing; Signal transduction; MAPK signaling pathway - fly | ko04068; Environmental Information Processing; Signal transduction; FoxO signaling pathway | ko04146; Cellular Processes; Transport and catabolism; Peroxisome | ko04211; Organismal Systems; Aging; Longevity regulating pathway | …	{At5g51100; KOG0876 Manganese Superoxide dismutase P Inorganic ion transport and metabolism ;}	{GO:0006801; superoxide metabolic process; biological_process GO:0004784; Superoxide dismutase activity; molecular_function GO:0046872; metal ion binding; molecular_function GO:0055114; oxidation-reduction process; biological_process}	{LC027286.1; Suaeda maritima Fe-SOD mRNA for iron Superoxide dismutase, complete cds, country: Egypt}	{PF02777:Iron/manganese Superoxide dismutases, C-terminal domain PF00081:Iron/manganese Superoxide dismutases, alpha-hairpin domain}
transcript_HQ_BAB_transcript19883/f6p0/1298	0.64995	5.8943e-23	4.2958e-22	{XP_010685964.1; PREDICTED: Peroxidase 4 [Beta vulgaris subsp. vulgaris]}	{sp|A7NY33|PER4_VITVI; Peroxidase 4 OS=Vitis vinifera GN=GSVIVT00023967001 PE=1 SV=1}	{nnu:104597205; K00430 E1.11.1.7 Peroxidase 1.11.1.7 ko00940; Metabolism; Biosynthesis of other secondary metabolites; Phenylpropanoid biosynthesis}	{NA}	{GO:0055114; oxidation-reduction process; biological_process GO:0020037; heme binding; molecular_function GO:0004601; Peroxidase activity; molecular_function GO:0006979; response to oxidative stress; biological_process}	{NA}	{PF00141:Peroxidase}
transcript_HQ_BAB_transcript19879/f4p0/1293	-1.9036	3.1307e-244	2.4961e-242	{KNA18404.1; hypothetical protein SOVF_070820 [Spinacia oleracea]}	{sp|Q7XZP5|APX5_ARATH; L-Ascorbate peroxidase 5, peroxisomal OS=Arabidopsis thaliana GN=APX5 PE=1 SV=2}	{crb:CARUB_v10007422mg; K00434 E1.11.1.11 L-Ascorbate peroxidase 1.11.1.11 ko00053; Metabolism; Carbohydrate metabolism; Ascorbate and aldarate metabolism | ko00480; Metabolism; Metabolism of other amino acids; Glutathione metabolism}	{NA}	{GO:0006979; response to oxidative stress; biological_process GO:0004601; Peroxidase activity; molecular_function GO:0055114; oxidation-reduction process; biological_process GO:0020037; heme binding; molecular_function}	{D49679.1; Spinacia oleracea mRNA for Ascorbate peroxidase, complete cds}	{PF00141:Peroxidase}
transcript_HQ_BAB_transcript19823/f2p0/1273	0.31147	0.00097745	0.002246	{XP_010695722.1; PREDICTED: Peroxidase P7 [Beta vulgaris subsp. vulgaris]}	{sp|A7NY33|PER4_VITVI; Peroxidase 4 OS=Vitis vinifera GN=GSVIVT00023967001 PE=1 SV=1}	{bvg:104908326; K00430 E1.11.1.7 Peroxidase 1.11.1.7 ko00940; Metabolism; Biosynthesis of other secondary metabolites; Phenylpropanoid biosynthesis}	{NA}	{GO:0020037; heme binding; molecular_function GO:0055114; oxidation-reduction process; biological_process GO:0004601; Peroxidase activity; molecular_function GO:0006979; response to oxidative stress; biological_process}	{XM_010697420.2; PREDICTED: Beta vulgaris subsp. vulgaris Peroxidase P7 (LOC104908326), mRNA}	{PF00141:Peroxidase}
transcript_HQ_BAB_transcript19810/f2p0/1300	-0.96074	2.149e-09	8.3896e-09	{XP_010670653.1; PREDICTED: protein OVEREXPRESSOR OF CATIONIC Peroxidase 3 [Beta vulgaris subsp. vulgaris]}	{sp|Q8H0V5|OCP3_ARATH; Protein OVEREXPRESSOR OF CATIONIC Peroxidase 3 OS=Arabidopsis thaliana GN=OCP3 PE=1 SV=1}	{bvg:104887662; - - - - -}	{NA}	{GO:0003677; DNA binding; molecular_function GO:0006351; transcription, DNA-dependent; biological_process GO:0003887; DNA-directed DNA polymerase activity; molecular_function}	{XM_010672351.2; PREDICTED: Beta vulgaris subsp. vulgaris hypothetical protein (LOC104887662), mRNA}	{PF00046:Homeobox domain PF04931:DNA polymerase phi}
transcript_HQ_BAB_transcript19736/f2p0/1364	0.61284	3.3648e-19	2.1478e-18	{XP_010686841.1; PREDICTED: Peroxidase 42 [Beta vulgaris subsp. vulgaris]}	{sp|Q9SB81|PER42_ARATH; Peroxidase 42 OS=Arabidopsis thaliana GN=PER42 PE=1 SV=2}	{fve:101292774; K00430 E1.11.1.7 Peroxidase 1.11.1.7 ko00940; Metabolism; Biosynthesis of other secondary metabolites; Phenylpropanoid biosynthesis}	{NA}	{GO:0055114; oxidation-reduction process; biological_process GO:0020037; heme binding; molecular_function GO:0006979; response to oxidative stress; biological_process GO:0004601; Peroxidase activity; molecular_function}	{XM_010688539.2; PREDICTED: Beta vulgaris subsp. vulgaris Peroxidase 42 (LOC104900996), mRNA}	{PF00141:Peroxidase}
transcript_HQ_BAB_transcript19702/f3p0/1360	-0.45874	2.7621e-15	1.4975e-14	{XP_010685987.1; PREDICTED: Peroxidase 57 [Beta vulgaris subsp. vulgaris]}	{sp|Q9FMR0|PER60_ARATH; Peroxidase 60 OS=Arabidopsis thaliana GN=PER60 PE=1 SV=1}	{pmum:103328930; K00430 E1.11.1.7 Peroxidase 1.11.1.7 ko00940; Metabolism; Biosynthesis of other secondary metabolites; Phenylpropanoid biosynthesis}	{NA}	{GO:0006979; response to oxidative stress; biological_process GO:0004601; Peroxidase activity; molecular_function GO:0055114; oxidation-reduction process; biological_process GO:0020037; heme binding; molecular_function}	{AM265608.1; Beta vulgaris mRNA for cationic Peroxidase (cprx1 gene)}	{PF00141:Peroxidase}
transcript_HQ_BAB_transcript19599/f3p0/1384	-0.39743	9.5995e-05	0.00025042	{XP_010687743.1; PREDICTED: uncharacterized protein LOC104901818 isoform X1 [Beta vulgaris subsp. vulgaris]}	{sp|P42620|YQJG_ECOLI; Glutathionyl-hydroquinone reductase YqjG OS=Escherichia coli (strain K12) GN=yqjG PE=1 SV=1}	{vvi:100268002; K07393 ECM4 putative Glutathione S-transferase - -}	{At5g45020; KOG2903 Predicted Glutathione S-transferase O Posttranslational modification, protein turnover, chaperones ;}	{GO:0005515; protein binding; molecular_function}	{XM_010538259.2; PREDICTED: Tarenaya hassleriana glutathionyl-hydroquinone reductase YqjG (LOC104811533), transcript variant X2, mRNA}	{PF13409:Glutathione S-transferase, N-terminal domain PF13417:Glutathione S-transferase, N-terminal domain}
transcript_HQ_BAB_transcript19528/f2p0/1420	0.68838	4.7368e-08	1.6885e-07	{KNA06210.1; hypothetical protein SOVF_183170 [Spinacia oleracea]}	{sp|Q9THX6|TL29_SOLLC; Thylakoid lumenal 29 kDa protein, chloroplastic OS=Solanum lycopersicum GN=CLEB3J9 PE=3 SV=1}	{bvg:104891829; K00434 E1.11.1.11 L-Ascorbate peroxidase 1.11.1.11 ko00053; Metabolism; Carbohydrate metabolism; Ascorbate and aldarate metabolism | ko00480; Metabolism; Metabolism of other amino acids; Glutathione metabolism}	{NA}	{GO:0004601; Peroxidase activity; molecular_function GO:0006979; response to oxidative stress; biological_process GO:0055114; oxidation-reduction process; biological_process GO:0020037; heme binding; molecular_function}	{XM_010677596.2; PREDICTED: Beta vulgaris subsp. vulgaris thylakoid lumenal 29 kDa protein, chloroplastic (LOC104891829), transcript variant X1, mRNA}	{PF00141:Peroxidase}
transcript_HQ_BAB_transcript19369/f3p0/1439	-0.68965	2.5246e-37	2.7284e-36	{BAS29464.1; iron Superoxide dismutase [Suaeda maritima]}	{sp|Q9LU64|SODF2_ARATH; Superoxide dismutase [Fe] 2, chloroplastic OS=Arabidopsis thaliana GN=FSD2 PE=1 SV=1}	{bvg:104892465; K04564 SOD2 Superoxide dismutase, Fe-Mn family 1.15.1.1 ko04013; Environmental Information Processing; Signal transduction; MAPK signaling pathway - fly | ko04068; Environmental Information Processing; Signal transduction; FoxO signaling pathway | ko04146; Cellular Processes; Transport and catabolism; Peroxisome | ko04211; Organismal Systems; Aging; Longevity regulating pathway | …	{At5g51100; KOG0876 Manganese Superoxide dismutase P Inorganic ion transport and metabolism ;}	{GO:0046872; metal ion binding; molecular_function GO:0004784; Superoxide dismutase activity; molecular_function GO:0006801; superoxide metabolic process; biological_process GO:0055114; oxidation-reduction process; biological_process}	{LC027286.1; Suaeda maritima Fe-SOD mRNA for iron Superoxide dismutase, complete cds, country: Egypt}	{PF02777:Iron/manganese Superoxide dismutases, C-terminal domain PF00081:Iron/manganese Superoxide dismutases, alpha-hairpin domain}
transcript_HQ_BAB_transcript19040/f4p0/1464	0.17648	0.0043606	0.0090905	{XP_010683726.1; PREDICTED: uncharacterized protein LOC104898359 [Beta vulgaris subsp. vulgaris]}	{NA}	{cic:CICLE_v10012144mg; - - - - -}	{NA}	{GO:0045454; cell redox homeostasis; biological_process GO:0015035; protein disulfide oxidoreductase activity; molecular_function GO:0005515; protein binding; molecular_function GO:0009055; NA}	{XM_010685424.2; PREDICTED: Beta vulgaris subsp. vulgaris hypothetical protein (LOC104898359), transcript variant X1, mRNA}	{PF00462:Glutaredoxin PF13409:Glutathione S-transferase, N-terminal domain PF02798:Glutathione S-transferase, N-terminal domain PF13417:Glutathione S-transferase, N-terminal domain}
transcript_HQ_BAB_transcript18624/f5p0/1576	-0.35891	4.4201e-05	0.00012001	{KNA16311.1; hypothetical protein SOVF_090200 [Spinacia oleracea]}	{sp|P42620|YQJG_ECOLI; Glutathionyl-hydroquinone reductase YqjG OS=Escherichia coli (strain K12) GN=yqjG PE=1 SV=1}	{pper:PRUPE_ppa006395mg; K07393 ECM4 putative Glutathione S-transferase - -}	{At5g44000; KOG2903 Predicted Glutathione S-transferase O Posttranslational modification, protein turnover, chaperones ;}	{GO:0005515; protein binding; molecular_function}	{XM_010686587.2; PREDICTED: Beta vulgaris subsp. vulgaris glutathionyl-hydroquinone reductase YqjG (LOC104899404), mRNA}	{PF13409:Glutathione S-transferase, N-terminal domain PF13417:Glutathione S-transferase, N-terminal domain}
transcript_HQ_BAB_transcript18469/f2p0/1600	-1.3958	1.0315e-40	1.2121e-39	{ADA68878.1; stroma Ascorbate peroxidase precursor (chloroplast) [Suaeda salsa]}	{sp|Q42593|APXT_ARATH; L-Ascorbate peroxidase T, chloroplastic OS=Arabidopsis thaliana GN=APXT PE=2 SV=2}	{bvg:104891011; K00434 E1.11.1.11 L-Ascorbate peroxidase 1.11.1.11 ko00053; Metabolism; Carbohydrate metabolism; Ascorbate and aldarate metabolism | ko00480; Metabolism; Metabolism of other amino acids; Glutathione metabolism}	{NA}	{GO:0055114; oxidation-reduction process; biological_process GO:0020037; heme binding; molecular_function GO:0006979; response to oxidative stress; biological_process GO:0004601; Peroxidase activity; molecular_function}	{GU228491.1; Suaeda salsa stroma Ascorbate peroxidase precursor, mRNA, complete cds; chloroplast}	{PF00141:Peroxidase}
transcript_HQ_BAB_transcript18384/f3p0/1634	0.26166	4.2666e-09	1.6328e-08	{XP_010677101.1; PREDICTED: nudix hydrolase 8 [Beta vulgaris subsp. vulgaris]}	{sp|Q8L7W2|NUDT8_ARATH; Nudix hydrolase 8 OS=Arabidopsis thaliana GN=NUDT8 PE=2 SV=2}	{bvg:104892794; - - - - -}	{At5g47240; KOG0648 Predicted NUDIX hydrolase FGF-2 and related proteins T Signal transduction mechanisms ;}	{GO:0055114; oxidation-reduction process; biological_process GO:0004784; Superoxide dismutase activity; molecular_function GO:0006801; superoxide metabolic process; biological_process GO:0046872; metal ion binding; molecular_function GO:0016787; hydrolase activity; molecular_function}	{XM_010678799.2; PREDICTED: Beta vulgaris subsp. vulgaris nudix hydrolase 8 (LOC104892794), mRNA}	{PF00081:Iron/manganese Superoxide dismutases, alpha-hairpin domain PF00293:NUDIX domain}
transcript_HQ_BAB_transcript17994/f3p0/1608	0.73727	4.8448e-58	7.8078e-57	{XP_006302321.1; hypothetical protein CARUB_v10020374mg [Capsella rubella]}	{sp|Q6YW46|EF1G2_ORYSJ; Elongation factor 1-gamma 2 OS=Oryza sativa subsp. japonica GN=Os02g0220500 PE=2 SV=2}	{bvg:104901036; K03233 EEF1G elongation factor 1-gamma - ko05134; Human Diseases; Infectious diseases: Bacterial; Legionellosis}	{At1g57720_2; KOG1627 Translation elongation factor EF-1 gamma J Translation, ribosomal structure and biogenesis ;}	{GO:0005515; protein binding; molecular_function GO:0006414; translational elongation; biological_process GO:0003746; translation elongation factor activity; molecular_function}	{XM_010688581.2; PREDICTED: Beta vulgaris subsp. vulgaris elongation factor 1-gamma (LOC104901036), mRNA}	{PF00647:Elongation factor 1 gamma, conserved domain PF13417:Glutathione S-transferase, N-terminal domain PF02798:Glutathione S-transferase, N-terminal domain PF13409:Glutathione S-transferase, N-terminal domain}
transcript_HQ_BAB_transcript17916/f3p0/1668	-0.2517	0.021778	0.039869	{CAA71489.1; Peroxidase [Spinacia oleracea]}	{sp|Q9FMR0|PER60_ARATH; Peroxidase 60 OS=Arabidopsis thaliana GN=PER60 PE=1 SV=1}	{pmum:103328930; K00430 E1.11.1.7 Peroxidase 1.11.1.7 ko00940; Metabolism; Biosynthesis of other secondary metabolites; Phenylpropanoid biosynthesis}	{NA}	{GO:0020037; heme binding; molecular_function GO:0055114; oxidation-reduction process; biological_process GO:0004601; Peroxidase activity; molecular_function GO:0006979; response to oxidative stress; biological_process}	{AM265608.1; Beta vulgaris mRNA for cationic Peroxidase (cprx1 gene)}	{PF00141:Peroxidase}
transcript_HQ_BAB_transcript15377/f60p0/1888	-0.30702	1.3673e-17	8.1975e-17	{AAK67359.2; catalase [Suaeda salsa]}	{sp|P17598|CATA1_GOSHI; Catalase isozyme 1 OS=Gossypium hirsutum GN=CAT1 PE=2 SV=2}	{gra:105783611; K03781 katE, CAT, catB, srpA catalase 1.11.1.6 ko01200; Metabolism; Global and overview maps; Carbon metabolism | ko00630; Metabolism; Carbohydrate metabolism; Glyoxylate and dicarboxylate metabolism | ko00380; Metabolism; Amino acid metabolism; Tryptophan metabolism | ko04016; Environmental Information Processing; Signal transduction; MAPK signaling pathway - plant | ko04011; Env…	{At4g35090; KOG0047 Catalase P Inorganic ion transport and metabolism ;}	{GO:0055114; oxidation-reduction process; biological_process GO:0030345; structural constituent of tooth enamel; molecular_function GO:0020037; heme binding; molecular_function GO:0042475; odontogenesis of dentine-containing tooth; biological_process GO:0004096; catalase activity; molecular_function}	{KJ690269.1; Bassia scoparia CAT1 mRNA, complete cds}	{PF05111:Ameloblastin precursor (Amelin) PF00199:Catalase}
transcript_HQ_BAB_transcript14632/f14p0/1980	0.11561	0.001482	0.0033194	{KNA20548.1; hypothetical protein SOVF_051350 [Spinacia oleracea]}	{sp|P25819|CATA2_ARATH; Catalase-2 OS=Arabidopsis thaliana GN=CAT2 PE=2 SV=3}	{cann:107859787; - - - - -}	{At4g35090; KOG0047 Catalase P Inorganic ion transport and metabolism ;}	{GO:0004096; catalase activity; molecular_function GO:0055114; oxidation-reduction process; biological_process GO:0020037; heme binding; molecular_function}	{XM_010694242.2; PREDICTED: Beta vulgaris subsp. vulgaris catalase (LOC104905646), mRNA}	{PF00199:Catalase}
transcript_HQ_BAB_transcript14336/f4p0/2070	-0.97521	2.6148e-70	5.1679e-69	{KNA06708.1; hypothetical protein SOVF_178510 [Spinacia oleracea]}	{sp|Q43154|GSHRP_SPIOL; Glutathione reductase, chloroplastic (Fragment) OS=Spinacia oleracea PE=2 SV=1}	{vra:106770425; K00383 GSR, gor glutathione reductase (NADPH) 1.8.1.7 ko00480; Metabolism; Metabolism of other amino acids; Glutathione metabolism | ko04918; Organismal Systems; Endocrine system; Thyroid hormone synthesis}	{At3g24170; KOG0405 Pyridine nucleotide-disulphide oxidoreductase Q Secondary metabolites biosynthesis, transport and catabolism ;}	{GO:0016491; oxidoreductase activity; molecular_function GO:0008033; tRNA processing; biological_process GO:0045454; cell redox homeostasis; biological_process GO:0050660; flavin adenine dinucleotide binding; molecular_function GO:0055114; oxidation-reduction process; biological_process}	{XM_010695660.2; PREDICTED: Beta vulgaris subsp. vulgaris glutathione reductase, chloroplastic (LOC104906832), mRNA}	{PF00070:Pyridine nucleotide-disulphide oxidoreductase PF07992:Pyridine nucleotide-disulphide oxidoreductase PF12831:FAD dependent oxidoreductase PF01593:Flavin containing amine oxidoreductase PF01134:Glucose inhibited division protein A PF01266:FAD dependent oxidoreductase PF02852:Pyridine nucleotide-disulphide oxidoreductase, dimerisation domain}
transcript_HQ_BAB_transcript13741/f2p0/2089	0.39947	6.1646e-05	0.00016468	{KNA23564.1; hypothetical protein SOVF_023710 isoform A [Spinacia oleracea]}	{sp|O80763|NRX1_ARATH; Probable nucleoredoxin 1 OS=Arabidopsis thaliana GN=At1g60420 PE=1 SV=1}	{vvi:100852822; K17609 NXN nucleoredoxin 1.8.1.8 -}	{At1g60420; KOG2501 Thioredoxin, nucleoredoxin and related proteins R General function prediction only ;}	{GO:0031072; heat shock protein binding; molecular_function GO:0004602; glutathione Peroxidase activity; molecular_function GO:0051539; 4 iron, 4 sulfur cluster binding; molecular_function GO:0035556; intracellular signal transduction; biological_process GO:0009055; NA GO:0055114; oxidation-reduction process; biological_process GO:0045454; cell redox homeostasis; biological_process GO:0015035; pr…	{XM_010684244.2; PREDICTED: Beta vulgaris subsp. vulgaris probable nucleoredoxin 1 (LOC104897381), mRNA}	{PF00462:Glutaredoxin PF00578:AhpC/TSA family PF00255:Glutathione Peroxidase PF00660:Seripauperin and TIP1 family PF08534:Redoxin PF00684:DnaJ central domain PF10589:NADH-ubiquinone oxidoreductase-F iron-sulfur binding region PF00085:Thioredoxin PF00130:Phorbol esters/diacylglycerol binding domain (C1 domain)}

## Sheet: LB vs. HB
Table S4 DEGs related to ROS in Haloxylon persicum
Gene_id	log2FoldChange	pval	padj	{nr}	{SwissProt}	{KEGG}	{KOG}	{GO}	{nt}	{pfam}
transcript_HQ_BAB_transcript20282/f2p0/1118	8.9732	3.1446e-277	2.4699e-275	{XP_010689420.1; PREDICTED: L-ascorbate Peroxidase, cytosolic [Beta vulgaris subsp. vulgaris]}	{sp|P48534|APX1_PEA; L-ascorbate Peroxidase, cytosolic OS=Pisum sativum GN=APX1 PE=1 SV=2}	{pda:103702852; K00434 E1.11.1.11 L-ascorbate Peroxidase 1.11.1.11 ko00053; Metabolism; Carbohydrate metabolism; Ascorbate and aldarate metabolism | ko00480; Metabolism; Metabolism of other amino acids; Glutathione metabolism}	{NA}	{GO:0020037; heme binding; molecular_function GO:0055114; oxidation-reduction process; biological_process GO:0004601; Peroxidase activity; molecular_function GO:0006979; response to oxidative stress; biological_process}	{XM_010691118.2; PREDICTED: Beta vulgaris subsp. vulgaris L-ascorbate Peroxidase, cytosolic (LOC104903122), mRNA}	{PF00141:Peroxidase}
transcript_HQ_BAB_transcript20191/f4p0/1163	10.688	9.8608e-254	6.0019e-252	{XP_010679902.1; PREDICTED: L-ascorbate Peroxidase 3, peroxisomal [Beta vulgaris subsp. vulgaris]}	{sp|Q42564|APX3_ARATH; L-ascorbate Peroxidase 3, peroxisomal OS=Arabidopsis thaliana GN=APX3 PE=1 SV=1}	{vra:106756337; K00434 E1.11.1.11 L-ascorbate Peroxidase 1.11.1.11 ko00053; Metabolism; Carbohydrate metabolism; Ascorbate and aldarate metabolism | ko00480; Metabolism; Metabolism of other amino acids; Glutathione metabolism}	{NA}	{GO:0020037; heme binding; molecular_function GO:0055114; oxidation-reduction process; biological_process GO:0006979; response to oxidative stress; biological_process GO:0004601; Peroxidase activity; molecular_function}	{XM_010681600.2; PREDICTED: Beta vulgaris subsp. vulgaris L-ascorbate Peroxidase 3, peroxisomal (LOC104895170), mRNA}	{PF00141:Peroxidase}
transcript_HQ_SAB_transcript9201/f2p0/2369	2.7965	6.0733e-06	1.2169e-05	{KNA20860.1; hypothetical protein SOVF_048160 [Spinacia oleracea]}	{sp|Q9CPU4|MGST3_MOUSE; Microsomal Glutathione S-transferase 3 OS=Mus musculus GN=Mgst3 PE=1 SV=1}	{bvg:104891240; K00799 GST, gst Glutathione S-transferase 2.5.1.18 ko00480; Metabolism; Metabolism of other amino acids; Glutathione metabolism | ko00980; Metabolism; Xenobiotics biodegradation and metabolism; Metabolism of xenobiotics by cytochrome P450 | ko00982; Metabolism; Xenobiotics biodegradation and metabolism; Drug metabolism - cytochrome P450 | ko05204; Human Diseases; Cancers: Overview…	{NA}	{NA}	{XM_010676902.2; PREDICTED: Beta vulgaris subsp. vulgaris microsomal Glutathione S-transferase 3 (LOC104891240), mRNA}	{NA}
transcript_HQ_SAB_transcript6953/f2p0/2628	4.8409	7.0276e-07	1.4976e-06	{KNA08419.1; hypothetical protein SOVF_162770 [Spinacia oleracea]}	{sp|Q948T9|RBOHB_SOLTU; Respiratory burst oxidase homolog protein B OS=Solanum tuberosum GN=RBOHB PE=1 SV=1}	{bvg:104890306; K13447 RBOH respiratory burst oxidase [EC:1.6.3.- 1.11.1.-] 1.6.3.-,1.11.1.- ko04016; Environmental Information Processing; Signal transduction; MAPK signaling pathway - plant | ko04626; Organismal Systems; Environmental adaptation; Plant-pathogen interaction}	{At5g51060; KOG0039 Ferric reductase, NADH/NADPH oxidase and related proteins PQ Inorganic ion transport and metabolism ; Secondary metabolites biosynthesis, transport and catabolism ;}	{GO:0006338; chromatin remodeling; biological_process GO:0016514; SWI/SNF complex; cellular_component GO:0055114; oxidation-reduction process; biological_process GO:0005634; nucleus; cellular_component GO:0016586; RSC complex; cellular_component GO:0050664; oxidoreductase activity, acting on NADH or NADPH, oxygen as acceptor; molecular_function GO:0004601; Peroxidase activity; molecular_function}	{NA}	{PF08414:Respiratory burst NADPH oxidase PF09510:Rtt102p-like transcription regulator protein}
transcript_HQ_SAB_transcript31813/f3p0/658	-0.80014	1.7218e-08	4.0334e-08	{KMT10612.1; hypothetical protein BVRB_5g117320 [Beta vulgaris subsp. vulgaris]}	{sp|Q8L8T2|GRXC1_ARATH; Glutaredoxin-C1 OS=Arabidopsis thaliana GN=GRXC1 PE=2 SV=2}	{bvg:104894295; K03676 grxC, GLRX, GLRX2 glutaredoxin 3 - -}	{At5g63030; KOG1752 Glutaredoxin and related proteins O Posttranslational modification, protein turnover, chaperones ;}	{GO:0045454; cell redox homeostasis; biological_process GO:0006412; translation; biological_process GO:0005515; protein binding; molecular_function GO:0003735; structural constituent of ribosome; molecular_function GO:0015035; protein disulfide oxidoreductase activity; molecular_function GO:0009055; NA}	{XM_010680493.2; PREDICTED: Beta vulgaris subsp. vulgaris glutaredoxin (LOC104894295), mRNA}	{PF13409:Glutathione S-transferase, N-terminal domain PF13417:Glutathione S-transferase, N-terminal domain PF00542:Ribosomal protein L7/L12 C-terminal domain PF00462:Glutaredoxin}
transcript_HQ_SAB_transcript30983/f4p0/741	1.4946	2.249e-05	4.3267e-05	{XP_016170182.1; PREDICTED: probable Glutathione S-transferase [Arachis ipaensis]}	{sp|Q8GYM1|GSTUM_ARATH; Glutathione S-transferase U22 OS=Arabidopsis thaliana GN=GSTU22 PE=1 SV=1}	{pop:POPTR_0001s42820g; K00799 GST, gst Glutathione S-transferase 2.5.1.18 ko00480; Metabolism; Metabolism of other amino acids; Glutathione metabolism | ko00980; Metabolism; Xenobiotics biodegradation and metabolism; Metabolism of xenobiotics by cytochrome P450 | ko00982; Metabolism; Xenobiotics biodegradation and metabolism; Drug metabolism - cytochrome P450 | ko05204; Human Diseases; Cancers: …	{At1g78340; KOG0406 Glutathione S-transferase O Posttranslational modification, protein turnover, chaperones ;}	{GO:0005515; protein binding; molecular_function}	{XM_002518138.2; PREDICTED: Ricinus communis probable Glutathione S-transferase (LOC8265677), mRNA}	{PF13417:Glutathione S-transferase, N-terminal domain PF13409:Glutathione S-transferase, N-terminal domain PF02798:Glutathione S-transferase, N-terminal domain}
transcript_HQ_SAB_transcript30754/f5p0/798	-1.1946	1.0381e-15	3.33e-15	{XP_010668258.1; PREDICTED: probable Glutathione S-transferase parC [Beta vulgaris subsp. vulgaris]}	{sp|Q03666|GSTX4_TOBAC; Probable Glutathione S-transferase OS=Nicotiana tabacum PE=2 SV=1}	{rcu:8278055; K00799 GST, gst Glutathione S-transferase 2.5.1.18 ko00480; Metabolism; Metabolism of other amino acids; Glutathione metabolism | ko00980; Metabolism; Xenobiotics biodegradation and metabolism; Metabolism of xenobiotics by cytochrome P450 | ko00982; Metabolism; Xenobiotics biodegradation and metabolism; Drug metabolism - cytochrome P450 | ko05204; Human Diseases; Cancers: Overview; …	{At1g17180; KOG0406 Glutathione S-transferase O Posttranslational modification, protein turnover, chaperones ;}	{GO:0015643; toxin binding; molecular_function GO:0005515; protein binding; molecular_function}	{NA}	{PF13409:Glutathione S-transferase, N-terminal domain PF13417:Glutathione S-transferase, N-terminal domain PF01320:Colicin immunity protein / pyocin immunity protein PF02798:Glutathione S-transferase, N-terminal domain}
transcript_HQ_SAB_transcript30185/f4p0/853	1.3241	5.9202e-18	2.0492e-17	{XP_010675204.1; PREDICTED: microsomal Glutathione S-transferase 3 [Beta vulgaris subsp. vulgaris]}	{sp|Q9CPU4|MGST3_MOUSE; Microsomal Glutathione S-transferase 3 OS=Mus musculus GN=Mgst3 PE=1 SV=1}	{bvg:104891240; K00799 GST, gst Glutathione S-transferase 2.5.1.18 ko00480; Metabolism; Metabolism of other amino acids; Glutathione metabolism | ko00980; Metabolism; Xenobiotics biodegradation and metabolism; Metabolism of xenobiotics by cytochrome P450 | ko00982; Metabolism; Xenobiotics biodegradation and metabolism; Drug metabolism - cytochrome P450 | ko05204; Human Diseases; Cancers: Overview…	{NA}	{NA}	{XM_010676902.2; PREDICTED: Beta vulgaris subsp. vulgaris microsomal Glutathione S-transferase 3 (LOC104891240), mRNA}	{NA}
transcript_HQ_SAB_transcript29854/f4p0/835	3.6815	2.8861e-26	1.2883e-25	{AFD50704.1; Cu/Zn Superoxide dismutase [Suaeda salsa]}	{sp|P22233|SODC_SPIOL; Superoxide dismutase [Cu-Zn] OS=Spinacia oleracea GN=SODCC PE=2 SV=1}	{bvg:104891015; K04565 SOD1 Superoxide dismutase, Cu-Zn family 1.15.1.1 ko04146; Cellular Processes; Transport and catabolism; Peroxisome | ko04213; Organismal Systems; Aging; Longevity regulating pathway - multiple species | ko05014; Human Diseases; Neurodegenerative diseases; Amyotrophic lateral sclerosis (ALS) | ko05016; Human Diseases; Neurodegenerative diseases; Huntington's disease | ko0502…	{At1g08830; KOG0441 Cu2+/Zn2+ Superoxide dismutase SOD1 P Inorganic ion transport and metabolism ;}	{GO:0055114; oxidation-reduction process; biological_process GO:0046872; metal ion binding; molecular_function GO:0006801; superoxide metabolic process; biological_process}	{XM_010676649.1; PREDICTED: Beta vulgaris subsp. vulgaris Superoxide dismutase [Cu-Zn] (LOC104891015), transcript variant X1, mRNA}	{PF00080:Copper/zinc Superoxide dismutase (SODC)}
transcript_HQ_SAB_transcript29253/f4p0/934	1.3678	6.1981e-22	2.4292e-21	{AEY76087.1; peroxiredoxin Q [Haloxylon ammodendron]}	{sp|Q6UBI3|PERQ_SUASA; Peroxiredoxin Q, chloroplastic OS=Suaeda salsa GN=PRXQ PE=1 SV=1}	{egr:104436389; K03564 BCP, PRXQ, DOT5 peroxiredoxin Q/BCP 1.11.1.15 -}	{At3g26060; KOG0855 Alkyl hydroperoxide reductase, thiol specific antioxidant and related enzymes O Posttranslational modification, protein turnover, chaperones ;}	{GO:0016209; NA GO:0004602; glutathione Peroxidase activity; molecular_function GO:0055114; oxidation-reduction process; biological_process GO:0006979; response to oxidative stress; biological_process GO:0016491; oxidoreductase activity; molecular_function}	{JN657416.2; Haloxylon ammodendron peroxiredoxin Q (PrXQ) mRNA, complete cds}	{PF00578:AhpC/TSA family PF08534:Redoxin PF00255:Glutathione Peroxidase}
transcript_HQ_SAB_transcript29061/f18p0/946	2.9018	1.4557e-100	2.1995e-99	{XP_010683301.2; PREDICTED: pentatricopeptide repeat-containing protein At1g05670, mitochondrial [Beta vulgaris subsp. vulgaris]}	{sp|Q9FUS8|GSTUH_ARATH; Glutathione S-transferase U17 OS=Arabidopsis thaliana GN=GSTU17 PE=2 SV=1}	{vvi:100245065; K00799 GST, gst Glutathione S-transferase 2.5.1.18 ko00480; Metabolism; Metabolism of other amino acids; Glutathione metabolism | ko00980; Metabolism; Xenobiotics biodegradation and metabolism; Metabolism of xenobiotics by cytochrome P450 | ko00982; Metabolism; Xenobiotics biodegradation and metabolism; Drug metabolism - cytochrome P450 | ko05204; Human Diseases; Cancers: Overview…	{At1g10360; KOG0406 Glutathione S-transferase O Posttranslational modification, protein turnover, chaperones ;}	{GO:0005515; protein binding; molecular_function}	{EF373062.1; Salicornia brachiata Glutathione S-transferase mRNA, complete cds}	{PF13409:Glutathione S-transferase, N-terminal domain PF13417:Glutathione S-transferase, N-terminal domain PF02798:Glutathione S-transferase, N-terminal domain}
transcript_HQ_SAB_transcript29015/f3p0/970	-1.5251	1.1918e-31	6.1235e-31	{AFD50704.1; Cu/Zn Superoxide dismutase [Suaeda salsa]}	{sp|P22233|SODC_SPIOL; Superoxide dismutase [Cu-Zn] OS=Spinacia oleracea GN=SODCC PE=2 SV=1}	{bvg:104891015; K04565 SOD1 Superoxide dismutase, Cu-Zn family 1.15.1.1 ko04146; Cellular Processes; Transport and catabolism; Peroxisome | ko04213; Organismal Systems; Aging; Longevity regulating pathway - multiple species | ko05014; Human Diseases; Neurodegenerative diseases; Amyotrophic lateral sclerosis (ALS) | ko05016; Human Diseases; Neurodegenerative diseases; Huntington's disease | ko0502…	{At1g08830; KOG0441 Cu2+/Zn2+ Superoxide dismutase SOD1 P Inorganic ion transport and metabolism ;}	{GO:0046872; metal ion binding; molecular_function GO:0055114; oxidation-reduction process; biological_process GO:0006801; superoxide metabolic process; biological_process}	{XM_010676649.1; PREDICTED: Beta vulgaris subsp. vulgaris Superoxide dismutase [Cu-Zn] (LOC104891015), transcript variant X1, mRNA}	{PF00080:Copper/zinc Superoxide dismutase (SODC)}
transcript_HQ_SAB_transcript28915/f4p0/985	-0.52469	0.008061	0.012279	{KNA11546.1; hypothetical protein SOVF_134140 [Spinacia oleracea]}	{sp|Q04522|GSTF_SILVU; Glutathione S-transferase OS=Silene vulgaris GN=GST PE=1 SV=3}	{nnu:104599001; K00799 GST, gst Glutathione S-transferase 2.5.1.18 ko00480; Metabolism; Metabolism of other amino acids; Glutathione metabolism | ko00980; Metabolism; Xenobiotics biodegradation and metabolism; Metabolism of xenobiotics by cytochrome P450 | ko00982; Metabolism; Xenobiotics biodegradation and metabolism; Drug metabolism - cytochrome P450 | ko05204; Human Diseases; Cancers: Overview…	{At2g47730; KOG0867 Glutathione S-transferase O Posttranslational modification, protein turnover, chaperones ;}	{GO:0009055; NA GO:0015035; protein disulfide oxidoreductase activity; molecular_function GO:0005515; protein binding; molecular_function GO:0045454; cell redox homeostasis; biological_process}	{NA}	{PF13409:Glutathione S-transferase, N-terminal domain PF13417:Glutathione S-transferase, N-terminal domain PF00462:Glutaredoxin PF02798:Glutathione S-transferase, N-terminal domain}
transcript_HQ_SAB_transcript28810/f2p0/1002	-2.054	7.3328e-28	3.4182e-27	{XP_012086925.1; PREDICTED: Glutathione S-transferase T1-like [Jatropha curcas]}	{sp|Q9ZRT5|GSTT1_ARATH; Glutathione S-transferase T1 OS=Arabidopsis thaliana GN=GSTT1 PE=2 SV=1}	{jcu:105635682; K00799 GST, gst Glutathione S-transferase 2.5.1.18 ko00480; Metabolism; Metabolism of other amino acids; Glutathione metabolism | ko00980; Metabolism; Xenobiotics biodegradation and metabolism; Metabolism of xenobiotics by cytochrome P450 | ko00982; Metabolism; Xenobiotics biodegradation and metabolism; Drug metabolism - cytochrome P450 | ko05204; Human Diseases; Cancers: Overview…	{At5g41210; KOG0867 Glutathione S-transferase O Posttranslational modification, protein turnover, chaperones ;}	{GO:0005515; protein binding; molecular_function}	{XM_012231537.1; PREDICTED: Jatropha curcas Glutathione S-transferase T1-like (LOC105645824), mRNA}	{PF02798:Glutathione S-transferase, N-terminal domain PF13409:Glutathione S-transferase, N-terminal domain PF13417:Glutathione S-transferase, N-terminal domain}
transcript_HQ_SAB_transcript28720/f3p0/992	1.2777	1.4252e-18	5.0244e-18	{XP_012086925.1; PREDICTED: Glutathione S-transferase T1-like [Jatropha curcas]}	{sp|Q9ZRT5|GSTT1_ARATH; Glutathione S-transferase T1 OS=Arabidopsis thaliana GN=GSTT1 PE=2 SV=1}	{jcu:105635682; K00799 GST, gst Glutathione S-transferase 2.5.1.18 ko00480; Metabolism; Metabolism of other amino acids; Glutathione metabolism | ko00980; Metabolism; Xenobiotics biodegradation and metabolism; Metabolism of xenobiotics by cytochrome P450 | ko00982; Metabolism; Xenobiotics biodegradation and metabolism; Drug metabolism - cytochrome P450 | ko05204; Human Diseases; Cancers: Overview…	{At5g41210; KOG0867 Glutathione S-transferase O Posttranslational modification, protein turnover, chaperones ;}	{GO:0005515; protein binding; molecular_function}	{XM_012231537.1; PREDICTED: Jatropha curcas Glutathione S-transferase T1-like (LOC105645824), mRNA}	{PF13417:Glutathione S-transferase, N-terminal domain PF13409:Glutathione S-transferase, N-terminal domain PF02798:Glutathione S-transferase, N-terminal domain}
transcript_HQ_SAB_transcript28417/f3p0/1021	-0.97962	1.3832e-12	3.9417e-12	{AFD50703.1; manganese Superoxide dismutase [Salicornia europaea]}	{sp|Q9SM64|SODM_PRUPE; Superoxide dismutase [Mn], mitochondrial OS=Prunus persica GN=SOD PE=2 SV=1}	{bvg:104887645; K04564 SOD2 Superoxide dismutase, Fe-Mn family 1.15.1.1 ko04013; Environmental Information Processing; Signal transduction; MAPK signaling pathway - fly | ko04068; Environmental Information Processing; Signal transduction; FoxO signaling pathway | ko04146; Cellular Processes; Transport and catabolism; Peroxisome | ko04211; Organismal Systems; Aging; Longevity regulating pathway | …	{At3g10920; KOG0876 Manganese Superoxide dismutase P Inorganic ion transport and metabolism ;}	{GO:0046872; metal ion binding; molecular_function GO:0006801; superoxide metabolic process; biological_process GO:0055114; oxidation-reduction process; biological_process GO:0004784; Superoxide dismutase activity; molecular_function}	{JQ061158.1; Salicornia europaea manganese Superoxide dismutase (MnSOD) mRNA, complete cds}	{PF00081:Iron/manganese Superoxide dismutases, alpha-hairpin domain PF02777:Iron/manganese Superoxide dismutases, C-terminal domain}
transcript_HQ_SAB_transcript28255/f11p0/1028	2.3148	3.1375e-83	3.897e-82	{KNA11546.1; hypothetical protein SOVF_134140 [Spinacia oleracea]}	{sp|Q04522|GSTF_SILVU; Glutathione S-transferase OS=Silene vulgaris GN=GST PE=1 SV=3}	{nnu:104599001; K00799 GST, gst Glutathione S-transferase 2.5.1.18 ko00480; Metabolism; Metabolism of other amino acids; Glutathione metabolism | ko00980; Metabolism; Xenobiotics biodegradation and metabolism; Metabolism of xenobiotics by cytochrome P450 | ko00982; Metabolism; Xenobiotics biodegradation and metabolism; Drug metabolism - cytochrome P450 | ko05204; Human Diseases; Cancers: Overview…	{At2g47730; KOG0867 Glutathione S-transferase O Posttranslational modification, protein turnover, chaperones ;}	{GO:0005515; protein binding; molecular_function}	{XM_010667483.2; PREDICTED: Beta vulgaris subsp. vulgaris Glutathione S-transferase (LOC104883042), mRNA}	{PF13409:Glutathione S-transferase, N-terminal domain PF13417:Glutathione S-transferase, N-terminal domain PF02798:Glutathione S-transferase, N-terminal domain}
transcript_HQ_SAB_transcript28233/f2p0/1055	-1.0659	3.3297e-09	8.1084e-09	{KNA10049.1; hypothetical protein SOVF_147980 [Spinacia oleracea]}	{sp|Q9ZRT5|GSTT1_ARATH; Glutathione S-transferase T1 OS=Arabidopsis thaliana GN=GSTT1 PE=2 SV=1}	{bvg:104892287; K00799 GST, gst Glutathione S-transferase 2.5.1.18 ko00480; Metabolism; Metabolism of other amino acids; Glutathione metabolism | ko00980; Metabolism; Xenobiotics biodegradation and metabolism; Metabolism of xenobiotics by cytochrome P450 | ko00982; Metabolism; Xenobiotics biodegradation and metabolism; Drug metabolism - cytochrome P450 | ko05204; Human Diseases; Cancers: Overview…	{At5g41210; KOG0867 Glutathione S-transferase O Posttranslational modification, protein turnover, chaperones ;}	{GO:0005515; protein binding; molecular_function}	{XM_010678171.2; PREDICTED: Beta vulgaris subsp. vulgaris Glutathione S-transferase T1 (LOC104892287), mRNA}	{PF02798:Glutathione S-transferase, N-terminal domain PF13409:Glutathione S-transferase, N-terminal domain PF13417:Glutathione S-transferase, N-terminal domain}
transcript_HQ_SAB_transcript28195/f17p0/985	0.574	1.2284e-05	2.4086e-05	{BAJ33626.1; unnamed protein product [Eutrema halophilum]}	{sp|O48646|GPX6_ARATH; Probable phospholipid hydroperoxide glutathione Peroxidase 6, mitochondrial OS=Arabidopsis thaliana GN=GPX6 PE=2 SV=2}	{eus:EUTSA_v10028932mg; K00432 gpx glutathione Peroxidase 1.11.1.9 ko00590; Metabolism; Lipid metabolism; Arachidonic acid metabolism | ko00480; Metabolism; Metabolism of other amino acids; Glutathione metabolism | ko04918; Organismal Systems; Endocrine system; Thyroid hormone synthesis}	{At4g11600; KOG1651 Glutathione Peroxidase O Posttranslational modification, protein turnover, chaperones ;}	{GO:0055114; oxidation-reduction process; biological_process GO:0006979; response to oxidative stress; biological_process GO:0016491; oxidoreductase activity; molecular_function GO:0016209; NA GO:0004602; glutathione Peroxidase activity; molecular_function}	{XM_010696872.2; PREDICTED: Beta vulgaris subsp. vulgaris probable phospholipid hydroperoxide glutathione Peroxidase (LOC104907858), mRNA}	{PF00578:AhpC/TSA family PF08534:Redoxin PF00255:Glutathione Peroxidase}
transcript_HQ_SAB_transcript28144/f12p0/1016	-1.2183	4.7958e-16	1.5562e-15	{XP_015951758.1; PREDICTED: Superoxide dismutase [Cu-Zn], chloroplastic [Arachis duranensis]}	{sp|P14831|SODCP_SOLLC; Superoxide dismutase [Cu-Zn], chloroplastic OS=Solanum lycopersicum GN=SODCP.2 PE=1 SV=1}	{adu:107476456; K04565 SOD1 Superoxide dismutase, Cu-Zn family 1.15.1.1 ko04146; Cellular Processes; Transport and catabolism; Peroxisome | ko04213; Organismal Systems; Aging; Longevity regulating pathway - multiple species | ko05014; Human Diseases; Neurodegenerative diseases; Amyotrophic lateral sclerosis (ALS) | ko05016; Human Diseases; Neurodegenerative diseases; Huntington's disease | ko0502…	{At2g28190; KOG0441 Cu2+/Zn2+ Superoxide dismutase SOD1 P Inorganic ion transport and metabolism ;}	{GO:0046872; metal ion binding; molecular_function GO:0006801; superoxide metabolic process; biological_process GO:0055114; oxidation-reduction process; biological_process}	{JQ061160.1; Salicornia europaea Cu/Zn Superoxide dismutase (Cu/ZnSOD) mRNA, complete cds}	{PF00080:Copper/zinc Superoxide dismutase (SODC)}
transcript_HQ_SAB_transcript28053/f8p0/1011	0.62422	4.0485e-06	8.2256e-06	{KNA11546.1; hypothetical protein SOVF_134140 [Spinacia oleracea]}	{sp|Q04522|GSTF_SILVU; Glutathione S-transferase OS=Silene vulgaris GN=GST PE=1 SV=3}	{nnu:104599001; K00799 GST, gst Glutathione S-transferase 2.5.1.18 ko00480; Metabolism; Metabolism of other amino acids; Glutathione metabolism | ko00980; Metabolism; Xenobiotics biodegradation and metabolism; Metabolism of xenobiotics by cytochrome P450 | ko00982; Metabolism; Xenobiotics biodegradation and metabolism; Drug metabolism - cytochrome P450 | ko05204; Human Diseases; Cancers: Overview…	{At2g47730; KOG0867 Glutathione S-transferase O Posttranslational modification, protein turnover, chaperones ;}	{GO:0015035; protein disulfide oxidoreductase activity; molecular_function GO:0009055; NA GO:0005515; protein binding; molecular_function GO:0045454; cell redox homeostasis; biological_process}	{XM_010668750.2; PREDICTED: Beta vulgaris subsp. vulgaris Glutathione S-transferase (LOC104884153), mRNA}	{PF13409:Glutathione S-transferase, N-terminal domain PF13417:Glutathione S-transferase, N-terminal domain PF02798:Glutathione S-transferase, N-terminal domain PF00462:Glutaredoxin}
transcript_HQ_SAB_transcript28008/f8p0/1047	0.80265	1.7335e-11	4.688e-11	{XP_010694823.1; PREDICTED: probable Glutathione S-transferase [Beta vulgaris subsp. vulgaris]}	{sp|Q03666|GSTX4_TOBAC; Probable Glutathione S-transferase OS=Nicotiana tabacum PE=2 SV=1}	{fve:101308356; K00799 GST, gst Glutathione S-transferase 2.5.1.18 ko00480; Metabolism; Metabolism of other amino acids; Glutathione metabolism | ko00980; Metabolism; Xenobiotics biodegradation and metabolism; Metabolism of xenobiotics by cytochrome P450 | ko00982; Metabolism; Xenobiotics biodegradation and metabolism; Drug metabolism - cytochrome P450 | ko05204; Human Diseases; Cancers: Overview…	{At1g78380; KOG0406 Glutathione S-transferase O Posttranslational modification, protein turnover, chaperones ;}	{GO:0005515; protein binding; molecular_function}	{NA}	{PF02798:Glutathione S-transferase, N-terminal domain PF13417:Glutathione S-transferase, N-terminal domain PF13409:Glutathione S-transferase, N-terminal domain}
transcript_HQ_SAB_transcript27818/f2p0/1085	-1.7099	2.1773e-27	1.0012e-26	{AAG41204.1; glutathione transferase [Suaeda maritima]}	{sp|Q9CA57|GSTUA_ARATH; Glutathione S-transferase U10 OS=Arabidopsis thaliana GN=GSTU10 PE=2 SV=1}	{bvg:104894060; K00799 GST, gst Glutathione S-transferase 2.5.1.18 ko00480; Metabolism; Metabolism of other amino acids; Glutathione metabolism | ko00980; Metabolism; Xenobiotics biodegradation and metabolism; Metabolism of xenobiotics by cytochrome P450 | ko00982; Metabolism; Xenobiotics biodegradation and metabolism; Drug metabolism - cytochrome P450 | ko05204; Human Diseases; Cancers: Overview…	{At1g74590; KOG0406 Glutathione S-transferase O Posttranslational modification, protein turnover, chaperones ;}	{GO:0005515; protein binding; molecular_function}	{NA}	{PF02798:Glutathione S-transferase, N-terminal domain PF13409:Glutathione S-transferase, N-terminal domain PF13417:Glutathione S-transferase, N-terminal domain}
transcript_HQ_SAB_transcript27612/f2p0/1103	0.54201	0.00027504	0.00048538	{XP_010670140.1; PREDICTED: Glutathione S-transferase DHAR3, chloroplastic [Beta vulgaris subsp. vulgaris]}	{sp|Q8LE52|DHAR3_ARATH; Glutathione S-transferase DHAR3, chloroplastic OS=Arabidopsis thaliana GN=DHAR3 PE=1 SV=1}	{bvg:104887241; - - - - -}	{At5g16710_1; KOG1422 Intracellular Cl- channel CLIC, contains GST domain P Inorganic ion transport and metabolism ;}	{GO:0006626; protein targeting to mitochondrion; biological_process GO:0005515; protein binding; molecular_function GO:0009055; NA GO:0015035; protein disulfide oxidoreductase activity; molecular_function GO:0045454; cell redox homeostasis; biological_process GO:0005741; mitochondrial outer membrane; cellular_component}	{AF195783.1; Spinacia oleracea dehydroascorbate reductase mRNA, complete cds; nuclear gene for chloroplast product}	{PF10568:Outer mitochondrial membrane transport complex protein PF13417:Glutathione S-transferase, N-terminal domain PF13409:Glutathione S-transferase, N-terminal domain PF02798:Glutathione S-transferase, N-terminal domain PF00462:Glutaredoxin}
transcript_HQ_SAB_transcript27532/f2p0/1100	-1.4626	1.6833e-07	3.7221e-07	{XP_010695664.1; PREDICTED: Peroxidase P7 [Beta vulgaris subsp. vulgaris]}	{sp|Q9FLC0|PER52_ARATH; Peroxidase 52 OS=Arabidopsis thaliana GN=PER52 PE=2 SV=1}	{bvg:104908267; K00430 E1.11.1.7 Peroxidase 1.11.1.7 ko00940; Metabolism; Biosynthesis of other secondary metabolites; Phenylpropanoid biosynthesis}	{NA}	{GO:0006979; response to oxidative stress; biological_process GO:0004601; Peroxidase activity; molecular_function GO:0055114; oxidation-reduction process; biological_process GO:0020037; heme binding; molecular_function}	{XM_010697362.2; PREDICTED: Beta vulgaris subsp. vulgaris Peroxidase P7 (LOC104908267), mRNA}	{PF00141:Peroxidase}
transcript_HQ_SAB_transcript27464/f4p0/1091	-0.50113	0.00012855	0.00023331	{XP_010694944.1; PREDICTED: probable Glutathione S-transferase parC [Beta vulgaris subsp. vulgaris]}	{sp|P49332|GSTXC_TOBAC; Probable Glutathione S-transferase parC OS=Nicotiana tabacum GN=PARC PE=2 SV=1}	{mdm:103445382; K00799 GST, gst Glutathione S-transferase 2.5.1.18 ko00480; Metabolism; Metabolism of other amino acids; Glutathione metabolism | ko00980; Metabolism; Xenobiotics biodegradation and metabolism; Metabolism of xenobiotics by cytochrome P450 | ko00982; Metabolism; Xenobiotics biodegradation and metabolism; Drug metabolism - cytochrome P450 | ko05204; Human Diseases; Cancers: Overview…	{At1g17180; KOG0406 Glutathione S-transferase O Posttranslational modification, protein turnover, chaperones ;}	{GO:0006626; protein targeting to mitochondrion; biological_process GO:0005515; protein binding; molecular_function GO:0005741; mitochondrial outer membrane; cellular_component}	{XM_015225297.1; PREDICTED: Solanum pennellii probable Glutathione S-transferase (LOC107024338), mRNA}	{PF10568:Outer mitochondrial membrane transport complex protein PF02798:Glutathione S-transferase, N-terminal domain PF13409:Glutathione S-transferase, N-terminal domain PF13417:Glutathione S-transferase, N-terminal domain}
transcript_HQ_SAB_transcript27374/f2p0/1106	0.50358	0.00042862	0.00074411	{KNA16848.1; hypothetical protein SOVF_085240 [Spinacia oleracea]}	{sp|P57108|GSTZ_EUPES; Glutathione S-transferase zeta class OS=Euphorbia esula PE=2 SV=1}	{nnu:104593872; K01800 maiA, GSTZ1 maleylacetoacetate isomerase 5.2.1.2 ko00350; Metabolism; Amino acid metabolism; Tyrosine metabolism | ko00643; Metabolism; Xenobiotics biodegradation and metabolism; Styrene degradation}	{At2g02390; KOG0868 Glutathione S-transferase O Posttranslational modification, protein turnover, chaperones ;}	{GO:0005515; protein binding; molecular_function}	{XM_010683882.1; PREDICTED: Beta vulgaris subsp. vulgaris Glutathione S-transferase 2-like (LOC104897074), mRNA}	{PF13417:Glutathione S-transferase, N-terminal domain PF13409:Glutathione S-transferase, N-terminal domain PF02798:Glutathione S-transferase, N-terminal domain}
transcript_HQ_SAB_transcript27343/f4p0/1067	-1.5918	3.1742e-09	7.735e-09	{XP_010667053.1; PREDICTED: Glutathione S-transferase [Beta vulgaris subsp. vulgaris]}	{sp|P30109|GSTF1_TOBAC; Glutathione S-transferase PARB OS=Nicotiana tabacum GN=PARB PE=2 SV=1}	{nnu:104598999; K00799 GST, gst Glutathione S-transferase 2.5.1.18 ko00480; Metabolism; Metabolism of other amino acids; Glutathione metabolism | ko00980; Metabolism; Xenobiotics biodegradation and metabolism; Metabolism of xenobiotics by cytochrome P450 | ko00982; Metabolism; Xenobiotics biodegradation and metabolism; Drug metabolism - cytochrome P450 | ko05204; Human Diseases; Cancers: Overview…	{At2g47730; KOG0867 Glutathione S-transferase O Posttranslational modification, protein turnover, chaperones ;}	{GO:0005515; protein binding; molecular_function}	{XM_010668751.2; PREDICTED: Beta vulgaris subsp. vulgaris Glutathione S-transferase (LOC104884154), mRNA}	{PF13417:Glutathione S-transferase, N-terminal domain PF13409:Glutathione S-transferase, N-terminal domain PF02798:Glutathione S-transferase, N-terminal domain}
transcript_HQ_SAB_transcript2733/f3p0/3380	8.9024	0	0	{KNA08419.1; hypothetical protein SOVF_162770 [Spinacia oleracea]}	{sp|Q948T9|RBOHB_SOLTU; Respiratory burst oxidase homolog protein B OS=Solanum tuberosum GN=RBOHB PE=1 SV=1}	{bvg:104890306; K13447 RBOH respiratory burst oxidase [EC:1.6.3.- 1.11.1.-] 1.6.3.-,1.11.1.- ko04016; Environmental Information Processing; Signal transduction; MAPK signaling pathway - plant | ko04626; Organismal Systems; Environmental adaptation; Plant-pathogen interaction}	{At5g47910; KOG0039 Ferric reductase, NADH/NADPH oxidase and related proteins PQ Inorganic ion transport and metabolism ; Secondary metabolites biosynthesis, transport and catabolism ;}	{GO:0006338; chromatin remodeling; biological_process GO:0005509; calcium ion binding; molecular_function GO:0006779; porphyrin biosynthetic process; biological_process GO:0035307; positive regulation of protein dephosphorylation; biological_process GO:0050664; oxidoreductase activity, acting on NADH or NADPH, oxygen as acceptor; molecular_function GO:0016514; SWI/SNF complex; cellular_component …	{XM_010675737.2; PREDICTED: Beta vulgaris subsp. vulgaris respiratory burst oxidase homolog protein B (LOC104890306), mRNA}	{PF08414:Respiratory burst NADPH oxidase PF13202:EF hand PF10414:Sirohaem synthase dimerisation region PF13405:EF-hand domain PF13499:EF-hand domain pair PF09510:Rtt102p-like transcription regulator protein PF00036:EF hand PF09771:Transmembrane protein 188}
transcript_HQ_SAB_transcript27305/f2p0/1120	4.1877	4.1945e-179	1.3395e-177	{XP_010693136.1; PREDICTED: Glutathione S-transferase DHAR2 [Beta vulgaris subsp. vulgaris]}	{sp|Q9FRL8|DHAR2_ARATH; Glutathione S-transferase DHAR2 OS=Arabidopsis thaliana GN=DHAR2 PE=1 SV=1}	{nta:107777254; - - - - -}	{At1g75270; KOG1422 Intracellular Cl- channel CLIC, contains GST domain P Inorganic ion transport and metabolism ;}	{GO:0005515; protein binding; molecular_function GO:0006626; protein targeting to mitochondrion; biological_process GO:0015035; protein disulfide oxidoreductase activity; molecular_function GO:0009055; NA GO:0045454; cell redox homeostasis; biological_process GO:0005741; mitochondrial outer membrane; cellular_component}	{XM_010694834.2; PREDICTED: Beta vulgaris subsp. vulgaris Glutathione S-transferase DHAR2 (LOC104906117), mRNA}	{PF10568:Outer mitochondrial membrane transport complex protein PF00462:Glutaredoxin PF02798:Glutathione S-transferase, N-terminal domain PF13417:Glutathione S-transferase, N-terminal domain PF13409:Glutathione S-transferase, N-terminal domain}
transcript_HQ_SAB_transcript27257/f2p0/1126	1.3167	2.0212e-19	7.3489e-19	{XP_010687114.1; PREDICTED: protein LSD1 isoform X2 [Beta vulgaris subsp. vulgaris]}	{sp|P94077|LSD1_ARATH; Protein LSD1 OS=Arabidopsis thaliana GN=LSD1 PE=1 SV=1}	{jcu:105636810; - - - - -}	{NA}	{GO:0006351; transcription, DNA-dependent; biological_process GO:0016491; oxidoreductase activity; molecular_function GO:0055114; oxidation-reduction process; biological_process}	{XM_010688814.2; PREDICTED: Beta vulgaris subsp. vulgaris protein LSD1 (LOC104901262), transcript variant X4, mRNA}	{PF03150:Di-haem cytochrome c Peroxidase PF02150:RNA polymerases M/15 Kd subunit}
transcript_HQ_SAB_transcript27051/f20p0/1109	-1.3794	1.5242e-24	6.4853e-24	{XP_010689420.1; PREDICTED: L-Ascorbate peroxidase, cytosolic [Beta vulgaris subsp. vulgaris]}	{sp|P48534|APX1_PEA; L-Ascorbate peroxidase, cytosolic OS=Pisum sativum GN=APX1 PE=1 SV=2}	{pda:103702852; K00434 E1.11.1.11 L-Ascorbate peroxidase 1.11.1.11 ko00053; Metabolism; Carbohydrate metabolism; Ascorbate and aldarate metabolism | ko00480; Metabolism; Metabolism of other amino acids; Glutathione metabolism}	{NA}	{GO:0020037; heme binding; molecular_function GO:0055114; oxidation-reduction process; biological_process GO:0006979; response to oxidative stress; biological_process GO:0004601; Peroxidase activity; molecular_function}	{AY034893.2; Suaeda salsa cytosolic Ascorbate peroxidase (APX) mRNA, complete cds}	{PF00141:Peroxidase}
transcript_HQ_SAB_transcript27036/f4p0/1137	-1.3277	3.6052e-23	1.4665e-22	{KNA18404.1; hypothetical protein SOVF_070820 [Spinacia oleracea]}	{sp|Q7XZP5|APX5_ARATH; L-Ascorbate peroxidase 5, peroxisomal OS=Arabidopsis thaliana GN=APX5 PE=1 SV=2}	{thj:104804273; K00434 E1.11.1.11 L-Ascorbate peroxidase 1.11.1.11 ko00053; Metabolism; Carbohydrate metabolism; Ascorbate and aldarate metabolism | ko00480; Metabolism; Metabolism of other amino acids; Glutathione metabolism}	{NA}	{GO:0004601; Peroxidase activity; molecular_function GO:0006979; response to oxidative stress; biological_process GO:0055114; oxidation-reduction process; biological_process GO:0020037; heme binding; molecular_function}	{D49679.1; Spinacia oleracea mRNA for Ascorbate peroxidase, complete cds}	{PF00141:Peroxidase}
transcript_HQ_SAB_transcript26440/f13p0/1156	-0.82202	9.2715e-10	2.3159e-09	{KNA18404.1; hypothetical protein SOVF_070820 [Spinacia oleracea]}	{sp|Q7XZP5|APX5_ARATH; L-Ascorbate peroxidase 5, peroxisomal OS=Arabidopsis thaliana GN=APX5 PE=1 SV=2}	{eus:EUTSA_v10025942mg; K00434 E1.11.1.11 L-Ascorbate peroxidase 1.11.1.11 ko00053; Metabolism; Carbohydrate metabolism; Ascorbate and aldarate metabolism | ko00480; Metabolism; Metabolism of other amino acids; Glutathione metabolism}	{NA}	{GO:0020037; heme binding; molecular_function GO:0004601; Peroxidase activity; molecular_function GO:0006979; response to oxidative stress; biological_process GO:0055114; oxidation-reduction process; biological_process}	{XM_019250091.1; PREDICTED: Beta vulgaris subsp. vulgaris L-Ascorbate peroxidase 5, peroxisomal-like (LOC104895169), mRNA}	{PF00141:Peroxidase}
transcript_HQ_SAB_transcript26375/f9p0/1152	1.0846	1.1953e-17	4.1009e-17	{KNA15210.1; hypothetical protein SOVF_100390, partial [Spinacia oleracea]}	{sp|Q8H8U5|IN21B_ORYSJ; Protein IN2-1 homolog B OS=Oryza sativa subsp. japonica GN=GSTZ5 PE=2 SV=1}	{nnu:104599214; K00799 GST, gst Glutathione S-transferase 2.5.1.18 ko00480; Metabolism; Metabolism of other amino acids; Glutathione metabolism | ko00980; Metabolism; Xenobiotics biodegradation and metabolism; Metabolism of xenobiotics by cytochrome P450 | ko00982; Metabolism; Xenobiotics biodegradation and metabolism; Drug metabolism - cytochrome P450 | ko05204; Human Diseases; Cancers: Overview…	{At5g02790; KOG0406 Glutathione S-transferase O Posttranslational modification, protein turnover, chaperones ;}	{GO:0005515; protein binding; molecular_function}	{XM_010693580.2; PREDICTED: Beta vulgaris subsp. vulgaris protein IN2-1 homolog B (LOC104905130), mRNA}	{PF02798:Glutathione S-transferase, N-terminal domain PF13417:Glutathione S-transferase, N-terminal domain PF13409:Glutathione S-transferase, N-terminal domain}
transcript_HQ_SAB_transcript26359/f5p0/1200	-2.6652	2.6533e-63	2.4949e-62	{XP_010245130.1; PREDICTED: probable Glutathione S-transferase parC [Nelumbo nucifera]}	{sp|Q03666|GSTX4_TOBAC; Probable Glutathione S-transferase OS=Nicotiana tabacum PE=2 SV=1}	{cam:101515160; K00799 GST, gst Glutathione S-transferase 2.5.1.18 ko00480; Metabolism; Metabolism of other amino acids; Glutathione metabolism | ko00980; Metabolism; Xenobiotics biodegradation and metabolism; Metabolism of xenobiotics by cytochrome P450 | ko00982; Metabolism; Xenobiotics biodegradation and metabolism; Drug metabolism - cytochrome P450 | ko05204; Human Diseases; Cancers: Overview…	{At1g78340; KOG0406 Glutathione S-transferase O Posttranslational modification, protein turnover, chaperones ;}	{GO:0005515; protein binding; molecular_function}	{XM_010696531.1; PREDICTED: Beta vulgaris subsp. vulgaris probable Glutathione S-transferase (LOC104907580), mRNA}	{PF02798:Glutathione S-transferase, N-terminal domain PF13409:Glutathione S-transferase, N-terminal domain PF13417:Glutathione S-transferase, N-terminal domain}
transcript_HQ_SAB_transcript26085/f6p0/1210	2.2738	3.4256e-05	6.5048e-05	{KNA11546.1; hypothetical protein SOVF_134140 [Spinacia oleracea]}	{sp|P30109|GSTF1_TOBAC; Glutathione S-transferase PARB OS=Nicotiana tabacum GN=PARB PE=2 SV=1}	{adu:107475927; K00799 GST, gst Glutathione S-transferase 2.5.1.18 ko00480; Metabolism; Metabolism of other amino acids; Glutathione metabolism | ko00980; Metabolism; Xenobiotics biodegradation and metabolism; Metabolism of xenobiotics by cytochrome P450 | ko00982; Metabolism; Xenobiotics biodegradation and metabolism; Drug metabolism - cytochrome P450 | ko05204; Human Diseases; Cancers: Overview…	{At1g02920; KOG0867 Glutathione S-transferase O Posttranslational modification, protein turnover, chaperones ;}	{GO:0005515; protein binding; molecular_function}	{NA}	{PF13417:Glutathione S-transferase, N-terminal domain PF02798:Glutathione S-transferase, N-terminal domain}
transcript_HQ_SAB_transcript25966/f10p0/1192	-1.2613	1.1493e-10	2.9988e-10	{KNA03205.1; hypothetical protein SOVF_211420 [Spinacia oleracea]}	{sp|Q9FL16|PER63_ARATH; Peroxidase 63 OS=Arabidopsis thaliana GN=PER63 PE=2 SV=1}	{bvg:104887004; K00430 E1.11.1.7 Peroxidase 1.11.1.7 ko00940; Metabolism; Biosynthesis of other secondary metabolites; Phenylpropanoid biosynthesis}	{NA}	{GO:0055114; oxidation-reduction process; biological_process GO:0004601; Peroxidase activity; molecular_function GO:0006979; response to oxidative stress; biological_process GO:0020037; heme binding; molecular_function}	{XM_010671582.2; PREDICTED: Beta vulgaris subsp. vulgaris Peroxidase 63 (LOC104887004), mRNA}	{PF00141:Peroxidase}
transcript_HQ_SAB_transcript25905/f39p0/1172	-1.2945	1.0354e-20	3.9159e-20	{KNA20639.1; hypothetical protein SOVF_050500 [Spinacia oleracea]}	{sp|Q42564|APX3_ARATH; L-Ascorbate peroxidase 3, peroxisomal OS=Arabidopsis thaliana GN=APX3 PE=1 SV=1}	{cmo:103490293; K00434 E1.11.1.11 L-Ascorbate peroxidase 1.11.1.11 ko00053; Metabolism; Carbohydrate metabolism; Ascorbate and aldarate metabolism | ko00480; Metabolism; Metabolism of other amino acids; Glutathione metabolism}	{NA}	{GO:0004601; Peroxidase activity; molecular_function GO:0006979; response to oxidative stress; biological_process GO:0055114; oxidation-reduction process; biological_process GO:0020037; heme binding; molecular_function}	{EU746400.1; Salicornia brachiata peroxisomal Ascorbate peroxidase mRNA, complete cds}	{PF00141:Peroxidase}
transcript_HQ_SAB_transcript25753/f3p0/1233	-2.3936	6.2866e-47	4.4414e-46	{XP_010669735.1; PREDICTED: Glutathione S-transferase L3 isoform X2 [Beta vulgaris subsp. vulgaris]}	{sp|Q8H8U5|IN21B_ORYSJ; Protein IN2-1 homolog B OS=Oryza sativa subsp. japonica GN=GSTZ5 PE=2 SV=1}	{bvg:104886900; K00799 GST, gst Glutathione S-transferase 2.5.1.18 ko00480; Metabolism; Metabolism of other amino acids; Glutathione metabolism | ko00980; Metabolism; Xenobiotics biodegradation and metabolism; Metabolism of xenobiotics by cytochrome P450 | ko00982; Metabolism; Xenobiotics biodegradation and metabolism; Drug metabolism - cytochrome P450 | ko05204; Human Diseases; Cancers: Overview…	{At3g55040; KOG0406 Glutathione S-transferase O Posttranslational modification, protein turnover, chaperones ;}	{GO:0005515; protein binding; molecular_function}	{XM_010671433.2; PREDICTED: Beta vulgaris subsp. vulgaris Glutathione S-transferase L3 (LOC104886900), transcript variant X2, mRNA}	{PF13409:Glutathione S-transferase, N-terminal domain PF13417:Glutathione S-transferase, N-terminal domain PF02798:Glutathione S-transferase, N-terminal domain}
transcript_HQ_SAB_transcript25619/f3p0/1249	-4.3521	3.5859e-34	1.9548e-33	{ADA68879.1; thylakoid Ascorbate peroxidase precursor (chloroplast) [Suaeda salsa]}	{sp|Q42592|APXS_ARATH; L-Ascorbate peroxidase S, chloroplastic/mitochondrial OS=Arabidopsis thaliana GN=APXS PE=1 SV=2}	{bvg:104891011; K00434 E1.11.1.11 L-Ascorbate peroxidase 1.11.1.11 ko00053; Metabolism; Carbohydrate metabolism; Ascorbate and aldarate metabolism | ko00480; Metabolism; Metabolism of other amino acids; Glutathione metabolism}	{NA}	{GO:0020037; heme binding; molecular_function GO:0055114; oxidation-reduction process; biological_process GO:0004601; Peroxidase activity; molecular_function GO:0006979; response to oxidative stress; biological_process}	{GU228492.1; Suaeda salsa thylakoid Ascorbate peroxidase precursor, mRNA, complete cds; chloroplast}	{PF00141:Peroxidase}
transcript_HQ_SAB_transcript25590/f2p0/1275	-0.55322	0.014575	0.021535	{XP_010678905.1; PREDICTED: Glutathione S-transferase TCHQD isoform X1 [Beta vulgaris subsp. vulgaris]}	{sp|O80662|TCHQD_ARATH; Glutathione S-transferase TCHQD OS=Arabidopsis thaliana GN=TCHQD PE=2 SV=1}	{bvg:104894380; - - - - -}	{At1g77290; KOG4420 Uncharacterized conserved protein (Ganglioside-induced differentiation associated protein 1, GDAP1) S Function unknown ;}	{GO:0005515; protein binding; molecular_function}	{XM_010680603.2; PREDICTED: Beta vulgaris subsp. vulgaris Glutathione S-transferase TCHQD (LOC104894380), transcript variant X1, mRNA}	{PF13409:Glutathione S-transferase, N-terminal domain PF13417:Glutathione S-transferase, N-terminal domain PF02798:Glutathione S-transferase, N-terminal domain}
transcript_HQ_SAB_transcript24846/f2p0/1315	-0.9694	1.0966e-12	3.1397e-12	{XP_010696372.1; PREDICTED: L-Ascorbate peroxidase 2, cytosolic-like [Beta vulgaris subsp. vulgaris]}	{sp|Q1PER6|APX2_ARATH; L-Ascorbate peroxidase 2, cytosolic OS=Arabidopsis thaliana GN=APX2 PE=2 SV=3}	{pxb:103934327; K00434 E1.11.1.11 L-Ascorbate peroxidase 1.11.1.11 ko00053; Metabolism; Carbohydrate metabolism; Ascorbate and aldarate metabolism | ko00480; Metabolism; Metabolism of other amino acids; Glutathione metabolism}	{NA}	{GO:0006979; response to oxidative stress; biological_process GO:0004601; Peroxidase activity; molecular_function GO:0055114; oxidation-reduction process; biological_process GO:0020037; heme binding; molecular_function}	{XM_010698070.2; PREDICTED: Beta vulgaris subsp. vulgaris L-Ascorbate peroxidase 2, cytosolic-like (LOC104908898), mRNA}	{PF00141:Peroxidase}
transcript_HQ_SAB_transcript24844/f2p0/1308	-2.9176	3.2928e-55	2.6912e-54	{XP_010681313.1; PREDICTED: Peroxidase 11 [Beta vulgaris subsp. vulgaris]}	{sp|Q96519|PER11_ARATH; Peroxidase 11 OS=Arabidopsis thaliana GN=PER11 PE=1 SV=1}	{vvi:100261517; K00430 E1.11.1.7 Peroxidase 1.11.1.7 ko00940; Metabolism; Biosynthesis of other secondary metabolites; Phenylpropanoid biosynthesis}	{NA}	{GO:0055114; oxidation-reduction process; biological_process GO:0006979; response to oxidative stress; biological_process GO:0004601; Peroxidase activity; molecular_function GO:0020037; heme binding; molecular_function}	{XM_010683011.2; PREDICTED: Beta vulgaris subsp. vulgaris Peroxidase 11 (LOC104896291), mRNA}	{PF00141:Peroxidase}
transcript_HQ_SAB_transcript24778/f3p0/1306	-0.30795	0.024753	0.035503	{XP_010679902.1; PREDICTED: L-Ascorbate peroxidase 3, peroxisomal [Beta vulgaris subsp. vulgaris]}	{sp|Q42564|APX3_ARATH; L-Ascorbate peroxidase 3, peroxisomal OS=Arabidopsis thaliana GN=APX3 PE=1 SV=1}	{vra:106756337; K00434 E1.11.1.11 L-Ascorbate peroxidase 1.11.1.11 ko00053; Metabolism; Carbohydrate metabolism; Ascorbate and aldarate metabolism | ko00480; Metabolism; Metabolism of other amino acids; Glutathione metabolism}	{NA}	{GO:0020037; heme binding; molecular_function GO:0055114; oxidation-reduction process; biological_process GO:0004601; Peroxidase activity; molecular_function GO:0006979; response to oxidative stress; biological_process}	{XM_010681600.2; PREDICTED: Beta vulgaris subsp. vulgaris L-Ascorbate peroxidase 3, peroxisomal (LOC104895170), mRNA}	{PF00141:Peroxidase}
transcript_HQ_SAB_transcript24636/f3p0/1310	0.45798	0.00021576	0.00038464	{XP_010693136.1; PREDICTED: Glutathione S-transferase DHAR2 [Beta vulgaris subsp. vulgaris]}	{sp|Q9FRL8|DHAR2_ARATH; Glutathione S-transferase DHAR2 OS=Arabidopsis thaliana GN=DHAR2 PE=1 SV=1}	{nta:107777254; - - - - -}	{At1g75270; KOG1422 Intracellular Cl- channel CLIC, contains GST domain P Inorganic ion transport and metabolism ;}	{GO:0005515; protein binding; molecular_function GO:0006626; protein targeting to mitochondrion; biological_process GO:0009055; NA GO:0015035; protein disulfide oxidoreductase activity; molecular_function GO:0045454; cell redox homeostasis; biological_process GO:0005741; mitochondrial outer membrane; cellular_component}	{XM_010694834.2; PREDICTED: Beta vulgaris subsp. vulgaris Glutathione S-transferase DHAR2 (LOC104906117), mRNA}	{PF10568:Outer mitochondrial membrane transport complex protein PF02798:Glutathione S-transferase, N-terminal domain PF00462:Glutaredoxin PF13409:Glutathione S-transferase, N-terminal domain PF13417:Glutathione S-transferase, N-terminal domain}
transcript_HQ_SAB_transcript24152/f2p0/1368	-0.92177	0.00013734	0.00024865	{XP_010696607.1; PREDICTED: Peroxidase 3 [Beta vulgaris subsp. vulgaris]}	{sp|O23044|PER3_ARATH; Peroxidase 3 OS=Arabidopsis thaliana GN=PER3 PE=2 SV=1}	{nta:107778977; - - - - -}	{NA}	{GO:0055114; oxidation-reduction process; biological_process GO:0004601; Peroxidase activity; molecular_function GO:0006979; response to oxidative stress; biological_process GO:0020037; heme binding; molecular_function}	{XM_010698305.2; PREDICTED: Beta vulgaris subsp. vulgaris Peroxidase 3 (LOC104909106), mRNA}	{PF00141:Peroxidase}
transcript_HQ_SAB_transcript23548/f3p0/1408	-1.498	1.3815e-05	2.6971e-05	{XP_010676616.1; PREDICTED: copper chaperone for Superoxide dismutase, chloroplastic/cytosolic [Beta vulgaris subsp. vulgaris]}	{sp|Q9LD47|CCS_ARATH; Copper chaperone for Superoxide dismutase, chloroplastic/cytosolic OS=Arabidopsis thaliana GN=CCS PE=1 SV=1}	{bvg:104892389; K04569 CCS copper chaperone for Superoxide dismutase - ko05014; Human Diseases; Neurodegenerative diseases; Amyotrophic lateral sclerosis (ALS)}	{At1g12520; KOG4656 Copper chaperone for Superoxide dismutase P Inorganic ion transport and metabolism ;}	{GO:0055114; oxidation-reduction process; biological_process GO:0046872; metal ion binding; molecular_function GO:0006801; superoxide metabolic process; biological_process GO:0030001; metal ion transport; biological_process GO:0016021; integral to membrane; cellular_component}	{XM_010678314.2; PREDICTED: Beta vulgaris subsp. vulgaris copper chaperone for Superoxide dismutase, chloroplastic/cytosolic (LOC104892389), mRNA}	{PF00080:Copper/zinc Superoxide dismutase (SODC) PF00403:Heavy-metal-associated domain PF09726:Transmembrane protein}
transcript_HQ_SAB_transcript23522/f2p0/1399	-2.0197	0.0054446	0.0084552	{XP_010678563.2; PREDICTED: Glutathione S-transferase U10-like [Beta vulgaris subsp. vulgaris]}	{sp|Q9CA57|GSTUA_ARATH; Glutathione S-transferase U10 OS=Arabidopsis thaliana GN=GSTU10 PE=2 SV=1}	{bvg:104894096; - - - - -}	{At1g74590; KOG0406 Glutathione S-transferase O Posttranslational modification, protein turnover, chaperones ;}	{GO:0009055; NA GO:0015035; protein disulfide oxidoreductase activity; molecular_function GO:0005515; protein binding; molecular_function GO:0045454; cell redox homeostasis; biological_process}	{NA}	{PF13409:Glutathione S-transferase, N-terminal domain PF13417:Glutathione S-transferase, N-terminal domain PF02798:Glutathione S-transferase, N-terminal domain PF00462:Glutaredoxin}
transcript_HQ_SAB_transcript2307/f2p0/3487	-0.27698	0.033943	0.047767	{KNA08419.1; hypothetical protein SOVF_162770 [Spinacia oleracea]}	{sp|Q948T9|RBOHB_SOLTU; Respiratory burst oxidase homolog protein B OS=Solanum tuberosum GN=RBOHB PE=1 SV=1}	{bvg:104890306; K13447 RBOH respiratory burst oxidase [EC:1.6.3.- 1.11.1.-] 1.6.3.-,1.11.1.- ko04016; Environmental Information Processing; Signal transduction; MAPK signaling pathway - plant | ko04626; Organismal Systems; Environmental adaptation; Plant-pathogen interaction}	{At5g47910; KOG0039 Ferric reductase, NADH/NADPH oxidase and related proteins PQ Inorganic ion transport and metabolism ; Secondary metabolites biosynthesis, transport and catabolism ;}	{GO:0016586; RSC complex; cellular_component GO:0071595; Nem1-Spo7 phosphatase complex; cellular_component GO:0055114; oxidation-reduction process; biological_process GO:0005634; nucleus; cellular_component GO:0004601; Peroxidase activity; molecular_function GO:0016491; oxidoreductase activity; molecular_function GO:0016514; SWI/SNF complex; cellular_component GO:0005509; calcium ion binding; mol…	{XM_010675737.2; PREDICTED: Beta vulgaris subsp. vulgaris respiratory burst oxidase homolog protein B (LOC104890306), mRNA}	{PF13202:EF hand PF10414:Sirohaem synthase dimerisation region PF08022:FAD-binding domain PF08414:Respiratory burst NADPH oxidase PF09771:Transmembrane protein 188 PF00036:EF hand PF09510:Rtt102p-like transcription regulator protein PF13499:EF-hand domain pair PF13405:EF-hand domain PF08030:Ferric reductase NAD binding domain}
transcript_HQ_SAB_transcript2282/f2p0/3516	-0.95869	0.00027025	0.00047751	{XP_010687558.1; PREDICTED: respiratory burst oxidase homolog protein E [Beta vulgaris subsp. vulgaris]}	{sp|O81211|RBOHE_ARATH; Respiratory burst oxidase homolog protein E OS=Arabidopsis thaliana GN=RBOHE PE=2 SV=2}	{egr:104436388; K13447 RBOH respiratory burst oxidase [EC:1.6.3.- 1.11.1.-] 1.6.3.-,1.11.1.- ko04016; Environmental Information Processing; Signal transduction; MAPK signaling pathway - plant | ko04626; Organismal Systems; Environmental adaptation; Plant-pathogen interaction}	{At1g19230; KOG0039 Ferric reductase, NADH/NADPH oxidase and related proteins PQ Inorganic ion transport and metabolism ; Secondary metabolites biosynthesis, transport and catabolism ;}	{GO:0055114; oxidation-reduction process; biological_process GO:0005509; calcium ion binding; molecular_function GO:0016491; oxidoreductase activity; molecular_function GO:0050664; oxidoreductase activity, acting on NADH or NADPH, oxygen as acceptor; molecular_function GO:0004601; Peroxidase activity; molecular_function GO:0071988; protein localization to spindle pole body; biological_process GO:…	{XM_010689256.2; PREDICTED: Beta vulgaris subsp. vulgaris respiratory burst oxidase homolog protein E (LOC104901666), mRNA}	{PF17060:Monopolar spindle protein 2 PF00036:EF hand PF13405:EF-hand domain PF13499:EF-hand domain pair PF08030:Ferric reductase NAD binding domain PF13202:EF hand PF08022:FAD-binding domain PF08414:Respiratory burst NADPH oxidase}
transcript_HQ_SAB_transcript21175/f2p0/1557	1.6739	1.9465e-33	1.043e-32	{XP_010685987.1; PREDICTED: Peroxidase 57 [Beta vulgaris subsp. vulgaris]}	{sp|Q9FMR0|PER60_ARATH; Peroxidase 60 OS=Arabidopsis thaliana GN=PER60 PE=1 SV=1}	{pmum:103328930; K00430 E1.11.1.7 Peroxidase 1.11.1.7 ko00940; Metabolism; Biosynthesis of other secondary metabolites; Phenylpropanoid biosynthesis}	{NA}	{GO:0055114; oxidation-reduction process; biological_process GO:0004601; Peroxidase activity; molecular_function GO:0006979; response to oxidative stress; biological_process GO:0020037; heme binding; molecular_function}	{AM265608.1; Beta vulgaris mRNA for cationic Peroxidase (cprx1 gene)}	{PF00141:Peroxidase}
transcript_HQ_SAB_transcript20802/f2p0/1580	9.1711	2.2726e-304	2.5288e-302	{XP_020096261.1; elongation factor 1-gamma 2 [Ananas comosus]}	{sp|Q9FVT2|EF1G2_ARATH; Probable elongation factor 1-gamma 2 OS=Arabidopsis thaliana GN=At1g57720 PE=1 SV=1}	{ath:AT1G57720; K03233 EEF1G elongation factor 1-gamma - ko05134; Human Diseases; Infectious diseases: Bacterial; Legionellosis}	{At1g57720_2; KOG1627 Translation elongation factor EF-1 gamma J Translation, ribosomal structure and biogenesis ;}	{GO:0005515; protein binding; molecular_function GO:0003746; translation elongation factor activity; molecular_function GO:0006414; translational elongation; biological_process}	{XM_010688581.2; PREDICTED: Beta vulgaris subsp. vulgaris elongation factor 1-gamma (LOC104901036), mRNA}	{PF00647:Elongation factor 1 gamma, conserved domain PF13409:Glutathione S-transferase, N-terminal domain PF13417:Glutathione S-transferase, N-terminal domain PF02798:Glutathione S-transferase, N-terminal domain}
transcript_HQ_SAB_transcript18947/f2p0/1691	Inf	5.945e-07	1.272e-06	{NA}	{NA}	{NA}	{NA}	{NA}	{XM_010695144.2; PREDICTED: Beta vulgaris subsp. vulgaris Peroxidase 66-like (LOC104906403), mRNA}	{NA}
transcript_HQ_SAB_transcript18400/f5p0/1718	0.98487	2.6847e-10	6.8908e-10	{XP_008452241.1; PREDICTED: elongation factor 1-gamma-like [Cucumis melo]}	{sp|Q6YW46|EF1G2_ORYSJ; Elongation factor 1-gamma 2 OS=Oryza sativa subsp. japonica GN=Os02g0220500 PE=2 SV=2}	{csv:101207459; K03233 EEF1G elongation factor 1-gamma - ko05134; Human Diseases; Infectious diseases: Bacterial; Legionellosis}	{At1g57720_1; KOG0867 Glutathione S-transferase O Posttranslational modification, protein turnover, chaperones ;}	{GO:0006414; translational elongation; biological_process GO:0005515; protein binding; molecular_function GO:0003746; translation elongation factor activity; molecular_function}	{XM_010688581.2; PREDICTED: Beta vulgaris subsp. vulgaris elongation factor 1-gamma (LOC104901036), mRNA}	{PF02798:Glutathione S-transferase, N-terminal domain PF13409:Glutathione S-transferase, N-terminal domain PF13417:Glutathione S-transferase, N-terminal domain PF00647:Elongation factor 1 gamma, conserved domain}
transcript_HQ_SAB_transcript1624/f2p0/3727	1.2282	3.4566e-18	1.2066e-17	{KNA08419.1; hypothetical protein SOVF_162770 [Spinacia oleracea]}	{sp|Q948T9|RBOHB_SOLTU; Respiratory burst oxidase homolog protein B OS=Solanum tuberosum GN=RBOHB PE=1 SV=1}	{bvg:104890306; K13447 RBOH respiratory burst oxidase [EC:1.6.3.- 1.11.1.-] 1.6.3.-,1.11.1.- ko04016; Environmental Information Processing; Signal transduction; MAPK signaling pathway - plant | ko04626; Organismal Systems; Environmental adaptation; Plant-pathogen interaction}	{At5g47910; KOG0039 Ferric reductase, NADH/NADPH oxidase and related proteins PQ Inorganic ion transport and metabolism ; Secondary metabolites biosynthesis, transport and catabolism ;}	{GO:0006338; chromatin remodeling; biological_process GO:0050664; oxidoreductase activity, acting on NADH or NADPH, oxygen as acceptor; molecular_function GO:0035307; positive regulation of protein dephosphorylation; biological_process GO:0006779; porphyrin biosynthetic process; biological_process GO:0005509; calcium ion binding; molecular_function GO:0016514; SWI/SNF complex; cellular_component …	{XM_010675737.2; PREDICTED: Beta vulgaris subsp. vulgaris respiratory burst oxidase homolog protein B (LOC104890306), mRNA}	{PF10414:Sirohaem synthase dimerisation region PF13202:EF hand PF08022:FAD-binding domain PF08414:Respiratory burst NADPH oxidase PF09771:Transmembrane protein 188 PF00036:EF hand PF09510:Rtt102p-like transcription regulator protein PF13499:EF-hand domain pair PF13405:EF-hand domain PF08030:Ferric reductase NAD binding domain}
transcript_HQ_SAB_transcript15675/f4p0/1877	-1.3383	3.873e-21	1.4836e-20	{KNA20548.1; hypothetical protein SOVF_051350 [Spinacia oleracea]}	{sp|P25819|CATA2_ARATH; Catalase-2 OS=Arabidopsis thaliana GN=CAT2 PE=2 SV=3}	{cann:107859787; - - - - -}	{At4g35090; KOG0047 Catalase P Inorganic ion transport and metabolism ;}	{GO:0055114; oxidation-reduction process; biological_process GO:0004096; catalase activity; molecular_function GO:0020037; heme binding; molecular_function}	{XM_010694242.2; PREDICTED: Beta vulgaris subsp. vulgaris catalase (LOC104905646), mRNA}	{PF00199:Catalase}
transcript_HQ_SAB_transcript15541/f5p0/1843	-2.7184	7.4194e-28	3.4578e-27	{XP_010679779.1; PREDICTED: AAA-ATPase At3g50940 [Beta vulgaris subsp. vulgaris]}	{sp|Q9FN75|AATPI_ARATH; AAA-ATPase At5g17760 OS=Arabidopsis thaliana GN=At5g17760 PE=2 SV=1}	{var:108333949; K08900 BCS1 mitochondrial chaperone BCS1 - -}	{At5g17760; KOG0743 AAA+-type ATPase O Posttranslational modification, protein turnover, chaperones ;}	{GO:0004096; catalase activity; molecular_function GO:0020037; heme binding; molecular_function GO:0005524; ATP binding; molecular_function GO:0006310; DNA recombination; biological_process GO:0055114; oxidation-reduction process; biological_process GO:0016887; ATPase activity; molecular_function GO:0009378; four-way junction helicase activity; molecular_function GO:0006281; DNA repair; biologica…	{XM_017363434.1; PREDICTED: Daucus carota subsp. sativus AAA-ATPase At3g50940-like (LOC108196242), mRNA}	{PF00004:ATPase family associated with various cellular activities (AAA) PF00199:Catalase PF07728:AAA domain (dynein-related subfamily) PF05496:Holliday junction DNA helicase ruvB N-terminus}
transcript_HQ_SAB_transcript15397/f2p0/1894	-1.1651	4.218e-15	1.3271e-14	{KNA06708.1; hypothetical protein SOVF_178510 [Spinacia oleracea]}	{sp|Q43154|GSHRP_SPIOL; Glutathione reductase, chloroplastic (Fragment) OS=Spinacia oleracea PE=2 SV=1}	{vra:106770425; K00383 GSR, gor glutathione reductase (NADPH) 1.8.1.7 ko00480; Metabolism; Metabolism of other amino acids; Glutathione metabolism | ko04918; Organismal Systems; Endocrine system; Thyroid hormone synthesis}	{At3g24170; KOG0405 Pyridine nucleotide-disulphide oxidoreductase Q Secondary metabolites biosynthesis, transport and catabolism ;}	{GO:0016491; oxidoreductase activity; molecular_function GO:0055114; oxidation-reduction process; biological_process GO:0050660; flavin adenine dinucleotide binding; molecular_function GO:0045454; cell redox homeostasis; biological_process GO:0008033; tRNA processing; biological_process}	{XM_010695660.2; PREDICTED: Beta vulgaris subsp. vulgaris glutathione reductase, chloroplastic (LOC104906832), mRNA}	{PF01134:Glucose inhibited division protein A PF01266:FAD dependent oxidoreductase PF07992:Pyridine nucleotide-disulphide oxidoreductase PF02852:Pyridine nucleotide-disulphide oxidoreductase, dimerisation domain PF12831:FAD dependent oxidoreductase PF01593:Flavin containing amine oxidoreductase PF00070:Pyridine nucleotide-disulphide oxidoreductase}
transcript_HQ_SAB_transcript14459/f2p0/1962	0.7567	0.0020471	0.0033268	{XP_010693136.1; PREDICTED: Glutathione S-transferase DHAR2 [Beta vulgaris subsp. vulgaris]}	{sp|Q9FRL8|DHAR2_ARATH; Glutathione S-transferase DHAR2 OS=Arabidopsis thaliana GN=DHAR2 PE=1 SV=1}	{nta:107777254; - - - - -}	{At1g75270; KOG1422 Intracellular Cl- channel CLIC, contains GST domain P Inorganic ion transport and metabolism ;}	{NA}	{XM_010694834.2; PREDICTED: Beta vulgaris subsp. vulgaris Glutathione S-transferase DHAR2 (LOC104906117), mRNA}	{NA}
transcript_HQ_SAB_transcript13671/f4p0/1946	9.1883	7.3263e-179	2.3361e-177	{KNA06708.1; hypothetical protein SOVF_178510 [Spinacia oleracea]}	{sp|Q43154|GSHRP_SPIOL; Glutathione reductase, chloroplastic (Fragment) OS=Spinacia oleracea PE=2 SV=1}	{vra:106770425; K00383 GSR, gor glutathione reductase (NADPH) 1.8.1.7 ko00480; Metabolism; Metabolism of other amino acids; Glutathione metabolism | ko04918; Organismal Systems; Endocrine system; Thyroid hormone synthesis}	{At3g24170; KOG0405 Pyridine nucleotide-disulphide oxidoreductase Q Secondary metabolites biosynthesis, transport and catabolism ;}	{GO:0050660; flavin adenine dinucleotide binding; molecular_function GO:0055114; oxidation-reduction process; biological_process GO:0045454; cell redox homeostasis; biological_process GO:0016491; oxidoreductase activity; molecular_function GO:0008033; tRNA processing; biological_process}	{XM_010695660.2; PREDICTED: Beta vulgaris subsp. vulgaris glutathione reductase, chloroplastic (LOC104906832), mRNA}	{PF01134:Glucose inhibited division protein A PF01266:FAD dependent oxidoreductase PF07992:Pyridine nucleotide-disulphide oxidoreductase PF02852:Pyridine nucleotide-disulphide oxidoreductase, dimerisation domain PF00070:Pyridine nucleotide-disulphide oxidoreductase PF01593:Flavin containing amine oxidoreductase PF12831:FAD dependent oxidoreductase}
transcript_HQ_SAB_transcript13632/f6p0/1999	-1.6104	8.9481e-34	4.8397e-33	{AAK67359.2; catalase [Suaeda salsa]}	{sp|P17598|CATA1_GOSHI; Catalase isozyme 1 OS=Gossypium hirsutum GN=CAT1 PE=2 SV=2}	{gra:105783611; K03781 katE, CAT, catB, srpA catalase 1.11.1.6 ko01200; Metabolism; Global and overview maps; Carbon metabolism | ko00630; Metabolism; Carbohydrate metabolism; Glyoxylate and dicarboxylate metabolism | ko00380; Metabolism; Amino acid metabolism; Tryptophan metabolism | ko04016; Environmental Information Processing; Signal transduction; MAPK signaling pathway - plant | ko04011; Env…	{At4g35090; KOG0047 Catalase P Inorganic ion transport and metabolism ;}	{GO:0004096; catalase activity; molecular_function GO:0030345; structural constituent of tooth enamel; molecular_function GO:0020037; heme binding; molecular_function GO:0055114; oxidation-reduction process; biological_process GO:0042475; odontogenesis of dentine-containing tooth; biological_process}	{KJ690269.1; Bassia scoparia CAT1 mRNA, complete cds}	{PF05111:Ameloblastin precursor (Amelin) PF00199:Catalase}
transcript_HQ_SAB_transcript12922/f2p0/2062	1.5706	4.9168e-33	2.6046e-32	{XP_010682545.1; PREDICTED: probable nucleoredoxin 1 [Beta vulgaris subsp. vulgaris]}	{sp|O80763|NRX1_ARATH; Probable nucleoredoxin 1 OS=Arabidopsis thaliana GN=At1g60420 PE=1 SV=1}	{vvi:100852822; K17609 NXN nucleoredoxin 1.8.1.8 -}	{At1g60420; KOG2501 Thioredoxin, nucleoredoxin and related proteins R General function prediction only ;}	{GO:0016209; NA GO:0004602; glutathione Peroxidase activity; molecular_function GO:0055114; oxidation-reduction process; biological_process GO:0045454; cell redox homeostasis; biological_process GO:0016491; oxidoreductase activity; molecular_function GO:0051539; 4 iron, 4 sulfur cluster binding; molecular_function GO:0006979; response to oxidative stress; biological_process}	{XM_010684243.2; PREDICTED: Beta vulgaris subsp. vulgaris probable nucleoredoxin 1 (LOC104897380), mRNA}	{PF10589:NADH-ubiquinone oxidoreductase-F iron-sulfur binding region PF00085:Thioredoxin PF00578:AhpC/TSA family PF08534:Redoxin PF00255:Glutathione Peroxidase}
transcript_HQ_SAB_transcript12266/f4p0/2089	1.1903	4.1146e-16	1.3382e-15	{XP_010686506.1; PREDICTED: monothiol glutaredoxin-S17 [Beta vulgaris subsp. vulgaris]}	{sp|Q9ZPH2|GRS17_ARATH; Monothiol glutaredoxin-S17 OS=Arabidopsis thaliana GN=GRXS17 PE=1 SV=1}	{sot:102595988; - - - - -}	{At4g04950; KOG0911 Glutaredoxin-related protein O Posttranslational modification, protein turnover, chaperones ;}	{GO:0009294; DNA mediated transformation; biological_process GO:0045454; cell redox homeostasis; biological_process GO:0005515; protein binding; molecular_function GO:0009055; NA GO:0015035; protein disulfide oxidoreductase activity; molecular_function}	{XM_010688205.2; PREDICTED: Beta vulgaris subsp. vulgaris monothiol glutaredoxin-S17 (LOC104900712), transcript variant X2, mRNA}	{PF00462:Glutaredoxin PF00085:Thioredoxin PF13417:Glutathione S-transferase, N-terminal domain PF02481:DNA recombination-mediator protein A}
transcript_HQ_SAB_transcript10611/f4p0/2246	2.9128	1.2132e-08	2.8666e-08	{NA}	{NA}	{NA}	{NA}	{NA}	{XR_002040922.1; PREDICTED: Beta vulgaris subsp. vulgaris Peroxidase P7-like (LOC104903393), transcript variant X4, misc_RNA}	{NA}
transcript_HQ_BAB_transcript9708/f2p0/2601	0.98042	0.026676	0.038093	{KMT05433.1; hypothetical protein BVRB_7g175600 [Beta vulgaris subsp. vulgaris]}	{sp|P22195|PER1_ARAHY; Cationic Peroxidase 1 OS=Arachis hypogaea GN=PNC1 PE=1 SV=2}	{cit:102626253; K00430 E1.11.1.7 Peroxidase 1.11.1.7 ko00940; Metabolism; Biosynthesis of other secondary metabolites; Phenylpropanoid biosynthesis}	{NA}	{GO:0000145; exocyst; cellular_component GO:0071973; bacterial-type flagellar cell motility; biological_process GO:0008289; lipid binding; molecular_function GO:0031083; BLOC-1 complex; cellular_component GO:0006887; exocytosis; biological_process GO:0005198; NA}	{XM_010687659.2; PREDICTED: Beta vulgaris subsp. vulgaris biogenesis of lysosome-related organelles complex 1 subunit 1 (LOC104900271), transcript variant X4, mRNA}	{PF01852:START domain PF06320:GCN5-like protein 1 (GCN5L1) PF09763:Exocyst complex component Sec3 PF00669:Bacterial flagellin N-terminal helical region}
transcript_HQ_BAB_transcript8917/f2p0/2712	0.79046	0.023492	0.033789	{KNA18666.1; hypothetical protein SOVF_068620 [Spinacia oleracea]}	{sp|Q42564|APX3_ARATH; L-Ascorbate peroxidase 3, peroxisomal OS=Arabidopsis thaliana GN=APX3 PE=1 SV=1}	{sbi:SORBI_06g001970; K00434 E1.11.1.11 L-Ascorbate peroxidase 1.11.1.11 ko00053; Metabolism; Carbohydrate metabolism; Ascorbate and aldarate metabolism | ko00480; Metabolism; Metabolism of other amino acids; Glutathione metabolism}	{NA}	{GO:0020037; heme binding; molecular_function GO:0055114; oxidation-reduction process; biological_process GO:0006979; response to oxidative stress; biological_process GO:0004601; Peroxidase activity; molecular_function}	{XM_010681600.2; PREDICTED: Beta vulgaris subsp. vulgaris L-Ascorbate peroxidase 3, peroxisomal (LOC104895170), mRNA}	{PF00141:Peroxidase}
transcript_HQ_BAB_transcript7662/f2p0/2845	4.8224	2.3864e-67	2.3823e-66	{KNA21837.1; hypothetical protein SOVF_039670 [Spinacia oleracea]}	{sp|A7QEU4|PER5_VITVI; Peroxidase 5 OS=Vitis vinifera GN=GSVIVT00037159001 PE=1 SV=2}	{bvg:104890653; K00430 E1.11.1.7 Peroxidase 1.11.1.7 ko00940; Metabolism; Biosynthesis of other secondary metabolites; Phenylpropanoid biosynthesis}	{NA}	{GO:0055114; oxidation-reduction process; biological_process GO:0020037; heme binding; molecular_function GO:0006979; response to oxidative stress; biological_process GO:0004601; Peroxidase activity; molecular_function}	{XM_010676222.2; PREDICTED: Beta vulgaris subsp. vulgaris Peroxidase 5-like (LOC104890653), mRNA}	{PF00141:Peroxidase}
transcript_HQ_BAB_transcript6087/f2p0/3068	2.7915	3.5493e-14	1.0768e-13	{KNA08419.1; hypothetical protein SOVF_162770 [Spinacia oleracea]}	{sp|Q948T9|RBOHB_SOLTU; Respiratory burst oxidase homolog protein B OS=Solanum tuberosum GN=RBOHB PE=1 SV=1}	{bvg:104890306; K13447 RBOH respiratory burst oxidase [EC:1.6.3.- 1.11.1.-] 1.6.3.-,1.11.1.- ko04016; Environmental Information Processing; Signal transduction; MAPK signaling pathway - plant | ko04626; Organismal Systems; Environmental adaptation; Plant-pathogen interaction}	{At5g51060; KOG0039 Ferric reductase, NADH/NADPH oxidase and related proteins PQ Inorganic ion transport and metabolism ; Secondary metabolites biosynthesis, transport and catabolism ;}	{GO:0016514; SWI/SNF complex; cellular_component GO:0005634; nucleus; cellular_component GO:0004601; Peroxidase activity; molecular_function GO:0006779; porphyrin biosynthetic process; biological_process GO:0050664; oxidoreductase activity, acting on NADH or NADPH, oxygen as acceptor; molecular_function GO:0055114; oxidation-reduction process; biological_process GO:0006338; chromatin remodeling; …	{NA}	{PF09510:Rtt102p-like transcription regulator protein PF10414:Sirohaem synthase dimerisation region PF08414:Respiratory burst NADPH oxidase}
transcript_HQ_BAB_transcript4067/f2p0/3466	3.9794	5.4473e-58	4.6737e-57	{KNA08419.1; hypothetical protein SOVF_162770 [Spinacia oleracea]}	{sp|Q948T9|RBOHB_SOLTU; Respiratory burst oxidase homolog protein B OS=Solanum tuberosum GN=RBOHB PE=1 SV=1}	{bvg:104890306; K13447 RBOH respiratory burst oxidase [EC:1.6.3.- 1.11.1.-] 1.6.3.-,1.11.1.- ko04016; Environmental Information Processing; Signal transduction; MAPK signaling pathway - plant | ko04626; Organismal Systems; Environmental adaptation; Plant-pathogen interaction}	{At5g47910; KOG0039 Ferric reductase, NADH/NADPH oxidase and related proteins PQ Inorganic ion transport and metabolism ; Secondary metabolites biosynthesis, transport and catabolism ;}	{GO:0035307; positive regulation of protein dephosphorylation; biological_process GO:0050664; oxidoreductase activity, acting on NADH or NADPH, oxygen as acceptor; molecular_function GO:0006779; porphyrin biosynthetic process; biological_process GO:0055114; oxidation-reduction process; biological_process GO:0006338; chromatin remodeling; biological_process GO:0016586; RSC complex; cellular_compon…	{XM_010675737.2; PREDICTED: Beta vulgaris subsp. vulgaris respiratory burst oxidase homolog protein B (LOC104890306), mRNA}	{PF13405:EF-hand domain PF10414:Sirohaem synthase dimerisation region PF08030:Ferric reductase NAD binding domain PF00036:EF hand PF09510:Rtt102p-like transcription regulator protein PF13202:EF hand PF09771:Transmembrane protein 188 PF08414:Respiratory burst NADPH oxidase PF13499:EF-hand domain pair PF08022:FAD-binding domain}
transcript_HQ_BAB_transcript3384/f2p0/3577	6.1398	5.3591e-296	5.2519e-294	{KNA08419.1; hypothetical protein SOVF_162770 [Spinacia oleracea]}	{sp|Q948T9|RBOHB_SOLTU; Respiratory burst oxidase homolog protein B OS=Solanum tuberosum GN=RBOHB PE=1 SV=1}	{bvg:104890306; K13447 RBOH respiratory burst oxidase [EC:1.6.3.- 1.11.1.-] 1.6.3.-,1.11.1.- ko04016; Environmental Information Processing; Signal transduction; MAPK signaling pathway - plant | ko04626; Organismal Systems; Environmental adaptation; Plant-pathogen interaction}	{At5g47910; KOG0039 Ferric reductase, NADH/NADPH oxidase and related proteins PQ Inorganic ion transport and metabolism ; Secondary metabolites biosynthesis, transport and catabolism ;}	{GO:0005634; nucleus; cellular_component GO:0016514; SWI/SNF complex; cellular_component GO:0005509; calcium ion binding; molecular_function GO:0071595; Nem1-Spo7 phosphatase complex; cellular_component GO:0004601; Peroxidase activity; molecular_function GO:0035307; positive regulation of protein dephosphorylation; biological_process GO:0050664; oxidoreductase activity, acting on NADH or NADPH, o…	{XM_010675737.2; PREDICTED: Beta vulgaris subsp. vulgaris respiratory burst oxidase homolog protein B (LOC104890306), mRNA}	{PF08030:Ferric reductase NAD binding domain PF00036:EF hand PF13405:EF-hand domain PF10414:Sirohaem synthase dimerisation region PF09771:Transmembrane protein 188 PF08414:Respiratory burst NADPH oxidase PF13499:EF-hand domain pair PF08022:FAD-binding domain PF09510:Rtt102p-like transcription regulator protein PF13202:EF hand}
transcript_HQ_BAB_transcript2992/f3p0/3680	7.3461	2.308e-172	6.8865e-171	{XP_010687558.1; PREDICTED: respiratory burst oxidase homolog protein E [Beta vulgaris subsp. vulgaris]}	{sp|O81211|RBOHE_ARATH; Respiratory burst oxidase homolog protein E OS=Arabidopsis thaliana GN=RBOHE PE=2 SV=2}	{egr:104436388; K13447 RBOH respiratory burst oxidase [EC:1.6.3.- 1.11.1.-] 1.6.3.-,1.11.1.- ko04016; Environmental Information Processing; Signal transduction; MAPK signaling pathway - plant | ko04626; Organismal Systems; Environmental adaptation; Plant-pathogen interaction}	{At1g19230; KOG0039 Ferric reductase, NADH/NADPH oxidase and related proteins PQ Inorganic ion transport and metabolism ; Secondary metabolites biosynthesis, transport and catabolism ;}	{GO:0016491; oxidoreductase activity; molecular_function GO:0004601; Peroxidase activity; molecular_function GO:0005509; calcium ion binding; molecular_function GO:0050664; oxidoreductase activity, acting on NADH or NADPH, oxygen as acceptor; molecular_function GO:0030474; spindle pole body duplication; biological_process GO:0071988; protein localization to spindle pole body; biological_process G…	{XM_010689256.2; PREDICTED: Beta vulgaris subsp. vulgaris respiratory burst oxidase homolog protein E (LOC104901666), mRNA}	{PF13405:EF-hand domain PF08030:Ferric reductase NAD binding domain PF00036:EF hand PF17060:Monopolar spindle protein 2 PF13202:EF hand PF08414:Respiratory burst NADPH oxidase PF13499:EF-hand domain pair PF08022:FAD-binding domain}
transcript_HQ_BAB_transcript2289/f3p0/3955	0.92098	1.2731e-10	3.3169e-10	{XP_010673121.1; PREDICTED: transcription elongation factor SPT6 homolog isoform X2 [Beta vulgaris subsp. vulgaris]}	{sp|A8MS85|SPT61_ARATH; Transcription elongation factor SPT6 homolog OS=Arabidopsis thaliana GN=SPT6 PE=1 SV=1}	{bvg:104889562; K11292 SUPT6H, SPT6 transcription elongation factor SPT6 - -}	{At1g65440; KOG1856 Transcription elongation factor SPT6 A RNA processing and modification ;}	{GO:0015031; protein transport; biological_process GO:0046872; metal ion binding; molecular_function GO:0006801; superoxide metabolic process; biological_process GO:0003677; DNA binding; molecular_function GO:0030123; AP-3 adaptor complex; cellular_component GO:0055114; oxidation-reduction process; biological_process}	{XM_010674819.2; PREDICTED: Beta vulgaris subsp. vulgaris transcription elongation factor SPT6 homolog (LOC104889562), transcript variant X2, mRNA}	{PF14641:Helix-turn-helix DNA-binding domain of SPT6 PF00080:Copper/zinc Superoxide dismutase (SODC) PF06375:Bovine leukaemia virus receptor (BLVR)}
transcript_HQ_BAB_transcript20404/f7p0/958	2.1395	0.0066224	0.010181	{KNA11546.1; hypothetical protein SOVF_134140 [Spinacia oleracea]}	{sp|Q04522|GSTF_SILVU; Glutathione S-transferase OS=Silene vulgaris GN=GST PE=1 SV=3}	{nnu:104599001; K00799 GST, gst Glutathione S-transferase 2.5.1.18 ko00480; Metabolism; Metabolism of other amino acids; Glutathione metabolism | ko00980; Metabolism; Xenobiotics biodegradation and metabolism; Metabolism of xenobiotics by cytochrome P450 | ko00982; Metabolism; Xenobiotics biodegradation and metabolism; Drug metabolism - cytochrome P450 | ko05204; Human Diseases; Cancers: Overview…	{At2g47730; KOG0867 Glutathione S-transferase O Posttranslational modification, protein turnover, chaperones ;}	{NA}	{XM_010667483.2; PREDICTED: Beta vulgaris subsp. vulgaris Glutathione S-transferase (LOC104883042), mRNA}	{NA}
transcript_HQ_BAB_transcript20368/f2p0/1037	2.5003	4.03e-56	3.3475e-55	{AFD50703.1; manganese Superoxide dismutase [Salicornia europaea]}	{sp|Q9SM64|SODM_PRUPE; Superoxide dismutase [Mn], mitochondrial OS=Prunus persica GN=SOD PE=2 SV=1}	{bvg:104887645; K04564 SOD2 Superoxide dismutase, Fe-Mn family 1.15.1.1 ko04013; Environmental Information Processing; Signal transduction; MAPK signaling pathway - fly | ko04068; Environmental Information Processing; Signal transduction; FoxO signaling pathway | ko04146; Cellular Processes; Transport and catabolism; Peroxisome | ko04211; Organismal Systems; Aging; Longevity regulating pathway | …	{At3g10920; KOG0876 Manganese Superoxide dismutase P Inorganic ion transport and metabolism ;}	{GO:0046872; metal ion binding; molecular_function GO:0006801; superoxide metabolic process; biological_process GO:0004784; Superoxide dismutase activity; molecular_function GO:0055114; oxidation-reduction process; biological_process}	{JQ061158.1; Salicornia europaea manganese Superoxide dismutase (MnSOD) mRNA, complete cds}	{PF02777:Iron/manganese Superoxide dismutases, C-terminal domain PF00081:Iron/manganese Superoxide dismutases, alpha-hairpin domain}
transcript_HQ_BAB_transcript20282/f2p0/1118	8.9732	3.1446e-277	2.4699e-275	{XP_010689420.1; PREDICTED: L-Ascorbate peroxidase, cytosolic [Beta vulgaris subsp. vulgaris]}	{sp|P48534|APX1_PEA; L-Ascorbate peroxidase, cytosolic OS=Pisum sativum GN=APX1 PE=1 SV=2}	{pda:103702852; K00434 E1.11.1.11 L-Ascorbate peroxidase 1.11.1.11 ko00053; Metabolism; Carbohydrate metabolism; Ascorbate and aldarate metabolism | ko00480; Metabolism; Metabolism of other amino acids; Glutathione metabolism}	{NA}	{GO:0020037; heme binding; molecular_function GO:0055114; oxidation-reduction process; biological_process GO:0004601; Peroxidase activity; molecular_function GO:0006979; response to oxidative stress; biological_process}	{XM_010691118.2; PREDICTED: Beta vulgaris subsp. vulgaris L-Ascorbate peroxidase, cytosolic (LOC104903122), mRNA}	{PF00141:Peroxidase}
transcript_HQ_BAB_transcript20264/f2p0/1121	9.3377	0	0	{KNA15210.1; hypothetical protein SOVF_100390, partial [Spinacia oleracea]}	{sp|Q8H8U5|IN21B_ORYSJ; Protein IN2-1 homolog B OS=Oryza sativa subsp. japonica GN=GSTZ5 PE=2 SV=1}	{nnu:104599214; K00799 GST, gst Glutathione S-transferase 2.5.1.18 ko00480; Metabolism; Metabolism of other amino acids; Glutathione metabolism | ko00980; Metabolism; Xenobiotics biodegradation and metabolism; Metabolism of xenobiotics by cytochrome P450 | ko00982; Metabolism; Xenobiotics biodegradation and metabolism; Drug metabolism - cytochrome P450 | ko05204; Human Diseases; Cancers: Overview…	{At5g02790; KOG0406 Glutathione S-transferase O Posttranslational modification, protein turnover, chaperones ;}	{GO:0005515; protein binding; molecular_function}	{XM_010693580.2; PREDICTED: Beta vulgaris subsp. vulgaris protein IN2-1 homolog B (LOC104905130), mRNA}	{PF02798:Glutathione S-transferase, N-terminal domain PF13409:Glutathione S-transferase, N-terminal domain PF13417:Glutathione S-transferase, N-terminal domain}
transcript_HQ_BAB_transcript20201/f2p0/1168	0.62862	6.2392e-06	1.2489e-05	{KNA18404.1; hypothetical protein SOVF_070820 [Spinacia oleracea]}	{sp|Q7XZP5|APX5_ARATH; L-Ascorbate peroxidase 5, peroxisomal OS=Arabidopsis thaliana GN=APX5 PE=1 SV=2}	{eus:EUTSA_v10025942mg; K00434 E1.11.1.11 L-Ascorbate peroxidase 1.11.1.11 ko00053; Metabolism; Carbohydrate metabolism; Ascorbate and aldarate metabolism | ko00480; Metabolism; Metabolism of other amino acids; Glutathione metabolism}	{NA}	{GO:0006979; response to oxidative stress; biological_process GO:0004601; Peroxidase activity; molecular_function GO:0055114; oxidation-reduction process; biological_process GO:0020037; heme binding; molecular_function}	{XM_019250091.1; PREDICTED: Beta vulgaris subsp. vulgaris L-Ascorbate peroxidase 5, peroxisomal-like (LOC104895169), mRNA}	{PF00141:Peroxidase}
transcript_HQ_BAB_transcript20191/f4p0/1163	10.688	9.8608e-254	6.0019e-252	{XP_010679902.1; PREDICTED: L-Ascorbate peroxidase 3, peroxisomal [Beta vulgaris subsp. vulgaris]}	{sp|Q42564|APX3_ARATH; L-Ascorbate peroxidase 3, peroxisomal OS=Arabidopsis thaliana GN=APX3 PE=1 SV=1}	{vra:106756337; K00434 E1.11.1.11 L-Ascorbate peroxidase 1.11.1.11 ko00053; Metabolism; Carbohydrate metabolism; Ascorbate and aldarate metabolism | ko00480; Metabolism; Metabolism of other amino acids; Glutathione metabolism}	{NA}	{GO:0020037; heme binding; molecular_function GO:0055114; oxidation-reduction process; biological_process GO:0006979; response to oxidative stress; biological_process GO:0004601; Peroxidase activity; molecular_function}	{XM_010681600.2; PREDICTED: Beta vulgaris subsp. vulgaris L-Ascorbate peroxidase 3, peroxisomal (LOC104895170), mRNA}	{PF00141:Peroxidase}
transcript_HQ_BAB_transcript20118/f4p0/1181	Inf	7.7265e-279	6.1593e-277	{KNA20639.1; hypothetical protein SOVF_050500 [Spinacia oleracea]}	{sp|Q42564|APX3_ARATH; L-Ascorbate peroxidase 3, peroxisomal OS=Arabidopsis thaliana GN=APX3 PE=1 SV=1}	{cmo:103490293; K00434 E1.11.1.11 L-Ascorbate peroxidase 1.11.1.11 ko00053; Metabolism; Carbohydrate metabolism; Ascorbate and aldarate metabolism | ko00480; Metabolism; Metabolism of other amino acids; Glutathione metabolism}	{NA}	{GO:0006979; response to oxidative stress; biological_process GO:0004601; Peroxidase activity; molecular_function GO:0020037; heme binding; molecular_function GO:0055114; oxidation-reduction process; biological_process}	{EU746400.1; Salicornia brachiata peroxisomal Ascorbate peroxidase mRNA, complete cds}	{PF00141:Peroxidase}
transcript_HQ_BAB_transcript20019/f2p0/1250	1.4136	7.0767e-25	3.0389e-24	{BAS29464.1; iron Superoxide dismutase [Suaeda maritima]}	{sp|Q9LU64|SODF2_ARATH; Superoxide dismutase [Fe] 2, chloroplastic OS=Arabidopsis thaliana GN=FSD2 PE=1 SV=1}	{bvg:104892465; K04564 SOD2 Superoxide dismutase, Fe-Mn family 1.15.1.1 ko04013; Environmental Information Processing; Signal transduction; MAPK signaling pathway - fly | ko04068; Environmental Information Processing; Signal transduction; FoxO signaling pathway | ko04146; Cellular Processes; Transport and catabolism; Peroxisome | ko04211; Organismal Systems; Aging; Longevity regulating pathway | …	{At5g51100; KOG0876 Manganese Superoxide dismutase P Inorganic ion transport and metabolism ;}	{GO:0006801; superoxide metabolic process; biological_process GO:0004784; Superoxide dismutase activity; molecular_function GO:0046872; metal ion binding; molecular_function GO:0055114; oxidation-reduction process; biological_process}	{LC027286.1; Suaeda maritima Fe-SOD mRNA for iron Superoxide dismutase, complete cds, country: Egypt}	{PF02777:Iron/manganese Superoxide dismutases, C-terminal domain PF00081:Iron/manganese Superoxide dismutases, alpha-hairpin domain}
transcript_HQ_BAB_transcript19879/f4p0/1293	-0.81479	1.5247e-09	3.7705e-09	{KNA18404.1; hypothetical protein SOVF_070820 [Spinacia oleracea]}	{sp|Q7XZP5|APX5_ARATH; L-Ascorbate peroxidase 5, peroxisomal OS=Arabidopsis thaliana GN=APX5 PE=1 SV=2}	{crb:CARUB_v10007422mg; K00434 E1.11.1.11 L-Ascorbate peroxidase 1.11.1.11 ko00053; Metabolism; Carbohydrate metabolism; Ascorbate and aldarate metabolism | ko00480; Metabolism; Metabolism of other amino acids; Glutathione metabolism}	{NA}	{GO:0006979; response to oxidative stress; biological_process GO:0004601; Peroxidase activity; molecular_function GO:0055114; oxidation-reduction process; biological_process GO:0020037; heme binding; molecular_function}	{D49679.1; Spinacia oleracea mRNA for Ascorbate peroxidase, complete cds}	{PF00141:Peroxidase}
transcript_HQ_BAB_transcript19736/f2p0/1364	-1.7353	6.8944e-31	3.4829e-30	{XP_010686841.1; PREDICTED: Peroxidase 42 [Beta vulgaris subsp. vulgaris]}	{sp|Q9SB81|PER42_ARATH; Peroxidase 42 OS=Arabidopsis thaliana GN=PER42 PE=1 SV=2}	{fve:101292774; K00430 E1.11.1.7 Peroxidase 1.11.1.7 ko00940; Metabolism; Biosynthesis of other secondary metabolites; Phenylpropanoid biosynthesis}	{NA}	{GO:0055114; oxidation-reduction process; biological_process GO:0020037; heme binding; molecular_function GO:0006979; response to oxidative stress; biological_process GO:0004601; Peroxidase activity; molecular_function}	{XM_010688539.2; PREDICTED: Beta vulgaris subsp. vulgaris Peroxidase 42 (LOC104900996), mRNA}	{PF00141:Peroxidase}
transcript_HQ_BAB_transcript19702/f3p0/1360	0.9634	4.5144e-11	1.1979e-10	{XP_010685987.1; PREDICTED: Peroxidase 57 [Beta vulgaris subsp. vulgaris]}	{sp|Q9FMR0|PER60_ARATH; Peroxidase 60 OS=Arabidopsis thaliana GN=PER60 PE=1 SV=1}	{pmum:103328930; K00430 E1.11.1.7 Peroxidase 1.11.1.7 ko00940; Metabolism; Biosynthesis of other secondary metabolites; Phenylpropanoid biosynthesis}	{NA}	{GO:0006979; response to oxidative stress; biological_process GO:0004601; Peroxidase activity; molecular_function GO:0055114; oxidation-reduction process; biological_process GO:0020037; heme binding; molecular_function}	{AM265608.1; Beta vulgaris mRNA for cationic Peroxidase (cprx1 gene)}	{PF00141:Peroxidase}
transcript_HQ_BAB_transcript19599/f3p0/1384	4.8529	1.6868e-60	1.5129e-59	{XP_010687743.1; PREDICTED: uncharacterized protein LOC104901818 isoform X1 [Beta vulgaris subsp. vulgaris]}	{sp|P42620|YQJG_ECOLI; Glutathionyl-hydroquinone reductase YqjG OS=Escherichia coli (strain K12) GN=yqjG PE=1 SV=1}	{vvi:100268002; K07393 ECM4 putative Glutathione S-transferase - -}	{At5g45020; KOG2903 Predicted Glutathione S-transferase O Posttranslational modification, protein turnover, chaperones ;}	{GO:0005515; protein binding; molecular_function}	{XM_010538259.2; PREDICTED: Tarenaya hassleriana glutathionyl-hydroquinone reductase YqjG (LOC104811533), transcript variant X2, mRNA}	{PF13409:Glutathione S-transferase, N-terminal domain PF13417:Glutathione S-transferase, N-terminal domain}
transcript_HQ_BAB_transcript19369/f3p0/1439	-1.2822	2.7707e-20	1.0361e-19	{BAS29464.1; iron Superoxide dismutase [Suaeda maritima]}	{sp|Q9LU64|SODF2_ARATH; Superoxide dismutase [Fe] 2, chloroplastic OS=Arabidopsis thaliana GN=FSD2 PE=1 SV=1}	{bvg:104892465; K04564 SOD2 Superoxide dismutase, Fe-Mn family 1.15.1.1 ko04013; Environmental Information Processing; Signal transduction; MAPK signaling pathway - fly | ko04068; Environmental Information Processing; Signal transduction; FoxO signaling pathway | ko04146; Cellular Processes; Transport and catabolism; Peroxisome | ko04211; Organismal Systems; Aging; Longevity regulating pathway | …	{At5g51100; KOG0876 Manganese Superoxide dismutase P Inorganic ion transport and metabolism ;}	{GO:0046872; metal ion binding; molecular_function GO:0004784; Superoxide dismutase activity; molecular_function GO:0006801; superoxide metabolic process; biological_process GO:0055114; oxidation-reduction process; biological_process}	{LC027286.1; Suaeda maritima Fe-SOD mRNA for iron Superoxide dismutase, complete cds, country: Egypt}	{PF02777:Iron/manganese Superoxide dismutases, C-terminal domain PF00081:Iron/manganese Superoxide dismutases, alpha-hairpin domain}
transcript_HQ_BAB_transcript18469/f2p0/1600	Inf	2.9947e-78	3.4904e-77	{ADA68878.1; stroma Ascorbate peroxidase precursor (chloroplast) [Suaeda salsa]}	{sp|Q42593|APXT_ARATH; L-Ascorbate peroxidase T, chloroplastic OS=Arabidopsis thaliana GN=APXT PE=2 SV=2}	{bvg:104891011; K00434 E1.11.1.11 L-Ascorbate peroxidase 1.11.1.11 ko00053; Metabolism; Carbohydrate metabolism; Ascorbate and aldarate metabolism | ko00480; Metabolism; Metabolism of other amino acids; Glutathione metabolism}	{NA}	{GO:0055114; oxidation-reduction process; biological_process GO:0020037; heme binding; molecular_function GO:0006979; response to oxidative stress; biological_process GO:0004601; Peroxidase activity; molecular_function}	{GU228491.1; Suaeda salsa stroma Ascorbate peroxidase precursor, mRNA, complete cds; chloroplast}	{PF00141:Peroxidase}
transcript_HQ_BAB_transcript18384/f3p0/1634	12.865	1.6e-165	4.4919e-164	{XP_010677101.1; PREDICTED: nudix hydrolase 8 [Beta vulgaris subsp. vulgaris]}	{sp|Q8L7W2|NUDT8_ARATH; Nudix hydrolase 8 OS=Arabidopsis thaliana GN=NUDT8 PE=2 SV=2}	{bvg:104892794; - - - - -}	{At5g47240; KOG0648 Predicted NUDIX hydrolase FGF-2 and related proteins T Signal transduction mechanisms ;}	{GO:0055114; oxidation-reduction process; biological_process GO:0004784; Superoxide dismutase activity; molecular_function GO:0006801; superoxide metabolic process; biological_process GO:0046872; metal ion binding; molecular_function GO:0016787; hydrolase activity; molecular_function}	{XM_010678799.2; PREDICTED: Beta vulgaris subsp. vulgaris nudix hydrolase 8 (LOC104892794), mRNA}	{PF00081:Iron/manganese Superoxide dismutases, alpha-hairpin domain PF00293:NUDIX domain}
transcript_HQ_BAB_transcript17994/f3p0/1608	-0.69861	2.7953e-07	6.1105e-07	{XP_006302321.1; hypothetical protein CARUB_v10020374mg [Capsella rubella]}	{sp|Q6YW46|EF1G2_ORYSJ; Elongation factor 1-gamma 2 OS=Oryza sativa subsp. japonica GN=Os02g0220500 PE=2 SV=2}	{bvg:104901036; K03233 EEF1G elongation factor 1-gamma - ko05134; Human Diseases; Infectious diseases: Bacterial; Legionellosis}	{At1g57720_2; KOG1627 Translation elongation factor EF-1 gamma J Translation, ribosomal structure and biogenesis ;}	{GO:0005515; protein binding; molecular_function GO:0006414; translational elongation; biological_process GO:0003746; translation elongation factor activity; molecular_function}	{XM_010688581.2; PREDICTED: Beta vulgaris subsp. vulgaris elongation factor 1-gamma (LOC104901036), mRNA}	{PF00647:Elongation factor 1 gamma, conserved domain PF13417:Glutathione S-transferase, N-terminal domain PF02798:Glutathione S-transferase, N-terminal domain PF13409:Glutathione S-transferase, N-terminal domain}
transcript_HQ_BAB_transcript17916/f3p0/1668	1.638	2.6485e-17	8.977e-17	{CAA71489.1; Peroxidase [Spinacia oleracea]}	{sp|Q9FMR0|PER60_ARATH; Peroxidase 60 OS=Arabidopsis thaliana GN=PER60 PE=1 SV=1}	{pmum:103328930; K00430 E1.11.1.7 Peroxidase 1.11.1.7 ko00940; Metabolism; Biosynthesis of other secondary metabolites; Phenylpropanoid biosynthesis}	{NA}	{GO:0020037; heme binding; molecular_function GO:0055114; oxidation-reduction process; biological_process GO:0004601; Peroxidase activity; molecular_function GO:0006979; response to oxidative stress; biological_process}	{AM265608.1; Beta vulgaris mRNA for cationic Peroxidase (cprx1 gene)}	{PF00141:Peroxidase}
transcript_HQ_BAB_transcript15377/f60p0/1888	Inf	0	0	{AAK67359.2; catalase [Suaeda salsa]}	{sp|P17598|CATA1_GOSHI; Catalase isozyme 1 OS=Gossypium hirsutum GN=CAT1 PE=2 SV=2}	{gra:105783611; K03781 katE, CAT, catB, srpA catalase 1.11.1.6 ko01200; Metabolism; Global and overview maps; Carbon metabolism | ko00630; Metabolism; Carbohydrate metabolism; Glyoxylate and dicarboxylate metabolism | ko00380; Metabolism; Amino acid metabolism; Tryptophan metabolism | ko04016; Environmental Information Processing; Signal transduction; MAPK signaling pathway - plant | ko04011; Env…	{At4g35090; KOG0047 Catalase P Inorganic ion transport and metabolism ;}	{GO:0055114; oxidation-reduction process; biological_process GO:0030345; structural constituent of tooth enamel; molecular_function GO:0020037; heme binding; molecular_function GO:0042475; odontogenesis of dentine-containing tooth; biological_process GO:0004096; catalase activity; molecular_function}	{KJ690269.1; Bassia scoparia CAT1 mRNA, complete cds}	{PF05111:Ameloblastin precursor (Amelin) PF00199:Catalase}
transcript_HQ_BAB_transcript14632/f14p0/1980	4.6687	8.6643e-72	9.2e-71	{KNA20548.1; hypothetical protein SOVF_051350 [Spinacia oleracea]}	{sp|P25819|CATA2_ARATH; Catalase-2 OS=Arabidopsis thaliana GN=CAT2 PE=2 SV=3}	{cann:107859787; - - - - -}	{At4g35090; KOG0047 Catalase P Inorganic ion transport and metabolism ;}	{GO:0004096; catalase activity; molecular_function GO:0055114; oxidation-reduction process; biological_process GO:0020037; heme binding; molecular_function}	{XM_010694242.2; PREDICTED: Beta vulgaris subsp. vulgaris catalase (LOC104905646), mRNA}	{PF00199:Catalase}
transcript_HQ_BAB_transcript10288/f3p0/2560	5.2888	3.5772e-58	3.0841e-57	{KNA08419.1; hypothetical protein SOVF_162770 [Spinacia oleracea]}	{sp|Q948T9|RBOHB_SOLTU; Respiratory burst oxidase homolog protein B OS=Solanum tuberosum GN=RBOHB PE=1 SV=1}	{bvg:104890306; K13447 RBOH respiratory burst oxidase [EC:1.6.3.- 1.11.1.-] 1.6.3.-,1.11.1.- ko04016; Environmental Information Processing; Signal transduction; MAPK signaling pathway - plant | ko04626; Organismal Systems; Environmental adaptation; Plant-pathogen interaction}	{At5g51060; KOG0039 Ferric reductase, NADH/NADPH oxidase and related proteins PQ Inorganic ion transport and metabolism ; Secondary metabolites biosynthesis, transport and catabolism ;}	{GO:0004601; Peroxidase activity; molecular_function GO:0006338; chromatin remodeling; biological_process GO:0016586; RSC complex; cellular_component GO:0055114; oxidation-reduction process; biological_process GO:0016514; SWI/SNF complex; cellular_component GO:0050664; oxidoreductase activity, acting on NADH or NADPH, oxygen as acceptor; molecular_function GO:0005634; nucleus; cellular_component}	{NA}	{PF09510:Rtt102p-like transcription regulator protein PF08414:Respiratory burst NADPH oxidase}
