# Supplementary material for: Characterization of the gene expression profile response to drought stress in Haloxylon using PacBio single-molecule real-time and Illumina sequencing
Source: Front Plant Sci. 2022 Aug 16;13:981029. doi: 10.3389/fpls.2022.981029 (PMC9424927; doi:10.3389/fpls.2022.981029)
Supplement: Supplementary file 7 [file Table_7.XLSX]

## Sheet: LS vs. HS
Table S7 DEGs related to lignin biosynthetic process in Haloxylon ammodendron
Gene_id	log2FoldChange	pval	padj	{nr}	{SwissProt}	{KEGG}	{KOG}	{GO}	{nt}	{pfam}
transcript_HQ_SAB_transcript7089/f182p0/2543	0.19705	2.0463e-06	6.3712e-06	{XP_010684079.1; PREDICTED: phenylalanine ammonia-lyase [Beta vulgaris subsp. vulgaris]}	{sp|P45730|PALY_POPTR; Phenylalanine ammonia-lyase OS=Populus trichocarpa GN=PAL PE=2 SV=1}	{gmx:100787902; K10775 PAL phenylalanine ammonia-lyase 4.3.1.24 ko00360; Metabolism; Amino acid metabolism; Phenylalanine metabolism | ko00940; Metabolism; Biosynthesis of other secondary metabolites; Phenylpropanoid biosynthesis}	{At2g37040; KOG0222 Phenylalanine and histidine ammonia-lyase Q Secondary metabolites biosynthesis, transport and catabolism ;}	{NA}	{XM_010685777.2; PREDICTED: Beta vulgaris subsp. vulgaris phenylalanine ammonia-lyase (LOC104898673), mRNA}	{NA}
transcript_HQ_SAB_transcript9757/f2p0/2354	0.76649	0.00021272	0.00053131	{XP_010677916.1; PREDICTED: 4-coumarate--CoA ligase-like 9 [Beta vulgaris subsp. vulgaris]}	{sp|Q84P23|4CLL9_ARATH; 4-coumarate--CoA ligase-like 9 OS=Arabidopsis thaliana GN=4CLL9 PE=1 SV=2}	{bvg:104893505; - - - - -}	{At5g63380; KOG1176 Acyl-CoA synthetase I Lipid transport and metabolism ;}	{GO:0003824; NA GO:0008152; NA}	{XM_010679614.2; PREDICTED: Beta vulgaris subsp. vulgaris 4-coumarate--CoA ligase-like 9 (LOC104893505), mRNA}	{PF00501:AMP-binding enzyme}
transcript_HQ_SAB_transcript9656/f2p0/2349	1.3251	0.00041118	0.00098968	{XP_010688353.1; PREDICTED: glucan endo-1,3-Beta-glucosidase 13 [Beta vulgaris subsp. vulgaris]}	{sp|Q9FJU9|E1313_ARATH; Glucan endo-1,3-Beta-glucosidase 13 OS=Arabidopsis thaliana GN=At5g56590 PE=1 SV=1}	{cit:102627838; - - - - -}	{NA}	{GO:0004553; hydrolase activity, hydrolyzing O-glycosyl compounds; molecular_function GO:0005975; carbohydrate metabolic process; biological_process}	{XM_010690051.2; PREDICTED: Beta vulgaris subsp. vulgaris glucan endo-1,3-Beta-glucosidase 13 (LOC104902320), mRNA}	{PF00332:Glycosyl hydrolases family 17}
transcript_HQ_SAB_transcript8986/f5p0/2385	-0.62219	0.016399	0.030795	{XP_010679655.1; PREDICTED: uncharacterized protein LOC104894964 [Beta vulgaris subsp. vulgaris]}	{sp|A7LXU3|BGH3B_BACO1; Beta-glucosidase BoGH3B OS=Bacteroides ovatus (strain ATCC 8483 / DSM 1896 / JCM 5824 / NCTC 11153) GN=BACOVA_02659 PE=1 SV=1}	{bvg:104894525; K05349 bglX Beta-glucosidase 3.2.1.21 ko00500; Metabolism; Carbohydrate metabolism; Starch and sucrose metabolism | ko00460; Metabolism; Metabolism of other amino acids; Cyanoamino acid metabolism | ko00940; Metabolism; Biosynthesis of other secondary metabolites; Phenylpropanoid biosynthesis}	{NA}	{GO:0004553; hydrolase activity, hydrolyzing O-glycosyl compounds; molecular_function GO:0005975; carbohydrate metabolic process; biological_process}	{XM_010698323.2; PREDICTED: Beta vulgaris subsp. vulgaris Beta-glucosidase BoGH3B (LOC104909120), transcript variant X2, mRNA}	{PF00933:Glycosyl hydrolase family 3 N terminal domain PF01915:Glycosyl hydrolase family 3 C-terminal domain}
transcript_HQ_SAB_transcript8586/f2p0/2449	0.77837	1.3054e-08	4.8267e-08	{XP_010694376.1; PREDICTED: uncharacterized protein LOC104907184 [Beta vulgaris subsp. vulgaris]}	{sp|A7LXU3|BGH3B_BACO1; Beta-glucosidase BoGH3B OS=Bacteroides ovatus (strain ATCC 8483 / DSM 1896 / JCM 5824 / NCTC 11153) GN=BACOVA_02659 PE=1 SV=1}	{lang:109338466; K05349 bglX Beta-glucosidase 3.2.1.21 ko00500; Metabolism; Carbohydrate metabolism; Starch and sucrose metabolism | ko00460; Metabolism; Metabolism of other amino acids; Cyanoamino acid metabolism | ko00940; Metabolism; Biosynthesis of other secondary metabolites; Phenylpropanoid biosynthesis; lang:109338466; - - - - -}	{NA}	{GO:0005975; carbohydrate metabolic process; biological_process GO:0004553; hydrolase activity, hydrolyzing O-glycosyl compounds; molecular_function}	{XM_010696075.2; PREDICTED: Beta vulgaris subsp. vulgaris Beta-glucosidase BoGH3B (LOC104907184), transcript variant X2, mRNA}	{PF01915:Glycosyl hydrolase family 3 C-terminal domain PF00933:Glycosyl hydrolase family 3 N terminal domain}
transcript_HQ_SAB_transcript3961/f5p0/3075	0.40116	0.021627	0.03961	{XP_010672074.1; PREDICTED: glucan endo-1,3-Beta-glucosidase 8 [Beta vulgaris subsp. vulgaris]}	{sp|Q6NKW9|E138_ARATH; Glucan endo-1,3-Beta-glucosidase 8 OS=Arabidopsis thaliana GN=At1g64760 PE=1 SV=2}	{bvg:104888732; - - - - -}	{NA}	{GO:0005975; carbohydrate metabolic process; biological_process GO:0004553; hydrolase activity, hydrolyzing O-glycosyl compounds; molecular_function}	{XM_010673772.2; PREDICTED: Beta vulgaris subsp. vulgaris glucan endo-1,3-Beta-glucosidase 8 (LOC104888732), mRNA}	{PF00332:Glycosyl hydrolases family 17}
transcript_HQ_SAB_transcript32125/f2p0/620	-0.75128	1.2473e-15	6.8733e-15	{XP_010690550.1; PREDICTED: glucan endo-1,3-Beta-glucosidase [Beta vulgaris subsp. vulgaris]}	{sp|Q94G86|ALL9_OLEEU; Glucan endo-1,3-beta-D-glucosidase OS=Olea europaea GN=OLE9 PE=1 SV=1}	{bvg:104904063; - - - - -}	{NA}	{NA}	{NA}	{NA}
transcript_HQ_SAB_transcript29438/f2p0/929	0.84619	5.0574e-12	2.3183e-11	{KNA21673.1; hypothetical protein SOVF_041080 [Spinacia oleracea]}	{sp|O49499|CAMT4_ARATH; Caffeoyl-CoA O-methyltransferase 1 OS=Arabidopsis thaliana GN=CCOAOMT1 PE=1 SV=1}	{thj:104804378; K00588 E2.1.1.104 caffeoyl-CoA O-methyltransferase 2.1.1.104 ko00360; Metabolism; Amino acid metabolism; Phenylalanine metabolism | ko00940; Metabolism; Biosynthesis of other secondary metabolites; Phenylpropanoid biosynthesis | ko00945; Metabolism; Biosynthesis of other secondary metabolites; Stilbenoid, diarylheptanoid and gingerol biosynthesis | ko00941; Metabolism; Biosynthesi…	{At4g34050; KOG1663 O-methyltransferase Q Secondary metabolites biosynthesis, transport and catabolism ;}	{GO:0008171; O-methyltransferase activity; molecular_function}	{XM_010692314.2; PREDICTED: Beta vulgaris subsp. vulgaris caffeoyl-CoA O-methyltransferase (LOC104904122), mRNA}	{PF01596:O-methyltransferase}
transcript_HQ_SAB_transcript28587/f2p0/1010	-1.3721	0.0085941	0.017053	{KNA04118.1; hypothetical protein SOVF_202610 [Spinacia oleracea]}	{sp|Q9ZQG9|E1314_ARATH; Glucan endo-1,3-Beta-glucosidase 14 OS=Arabidopsis thaliana GN=At2g27500 PE=1 SV=2}	{nnu:104588656; - - - - -}	{NA}	{NA}	{XM_010687701.2; PREDICTED: Beta vulgaris subsp. vulgaris glucan endo-1,3-Beta-glucosidase 14 (LOC104900311), mRNA}	{NA}
transcript_HQ_SAB_transcript28514/f7p0/1008	0.37335	0.00081978	0.0019029	{XP_015063664.1; PREDICTED: caffeoyl-CoA O-methyltransferase [Solanum pennellii]}	{sp|Q8H9B6|CAMT_SOLTU; Caffeoyl-CoA O-methyltransferase OS=Solanum tuberosum GN=CCOAOMT PE=2 SV=1}	{spen:107008953; K00588 E2.1.1.104 caffeoyl-CoA O-methyltransferase 2.1.1.104 ko00360; Metabolism; Amino acid metabolism; Phenylalanine metabolism | ko00940; Metabolism; Biosynthesis of other secondary metabolites; Phenylpropanoid biosynthesis | ko00945; Metabolism; Biosynthesis of other secondary metabolites; Stilbenoid, diarylheptanoid and gingerol biosynthesis | ko00941; Metabolism; Biosynthes…	{At4g34050; KOG1663 O-methyltransferase Q Secondary metabolites biosynthesis, transport and catabolism ;}	{GO:0008171; O-methyltransferase activity; molecular_function}	{JQ684014.1; Paeonia lactiflora cultivar Hongyanzhenghui caffeoyl-CoA O-methyltransferase mRNA, complete cds}	{PF01596:O-methyltransferase}
transcript_HQ_SAB_transcript26570/f2p0/1175	0.54376	1.358e-06	4.3037e-06	{KNA11912.1; hypothetical protein SOVF_130840 isoform A [Spinacia oleracea]}	{sp|Q500U8|TKPR1_ARATH; Tetraketide alpha-pyrone reductase 1 OS=Arabidopsis thaliana GN=TKPR1 PE=1 SV=1}	{bvg:104890014; - - - - -}	{At5g19440; KOG1502 Flavonol reductase/cinnamoyl-CoA reductase V Defense mechanisms ;}	{GO:0003854; 3-beta-hydroxy-delta5-steroid dehydrogenase activity; molecular_function GO:0003824; NA GO:0016616; oxidoreductase activity, acting on the CH-OH group of donors, NAD or NADP as acceptor; molecular_function GO:0006694; steroid biosynthetic process; biological_process GO:0050662; coenzyme binding; molecular_function GO:0055114; oxidation-reduction process; biological_process}	{XM_010675370.2; PREDICTED: Beta vulgaris subsp. vulgaris dihydroflavonol 4-reductase (LOC104890014), mRNA}	{PF01073:3-beta hydroxysteroid dehydrogenase/isomerase family PF01370:NAD dependent epimerase/dehydratase family}
transcript_HQ_SAB_transcript25898/f2p0/1230	0.7265	3.2576e-08	1.1741e-07	{XP_010673673.1; PREDICTED: cinnamoyl-CoA reductase 1 [Beta vulgaris subsp. vulgaris]}	{sp|Q9S9N9|CCR1_ARATH; Cinnamoyl-CoA reductase 1 OS=Arabidopsis thaliana GN=CCR1 PE=1 SV=1}	{bvg:104890015; - - - - -}	{At5g19440; KOG1502 Flavonol reductase/cinnamoyl-CoA reductase V Defense mechanisms ;}	{GO:0003854; 3-beta-hydroxy-delta5-steroid dehydrogenase activity; molecular_function GO:0003824; NA GO:0016616; oxidoreductase activity, acting on the CH-OH group of donors, NAD or NADP as acceptor; molecular_function GO:0006694; steroid biosynthetic process; biological_process GO:0050662; coenzyme binding; molecular_function GO:0055114; oxidation-reduction process; biological_process}	{XM_010675374.2; PREDICTED: Beta vulgaris subsp. vulgaris cinnamoyl-CoA reductase 1 (LOC104890017), transcript variant X2, mRNA}	{PF01370:NAD dependent epimerase/dehydratase family PF01073:3-beta hydroxysteroid dehydrogenase/isomerase family}
transcript_HQ_SAB_transcript24946/f3p0/1296	1.3704	6.858e-18	4.157e-17	{XP_010665804.1; PREDICTED: anthocyanidin reductase ((2S)-flavan-3-ol-forming) [Beta vulgaris subsp. vulgaris]}	{sp|D7U6G6|ANRPN_VITVI; Anthocyanidin reductase ((2S)-flavan-3-ol-forming) OS=Vitis vinifera GN=ANR PE=3 SV=1}	{pxb:103957850; K08695 ANR anthocyanidin reductase 1.3.1.77 ko00941; Metabolism; Biosynthesis of other secondary metabolites; Flavonoid biosynthesis}	{At1g61720; KOG1502 Flavonol reductase/cinnamoyl-CoA reductase V Defense mechanisms ;}	{GO:0006694; steroid biosynthetic process; biological_process GO:0051287; NAD binding; molecular_function GO:0055114; oxidation-reduction process; biological_process GO:0016620; oxidoreductase activity, acting on the aldehyde or oxo group of donors, NAD or NADP as acceptor; molecular_function GO:0050662; coenzyme binding; molecular_function GO:0003854; 3-beta-hydroxy-delta5-steroid dehydrogenase …	{NA}	{PF01370:NAD dependent epimerase/dehydratase family PF01073:3-beta hydroxysteroid dehydrogenase/isomerase family PF01118:Semialdehyde dehydrogenase, NAD binding domain}
transcript_HQ_SAB_transcript24347/f13p0/1323	-0.53574	2.8705e-21	1.9742e-20	{XP_010673676.1; PREDICTED: cinnamoyl-CoA reductase 1 isoform X2 [Beta vulgaris subsp. vulgaris]}	{sp|Q9S9N9|CCR1_ARATH; Cinnamoyl-CoA reductase 1 OS=Arabidopsis thaliana GN=CCR1 PE=1 SV=1}	{bvg:104890017; - - - - -}	{At5g19440; KOG1502 Flavonol reductase/cinnamoyl-CoA reductase V Defense mechanisms ;}	{GO:0003824; NA GO:0019073; viral DNA genome packaging; biological_process GO:0016616; oxidoreductase activity, acting on the CH-OH group of donors, NAD or NADP as acceptor; molecular_function GO:0003854; 3-beta-hydroxy-delta5-steroid dehydrogenase activity; molecular_function GO:0050662; coenzyme binding; molecular_function GO:0055114; oxidation-reduction process; biological_process GO:0006694; …	{XM_010675374.2; PREDICTED: Beta vulgaris subsp. vulgaris cinnamoyl-CoA reductase 1 (LOC104890017), transcript variant X2, mRNA}	{PF03581:Herpesvirus UL33-like protein PF01370:NAD dependent epimerase/dehydratase family PF01073:3-beta hydroxysteroid dehydrogenase/isomerase family}
transcript_HQ_SAB_transcript24251/f2p0/1341	0.63823	2.2598e-20	1.5029e-19	{XP_010691595.1; PREDICTED: cinnamoyl-CoA reductase 1 [Beta vulgaris subsp. vulgaris]}	{sp|Q9S9N9|CCR1_ARATH; Cinnamoyl-CoA reductase 1 OS=Arabidopsis thaliana GN=CCR1 PE=1 SV=1}	{jcu:105630319; K09753 CCR cinnamoyl-CoA reductase 1.2.1.44 ko00940; Metabolism; Biosynthesis of other secondary metabolites; Phenylpropanoid biosynthesis}	{At1g15950; KOG1502 Flavonol reductase/cinnamoyl-CoA reductase V Defense mechanisms ;}	{GO:0006694; steroid biosynthetic process; biological_process GO:0050662; coenzyme binding; molecular_function GO:0055114; oxidation-reduction process; biological_process GO:0003854; 3-beta-hydroxy-delta5-steroid dehydrogenase activity; molecular_function GO:0003824; NA GO:0016616; oxidoreductase activity, acting on the CH-OH group of donors, NAD or NADP as acceptor; molecular_function}	{XM_010693293.2; PREDICTED: Beta vulgaris subsp. vulgaris cinnamoyl-CoA reductase 1 (LOC104904880), mRNA}	{PF01370:NAD dependent epimerase/dehydratase family PF01073:3-beta hydroxysteroid dehydrogenase/isomerase family}
transcript_HQ_SAB_transcript23625/f2p0/1388	0.56296	0.0026533	0.0057209	{XP_010695556.1; PREDICTED: cinnamoyl-CoA reductase-like SNL6 [Beta vulgaris subsp. vulgaris]}	{sp|Q0JKZ0|SNL6_ORYSJ; Cinnamoyl-CoA reductase-like SNL6 OS=Oryza sativa subsp. japonica GN=SNL6 PE=3 SV=1}	{pop:POPTR_0001s02320g; - - - - -}	{At2g23910; KOG1502 Flavonol reductase/cinnamoyl-CoA reductase V Defense mechanisms ;}	{GO:0016616; oxidoreductase activity, acting on the CH-OH group of donors, NAD or NADP as acceptor; molecular_function GO:0003824; NA GO:0003854; 3-beta-hydroxy-delta5-steroid dehydrogenase activity; molecular_function GO:0055114; oxidation-reduction process; biological_process GO:0050662; coenzyme binding; molecular_function GO:0006694; steroid biosynthetic process; biological_process}	{XM_010697254.2; PREDICTED: Beta vulgaris subsp. vulgaris cinnamoyl-CoA reductase-like SNL6 (LOC104908171), mRNA}	{PF01370:NAD dependent epimerase/dehydratase family PF01073:3-beta hydroxysteroid dehydrogenase/isomerase family}
transcript_HQ_SAB_transcript23501/f3p0/1420	-2.1452	0.0010692	0.0024414	{KNA07730.1; hypothetical protein SOVF_168400 [Spinacia oleracea]}	{sp|P31655|CADH2_EUCGU; Probable cinnamyl alcohol dehydrogenase 2 OS=Eucalyptus gunnii GN=CAD2 PE=2 SV=1}	{jcu:105637089; K00083 E1.1.1.195 cinnamyl-alcohol dehydrogenase 1.1.1.195 ko00940; Metabolism; Biosynthesis of other secondary metabolites; Phenylpropanoid biosynthesis}	{At4g34230; KOG0023 Alcohol dehydrogenase, class V Q Secondary metabolites biosynthesis, transport and catabolism ;}	{GO:0004616; phosphogluconate dehydrogenase (decarboxylating) activity; molecular_function GO:0051287; NAD binding; molecular_function GO:0055114; oxidation-reduction process; biological_process}	{XM_010693369.2; PREDICTED: Beta vulgaris subsp. vulgaris probable cinnamyl alcohol dehydrogenase 1 (LOC104904943), mRNA}	{PF03446:NAD binding domain of 6-phosphogluconate dehydrogenase PF02826:D-isomer specific 2-hydroxyacid dehydrogenase, NAD binding domain PF00107:Zinc-binding dehydrogenase PF08240:Alcohol dehydrogenase GroES-like domain}
transcript_HQ_SAB_transcript23396/f17p0/1384	0.82187	1.0691e-37	1.1643e-36	{KNA15947.1; hypothetical protein SOVF_093740 [Spinacia oleracea]}	{sp|Q8GU25|COMT1_ROSCH; Caffeic acid 3-O-methyltransferase OS=Rosa chinensis GN=COMT1 PE=2 SV=1}	{bvg:104888149; K13066 E2.1.1.68, COMT caffeic acid 3-O-methyltransferase 2.1.1.68 ko00940; Metabolism; Biosynthesis of other secondary metabolites; Phenylpropanoid biosynthesis}	{At5g54160; KOG3178 Hydroxyindole-O-methyltransferase and related SAM-dependent methyltransferases R General function prediction only ;}	{GO:0008171; O-methyltransferase activity; molecular_function GO:0046983; protein dimerization activity; molecular_function GO:0006480; N-terminal protein amino acid methylation; biological_process GO:0008168; methyltransferase activity; molecular_function}	{XM_010673030.2; PREDICTED: Beta vulgaris subsp. vulgaris caffeic acid 3-O-methyltransferase (LOC104888149), mRNA}	{PF00891:O-methyltransferase PF06859:Bicoid-interacting protein 3 (Bin3) PF05891:AdoMet dependent proline di-methyltransferase PF08100:Dimerisation domain}
transcript_HQ_SAB_transcript22621/f2p0/1459	-1.6271	0.0069274	0.013979	{XP_010671333.1; PREDICTED: caffeic acid 3-O-methyltransferase 2 [Beta vulgaris subsp. vulgaris]}	{sp|Q43609|COMT1_PRUDU; Caffeic acid 3-O-methyltransferase OS=Prunus dulcis GN=COMT1 PE=2 SV=1}	{bvg:104888150; K13066 E2.1.1.68, COMT caffeic acid 3-O-methyltransferase 2.1.1.68 ko00940; Metabolism; Biosynthesis of other secondary metabolites; Phenylpropanoid biosynthesis}	{At5g54160; KOG3178 Hydroxyindole-O-methyltransferase and related SAM-dependent methyltransferases R General function prediction only ;}	{GO:0008168; methyltransferase activity; molecular_function GO:0006480; N-terminal protein amino acid methylation; biological_process GO:0046983; protein dimerization activity; molecular_function GO:0008171; O-methyltransferase activity; molecular_function}	{NA}	{PF08100:Dimerisation domain PF05891:AdoMet dependent proline di-methyltransferase PF00891:O-methyltransferase}
transcript_HQ_SAB_transcript22164/f4p0/1488	0.96952	4.9478e-51	7.0921e-50	{KNA19526.1; hypothetical protein SOVF_060840 [Spinacia oleracea]}	{sp|Q9FQY8|COMT1_CAPAN; Caffeic acid 3-O-methyltransferase OS=Capsicum annuum GN=COMT PE=2 SV=2}	{bvg:104902057; K13066 E2.1.1.68, COMT caffeic acid 3-O-methyltransferase 2.1.1.68 ko00940; Metabolism; Biosynthesis of other secondary metabolites; Phenylpropanoid biosynthesis}	{At5g54160; KOG3178 Hydroxyindole-O-methyltransferase and related SAM-dependent methyltransferases R General function prediction only ;}	{GO:0008168; methyltransferase activity; molecular_function GO:0006480; N-terminal protein amino acid methylation; biological_process GO:0046983; protein dimerization activity; molecular_function GO:0008171; O-methyltransferase activity; molecular_function}	{XM_010689755.2; PREDICTED: Beta vulgaris subsp. vulgaris caffeic acid 3-O-methyltransferase (LOC104902057), mRNA}	{PF05891:AdoMet dependent proline di-methyltransferase PF08100:Dimerisation domain PF06859:Bicoid-interacting protein 3 (Bin3) PF00891:O-methyltransferase}
transcript_HQ_SAB_transcript22149/f39p0/1351	0.45745	1.4295e-05	4.0974e-05	{XP_010673676.1; PREDICTED: cinnamoyl-CoA reductase 1 isoform X2 [Beta vulgaris subsp. vulgaris]}	{sp|Q9S9N9|CCR1_ARATH; Cinnamoyl-CoA reductase 1 OS=Arabidopsis thaliana GN=CCR1 PE=1 SV=1}	{bvg:104890017; - - - - -}	{At5g19440; KOG1502 Flavonol reductase/cinnamoyl-CoA reductase V Defense mechanisms ;}	{GO:0055114; oxidation-reduction process; biological_process GO:0050662; coenzyme binding; molecular_function GO:0006694; steroid biosynthetic process; biological_process GO:0019073; viral DNA genome packaging; biological_process GO:0016616; oxidoreductase activity, acting on the CH-OH group of donors, NAD or NADP as acceptor; molecular_function GO:0003824; NA GO:0003854; 3-beta-hydroxy-delta5-st…	{XM_010675374.2; PREDICTED: Beta vulgaris subsp. vulgaris cinnamoyl-CoA reductase 1 (LOC104890017), transcript variant X2, mRNA}	{PF01073:3-beta hydroxysteroid dehydrogenase/isomerase family PF01370:NAD dependent epimerase/dehydratase family PF03581:Herpesvirus UL33-like protein}
transcript_HQ_SAB_transcript21986/f2p0/1493	-1.3911	5.3489e-21	3.6479e-20	{XP_010683979.1; PREDICTED: caffeic acid 3-O-methyltransferase [Beta vulgaris subsp. vulgaris]}	{sp|Q43609|COMT1_PRUDU; Caffeic acid 3-O-methyltransferase OS=Prunus dulcis GN=COMT1 PE=2 SV=1}	{egr:104438876; - - - - -}	{At3g53140; KOG3178 Hydroxyindole-O-methyltransferase and related SAM-dependent methyltransferases R General function prediction only ;}	{GO:0008171; O-methyltransferase activity; molecular_function GO:0046983; protein dimerization activity; molecular_function GO:0008168; methyltransferase activity; molecular_function}	{XM_010685677.2; PREDICTED: Beta vulgaris subsp. vulgaris caffeic acid 3-O-methyltransferase (LOC104898582), mRNA}	{PF00891:O-methyltransferase PF08100:Dimerisation domain PF06859:Bicoid-interacting protein 3 (Bin3)}
transcript_HQ_SAB_transcript21043/f2p0/1562	-1.1731	1.8556e-166	8.9918e-165	{KNA18512.1; hypothetical protein SOVF_069860 [Spinacia oleracea]}	{sp|P52409|E13B_WHEAT; Glucan endo-1,3-Beta-glucosidase OS=Triticum aestivum GN=GLC1 PE=2 SV=1}	{bvg:104904063; - - - - -}	{NA}	{GO:0004553; hydrolase activity, hydrolyzing O-glycosyl compounds; molecular_function GO:0005975; carbohydrate metabolic process; biological_process}	{XM_010692248.2; PREDICTED: Beta vulgaris subsp. vulgaris glucan endo-1,3-Beta-glucosidase (LOC104904063), mRNA}	{PF00332:Glycosyl hydrolases family 17}
transcript_HQ_SAB_transcript20996/f3p0/1565	1.4071	6.4172e-08	2.2692e-07	{KNA07730.1; hypothetical protein SOVF_168400 [Spinacia oleracea]}	{sp|P30359|CADH1_TOBAC; Probable cinnamyl alcohol dehydrogenase 1 OS=Nicotiana tabacum GN=CAD14 PE=1 SV=1}	{jcu:105637089; K00083 E1.1.1.195 cinnamyl-alcohol dehydrogenase 1.1.1.195 ko00940; Metabolism; Biosynthesis of other secondary metabolites; Phenylpropanoid biosynthesis}	{At4g34230; KOG0023 Alcohol dehydrogenase, class V Q Secondary metabolites biosynthesis, transport and catabolism ;}	{GO:0004616; phosphogluconate dehydrogenase (decarboxylating) activity; molecular_function GO:0051287; NAD binding; molecular_function GO:0055114; oxidation-reduction process; biological_process}	{XM_010693369.2; PREDICTED: Beta vulgaris subsp. vulgaris probable cinnamyl alcohol dehydrogenase 1 (LOC104904943), mRNA}	{PF08240:Alcohol dehydrogenase GroES-like domain PF03446:NAD binding domain of 6-phosphogluconate dehydrogenase PF00107:Zinc-binding dehydrogenase PF02826:D-isomer specific 2-hydroxyacid dehydrogenase, NAD binding domain}
transcript_HQ_SAB_transcript20954/f5p0/1558	0.49084	0.0033385	0.0070877	{KNA05086.1; hypothetical protein SOVF_193680 [Spinacia oleracea]}	{sp|P52409|E13B_WHEAT; Glucan endo-1,3-Beta-glucosidase OS=Triticum aestivum GN=GLC1 PE=2 SV=1}	{rcu:8278071; - - - - -}	{NA}	{GO:0005975; carbohydrate metabolic process; biological_process GO:0004553; hydrolase activity, hydrolyzing O-glycosyl compounds; molecular_function}	{AJ251646.1; Pisum sativum mRNA for beta-1,3 glucanase (gns2 gene)}	{PF00332:Glycosyl hydrolases family 17}
transcript_HQ_SAB_transcript19435/f2p0/1662	-7.8662	5.3752e-18	3.2691e-17	{XP_010683005.1; PREDICTED: caffeic acid 3-O-methyltransferase isoform X2 [Beta vulgaris subsp. vulgaris]}	{sp|Q8W013|COMT1_CATRO; Caffeic acid 3-O-methyltransferase OS=Catharanthus roseus GN=COMT1 PE=2 SV=1}	{bvg:104902057; K13066 E2.1.1.68, COMT caffeic acid 3-O-methyltransferase 2.1.1.68 ko00940; Metabolism; Biosynthesis of other secondary metabolites; Phenylpropanoid biosynthesis}	{At5g54160; KOG3178 Hydroxyindole-O-methyltransferase and related SAM-dependent methyltransferases R General function prediction only ;}	{GO:0008168; methyltransferase activity; molecular_function GO:0008152; NA GO:0006355; regulation of transcription, DNA-dependent; biological_process GO:0003700; sequence-specific DNA binding transcription factor activity; molecular_function GO:0008171; O-methyltransferase activity; molecular_function GO:0046983; protein dimerization activity; molecular_function GO:0006480; N-terminal protein ami…	{XM_010036609.2; PREDICTED: Eucalyptus grandis caffeic acid 3-O-methyltransferase 1 (LOC104424243), mRNA}	{PF00891:O-methyltransferase PF01047:MarR family PF05891:AdoMet dependent proline di-methyltransferase PF08100:Dimerisation domain PF08241:Methyltransferase domain}
transcript_HQ_SAB_transcript17432/f3p0/1776	0.82517	3.9665e-07	1.3156e-06	{XP_010673492.1; PREDICTED: glucan endo-1,3-Beta-glucosidase 4 [Beta vulgaris subsp. vulgaris]}	{sp|Q94CD8|E134_ARATH; Glucan endo-1,3-Beta-glucosidase 4 OS=Arabidopsis thaliana GN=At3g13560 PE=1 SV=1}	{bvg:104889860; K19892 GN4 glucan endo-1,3-Beta-glucosidase 4 3.2.1.39 ko00500; Metabolism; Carbohydrate metabolism; Starch and sucrose metabolism}	{NA}	{GO:0005975; carbohydrate metabolic process; biological_process GO:0004553; hydrolase activity, hydrolyzing O-glycosyl compounds; molecular_function}	{XM_019248820.1; PREDICTED: Beta vulgaris subsp. vulgaris glucan endo-1,3-Beta-glucosidase 4 (LOC104889860), transcript variant X2, mRNA}	{PF00332:Glycosyl hydrolases family 17}
transcript_HQ_SAB_transcript17070/f2p0/1803	2.781	2.8913e-10	1.1964e-09	{XP_010673860.1; PREDICTED: Beta-glucosidase 42 isoform X1 [Beta vulgaris subsp. vulgaris]}	{sp|Q9FIW4|BGL42_ARATH; Beta-glucosidase 42 OS=Arabidopsis thaliana GN=BGLU42 PE=2 SV=1}	{bvg:104890172; K01188 E3.2.1.21 Beta-glucosidase 3.2.1.21 ko00500; Metabolism; Carbohydrate metabolism; Starch and sucrose metabolism | ko00460; Metabolism; Metabolism of other amino acids; Cyanoamino acid metabolism | ko00940; Metabolism; Biosynthesis of other secondary metabolites; Phenylpropanoid biosynthesis}	{At5g36890; KOG0626 Beta-glucosidase, lactase phlorizinhydrolase, and related proteins G Carbohydrate transport and metabolism ;}	{GO:0004553; hydrolase activity, hydrolyzing O-glycosyl compounds; molecular_function GO:0005975; carbohydrate metabolic process; biological_process}	{XM_010675558.2; PREDICTED: Beta vulgaris subsp. vulgaris Beta-glucosidase 42 (LOC104890172), transcript variant X1, mRNA}	{PF00150:Cellulase (glycosyl hydrolase family 5) PF00232:Glycosyl hydrolase family 1}
transcript_HQ_SAB_transcript17028/f2p0/1789	3.7057	1.8129e-12	8.5573e-12	{XP_010685886.1; PREDICTED: laccase-3-like [Beta vulgaris subsp. vulgaris]}	{sp|Q56YT0|LAC3_ARATH; Laccase-3 OS=Arabidopsis thaliana GN=LAC3 PE=2 SV=2}	{jcu:105640681; K05909 E1.10.3.2 laccase 1.10.3.2 -}	{At2g30210; KOG1263 Multicopper oxidases Q Secondary metabolites biosynthesis, transport and catabolism ;}	{GO:0055114; oxidation-reduction process; biological_process GO:0005507; copper ion binding; molecular_function GO:0016491; oxidoreductase activity; molecular_function}	{XM_019251034.1; PREDICTED: Beta vulgaris subsp. vulgaris laccase-3-like (LOC104900210), transcript variant X2, mRNA}	{PF00394:Multicopper oxidase PF07731:Multicopper oxidase PF07732:Multicopper oxidase}
transcript_HQ_SAB_transcript16758/f2p0/1760	-1.6374	8.4649e-13	4.0814e-12	{KNA05014.1; hypothetical protein SOVF_194390 [Spinacia oleracea]}	{sp|A1CRV0|EXGA_ASPCL; Probable glucan 1,3-Beta-glucosidase A OS=Aspergillus clavatus (strain ATCC 1007 / CBS 513.65 / DSM 816 / NCTC 3887 / NRRL 1) GN=exgA PE=3 SV=2}	{cit:102627395; - - - - -}	{NA}	{GO:0019385; methanogenesis, from acetate; biological_process GO:0004553; hydrolase activity, hydrolyzing O-glycosyl compounds; molecular_function GO:0005975; carbohydrate metabolic process; biological_process GO:0051015; actin filament binding; molecular_function GO:0030674; protein binding, bridging; molecular_function}	{XM_010682727.2; PREDICTED: Beta vulgaris subsp. vulgaris glucan 1,3-Beta-glucosidase A (LOC104896043), transcript variant X2, mRNA}	{PF06268:Fascin domain PF02552:CO dehydrogenase beta subunit/acetyl-CoA synthase epsilon subunit PF00150:Cellulase (glycosyl hydrolase family 5)}
transcript_HQ_SAB_transcript16600/f3p0/1822	-0.36763	0.0074773	0.015004	{KNA22687.1; hypothetical protein SOVF_032040 [Spinacia oleracea]}	{sp|Q94CD8|E134_ARATH; Glucan endo-1,3-Beta-glucosidase 4 OS=Arabidopsis thaliana GN=At3g13560 PE=1 SV=1}	{bvg:104889860; K19892 GN4 glucan endo-1,3-Beta-glucosidase 4 3.2.1.39 ko00500; Metabolism; Carbohydrate metabolism; Starch and sucrose metabolism}	{NA}	{NA}	{XM_018637721.1; PREDICTED: Raphanus sativus glucan endo-1,3-Beta-glucosidase 4 (LOC108863329), mRNA}	{NA}
transcript_HQ_SAB_transcript16417/f2p0/1856	2.2951	1.9712e-21	1.3633e-20	{KNA25154.1; hypothetical protein SOVF_008800 [Spinacia oleracea]}	{sp|B8AVF0|BGL12_ORYSI; Beta-glucosidase 12 OS=Oryza sativa subsp. indica GN=BGLU12 PE=3 SV=1}	{bvg:104889924; K01188 E3.2.1.21 Beta-glucosidase 3.2.1.21 ko00500; Metabolism; Carbohydrate metabolism; Starch and sucrose metabolism | ko00460; Metabolism; Metabolism of other amino acids; Cyanoamino acid metabolism | ko00940; Metabolism; Biosynthesis of other secondary metabolites; Phenylpropanoid biosynthesis}	{At2g44480; KOG0626 Beta-glucosidase, lactase phlorizinhydrolase, and related proteins G Carbohydrate transport and metabolism ;}	{GO:0004553; hydrolase activity, hydrolyzing O-glycosyl compounds; molecular_function GO:0005975; carbohydrate metabolic process; biological_process}	{XM_012237400.1; PREDICTED: Jatropha curcas Beta-glucosidase 12-like (LOC105650486), mRNA}	{PF00232:Glycosyl hydrolase family 1}
transcript_HQ_SAB_transcript16343/f3p0/1836	-1.435	4.1887e-12	1.9319e-11	{KNA05578.1; hypothetical protein SOVF_189070 [Spinacia oleracea]}	{sp|Q9ZU91|E133_ARATH; Glucan endo-1,3-Beta-glucosidase 3 OS=Arabidopsis thaliana GN=At2g01630 PE=1 SV=2}	{vvi:100261876; - - - - -}	{NA}	{GO:0005975; carbohydrate metabolic process; biological_process GO:0004553; hydrolase activity, hydrolyzing O-glycosyl compounds; molecular_function}	{XM_009397605.2; PREDICTED: Musa acuminata subsp. malaccensis glucan endo-1,3-Beta-glucosidase 6-like (LOC103981031), mRNA}	{PF00332:Glycosyl hydrolases family 17}
transcript_HQ_SAB_transcript16193/f2p0/1850	0.44094	0.00083291	0.0019311	{KNA25154.1; hypothetical protein SOVF_008800 [Spinacia oleracea]}	{sp|Q7XKV4|BGL12_ORYSJ; Beta-glucosidase 12 OS=Oryza sativa subsp. japonica GN=BGLU12 PE=1 SV=2}	{bvg:104889924; K01188 E3.2.1.21 Beta-glucosidase 3.2.1.21 ko00500; Metabolism; Carbohydrate metabolism; Starch and sucrose metabolism | ko00460; Metabolism; Metabolism of other amino acids; Cyanoamino acid metabolism | ko00940; Metabolism; Biosynthesis of other secondary metabolites; Phenylpropanoid biosynthesis}	{At2g44450; KOG0626 Beta-glucosidase, lactase phlorizinhydrolase, and related proteins G Carbohydrate transport and metabolism ;}	{GO:0004553; hydrolase activity, hydrolyzing O-glycosyl compounds; molecular_function GO:0005975; carbohydrate metabolic process; biological_process}	{XM_002285546.3; PREDICTED: Vitis vinifera Beta-glucosidase 12-like (LOC100260409), mRNA}	{PF00232:Glycosyl hydrolase family 1}
transcript_HQ_SAB_transcript15960/f5p0/1843	-1.2651	1.2992e-07	4.4866e-07	{KNA05578.1; hypothetical protein SOVF_189070 [Spinacia oleracea]}	{sp|Q9ZU91|E133_ARATH; Glucan endo-1,3-Beta-glucosidase 3 OS=Arabidopsis thaliana GN=At2g01630 PE=1 SV=2}	{vvi:100261876; - - - - -}	{NA}	{GO:0005975; carbohydrate metabolic process; biological_process GO:0004553; hydrolase activity, hydrolyzing O-glycosyl compounds; molecular_function}	{XM_009397605.2; PREDICTED: Musa acuminata subsp. malaccensis glucan endo-1,3-Beta-glucosidase 6-like (LOC103981031), mRNA}	{PF00332:Glycosyl hydrolases family 17}
transcript_HQ_SAB_transcript15462/f4p0/1888	-0.25989	0.013537	0.025822	{KNA14431.1; hypothetical protein SOVF_106700 [Spinacia oleracea]}	{sp|Q9C942|CSE_ARATH; Caffeoylshikimate esterase OS=Arabidopsis thaliana GN=CSE PE=1 SV=1}	{bvg:104885641; K01054 MGLL acylglycerol lipase 3.1.1.23 ko00561; Metabolism; Lipid metabolism; Glycerolipid metabolism | ko04923; Organismal Systems; Endocrine system; Regulation of lipolysis in adipocytes | ko04723; Organismal Systems; Nervous system; Retrograde endocannabinoid signaling}	{At5g11650; KOG1455 Lysophospholipase I Lipid transport and metabolism ;}	{GO:0016787; hydrolase activity; molecular_function GO:0009058; biosynthetic process; biological_process GO:0016788; hydrolase activity, acting on ester bonds; molecular_function}	{XR_002038812.1; PREDICTED: Beta vulgaris subsp. vulgaris monoacylglycerol lipase (LOC104885641), transcript variant X2, misc_RNA}	{PF06821:Serine hydrolase PF00975:Thioesterase domain}
transcript_HQ_SAB_transcript15105/f2p0/1932	-0.45055	1.2354e-10	5.2436e-10	{KNA05086.1; hypothetical protein SOVF_193680 [Spinacia oleracea]}	{sp|P52409|E13B_WHEAT; Glucan endo-1,3-Beta-glucosidase OS=Triticum aestivum GN=GLC1 PE=2 SV=1}	{rcu:8278071; - - - - -}	{NA}	{GO:0004553; hydrolase activity, hydrolyzing O-glycosyl compounds; molecular_function GO:0005975; carbohydrate metabolic process; biological_process}	{XM_010687459.2; PREDICTED: Beta vulgaris subsp. vulgaris glucan endo-1,3-Beta-glucosidase (LOC104900112), mRNA}	{PF00332:Glycosyl hydrolases family 17}
transcript_HQ_SAB_transcript14823/f3p0/1932	0.97641	4.2835e-12	1.973e-11	{XP_010677906.1; PREDICTED: Beta-glucosidase 13 [Beta vulgaris subsp. vulgaris]}	{sp|Q7XKV4|BGL12_ORYSJ; Beta-glucosidase 12 OS=Oryza sativa subsp. japonica GN=BGLU12 PE=1 SV=2}	{bvg:104893501; K01188 E3.2.1.21 Beta-glucosidase 3.2.1.21 ko00500; Metabolism; Carbohydrate metabolism; Starch and sucrose metabolism | ko00460; Metabolism; Metabolism of other amino acids; Cyanoamino acid metabolism | ko00940; Metabolism; Biosynthesis of other secondary metabolites; Phenylpropanoid biosynthesis}	{At3g60130; KOG0626 Beta-glucosidase, lactase phlorizinhydrolase, and related proteins G Carbohydrate transport and metabolism ;}	{GO:0004553; hydrolase activity, hydrolyzing O-glycosyl compounds; molecular_function GO:0005975; carbohydrate metabolic process; biological_process}	{XM_010679604.2; PREDICTED: Beta vulgaris subsp. vulgaris Beta-glucosidase 13 (LOC104893501), mRNA}	{PF00232:Glycosyl hydrolase family 1 PF00150:Cellulase (glycosyl hydrolase family 5)}
transcript_HQ_SAB_transcript14751/f2p0/1936	3.1238	0.00045208	0.0010832	{XP_010676988.1; PREDICTED: probable glucan 1,3-Beta-glucosidase A [Beta vulgaris subsp. vulgaris]}	{sp|A2RAR6|EXGA_ASPNC; Probable glucan 1,3-Beta-glucosidase A OS=Aspergillus niger (strain CBS 513.88 / FGSC A1513) GN=exgA PE=3 SV=1}	{bvg:104892694; - - - - -}	{NA}	{GO:0004565; beta-galactosidase activity; molecular_function GO:0051015; actin filament binding; molecular_function GO:0030674; protein binding, bridging; molecular_function GO:0004553; hydrolase activity, hydrolyzing O-glycosyl compounds; molecular_function GO:0009341; beta-galactosidase complex; cellular_component GO:0005975; carbohydrate metabolic process; biological_process}	{XM_010678686.2; PREDICTED: Beta vulgaris subsp. vulgaris probable glucan 1,3-Beta-glucosidase A (LOC104892694), mRNA}	{PF02449:Beta-galactosidase PF06268:Fascin domain PF00150:Cellulase (glycosyl hydrolase family 5)}
transcript_HQ_SAB_transcript13932/f4p0/1909	-0.76244	5.1433e-96	1.4186e-94	{XP_010690550.1; PREDICTED: glucan endo-1,3-Beta-glucosidase [Beta vulgaris subsp. vulgaris]}	{sp|P52409|E13B_WHEAT; Glucan endo-1,3-Beta-glucosidase OS=Triticum aestivum GN=GLC1 PE=2 SV=1}	{bvg:104904063; - - - - -}	{NA}	{GO:0005975; carbohydrate metabolic process; biological_process GO:0004553; hydrolase activity, hydrolyzing O-glycosyl compounds; molecular_function}	{XM_010692248.2; PREDICTED: Beta vulgaris subsp. vulgaris glucan endo-1,3-Beta-glucosidase (LOC104904063), mRNA}	{PF00332:Glycosyl hydrolases family 17}
transcript_HQ_SAB_transcript13675/f2p0/2013	-1.7053	0.0016392	0.0036413	{XP_010681610.1; PREDICTED: caffeoylshikimate esterase isoform X1 [Beta vulgaris subsp. vulgaris]}	{sp|Q9C942|CSE_ARATH; Caffeoylshikimate esterase OS=Arabidopsis thaliana GN=CSE PE=1 SV=1}	{nnu:104602105; K01054 MGLL acylglycerol lipase 3.1.1.23 ko00561; Metabolism; Lipid metabolism; Glycerolipid metabolism | ko04923; Organismal Systems; Endocrine system; Regulation of lipolysis in adipocytes | ko04723; Organismal Systems; Nervous system; Retrograde endocannabinoid signaling}	{At1g77420; KOG1455 Lysophospholipase I Lipid transport and metabolism ;}	{GO:0006508; proteolysis; biological_process GO:0016787; hydrolase activity; molecular_function GO:0009058; biosynthetic process; biological_process GO:0008236; serine-type peptidase activity; molecular_function GO:0016788; hydrolase activity, acting on ester bonds; molecular_function}	{XM_010683308.2; PREDICTED: Beta vulgaris subsp. vulgaris caffeoylshikimate esterase (LOC104896551), transcript variant X1, mRNA}	{PF02230:Phospholipase/Carboxylesterase PF01738:Dienelactone hydrolase family PF00975:Thioesterase domain PF00326:Prolyl oligopeptidase family PF02129:X-Pro dipeptidyl-peptidase (S15 family)}
transcript_HQ_SAB_transcript12756/f6p0/2071	3.0385	9.7496e-69	1.8608e-67	{XP_010685719.1; PREDICTED: laccase-17 [Beta vulgaris subsp. vulgaris]}	{sp|Q9FJD5|LAC17_ARATH; Laccase-17 OS=Arabidopsis thaliana GN=LAC17 PE=2 SV=1}	{nnu:104597151; K05909 E1.10.3.2 laccase 1.10.3.2 -}	{At5g60020; KOG1263 Multicopper oxidases Q Secondary metabolites biosynthesis, transport and catabolism ;}	{GO:0055114; oxidation-reduction process; biological_process GO:0005507; copper ion binding; molecular_function GO:0016491; oxidoreductase activity; molecular_function}	{XM_010687417.2; PREDICTED: Beta vulgaris subsp. vulgaris laccase-17 (LOC104900080), mRNA}	{PF07731:Multicopper oxidase PF07732:Multicopper oxidase PF00394:Multicopper oxidase}
transcript_HQ_SAB_transcript12243/f3p0/2115	-2.2345	0.0015635	0.0034831	{XP_010677904.1; PREDICTED: Beta-glucosidase 13 [Beta vulgaris subsp. vulgaris]}	{sp|B8AVF0|BGL12_ORYSI; Beta-glucosidase 12 OS=Oryza sativa subsp. indica GN=BGLU12 PE=3 SV=1}	{bvg:104893499; K01188 E3.2.1.21 Beta-glucosidase 3.2.1.21 ko00500; Metabolism; Carbohydrate metabolism; Starch and sucrose metabolism | ko00460; Metabolism; Metabolism of other amino acids; Cyanoamino acid metabolism | ko00940; Metabolism; Biosynthesis of other secondary metabolites; Phenylpropanoid biosynthesis}	{At3g60130; KOG0626 Beta-glucosidase, lactase phlorizinhydrolase, and related proteins G Carbohydrate transport and metabolism ;}	{GO:0005975; carbohydrate metabolic process; biological_process GO:0004553; hydrolase activity, hydrolyzing O-glycosyl compounds; molecular_function}	{XM_010679602.2; PREDICTED: Beta vulgaris subsp. vulgaris Beta-glucosidase 13 (LOC104893499), mRNA}	{PF00232:Glycosyl hydrolase family 1 PF00150:Cellulase (glycosyl hydrolase family 5)}
transcript_HQ_SAB_transcript12143/f2p0/2115	1.0998	4.5705e-14	2.337e-13	{XP_010679832.1; PREDICTED: cytochrome P450 84A1 [Beta vulgaris subsp. vulgaris]}	{sp|Q42600|C84A1_ARATH; Cytochrome P450 84A1 OS=Arabidopsis thaliana GN=CYP84A1 PE=1 SV=1}	{cic:CICLE_v10025382mg; K09755 CYP84A, F5H ferulate-5-hydroxylase 1.14.-.- ko00940; Metabolism; Biosynthesis of other secondary metabolites; Phenylpropanoid biosynthesis}	{At4g36220; KOG0156 Cytochrome P450 CYP2 subfamily Q Secondary metabolites biosynthesis, transport and catabolism ;}	{GO:0055114; oxidation-reduction process; biological_process GO:0016705; oxidoreductase activity, acting on paired donors, with incorporation or reduction of molecular oxygen; molecular_function GO:0020037; heme binding; molecular_function GO:0005506; iron ion binding; molecular_function}	{XM_010681530.2; PREDICTED: Beta vulgaris subsp. vulgaris cytochrome P450 84A1 (LOC104895114), mRNA}	{PF00067:Cytochrome P450}
transcript_HQ_SAB_transcript11930/f3p0/2148	1.5585	9.0437e-08	3.163e-07	{XP_010688496.1; PREDICTED: 4-coumarate--CoA ligase 1 [Beta vulgaris subsp. vulgaris]}	{sp|P31684|4CL1_SOLTU; 4-coumarate--CoA ligase 1 OS=Solanum tuberosum GN=4CL1 PE=3 SV=1}	{vvi:100254698; K01904 4CL 4-coumarate--CoA ligase 6.2.1.12 ko00360; Metabolism; Amino acid metabolism; Phenylalanine metabolism | ko00130; Metabolism; Metabolism of cofactors and vitamins; Ubiquinone and other terpenoid-quinone biosynthesis | ko00940; Metabolism; Biosynthesis of other secondary metabolites; Phenylpropanoid biosynthesis}	{At1g51680; KOG1176 Acyl-CoA synthetase I Lipid transport and metabolism ;}	{GO:0008152; NA GO:0003824; NA}	{XM_010690194.2; PREDICTED: Beta vulgaris subsp. vulgaris 4-coumarate--CoA ligase 1 (LOC104902419), mRNA}	{PF00501:AMP-binding enzyme}
transcript_HQ_SAB_transcript11064/f7p0/2203	2.2722	1.2244e-18	7.6376e-18	{KNA07968.1; hypothetical protein SOVF_167000 [Spinacia oleracea]}	{sp|Q9FLB5|LAC12_ARATH; Laccase-12 OS=Arabidopsis thaliana GN=LAC12 PE=2 SV=1}	{vvi:100262045; K05909 E1.10.3.2 laccase 1.10.3.2 -}	{At5g05390; KOG1263 Multicopper oxidases Q Secondary metabolites biosynthesis, transport and catabolism ;}	{GO:0016491; oxidoreductase activity; molecular_function GO:0055114; oxidation-reduction process; biological_process GO:0005507; copper ion binding; molecular_function}	{XM_010694615.2; PREDICTED: Beta vulgaris subsp. vulgaris laccase-12 (LOC104905953), mRNA}	{PF07732:Multicopper oxidase PF07731:Multicopper oxidase PF00394:Multicopper oxidase}
transcript_HQ_SAB_transcript10967/f4p0/2201	-0.66731	2.9962e-12	1.3971e-11	{KNA18219.1; hypothetical protein SOVF_072660 [Spinacia oleracea]}	{sp|Q84P21|4CLL5_ARATH; 4-coumarate--CoA ligase-like 5 OS=Arabidopsis thaliana GN=4CLL5 PE=1 SV=2}	{sind:105177940; K10526 OPCL1 OPC-8:0 CoA ligase 1 6.2.1.- ko00592; Metabolism; Lipid metabolism; alpha-Linolenic acid metabolism}	{At1g20510; KOG1176 Acyl-CoA synthetase I Lipid transport and metabolism ;}	{GO:0008152; NA GO:0003824; NA}	{XM_010694547.2; PREDICTED: Beta vulgaris subsp. vulgaris 4-coumarate--CoA ligase-like 5 (LOC104905891), transcript variant X1, mRNA}	{PF00501:AMP-binding enzyme}
transcript_HQ_SAB_transcript10680/f3p0/2237	0.96564	1.3623e-10	5.7657e-10	{XP_010677916.1; PREDICTED: 4-coumarate--CoA ligase-like 9 [Beta vulgaris subsp. vulgaris]}	{sp|Q84P23|4CLL9_ARATH; 4-coumarate--CoA ligase-like 9 OS=Arabidopsis thaliana GN=4CLL9 PE=1 SV=2}	{bvg:104893505; - - - - -}	{At5g63380; KOG1176 Acyl-CoA synthetase I Lipid transport and metabolism ;}	{GO:0003824; NA GO:0008152; NA}	{XM_010679614.2; PREDICTED: Beta vulgaris subsp. vulgaris 4-coumarate--CoA ligase-like 9 (LOC104893505), mRNA}	{PF00501:AMP-binding enzyme}
transcript_HQ_SAB_transcript10444/f7p0/2215	1.0863	2.8837e-08	1.0438e-07	{XP_010677916.1; PREDICTED: 4-coumarate--CoA ligase-like 9 [Beta vulgaris subsp. vulgaris]}	{sp|Q84P23|4CLL9_ARATH; 4-coumarate--CoA ligase-like 9 OS=Arabidopsis thaliana GN=4CLL9 PE=1 SV=2}	{bvg:104893505; - - - - -}	{At5g63380; KOG1176 Acyl-CoA synthetase I Lipid transport and metabolism ;}	{GO:0003824; NA GO:0008152; NA}	{XM_010679614.2; PREDICTED: Beta vulgaris subsp. vulgaris 4-coumarate--CoA ligase-like 9 (LOC104893505), mRNA}	{PF00501:AMP-binding enzyme}
transcript_HQ_SAB_transcript10225/f3p0/2280	0.41312	4.8524e-05	0.00013102	{XP_010685489.1; PREDICTED: uncharacterized protein LOC104899896 [Beta vulgaris subsp. vulgaris]}	{sp|A7LXU3|BGH3B_BACO1; Beta-glucosidase BoGH3B OS=Bacteroides ovatus (strain ATCC 8483 / DSM 1896 / JCM 5824 / NCTC 11153) GN=BACOVA_02659 PE=1 SV=1}	{cic:CICLE_v10028018mg; K05349 bglX Beta-glucosidase 3.2.1.21 ko00500; Metabolism; Carbohydrate metabolism; Starch and sucrose metabolism | ko00460; Metabolism; Metabolism of other amino acids; Cyanoamino acid metabolism | ko00940; Metabolism; Biosynthesis of other secondary metabolites; Phenylpropanoid biosynthesis}	{NA}	{GO:0005975; carbohydrate metabolic process; biological_process GO:0004553; hydrolase activity, hydrolyzing O-glycosyl compounds; molecular_function}	{XM_010687187.2; PREDICTED: Beta vulgaris subsp. vulgaris Beta-glucosidase BoGH3B (LOC104899896), mRNA}	{PF01915:Glycosyl hydrolase family 3 C-terminal domain PF00933:Glycosyl hydrolase family 3 N terminal domain}
transcript_HQ_BAB_transcript7059/f7p0/2941	#NAME?	0.00020273	0.00050767	{XP_010672074.1; PREDICTED: glucan endo-1,3-Beta-glucosidase 8 [Beta vulgaris subsp. vulgaris]}	{sp|Q6NKW9|E138_ARATH; Glucan endo-1,3-Beta-glucosidase 8 OS=Arabidopsis thaliana GN=At1g64760 PE=1 SV=2}	{bvg:104888732; - - - - -}	{NA}	{GO:0005975; carbohydrate metabolic process; biological_process GO:0004553; hydrolase activity, hydrolyzing O-glycosyl compounds; molecular_function}	{XM_010673772.2; PREDICTED: Beta vulgaris subsp. vulgaris glucan endo-1,3-Beta-glucosidase 8 (LOC104888732), mRNA}	{PF00332:Glycosyl hydrolases family 17}
transcript_HQ_BAB_transcript6740/f5p0/2912	0.36458	1.1891e-07	4.1214e-07	{XP_010672074.1; PREDICTED: glucan endo-1,3-Beta-glucosidase 8 [Beta vulgaris subsp. vulgaris]}	{sp|Q6NKW9|E138_ARATH; Glucan endo-1,3-Beta-glucosidase 8 OS=Arabidopsis thaliana GN=At1g64760 PE=1 SV=2}	{bvg:104888732; - - - - -}	{NA}	{GO:0004553; hydrolase activity, hydrolyzing O-glycosyl compounds; molecular_function GO:0005975; carbohydrate metabolic process; biological_process}	{XM_010673772.2; PREDICTED: Beta vulgaris subsp. vulgaris glucan endo-1,3-Beta-glucosidase 8 (LOC104888732), mRNA}	{PF00332:Glycosyl hydrolases family 17}
transcript_HQ_BAB_transcript5522/f2p0/3127	0.3292	0.011261	0.021814	{KNA10356.1; hypothetical protein SOVF_145050 [Spinacia oleracea]}	{sp|Q6NKW9|E138_ARATH; Glucan endo-1,3-Beta-glucosidase 8 OS=Arabidopsis thaliana GN=At1g64760 PE=1 SV=2}	{bvg:104888732; - - - - -}	{NA}	{GO:0004553; hydrolase activity, hydrolyzing O-glycosyl compounds; molecular_function GO:0005975; carbohydrate metabolic process; biological_process}	{XM_010673772.2; PREDICTED: Beta vulgaris subsp. vulgaris glucan endo-1,3-Beta-glucosidase 8 (LOC104888732), mRNA}	{PF00332:Glycosyl hydrolases family 17}
transcript_HQ_BAB_transcript5114/f2p0/3276	-0.42866	0.0087958	0.01742	{KNA10356.1; hypothetical protein SOVF_145050 [Spinacia oleracea]}	{sp|Q6NKW9|E138_ARATH; Glucan endo-1,3-Beta-glucosidase 8 OS=Arabidopsis thaliana GN=At1g64760 PE=1 SV=2}	{bvg:104888732; - - - - -}	{NA}	{GO:0005975; carbohydrate metabolic process; biological_process GO:0004553; hydrolase activity, hydrolyzing O-glycosyl compounds; molecular_function}	{XM_010673772.2; PREDICTED: Beta vulgaris subsp. vulgaris glucan endo-1,3-Beta-glucosidase 8 (LOC104888732), mRNA}	{PF00332:Glycosyl hydrolases family 17}
transcript_HQ_BAB_transcript4777/f2p0/3321	-0.72344	1.1776e-43	1.4644e-42	{KNA10356.1; hypothetical protein SOVF_145050 [Spinacia oleracea]}	{sp|Q6NKW9|E138_ARATH; Glucan endo-1,3-Beta-glucosidase 8 OS=Arabidopsis thaliana GN=At1g64760 PE=1 SV=2}	{bvg:104888732; - - - - -}	{NA}	{GO:0004553; hydrolase activity, hydrolyzing O-glycosyl compounds; molecular_function GO:0005975; carbohydrate metabolic process; biological_process}	{XM_010673772.2; PREDICTED: Beta vulgaris subsp. vulgaris glucan endo-1,3-Beta-glucosidase 8 (LOC104888732), mRNA}	{PF00332:Glycosyl hydrolases family 17}
transcript_HQ_BAB_transcript20137/f7p0/1187	0.3068	0.010071	0.019706	{KNA21673.1; hypothetical protein SOVF_041080 [Spinacia oleracea]}	{sp|O49499|CAMT4_ARATH; Caffeoyl-CoA O-methyltransferase 1 OS=Arabidopsis thaliana GN=CCOAOMT1 PE=1 SV=1}	{thj:104804378; K00588 E2.1.1.104 caffeoyl-CoA O-methyltransferase 2.1.1.104 ko00360; Metabolism; Amino acid metabolism; Phenylalanine metabolism | ko00940; Metabolism; Biosynthesis of other secondary metabolites; Phenylpropanoid biosynthesis | ko00945; Metabolism; Biosynthesis of other secondary metabolites; Stilbenoid, diarylheptanoid and gingerol biosynthesis | ko00941; Metabolism; Biosynthesi…	{At4g34050; KOG1663 O-methyltransferase Q Secondary metabolites biosynthesis, transport and catabolism ;}	{GO:0008171; O-methyltransferase activity; molecular_function}	{XM_010692314.2; PREDICTED: Beta vulgaris subsp. vulgaris caffeoyl-CoA O-methyltransferase (LOC104904122), mRNA}	{PF01596:O-methyltransferase}
transcript_HQ_BAB_transcript19574/f2p0/1406	1.136	1.9466e-07	6.6163e-07	{XP_010683005.1; PREDICTED: caffeic acid 3-O-methyltransferase isoform X2 [Beta vulgaris subsp. vulgaris]}	{sp|Q8W013|COMT1_CATRO; Caffeic acid 3-O-methyltransferase OS=Catharanthus roseus GN=COMT1 PE=2 SV=1}	{bvg:104902057; K13066 E2.1.1.68, COMT caffeic acid 3-O-methyltransferase 2.1.1.68 ko00940; Metabolism; Biosynthesis of other secondary metabolites; Phenylpropanoid biosynthesis}	{At5g54160; KOG3178 Hydroxyindole-O-methyltransferase and related SAM-dependent methyltransferases R General function prediction only ;}	{GO:0003700; sequence-specific DNA binding transcription factor activity; molecular_function GO:0008171; O-methyltransferase activity; molecular_function GO:0006480; N-terminal protein amino acid methylation; biological_process GO:0008152; NA GO:0046983; protein dimerization activity; molecular_function GO:0008168; methyltransferase activity; molecular_function GO:0006355; regulation of transcrip…	{XM_010036609.2; PREDICTED: Eucalyptus grandis caffeic acid 3-O-methyltransferase 1 (LOC104424243), mRNA}	{PF01047:MarR family PF00891:O-methyltransferase PF05891:AdoMet dependent proline di-methyltransferase PF08100:Dimerisation domain PF08241:Methyltransferase domain}
transcript_HQ_BAB_transcript19521/f3p0/1460	-0.972	1.327e-14	6.9779e-14	{XP_010683979.1; PREDICTED: caffeic acid 3-O-methyltransferase [Beta vulgaris subsp. vulgaris]}	{sp|A8J6X1|BMT_GLELI; Bergaptol O-methyltransferase OS=Glehnia littoralis GN=BMT PE=1 SV=1}	{egr:104438876; - - - - -}	{At3g53140; KOG3178 Hydroxyindole-O-methyltransferase and related SAM-dependent methyltransferases R General function prediction only ;}	{GO:0008171; O-methyltransferase activity; molecular_function GO:0008168; methyltransferase activity; molecular_function GO:0046983; protein dimerization activity; molecular_function}	{XM_010685677.2; PREDICTED: Beta vulgaris subsp. vulgaris caffeic acid 3-O-methyltransferase (LOC104898582), mRNA}	{PF08100:Dimerisation domain PF06859:Bicoid-interacting protein 3 (Bin3) PF00891:O-methyltransferase}
transcript_HQ_BAB_transcript19382/f2p0/1445	-1.2673	3.7128e-134	1.4185e-132	{KNA07730.1; hypothetical protein SOVF_168400 [Spinacia oleracea]}	{sp|P30359|CADH1_TOBAC; Probable cinnamyl alcohol dehydrogenase 1 OS=Nicotiana tabacum GN=CAD14 PE=1 SV=1}	{jcu:105637089; K00083 E1.1.1.195 cinnamyl-alcohol dehydrogenase 1.1.1.195 ko00940; Metabolism; Biosynthesis of other secondary metabolites; Phenylpropanoid biosynthesis}	{At4g34230; KOG0023 Alcohol dehydrogenase, class V Q Secondary metabolites biosynthesis, transport and catabolism ;}	{GO:0051287; NAD binding; molecular_function GO:0004616; phosphogluconate dehydrogenase (decarboxylating) activity; molecular_function GO:0055114; oxidation-reduction process; biological_process}	{XM_010693369.2; PREDICTED: Beta vulgaris subsp. vulgaris probable cinnamyl alcohol dehydrogenase 1 (LOC104904943), mRNA}	{PF00107:Zinc-binding dehydrogenase PF02826:D-isomer specific 2-hydroxyacid dehydrogenase, NAD binding domain PF03446:NAD binding domain of 6-phosphogluconate dehydrogenase PF08240:Alcohol dehydrogenase GroES-like domain}
transcript_HQ_BAB_transcript19333/f2p0/1435	-0.59939	0.00019624	0.00049213	{XP_010673676.1; PREDICTED: cinnamoyl-CoA reductase 1 isoform X2 [Beta vulgaris subsp. vulgaris]}	{sp|Q9S9N9|CCR1_ARATH; Cinnamoyl-CoA reductase 1 OS=Arabidopsis thaliana GN=CCR1 PE=1 SV=1}	{bvg:104890017; - - - - -}	{At5g19440; KOG1502 Flavonol reductase/cinnamoyl-CoA reductase V Defense mechanisms ;}	{GO:0050662; coenzyme binding; molecular_function GO:0006694; steroid biosynthetic process; biological_process GO:0003854; 3-beta-hydroxy-delta5-steroid dehydrogenase activity; molecular_function GO:0016616; oxidoreductase activity, acting on the CH-OH group of donors, NAD or NADP as acceptor; molecular_function GO:0019073; viral DNA genome packaging; biological_process GO:0055114; oxidation-redu…	{XM_010675374.2; PREDICTED: Beta vulgaris subsp. vulgaris cinnamoyl-CoA reductase 1 (LOC104890017), transcript variant X2, mRNA}	{PF03581:Herpesvirus UL33-like protein PF01073:3-beta hydroxysteroid dehydrogenase/isomerase family PF01370:NAD dependent epimerase/dehydratase family}
transcript_HQ_BAB_transcript18969/f2p0/1527	-0.36737	1.3129e-05	3.7787e-05	{XP_010681610.1; PREDICTED: caffeoylshikimate esterase isoform X1 [Beta vulgaris subsp. vulgaris]}	{sp|Q9C942|CSE_ARATH; Caffeoylshikimate esterase OS=Arabidopsis thaliana GN=CSE PE=1 SV=1}	{nnu:104602105; K01054 MGLL acylglycerol lipase 3.1.1.23 ko00561; Metabolism; Lipid metabolism; Glycerolipid metabolism | ko04923; Organismal Systems; Endocrine system; Regulation of lipolysis in adipocytes | ko04723; Organismal Systems; Nervous system; Retrograde endocannabinoid signaling}	{At1g77420; KOG1455 Lysophospholipase I Lipid transport and metabolism ;}	{GO:0009058; biosynthetic process; biological_process GO:0016787; hydrolase activity; molecular_function GO:0016788; hydrolase activity, acting on ester bonds; molecular_function GO:0008236; serine-type peptidase activity; molecular_function GO:0006508; proteolysis; biological_process}	{XM_010683308.2; PREDICTED: Beta vulgaris subsp. vulgaris caffeoylshikimate esterase (LOC104896551), transcript variant X1, mRNA}	{PF00975:Thioesterase domain PF02129:X-Pro dipeptidyl-peptidase (S15 family) PF00326:Prolyl oligopeptidase family PF01738:Dienelactone hydrolase family PF02230:Phospholipase/Carboxylesterase}
transcript_HQ_BAB_transcript18904/f8p0/1521	1.0329	3.9406e-91	1.0166e-89	{XP_010683005.1; PREDICTED: caffeic acid 3-O-methyltransferase isoform X2 [Beta vulgaris subsp. vulgaris]}	{sp|Q8W013|COMT1_CATRO; Caffeic acid 3-O-methyltransferase OS=Catharanthus roseus GN=COMT1 PE=2 SV=1}	{bvg:104902234; K13066 E2.1.1.68, COMT caffeic acid 3-O-methyltransferase 2.1.1.68 ko00940; Metabolism; Biosynthesis of other secondary metabolites; Phenylpropanoid biosynthesis}	{At5g54160; KOG3178 Hydroxyindole-O-methyltransferase and related SAM-dependent methyltransferases R General function prediction only ;}	{GO:0008168; methyltransferase activity; molecular_function GO:0006355; regulation of transcription, DNA-dependent; biological_process GO:0008152; NA GO:0046983; protein dimerization activity; molecular_function GO:0008171; O-methyltransferase activity; molecular_function GO:0003700; sequence-specific DNA binding transcription factor activity; molecular_function GO:0006480; N-terminal protein ami…	{XM_010036609.2; PREDICTED: Eucalyptus grandis caffeic acid 3-O-methyltransferase 1 (LOC104424243), mRNA}	{PF05891:AdoMet dependent proline di-methyltransferase PF00891:O-methyltransferase PF01047:MarR family PF08241:Methyltransferase domain PF08100:Dimerisation domain}
transcript_HQ_BAB_transcript18880/f2p0/1533	2.8305	4.7451e-26	3.8018e-25	{XP_010687750.1; PREDICTED: caffeic acid 3-O-methyltransferase [Beta vulgaris subsp. vulgaris]}	{sp|Q9XGW0|COMT1_OCIBA; Caffeic acid 3-O-methyltransferase 1 OS=Ocimum basilicum GN=COMT1 PE=2 SV=1}	{bvg:104901795; K13066 E2.1.1.68, COMT caffeic acid 3-O-methyltransferase 2.1.1.68 ko00940; Metabolism; Biosynthesis of other secondary metabolites; Phenylpropanoid biosynthesis}	{At5g54160; KOG3178 Hydroxyindole-O-methyltransferase and related SAM-dependent methyltransferases R General function prediction only ;}	{GO:0046983; protein dimerization activity; molecular_function GO:0008168; methyltransferase activity; molecular_function GO:0006480; N-terminal protein amino acid methylation; biological_process GO:0008171; O-methyltransferase activity; molecular_function}	{XM_010689448.2; PREDICTED: Beta vulgaris subsp. vulgaris caffeic acid 3-O-methyltransferase (LOC104901795), mRNA}	{PF05891:AdoMet dependent proline di-methyltransferase PF00891:O-methyltransferase PF08100:Dimerisation domain}
transcript_HQ_BAB_transcript18291/f2p0/1635	0.81335	2.3025e-21	1.5903e-20	{XP_010683005.1; PREDICTED: caffeic acid 3-O-methyltransferase isoform X2 [Beta vulgaris subsp. vulgaris]}	{sp|Q8W013|COMT1_CATRO; Caffeic acid 3-O-methyltransferase OS=Catharanthus roseus GN=COMT1 PE=2 SV=1}	{bvg:104902234; K13066 E2.1.1.68, COMT caffeic acid 3-O-methyltransferase 2.1.1.68 ko00940; Metabolism; Biosynthesis of other secondary metabolites; Phenylpropanoid biosynthesis}	{At5g54160; KOG3178 Hydroxyindole-O-methyltransferase and related SAM-dependent methyltransferases R General function prediction only ;}	{GO:0008152; NA GO:0046983; protein dimerization activity; molecular_function GO:0008168; methyltransferase activity; molecular_function GO:0008171; O-methyltransferase activity; molecular_function GO:0006480; N-terminal protein amino acid methylation; biological_process}	{XM_010689183.2; PREDICTED: Beta vulgaris subsp. vulgaris caffeic acid 3-O-methyltransferase (LOC104901566), mRNA}	{PF00891:O-methyltransferase PF05891:AdoMet dependent proline di-methyltransferase PF08100:Dimerisation domain PF08241:Methyltransferase domain PF06859:Bicoid-interacting protein 3 (Bin3)}
transcript_HQ_BAB_transcript17874/f4p0/1665	-1.2193	1.6822e-77	3.6305e-76	{KNA07730.1; hypothetical protein SOVF_168400 [Spinacia oleracea]}	{sp|P30359|CADH1_TOBAC; Probable cinnamyl alcohol dehydrogenase 1 OS=Nicotiana tabacum GN=CAD14 PE=1 SV=1}	{jcu:105637089; K00083 E1.1.1.195 cinnamyl-alcohol dehydrogenase 1.1.1.195 ko00940; Metabolism; Biosynthesis of other secondary metabolites; Phenylpropanoid biosynthesis}	{At4g34230; KOG0023 Alcohol dehydrogenase, class V Q Secondary metabolites biosynthesis, transport and catabolism ;}	{GO:0055114; oxidation-reduction process; biological_process GO:0051287; NAD binding; molecular_function GO:0004616; phosphogluconate dehydrogenase (decarboxylating) activity; molecular_function}	{XM_010693369.2; PREDICTED: Beta vulgaris subsp. vulgaris probable cinnamyl alcohol dehydrogenase 1 (LOC104904943), mRNA}	{PF00107:Zinc-binding dehydrogenase PF02826:D-isomer specific 2-hydroxyacid dehydrogenase, NAD binding domain PF08240:Alcohol dehydrogenase GroES-like domain PF03446:NAD binding domain of 6-phosphogluconate dehydrogenase}
transcript_HQ_BAB_transcript17598/f6p0/1700	0.27227	3.6823e-05	0.00010092	{KNA05086.1; hypothetical protein SOVF_193680 [Spinacia oleracea]}	{sp|P52409|E13B_WHEAT; Glucan endo-1,3-Beta-glucosidase OS=Triticum aestivum GN=GLC1 PE=2 SV=1}	{rcu:8278071; - - - - -}	{NA}	{GO:0004553; hydrolase activity, hydrolyzing O-glycosyl compounds; molecular_function GO:0005975; carbohydrate metabolic process; biological_process}	{XM_010687459.2; PREDICTED: Beta vulgaris subsp. vulgaris glucan endo-1,3-Beta-glucosidase (LOC104900112), mRNA}	{PF00332:Glycosyl hydrolases family 17}
transcript_HQ_BAB_transcript17338/f4p0/1810	-0.64183	1.7262e-25	1.3568e-24	{XP_010690550.1; PREDICTED: glucan endo-1,3-Beta-glucosidase [Beta vulgaris subsp. vulgaris]}	{sp|P52409|E13B_WHEAT; Glucan endo-1,3-Beta-glucosidase OS=Triticum aestivum GN=GLC1 PE=2 SV=1}	{bvg:104904063; - - - - -}	{NA}	{GO:0004553; hydrolase activity, hydrolyzing O-glycosyl compounds; molecular_function GO:0005975; carbohydrate metabolic process; biological_process}	{XM_010692248.2; PREDICTED: Beta vulgaris subsp. vulgaris glucan endo-1,3-Beta-glucosidase (LOC104904063), mRNA}	{PF00332:Glycosyl hydrolases family 17}
transcript_HQ_BAB_transcript16892/f2p0/1811	1.0467	1.5079e-12	7.1497e-12	{KNA25153.1; hypothetical protein SOVF_008790 [Spinacia oleracea]}	{sp|B8AVF0|BGL12_ORYSI; Beta-glucosidase 12 OS=Oryza sativa subsp. indica GN=BGLU12 PE=3 SV=1}	{bvg:104889926; K01188 E3.2.1.21 Beta-glucosidase 3.2.1.21 ko00500; Metabolism; Carbohydrate metabolism; Starch and sucrose metabolism | ko00460; Metabolism; Metabolism of other amino acids; Cyanoamino acid metabolism | ko00940; Metabolism; Biosynthesis of other secondary metabolites; Phenylpropanoid biosynthesis}	{At5g42260; KOG0626 Beta-glucosidase, lactase phlorizinhydrolase, and related proteins G Carbohydrate transport and metabolism ;}	{GO:0005975; carbohydrate metabolic process; biological_process GO:0004553; hydrolase activity, hydrolyzing O-glycosyl compounds; molecular_function}	{XM_010675265.2; PREDICTED: Beta vulgaris subsp. vulgaris Beta-glucosidase 13 (LOC104889926), transcript variant X1, mRNA}	{PF00232:Glycosyl hydrolase family 1}
transcript_HQ_BAB_transcript15621/f2p0/1933	0.96001	1.3996e-17	8.3817e-17	{KNA14431.1; hypothetical protein SOVF_106700 [Spinacia oleracea]}	{sp|Q9C942|CSE_ARATH; Caffeoylshikimate esterase OS=Arabidopsis thaliana GN=CSE PE=1 SV=1}	{bvg:104885641; K01054 MGLL acylglycerol lipase 3.1.1.23 ko00561; Metabolism; Lipid metabolism; Glycerolipid metabolism | ko04923; Organismal Systems; Endocrine system; Regulation of lipolysis in adipocytes | ko04723; Organismal Systems; Nervous system; Retrograde endocannabinoid signaling}	{At5g11650; KOG1455 Lysophospholipase I Lipid transport and metabolism ;}	{GO:0016788; hydrolase activity, acting on ester bonds; molecular_function GO:0016787; hydrolase activity; molecular_function GO:0009058; biosynthetic process; biological_process}	{XR_002038812.1; PREDICTED: Beta vulgaris subsp. vulgaris monoacylglycerol lipase (LOC104885641), transcript variant X2, misc_RNA}	{PF06821:Serine hydrolase PF00975:Thioesterase domain}
transcript_HQ_BAB_transcript15357/f4p0/1967	0.72447	2.3241e-20	1.5446e-19	{KNA05578.1; hypothetical protein SOVF_189070 [Spinacia oleracea]}	{sp|Q9M069|E137_ARATH; Glucan endo-1,3-Beta-glucosidase 7 OS=Arabidopsis thaliana GN=At4g34480 PE=1 SV=2}	{cit:102614404; - - - - -}	{NA}	{GO:0004553; hydrolase activity, hydrolyzing O-glycosyl compounds; molecular_function GO:0005975; carbohydrate metabolic process; biological_process}	{XM_009397605.2; PREDICTED: Musa acuminata subsp. malaccensis glucan endo-1,3-Beta-glucosidase 6-like (LOC103981031), mRNA}	{PF00332:Glycosyl hydrolases family 17}
transcript_HQ_BAB_transcript14805/f9p0/2012	-1.3513	4.52e-19	2.867e-18	{XP_010677904.1; PREDICTED: Beta-glucosidase 13 [Beta vulgaris subsp. vulgaris]}	{sp|Q7XKV4|BGL12_ORYSJ; Beta-glucosidase 12 OS=Oryza sativa subsp. japonica GN=BGLU12 PE=1 SV=2}	{bvg:104893499; K01188 E3.2.1.21 Beta-glucosidase 3.2.1.21 ko00500; Metabolism; Carbohydrate metabolism; Starch and sucrose metabolism | ko00460; Metabolism; Metabolism of other amino acids; Cyanoamino acid metabolism | ko00940; Metabolism; Biosynthesis of other secondary metabolites; Phenylpropanoid biosynthesis}	{At2g44450; KOG0626 Beta-glucosidase, lactase phlorizinhydrolase, and related proteins G Carbohydrate transport and metabolism ;}	{GO:0005975; carbohydrate metabolic process; biological_process GO:0004553; hydrolase activity, hydrolyzing O-glycosyl compounds; molecular_function}	{XM_010679602.2; PREDICTED: Beta vulgaris subsp. vulgaris Beta-glucosidase 13 (LOC104893499), mRNA}	{PF00150:Cellulase (glycosyl hydrolase family 5) PF00232:Glycosyl hydrolase family 1}
transcript_HQ_BAB_transcript14801/f16p0/2018	1.2773	2.7477e-131	1.0257e-129	{XP_010676930.1; PREDICTED: glucan endo-1,3-Beta-glucosidase 11 [Beta vulgaris subsp. vulgaris]}	{sp|Q8L868|E1311_ARATH; Glucan endo-1,3-Beta-glucosidase 11 OS=Arabidopsis thaliana GN=At1g32860 PE=1 SV=1}	{bvg:104892644; - - - - -}	{NA}	{GO:0004553; hydrolase activity, hydrolyzing O-glycosyl compounds; molecular_function GO:0005975; carbohydrate metabolic process; biological_process}	{XM_010678628.2; PREDICTED: Beta vulgaris subsp. vulgaris glucan endo-1,3-Beta-glucosidase 11 (LOC104892644), mRNA}	{PF00332:Glycosyl hydrolases family 17}
transcript_HQ_BAB_transcript14656/f2p0/2038	0.59712	0.0014662	0.0032868	{XP_010690891.1; PREDICTED: laccase-17 [Beta vulgaris subsp. vulgaris]}	{sp|Q9FJD5|LAC17_ARATH; Laccase-17 OS=Arabidopsis thaliana GN=LAC17 PE=2 SV=1}	{bvg:104904359; K05909 E1.10.3.2 laccase 1.10.3.2 -}	{At5g60020; KOG1263 Multicopper oxidases Q Secondary metabolites biosynthesis, transport and catabolism ;}	{GO:0005507; copper ion binding; molecular_function GO:0016491; oxidoreductase activity; molecular_function GO:0055114; oxidation-reduction process; biological_process}	{XM_010692589.2; PREDICTED: Beta vulgaris subsp. vulgaris laccase-17 (LOC104904359), mRNA}	{PF07731:Multicopper oxidase PF07732:Multicopper oxidase PF00394:Multicopper oxidase}
transcript_HQ_BAB_transcript14532/f2p0/2069	1.3098	0.00044427	0.001065	{KNA05578.1; hypothetical protein SOVF_189070 [Spinacia oleracea]}	{sp|Q9FJU9|E1313_ARATH; Glucan endo-1,3-Beta-glucosidase 13 OS=Arabidopsis thaliana GN=At5g56590 PE=1 SV=1}	{cit:102614404; - - - - -}	{NA}	{GO:0005975; carbohydrate metabolic process; biological_process GO:0004553; hydrolase activity, hydrolyzing O-glycosyl compounds; molecular_function}	{XM_009397605.2; PREDICTED: Musa acuminata subsp. malaccensis glucan endo-1,3-Beta-glucosidase 6-like (LOC103981031), mRNA}	{PF00332:Glycosyl hydrolases family 17}
transcript_HQ_BAB_transcript13691/f2p0/2161	1.5193	5.2486e-36	5.5061e-35	{XP_010685615.1; PREDICTED: laccase-4 [Beta vulgaris subsp. vulgaris]}	{sp|O80434|LAC4_ARATH; Laccase-4 OS=Arabidopsis thaliana GN=IRX12 PE=2 SV=2}	{bvg:104892204; K05909 E1.10.3.2 laccase 1.10.3.2 -}	{At2g38080; KOG1263 Multicopper oxidases Q Secondary metabolites biosynthesis, transport and catabolism ;}	{GO:0005507; copper ion binding; molecular_function GO:0016491; oxidoreductase activity; molecular_function GO:0055114; oxidation-reduction process; biological_process}	{XM_010678055.2; PREDICTED: Beta vulgaris subsp. vulgaris laccase-4-like (LOC104892204), mRNA}	{PF07732:Multicopper oxidase PF07731:Multicopper oxidase PF00394:Multicopper oxidase}
transcript_HQ_BAB_transcript13036/f2p0/2213	2.4564	1.9354e-33	1.9002e-32	{XP_010685719.1; PREDICTED: laccase-17 [Beta vulgaris subsp. vulgaris]}	{sp|Q9FJD5|LAC17_ARATH; Laccase-17 OS=Arabidopsis thaliana GN=LAC17 PE=2 SV=1}	{nnu:104597151; K05909 E1.10.3.2 laccase 1.10.3.2 -}	{At5g60020; KOG1263 Multicopper oxidases Q Secondary metabolites biosynthesis, transport and catabolism ;}	{GO:0005507; copper ion binding; molecular_function GO:0016491; oxidoreductase activity; molecular_function GO:0055114; oxidation-reduction process; biological_process}	{XM_010687417.2; PREDICTED: Beta vulgaris subsp. vulgaris laccase-17 (LOC104900080), mRNA}	{PF07732:Multicopper oxidase PF07731:Multicopper oxidase PF00394:Multicopper oxidase}
transcript_HQ_BAB_transcript12582/f3p0/2269	1.1573	6.8e-17	3.9557e-16	{XP_010677916.1; PREDICTED: 4-coumarate--CoA ligase-like 9 [Beta vulgaris subsp. vulgaris]}	{sp|Q84P23|4CLL9_ARATH; 4-coumarate--CoA ligase-like 9 OS=Arabidopsis thaliana GN=4CLL9 PE=1 SV=2}	{bvg:104893505; - - - - -}	{At5g63380; KOG1176 Acyl-CoA synthetase I Lipid transport and metabolism ;}	{GO:0003824; NA GO:0008152; NA}	{XM_010679614.2; PREDICTED: Beta vulgaris subsp. vulgaris 4-coumarate--CoA ligase-like 9 (LOC104893505), mRNA}	{PF00501:AMP-binding enzyme}
transcript_HQ_BAB_transcript12377/f9p0/2281	0.92344	2.3446e-22	1.6707e-21	{XP_010690098.1; PREDICTED: laccase-4 [Beta vulgaris subsp. vulgaris]}	{sp|Q0IQU1|LAC22_ORYSJ; Laccase-22 OS=Oryza sativa subsp. japonica GN=LAC22 PE=2 SV=2}	{bvg:104903698; K05909 E1.10.3.2 laccase 1.10.3.2 -}	{At2g38080; KOG1263 Multicopper oxidases Q Secondary metabolites biosynthesis, transport and catabolism ;}	{GO:0055114; oxidation-reduction process; biological_process GO:0016491; oxidoreductase activity; molecular_function GO:0005507; copper ion binding; molecular_function}	{XM_010691796.2; PREDICTED: Beta vulgaris subsp. vulgaris laccase-4 (LOC104903698), mRNA}	{PF00394:Multicopper oxidase PF07731:Multicopper oxidase PF07732:Multicopper oxidase}
transcript_HQ_BAB_transcript11259/f2p0/2420	-1.1045	2.9681e-09	1.1487e-08	{XP_010677916.1; PREDICTED: 4-coumarate--CoA ligase-like 9 [Beta vulgaris subsp. vulgaris]}	{sp|Q84P23|4CLL9_ARATH; 4-coumarate--CoA ligase-like 9 OS=Arabidopsis thaliana GN=4CLL9 PE=1 SV=2}	{bvg:104893505; - - - - -}	{At5g63380; KOG1176 Acyl-CoA synthetase I Lipid transport and metabolism ;}	{GO:0003824; NA GO:0008152; NA}	{XM_010679614.2; PREDICTED: Beta vulgaris subsp. vulgaris 4-coumarate--CoA ligase-like 9 (LOC104893505), mRNA}	{PF00501:AMP-binding enzyme}

## Sheet: LB vs. HB
Table S7 DEGs related to lignin biosynthetic process in Haloxylon persicum
Gene_id	LB_readcount	HB_readcount	log2FoldChange	pval	padj	{nr}	{SwissProt}	{KEGG}	{KOG}	{GO}	{nt}	{pfam}
transcript_HQ_SAB_transcript12864/f2p0/2052	6.43024	93.6063	-3.8637	9.7471e-11	2.5485e-10	{AFK43896.1; unknown [Medicago truncatula]}	{sp|P45734|PALY_TRISU; Phenylalanine ammonia-lyase OS=Trifolium subterraneum GN=PAL1 PE=3 SV=1}	{nnu:104595050; K10775 PAL phenylalanine ammonia-lyase 4.3.1.24 ko00360; Metabolism; Amino acid metabolism; Phenylalanine metabolism | ko00940; Metabolism; Biosynthesis of other secondary metabolites; Phenylpropanoid biosynthesis}	{At3g10340; KOG0222 Phenylalanine and histidine ammonia-lyase Q Secondary metabolites biosynthesis, transport and catabolism ;}	{NA}	{KM504384.1; Osmanthus fragrans phenylalanine ammonia lyase (PAL) mRNA, partial cds}	{NA}
transcript_HQ_SAB_transcript7089/f182p0/2543	4402.68	6335.59	-0.5251	3.5608e-05	6.7518e-05	{XP_010684079.1; PREDICTED: phenylalanine ammonia-lyase [Beta vulgaris subsp. vulgaris]}	{sp|P45730|PALY_POPTR; Phenylalanine ammonia-lyase OS=Populus trichocarpa GN=PAL PE=2 SV=1}	{gmx:100787902; K10775 PAL phenylalanine ammonia-lyase 4.3.1.24 ko00360; Metabolism; Amino acid metabolism; Phenylalanine metabolism | ko00940; Metabolism; Biosynthesis of other secondary metabolites; Phenylpropanoid biosynthesis}	{At2g37040; KOG0222 Phenylalanine and histidine ammonia-lyase Q Secondary metabolites biosynthesis, transport and catabolism ;}	{NA}	{XM_010685777.2; PREDICTED: Beta vulgaris subsp. vulgaris phenylalanine ammonia-lyase (LOC104898673), mRNA}	{NA}
transcript_HQ_SAB_transcript9757/f2p0/2354	241.305	712.439	-1.5619	7.4362e-20	2.7386e-19	{XP_010677916.1; PREDICTED: 4-coumarate--CoA ligase-like 9 [Beta vulgaris subsp. vulgaris]}	{sp|Q84P23|4CLL9_ARATH; 4-coumarate--CoA ligase-like 9 OS=Arabidopsis thaliana GN=4CLL9 PE=1 SV=2}	{bvg:104893505; - - - - -}	{At5g63380; KOG1176 Acyl-CoA synthetase I Lipid transport and metabolism ;}	{GO:0003824; NA GO:0008152; NA}	{XM_010679614.2; PREDICTED: Beta vulgaris subsp. vulgaris 4-coumarate--CoA ligase-like 9 (LOC104893505), mRNA}	{PF00501:AMP-binding enzyme}
transcript_HQ_SAB_transcript9656/f2p0/2349	41.7049	151.701	-1.8629	4.3905e-07	9.4726e-07	{XP_010688353.1; PREDICTED: glucan endo-1,3-Beta-glucosidase 13 [Beta vulgaris subsp. vulgaris]}	{sp|Q9FJU9|E1313_ARATH; Glucan endo-1,3-Beta-glucosidase 13 OS=Arabidopsis thaliana GN=At5g56590 PE=1 SV=1}	{cit:102627838; - - - - -}	{NA}	{GO:0004553; hydrolase activity, hydrolyzing O-glycosyl compounds; molecular_function GO:0005975; carbohydrate metabolic process; biological_process}	{XM_010690051.2; PREDICTED: Beta vulgaris subsp. vulgaris glucan endo-1,3-Beta-glucosidase 13 (LOC104902320), mRNA}	{PF00332:Glycosyl hydrolases family 17}
transcript_HQ_SAB_transcript8674/f10p0/2409	530.205	1032.47	-0.96148	6.7212e-11	1.7701e-10	{XP_010671808.1; PREDICTED: Beta-glucosidase-like SFR2, chloroplastic [Beta vulgaris subsp. vulgaris]}	{sp|Q8L6H7|SFR2_ORYSJ; Beta-glucosidase-like SFR2, chloroplastic OS=Oryza sativa subsp. japonica GN=SFR2 PE=2 SV=1}	{bvg:104888504; K21362 - - 2.4.1.184 -}	{At3g06510; KOG0626 Beta-glucosidase, lactase phlorizinhydrolase, and related proteins G Carbohydrate transport and metabolism ;}	{GO:0005975; carbohydrate metabolic process; biological_process GO:0004553; hydrolase activity, hydrolyzing O-glycosyl compounds; molecular_function}	{XM_010673506.1; PREDICTED: Beta vulgaris subsp. vulgaris Beta-glucosidase-like SFR2, chloroplastic (LOC104888504), mRNA}	{PF00232:Glycosyl hydrolase family 1 PF00150:Cellulase (glycosyl hydrolase family 5)}
transcript_HQ_SAB_transcript8586/f2p0/2449	124.595	263.194	-1.0789	1.8827e-05	3.6417e-05	{XP_010694376.1; PREDICTED: uncharacterized protein LOC104907184 [Beta vulgaris subsp. vulgaris]}	{sp|A7LXU3|BGH3B_BACO1; Beta-glucosidase BoGH3B OS=Bacteroides ovatus (strain ATCC 8483 / DSM 1896 / JCM 5824 / NCTC 11153) GN=BACOVA_02659 PE=1 SV=1}	{lang:109338466; K05349 bglX Beta-glucosidase 3.2.1.21 ko00500; Metabolism; Carbohydrate metabolism; Starch and sucrose metabolism | ko00460; Metabolism; Metabolism of other amino acids; Cyanoamino acid metabolism | ko00940; Metabolism; Biosynthesis of other secondary metabolites; Phenylpropanoid biosynthesis; lang:109338466; - - - - -}	{NA}	{GO:0005975; carbohydrate metabolic process; biological_process GO:0004553; hydrolase activity, hydrolyzing O-glycosyl compounds; molecular_function}	{XM_010696075.2; PREDICTED: Beta vulgaris subsp. vulgaris Beta-glucosidase BoGH3B (LOC104907184), transcript variant X2, mRNA}	{PF01915:Glycosyl hydrolase family 3 C-terminal domain PF00933:Glycosyl hydrolase family 3 N terminal domain}
transcript_HQ_SAB_transcript33348/f2p0/389	184.951	3.73739	5.629	4.9829e-31	2.5256e-30	{XP_010690550.1; PREDICTED: glucan endo-1,3-Beta-glucosidase [Beta vulgaris subsp. vulgaris]}	{NA}	{bvg:104904063; - - - - -}	{NA}	{NA}	{NA}	{NA}
transcript_HQ_SAB_transcript32125/f2p0/620	742.743	180.487	2.041	9.3495e-19	3.3191e-18	{XP_010690550.1; PREDICTED: glucan endo-1,3-Beta-glucosidase [Beta vulgaris subsp. vulgaris]}	{sp|Q94G86|ALL9_OLEEU; Glucan endo-1,3-beta-D-glucosidase OS=Olea europaea GN=OLE9 PE=1 SV=1}	{bvg:104904063; - - - - -}	{NA}	{NA}	{NA}	{NA}
transcript_HQ_SAB_transcript29438/f2p0/929	354.799	588.159	-0.72921	1.149e-05	2.2586e-05	{KNA21673.1; hypothetical protein SOVF_041080 [Spinacia oleracea]}	{sp|O49499|CAMT4_ARATH; Caffeoyl-CoA O-methyltransferase 1 OS=Arabidopsis thaliana GN=CCOAOMT1 PE=1 SV=1}	{thj:104804378; K00588 E2.1.1.104 caffeoyl-CoA O-methyltransferase 2.1.1.104 ko00360; Metabolism; Amino acid metabolism; Phenylalanine metabolism | ko00940; Metabolism; Biosynthesis of other secondary metabolites; Phenylpropanoid biosynthesis | ko00945; Metabolism; Biosynthesis of other secondary metabolites; Stilbenoid, diarylheptanoid and gingerol biosynthesis | ko00941; Metabolism; Biosynthesi…	{At4g34050; KOG1663 O-methyltransferase Q Secondary metabolites biosynthesis, transport and catabolism ;}	{GO:0008171; O-methyltransferase activity; molecular_function}	{XM_010692314.2; PREDICTED: Beta vulgaris subsp. vulgaris caffeoyl-CoA O-methyltransferase (LOC104904122), mRNA}	{PF01596:O-methyltransferase}
transcript_HQ_SAB_transcript28514/f7p0/1008	895.607	1376.12	-0.61967	1.1531e-05	2.266e-05	{XP_015063664.1; PREDICTED: caffeoyl-CoA O-methyltransferase [Solanum pennellii]}	{sp|Q8H9B6|CAMT_SOLTU; Caffeoyl-CoA O-methyltransferase OS=Solanum tuberosum GN=CCOAOMT PE=2 SV=1}	{spen:107008953; K00588 E2.1.1.104 caffeoyl-CoA O-methyltransferase 2.1.1.104 ko00360; Metabolism; Amino acid metabolism; Phenylalanine metabolism | ko00940; Metabolism; Biosynthesis of other secondary metabolites; Phenylpropanoid biosynthesis | ko00945; Metabolism; Biosynthesis of other secondary metabolites; Stilbenoid, diarylheptanoid and gingerol biosynthesis | ko00941; Metabolism; Biosynthes…	{At4g34050; KOG1663 O-methyltransferase Q Secondary metabolites biosynthesis, transport and catabolism ;}	{GO:0008171; O-methyltransferase activity; molecular_function}	{JQ684014.1; Paeonia lactiflora cultivar Hongyanzhenghui caffeoyl-CoA O-methyltransferase mRNA, complete cds}	{PF01596:O-methyltransferase}
transcript_HQ_SAB_transcript26570/f2p0/1175	1652.33	255.06	2.6956	6.3719e-61	5.773e-60	{KNA11912.1; hypothetical protein SOVF_130840 isoform A [Spinacia oleracea]}	{sp|Q500U8|TKPR1_ARATH; Tetraketide alpha-pyrone reductase 1 OS=Arabidopsis thaliana GN=TKPR1 PE=1 SV=1}	{bvg:104890014; - - - - -}	{At5g19440; KOG1502 Flavonol reductase/Cinnamoyl-CoA reductase V Defense mechanisms ;}	{GO:0003854; 3-beta-hydroxy-delta5-steroid dehydrogenase activity; molecular_function GO:0003824; NA GO:0016616; oxidoreductase activity, acting on the CH-OH group of donors, NAD or NADP as acceptor; molecular_function GO:0006694; steroid biosynthetic process; biological_process GO:0050662; coenzyme binding; molecular_function GO:0055114; oxidation-reduction process; biological_process}	{XM_010675370.2; PREDICTED: Beta vulgaris subsp. vulgaris dihydroflavonol 4-reductase (LOC104890014), mRNA}	{PF01073:3-beta hydroxysteroid dehydrogenase/isomerase family PF01370:NAD dependent epimerase/dehydratase family}
transcript_HQ_SAB_transcript26030/f2p0/1220	449.646	82.5362	2.4457	8.0771e-27	3.6614e-26	{XP_010693140.1; PREDICTED: caffeoylshikimate esterase [Beta vulgaris subsp. vulgaris]}	{sp|Q9C942|CSE_ARATH; Caffeoylshikimate esterase OS=Arabidopsis thaliana GN=CSE PE=1 SV=1}	{egu:105045749; K01054 MGLL acylglycerol lipase 3.1.1.23 ko00561; Metabolism; Lipid metabolism; Glycerolipid metabolism | ko04923; Organismal Systems; Endocrine system; Regulation of lipolysis in adipocytes | ko04723; Organismal Systems; Nervous system; Retrograde endocannabinoid signaling}	{At2g39420; KOG1455 Lysophospholipase I Lipid transport and metabolism ;}	{GO:0008236; serine-type peptidase activity; molecular_function GO:0016787; hydrolase activity; molecular_function GO:0006508; proteolysis; biological_process}	{LC164200.1; Spinacia oleracea mRNA, freshness evaluating candidate marker, clone: SO_F332}	{PF02129:X-Pro dipeptidyl-peptidase (S15 family) PF00326:Prolyl oligopeptidase family PF02230:Phospholipase/Carboxylesterase}
transcript_HQ_SAB_transcript25898/f2p0/1230	210.238	721.837	-1.7797	4.9944e-25	2.1543e-24	{XP_010673673.1; PREDICTED: Cinnamoyl-CoA reductase 1 [Beta vulgaris subsp. vulgaris]}	{sp|Q9S9N9|CCR1_ARATH; Cinnamoyl-CoA reductase 1 OS=Arabidopsis thaliana GN=CCR1 PE=1 SV=1}	{bvg:104890015; - - - - -}	{At5g19440; KOG1502 Flavonol reductase/Cinnamoyl-CoA reductase V Defense mechanisms ;}	{GO:0003854; 3-beta-hydroxy-delta5-steroid dehydrogenase activity; molecular_function GO:0003824; NA GO:0016616; oxidoreductase activity, acting on the CH-OH group of donors, NAD or NADP as acceptor; molecular_function GO:0006694; steroid biosynthetic process; biological_process GO:0050662; coenzyme binding; molecular_function GO:0055114; oxidation-reduction process; biological_process}	{XM_010675374.2; PREDICTED: Beta vulgaris subsp. vulgaris Cinnamoyl-CoA reductase 1 (LOC104890017), transcript variant X2, mRNA}	{PF01370:NAD dependent epimerase/dehydratase family PF01073:3-beta hydroxysteroid dehydrogenase/isomerase family}
transcript_HQ_SAB_transcript24946/f3p0/1296	155.523	318.129	-1.0325	6.3871e-06	1.2775e-05	{XP_010665804.1; PREDICTED: anthocyanidin reductase ((2S)-flavan-3-ol-forming) [Beta vulgaris subsp. vulgaris]}	{sp|D7U6G6|ANRPN_VITVI; Anthocyanidin reductase ((2S)-flavan-3-ol-forming) OS=Vitis vinifera GN=ANR PE=3 SV=1}	{pxb:103957850; K08695 ANR anthocyanidin reductase 1.3.1.77 ko00941; Metabolism; Biosynthesis of other secondary metabolites; Flavonoid biosynthesis}	{At1g61720; KOG1502 Flavonol reductase/Cinnamoyl-CoA reductase V Defense mechanisms ;}	{GO:0006694; steroid biosynthetic process; biological_process GO:0051287; NAD binding; molecular_function GO:0055114; oxidation-reduction process; biological_process GO:0016620; oxidoreductase activity, acting on the aldehyde or oxo group of donors, NAD or NADP as acceptor; molecular_function GO:0050662; coenzyme binding; molecular_function GO:0003854; 3-beta-hydroxy-delta5-steroid dehydrogenase …	{NA}	{PF01370:NAD dependent epimerase/dehydratase family PF01073:3-beta hydroxysteroid dehydrogenase/isomerase family PF01118:Semialdehyde dehydrogenase, NAD binding domain}
transcript_HQ_SAB_transcript24347/f13p0/1323	5439.54	717.403	2.9226	5.5062e-93	7.6685e-92	{XP_010673676.1; PREDICTED: Cinnamoyl-CoA reductase 1 isoform X2 [Beta vulgaris subsp. vulgaris]}	{sp|Q9S9N9|CCR1_ARATH; Cinnamoyl-CoA reductase 1 OS=Arabidopsis thaliana GN=CCR1 PE=1 SV=1}	{bvg:104890017; - - - - -}	{At5g19440; KOG1502 Flavonol reductase/Cinnamoyl-CoA reductase V Defense mechanisms ;}	{GO:0003824; NA GO:0019073; viral DNA genome packaging; biological_process GO:0016616; oxidoreductase activity, acting on the CH-OH group of donors, NAD or NADP as acceptor; molecular_function GO:0003854; 3-beta-hydroxy-delta5-steroid dehydrogenase activity; molecular_function GO:0050662; coenzyme binding; molecular_function GO:0055114; oxidation-reduction process; biological_process GO:0006694; …	{XM_010675374.2; PREDICTED: Beta vulgaris subsp. vulgaris Cinnamoyl-CoA reductase 1 (LOC104890017), transcript variant X2, mRNA}	{PF03581:Herpesvirus UL33-like protein PF01370:NAD dependent epimerase/dehydratase family PF01073:3-beta hydroxysteroid dehydrogenase/isomerase family}
transcript_HQ_SAB_transcript24324/f3p0/1357	91.301	373.374	-2.0319	2.1826e-17	7.4168e-17	{XP_010683005.1; PREDICTED: caffeic acid 3-O-methyltransferase isoform X2 [Beta vulgaris subsp. vulgaris]}	{sp|Q8W013|COMT1_CATRO; Caffeic acid 3-O-methyltransferase OS=Catharanthus roseus GN=COMT1 PE=2 SV=1}	{bvg:104902234; K13066 E2.1.1.68, COMT caffeic acid 3-O-methyltransferase 2.1.1.68 ko00940; Metabolism; Biosynthesis of other secondary metabolites; Phenylpropanoid biosynthesis}	{At5g54160; KOG3178 Hydroxyindole-O-methyltransferase and related SAM-dependent methyltransferases R General function prediction only ;}	{GO:0008168; methyltransferase activity; molecular_function GO:0008171; O-methyltransferase activity; molecular_function GO:0032259; methylation; biological_process GO:0006480; N-terminal protein amino acid methylation; biological_process GO:0046983; protein dimerization activity; molecular_function}	{HM204933.1; Camellia sinensis isolate yuanxiaolv caffeic acid O-methyltransferase (comt) mRNA, complete cds}	{PF00891:O-methyltransferase PF01728:FtsJ-like methyltransferase PF06859:Bicoid-interacting protein 3 (Bin3) PF08100:Dimerisation domain PF05891:AdoMet dependent proline di-methyltransferase}
transcript_HQ_SAB_transcript23934/f2p0/1380	598.923	54.7119	3.4524	8.7993e-56	7.2695e-55	{XP_019081134.1; PREDICTED: anthocyanidin reductase ((2S)-flavan-3-ol-forming)-like [Vitis vinifera]}	{sp|D7U6G6|ANRPN_VITVI; Anthocyanidin reductase ((2S)-flavan-3-ol-forming) OS=Vitis vinifera GN=ANR PE=3 SV=1}	{cam:101489772; - - - - -}	{At5g42800; KOG1502 Flavonol reductase/Cinnamoyl-CoA reductase V Defense mechanisms ;}	{GO:0050662; coenzyme binding; molecular_function GO:0055114; oxidation-reduction process; biological_process GO:0016491; oxidoreductase activity; molecular_function GO:0006694; steroid biosynthetic process; biological_process GO:0003824; NA GO:0016616; oxidoreductase activity, acting on the CH-OH group of donors, NAD or NADP as acceptor; molecular_function GO:0003854; 3-beta-hydroxy-delta5-stero…	{NA}	{PF00056:lactate/malate dehydrogenase, NAD binding domain PF03435:Saccharopine dehydrogenase NADP binding domain PF01073:3-beta hydroxysteroid dehydrogenase/isomerase family PF01370:NAD dependent epimerase/dehydratase family}
transcript_HQ_SAB_transcript23625/f2p0/1388	416.527	182.843	1.1878	4.9531e-09	1.1954e-08	{XP_010695556.1; PREDICTED: Cinnamoyl-CoA reductase-like SNL6 [Beta vulgaris subsp. vulgaris]}	{sp|Q0JKZ0|SNL6_ORYSJ; Cinnamoyl-CoA reductase-like SNL6 OS=Oryza sativa subsp. japonica GN=SNL6 PE=3 SV=1}	{pop:POPTR_0001s02320g; - - - - -}	{At2g23910; KOG1502 Flavonol reductase/Cinnamoyl-CoA reductase V Defense mechanisms ;}	{GO:0016616; oxidoreductase activity, acting on the CH-OH group of donors, NAD or NADP as acceptor; molecular_function GO:0003824; NA GO:0003854; 3-beta-hydroxy-delta5-steroid dehydrogenase activity; molecular_function GO:0055114; oxidation-reduction process; biological_process GO:0050662; coenzyme binding; molecular_function GO:0006694; steroid biosynthetic process; biological_process}	{XM_010697254.2; PREDICTED: Beta vulgaris subsp. vulgaris Cinnamoyl-CoA reductase-like SNL6 (LOC104908171), mRNA}	{PF01370:NAD dependent epimerase/dehydratase family PF01073:3-beta hydroxysteroid dehydrogenase/isomerase family}
transcript_HQ_SAB_transcript23501/f3p0/1420	176.991	553.896	-1.6459	1.37e-18	4.8313e-18	{KNA07730.1; hypothetical protein SOVF_168400 [Spinacia oleracea]}	{sp|P31655|CADH2_EUCGU; Probable cinnamyl alcohol dehydrogenase 2 OS=Eucalyptus gunnii GN=CAD2 PE=2 SV=1}	{jcu:105637089; K00083 E1.1.1.195 cinnamyl-alcohol dehydrogenase 1.1.1.195 ko00940; Metabolism; Biosynthesis of other secondary metabolites; Phenylpropanoid biosynthesis}	{At4g34230; KOG0023 Alcohol dehydrogenase, class V Q Secondary metabolites biosynthesis, transport and catabolism ;}	{GO:0004616; phosphogluconate dehydrogenase (decarboxylating) activity; molecular_function GO:0051287; NAD binding; molecular_function GO:0055114; oxidation-reduction process; biological_process}	{XM_010693369.2; PREDICTED: Beta vulgaris subsp. vulgaris probable cinnamyl alcohol dehydrogenase 1 (LOC104904943), mRNA}	{PF03446:NAD binding domain of 6-phosphogluconate dehydrogenase PF02826:D-isomer specific 2-hydroxyacid dehydrogenase, NAD binding domain PF00107:Zinc-binding dehydrogenase PF08240:Alcohol dehydrogenase GroES-like domain}
transcript_HQ_SAB_transcript23496/f2p0/1398	0	14.6174	#NAME?	0.030042	0.042577	{XP_010688496.1; PREDICTED: 4-coumarate--CoA ligase 1 [Beta vulgaris subsp. vulgaris]}	{sp|O24540|4CL_VANPL; 4-coumarate--CoA ligase OS=Vanilla planifolia GN=4CL PE=3 SV=1}	{tcc:TCM_038994; K01904 4CL 4-coumarate--CoA ligase 6.2.1.12 ko00360; Metabolism; Amino acid metabolism; Phenylalanine metabolism | ko00130; Metabolism; Metabolism of cofactors and vitamins; Ubiquinone and other terpenoid-quinone biosynthesis | ko00940; Metabolism; Biosynthesis of other secondary metabolites; Phenylpropanoid biosynthesis}	{At1g51680; KOG1176 Acyl-CoA synthetase I Lipid transport and metabolism ;}	{GO:0003824; NA GO:0008152; NA}	{XM_010690194.2; PREDICTED: Beta vulgaris subsp. vulgaris 4-coumarate--CoA ligase 1 (LOC104902419), mRNA}	{PF00501:AMP-binding enzyme}
transcript_HQ_SAB_transcript23396/f17p0/1384	825.887	1538.13	-0.89716	2.8504e-10	7.3026e-10	{KNA15947.1; hypothetical protein SOVF_093740 [Spinacia oleracea]}	{sp|Q8GU25|COMT1_ROSCH; Caffeic acid 3-O-methyltransferase OS=Rosa chinensis GN=COMT1 PE=2 SV=1}	{bvg:104888149; K13066 E2.1.1.68, COMT caffeic acid 3-O-methyltransferase 2.1.1.68 ko00940; Metabolism; Biosynthesis of other secondary metabolites; Phenylpropanoid biosynthesis}	{At5g54160; KOG3178 Hydroxyindole-O-methyltransferase and related SAM-dependent methyltransferases R General function prediction only ;}	{GO:0008171; O-methyltransferase activity; molecular_function GO:0046983; protein dimerization activity; molecular_function GO:0006480; N-terminal protein amino acid methylation; biological_process GO:0008168; methyltransferase activity; molecular_function}	{XM_010673030.2; PREDICTED: Beta vulgaris subsp. vulgaris caffeic acid 3-O-methyltransferase (LOC104888149), mRNA}	{PF00891:O-methyltransferase PF06859:Bicoid-interacting protein 3 (Bin3) PF05891:AdoMet dependent proline di-methyltransferase PF08100:Dimerisation domain}
transcript_HQ_SAB_transcript22989/f3p0/1437	260.57	619.463	-1.2493	4.0936e-13	1.1897e-12	{XP_010686560.1; PREDICTED: Cinnamoyl-CoA reductase 2 isoform X1 [Beta vulgaris subsp. vulgaris]}	{sp|Q9SAH9|CCR2_ARATH; Cinnamoyl-CoA reductase 2 OS=Arabidopsis thaliana GN=CCR2 PE=1 SV=1}	{bvg:104900750; - - - - -}	{At2g33590; KOG1502 Flavonol reductase/Cinnamoyl-CoA reductase V Defense mechanisms ;}	{GO:0016616; oxidoreductase activity, acting on the CH-OH group of donors, NAD or NADP as acceptor; molecular_function GO:0003824; NA GO:0003854; 3-beta-hydroxy-delta5-steroid dehydrogenase activity; molecular_function GO:0055114; oxidation-reduction process; biological_process GO:0050662; coenzyme binding; molecular_function GO:0006694; steroid biosynthetic process; biological_process}	{XM_010688258.2; PREDICTED: Beta vulgaris subsp. vulgaris Cinnamoyl-CoA reductase 2 (LOC104900750), transcript variant X1, mRNA}	{PF01073:3-beta hydroxysteroid dehydrogenase/isomerase family PF01370:NAD dependent epimerase/dehydratase family}
transcript_HQ_SAB_transcript22877/f4p0/1439	473.596	596.326	-0.33244	0.026551	0.037924	{XP_010680294.1; PREDICTED: probable mannitol dehydrogenase [Beta vulgaris subsp. vulgaris]}	{sp|P42734|CADH9_ARATH; Probable cinnamyl alcohol dehydrogenase 9 OS=Arabidopsis thaliana GN=CAD9 PE=2 SV=2}	{jcu:105636594; K00083 E1.1.1.195 cinnamyl-alcohol dehydrogenase 1.1.1.195 ko00940; Metabolism; Biosynthesis of other secondary metabolites; Phenylpropanoid biosynthesis}	{At4g39330; KOG0023 Alcohol dehydrogenase, class V Q Secondary metabolites biosynthesis, transport and catabolism ;}	{GO:0051287; NAD binding; molecular_function GO:0055114; oxidation-reduction process; biological_process}	{XM_010681992.2; PREDICTED: Beta vulgaris subsp. vulgaris probable mannitol dehydrogenase (LOC104895474), mRNA}	{PF00107:Zinc-binding dehydrogenase PF02826:D-isomer specific 2-hydroxyacid dehydrogenase, NAD binding domain PF08240:Alcohol dehydrogenase GroES-like domain}
transcript_HQ_SAB_transcript22787/f2p0/1445	523.203	724.87	-0.47035	0.0015554	0.002568	{XP_010685913.1; PREDICTED: Cinnamoyl-CoA reductase 1 [Beta vulgaris subsp. vulgaris]}	{sp|Q9S9N9|CCR1_ARATH; Cinnamoyl-CoA reductase 1 OS=Arabidopsis thaliana GN=CCR1 PE=1 SV=1}	{ini:109173789; - - - - -}	{At5g58490; KOG1502 Flavonol reductase/Cinnamoyl-CoA reductase V Defense mechanisms ;}	{GO:0016491; oxidoreductase activity; molecular_function GO:0006694; steroid biosynthetic process; biological_process GO:0055114; oxidation-reduction process; biological_process GO:0050662; coenzyme binding; molecular_function GO:0003854; 3-beta-hydroxy-delta5-steroid dehydrogenase activity; molecular_function GO:0016616; oxidoreductase activity, acting on the CH-OH group of donors, NAD or NADP a…	{XM_010687611.2; PREDICTED: Beta vulgaris subsp. vulgaris Cinnamoyl-CoA reductase 1 (LOC104900234), mRNA}	{PF01073:3-beta hydroxysteroid dehydrogenase/isomerase family PF01370:NAD dependent epimerase/dehydratase family PF03435:Saccharopine dehydrogenase NADP binding domain}
transcript_HQ_SAB_transcript22621/f2p0/1459	415.898	0	Inf	2.2223e-92	3.075e-91	{XP_010671333.1; PREDICTED: caffeic acid 3-O-methyltransferase 2 [Beta vulgaris subsp. vulgaris]}	{sp|Q43609|COMT1_PRUDU; Caffeic acid 3-O-methyltransferase OS=Prunus dulcis GN=COMT1 PE=2 SV=1}	{bvg:104888150; K13066 E2.1.1.68, COMT caffeic acid 3-O-methyltransferase 2.1.1.68 ko00940; Metabolism; Biosynthesis of other secondary metabolites; Phenylpropanoid biosynthesis}	{At5g54160; KOG3178 Hydroxyindole-O-methyltransferase and related SAM-dependent methyltransferases R General function prediction only ;}	{GO:0008168; methyltransferase activity; molecular_function GO:0006480; N-terminal protein amino acid methylation; biological_process GO:0046983; protein dimerization activity; molecular_function GO:0008171; O-methyltransferase activity; molecular_function}	{NA}	{PF08100:Dimerisation domain PF05891:AdoMet dependent proline di-methyltransferase PF00891:O-methyltransferase}
transcript_HQ_SAB_transcript22149/f39p0/1351	1184.14	4023.56	-1.7646	5.8275e-37	3.3997e-36	{XP_010673676.1; PREDICTED: Cinnamoyl-CoA reductase 1 isoform X2 [Beta vulgaris subsp. vulgaris]}	{sp|Q9S9N9|CCR1_ARATH; Cinnamoyl-CoA reductase 1 OS=Arabidopsis thaliana GN=CCR1 PE=1 SV=1}	{bvg:104890017; - - - - -}	{At5g19440; KOG1502 Flavonol reductase/Cinnamoyl-CoA reductase V Defense mechanisms ;}	{GO:0055114; oxidation-reduction process; biological_process GO:0050662; coenzyme binding; molecular_function GO:0006694; steroid biosynthetic process; biological_process GO:0019073; viral DNA genome packaging; biological_process GO:0016616; oxidoreductase activity, acting on the CH-OH group of donors, NAD or NADP as acceptor; molecular_function GO:0003824; NA GO:0003854; 3-beta-hydroxy-delta5-st…	{XM_010675374.2; PREDICTED: Beta vulgaris subsp. vulgaris Cinnamoyl-CoA reductase 1 (LOC104890017), transcript variant X2, mRNA}	{PF01073:3-beta hydroxysteroid dehydrogenase/isomerase family PF01370:NAD dependent epimerase/dehydratase family PF03581:Herpesvirus UL33-like protein}
transcript_HQ_SAB_transcript22021/f2p0/1497	32.5542	198.239	-2.6063	8.596e-14	2.5677e-13	{XP_010686578.1; PREDICTED: caffeoylshikimate esterase [Beta vulgaris subsp. vulgaris]}	{sp|Q9C942|CSE_ARATH; Caffeoylshikimate esterase OS=Arabidopsis thaliana GN=CSE PE=1 SV=1}	{vvi:100855015; K01054 MGLL acylglycerol lipase 3.1.1.23 ko00561; Metabolism; Lipid metabolism; Glycerolipid metabolism | ko04923; Organismal Systems; Endocrine system; Regulation of lipolysis in adipocytes | ko04723; Organismal Systems; Nervous system; Retrograde endocannabinoid signaling}	{At1g11090; KOG1455 Lysophospholipase I Lipid transport and metabolism ;}	{GO:0006508; proteolysis; biological_process GO:0016787; hydrolase activity; molecular_function GO:0008152; NA GO:0008236; serine-type peptidase activity; molecular_function}	{XM_010688276.2; PREDICTED: Beta vulgaris subsp. vulgaris caffeoylshikimate esterase (LOC104900771), mRNA}	{PF00326:Prolyl oligopeptidase family PF07859:alpha/beta hydrolase fold PF02230:Phospholipase/Carboxylesterase PF01738:Dienelactone hydrolase family}
transcript_HQ_SAB_transcript21987/f2p0/1508	868.371	1375.41	-0.66348	4.4246e-06	8.9624e-06	{XP_010666914.1; PREDICTED: probable cinnamyl alcohol dehydrogenase 6 [Beta vulgaris subsp. vulgaris]}	{sp|Q7XWU3|CADH6_ORYSJ; Probable cinnamyl alcohol dehydrogenase 6 OS=Oryza sativa subsp. japonica GN=CAD6 PE=2 SV=2}	{jcu:105635302; K00083 E1.1.1.195 cinnamyl-alcohol dehydrogenase 1.1.1.195 ko00940; Metabolism; Biosynthesis of other secondary metabolites; Phenylpropanoid biosynthesis}	{At4g39330; KOG0023 Alcohol dehydrogenase, class V Q Secondary metabolites biosynthesis, transport and catabolism ;}	{GO:0004616; phosphogluconate dehydrogenase (decarboxylating) activity; molecular_function GO:0051287; NAD binding; molecular_function GO:0055114; oxidation-reduction process; biological_process GO:0006813; potassium ion transport; biological_process GO:0016491; oxidoreductase activity; molecular_function GO:0019354; siroheme biosynthetic process; biological_process GO:0008677; 2-dehydropantoate …	{XM_010668612.2; PREDICTED: Beta vulgaris subsp. vulgaris probable cinnamyl alcohol dehydrogenase 6 (LOC104884022), mRNA}	{PF08240:Alcohol dehydrogenase GroES-like domain PF02558:Ketopantoate reductase PanE/ApbA PF03435:Saccharopine dehydrogenase NADP binding domain PF02254:TrkA-N domain PF02737:3-hydroxyacyl-CoA dehydrogenase, NAD binding domain PF02826:D-isomer specific 2-hydroxyacid dehydrogenase, NAD binding domain PF00107:Zinc-binding dehydrogenase PF03446:NAD binding domain of 6-phosphogluconate dehydrogenase …
transcript_HQ_SAB_transcript21986/f2p0/1493	196.015	835.705	-2.092	2.9711e-35	1.6634e-34	{XP_010683979.1; PREDICTED: caffeic acid 3-O-methyltransferase [Beta vulgaris subsp. vulgaris]}	{sp|Q43609|COMT1_PRUDU; Caffeic acid 3-O-methyltransferase OS=Prunus dulcis GN=COMT1 PE=2 SV=1}	{egr:104438876; - - - - -}	{At3g53140; KOG3178 Hydroxyindole-O-methyltransferase and related SAM-dependent methyltransferases R General function prediction only ;}	{GO:0008171; O-methyltransferase activity; molecular_function GO:0046983; protein dimerization activity; molecular_function GO:0008168; methyltransferase activity; molecular_function}	{XM_010685677.2; PREDICTED: Beta vulgaris subsp. vulgaris caffeic acid 3-O-methyltransferase (LOC104898582), mRNA}	{PF00891:O-methyltransferase PF08100:Dimerisation domain PF06859:Bicoid-interacting protein 3 (Bin3)}
transcript_HQ_SAB_transcript21840/f2p0/1497	160.536	263.715	-0.71608	0.0025737	0.0041361	{XP_010684530.1; PREDICTED: caffeoylshikimate esterase isoform X1 [Beta vulgaris subsp. vulgaris]}	{sp|Q9C942|CSE_ARATH; Caffeoylshikimate esterase OS=Arabidopsis thaliana GN=CSE PE=1 SV=1}	{nnu:104598938; K01054 MGLL acylglycerol lipase 3.1.1.23 ko00561; Metabolism; Lipid metabolism; Glycerolipid metabolism | ko04923; Organismal Systems; Endocrine system; Regulation of lipolysis in adipocytes | ko04723; Organismal Systems; Nervous system; Retrograde endocannabinoid signaling}	{At2g47630; KOG1455 Lysophospholipase I Lipid transport and metabolism ;}	{GO:0006508; proteolysis; biological_process GO:0016787; hydrolase activity; molecular_function GO:0008152; NA GO:0008236; serine-type peptidase activity; molecular_function}	{XM_010686228.2; PREDICTED: Beta vulgaris subsp. vulgaris caffeoylshikimate esterase (LOC104899091), transcript variant X1, mRNA}	{PF07859:alpha/beta hydrolase fold PF02230:Phospholipase/Carboxylesterase PF01738:Dienelactone hydrolase family PF02129:X-Pro dipeptidyl-peptidase (S15 family) PF00326:Prolyl oligopeptidase family}
transcript_HQ_SAB_transcript21713/f2p0/1520	206.394	575.047	-1.4783	5.9674e-16	1.9304e-15	{KNA07730.1; hypothetical protein SOVF_168400 [Spinacia oleracea]}	{sp|P30359|CADH1_TOBAC; Probable cinnamyl alcohol dehydrogenase 1 OS=Nicotiana tabacum GN=CAD14 PE=1 SV=1}	{jcu:105637089; K00083 E1.1.1.195 cinnamyl-alcohol dehydrogenase 1.1.1.195 ko00940; Metabolism; Biosynthesis of other secondary metabolites; Phenylpropanoid biosynthesis}	{At4g34230; KOG0023 Alcohol dehydrogenase, class V Q Secondary metabolites biosynthesis, transport and catabolism ;}	{GO:0004616; phosphogluconate dehydrogenase (decarboxylating) activity; molecular_function GO:0055114; oxidation-reduction process; biological_process GO:0051287; NAD binding; molecular_function}	{XM_010693369.2; PREDICTED: Beta vulgaris subsp. vulgaris probable cinnamyl alcohol dehydrogenase 1 (LOC104904943), mRNA}	{PF08240:Alcohol dehydrogenase GroES-like domain PF03446:NAD binding domain of 6-phosphogluconate dehydrogenase PF02826:D-isomer specific 2-hydroxyacid dehydrogenase, NAD binding domain PF00107:Zinc-binding dehydrogenase}
transcript_HQ_SAB_transcript21043/f2p0/1562	13309.1	47.9428	8.1169	2.9558e-146	6.9547e-145	{KNA18512.1; hypothetical protein SOVF_069860 [Spinacia oleracea]}	{sp|P52409|E13B_WHEAT; Glucan endo-1,3-Beta-glucosidase OS=Triticum aestivum GN=GLC1 PE=2 SV=1}	{bvg:104904063; - - - - -}	{NA}	{GO:0004553; hydrolase activity, hydrolyzing O-glycosyl compounds; molecular_function GO:0005975; carbohydrate metabolic process; biological_process}	{XM_010692248.2; PREDICTED: Beta vulgaris subsp. vulgaris glucan endo-1,3-Beta-glucosidase (LOC104904063), mRNA}	{PF00332:Glycosyl hydrolases family 17}
transcript_HQ_SAB_transcript20996/f3p0/1565	323.557	27.5115	3.5559	5.1483e-11	1.3629e-10	{KNA07730.1; hypothetical protein SOVF_168400 [Spinacia oleracea]}	{sp|P30359|CADH1_TOBAC; Probable cinnamyl alcohol dehydrogenase 1 OS=Nicotiana tabacum GN=CAD14 PE=1 SV=1}	{jcu:105637089; K00083 E1.1.1.195 cinnamyl-alcohol dehydrogenase 1.1.1.195 ko00940; Metabolism; Biosynthesis of other secondary metabolites; Phenylpropanoid biosynthesis}	{At4g34230; KOG0023 Alcohol dehydrogenase, class V Q Secondary metabolites biosynthesis, transport and catabolism ;}	{GO:0004616; phosphogluconate dehydrogenase (decarboxylating) activity; molecular_function GO:0051287; NAD binding; molecular_function GO:0055114; oxidation-reduction process; biological_process}	{XM_010693369.2; PREDICTED: Beta vulgaris subsp. vulgaris probable cinnamyl alcohol dehydrogenase 1 (LOC104904943), mRNA}	{PF08240:Alcohol dehydrogenase GroES-like domain PF03446:NAD binding domain of 6-phosphogluconate dehydrogenase PF00107:Zinc-binding dehydrogenase PF02826:D-isomer specific 2-hydroxyacid dehydrogenase, NAD binding domain}
transcript_HQ_SAB_transcript20954/f5p0/1558	531.355	1164.31	-1.1317	2.8595e-14	8.7036e-14	{KNA05086.1; hypothetical protein SOVF_193680 [Spinacia oleracea]}	{sp|P52409|E13B_WHEAT; Glucan endo-1,3-Beta-glucosidase OS=Triticum aestivum GN=GLC1 PE=2 SV=1}	{rcu:8278071; - - - - -}	{NA}	{GO:0005975; carbohydrate metabolic process; biological_process GO:0004553; hydrolase activity, hydrolyzing O-glycosyl compounds; molecular_function}	{AJ251646.1; Pisum sativum mRNA for beta-1,3 glucanase (gns2 gene)}	{PF00332:Glycosyl hydrolases family 17}
transcript_HQ_SAB_transcript20448/f2p0/1590	1441.88	0	Inf	2.2045e-260	1.4581e-258	{XP_010683979.1; PREDICTED: caffeic acid 3-O-methyltransferase [Beta vulgaris subsp. vulgaris]}	{sp|Q43609|COMT1_PRUDU; Caffeic acid 3-O-methyltransferase OS=Prunus dulcis GN=COMT1 PE=2 SV=1}	{egr:104438876; - - - - -}	{At3g53140; KOG3178 Hydroxyindole-O-methyltransferase and related SAM-dependent methyltransferases R General function prediction only ;}	{GO:0008168; methyltransferase activity; molecular_function GO:0046983; protein dimerization activity; molecular_function GO:0008171; O-methyltransferase activity; molecular_function}	{XM_010685677.2; PREDICTED: Beta vulgaris subsp. vulgaris caffeic acid 3-O-methyltransferase (LOC104898582), mRNA}	{PF00891:O-methyltransferase PF06859:Bicoid-interacting protein 3 (Bin3) PF08100:Dimerisation domain}
transcript_HQ_SAB_transcript20349/f2p0/1600	276.76	886.447	-1.6794	3.4206e-26	1.5247e-25	{XP_010681610.1; PREDICTED: caffeoylshikimate esterase isoform X1 [Beta vulgaris subsp. vulgaris]}	{sp|Q9C942|CSE_ARATH; Caffeoylshikimate esterase OS=Arabidopsis thaliana GN=CSE PE=1 SV=1}	{nnu:104602105; K01054 MGLL acylglycerol lipase 3.1.1.23 ko00561; Metabolism; Lipid metabolism; Glycerolipid metabolism | ko04923; Organismal Systems; Endocrine system; Regulation of lipolysis in adipocytes | ko04723; Organismal Systems; Nervous system; Retrograde endocannabinoid signaling}	{At1g77420; KOG1455 Lysophospholipase I Lipid transport and metabolism ;}	{GO:0009058; biosynthetic process; biological_process GO:0008236; serine-type peptidase activity; molecular_function GO:0016788; hydrolase activity, acting on ester bonds; molecular_function GO:0006508; proteolysis; biological_process GO:0016787; hydrolase activity; molecular_function}	{XM_010683308.2; PREDICTED: Beta vulgaris subsp. vulgaris caffeoylshikimate esterase (LOC104896551), transcript variant X1, mRNA}	{PF02230:Phospholipase/Carboxylesterase PF01738:Dienelactone hydrolase family PF00975:Thioesterase domain PF02129:X-Pro dipeptidyl-peptidase (S15 family) PF00326:Prolyl oligopeptidase family}
transcript_HQ_SAB_transcript19985/f3p0/1639	314.842	16.9526	4.215	1.6023e-08	3.7597e-08	{XP_010666914.1; PREDICTED: probable cinnamyl alcohol dehydrogenase 6 [Beta vulgaris subsp. vulgaris]}	{sp|Q7XWU3|CADH6_ORYSJ; Probable cinnamyl alcohol dehydrogenase 6 OS=Oryza sativa subsp. japonica GN=CAD6 PE=2 SV=2}	{jcu:105635302; K00083 E1.1.1.195 cinnamyl-alcohol dehydrogenase 1.1.1.195 ko00940; Metabolism; Biosynthesis of other secondary metabolites; Phenylpropanoid biosynthesis}	{At4g39330; KOG0023 Alcohol dehydrogenase, class V Q Secondary metabolites biosynthesis, transport and catabolism ;}	{GO:0051287; NAD binding; molecular_function GO:0055114; oxidation-reduction process; biological_process GO:0006813; potassium ion transport; biological_process GO:0016491; oxidoreductase activity; molecular_function GO:0004616; phosphogluconate dehydrogenase (decarboxylating) activity; molecular_function GO:0006779; porphyrin biosynthetic process; biological_process GO:0006631; fatty acid metabo…	{XM_010668612.2; PREDICTED: Beta vulgaris subsp. vulgaris probable cinnamyl alcohol dehydrogenase 6 (LOC104884022), mRNA}	{PF00107:Zinc-binding dehydrogenase PF02826:D-isomer specific 2-hydroxyacid dehydrogenase, NAD binding domain PF03446:NAD binding domain of 6-phosphogluconate dehydrogenase PF02737:3-hydroxyacyl-CoA dehydrogenase, NAD binding domain PF02254:TrkA-N domain PF08240:Alcohol dehydrogenase GroES-like domain PF02558:Ketopantoate reductase PanE/ApbA PF03435:Saccharopine dehydrogenase NADP binding domain …
transcript_HQ_SAB_transcript19435/f2p0/1662	0	603.115	#NAME?	6.1391e-120	1.1239e-118	{XP_010683005.1; PREDICTED: caffeic acid 3-O-methyltransferase isoform X2 [Beta vulgaris subsp. vulgaris]}	{sp|Q8W013|COMT1_CATRO; Caffeic acid 3-O-methyltransferase OS=Catharanthus roseus GN=COMT1 PE=2 SV=1}	{bvg:104902057; K13066 E2.1.1.68, COMT caffeic acid 3-O-methyltransferase 2.1.1.68 ko00940; Metabolism; Biosynthesis of other secondary metabolites; Phenylpropanoid biosynthesis}	{At5g54160; KOG3178 Hydroxyindole-O-methyltransferase and related SAM-dependent methyltransferases R General function prediction only ;}	{GO:0008168; methyltransferase activity; molecular_function GO:0008152; NA GO:0006355; regulation of transcription, DNA-dependent; biological_process GO:0003700; sequence-specific DNA binding transcription factor activity; molecular_function GO:0008171; O-methyltransferase activity; molecular_function GO:0046983; protein dimerization activity; molecular_function GO:0006480; N-terminal protein ami…	{XM_010036609.2; PREDICTED: Eucalyptus grandis caffeic acid 3-O-methyltransferase 1 (LOC104424243), mRNA}	{PF00891:O-methyltransferase PF01047:MarR family PF05891:AdoMet dependent proline di-methyltransferase PF08100:Dimerisation domain PF08241:Methyltransferase domain}
transcript_HQ_SAB_transcript18997/f2p0/1700	106.688	20.2535	2.3972	4.1204e-05	7.7735e-05	{KNA23093.1; hypothetical protein SOVF_027990, partial [Spinacia oleracea]}	{sp|P42734|CADH9_ARATH; Probable cinnamyl alcohol dehydrogenase 9 OS=Arabidopsis thaliana GN=CAD9 PE=2 SV=2}	{jcu:105636594; K00083 E1.1.1.195 cinnamyl-alcohol dehydrogenase 1.1.1.195 ko00940; Metabolism; Biosynthesis of other secondary metabolites; Phenylpropanoid biosynthesis}	{At4g39330; KOG0023 Alcohol dehydrogenase, class V Q Secondary metabolites biosynthesis, transport and catabolism ;}	{GO:0051287; NAD binding; molecular_function GO:0006779; porphyrin biosynthetic process; biological_process GO:0055114; oxidation-reduction process; biological_process GO:0019354; siroheme biosynthetic process; biological_process GO:0043115; precorrin-2 dehydrogenase activity; molecular_function}	{XM_010681992.2; PREDICTED: Beta vulgaris subsp. vulgaris probable mannitol dehydrogenase (LOC104895474), mRNA}	{PF00107:Zinc-binding dehydrogenase PF02826:D-isomer specific 2-hydroxyacid dehydrogenase, NAD binding domain PF13241:Putative NAD(P)-binding}
transcript_HQ_SAB_transcript18654/f3p0/1697	159.746	469.193	-1.5544	5.9652e-10	1.5044e-09	{XP_010673676.1; PREDICTED: Cinnamoyl-CoA reductase 1 isoform X2 [Beta vulgaris subsp. vulgaris]}	{sp|Q500U8|TKPR1_ARATH; Tetraketide alpha-pyrone reductase 1 OS=Arabidopsis thaliana GN=TKPR1 PE=1 SV=1}	{bvg:104890017; - - - - -}	{At5g19440; KOG1502 Flavonol reductase/Cinnamoyl-CoA reductase V Defense mechanisms ;}	{GO:0006694; steroid biosynthetic process; biological_process GO:0050662; coenzyme binding; molecular_function GO:0055114; oxidation-reduction process; biological_process GO:0003854; 3-beta-hydroxy-delta5-steroid dehydrogenase activity; molecular_function GO:0003824; NA GO:0016616; oxidoreductase activity, acting on the CH-OH group of donors, NAD or NADP as acceptor; molecular_function GO:0019073…	{XM_010675374.2; PREDICTED: Beta vulgaris subsp. vulgaris Cinnamoyl-CoA reductase 1 (LOC104890017), transcript variant X2, mRNA}	{PF01370:NAD dependent epimerase/dehydratase family PF01073:3-beta hydroxysteroid dehydrogenase/isomerase family PF03581:Herpesvirus UL33-like protein}
transcript_HQ_SAB_transcript18082/f2p0/1742	91.0132	172.491	-0.92237	0.0019244	0.0031389	{KNA11914.1; hypothetical protein SOVF_130850, partial [Spinacia oleracea]}	{sp|Q9S9N9|CCR1_ARATH; Cinnamoyl-CoA reductase 1 OS=Arabidopsis thaliana GN=CCR1 PE=1 SV=1}	{bvg:104890017; - - - - -}	{At5g19440; KOG1502 Flavonol reductase/Cinnamoyl-CoA reductase V Defense mechanisms ;}	{GO:0003854; 3-beta-hydroxy-delta5-steroid dehydrogenase activity; molecular_function GO:0016616; oxidoreductase activity, acting on the CH-OH group of donors, NAD or NADP as acceptor; molecular_function GO:0003824; NA GO:0006694; steroid biosynthetic process; biological_process GO:0055114; oxidation-reduction process; biological_process GO:0050662; coenzyme binding; molecular_function}	{XM_010675374.2; PREDICTED: Beta vulgaris subsp. vulgaris Cinnamoyl-CoA reductase 1 (LOC104890017), transcript variant X2, mRNA}	{PF01370:NAD dependent epimerase/dehydratase family PF01073:3-beta hydroxysteroid dehydrogenase/isomerase family}
transcript_HQ_SAB_transcript17717/f2p0/1763	22.1252	445.673	-4.3322	2.6908e-31	1.371e-30	{XP_010673676.1; PREDICTED: Cinnamoyl-CoA reductase 1 isoform X2 [Beta vulgaris subsp. vulgaris]}	{sp|Q500U8|TKPR1_ARATH; Tetraketide alpha-pyrone reductase 1 OS=Arabidopsis thaliana GN=TKPR1 PE=1 SV=1}	{bvg:104890017; - - - - -}	{At5g19440; KOG1502 Flavonol reductase/Cinnamoyl-CoA reductase V Defense mechanisms ;}	{GO:0019073; viral DNA genome packaging; biological_process GO:0016616; oxidoreductase activity, acting on the CH-OH group of donors, NAD or NADP as acceptor; molecular_function GO:0003824; NA GO:0003854; 3-beta-hydroxy-delta5-steroid dehydrogenase activity; molecular_function GO:0055114; oxidation-reduction process; biological_process GO:0050662; coenzyme binding; molecular_function GO:0006694; …	{XM_010675374.2; PREDICTED: Beta vulgaris subsp. vulgaris Cinnamoyl-CoA reductase 1 (LOC104890017), transcript variant X2, mRNA}	{PF03581:Herpesvirus UL33-like protein PF01370:NAD dependent epimerase/dehydratase family PF01073:3-beta hydroxysteroid dehydrogenase/isomerase family}
transcript_HQ_SAB_transcript17432/f3p0/1776	155.038	352.852	-1.1864	1.1773e-07	2.626e-07	{XP_010673492.1; PREDICTED: glucan endo-1,3-Beta-glucosidase 4 [Beta vulgaris subsp. vulgaris]}	{sp|Q94CD8|E134_ARATH; Glucan endo-1,3-Beta-glucosidase 4 OS=Arabidopsis thaliana GN=At3g13560 PE=1 SV=1}	{bvg:104889860; K19892 GN4 glucan endo-1,3-Beta-glucosidase 4 3.2.1.39 ko00500; Metabolism; Carbohydrate metabolism; Starch and sucrose metabolism}	{NA}	{GO:0005975; carbohydrate metabolic process; biological_process GO:0004553; hydrolase activity, hydrolyzing O-glycosyl compounds; molecular_function}	{XM_019248820.1; PREDICTED: Beta vulgaris subsp. vulgaris glucan endo-1,3-Beta-glucosidase 4 (LOC104889860), transcript variant X2, mRNA}	{PF00332:Glycosyl hydrolases family 17}
transcript_HQ_SAB_transcript17070/f2p0/1803	199.025	385.561	-0.95401	4.9633e-06	1.0015e-05	{XP_010673860.1; PREDICTED: Beta-glucosidase 42 isoform X1 [Beta vulgaris subsp. vulgaris]}	{sp|Q9FIW4|BGL42_ARATH; Beta-glucosidase 42 OS=Arabidopsis thaliana GN=BGLU42 PE=2 SV=1}	{bvg:104890172; K01188 E3.2.1.21 Beta-glucosidase 3.2.1.21 ko00500; Metabolism; Carbohydrate metabolism; Starch and sucrose metabolism | ko00460; Metabolism; Metabolism of other amino acids; Cyanoamino acid metabolism | ko00940; Metabolism; Biosynthesis of other secondary metabolites; Phenylpropanoid biosynthesis}	{At5g36890; KOG0626 Beta-glucosidase, lactase phlorizinhydrolase, and related proteins G Carbohydrate transport and metabolism ;}	{GO:0004553; hydrolase activity, hydrolyzing O-glycosyl compounds; molecular_function GO:0005975; carbohydrate metabolic process; biological_process}	{XM_010675558.2; PREDICTED: Beta vulgaris subsp. vulgaris Beta-glucosidase 42 (LOC104890172), transcript variant X1, mRNA}	{PF00150:Cellulase (glycosyl hydrolase family 5) PF00232:Glycosyl hydrolase family 1}
transcript_HQ_SAB_transcript17028/f2p0/1789	24.9193	217.625	-3.1265	1.2822e-18	4.5294e-18	{XP_010685886.1; PREDICTED: laccase-3-like [Beta vulgaris subsp. vulgaris]}	{sp|Q56YT0|LAC3_ARATH; Laccase-3 OS=Arabidopsis thaliana GN=LAC3 PE=2 SV=2}	{jcu:105640681; K05909 E1.10.3.2 laccase 1.10.3.2 -}	{At2g30210; KOG1263 Multicopper oxidases Q Secondary metabolites biosynthesis, transport and catabolism ;}	{GO:0055114; oxidation-reduction process; biological_process GO:0005507; copper ion binding; molecular_function GO:0016491; oxidoreductase activity; molecular_function}	{XM_019251034.1; PREDICTED: Beta vulgaris subsp. vulgaris laccase-3-like (LOC104900210), transcript variant X2, mRNA}	{PF00394:Multicopper oxidase PF07731:Multicopper oxidase PF07732:Multicopper oxidase}
transcript_HQ_SAB_transcript16758/f2p0/1760	493.896	113.577	2.1205	6.0184e-24	2.5157e-23	{KNA05014.1; hypothetical protein SOVF_194390 [Spinacia oleracea]}	{sp|A1CRV0|EXGA_ASPCL; Probable glucan 1,3-Beta-glucosidase A OS=Aspergillus clavatus (strain ATCC 1007 / CBS 513.65 / DSM 816 / NCTC 3887 / NRRL 1) GN=exgA PE=3 SV=2}	{cit:102627395; - - - - -}	{NA}	{GO:0019385; methanogenesis, from acetate; biological_process GO:0004553; hydrolase activity, hydrolyzing O-glycosyl compounds; molecular_function GO:0005975; carbohydrate metabolic process; biological_process GO:0051015; actin filament binding; molecular_function GO:0030674; protein binding, bridging; molecular_function}	{XM_010682727.2; PREDICTED: Beta vulgaris subsp. vulgaris glucan 1,3-Beta-glucosidase A (LOC104896043), transcript variant X2, mRNA}	{PF06268:Fascin domain PF02552:CO dehydrogenase beta subunit/acetyl-CoA synthase epsilon subunit PF00150:Cellulase (glycosyl hydrolase family 5)}
transcript_HQ_SAB_transcript16600/f3p0/1822	532.033	272.44	0.96558	4.2938e-08	9.8416e-08	{KNA22687.1; hypothetical protein SOVF_032040 [Spinacia oleracea]}	{sp|Q94CD8|E134_ARATH; Glucan endo-1,3-Beta-glucosidase 4 OS=Arabidopsis thaliana GN=At3g13560 PE=1 SV=1}	{bvg:104889860; K19892 GN4 glucan endo-1,3-Beta-glucosidase 4 3.2.1.39 ko00500; Metabolism; Carbohydrate metabolism; Starch and sucrose metabolism}	{NA}	{NA}	{XM_018637721.1; PREDICTED: Raphanus sativus glucan endo-1,3-Beta-glucosidase 4 (LOC108863329), mRNA}	{NA}
transcript_HQ_SAB_transcript16343/f3p0/1836	229.086	965.244	-2.075	1.1066e-37	6.5527e-37	{KNA05578.1; hypothetical protein SOVF_189070 [Spinacia oleracea]}	{sp|Q9ZU91|E133_ARATH; Glucan endo-1,3-Beta-glucosidase 3 OS=Arabidopsis thaliana GN=At2g01630 PE=1 SV=2}	{vvi:100261876; - - - - -}	{NA}	{GO:0005975; carbohydrate metabolic process; biological_process GO:0004553; hydrolase activity, hydrolyzing O-glycosyl compounds; molecular_function}	{XM_009397605.2; PREDICTED: Musa acuminata subsp. malaccensis glucan endo-1,3-Beta-glucosidase 6-like (LOC103981031), mRNA}	{PF00332:Glycosyl hydrolases family 17}
transcript_HQ_SAB_transcript16193/f2p0/1850	450.022	780.371	-0.79416	2.2748e-07	4.9953e-07	{KNA25154.1; hypothetical protein SOVF_008800 [Spinacia oleracea]}	{sp|Q7XKV4|BGL12_ORYSJ; Beta-glucosidase 12 OS=Oryza sativa subsp. japonica GN=BGLU12 PE=1 SV=2}	{bvg:104889924; K01188 E3.2.1.21 Beta-glucosidase 3.2.1.21 ko00500; Metabolism; Carbohydrate metabolism; Starch and sucrose metabolism | ko00460; Metabolism; Metabolism of other amino acids; Cyanoamino acid metabolism | ko00940; Metabolism; Biosynthesis of other secondary metabolites; Phenylpropanoid biosynthesis}	{At2g44450; KOG0626 Beta-glucosidase, lactase phlorizinhydrolase, and related proteins G Carbohydrate transport and metabolism ;}	{GO:0004553; hydrolase activity, hydrolyzing O-glycosyl compounds; molecular_function GO:0005975; carbohydrate metabolic process; biological_process}	{XM_002285546.3; PREDICTED: Vitis vinifera Beta-glucosidase 12-like (LOC100260409), mRNA}	{PF00232:Glycosyl hydrolase family 1}
transcript_HQ_SAB_transcript15960/f5p0/1843	38.5433	98.735	-1.3571	0.0021342	0.0034618	{KNA05578.1; hypothetical protein SOVF_189070 [Spinacia oleracea]}	{sp|Q9ZU91|E133_ARATH; Glucan endo-1,3-Beta-glucosidase 3 OS=Arabidopsis thaliana GN=At2g01630 PE=1 SV=2}	{vvi:100261876; - - - - -}	{NA}	{GO:0005975; carbohydrate metabolic process; biological_process GO:0004553; hydrolase activity, hydrolyzing O-glycosyl compounds; molecular_function}	{XM_009397605.2; PREDICTED: Musa acuminata subsp. malaccensis glucan endo-1,3-Beta-glucosidase 6-like (LOC103981031), mRNA}	{PF00332:Glycosyl hydrolases family 17}
transcript_HQ_SAB_transcript15700/f2p0/1888	61.5756	167.023	-1.4396	1.6489e-05	3.2028e-05	{XP_010673676.1; PREDICTED: Cinnamoyl-CoA reductase 1 isoform X2 [Beta vulgaris subsp. vulgaris]}	{sp|Q500U8|TKPR1_ARATH; Tetraketide alpha-pyrone reductase 1 OS=Arabidopsis thaliana GN=TKPR1 PE=1 SV=1}	{bvg:104890017; - - - - -}	{At5g19440; KOG1502 Flavonol reductase/Cinnamoyl-CoA reductase V Defense mechanisms ;}	{GO:0006694; steroid biosynthetic process; biological_process GO:0055114; oxidation-reduction process; biological_process GO:0050662; coenzyme binding; molecular_function GO:0003854; 3-beta-hydroxy-delta5-steroid dehydrogenase activity; molecular_function GO:0016616; oxidoreductase activity, acting on the CH-OH group of donors, NAD or NADP as acceptor; molecular_function GO:0019073; viral DNA gen…	{XM_010675374.2; PREDICTED: Beta vulgaris subsp. vulgaris Cinnamoyl-CoA reductase 1 (LOC104890017), transcript variant X2, mRNA}	{PF03581:Herpesvirus UL33-like protein PF01370:NAD dependent epimerase/dehydratase family PF01073:3-beta hydroxysteroid dehydrogenase/isomerase family}
transcript_HQ_SAB_transcript15462/f4p0/1888	1252.98	2438.77	-0.96079	2.7371e-12	7.6882e-12	{KNA14431.1; hypothetical protein SOVF_106700 [Spinacia oleracea]}	{sp|Q9C942|CSE_ARATH; Caffeoylshikimate esterase OS=Arabidopsis thaliana GN=CSE PE=1 SV=1}	{bvg:104885641; K01054 MGLL acylglycerol lipase 3.1.1.23 ko00561; Metabolism; Lipid metabolism; Glycerolipid metabolism | ko04923; Organismal Systems; Endocrine system; Regulation of lipolysis in adipocytes | ko04723; Organismal Systems; Nervous system; Retrograde endocannabinoid signaling}	{At5g11650; KOG1455 Lysophospholipase I Lipid transport and metabolism ;}	{GO:0016787; hydrolase activity; molecular_function GO:0009058; biosynthetic process; biological_process GO:0016788; hydrolase activity, acting on ester bonds; molecular_function}	{XR_002038812.1; PREDICTED: Beta vulgaris subsp. vulgaris monoacylglycerol lipase (LOC104885641), transcript variant X2, misc_RNA}	{PF06821:Serine hydrolase PF00975:Thioesterase domain}
transcript_HQ_SAB_transcript15105/f2p0/1932	1104.95	289.578	1.932	3.4528e-36	1.9829e-35	{KNA05086.1; hypothetical protein SOVF_193680 [Spinacia oleracea]}	{sp|P52409|E13B_WHEAT; Glucan endo-1,3-Beta-glucosidase OS=Triticum aestivum GN=GLC1 PE=2 SV=1}	{rcu:8278071; - - - - -}	{NA}	{GO:0004553; hydrolase activity, hydrolyzing O-glycosyl compounds; molecular_function GO:0005975; carbohydrate metabolic process; biological_process}	{XM_010687459.2; PREDICTED: Beta vulgaris subsp. vulgaris glucan endo-1,3-Beta-glucosidase (LOC104900112), mRNA}	{PF00332:Glycosyl hydrolases family 17}
transcript_HQ_SAB_transcript14823/f3p0/1932	1749.51	74.6067	4.5515	1.2029e-149	2.937e-148	{XP_010677906.1; PREDICTED: Beta-glucosidase 13 [Beta vulgaris subsp. vulgaris]}	{sp|Q7XKV4|BGL12_ORYSJ; Beta-glucosidase 12 OS=Oryza sativa subsp. japonica GN=BGLU12 PE=1 SV=2}	{bvg:104893501; K01188 E3.2.1.21 Beta-glucosidase 3.2.1.21 ko00500; Metabolism; Carbohydrate metabolism; Starch and sucrose metabolism | ko00460; Metabolism; Metabolism of other amino acids; Cyanoamino acid metabolism | ko00940; Metabolism; Biosynthesis of other secondary metabolites; Phenylpropanoid biosynthesis}	{At3g60130; KOG0626 Beta-glucosidase, lactase phlorizinhydrolase, and related proteins G Carbohydrate transport and metabolism ;}	{GO:0004553; hydrolase activity, hydrolyzing O-glycosyl compounds; molecular_function GO:0005975; carbohydrate metabolic process; biological_process}	{XM_010679604.2; PREDICTED: Beta vulgaris subsp. vulgaris Beta-glucosidase 13 (LOC104893501), mRNA}	{PF00232:Glycosyl hydrolase family 1 PF00150:Cellulase (glycosyl hydrolase family 5)}
transcript_HQ_SAB_transcript14751/f2p0/1936	9.90556	115.044	-3.5378	1.2065e-11	3.2966e-11	{XP_010676988.1; PREDICTED: probable glucan 1,3-Beta-glucosidase A [Beta vulgaris subsp. vulgaris]}	{sp|A2RAR6|EXGA_ASPNC; Probable glucan 1,3-Beta-glucosidase A OS=Aspergillus niger (strain CBS 513.88 / FGSC A1513) GN=exgA PE=3 SV=1}	{bvg:104892694; - - - - -}	{NA}	{GO:0004565; beta-galactosidase activity; molecular_function GO:0051015; actin filament binding; molecular_function GO:0030674; protein binding, bridging; molecular_function GO:0004553; hydrolase activity, hydrolyzing O-glycosyl compounds; molecular_function GO:0009341; beta-galactosidase complex; cellular_component GO:0005975; carbohydrate metabolic process; biological_process}	{XM_010678686.2; PREDICTED: Beta vulgaris subsp. vulgaris probable glucan 1,3-Beta-glucosidase A (LOC104892694), mRNA}	{PF02449:Beta-galactosidase PF06268:Fascin domain PF00150:Cellulase (glycosyl hydrolase family 5)}
transcript_HQ_SAB_transcript13932/f4p0/1909	15454.5	5141.31	1.5878	5.2765e-08	1.2033e-07	{XP_010690550.1; PREDICTED: glucan endo-1,3-Beta-glucosidase [Beta vulgaris subsp. vulgaris]}	{sp|P52409|E13B_WHEAT; Glucan endo-1,3-Beta-glucosidase OS=Triticum aestivum GN=GLC1 PE=2 SV=1}	{bvg:104904063; - - - - -}	{NA}	{GO:0005975; carbohydrate metabolic process; biological_process GO:0004553; hydrolase activity, hydrolyzing O-glycosyl compounds; molecular_function}	{XM_010692248.2; PREDICTED: Beta vulgaris subsp. vulgaris glucan endo-1,3-Beta-glucosidase (LOC104904063), mRNA}	{PF00332:Glycosyl hydrolases family 17}
transcript_HQ_SAB_transcript13675/f2p0/2013	78.6672	209.135	-1.4106	1.2369e-06	2.596e-06	{XP_010681610.1; PREDICTED: caffeoylshikimate esterase isoform X1 [Beta vulgaris subsp. vulgaris]}	{sp|Q9C942|CSE_ARATH; Caffeoylshikimate esterase OS=Arabidopsis thaliana GN=CSE PE=1 SV=1}	{nnu:104602105; K01054 MGLL acylglycerol lipase 3.1.1.23 ko00561; Metabolism; Lipid metabolism; Glycerolipid metabolism | ko04923; Organismal Systems; Endocrine system; Regulation of lipolysis in adipocytes | ko04723; Organismal Systems; Nervous system; Retrograde endocannabinoid signaling}	{At1g77420; KOG1455 Lysophospholipase I Lipid transport and metabolism ;}	{GO:0006508; proteolysis; biological_process GO:0016787; hydrolase activity; molecular_function GO:0009058; biosynthetic process; biological_process GO:0008236; serine-type peptidase activity; molecular_function GO:0016788; hydrolase activity, acting on ester bonds; molecular_function}	{XM_010683308.2; PREDICTED: Beta vulgaris subsp. vulgaris caffeoylshikimate esterase (LOC104896551), transcript variant X1, mRNA}	{PF02230:Phospholipase/Carboxylesterase PF01738:Dienelactone hydrolase family PF00975:Thioesterase domain PF00326:Prolyl oligopeptidase family PF02129:X-Pro dipeptidyl-peptidase (S15 family)}
transcript_HQ_SAB_transcript13537/f2p0/2017	0	77.424	#NAME?	7.4665e-16	2.4067e-15	{XP_010677916.1; PREDICTED: 4-coumarate--CoA ligase-like 9 [Beta vulgaris subsp. vulgaris]}	{sp|Q84P23|4CLL9_ARATH; 4-coumarate--CoA ligase-like 9 OS=Arabidopsis thaliana GN=4CLL9 PE=1 SV=2}	{bvg:104893505; - - - - -}	{At5g63380; KOG1176 Acyl-CoA synthetase I Lipid transport and metabolism ;}	{GO:0003824; NA GO:0008152; NA}	{XM_010679614.2; PREDICTED: Beta vulgaris subsp. vulgaris 4-coumarate--CoA ligase-like 9 (LOC104893505), mRNA}	{PF00501:AMP-binding enzyme}
transcript_HQ_SAB_transcript13414/f3p0/2041	747.255	1360.75	-0.86473	2.8929e-09	7.0681e-09	{KMT06914.1; hypothetical protein BVRB_6g152510 [Beta vulgaris subsp. vulgaris]}	{sp|Q42707|F26G_CHESP; Furostanol glycoside 26-O-Beta-glucosidase OS=Cheilocostus speciosus GN=F26G PE=1 SV=1}	{bvg:104893499; K01188 E3.2.1.21 Beta-glucosidase 3.2.1.21 ko00500; Metabolism; Carbohydrate metabolism; Starch and sucrose metabolism | ko00460; Metabolism; Metabolism of other amino acids; Cyanoamino acid metabolism | ko00940; Metabolism; Biosynthesis of other secondary metabolites; Phenylpropanoid biosynthesis}	{At1g26560; KOG0626 Beta-glucosidase, lactase phlorizinhydrolase, and related proteins G Carbohydrate transport and metabolism ;}	{GO:0004553; hydrolase activity, hydrolyzing O-glycosyl compounds; molecular_function GO:0005975; carbohydrate metabolic process; biological_process}	{XM_010684720.2; PREDICTED: Beta vulgaris subsp. vulgaris Beta-glucosidase 13 (LOC104897773), mRNA}	{PF00232:Glycosyl hydrolase family 1}
transcript_HQ_SAB_transcript12658/f4p0/2083	230.762	495.415	-1.1022	2.8958e-09	7.0744e-09	{XP_010689117.1; PREDICTED: 4-coumarate--CoA ligase-like 7 [Beta vulgaris subsp. vulgaris]}	{sp|Q9M0X9|4CLL7_ARATH; 4-coumarate--CoA ligase-like 7 OS=Arabidopsis thaliana GN=4CLL7 PE=1 SV=1}	{sot:102597265; K01904 4CL 4-coumarate--CoA ligase 6.2.1.12 ko00360; Metabolism; Amino acid metabolism; Phenylalanine metabolism | ko00130; Metabolism; Metabolism of cofactors and vitamins; Ubiquinone and other terpenoid-quinone biosynthesis | ko00940; Metabolism; Biosynthesis of other secondary metabolites; Phenylpropanoid biosynthesis}	{At4g05160; KOG1176 Acyl-CoA synthetase I Lipid transport and metabolism ;}	{GO:0003824; NA GO:0008152; NA}	{BT133931.1; Lotus japonicus clone JCVI-FLLj-14G22 unknown mRNA}	{PF00501:AMP-binding enzyme}
transcript_HQ_SAB_transcript12243/f3p0/2115	184.242	486.523	-1.4009	1.8155e-12	5.1469e-12	{XP_010677904.1; PREDICTED: Beta-glucosidase 13 [Beta vulgaris subsp. vulgaris]}	{sp|B8AVF0|BGL12_ORYSI; Beta-glucosidase 12 OS=Oryza sativa subsp. indica GN=BGLU12 PE=3 SV=1}	{bvg:104893499; K01188 E3.2.1.21 Beta-glucosidase 3.2.1.21 ko00500; Metabolism; Carbohydrate metabolism; Starch and sucrose metabolism | ko00460; Metabolism; Metabolism of other amino acids; Cyanoamino acid metabolism | ko00940; Metabolism; Biosynthesis of other secondary metabolites; Phenylpropanoid biosynthesis}	{At3g60130; KOG0626 Beta-glucosidase, lactase phlorizinhydrolase, and related proteins G Carbohydrate transport and metabolism ;}	{GO:0005975; carbohydrate metabolic process; biological_process GO:0004553; hydrolase activity, hydrolyzing O-glycosyl compounds; molecular_function}	{XM_010679602.2; PREDICTED: Beta vulgaris subsp. vulgaris Beta-glucosidase 13 (LOC104893499), mRNA}	{PF00232:Glycosyl hydrolase family 1 PF00150:Cellulase (glycosyl hydrolase family 5)}
transcript_HQ_SAB_transcript12143/f2p0/2115	329.474	718.053	-1.1239	4.1619e-12	1.158e-11	{XP_010679832.1; PREDICTED: cytochrome P450 84A1 [Beta vulgaris subsp. vulgaris]}	{sp|Q42600|C84A1_ARATH; Cytochrome P450 84A1 OS=Arabidopsis thaliana GN=CYP84A1 PE=1 SV=1}	{cic:CICLE_v10025382mg; K09755 CYP84A, F5H ferulate-5-hydroxylase 1.14.-.- ko00940; Metabolism; Biosynthesis of other secondary metabolites; Phenylpropanoid biosynthesis}	{At4g36220; KOG0156 Cytochrome P450 CYP2 subfamily Q Secondary metabolites biosynthesis, transport and catabolism ;}	{GO:0055114; oxidation-reduction process; biological_process GO:0016705; oxidoreductase activity, acting on paired donors, with incorporation or reduction of molecular oxygen; molecular_function GO:0020037; heme binding; molecular_function GO:0005506; iron ion binding; molecular_function}	{XM_010681530.2; PREDICTED: Beta vulgaris subsp. vulgaris cytochrome P450 84A1 (LOC104895114), mRNA}	{PF00067:Cytochrome P450}
transcript_HQ_SAB_transcript12036/f3p0/2127	0	69.2818	#NAME?	2.3086e-08	5.3667e-08	{XP_010677904.1; PREDICTED: Beta-glucosidase 13 [Beta vulgaris subsp. vulgaris]}	{sp|B8AVF0|BGL12_ORYSI; Beta-glucosidase 12 OS=Oryza sativa subsp. indica GN=BGLU12 PE=3 SV=1}	{bvg:104893499; K01188 E3.2.1.21 Beta-glucosidase 3.2.1.21 ko00500; Metabolism; Carbohydrate metabolism; Starch and sucrose metabolism | ko00460; Metabolism; Metabolism of other amino acids; Cyanoamino acid metabolism | ko00940; Metabolism; Biosynthesis of other secondary metabolites; Phenylpropanoid biosynthesis}	{At3g60130; KOG0626 Beta-glucosidase, lactase phlorizinhydrolase, and related proteins G Carbohydrate transport and metabolism ;}	{GO:0004553; hydrolase activity, hydrolyzing O-glycosyl compounds; molecular_function GO:0005975; carbohydrate metabolic process; biological_process}	{NA}	{PF00232:Glycosyl hydrolase family 1 PF00150:Cellulase (glycosyl hydrolase family 5)}
transcript_HQ_SAB_transcript11930/f3p0/2148	472.344	1343.14	-1.5077	4.6516e-24	1.9516e-23	{XP_010688496.1; PREDICTED: 4-coumarate--CoA ligase 1 [Beta vulgaris subsp. vulgaris]}	{sp|P31684|4CL1_SOLTU; 4-coumarate--CoA ligase 1 OS=Solanum tuberosum GN=4CL1 PE=3 SV=1}	{vvi:100254698; K01904 4CL 4-coumarate--CoA ligase 6.2.1.12 ko00360; Metabolism; Amino acid metabolism; Phenylalanine metabolism | ko00130; Metabolism; Metabolism of cofactors and vitamins; Ubiquinone and other terpenoid-quinone biosynthesis | ko00940; Metabolism; Biosynthesis of other secondary metabolites; Phenylpropanoid biosynthesis}	{At1g51680; KOG1176 Acyl-CoA synthetase I Lipid transport and metabolism ;}	{GO:0008152; NA GO:0003824; NA}	{XM_010690194.2; PREDICTED: Beta vulgaris subsp. vulgaris 4-coumarate--CoA ligase 1 (LOC104902419), mRNA}	{PF00501:AMP-binding enzyme}
transcript_HQ_SAB_transcript11907/f2p0/2136	197.519	3983.66	-4.334	1.8718e-159	4.9799e-158	{XP_010677904.1; PREDICTED: Beta-glucosidase 13 [Beta vulgaris subsp. vulgaris]}	{sp|B8AVF0|BGL12_ORYSI; Beta-glucosidase 12 OS=Oryza sativa subsp. indica GN=BGLU12 PE=3 SV=1}	{bvg:104893499; K01188 E3.2.1.21 Beta-glucosidase 3.2.1.21 ko00500; Metabolism; Carbohydrate metabolism; Starch and sucrose metabolism | ko00460; Metabolism; Metabolism of other amino acids; Cyanoamino acid metabolism | ko00940; Metabolism; Biosynthesis of other secondary metabolites; Phenylpropanoid biosynthesis}	{At3g60130; KOG0626 Beta-glucosidase, lactase phlorizinhydrolase, and related proteins G Carbohydrate transport and metabolism ;}	{GO:0004553; hydrolase activity, hydrolyzing O-glycosyl compounds; molecular_function GO:0005975; carbohydrate metabolic process; biological_process}	{NA}	{PF00232:Glycosyl hydrolase family 1 PF00150:Cellulase (glycosyl hydrolase family 5)}
transcript_HQ_SAB_transcript11064/f7p0/2203	158.47	502.863	-1.666	8.1741e-17	2.7273e-16	{KNA07968.1; hypothetical protein SOVF_167000 [Spinacia oleracea]}	{sp|Q9FLB5|LAC12_ARATH; Laccase-12 OS=Arabidopsis thaliana GN=LAC12 PE=2 SV=1}	{vvi:100262045; K05909 E1.10.3.2 laccase 1.10.3.2 -}	{At5g05390; KOG1263 Multicopper oxidases Q Secondary metabolites biosynthesis, transport and catabolism ;}	{GO:0016491; oxidoreductase activity; molecular_function GO:0055114; oxidation-reduction process; biological_process GO:0005507; copper ion binding; molecular_function}	{XM_010694615.2; PREDICTED: Beta vulgaris subsp. vulgaris laccase-12 (LOC104905953), mRNA}	{PF07732:Multicopper oxidase PF07731:Multicopper oxidase PF00394:Multicopper oxidase}
transcript_HQ_SAB_transcript10905/f5p0/2172	89.0843	1396.53	-3.9705	1.6758e-115	2.9321e-114	{XP_010677904.1; PREDICTED: Beta-glucosidase 13 [Beta vulgaris subsp. vulgaris]}	{sp|B8AVF0|BGL12_ORYSI; Beta-glucosidase 12 OS=Oryza sativa subsp. indica GN=BGLU12 PE=3 SV=1}	{bvg:104893499; K01188 E3.2.1.21 Beta-glucosidase 3.2.1.21 ko00500; Metabolism; Carbohydrate metabolism; Starch and sucrose metabolism | ko00460; Metabolism; Metabolism of other amino acids; Cyanoamino acid metabolism | ko00940; Metabolism; Biosynthesis of other secondary metabolites; Phenylpropanoid biosynthesis}	{At3g60130; KOG0626 Beta-glucosidase, lactase phlorizinhydrolase, and related proteins G Carbohydrate transport and metabolism ;}	{GO:0004553; hydrolase activity, hydrolyzing O-glycosyl compounds; molecular_function GO:0005975; carbohydrate metabolic process; biological_process}	{XM_010679602.2; PREDICTED: Beta vulgaris subsp. vulgaris Beta-glucosidase 13 (LOC104893499), mRNA}	{PF00150:Cellulase (glycosyl hydrolase family 5) PF00232:Glycosyl hydrolase family 1}
transcript_HQ_SAB_transcript10680/f3p0/2237	495.984	845.757	-0.76995	3.6843e-07	7.986e-07	{XP_010677916.1; PREDICTED: 4-coumarate--CoA ligase-like 9 [Beta vulgaris subsp. vulgaris]}	{sp|Q84P23|4CLL9_ARATH; 4-coumarate--CoA ligase-like 9 OS=Arabidopsis thaliana GN=4CLL9 PE=1 SV=2}	{bvg:104893505; - - - - -}	{At5g63380; KOG1176 Acyl-CoA synthetase I Lipid transport and metabolism ;}	{GO:0003824; NA GO:0008152; NA}	{XM_010679614.2; PREDICTED: Beta vulgaris subsp. vulgaris 4-coumarate--CoA ligase-like 9 (LOC104893505), mRNA}	{PF00501:AMP-binding enzyme}
transcript_HQ_SAB_transcript10444/f7p0/2215	134.021	338.386	-1.3362	6.3078e-07	1.348e-06	{XP_010677916.1; PREDICTED: 4-coumarate--CoA ligase-like 9 [Beta vulgaris subsp. vulgaris]}	{sp|Q84P23|4CLL9_ARATH; 4-coumarate--CoA ligase-like 9 OS=Arabidopsis thaliana GN=4CLL9 PE=1 SV=2}	{bvg:104893505; - - - - -}	{At5g63380; KOG1176 Acyl-CoA synthetase I Lipid transport and metabolism ;}	{GO:0003824; NA GO:0008152; NA}	{XM_010679614.2; PREDICTED: Beta vulgaris subsp. vulgaris 4-coumarate--CoA ligase-like 9 (LOC104893505), mRNA}	{PF00501:AMP-binding enzyme}
transcript_HQ_SAB_transcript10225/f3p0/2280	271.627	155.642	0.8034	0.00082704	0.001401	{XP_010685489.1; PREDICTED: uncharacterized protein LOC104899896 [Beta vulgaris subsp. vulgaris]}	{sp|A7LXU3|BGH3B_BACO1; Beta-glucosidase BoGH3B OS=Bacteroides ovatus (strain ATCC 8483 / DSM 1896 / JCM 5824 / NCTC 11153) GN=BACOVA_02659 PE=1 SV=1}	{cic:CICLE_v10028018mg; K05349 bglX Beta-glucosidase 3.2.1.21 ko00500; Metabolism; Carbohydrate metabolism; Starch and sucrose metabolism | ko00460; Metabolism; Metabolism of other amino acids; Cyanoamino acid metabolism | ko00940; Metabolism; Biosynthesis of other secondary metabolites; Phenylpropanoid biosynthesis}	{NA}	{GO:0005975; carbohydrate metabolic process; biological_process GO:0004553; hydrolase activity, hydrolyzing O-glycosyl compounds; molecular_function}	{XM_010687187.2; PREDICTED: Beta vulgaris subsp. vulgaris Beta-glucosidase BoGH3B (LOC104899896), mRNA}	{PF01915:Glycosyl hydrolase family 3 C-terminal domain PF00933:Glycosyl hydrolase family 3 N terminal domain}
transcript_HQ_BAB_transcript6740/f5p0/2912	1756.39	218.677	3.0057	2.6358e-19	9.5507e-19	{XP_010672074.1; PREDICTED: glucan endo-1,3-Beta-glucosidase 8 [Beta vulgaris subsp. vulgaris]}	{sp|Q6NKW9|E138_ARATH; Glucan endo-1,3-Beta-glucosidase 8 OS=Arabidopsis thaliana GN=At1g64760 PE=1 SV=2}	{bvg:104888732; - - - - -}	{NA}	{GO:0004553; hydrolase activity, hydrolyzing O-glycosyl compounds; molecular_function GO:0005975; carbohydrate metabolic process; biological_process}	{XM_010673772.2; PREDICTED: Beta vulgaris subsp. vulgaris glucan endo-1,3-Beta-glucosidase 8 (LOC104888732), mRNA}	{PF00332:Glycosyl hydrolases family 17}
transcript_HQ_BAB_transcript5522/f2p0/3127	269.076	41.7731	2.6874	2.9664e-16	9.6917e-16	{KNA10356.1; hypothetical protein SOVF_145050 [Spinacia oleracea]}	{sp|Q6NKW9|E138_ARATH; Glucan endo-1,3-Beta-glucosidase 8 OS=Arabidopsis thaliana GN=At1g64760 PE=1 SV=2}	{bvg:104888732; - - - - -}	{NA}	{GO:0004553; hydrolase activity, hydrolyzing O-glycosyl compounds; molecular_function GO:0005975; carbohydrate metabolic process; biological_process}	{XM_010673772.2; PREDICTED: Beta vulgaris subsp. vulgaris glucan endo-1,3-Beta-glucosidase 8 (LOC104888732), mRNA}	{PF00332:Glycosyl hydrolases family 17}
transcript_HQ_BAB_transcript5114/f2p0/3276	808.964	4.62275	7.4512	5.5794e-20	2.0623e-19	{KNA10356.1; hypothetical protein SOVF_145050 [Spinacia oleracea]}	{sp|Q6NKW9|E138_ARATH; Glucan endo-1,3-Beta-glucosidase 8 OS=Arabidopsis thaliana GN=At1g64760 PE=1 SV=2}	{bvg:104888732; - - - - -}	{NA}	{GO:0005975; carbohydrate metabolic process; biological_process GO:0004553; hydrolase activity, hydrolyzing O-glycosyl compounds; molecular_function}	{XM_010673772.2; PREDICTED: Beta vulgaris subsp. vulgaris glucan endo-1,3-Beta-glucosidase 8 (LOC104888732), mRNA}	{PF00332:Glycosyl hydrolases family 17}
transcript_HQ_BAB_transcript4777/f2p0/3321	1923.93	62.393	4.9465	4.365e-22	1.7183e-21	{KNA10356.1; hypothetical protein SOVF_145050 [Spinacia oleracea]}	{sp|Q6NKW9|E138_ARATH; Glucan endo-1,3-Beta-glucosidase 8 OS=Arabidopsis thaliana GN=At1g64760 PE=1 SV=2}	{bvg:104888732; - - - - -}	{NA}	{GO:0004553; hydrolase activity, hydrolyzing O-glycosyl compounds; molecular_function GO:0005975; carbohydrate metabolic process; biological_process}	{XM_010673772.2; PREDICTED: Beta vulgaris subsp. vulgaris glucan endo-1,3-Beta-glucosidase 8 (LOC104888732), mRNA}	{PF00332:Glycosyl hydrolases family 17}
transcript_HQ_BAB_transcript3570/f2p0/3536	307.569	15.978	4.2667	3.0797e-26	1.3739e-25	{KNA04118.1; hypothetical protein SOVF_202610 [Spinacia oleracea]}	{NA}	{rcu:8271922; - - - - -}	{NA}	{NA}	{XM_012717608.1; PREDICTED: Cicer arietinum glucan endo-1,3-Beta-glucosidase 14 (LOC101504732), transcript variant X2, mRNA}	{NA}
transcript_HQ_BAB_transcript20137/f7p0/1187	998.732	426.797	1.2265	1.676e-14	5.152e-14	{KNA21673.1; hypothetical protein SOVF_041080 [Spinacia oleracea]}	{sp|O49499|CAMT4_ARATH; Caffeoyl-CoA O-methyltransferase 1 OS=Arabidopsis thaliana GN=CCOAOMT1 PE=1 SV=1}	{thj:104804378; K00588 E2.1.1.104 caffeoyl-CoA O-methyltransferase 2.1.1.104 ko00360; Metabolism; Amino acid metabolism; Phenylalanine metabolism | ko00940; Metabolism; Biosynthesis of other secondary metabolites; Phenylpropanoid biosynthesis | ko00945; Metabolism; Biosynthesis of other secondary metabolites; Stilbenoid, diarylheptanoid and gingerol biosynthesis | ko00941; Metabolism; Biosynthesi…	{At4g34050; KOG1663 O-methyltransferase Q Secondary metabolites biosynthesis, transport and catabolism ;}	{GO:0008171; O-methyltransferase activity; molecular_function}	{XM_010692314.2; PREDICTED: Beta vulgaris subsp. vulgaris caffeoyl-CoA O-methyltransferase (LOC104904122), mRNA}	{PF01596:O-methyltransferase}
transcript_HQ_BAB_transcript19521/f3p0/1460	123.249	0	Inf	2.0186e-27	9.2905e-27	{XP_010683979.1; PREDICTED: caffeic acid 3-O-methyltransferase [Beta vulgaris subsp. vulgaris]}	{sp|A8J6X1|BMT_GLELI; Bergaptol O-methyltransferase OS=Glehnia littoralis GN=BMT PE=1 SV=1}	{egr:104438876; - - - - -}	{At3g53140; KOG3178 Hydroxyindole-O-methyltransferase and related SAM-dependent methyltransferases R General function prediction only ;}	{GO:0008171; O-methyltransferase activity; molecular_function GO:0008168; methyltransferase activity; molecular_function GO:0046983; protein dimerization activity; molecular_function}	{XM_010685677.2; PREDICTED: Beta vulgaris subsp. vulgaris caffeic acid 3-O-methyltransferase (LOC104898582), mRNA}	{PF08100:Dimerisation domain PF06859:Bicoid-interacting protein 3 (Bin3) PF00891:O-methyltransferase}
transcript_HQ_BAB_transcript19382/f2p0/1445	2088.92	0	Inf	6.5043e-274	4.9806e-272	{KNA07730.1; hypothetical protein SOVF_168400 [Spinacia oleracea]}	{sp|P30359|CADH1_TOBAC; Probable cinnamyl alcohol dehydrogenase 1 OS=Nicotiana tabacum GN=CAD14 PE=1 SV=1}	{jcu:105637089; K00083 E1.1.1.195 cinnamyl-alcohol dehydrogenase 1.1.1.195 ko00940; Metabolism; Biosynthesis of other secondary metabolites; Phenylpropanoid biosynthesis}	{At4g34230; KOG0023 Alcohol dehydrogenase, class V Q Secondary metabolites biosynthesis, transport and catabolism ;}	{GO:0051287; NAD binding; molecular_function GO:0004616; phosphogluconate dehydrogenase (decarboxylating) activity; molecular_function GO:0055114; oxidation-reduction process; biological_process}	{XM_010693369.2; PREDICTED: Beta vulgaris subsp. vulgaris probable cinnamyl alcohol dehydrogenase 1 (LOC104904943), mRNA}	{PF00107:Zinc-binding dehydrogenase PF02826:D-isomer specific 2-hydroxyacid dehydrogenase, NAD binding domain PF03446:NAD binding domain of 6-phosphogluconate dehydrogenase PF08240:Alcohol dehydrogenase GroES-like domain}
transcript_HQ_BAB_transcript19333/f2p0/1435	412.271	48.6881	3.082	7.0601e-08	1.5975e-07	{XP_010673676.1; PREDICTED: Cinnamoyl-CoA reductase 1 isoform X2 [Beta vulgaris subsp. vulgaris]}	{sp|Q9S9N9|CCR1_ARATH; Cinnamoyl-CoA reductase 1 OS=Arabidopsis thaliana GN=CCR1 PE=1 SV=1}	{bvg:104890017; - - - - -}	{At5g19440; KOG1502 Flavonol reductase/Cinnamoyl-CoA reductase V Defense mechanisms ;}	{GO:0050662; coenzyme binding; molecular_function GO:0006694; steroid biosynthetic process; biological_process GO:0003854; 3-beta-hydroxy-delta5-steroid dehydrogenase activity; molecular_function GO:0016616; oxidoreductase activity, acting on the CH-OH group of donors, NAD or NADP as acceptor; molecular_function GO:0019073; viral DNA genome packaging; biological_process GO:0055114; oxidation-redu…	{XM_010675374.2; PREDICTED: Beta vulgaris subsp. vulgaris Cinnamoyl-CoA reductase 1 (LOC104890017), transcript variant X2, mRNA}	{PF03581:Herpesvirus UL33-like protein PF01073:3-beta hydroxysteroid dehydrogenase/isomerase family PF01370:NAD dependent epimerase/dehydratase family}
transcript_HQ_BAB_transcript19212/f2p0/1478	28.9508	7.82397	1.8876	0.030247	0.042848	{XP_010671333.1; PREDICTED: caffeic acid 3-O-methyltransferase 2 [Beta vulgaris subsp. vulgaris]}	{sp|Q43609|COMT1_PRUDU; Caffeic acid 3-O-methyltransferase OS=Prunus dulcis GN=COMT1 PE=2 SV=1}	{bvg:104888150; K13066 E2.1.1.68, COMT caffeic acid 3-O-methyltransferase 2.1.1.68 ko00940; Metabolism; Biosynthesis of other secondary metabolites; Phenylpropanoid biosynthesis}	{At5g54160; KOG3178 Hydroxyindole-O-methyltransferase and related SAM-dependent methyltransferases R General function prediction only ;}	{GO:0008168; methyltransferase activity; molecular_function GO:0046983; protein dimerization activity; molecular_function GO:0008171; O-methyltransferase activity; molecular_function GO:0006480; N-terminal protein amino acid methylation; biological_process}	{NA}	{PF00891:O-methyltransferase PF05891:AdoMet dependent proline di-methyltransferase PF08100:Dimerisation domain}
transcript_HQ_BAB_transcript18969/f2p0/1527	729.093	65.881	3.4682	7.1478e-39	4.3345e-38	{XP_010681610.1; PREDICTED: caffeoylshikimate esterase isoform X1 [Beta vulgaris subsp. vulgaris]}	{sp|Q9C942|CSE_ARATH; Caffeoylshikimate esterase OS=Arabidopsis thaliana GN=CSE PE=1 SV=1}	{nnu:104602105; K01054 MGLL acylglycerol lipase 3.1.1.23 ko00561; Metabolism; Lipid metabolism; Glycerolipid metabolism | ko04923; Organismal Systems; Endocrine system; Regulation of lipolysis in adipocytes | ko04723; Organismal Systems; Nervous system; Retrograde endocannabinoid signaling}	{At1g77420; KOG1455 Lysophospholipase I Lipid transport and metabolism ;}	{GO:0009058; biosynthetic process; biological_process GO:0016787; hydrolase activity; molecular_function GO:0016788; hydrolase activity, acting on ester bonds; molecular_function GO:0008236; serine-type peptidase activity; molecular_function GO:0006508; proteolysis; biological_process}	{XM_010683308.2; PREDICTED: Beta vulgaris subsp. vulgaris caffeoylshikimate esterase (LOC104896551), transcript variant X1, mRNA}	{PF00975:Thioesterase domain PF02129:X-Pro dipeptidyl-peptidase (S15 family) PF00326:Prolyl oligopeptidase family PF01738:Dienelactone hydrolase family PF02230:Phospholipase/Carboxylesterase}
transcript_HQ_BAB_transcript18880/f2p0/1533	450.203	35.0416	3.6834	2.6097e-46	1.8232e-45	{XP_010687750.1; PREDICTED: caffeic acid 3-O-methyltransferase [Beta vulgaris subsp. vulgaris]}	{sp|Q9XGW0|COMT1_OCIBA; Caffeic acid 3-O-methyltransferase 1 OS=Ocimum basilicum GN=COMT1 PE=2 SV=1}	{bvg:104901795; K13066 E2.1.1.68, COMT caffeic acid 3-O-methyltransferase 2.1.1.68 ko00940; Metabolism; Biosynthesis of other secondary metabolites; Phenylpropanoid biosynthesis}	{At5g54160; KOG3178 Hydroxyindole-O-methyltransferase and related SAM-dependent methyltransferases R General function prediction only ;}	{GO:0046983; protein dimerization activity; molecular_function GO:0008168; methyltransferase activity; molecular_function GO:0006480; N-terminal protein amino acid methylation; biological_process GO:0008171; O-methyltransferase activity; molecular_function}	{XM_010689448.2; PREDICTED: Beta vulgaris subsp. vulgaris caffeic acid 3-O-methyltransferase (LOC104901795), mRNA}	{PF05891:AdoMet dependent proline di-methyltransferase PF00891:O-methyltransferase PF08100:Dimerisation domain}
transcript_HQ_BAB_transcript18291/f2p0/1635	608.327	0	Inf	3.8289e-133	7.965e-132	{XP_010683005.1; PREDICTED: caffeic acid 3-O-methyltransferase isoform X2 [Beta vulgaris subsp. vulgaris]}	{sp|Q8W013|COMT1_CATRO; Caffeic acid 3-O-methyltransferase OS=Catharanthus roseus GN=COMT1 PE=2 SV=1}	{bvg:104902234; K13066 E2.1.1.68, COMT caffeic acid 3-O-methyltransferase 2.1.1.68 ko00940; Metabolism; Biosynthesis of other secondary metabolites; Phenylpropanoid biosynthesis}	{At5g54160; KOG3178 Hydroxyindole-O-methyltransferase and related SAM-dependent methyltransferases R General function prediction only ;}	{GO:0008152; NA GO:0046983; protein dimerization activity; molecular_function GO:0008168; methyltransferase activity; molecular_function GO:0008171; O-methyltransferase activity; molecular_function GO:0006480; N-terminal protein amino acid methylation; biological_process}	{XM_010689183.2; PREDICTED: Beta vulgaris subsp. vulgaris caffeic acid 3-O-methyltransferase (LOC104901566), mRNA}	{PF00891:O-methyltransferase PF05891:AdoMet dependent proline di-methyltransferase PF08100:Dimerisation domain PF08241:Methyltransferase domain PF06859:Bicoid-interacting protein 3 (Bin3)}
transcript_HQ_BAB_transcript17874/f4p0/1665	1127.47	309.241	1.8663	8.2971e-34	4.4933e-33	{KNA07730.1; hypothetical protein SOVF_168400 [Spinacia oleracea]}	{sp|P30359|CADH1_TOBAC; Probable cinnamyl alcohol dehydrogenase 1 OS=Nicotiana tabacum GN=CAD14 PE=1 SV=1}	{jcu:105637089; K00083 E1.1.1.195 cinnamyl-alcohol dehydrogenase 1.1.1.195 ko00940; Metabolism; Biosynthesis of other secondary metabolites; Phenylpropanoid biosynthesis}	{At4g34230; KOG0023 Alcohol dehydrogenase, class V Q Secondary metabolites biosynthesis, transport and catabolism ;}	{GO:0055114; oxidation-reduction process; biological_process GO:0051287; NAD binding; molecular_function GO:0004616; phosphogluconate dehydrogenase (decarboxylating) activity; molecular_function}	{XM_010693369.2; PREDICTED: Beta vulgaris subsp. vulgaris probable cinnamyl alcohol dehydrogenase 1 (LOC104904943), mRNA}	{PF00107:Zinc-binding dehydrogenase PF02826:D-isomer specific 2-hydroxyacid dehydrogenase, NAD binding domain PF08240:Alcohol dehydrogenase GroES-like domain PF03446:NAD binding domain of 6-phosphogluconate dehydrogenase}
transcript_HQ_BAB_transcript17598/f6p0/1700	1599.66	978.918	0.7085	7.0834e-07	1.5089e-06	{KNA05086.1; hypothetical protein SOVF_193680 [Spinacia oleracea]}	{sp|P52409|E13B_WHEAT; Glucan endo-1,3-Beta-glucosidase OS=Triticum aestivum GN=GLC1 PE=2 SV=1}	{rcu:8278071; - - - - -}	{NA}	{GO:0004553; hydrolase activity, hydrolyzing O-glycosyl compounds; molecular_function GO:0005975; carbohydrate metabolic process; biological_process}	{XM_010687459.2; PREDICTED: Beta vulgaris subsp. vulgaris glucan endo-1,3-Beta-glucosidase (LOC104900112), mRNA}	{PF00332:Glycosyl hydrolases family 17}
transcript_HQ_BAB_transcript17338/f4p0/1810	6437.38	0	Inf	1.1097e-82	1.3657e-81	{XP_010690550.1; PREDICTED: glucan endo-1,3-Beta-glucosidase [Beta vulgaris subsp. vulgaris]}	{sp|P52409|E13B_WHEAT; Glucan endo-1,3-Beta-glucosidase OS=Triticum aestivum GN=GLC1 PE=2 SV=1}	{bvg:104904063; - - - - -}	{NA}	{GO:0004553; hydrolase activity, hydrolyzing O-glycosyl compounds; molecular_function GO:0005975; carbohydrate metabolic process; biological_process}	{XM_010692248.2; PREDICTED: Beta vulgaris subsp. vulgaris glucan endo-1,3-Beta-glucosidase (LOC104904063), mRNA}	{PF00332:Glycosyl hydrolases family 17}
transcript_HQ_BAB_transcript16892/f2p0/1811	181.532	90.707	1.0009	0.00075124	0.0012768	{KNA25153.1; hypothetical protein SOVF_008790 [Spinacia oleracea]}	{sp|B8AVF0|BGL12_ORYSI; Beta-glucosidase 12 OS=Oryza sativa subsp. indica GN=BGLU12 PE=3 SV=1}	{bvg:104889926; K01188 E3.2.1.21 Beta-glucosidase 3.2.1.21 ko00500; Metabolism; Carbohydrate metabolism; Starch and sucrose metabolism | ko00460; Metabolism; Metabolism of other amino acids; Cyanoamino acid metabolism | ko00940; Metabolism; Biosynthesis of other secondary metabolites; Phenylpropanoid biosynthesis}	{At5g42260; KOG0626 Beta-glucosidase, lactase phlorizinhydrolase, and related proteins G Carbohydrate transport and metabolism ;}	{GO:0005975; carbohydrate metabolic process; biological_process GO:0004553; hydrolase activity, hydrolyzing O-glycosyl compounds; molecular_function}	{XM_010675265.2; PREDICTED: Beta vulgaris subsp. vulgaris Beta-glucosidase 13 (LOC104889926), transcript variant X1, mRNA}	{PF00232:Glycosyl hydrolase family 1}
transcript_HQ_BAB_transcript16148/f2p0/1903	122.95	6.12504	4.3272	3.4153e-16	1.114e-15	{XP_010673860.1; PREDICTED: Beta-glucosidase 42 isoform X1 [Beta vulgaris subsp. vulgaris]}	{sp|Q9FIW4|BGL42_ARATH; Beta-glucosidase 42 OS=Arabidopsis thaliana GN=BGLU42 PE=2 SV=1}	{bvg:104890172; K01188 E3.2.1.21 Beta-glucosidase 3.2.1.21 ko00500; Metabolism; Carbohydrate metabolism; Starch and sucrose metabolism | ko00460; Metabolism; Metabolism of other amino acids; Cyanoamino acid metabolism | ko00940; Metabolism; Biosynthesis of other secondary metabolites; Phenylpropanoid biosynthesis}	{At5g36890; KOG0626 Beta-glucosidase, lactase phlorizinhydrolase, and related proteins G Carbohydrate transport and metabolism ;}	{GO:0004553; hydrolase activity, hydrolyzing O-glycosyl compounds; molecular_function GO:0005975; carbohydrate metabolic process; biological_process}	{XM_010675558.2; PREDICTED: Beta vulgaris subsp. vulgaris Beta-glucosidase 42 (LOC104890172), transcript variant X1, mRNA}	{PF00150:Cellulase (glycosyl hydrolase family 5) PF00232:Glycosyl hydrolase family 1}
transcript_HQ_BAB_transcript15621/f2p0/1933	834.046	206.835	2.0116	2.4474e-33	1.3082e-32	{KNA14431.1; hypothetical protein SOVF_106700 [Spinacia oleracea]}	{sp|Q9C942|CSE_ARATH; Caffeoylshikimate esterase OS=Arabidopsis thaliana GN=CSE PE=1 SV=1}	{bvg:104885641; K01054 MGLL acylglycerol lipase 3.1.1.23 ko00561; Metabolism; Lipid metabolism; Glycerolipid metabolism | ko04923; Organismal Systems; Endocrine system; Regulation of lipolysis in adipocytes | ko04723; Organismal Systems; Nervous system; Retrograde endocannabinoid signaling}	{At5g11650; KOG1455 Lysophospholipase I Lipid transport and metabolism ;}	{GO:0016788; hydrolase activity, acting on ester bonds; molecular_function GO:0016787; hydrolase activity; molecular_function GO:0009058; biosynthetic process; biological_process}	{XR_002038812.1; PREDICTED: Beta vulgaris subsp. vulgaris monoacylglycerol lipase (LOC104885641), transcript variant X2, misc_RNA}	{PF06821:Serine hydrolase PF00975:Thioesterase domain}
transcript_HQ_BAB_transcript15361/f3p0/1983	2750.65	269.878	3.3494	3.599e-104	5.5919e-103	{KNA04118.1; hypothetical protein SOVF_202610 [Spinacia oleracea]}	{sp|Q9ZQG9|E1314_ARATH; Glucan endo-1,3-Beta-glucosidase 14 OS=Arabidopsis thaliana GN=At2g27500 PE=1 SV=2}	{nnu:104588656; - - - - -}	{NA}	{GO:0005975; carbohydrate metabolic process; biological_process GO:0004553; hydrolase activity, hydrolyzing O-glycosyl compounds; molecular_function GO:0008108; UDP-glucose:hexose-1-phosphate uridylyltransferase activity; molecular_function GO:0006012; galactose metabolic process; biological_process}	{XM_010687701.2; PREDICTED: Beta vulgaris subsp. vulgaris glucan endo-1,3-Beta-glucosidase 14 (LOC104900311), mRNA}	{PF02744:Galactose-1-phosphate uridyl transferase, C-terminal domain PF00332:Glycosyl hydrolases family 17}
transcript_HQ_BAB_transcript15357/f4p0/1967	382.574	0	Inf	4.2867e-85	5.4905e-84	{KNA05578.1; hypothetical protein SOVF_189070 [Spinacia oleracea]}	{sp|Q9M069|E137_ARATH; Glucan endo-1,3-Beta-glucosidase 7 OS=Arabidopsis thaliana GN=At4g34480 PE=1 SV=2}	{cit:102614404; - - - - -}	{NA}	{GO:0004553; hydrolase activity, hydrolyzing O-glycosyl compounds; molecular_function GO:0005975; carbohydrate metabolic process; biological_process}	{XM_009397605.2; PREDICTED: Musa acuminata subsp. malaccensis glucan endo-1,3-Beta-glucosidase 6-like (LOC103981031), mRNA}	{PF00332:Glycosyl hydrolases family 17}
transcript_HQ_BAB_transcript14805/f9p0/2012	1092.52	383.48	1.5104	1.6432e-23	6.768e-23	{XP_010677904.1; PREDICTED: Beta-glucosidase 13 [Beta vulgaris subsp. vulgaris]}	{sp|Q7XKV4|BGL12_ORYSJ; Beta-glucosidase 12 OS=Oryza sativa subsp. japonica GN=BGLU12 PE=1 SV=2}	{bvg:104893499; K01188 E3.2.1.21 Beta-glucosidase 3.2.1.21 ko00500; Metabolism; Carbohydrate metabolism; Starch and sucrose metabolism | ko00460; Metabolism; Metabolism of other amino acids; Cyanoamino acid metabolism | ko00940; Metabolism; Biosynthesis of other secondary metabolites; Phenylpropanoid biosynthesis}	{At2g44450; KOG0626 Beta-glucosidase, lactase phlorizinhydrolase, and related proteins G Carbohydrate transport and metabolism ;}	{GO:0005975; carbohydrate metabolic process; biological_process GO:0004553; hydrolase activity, hydrolyzing O-glycosyl compounds; molecular_function}	{XM_010679602.2; PREDICTED: Beta vulgaris subsp. vulgaris Beta-glucosidase 13 (LOC104893499), mRNA}	{PF00150:Cellulase (glycosyl hydrolase family 5) PF00232:Glycosyl hydrolase family 1}
transcript_HQ_BAB_transcript14801/f16p0/2018	282.549	22.3904	3.6576	3.0026e-30	1.4915e-29	{XP_010676930.1; PREDICTED: glucan endo-1,3-Beta-glucosidase 11 [Beta vulgaris subsp. vulgaris]}	{sp|Q8L868|E1311_ARATH; Glucan endo-1,3-Beta-glucosidase 11 OS=Arabidopsis thaliana GN=At1g32860 PE=1 SV=1}	{bvg:104892644; - - - - -}	{NA}	{GO:0004553; hydrolase activity, hydrolyzing O-glycosyl compounds; molecular_function GO:0005975; carbohydrate metabolic process; biological_process}	{XM_010678628.2; PREDICTED: Beta vulgaris subsp. vulgaris glucan endo-1,3-Beta-glucosidase 11 (LOC104892644), mRNA}	{PF00332:Glycosyl hydrolases family 17}
transcript_HQ_BAB_transcript14656/f2p0/2038	119.938	45.3252	1.4039	0.00030006	0.00052766	{XP_010690891.1; PREDICTED: laccase-17 [Beta vulgaris subsp. vulgaris]}	{sp|Q9FJD5|LAC17_ARATH; Laccase-17 OS=Arabidopsis thaliana GN=LAC17 PE=2 SV=1}	{bvg:104904359; K05909 E1.10.3.2 laccase 1.10.3.2 -}	{At5g60020; KOG1263 Multicopper oxidases Q Secondary metabolites biosynthesis, transport and catabolism ;}	{GO:0005507; copper ion binding; molecular_function GO:0016491; oxidoreductase activity; molecular_function GO:0055114; oxidation-reduction process; biological_process}	{XM_010692589.2; PREDICTED: Beta vulgaris subsp. vulgaris laccase-17 (LOC104904359), mRNA}	{PF07731:Multicopper oxidase PF07732:Multicopper oxidase PF00394:Multicopper oxidase}
transcript_HQ_BAB_transcript14532/f2p0/2069	19.8076	50.2846	-1.3441	0.027152	0.038726	{KNA05578.1; hypothetical protein SOVF_189070 [Spinacia oleracea]}	{sp|Q9FJU9|E1313_ARATH; Glucan endo-1,3-Beta-glucosidase 13 OS=Arabidopsis thaliana GN=At5g56590 PE=1 SV=1}	{cit:102614404; - - - - -}	{NA}	{GO:0005975; carbohydrate metabolic process; biological_process GO:0004553; hydrolase activity, hydrolyzing O-glycosyl compounds; molecular_function}	{XM_009397605.2; PREDICTED: Musa acuminata subsp. malaccensis glucan endo-1,3-Beta-glucosidase 6-like (LOC103981031), mRNA}	{PF00332:Glycosyl hydrolases family 17}
transcript_HQ_BAB_transcript14431/f4p0/2062	334.547	118.119	1.502	1.8186e-10	4.7059e-10	{XP_010685719.1; PREDICTED: laccase-17 [Beta vulgaris subsp. vulgaris]}	{sp|Q9FJD5|LAC17_ARATH; Laccase-17 OS=Arabidopsis thaliana GN=LAC17 PE=2 SV=1}	{cic:CICLE_v10011362mg; K05909 E1.10.3.2 laccase 1.10.3.2 -}	{At5g60020; KOG1263 Multicopper oxidases Q Secondary metabolites biosynthesis, transport and catabolism ;}	{GO:0005507; copper ion binding; molecular_function GO:0016491; oxidoreductase activity; molecular_function GO:0055114; oxidation-reduction process; biological_process}	{XM_010687416.1; PREDICTED: Beta vulgaris subsp. vulgaris laccase-17 (LOC104900077), mRNA}	{PF00394:Multicopper oxidase PF07732:Multicopper oxidase PF07731:Multicopper oxidase}
transcript_HQ_BAB_transcript13691/f2p0/2161	176.872	106.292	0.73467	0.012331	0.018374	{XP_010685615.1; PREDICTED: laccase-4 [Beta vulgaris subsp. vulgaris]}	{sp|O80434|LAC4_ARATH; Laccase-4 OS=Arabidopsis thaliana GN=IRX12 PE=2 SV=2}	{bvg:104892204; K05909 E1.10.3.2 laccase 1.10.3.2 -}	{At2g38080; KOG1263 Multicopper oxidases Q Secondary metabolites biosynthesis, transport and catabolism ;}	{GO:0005507; copper ion binding; molecular_function GO:0016491; oxidoreductase activity; molecular_function GO:0055114; oxidation-reduction process; biological_process}	{XM_010678055.2; PREDICTED: Beta vulgaris subsp. vulgaris laccase-4-like (LOC104892204), mRNA}	{PF07732:Multicopper oxidase PF07731:Multicopper oxidase PF00394:Multicopper oxidase}
transcript_HQ_BAB_transcript12602/f4p0/2259	181.705	256.244	-0.49592	0.031211	0.044135	{XP_010677916.1; PREDICTED: 4-coumarate--CoA ligase-like 9 [Beta vulgaris subsp. vulgaris]}	{sp|Q84P23|4CLL9_ARATH; 4-coumarate--CoA ligase-like 9 OS=Arabidopsis thaliana GN=4CLL9 PE=1 SV=2}	{bvg:104893505; - - - - -}	{At5g63380; KOG1176 Acyl-CoA synthetase I Lipid transport and metabolism ;}	{GO:0003824; NA GO:0008152; NA}	{XM_010679614.2; PREDICTED: Beta vulgaris subsp. vulgaris 4-coumarate--CoA ligase-like 9 (LOC104893505), mRNA}	{PF00501:AMP-binding enzyme}
transcript_HQ_BAB_transcript12582/f3p0/2269	144.137	0.292286	8.9458	6.5363e-31	3.3059e-30	{XP_010677916.1; PREDICTED: 4-coumarate--CoA ligase-like 9 [Beta vulgaris subsp. vulgaris]}	{sp|Q84P23|4CLL9_ARATH; 4-coumarate--CoA ligase-like 9 OS=Arabidopsis thaliana GN=4CLL9 PE=1 SV=2}	{bvg:104893505; - - - - -}	{At5g63380; KOG1176 Acyl-CoA synthetase I Lipid transport and metabolism ;}	{GO:0003824; NA GO:0008152; NA}	{XM_010679614.2; PREDICTED: Beta vulgaris subsp. vulgaris 4-coumarate--CoA ligase-like 9 (LOC104893505), mRNA}	{PF00501:AMP-binding enzyme}
transcript_HQ_BAB_transcript12377/f9p0/2281	597.797	367.35	0.7025	1.8432e-05	3.5668e-05	{XP_010690098.1; PREDICTED: laccase-4 [Beta vulgaris subsp. vulgaris]}	{sp|Q0IQU1|LAC22_ORYSJ; Laccase-22 OS=Oryza sativa subsp. japonica GN=LAC22 PE=2 SV=2}	{bvg:104903698; K05909 E1.10.3.2 laccase 1.10.3.2 -}	{At2g38080; KOG1263 Multicopper oxidases Q Secondary metabolites biosynthesis, transport and catabolism ;}	{GO:0055114; oxidation-reduction process; biological_process GO:0016491; oxidoreductase activity; molecular_function GO:0005507; copper ion binding; molecular_function}	{XM_010691796.2; PREDICTED: Beta vulgaris subsp. vulgaris laccase-4 (LOC104903698), mRNA}	{PF00394:Multicopper oxidase PF07731:Multicopper oxidase PF07732:Multicopper oxidase}
transcript_HQ_BAB_transcript11259/f2p0/2420	69.0595	21.6457	1.6738	0.0021694	0.0035159	{XP_010677916.1; PREDICTED: 4-coumarate--CoA ligase-like 9 [Beta vulgaris subsp. vulgaris]}	{sp|Q84P23|4CLL9_ARATH; 4-coumarate--CoA ligase-like 9 OS=Arabidopsis thaliana GN=4CLL9 PE=1 SV=2}	{bvg:104893505; - - - - -}	{At5g63380; KOG1176 Acyl-CoA synthetase I Lipid transport and metabolism ;}	{GO:0003824; NA GO:0008152; NA}	{XM_010679614.2; PREDICTED: Beta vulgaris subsp. vulgaris 4-coumarate--CoA ligase-like 9 (LOC104893505), mRNA}	{PF00501:AMP-binding enzyme}
transcript_HQ_BAB_transcript11188/f2p0/2450	3280.26	17.2758	7.5689	2.8963e-114	4.99e-113	{KNA10356.1; hypothetical protein SOVF_145050 [Spinacia oleracea]}	{sp|Q6NKW9|E138_ARATH; Glucan endo-1,3-Beta-glucosidase 8 OS=Arabidopsis thaliana GN=At1g64760 PE=1 SV=2}	{bvg:104888732; - - - - -}	{NA}	{GO:0005975; carbohydrate metabolic process; biological_process GO:0004553; hydrolase activity, hydrolyzing O-glycosyl compounds; molecular_function}	{XM_010673772.2; PREDICTED: Beta vulgaris subsp. vulgaris glucan endo-1,3-Beta-glucosidase 8 (LOC104888732), mRNA}	{PF00332:Glycosyl hydrolases family 17}
transcript_HQ_BAB_transcript11154/f7p0/2353	266.843	144.735	0.88257	0.00032273	0.00056593	{XP_010689117.1; PREDICTED: 4-coumarate--CoA ligase-like 7 [Beta vulgaris subsp. vulgaris]}	{sp|Q9M0X9|4CLL7_ARATH; 4-coumarate--CoA ligase-like 7 OS=Arabidopsis thaliana GN=4CLL7 PE=1 SV=1}	{sot:102597265; K01904 4CL 4-coumarate--CoA ligase 6.2.1.12 ko00360; Metabolism; Amino acid metabolism; Phenylalanine metabolism | ko00130; Metabolism; Metabolism of cofactors and vitamins; Ubiquinone and other terpenoid-quinone biosynthesis | ko00940; Metabolism; Biosynthesis of other secondary metabolites; Phenylpropanoid biosynthesis}	{At4g05160; KOG1176 Acyl-CoA synthetase I Lipid transport and metabolism ;}	{GO:0003824; NA GO:0008152; NA}	{XM_010690815.2; PREDICTED: Beta vulgaris subsp. vulgaris 4-coumarate--CoA ligase-like 7 (LOC104902885), mRNA}	{PF00501:AMP-binding enzyme}
