# Supplementary material for: Characterization of the gene expression profile response to drought stress in Haloxylon using PacBio single-molecule real-time and Illumina sequencing
Source: Front Plant Sci. 2022 Aug 16;13:981029. doi: 10.3389/fpls.2022.981029 (PMC9424927; doi:10.3389/fpls.2022.981029)
Supplement: Supplementary file 8 [file Table_8.XLSX]

## Sheet: LS vs. HS
Table S8 DEGs encoding drought stress proteins in Haloxylon ammodendron
Gene_id	log2FoldChange	pval	padj	{nr}	{SwissProt}	{KEGG}	{KOG}	{GO}	{nt}	{pfam}
transcript_HQ_SAB_transcript9608/f7p0/2333	0.12013	0.00072588	0.0016978	{XP_015058100.1; PREDICTED: heat shock cognate 70 kDa protein 2-like [Solanum pennellii]}	{sp|P27322|HSP72_SOLLC; Heat shock cognate 70 kDa protein 2 OS=Solanum lycopersicum GN=HSC-2 PE=2 SV=1}	{nta:107768506; - - - - -}	{At5g02500; KOG0101 Molecular chaperones HSP70/HSC70, HSP70 superfamily O Posttranslational modification, protein turnover, chaperones ;}	{GO:0016787; hydrolase activity; molecular_function GO:0005975; carbohydrate metabolic process; biological_process GO:0000902; cell morphogenesis; biological_process GO:0030436; asexual sporulation; biological_process GO:0016773; phosphotransferase activity, alcohol group as acceptor; molecular_function}	{AF033852.1; Spinacia oleracea cytosolic heat shock 70 protein (HSC70) mRNA, complete cds}	{PF14098:Small, acid-soluble spore protein I PF01968:Hydantoinase/oxoprolinase PF02782:FGGY family of carbohydrate kinases, C-terminal domain PF06723:MreB/Mbl protein}
transcript_HQ_SAB_transcript9415/f5p0/2270	-0.99648	0.0073887	0.014838	{XP_010677532.1; PREDICTED: heat shock cognate 70 kDa protein-like [Beta vulgaris subsp. vulgaris]}	{sp|P09189|HSP7C_PETHY; Heat shock cognate 70 kDa protein OS=Petunia hybrida GN=HSP70 PE=2 SV=1}	{bvg:104893144; K03283 HSPA1_8 heat shock 70kDa protein 1/8 - ko03040; Genetic Information Processing; Transcription; Spliceosome | ko04141; Genetic Information Processing; Folding, sorting and degradation; Protein processing in endoplasmic reticulum | ko04010; Environmental Information Processing; Signal transduction; MAPK signaling pathway | ko04144; Cellular Processes; Transport and catabolism…	{At3g12580; KOG0101 Molecular chaperones HSP70/HSC70, HSP70 superfamily O Posttranslational modification, protein turnover, chaperones ;}	{GO:0005975; carbohydrate metabolic process; biological_process GO:0000902; cell morphogenesis; biological_process GO:0006508; proteolysis; biological_process GO:0008233; peptidase activity; molecular_function GO:0016773; phosphotransferase activity, alcohol group as acceptor; molecular_function}	{NA}	{PF06723:MreB/Mbl protein PF03785:Peptidase family C25, C terminal ig-like domain PF02782:FGGY family of carbohydrate kinases, C-terminal domain}
transcript_HQ_SAB_transcript9407/f3p0/2350	-1.5879	1.7272e-170	8.5662e-169	{XP_008370710.1; PREDICTED: heat shock cognate 70 kDa protein 2 [Malus domestica]}	{sp|P22953|MD37E_ARATH; Probable mediator of RNA polymerase II transcription subunit 37e OS=Arabidopsis thaliana GN=MED37E PE=1 SV=3}	{mdm:103434172; K03283 HSPA1_8 heat shock 70kDa protein 1/8 - ko03040; Genetic Information Processing; Transcription; Spliceosome | ko04141; Genetic Information Processing; Folding, sorting and degradation; Protein processing in endoplasmic reticulum | ko04010; Environmental Information Processing; Signal transduction; MAPK signaling pathway | ko04144; Cellular Processes; Transport and catabolism…	{At5g02500; KOG0101 Molecular chaperones HSP70/HSC70, HSP70 superfamily O Posttranslational modification, protein turnover, chaperones ;}	{GO:0005975; carbohydrate metabolic process; biological_process GO:0016787; hydrolase activity; molecular_function GO:0000902; cell morphogenesis; biological_process GO:0016773; phosphotransferase activity, alcohol group as acceptor; molecular_function}	{KX940912.1; Spinacia oleracea Heat shock protein 70 (HSP70-14) mRNA, complete cds}	{PF01968:Hydantoinase/oxoprolinase PF02782:FGGY family of carbohydrate kinases, C-terminal domain PF06723:MreB/Mbl protein}
transcript_HQ_SAB_transcript8389/f2p0/2478	Inf	0.0032164	0.0068483	{JAT56419.1; Heat shock protein 83 [Anthurium amnicola]}	{sp|P40292|HSP90_ASPFU; Heat shock protein 90 OS=Neosartorya fumigata (strain ATCC MYA-4609 / Af293 / CBS 101355 / FGSC A1100) GN=hsp90 PE=1 SV=3}	{cre:CHLREDRAFT_138117; K04079 HSP90A, htpG molecular chaperone HtpG - ko04141; Genetic Information Processing; Folding, sorting and degradation; Protein processing in endoplasmic reticulum | ko04151; Environmental Information Processing; Signal transduction; PI3K-Akt signaling pathway | ko04621; Organismal Systems; Immune system; NOD-like receptor signaling pathway | ko04612; Organismal Systems;…	{YMR186w; KOG0019 Molecular chaperone (HSP90 family) O Posttranslational modification, protein turnover, chaperones ;}	{GO:0006457; protein folding; biological_process GO:0005524; ATP binding; molecular_function GO:0006950; response to stress; biological_process GO:0051082; unfolded protein binding; molecular_function}	{AK109111.1; Oryza sativa Japonica Group cDNA clone:002-155-C02, full insert sequence}	{PF00183:Hsp90 protein}
transcript_HQ_SAB_transcript7775/f3p0/2509	1.1454	1.9736e-06	6.1566e-06	{XP_010683054.1; PREDICTED: heat shock 70 kDa protein, mitochondrial-like [Beta vulgaris subsp. vulgaris]}	{sp|Q01899|HSP7M_PHAVU; Heat shock 70 kDa protein, mitochondrial OS=Phaseolus vulgaris PE=2 SV=1}	{jcu:105636020; K03283 HSPA1_8 heat shock 70kDa protein 1/8 - ko03040; Genetic Information Processing; Transcription; Spliceosome | ko04141; Genetic Information Processing; Folding, sorting and degradation; Protein processing in endoplasmic reticulum | ko04010; Environmental Information Processing; Signal transduction; MAPK signaling pathway | ko04144; Cellular Processes; Transport and catabolism…	{At5g09590; KOG0102 Molecular chaperones mortalin/PBP74/GRP75, HSP70 superfamily O Posttranslational modification, protein turnover, chaperones ;}	{GO:0016773; phosphotransferase activity, alcohol group as acceptor; molecular_function GO:0005975; carbohydrate metabolic process; biological_process GO:0000902; cell morphogenesis; biological_process GO:0005525; GTP binding; molecular_function}	{XM_010684752.2; PREDICTED: Beta vulgaris subsp. vulgaris heat shock 70 kDa protein, mitochondrial-like (LOC104897806), mRNA}	{PF02782:FGGY family of carbohydrate kinases, C-terminal domain PF06723:MreB/Mbl protein PF01031:Dynamin central region}
transcript_HQ_SAB_transcript7656/f5p0/2540	1.5802	9.8064e-08	3.424e-07	{XP_008644594.1; PREDICTED: stromal 70 kDa heat shock-related protein, chloroplastic-like [Zea mays]}	{sp|Q02028|HSP7S_PEA; Stromal 70 kDa heat shock-related protein, chloroplastic OS=Pisum sativum GN=HSP70 PE=2 SV=1}	{sita:101770657; K03283 HSPA1_8 heat shock 70kDa protein 1/8 - ko03040; Genetic Information Processing; Transcription; Spliceosome | ko04141; Genetic Information Processing; Folding, sorting and degradation; Protein processing in endoplasmic reticulum | ko04010; Environmental Information Processing; Signal transduction; MAPK signaling pathway | ko04144; Cellular Processes; Transport and catabolis…	{At4g24280; KOG0102 Molecular chaperones mortalin/PBP74/GRP75, HSP70 superfamily O Posttranslational modification, protein turnover, chaperones ;}	{GO:0000902; cell morphogenesis; biological_process GO:0016787; hydrolase activity; molecular_function GO:0005975; carbohydrate metabolic process; biological_process GO:0016773; phosphotransferase activity, alcohol group as acceptor; molecular_function}	{XM_015203492.1; PREDICTED: Solanum pennellii heat shock 70 kDa protein 7, chloroplastic-like (LOC107005034), mRNA}	{PF06723:MreB/Mbl protein PF02782:FGGY family of carbohydrate kinases, C-terminal domain PF01968:Hydantoinase/oxoprolinase}
transcript_HQ_SAB_transcript7559/f5p0/2557	-1.6831	1.6506e-40	1.9256e-39	{XP_010678704.1; PREDICTED: heat shock cognate 70 kDa protein-like [Beta vulgaris subsp. vulgaris]}	{sp|P09189|HSP7C_PETHY; Heat shock cognate 70 kDa protein OS=Petunia hybrida GN=HSP70 PE=2 SV=1}	{bvg:104894215; K03283 HSPA1_8 heat shock 70kDa protein 1/8 - ko03040; Genetic Information Processing; Transcription; Spliceosome | ko04141; Genetic Information Processing; Folding, sorting and degradation; Protein processing in endoplasmic reticulum | ko04010; Environmental Information Processing; Signal transduction; MAPK signaling pathway | ko04144; Cellular Processes; Transport and catabolism…	{At5g02500; KOG0101 Molecular chaperones HSP70/HSC70, HSP70 superfamily O Posttranslational modification, protein turnover, chaperones ;}	{GO:0051382; kinetochore assembly; biological_process GO:0000902; cell morphogenesis; biological_process GO:0006281; DNA repair; biological_process}	{XM_016331813.1; PREDICTED: Arachis ipaensis heat shock cognate 70 kDa protein 2 (LOC107629112), mRNA}	{PF06723:MreB/Mbl protein PF09415:CENP-S associating Centromere protein X}
transcript_HQ_SAB_transcript7435/f6p0/2556	0.34819	0.012595	0.024176	{XP_010691463.1; PREDICTED: heat shock 70 kDa protein, mitochondrial [Beta vulgaris subsp. vulgaris]}	{sp|Q01899|HSP7M_PHAVU; Heat shock 70 kDa protein, mitochondrial OS=Phaseolus vulgaris PE=2 SV=1}	{vvi:100248447; K03283 HSPA1_8 heat shock 70kDa protein 1/8 - ko03040; Genetic Information Processing; Transcription; Spliceosome | ko04141; Genetic Information Processing; Folding, sorting and degradation; Protein processing in endoplasmic reticulum | ko04010; Environmental Information Processing; Signal transduction; MAPK signaling pathway | ko04144; Cellular Processes; Transport and catabolism…	{At5g09590; KOG0102 Molecular chaperones mortalin/PBP74/GRP75, HSP70 superfamily O Posttranslational modification, protein turnover, chaperones ;}	{GO:0005525; GTP binding; molecular_function GO:0000902; cell morphogenesis; biological_process GO:0006357; regulation of transcription from RNA polymerase II promoter; biological_process GO:0005975; carbohydrate metabolic process; biological_process GO:0016592; mediator complex; cellular_component GO:0016773; phosphotransferase activity, alcohol group as acceptor; molecular_function GO:0001104; …	{XM_010693161.2; PREDICTED: Beta vulgaris subsp. vulgaris heat shock 70 kDa protein, mitochondrial (LOC104904782), mRNA}	{PF01031:Dynamin central region PF02782:FGGY family of carbohydrate kinases, C-terminal domain PF10018:Vitamin-D-receptor interacting Mediator subunit 4 PF06723:MreB/Mbl protein}
transcript_HQ_SAB_transcript7246/f10p0/2498	0.78468	1.3531e-05	3.8896e-05	{KJB22185.1; hypothetical protein B456_004G034000 [Gossypium raimondii]}	{sp|P36182|HSP82_TOBAC; Heat shock protein 82 (Fragment) OS=Nicotiana tabacum GN=HSP82 PE=2 SV=1}	{cic:CICLE_v10019095mg; K04079 HSP90A, htpG molecular chaperone HtpG - ko04141; Genetic Information Processing; Folding, sorting and degradation; Protein processing in endoplasmic reticulum | ko04151; Environmental Information Processing; Signal transduction; PI3K-Akt signaling pathway | ko04621; Organismal Systems; Immune system; NOD-like receptor signaling pathway | ko04612; Organismal Systems;…	{At5g52640; KOG0019 Molecular chaperone (HSP90 family) O Posttranslational modification, protein turnover, chaperones ;}	{GO:0005524; ATP binding; molecular_function GO:0006457; protein folding; biological_process GO:0006950; response to stress; biological_process GO:0051082; unfolded protein binding; molecular_function}	{XM_004516815.2; PREDICTED: Cicer arietinum Heat shock protein 83 (LOC101511551), mRNA}	{PF00183:Hsp90 protein}
transcript_HQ_SAB_transcript5528/f3p0/2814	0.71629	9.7984e-20	6.3797e-19	{XP_010681165.1; PREDICTED: Heat shock protein 90-5, chloroplastic isoform X2 [Beta vulgaris subsp. vulgaris]}	{sp|Q9SIF2|HS905_ARATH; Heat shock protein 90-5, chloroplastic OS=Arabidopsis thaliana GN=HSP90-5 PE=1 SV=1}	{nnu:104600243; K09487 HSP90B, TRA1 Heat shock protein 90kDa beta - ko04141; Genetic Information Processing; Folding, sorting and degradation; Protein processing in endoplasmic reticulum | ko04151; Environmental Information Processing; Signal transduction; PI3K-Akt signaling pathway | ko04657; Organismal Systems; Immune system; IL-17 signaling pathway | ko04915; Organismal Systems; Endocrine syst…	{At2g04030; KOG0019 Molecular chaperone (HSP90 family) O Posttranslational modification, protein turnover, chaperones ;}	{GO:0051082; unfolded protein binding; molecular_function GO:0006950; response to stress; biological_process GO:0006457; protein folding; biological_process GO:0005524; ATP binding; molecular_function}	{XM_010682862.2; PREDICTED: Beta vulgaris subsp. vulgaris Heat shock protein 90-5, chloroplastic (LOC104896153), transcript variant X1, mRNA}	{PF00183:Hsp90 protein}
transcript_HQ_SAB_transcript5132/f2p0/2859	Inf	1.2512e-05	3.6115e-05	{BAJ93696.1; predicted protein [Hordeum vulgare subsp. vulgare]}	{sp|P29844|HSP7C_DROME; Heat shock 70 kDa protein cognate 3 OS=Drosophila melanogaster GN=Hsc70-3 PE=2 SV=2}	{mpp:MICPUCDRAFT_70270; K09490 HSPA5, BIP heat shock 70kDa protein 5 - ko03060; Genetic Information Processing; Folding, sorting and degradation; Protein export | ko04141; Genetic Information Processing; Folding, sorting and degradation; Protein processing in endoplasmic reticulum | ko04918; Organismal Systems; Endocrine system; Thyroid hormone synthesis | ko05020; Human Diseases; Neurodegenerati…	{7292698; KOG0100 Molecular chaperones GRP78/BiP/KAR2, HSP70 superfamily O Posttranslational modification, protein turnover, chaperones ;}	{GO:0016773; phosphotransferase activity, alcohol group as acceptor; molecular_function GO:0000902; cell morphogenesis; biological_process GO:0016787; hydrolase activity; molecular_function GO:0005975; carbohydrate metabolic process; biological_process}	{AK362492.1; Hordeum vulgare subsp. vulgare mRNA for predicted protein, complete cds, clone: NIASHv2006B10}	{PF01968:Hydantoinase/oxoprolinase PF02782:FGGY family of carbohydrate kinases, C-terminal domain PF06723:MreB/Mbl protein}
transcript_HQ_SAB_transcript5082/f3p0/2881	0.30462	3.7454e-08	1.3442e-07	{XP_010691883.1; PREDICTED: endoplasmin homolog [Beta vulgaris subsp. vulgaris]}	{sp|Q9STX5|ENPL_ARATH; Endoplasmin homolog OS=Arabidopsis thaliana GN=HSP90-7 PE=1 SV=1}	{cit:102608412; K09487 HSP90B, TRA1 Heat shock protein 90kDa beta - ko04141; Genetic Information Processing; Folding, sorting and degradation; Protein processing in endoplasmic reticulum | ko04151; Environmental Information Processing; Signal transduction; PI3K-Akt signaling pathway | ko04657; Organismal Systems; Immune system; IL-17 signaling pathway | ko04915; Organismal Systems; Endocrine syst…	{At4g24190; KOG0020 Endoplasmic reticulum glucose-regulated protein (GRP94/endoplasmin), HSP90 family O Posttranslational modification, protein turnover, chaperones ;}	{GO:0005524; ATP binding; molecular_function GO:0006457; protein folding; biological_process GO:0051082; unfolded protein binding; molecular_function GO:0006950; response to stress; biological_process}	{XM_010693581.2; PREDICTED: Beta vulgaris subsp. vulgaris endoplasmin homolog (LOC104905131), mRNA}	{PF00183:Hsp90 protein}
transcript_HQ_SAB_transcript4489/f2p0/2966	0.9644	1.8057e-46	2.3667e-45	{KNA11575.1; hypothetical protein SOVF_133880 [Spinacia oleracea]}	{sp|Q9S7C0|HSP7O_ARATH; Heat shock 70 kDa protein 14 OS=Arabidopsis thaliana GN=HSP70-14 PE=2 SV=1}	{sot:102601134; K09489 HSPA4 heat shock 70kDa protein 4 - ko04530; Cellular Processes; Cellular community - eukaryotes; Tight junction | ko04612; Organismal Systems; Immune system; Antigen processing and presentation}	{At1g79930; KOG0103 Molecular chaperones HSP105/HSP110/SSE1, HSP70 superfamily O Posttranslational modification, protein turnover, chaperones ;}	{GO:0000902; cell morphogenesis; biological_process}	{XM_010692990.2; PREDICTED: Beta vulgaris subsp. vulgaris heat shock 70 kDa protein 15 (LOC104904660), mRNA}	{PF06723:MreB/Mbl protein}
transcript_HQ_SAB_transcript3799/f2p0/3105	Inf	0.00059744	0.0014127	{BAJ89237.1; predicted protein [Hordeum vulgare subsp. vulgare]}	{sp|Q95M18|ENPL_BOVIN; Endoplasmin OS=Bos taurus GN=HSP90B1 PE=2 SV=1}	{jcu:105635326; K09487 HSP90B, TRA1 Heat shock protein 90kDa beta - ko04141; Genetic Information Processing; Folding, sorting and degradation; Protein processing in endoplasmic reticulum | ko04151; Environmental Information Processing; Signal transduction; PI3K-Akt signaling pathway | ko04657; Organismal Systems; Immune system; IL-17 signaling pathway | ko04915; Organismal Systems; Endocrine syst…	{7301648; KOG0020 Endoplasmic reticulum glucose-regulated protein (GRP94/endoplasmin), HSP90 family O Posttranslational modification, protein turnover, chaperones ;}	{GO:0006457; protein folding; biological_process GO:0005524; ATP binding; molecular_function GO:0051082; unfolded protein binding; molecular_function GO:0006950; response to stress; biological_process}	{XM_017371027.1; PREDICTED: Daucus carota subsp. sativus Heat shock protein 90-5, chloroplastic (LOC108202568), mRNA}	{PF00183:Hsp90 protein}
transcript_HQ_SAB_transcript3704/f10p0/3117	-1.5272	2.307e-38	2.5479e-37	{XP_015058100.1; PREDICTED: heat shock cognate 70 kDa protein 2-like [Solanum pennellii]}	{sp|P27322|HSP72_SOLLC; Heat shock cognate 70 kDa protein 2 OS=Solanum lycopersicum GN=HSC-2 PE=2 SV=1}	{nta:107768506; - - - - -}	{At5g02500; KOG0101 Molecular chaperones HSP70/HSC70, HSP70 superfamily O Posttranslational modification, protein turnover, chaperones ;}	{GO:0016773; phosphotransferase activity, alcohol group as acceptor; molecular_function GO:0016787; hydrolase activity; molecular_function GO:0005975; carbohydrate metabolic process; biological_process GO:0000902; cell morphogenesis; biological_process GO:0030436; asexual sporulation; biological_process}	{AF034617.1; Spinacia oleracea cytosolic heat shock 70 protein (HSC70-3alpha) gene, complete cds}	{PF02782:FGGY family of carbohydrate kinases, C-terminal domain PF06723:MreB/Mbl protein PF01968:Hydantoinase/oxoprolinase PF14098:Small, acid-soluble spore protein I}
transcript_HQ_SAB_transcript32056/f2p0/606	-0.79622	1.9271e-39	2.1866e-38	{XP_010673239.1; PREDICTED: abscisic stress-ripening protein 1 [Beta vulgaris subsp. vulgaris]}	{sp|P37219|ASR2_SOLLC; Abscisic stress-ripening protein 2 OS=Solanum lycopersicum GN=ASR2 PE=4 SV=1}	{bvg:104889661; - - - - -}	{NA}	{GO:0006950; response to stress; biological_process GO:0070469; respiratory chain; cellular_component GO:0022900; electron transport chain; biological_process GO:0005743; mitochondrial inner membrane; cellular_component}	{XM_010674937.2; PREDICTED: Beta vulgaris subsp. vulgaris abscisic stress-ripening protein 1 (LOC104889661), mRNA}	{PF02496:ABA/WDS induced protein PF10890:Protein of unknown function (DUF2741)}
transcript_HQ_SAB_transcript31984/f2p0/633	-0.21254	0.0072844	0.014645	{NA}	{NA}	{NA}	{NA}	{GO:0006950; response to stress; biological_process GO:0009306; protein secretion; biological_process}	{XM_010674937.2; PREDICTED: Beta vulgaris subsp. vulgaris abscisic stress-ripening protein 1 (LOC104889661), mRNA}	{PF02496:ABA/WDS induced protein PF11654:Protein of unknown function (DUF2665)}
transcript_HQ_SAB_transcript31800/f43p0/552	-0.41159	1.5799e-35	1.6363e-34	{XP_010673239.1; PREDICTED: abscisic stress-ripening protein 1 [Beta vulgaris subsp. vulgaris]}	{sp|Q08655|ASR1_SOLLC; Abscisic stress-ripening protein 1 OS=Solanum lycopersicum GN=ASR1 PE=2 SV=1}	{bvg:104889661; - - - - -}	{NA}	{GO:0006950; response to stress; biological_process}	{XM_010674937.2; PREDICTED: Beta vulgaris subsp. vulgaris abscisic stress-ripening protein 1 (LOC104889661), mRNA}	{PF02496:ABA/WDS induced protein}
transcript_HQ_SAB_transcript31707/f2p0/671	-0.14698	0.0026966	0.0058048	{XP_010673227.1; PREDICTED: abscisic stress-ripening protein 1 [Beta vulgaris subsp. vulgaris]}	{sp|P37219|ASR2_SOLLC; Abscisic stress-ripening protein 2 OS=Solanum lycopersicum GN=ASR2 PE=4 SV=1}	{bvg:104889652; - - - - -}	{NA}	{GO:0009306; protein secretion; biological_process GO:0008121; ubiquinol-cytochrome-c reductase activity; molecular_function GO:0006950; response to stress; biological_process GO:0055114; oxidation-reduction process; biological_process}	{XM_010674937.2; PREDICTED: Beta vulgaris subsp. vulgaris abscisic stress-ripening protein 1 (LOC104889661), mRNA}	{PF02496:ABA/WDS induced protein PF11654:Protein of unknown function (DUF2665) PF02921:Ubiquinol cytochrome reductase transmembrane region}
transcript_HQ_SAB_transcript31499/f3p0/703	-0.65959	0.006982	0.014075	{BAM64831.1; hypothetical protein [Beta vulgaris]}	{NA}	{bvg:104888047; - - - - -}	{NA}	{GO:0006950; response to stress; biological_process}	{NA}	{PF03242:Late embryogenesis abundant protein}
transcript_HQ_SAB_transcript31299/f6p0/732	7.7062	0	0	{BAM64831.1; hypothetical protein [Beta vulgaris]}	{NA}	{bvg:104888047; - - - - -}	{NA}	{GO:0006950; response to stress; biological_process}	{NA}	{PF03242:Late embryogenesis abundant protein}
transcript_HQ_SAB_transcript31265/f6p0/727	-0.51617	7.2476e-07	2.3486e-06	{XP_010671617.1; PREDICTED: heavy metal-associated isoprenylated plant protein 39 [Beta vulgaris subsp. vulgaris]}	{sp|O03982|HIP39_ARATH; Heavy metal-associated isoprenylated plant protein 39 OS=Arabidopsis thaliana GN=HIPP39 PE=2 SV=1}	{bvg:104888366; - - - - -}	{At1g01490; KOG1603 Copper chaperone P Inorganic ion transport and metabolism ;}	{GO:0006950; response to stress; biological_process GO:0046872; metal ion binding; molecular_function GO:0030001; metal ion transport; biological_process}	{XM_010673315.2; PREDICTED: Beta vulgaris subsp. vulgaris hypothetical protein (LOC104888366), mRNA}	{PF03242:Late embryogenesis abundant protein PF00403:Heavy-metal-associated domain}
transcript_HQ_SAB_transcript30839/f2p0/793	-0.46006	1.8469e-11	8.2271e-11	{AEZ67462.1; late embryogenesis abundant proteins, partial [Haloxylon ammodendron]}	{sp|Q39644|LEA5_CITSI; Late embryogenesis abundant protein Lea5 OS=Citrus sinensis GN=LEA5 PE=2 SV=1}	{nnu:104598918; - - - - -}	{NA}	{GO:0006950; response to stress; biological_process}	{JQ277729.1; Haloxylon ammodendron late embryogenesis abundant proteins (LEA3) mRNA, partial cds}	{PF03242:Late embryogenesis abundant protein}
transcript_HQ_SAB_transcript29992/f3p0/870	#NAME?	0.0093724	0.018446	{XP_010671625.1; PREDICTED: Heat shock protein 83 [Beta vulgaris subsp. vulgaris]}	{sp|P51819|HSP83_IPONI; Heat shock protein 83 OS=Ipomoea nil GN=HSP83A PE=2 SV=1}	{bvg:104888372; K04079 HSP90A, htpG molecular chaperone HtpG - ko04141; Genetic Information Processing; Folding, sorting and degradation; Protein processing in endoplasmic reticulum | ko04151; Environmental Information Processing; Signal transduction; PI3K-Akt signaling pathway | ko04621; Organismal Systems; Immune system; NOD-like receptor signaling pathway | ko04612; Organismal Systems; Immune …	{At5g52640; KOG0019 Molecular chaperone (HSP90 family) O Posttranslational modification, protein turnover, chaperones ;}	{GO:0006457; protein folding; biological_process GO:0005524; ATP binding; molecular_function GO:0006950; response to stress; biological_process GO:0051082; unfolded protein binding; molecular_function}	{XM_010673323.2; PREDICTED: Beta vulgaris subsp. vulgaris Heat shock protein 83 (LOC104888372), mRNA}	{PF00183:Hsp90 protein}
transcript_HQ_SAB_transcript29877/f5p0/887	1.2152	0.027224	0.04887	{XP_010669352.1; PREDICTED: 17.1 kDa class II Heat shock protein [Beta vulgaris subsp. vulgaris]}	{sp|P05477|HSP21_SOYBN; 17.9 kDa class II Heat shock protein OS=Glycine max GN=HSP17.9-D PE=3 SV=1}	{bvg:104886590; K13993 HSP20 HSP20 family protein - ko04141; Genetic Information Processing; Folding, sorting and degradation; Protein processing in endoplasmic reticulum}	{At5g12020; KOG0710 Molecular chaperone (small heat-shock protein Hsp26/Hsp42) O Posttranslational modification, protein turnover, chaperones ;}	{GO:0004252; serine-type endopeptidase activity; molecular_function GO:0016032; NA GO:0019082; viral protein processing; biological_process}	{XM_011021081.1; PREDICTED: Populus euphratica 17.9 kDa class II Heat shock protein-like (LOC105122151), mRNA}	{PF05579:Equine arteritis virus serine endopeptidase S32}
transcript_HQ_SAB_transcript28872/f2p0/988	2.1011	2.1739e-09	8.4835e-09	{AGZ20206.1; abscisic acid stress ripening-related protein [Suaeda liaotungensis]}	{sp|Q08655|ASR1_SOLLC; Abscisic stress-ripening protein 1 OS=Solanum lycopersicum GN=ASR1 PE=2 SV=1}	{bvg:104895943; - - - - -}	{NA}	{GO:0006950; response to stress; biological_process}	{KC460335.1; Suaeda liaotungensis abscisic acid stress ripening-related protein (ASR) mRNA, complete cds}	{PF02496:ABA/WDS induced protein}
transcript_HQ_SAB_transcript28179/f2p0/1045	-1.3641	3.1895e-130	1.1781e-128	{AGZ20206.1; abscisic acid stress ripening-related protein [Suaeda liaotungensis]}	{sp|Q08655|ASR1_SOLLC; Abscisic stress-ripening protein 1 OS=Solanum lycopersicum GN=ASR1 PE=2 SV=1}	{bvg:104895943; - - - - -}	{NA}	{GO:0003677; DNA binding; molecular_function GO:0008270; zinc ion binding; molecular_function GO:0006950; response to stress; biological_process}	{KC460335.1; Suaeda liaotungensis abscisic acid stress ripening-related protein (ASR) mRNA, complete cds}	{PF02496:ABA/WDS induced protein PF01754:A20-like zinc finger}
transcript_HQ_SAB_transcript27712/f11p0/1052	1.2871	1.9776e-232	1.4712e-230	{AGZ20206.1; abscisic acid stress ripening-related protein [Suaeda liaotungensis]}	{sp|Q08655|ASR1_SOLLC; Abscisic stress-ripening protein 1 OS=Solanum lycopersicum GN=ASR1 PE=2 SV=1}	{bvg:104895943; - - - - -}	{NA}	{GO:0006950; response to stress; biological_process}	{KC460335.1; Suaeda liaotungensis abscisic acid stress ripening-related protein (ASR) mRNA, complete cds}	{PF02496:ABA/WDS induced protein}
transcript_HQ_SAB_transcript27643/f4p0/1085	1.6145	9.9348e-135	3.8303e-133	{KNA22961.1; hypothetical protein SOVF_029150 [Spinacia oleracea]}	{sp|Q41951|TIP21_ARATH; Aquaporin TIP2-1 OS=Arabidopsis thaliana GN=TIP2-1 PE=1 SV=2}	{cit:102624065; K09873 TIP Aquaporin TIP - -}	{At3g16240; KOG0223 Aquaporin (major intrinsic protein family) G Carbohydrate transport and metabolism ;}	{GO:0016020; membrane; cellular_component GO:0006810; transport; biological_process GO:0005215; NA}	{AJ245953.1; Spinacia oleracea mRNA for delta tonoplast intrinsic protein (dtip gene)}	{PF00230:Major intrinsic protein}
transcript_HQ_SAB_transcript26859/f6p0/1138	-0.36996	0.0024539	0.0053173	{XP_010691990.1; PREDICTED: late embryogenesis abundant protein D-29 isoform X1 [Beta vulgaris subsp. vulgaris]}	{sp|P13940|LEA29_GOSHI; Late embryogenesis abundant protein D-29 OS=Gossypium hirsutum PE=3 SV=1}	{nta:107771277; - - - - -}	{NA}	{GO:0015743; malate transport; biological_process GO:0008289; lipid binding; molecular_function GO:0006260; DNA replication; biological_process GO:0042157; lipoprotein metabolic process; biological_process GO:0005576; NA GO:0005634; nucleus; cellular_component GO:0006869; lipid transport; biological_process}	{NA}	{PF01442:Apolipoprotein A1/A4/E domain PF09507:DNA polymerase subunit Cdc27 PF11744:Aluminium activated malate transporter}
transcript_HQ_SAB_transcript26825/f2p0/1152	0.74512	1.5542e-08	5.7296e-08	{KNA08168.1; hypothetical protein SOVF_165100 [Spinacia oleracea]}	{sp|P19243|HSP11_PEA; 18.1 kDa class I Heat shock protein OS=Pisum sativum GN=HSP18.1 PE=1 SV=1}	{vra:106765882; K13993 HSP20 HSP20 family protein - ko04141; Genetic Information Processing; Folding, sorting and degradation; Protein processing in endoplasmic reticulum}	{At3g46230; KOG0710 Molecular chaperone (small heat-shock protein Hsp26/Hsp42) O Posttranslational modification, protein turnover, chaperones ;}	{NA}	{NA}	{NA}
transcript_HQ_SAB_transcript26811/f4p0/1118	-0.52744	1.7981e-18	1.1128e-17	{XP_010680967.1; PREDICTED: abscisic stress-ripening protein 2 [Beta vulgaris subsp. vulgaris]}	{sp|Q08655|ASR1_SOLLC; Abscisic stress-ripening protein 1 OS=Solanum lycopersicum GN=ASR1 PE=2 SV=1}	{bvg:104895999; - - - - -}	{NA}	{GO:0006950; response to stress; biological_process}	{XM_007201237.1; Prunus persica hypothetical protein (PRUPE_ppa011853mg) mRNA, complete cds}	{PF02496:ABA/WDS induced protein}
transcript_HQ_SAB_transcript26527/f2p0/1179	2.2421	0.0015663	0.003489	{AEZ67462.1; late embryogenesis abundant proteins, partial [Haloxylon ammodendron]}	{sp|Q39644|LEA5_CITSI; Late embryogenesis abundant protein Lea5 OS=Citrus sinensis GN=LEA5 PE=2 SV=1}	{crb:CARUB_v10006078mg; - - - - -}	{NA}	{GO:0006950; response to stress; biological_process}	{JQ277729.1; Haloxylon ammodendron late embryogenesis abundant proteins (LEA3) mRNA, partial cds}	{PF03242:Late embryogenesis abundant protein}
transcript_HQ_SAB_transcript26356/f14p0/1186	-1.3224	1.9829e-179	1.066e-177	{XP_010680902.1; PREDICTED: glycine-rich cell wall structural protein 1.8 [Beta vulgaris subsp. vulgaris]}	{sp|P37219|ASR2_SOLLC; Abscisic stress-ripening protein 2 OS=Solanum lycopersicum GN=ASR2 PE=4 SV=1}	{bvg:104895948; - - - - -}	{NA}	{GO:0006950; response to stress; biological_process}	{XM_010682600.2; PREDICTED: Beta vulgaris subsp. vulgaris glycine-rich cell wall structural protein 1.8 (LOC104895948), mRNA}	{PF02496:ABA/WDS induced protein}
transcript_HQ_SAB_transcript26115/f2p0/1211	0.60796	3.2714e-14	1.6841e-13	{BAI94500.1; plasma membrane intrinsic protein [Dianthus caryophyllus]}	{sp|Q08733|PIP13_ARATH; Aquaporin PIP1-3 OS=Arabidopsis thaliana GN=PIP1-3 PE=1 SV=1}	{ath:AT1G01620; K09872 PIP Aquaporin PIP - -}	{At1g01620; KOG0223 Aquaporin (major intrinsic protein family) G Carbohydrate transport and metabolism ;}	{GO:0005215; NA GO:0006810; transport; biological_process GO:0016020; membrane; cellular_component}	{AJ699398.2; Chenopodium rubrum mRNA for Aquaporin PIP1 (PIP1 gene)}	{PF00230:Major intrinsic protein}
transcript_HQ_SAB_transcript26064/f18p0/1165	Inf	3.2263e-28	2.7441e-27	{XP_010680902.1; PREDICTED: glycine-rich cell wall structural protein 1.8 [Beta vulgaris subsp. vulgaris]}	{sp|P37220|ASR3_SOLLC; Abscisic stress-ripening protein 3 OS=Solanum lycopersicum GN=ASR3 PE=4 SV=2}	{bvg:104895948; - - - - -}	{NA}	{GO:0006950; response to stress; biological_process}	{XM_010682600.2; PREDICTED: Beta vulgaris subsp. vulgaris glycine-rich cell wall structural protein 1.8 (LOC104895948), mRNA}	{PF02496:ABA/WDS induced protein}
transcript_HQ_SAB_transcript26062/f6p0/1213	0.58047	0.024425	0.044265	{AJK93570.1; tonoplast intrinsic protein [Suaeda glauca]}	{sp|P50156|TIP11_ORYSJ; Probable Aquaporin TIP1-1 OS=Oryza sativa subsp. japonica GN=TIP1-1 PE=2 SV=1}	{nnu:104594630; K09873 TIP Aquaporin TIP - -}	{At4g01470; KOG0223 Aquaporin (major intrinsic protein family) G Carbohydrate transport and metabolism ;}	{GO:0016020; membrane; cellular_component GO:0005215; NA GO:0006810; transport; biological_process}	{KP006434.1; Suaeda glauca tonoplast intrinsic protein mRNA, complete cds}	{PF00230:Major intrinsic protein}
transcript_HQ_SAB_transcript25837/f4p0/1227	0.76519	2.1095e-05	5.9433e-05	{XP_010691608.1; PREDICTED: Aquaporin NIP6-1 [Beta vulgaris subsp. vulgaris]}	{sp|Q9SAI4|NIP61_ARATH; Aquaporin NIP6-1 OS=Arabidopsis thaliana GN=NIP6-1 PE=1 SV=1}	{cit:102629705; K09874 NIP Aquaporin NIP - -}	{At1g80760; KOG0223 Aquaporin (major intrinsic protein family) G Carbohydrate transport and metabolism ;}	{GO:0006810; transport; biological_process GO:0005215; NA GO:0016020; membrane; cellular_component}	{XM_010693306.2; PREDICTED: Beta vulgaris subsp. vulgaris Aquaporin NIP6-1 (LOC104904889), mRNA}	{PF00230:Major intrinsic protein}
transcript_HQ_SAB_transcript25505/f3p0/1266	1.2689	0.0010157	0.002326	{ABE03629.1; plasma membrane major intrinsic protein [Salicornia bigelovii]}	{sp|Q39196|PIP14_ARATH; Probable Aquaporin PIP1-4 OS=Arabidopsis thaliana GN=PIP1.4 PE=1 SV=1}	{sot:102598096; K09872 PIP Aquaporin PIP - -}	{At1g01620; KOG0223 Aquaporin (major intrinsic protein family) G Carbohydrate transport and metabolism ;}	{GO:0006810; transport; biological_process GO:0005215; NA GO:0016020; membrane; cellular_component}	{DQ451602.1; Salicornia bigelovii plasma membrane major intrinsic protein (PIP1) mRNA, complete cds}	{PF00230:Major intrinsic protein}
transcript_HQ_SAB_transcript25501/f2p0/1263	0.96775	3.2733e-31	3.0293e-30	{AEY75254.1; Aquaporin [Atriplex canescens]}	{sp|P42767|PIP1_ATRCA; Aquaporin PIP-type OS=Atriplex canescens PE=2 SV=1}	{thj:104804325; K09872 PIP Aquaporin PIP - -}	{At4g35100; KOG0223 Aquaporin (major intrinsic protein family) G Carbohydrate transport and metabolism ;}	{GO:0005215; NA GO:0006810; transport; biological_process GO:0016020; membrane; cellular_component}	{U18403.1; Atriplex canescens Aquaporin mRNA, complete cds}	{PF00230:Major intrinsic protein}
transcript_HQ_SAB_transcript25465/f5p0/1255	-3.0721	1.3153e-05	3.785e-05	{ABE03629.1; plasma membrane major intrinsic protein [Salicornia bigelovii]}	{sp|Q39196|PIP14_ARATH; Probable Aquaporin PIP1-4 OS=Arabidopsis thaliana GN=PIP1.4 PE=1 SV=1}	{sot:102598096; K09872 PIP Aquaporin PIP - -}	{At1g01620; KOG0223 Aquaporin (major intrinsic protein family) G Carbohydrate transport and metabolism ;}	{GO:0016020; membrane; cellular_component GO:0006810; transport; biological_process GO:0005215; NA}	{DQ451602.1; Salicornia bigelovii plasma membrane major intrinsic protein (PIP1) mRNA, complete cds}	{PF00230:Major intrinsic protein}
transcript_HQ_SAB_transcript25207/f2p0/1286	0.94146	2.3032e-07	7.7883e-07	{AEZ67462.1; late embryogenesis abundant proteins, partial [Haloxylon ammodendron]}	{sp|Q39644|LEA5_CITSI; Late embryogenesis abundant protein Lea5 OS=Citrus sinensis GN=LEA5 PE=2 SV=1}	{nnu:104598918; - - - - -}	{NA}	{GO:0006950; response to stress; biological_process}	{JQ277729.1; Haloxylon ammodendron late embryogenesis abundant proteins (LEA3) mRNA, partial cds}	{PF03242:Late embryogenesis abundant protein}
transcript_HQ_SAB_transcript24991/f2p0/1300	2.6487	9.5606e-13	4.5908e-12	{AEZ67462.1; late embryogenesis abundant proteins, partial [Haloxylon ammodendron]}	{sp|Q39644|LEA5_CITSI; Late embryogenesis abundant protein Lea5 OS=Citrus sinensis GN=LEA5 PE=2 SV=1}	{nnu:104598918; - - - - -}	{NA}	{GO:0006950; response to stress; biological_process}	{JQ277729.1; Haloxylon ammodendron late embryogenesis abundant proteins (LEA3) mRNA, partial cds}	{PF03242:Late embryogenesis abundant protein}
transcript_HQ_SAB_transcript24804/f4p0/1254	-0.87856	2.5308e-09	9.8348e-09	{XP_010680902.1; PREDICTED: glycine-rich cell wall structural protein 1.8 [Beta vulgaris subsp. vulgaris]}	{sp|Q08655|ASR1_SOLLC; Abscisic stress-ripening protein 1 OS=Solanum lycopersicum GN=ASR1 PE=2 SV=1}	{bvg:104895948; - - - - -}	{NA}	{GO:0006950; response to stress; biological_process}	{KC460335.1; Suaeda liaotungensis abscisic acid stress ripening-related protein (ASR) mRNA, complete cds}	{PF02496:ABA/WDS induced protein}
transcript_HQ_SAB_transcript24491/f3p0/1319	1.2431	3.5794e-12	1.661e-11	{AEY75254.1; Aquaporin [Atriplex canescens]}	{sp|P42767|PIP1_ATRCA; Aquaporin PIP-type OS=Atriplex canescens PE=2 SV=1}	{thj:104804325; K09872 PIP Aquaporin PIP - -}	{At4g35100; KOG0223 Aquaporin (major intrinsic protein family) G Carbohydrate transport and metabolism ;}	{GO:0005215; NA GO:0006810; transport; biological_process GO:0016020; membrane; cellular_component}	{U18403.1; Atriplex canescens Aquaporin mRNA, complete cds}	{PF00230:Major intrinsic protein}
transcript_HQ_SAB_transcript24416/f2p0/1353	1.0385	0.00019068	0.0004788	{XP_010665679.1; PREDICTED: Aquaporin NIP1-1 isoform X1 [Beta vulgaris subsp. vulgaris]}	{sp|Q8LFP7|NIP12_ARATH; Aquaporin NIP1-2 OS=Arabidopsis thaliana GN=NIP1-2 PE=2 SV=2}	{vvi:100263543; K09874 NIP Aquaporin NIP - -}	{At4g18910; KOG0223 Aquaporin (major intrinsic protein family) G Carbohydrate transport and metabolism ;}	{GO:0016020; membrane; cellular_component GO:0005215; NA GO:0006810; transport; biological_process}	{XM_006358022.2; PREDICTED: Solanum tuberosum Aquaporin NIP1-1-like (LOC102591600), mRNA}	{PF00230:Major intrinsic protein}
transcript_HQ_SAB_transcript24211/f6p0/1343	0.79396	4.267e-35	4.3806e-34	{KMT02066.1; hypothetical protein BVRB_9g207950 [Beta vulgaris subsp. vulgaris]}	{sp|Q9ATM4|PIP27_MAIZE; Aquaporin PIP2-7 OS=Zea mays GN=PIP2-7 PE=2 SV=1}	{rcu:8264070; K09872 PIP Aquaporin PIP - -}	{At3g53420; KOG0223 Aquaporin (major intrinsic protein family) G Carbohydrate transport and metabolism ;}	{GO:0006810; transport; biological_process GO:0005215; NA GO:0016020; membrane; cellular_component}	{U60147.1; Beta vulgaris plasma membrane major intrinsic protein 1 mRNA, complete cds}	{PF00230:Major intrinsic protein}
transcript_HQ_SAB_transcript23952/f4p0/1361	0.29959	0.0019029	0.0041868	{XP_010679062.1; PREDICTED: late embryogenesis abundant protein 31 [Beta vulgaris subsp. vulgaris]}	{sp|P09444|LEA34_GOSHI; Late embryogenesis abundant protein D-34 OS=Gossypium hirsutum PE=3 SV=1}	{bvg:104894509; - - - - -}	{NA}	{NA}	{NA}	{NA}
transcript_HQ_SAB_transcript23702/f2p0/1401	-1.0583	2.25e-09	8.7708e-09	{XP_010684101.1; PREDICTED: Aquaporin PIP2-1 [Beta vulgaris subsp. vulgaris]}	{sp|P43286|PIP21_ARATH; Aquaporin PIP2-1 OS=Arabidopsis thaliana GN=PIP2-1 PE=1 SV=1}	{mdm:103450053; K09872 PIP Aquaporin PIP - -}	{At3g53420; KOG0223 Aquaporin (major intrinsic protein family) G Carbohydrate transport and metabolism ;}	{GO:0005215; NA GO:0006810; transport; biological_process GO:0016020; membrane; cellular_component}	{XM_010685799.2; PREDICTED: Beta vulgaris subsp. vulgaris Aquaporin PIP2-1 (LOC104898695), mRNA}	{PF00230:Major intrinsic protein}
transcript_HQ_SAB_transcript17423/f2p0/1780	Inf	5.5763e-05	0.00014967	{JAT56419.1; Heat shock protein 83 [Anthurium amnicola]}	{sp|Q9BLC5|HSP83_BOMMO; Heat shock protein 83 OS=Bombyx mori GN=Hsp83 PE=1 SV=1}	{cic:CICLE_v10019095mg; K04079 HSP90A, htpG molecular chaperone HtpG - ko04141; Genetic Information Processing; Folding, sorting and degradation; Protein processing in endoplasmic reticulum | ko04151; Environmental Information Processing; Signal transduction; PI3K-Akt signaling pathway | ko04621; Organismal Systems; Immune system; NOD-like receptor signaling pathway | ko04612; Organismal Systems;…	{7292327; KOG0019 Molecular chaperone (HSP90 family) O Posttranslational modification, protein turnover, chaperones ;}	{GO:0005789; endoplasmic reticulum membrane; cellular_component GO:0009236; cobalamin biosynthetic process; biological_process GO:0006457; protein folding; biological_process GO:0005524; ATP binding; molecular_function GO:0006950; response to stress; biological_process GO:0051082; unfolded protein binding; molecular_function}	{BT139921.1; Lotus japonicus clone JCVI-FLLj-24E9 unknown mRNA}	{PF03896:Translocon-associated protein (TRAP), alpha subunit PF00183:Hsp90 protein PF06213:Cobalamin biosynthesis protein CobT}
transcript_HQ_SAB_transcript16436/f12p0/1783	-1.8388	1.5593e-22	1.1164e-21	{XP_020085019.1; Heat shock protein 83-like [Ananas comosus]}	{sp|P36182|HSP82_TOBAC; Heat shock protein 82 (Fragment) OS=Nicotiana tabacum GN=HSP82 PE=2 SV=1}	{bvg:104888372; K04079 HSP90A, htpG molecular chaperone HtpG - ko04141; Genetic Information Processing; Folding, sorting and degradation; Protein processing in endoplasmic reticulum | ko04151; Environmental Information Processing; Signal transduction; PI3K-Akt signaling pathway | ko04621; Organismal Systems; Immune system; NOD-like receptor signaling pathway | ko04612; Organismal Systems; Immune …	{At5g52640; KOG0019 Molecular chaperone (HSP90 family) O Posttranslational modification, protein turnover, chaperones ;}	{GO:0006950; response to stress; biological_process GO:0051082; unfolded protein binding; molecular_function GO:0006457; protein folding; biological_process GO:0005524; ATP binding; molecular_function}	{XM_010673323.2; PREDICTED: Beta vulgaris subsp. vulgaris Heat shock protein 83 (LOC104888372), mRNA}	{PF00183:Hsp90 protein}
transcript_HQ_SAB_transcript11102/f2p0/2207	1.1944	0.0099538	0.019496	{KNA11497.1; hypothetical protein SOVF_134690 [Spinacia oleracea]}	{sp|Q9SKY8|HSP7H_ARATH; Heat shock 70 kDa protein 8 OS=Arabidopsis thaliana GN=HSP70-8 PE=1 SV=1}	{jcu:105631975; K09489 HSPA4 heat shock 70kDa protein 4 - ko04530; Cellular Processes; Cellular community - eukaryotes; Tight junction | ko04612; Organismal Systems; Immune system; Antigen processing and presentation}	{At2g32120; KOG0101 Molecular chaperones HSP70/HSC70, HSP70 superfamily O Posttranslational modification, protein turnover, chaperones ;}	{NA}	{XM_010668631.2; PREDICTED: Beta vulgaris subsp. vulgaris heat shock 70 kDa protein 8 (LOC104884040), mRNA}	{NA}
transcript_HQ_BAB_transcript9529/f3p0/2626	2.6823	0	0	{XP_004250958.1; PREDICTED: heat shock cognate 70 kDa protein 2-like [Solanum lycopersicum]}	{sp|P27322|HSP72_SOLLC; Heat shock cognate 70 kDa protein 2 OS=Solanum lycopersicum GN=HSC-2 PE=2 SV=1}	{nta:107768506; - - - - -}	{At5g02500; KOG0101 Molecular chaperones HSP70/HSC70, HSP70 superfamily O Posttranslational modification, protein turnover, chaperones ;}	{GO:0005975; carbohydrate metabolic process; biological_process GO:0000902; cell morphogenesis; biological_process GO:0016773; phosphotransferase activity, alcohol group as acceptor; molecular_function GO:0030436; asexual sporulation; biological_process GO:0016787; hydrolase activity; molecular_function}	{AF033852.1; Spinacia oleracea cytosolic heat shock 70 protein (HSC70) mRNA, complete cds}	{PF02782:FGGY family of carbohydrate kinases, C-terminal domain PF01968:Hydantoinase/oxoprolinase PF14098:Small, acid-soluble spore protein I PF06723:MreB/Mbl protein}
transcript_HQ_BAB_transcript7718/f4p0/2849	-0.7885	6.1211e-46	7.9293e-45	{XP_010681165.1; PREDICTED: Heat shock protein 90-5, chloroplastic isoform X2 [Beta vulgaris subsp. vulgaris]}	{sp|Q9SIF2|HS905_ARATH; Heat shock protein 90-5, chloroplastic OS=Arabidopsis thaliana GN=HSP90-5 PE=1 SV=1}	{nnu:104600243; K09487 HSP90B, TRA1 Heat shock protein 90kDa beta - ko04141; Genetic Information Processing; Folding, sorting and degradation; Protein processing in endoplasmic reticulum | ko04151; Environmental Information Processing; Signal transduction; PI3K-Akt signaling pathway | ko04657; Organismal Systems; Immune system; IL-17 signaling pathway | ko04915; Organismal Systems; Endocrine syst…	{At2g04030; KOG0019 Molecular chaperone (HSP90 family) O Posttranslational modification, protein turnover, chaperones ;}	{GO:0005524; ATP binding; molecular_function GO:0006950; response to stress; biological_process GO:0006457; protein folding; biological_process GO:0051082; unfolded protein binding; molecular_function}	{XM_010682862.2; PREDICTED: Beta vulgaris subsp. vulgaris Heat shock protein 90-5, chloroplastic (LOC104896153), transcript variant X1, mRNA}	{PF00183:Hsp90 protein}
transcript_HQ_BAB_transcript7490/f2p0/2881	0.36519	2.3611e-05	6.6213e-05	{KNA13977.1; hypothetical protein SOVF_111670 [Spinacia oleracea]}	{sp|Q9SAB1|HSP7Q_ARATH; Heat shock 70 kDa protein 16 OS=Arabidopsis thaliana GN=HSP70-16 PE=2 SV=1}	{rcu:8282894; K09489 HSPA4 heat shock 70kDa protein 4 - ko04530; Cellular Processes; Cellular community - eukaryotes; Tight junction | ko04612; Organismal Systems; Immune system; Antigen processing and presentation}	{At1g11660; KOG0103 Molecular chaperones HSP105/HSP110/SSE1, HSP70 superfamily O Posttranslational modification, protein turnover, chaperones ;}	{GO:0009246; enterobacterial common antigen biosynthetic process; biological_process GO:0016021; integral to membrane; cellular_component GO:0000902; cell morphogenesis; biological_process}	{XM_010667267.2; PREDICTED: Beta vulgaris subsp. vulgaris heat shock 70 kDa protein 16 (LOC104882850), mRNA}	{PF06899:WzyE protein, O-antigen assembly polymerase PF06723:MreB/Mbl protein}
transcript_HQ_BAB_transcript6729/f3p0/2976	-0.76433	3.3699e-26	2.7144e-25	{XP_010665948.1; PREDICTED: Heat shock protein 90-6, mitochondrial [Beta vulgaris subsp. vulgaris]}	{sp|F4JFN3|HS906_ARATH; Heat shock protein 90-6, mitochondrial OS=Arabidopsis thaliana GN=HSP90-6 PE=2 SV=1}	{adu:107473808; K09487 HSP90B, TRA1 Heat shock protein 90kDa beta - ko04141; Genetic Information Processing; Folding, sorting and degradation; Protein processing in endoplasmic reticulum | ko04151; Environmental Information Processing; Signal transduction; PI3K-Akt signaling pathway | ko04657; Organismal Systems; Immune system; IL-17 signaling pathway | ko04915; Organismal Systems; Endocrine syst…	{At3g07770; KOG0019 Molecular chaperone (HSP90 family) O Posttranslational modification, protein turnover, chaperones ;}	{GO:0005524; ATP binding; molecular_function GO:0051082; unfolded protein binding; molecular_function GO:0006457; protein folding; biological_process GO:0006950; response to stress; biological_process}	{XM_010667646.2; PREDICTED: Beta vulgaris subsp. vulgaris Heat shock protein 90-6, mitochondrial (LOC104883173), mRNA}	{PF00183:Hsp90 protein}
transcript_HQ_BAB_transcript5451/f2p0/3206	-0.62384	1.3948e-48	1.9086e-47	{KNA11575.1; hypothetical protein SOVF_133880 [Spinacia oleracea]}	{sp|Q9S7C0|HSP7O_ARATH; Heat shock 70 kDa protein 14 OS=Arabidopsis thaliana GN=HSP70-14 PE=2 SV=1}	{sot:102601134; K09489 HSPA4 heat shock 70kDa protein 4 - ko04530; Cellular Processes; Cellular community - eukaryotes; Tight junction | ko04612; Organismal Systems; Immune system; Antigen processing and presentation}	{At1g79930; KOG0103 Molecular chaperones HSP105/HSP110/SSE1, HSP70 superfamily O Posttranslational modification, protein turnover, chaperones ;}	{GO:0000902; cell morphogenesis; biological_process}	{XM_010692990.2; PREDICTED: Beta vulgaris subsp. vulgaris heat shock 70 kDa protein 15 (LOC104904660), mRNA}	{PF06723:MreB/Mbl protein}
transcript_HQ_BAB_transcript3021/f4p0/3633	1.3546	3.3783e-06	1.0295e-05	{XP_010696182.1; PREDICTED: ankyrin-1-like [Beta vulgaris subsp. vulgaris]}	{sp|A2CIR5|NPR4_ORYSJ; Ankyrin repeat-containing protein NPR4 OS=Oryza sativa subsp. japonica GN=NPR4 PE=2 SV=1}	{bvg:104888144; - - - - -}	{At4g03440; KOG0504 FOG: Ankyrin repeat R General function prediction only ;}	{GO:0009055; NA GO:0016020; membrane; cellular_component GO:0016491; oxidoreductase activity; molecular_function GO:0005515; protein binding; molecular_function GO:0005261; cation channel activity; molecular_function GO:0033644; host cell membrane; cellular_component GO:0032801; receptor catabolic process; biological_process GO:0005515; protein binding; molecular_function GO:0019076; release of v…	{XM_010697911.1; PREDICTED: Beta vulgaris subsp. vulgaris ankyrin repeat-containing protein NPR4-like (LOC104908763), mRNA}	{PF00023:Ankyrin repeat PF13606:Ankyrin repeat PF04119:Heat shock protein 9/12 PF00558:Vpu protein PF13606:Ankyrin repeat PF00032:Cytochrome b(C-terminal)/b6/petD PF00023:Ankyrin repeat}
transcript_HQ_BAB_transcript20602/f2p0/652	-0.54448	1.503e-07	5.156e-07	{XP_010673239.1; PREDICTED: abscisic stress-ripening protein 1 [Beta vulgaris subsp. vulgaris]}	{sp|Q08655|ASR1_SOLLC; Abscisic stress-ripening protein 1 OS=Solanum lycopersicum GN=ASR1 PE=2 SV=1}	{bvg:104889661; - - - - -}	{NA}	{GO:0006950; response to stress; biological_process}	{XM_010674937.2; PREDICTED: Beta vulgaris subsp. vulgaris abscisic stress-ripening protein 1 (LOC104889661), mRNA}	{PF02496:ABA/WDS induced protein}
transcript_HQ_BAB_transcript20558/f2p0/797	-0.24691	1.0668e-13	5.3663e-13	{XP_010680967.1; PREDICTED: abscisic stress-ripening protein 2 [Beta vulgaris subsp. vulgaris]}	{sp|Q08655|ASR1_SOLLC; Abscisic stress-ripening protein 1 OS=Solanum lycopersicum GN=ASR1 PE=2 SV=1}	{bvg:104895999; - - - - -}	{NA}	{GO:0006950; response to stress; biological_process}	{XM_007201237.1; Prunus persica hypothetical protein (PRUPE_ppa011853mg) mRNA, complete cds}	{PF02496:ABA/WDS induced protein}
transcript_HQ_BAB_transcript20552/f26p0/799	-0.82252	3.5462e-151	1.5448e-149	{XP_010671173.1; PREDICTED: uncharacterized protein LOC104888047 [Beta vulgaris subsp. vulgaris]}	{NA}	{bvg:104888047; - - - - -}	{NA}	{GO:0006950; response to stress; biological_process}	{NA}	{PF03242:Late embryogenesis abundant protein}
transcript_HQ_BAB_transcript20551/f12p0/804	1.2848	4.2914e-282	4.1591e-280	{AEZ67462.1; late embryogenesis abundant proteins, partial [Haloxylon ammodendron]}	{sp|Q39644|LEA5_CITSI; Late embryogenesis abundant protein Lea5 OS=Citrus sinensis GN=LEA5 PE=2 SV=1}	{nnu:104598918; - - - - -}	{NA}	{GO:0006950; response to stress; biological_process}	{JQ277729.1; Haloxylon ammodendron late embryogenesis abundant proteins (LEA3) mRNA, partial cds}	{PF03242:Late embryogenesis abundant protein}
transcript_HQ_BAB_transcript20431/f3p0/980	-2.1233	0	0	{XP_010680902.1; PREDICTED: glycine-rich cell wall structural protein 1.8 [Beta vulgaris subsp. vulgaris]}	{sp|P37219|ASR2_SOLLC; Abscisic stress-ripening protein 2 OS=Solanum lycopersicum GN=ASR2 PE=4 SV=1}	{bvg:104895948; - - - - -}	{NA}	{GO:0006950; response to stress; biological_process}	{XM_010682600.2; PREDICTED: Beta vulgaris subsp. vulgaris glycine-rich cell wall structural protein 1.8 (LOC104895948), mRNA}	{PF02496:ABA/WDS induced protein}
transcript_HQ_BAB_transcript20383/f2p0/1054	0.73642	3.9507e-43	4.8614e-42	{AJK93570.1; tonoplast intrinsic protein [Suaeda glauca]}	{sp|P50156|TIP11_ORYSJ; Probable Aquaporin TIP1-1 OS=Oryza sativa subsp. japonica GN=TIP1-1 PE=2 SV=1}	{nnu:104594630; K09873 TIP Aquaporin TIP - -}	{At4g01470; KOG0223 Aquaporin (major intrinsic protein family) G Carbohydrate transport and metabolism ;}	{GO:0006810; transport; biological_process GO:0016020; membrane; cellular_component GO:0005215; NA}	{KP006434.1; Suaeda glauca tonoplast intrinsic protein mRNA, complete cds}	{PF00230:Major intrinsic protein}
transcript_HQ_BAB_transcript20362/f5p0/1025	0.298	6.2731e-13	3.0434e-12	{XP_010680902.1; PREDICTED: glycine-rich cell wall structural protein 1.8 [Beta vulgaris subsp. vulgaris]}	{sp|P37220|ASR3_SOLLC; Abscisic stress-ripening protein 3 OS=Solanum lycopersicum GN=ASR3 PE=4 SV=2}	{bvg:104895948; - - - - -}	{NA}	{GO:0006950; response to stress; biological_process}	{XM_010682600.2; PREDICTED: Beta vulgaris subsp. vulgaris glycine-rich cell wall structural protein 1.8 (LOC104895948), mRNA}	{PF02496:ABA/WDS induced protein}
transcript_HQ_BAB_transcript19964/f4p0/1263	1.0036	1.4927e-84	3.5797e-83	{ABE03629.1; plasma membrane major intrinsic protein [Salicornia bigelovii]}	{sp|Q39196|PIP14_ARATH; Probable Aquaporin PIP1-4 OS=Arabidopsis thaliana GN=PIP1.4 PE=1 SV=1}	{sot:102598096; K09872 PIP Aquaporin PIP - -}	{At1g01620; KOG0223 Aquaporin (major intrinsic protein family) G Carbohydrate transport and metabolism ;}	{GO:0005215; NA GO:0016020; membrane; cellular_component GO:0006810; transport; biological_process}	{DQ451602.1; Salicornia bigelovii plasma membrane major intrinsic protein (PIP1) mRNA, complete cds}	{PF00230:Major intrinsic protein}
transcript_HQ_BAB_transcript19921/f2p0/1291	-0.83529	2.285e-71	4.5804e-70	{AEZ67462.1; late embryogenesis abundant proteins, partial [Haloxylon ammodendron]}	{sp|Q39644|LEA5_CITSI; Late embryogenesis abundant protein Lea5 OS=Citrus sinensis GN=LEA5 PE=2 SV=1}	{nnu:104598918; - - - - -}	{NA}	{GO:0006950; response to stress; biological_process}	{JQ277729.1; Haloxylon ammodendron late embryogenesis abundant proteins (LEA3) mRNA, partial cds}	{PF03242:Late embryogenesis abundant protein}
transcript_HQ_BAB_transcript19895/f4p0/1299	1.7376	2.5591e-66	4.7099e-65	{XP_010684101.1; PREDICTED: Aquaporin PIP2-1 [Beta vulgaris subsp. vulgaris]}	{sp|P43286|PIP21_ARATH; Aquaporin PIP2-1 OS=Arabidopsis thaliana GN=PIP2-1 PE=1 SV=1}	{mdm:103450053; K09872 PIP Aquaporin PIP - -}	{At3g53420; KOG0223 Aquaporin (major intrinsic protein family) G Carbohydrate transport and metabolism ;}	{GO:0005215; NA GO:0016020; membrane; cellular_component GO:0006810; transport; biological_process}	{XM_010685799.2; PREDICTED: Beta vulgaris subsp. vulgaris Aquaporin PIP2-1 (LOC104898695), mRNA}	{PF00230:Major intrinsic protein}
transcript_HQ_BAB_transcript19835/f3p0/1322	-1.0475	1.0232e-15	5.6486e-15	{XP_010680902.1; PREDICTED: glycine-rich cell wall structural protein 1.8 [Beta vulgaris subsp. vulgaris]}	{sp|Q08655|ASR1_SOLLC; Abscisic stress-ripening protein 1 OS=Solanum lycopersicum GN=ASR1 PE=2 SV=1}	{bvg:104895948; - - - - -}	{NA}	{GO:0006950; response to stress; biological_process}	{KC460335.1; Suaeda liaotungensis abscisic acid stress ripening-related protein (ASR) mRNA, complete cds}	{PF02496:ABA/WDS induced protein}
transcript_HQ_BAB_transcript1624/f4p0/4066	-2.1933	2.6342e-16	1.4889e-15	{XP_010696210.2; PREDICTED: serine/threonine-protein phosphatase 6 regulatory ankyrin repeat subunit B-like [Beta vulgaris subsp. vulgaris]}	{sp|P16157|ANK1_HUMAN; Ankyrin-1 OS=Homo sapiens GN=ANK1 PE=1 SV=3}	{bvg:104888144; - - - - -}	{At4g03440; KOG0504 FOG: Ankyrin repeat R General function prediction only ;}	{GO:0005515; protein binding; molecular_function GO:0006950; response to stress; biological_process}	{NA}	{PF04119:Heat shock protein 9/12 PF00023:Ankyrin repeat PF13606:Ankyrin repeat}
transcript_HQ_BAB_transcript16055/f2p0/1907	-1.6074	1.2661e-15	6.9716e-15	{XP_020085019.1; Heat shock protein 83-like [Ananas comosus]}	{sp|P36182|HSP82_TOBAC; Heat shock protein 82 (Fragment) OS=Nicotiana tabacum GN=HSP82 PE=2 SV=1}	{bvg:104888372; K04079 HSP90A, htpG molecular chaperone HtpG - ko04141; Genetic Information Processing; Folding, sorting and degradation; Protein processing in endoplasmic reticulum | ko04151; Environmental Information Processing; Signal transduction; PI3K-Akt signaling pathway | ko04621; Organismal Systems; Immune system; NOD-like receptor signaling pathway | ko04612; Organismal Systems; Immune …	{At5g52640; KOG0019 Molecular chaperone (HSP90 family) O Posttranslational modification, protein turnover, chaperones ;}	{GO:0051082; unfolded protein binding; molecular_function GO:0006457; protein folding; biological_process GO:0006950; response to stress; biological_process GO:0005524; ATP binding; molecular_function}	{XM_010673323.2; PREDICTED: Beta vulgaris subsp. vulgaris Heat shock protein 83 (LOC104888372), mRNA}	{PF00183:Hsp90 protein}
transcript_HQ_BAB_transcript13669/f4p0/2148	-3.2065	0	0	{XP_015058100.1; PREDICTED: heat shock cognate 70 kDa protein 2-like [Solanum pennellii]}	{sp|P27322|HSP72_SOLLC; Heat shock cognate 70 kDa protein 2 OS=Solanum lycopersicum GN=HSC-2 PE=2 SV=1}	{nta:107768506; - - - - -}	{At5g02500; KOG0101 Molecular chaperones HSP70/HSC70, HSP70 superfamily O Posttranslational modification, protein turnover, chaperones ;}	{GO:0005975; carbohydrate metabolic process; biological_process GO:0000902; cell morphogenesis; biological_process GO:0016773; phosphotransferase activity, alcohol group as acceptor; molecular_function GO:0030436; asexual sporulation; biological_process GO:0016787; hydrolase activity; molecular_function}	{AF034617.1; Spinacia oleracea cytosolic heat shock 70 protein (HSC70-3alpha) gene, complete cds}	{PF02782:FGGY family of carbohydrate kinases, C-terminal domain PF01968:Hydantoinase/oxoprolinase PF06723:MreB/Mbl protein PF14098:Small, acid-soluble spore protein I}
transcript_HQ_BAB_transcript13642/f2p0/2151	-1.7139	5.0912e-95	1.3898e-93	{XP_016681571.1; PREDICTED: probable mediator of RNA polymerase II transcription subunit 37c [Gossypium hirsutum]}	{sp|P27322|HSP72_SOLLC; Heat shock cognate 70 kDa protein 2 OS=Solanum lycopersicum GN=HSC-2 PE=2 SV=1}	{cmo:103490108; K03283 HSPA1_8 heat shock 70kDa protein 1/8 - ko03040; Genetic Information Processing; Transcription; Spliceosome | ko04141; Genetic Information Processing; Folding, sorting and degradation; Protein processing in endoplasmic reticulum | ko04010; Environmental Information Processing; Signal transduction; MAPK signaling pathway | ko04144; Cellular Processes; Transport and catabolism…	{At5g02500; KOG0101 Molecular chaperones HSP70/HSC70, HSP70 superfamily O Posttranslational modification, protein turnover, chaperones ;}	{GO:0005975; carbohydrate metabolic process; biological_process GO:0000902; cell morphogenesis; biological_process GO:0016773; phosphotransferase activity, alcohol group as acceptor; molecular_function}	{AF033852.1; Spinacia oleracea cytosolic heat shock 70 protein (HSC70) mRNA, complete cds}	{PF06723:MreB/Mbl protein PF02782:FGGY family of carbohydrate kinases, C-terminal domain}
transcript_HQ_BAB_transcript12816/f2p0/2238	0.86539	0.0033078	0.0070273	{XP_010678704.1; PREDICTED: heat shock cognate 70 kDa protein-like [Beta vulgaris subsp. vulgaris]}	{sp|P09189|HSP7C_PETHY; Heat shock cognate 70 kDa protein OS=Petunia hybrida GN=HSP70 PE=2 SV=1}	{bvg:104894215; K03283 HSPA1_8 heat shock 70kDa protein 1/8 - ko03040; Genetic Information Processing; Transcription; Spliceosome | ko04141; Genetic Information Processing; Folding, sorting and degradation; Protein processing in endoplasmic reticulum | ko04010; Environmental Information Processing; Signal transduction; MAPK signaling pathway | ko04144; Cellular Processes; Transport and catabolism…	{At3g12580; KOG0101 Molecular chaperones HSP70/HSC70, HSP70 superfamily O Posttranslational modification, protein turnover, chaperones ;}	{GO:0005975; carbohydrate metabolic process; biological_process GO:0000902; cell morphogenesis; biological_process GO:0016773; phosphotransferase activity, alcohol group as acceptor; molecular_function}	{XM_002527690.2; PREDICTED: Ricinus communis heat shock cognate 70 kDa protein 2 (LOC8279580), mRNA}	{PF02782:FGGY family of carbohydrate kinases, C-terminal domain PF06723:MreB/Mbl protein}
transcript_HQ_BAB_transcript12259/f15p0/2269	-0.46362	1.9466e-30	1.7667e-29	{AAA62445.1; Heat shock protein [Spinacia oleracea]}	{sp|P29357|HSP7E_SPIOL; Chloroplast envelope membrane 70 kDa heat shock-related protein OS=Spinacia oleracea GN=SCE70 PE=1 SV=3}	{bvg:104887018; K03283 HSPA1_8 heat shock 70kDa protein 1/8 - ko03040; Genetic Information Processing; Transcription; Spliceosome | ko04141; Genetic Information Processing; Folding, sorting and degradation; Protein processing in endoplasmic reticulum | ko04010; Environmental Information Processing; Signal transduction; MAPK signaling pathway | ko04144; Cellular Processes; Transport and catabolism…	{At3g12580; KOG0101 Molecular chaperones HSP70/HSC70, HSP70 superfamily O Posttranslational modification, protein turnover, chaperones ;}	{GO:0016787; hydrolase activity; molecular_function GO:0016773; phosphotransferase activity, alcohol group as acceptor; molecular_function GO:0005975; carbohydrate metabolic process; biological_process GO:0000902; cell morphogenesis; biological_process}	{L26243.1; Spinacia oleracea heat shock C70 protein mRNA, complete cds}	{PF06723:MreB/Mbl protein PF02782:FGGY family of carbohydrate kinases, C-terminal domain PF01968:Hydantoinase/oxoprolinase}
transcript_HQ_BAB_transcript11975/f3p0/2340	1.6503	1.1546e-112	3.7244e-111	{EOY34079.1; Heat shock cognate protein 70-1 [Theobroma cacao]}	{sp|P27322|HSP72_SOLLC; Heat shock cognate 70 kDa protein 2 OS=Solanum lycopersicum GN=HSC-2 PE=2 SV=1}	{pda:103696725; K03283 HSPA1_8 heat shock 70kDa protein 1/8 - ko03040; Genetic Information Processing; Transcription; Spliceosome | ko04141; Genetic Information Processing; Folding, sorting and degradation; Protein processing in endoplasmic reticulum | ko04010; Environmental Information Processing; Signal transduction; MAPK signaling pathway | ko04144; Cellular Processes; Transport and catabolism…	{At3g12580; KOG0101 Molecular chaperones HSP70/HSC70, HSP70 superfamily O Posttranslational modification, protein turnover, chaperones ;}	{GO:0016773; phosphotransferase activity, alcohol group as acceptor; molecular_function GO:0000902; cell morphogenesis; biological_process GO:0005975; carbohydrate metabolic process; biological_process GO:0016787; hydrolase activity; molecular_function}	{XM_010687493.2; PREDICTED: Beta vulgaris subsp. vulgaris heat shock cognate 70 kDa protein 2 (LOC104900138), mRNA}	{PF02782:FGGY family of carbohydrate kinases, C-terminal domain PF01968:Hydantoinase/oxoprolinase PF06723:MreB/Mbl protein}
transcript_HQ_BAB_transcript11051/f2p0/2444	-1.3955	6.5311e-182	3.5473e-180	{EOY34079.1; Heat shock cognate protein 70-1 [Theobroma cacao]}	{sp|P27322|HSP72_SOLLC; Heat shock cognate 70 kDa protein 2 OS=Solanum lycopersicum GN=HSC-2 PE=2 SV=1}	{pda:103696725; K03283 HSPA1_8 heat shock 70kDa protein 1/8 - ko03040; Genetic Information Processing; Transcription; Spliceosome | ko04141; Genetic Information Processing; Folding, sorting and degradation; Protein processing in endoplasmic reticulum | ko04010; Environmental Information Processing; Signal transduction; MAPK signaling pathway | ko04144; Cellular Processes; Transport and catabolism…	{At3g12580; KOG0101 Molecular chaperones HSP70/HSC70, HSP70 superfamily O Posttranslational modification, protein turnover, chaperones ;}	{GO:0016787; hydrolase activity; molecular_function GO:0016773; phosphotransferase activity, alcohol group as acceptor; molecular_function GO:0005975; carbohydrate metabolic process; biological_process GO:0000902; cell morphogenesis; biological_process}	{XM_010687493.2; PREDICTED: Beta vulgaris subsp. vulgaris heat shock cognate 70 kDa protein 2 (LOC104900138), mRNA}	{PF06723:MreB/Mbl protein PF01968:Hydantoinase/oxoprolinase PF02782:FGGY family of carbohydrate kinases, C-terminal domain}
transcript_HQ_BAB_transcript10670/f2p0/2485	-1.3288	1.4729e-29	1.3032e-28	{EOY34079.1; Heat shock cognate protein 70-1 [Theobroma cacao]}	{sp|P27322|HSP72_SOLLC; Heat shock cognate 70 kDa protein 2 OS=Solanum lycopersicum GN=HSC-2 PE=2 SV=1}	{pda:103696725; K03283 HSPA1_8 heat shock 70kDa protein 1/8 - ko03040; Genetic Information Processing; Transcription; Spliceosome | ko04141; Genetic Information Processing; Folding, sorting and degradation; Protein processing in endoplasmic reticulum | ko04010; Environmental Information Processing; Signal transduction; MAPK signaling pathway | ko04144; Cellular Processes; Transport and catabolism…	{At3g12580; KOG0101 Molecular chaperones HSP70/HSC70, HSP70 superfamily O Posttranslational modification, protein turnover, chaperones ;}	{GO:0016773; phosphotransferase activity, alcohol group as acceptor; molecular_function GO:0005975; carbohydrate metabolic process; biological_process GO:0000902; cell morphogenesis; biological_process GO:0016787; hydrolase activity; molecular_function}	{XM_010687493.2; PREDICTED: Beta vulgaris subsp. vulgaris heat shock cognate 70 kDa protein 2 (LOC104900138), mRNA}	{PF06723:MreB/Mbl protein PF01968:Hydantoinase/oxoprolinase PF02782:FGGY family of carbohydrate kinases, C-terminal domain}
transcript_HQ_BAB_transcript10266/f25p0/2454	-1.0967	1.1478e-92	3.02e-91	{XP_020085019.1; Heat shock protein 83-like [Ananas comosus]}	{sp|P51819|HSP83_IPONI; Heat shock protein 83 OS=Ipomoea nil GN=HSP83A PE=2 SV=1}	{bvg:104888372; K04079 HSP90A, htpG molecular chaperone HtpG - ko04141; Genetic Information Processing; Folding, sorting and degradation; Protein processing in endoplasmic reticulum | ko04151; Environmental Information Processing; Signal transduction; PI3K-Akt signaling pathway | ko04621; Organismal Systems; Immune system; NOD-like receptor signaling pathway | ko04612; Organismal Systems; Immune …	{At5g52640; KOG0019 Molecular chaperone (HSP90 family) O Posttranslational modification, protein turnover, chaperones ;}	{GO:0051082; unfolded protein binding; molecular_function GO:0006457; protein folding; biological_process GO:0006950; response to stress; biological_process GO:0005524; ATP binding; molecular_function}	{XM_010673323.2; PREDICTED: Beta vulgaris subsp. vulgaris Heat shock protein 83 (LOC104888372), mRNA}	{PF00183:Hsp90 protein}
transcript_HQ_BAB_transcript10140/f3p0/2567	-0.56243	1.9041e-33	1.8712e-32	{AAB91473.1; heat shock 70 protein [Spinacia oleracea]}	{sp|Q01899|HSP7M_PHAVU; Heat shock 70 kDa protein, mitochondrial OS=Phaseolus vulgaris PE=2 SV=1}	{csv:101216102; K03283 HSPA1_8 heat shock 70kDa protein 1/8 - ko03040; Genetic Information Processing; Transcription; Spliceosome | ko04141; Genetic Information Processing; Folding, sorting and degradation; Protein processing in endoplasmic reticulum | ko04010; Environmental Information Processing; Signal transduction; MAPK signaling pathway | ko04144; Cellular Processes; Transport and catabolism…	{At5g09590; KOG0102 Molecular chaperones mortalin/PBP74/GRP75, HSP70 superfamily O Posttranslational modification, protein turnover, chaperones ;}	{GO:0016773; phosphotransferase activity, alcohol group as acceptor; molecular_function GO:0005525; GTP binding; molecular_function GO:0005975; carbohydrate metabolic process; biological_process GO:0000902; cell morphogenesis; biological_process}	{XM_010693161.2; PREDICTED: Beta vulgaris subsp. vulgaris heat shock 70 kDa protein, mitochondrial (LOC104904782), mRNA}	{PF01031:Dynamin central region PF02782:FGGY family of carbohydrate kinases, C-terminal domain PF06723:MreB/Mbl protein}

## Sheet: LB vs. HB
Table S8 DEGs encoding drought stress proteins in Haloxylon persicum
Gene_id	log2FoldChange	pval	padj	{nr}	{SwissProt}	{KEGG}	{KOG}	{GO}	{nt}	{pfam}
transcript_HQ_SAB_transcript29992/f3p0/870	7.0963	1.3069e-239	6.8598e-238	{XP_010671625.1; PREDICTED: Heat shock protein 83 [Beta vulgaris subsp. vulgaris]}	{sp|P51819|HSP83_IPONI; Heat shock protein 83 OS=Ipomoea nil GN=HSP83A PE=2 SV=1}	{bvg:104888372; K04079 HSP90A, htpG molecular chaperone HtpG - ko04141; Genetic Information Processing; Folding, sorting and degradation; Protein processing in endoplasmic reticulum | ko04151; Environmental Information Processing; Signal transduction; PI3K-Akt signaling pathway | ko04621; Organismal Systems; Immune system; NOD-like receptor signaling pathway | ko04612; Organismal Systems; Immune …	{At5g52640; KOG0019 Molecular chaperone (HSP90 family) O Posttranslational modification, protein turnover, chaperones ;}	{GO:0006457; protein folding; biological_process GO:0005524; ATP binding; molecular_function GO:0006950; response to stress; biological_process GO:0051082; unfolded protein binding; molecular_function}	{XM_010673323.2; PREDICTED: Beta vulgaris subsp. vulgaris Heat shock protein 83 (LOC104888372), mRNA}	{PF00183:Hsp90 protein}
transcript_HQ_BAB_transcript10266/f25p0/2454	3.5818	2.3993e-149	5.8382e-148	{XP_020085019.1; Heat shock protein 83-like [Ananas comosus]}	{sp|P51819|HSP83_IPONI; Heat shock protein 83 OS=Ipomoea nil GN=HSP83A PE=2 SV=1}	{bvg:104888372; K04079 HSP90A, htpG molecular chaperone HtpG - ko04141; Genetic Information Processing; Folding, sorting and degradation; Protein processing in endoplasmic reticulum | ko04151; Environmental Information Processing; Signal transduction; PI3K-Akt signaling pathway | ko04621; Organismal Systems; Immune system; NOD-like receptor signaling pathway | ko04612; Organismal Systems; Immune …	{At5g52640; KOG0019 Molecular chaperone (HSP90 family) O Posttranslational modification, protein turnover, chaperones ;}	{GO:0051082; unfolded protein binding; molecular_function GO:0006457; protein folding; biological_process GO:0006950; response to stress; biological_process GO:0005524; ATP binding; molecular_function}	{XM_010673323.2; PREDICTED: Beta vulgaris subsp. vulgaris Heat shock protein 83 (LOC104888372), mRNA}	{PF00183:Hsp90 protein}
transcript_HQ_SAB_transcript9608/f7p0/2333	0.6368	5.5111e-08	1.2557e-07	{XP_015058100.1; PREDICTED: heat shock cognate 70 kDa protein 2-like [Solanum pennellii]}	{sp|P27322|HSP72_SOLLC; Heat shock cognate 70 kDa protein 2 OS=Solanum lycopersicum GN=HSC-2 PE=2 SV=1}	{nta:107768506; - - - - -}	{At5g02500; KOG0101 Molecular chaperones HSP70/HSC70, HSP70 superfamily O Posttranslational modification, protein turnover, chaperones ;}	{GO:0016787; hydrolase activity; molecular_function GO:0005975; carbohydrate metabolic process; biological_process GO:0000902; cell morphogenesis; biological_process GO:0030436; asexual sporulation; biological_process GO:0016773; phosphotransferase activity, alcohol group as acceptor; molecular_function}	{AF033852.1; Spinacia oleracea cytosolic heat shock 70 protein (HSC70) mRNA, complete cds}	{PF14098:Small, acid-soluble spore protein I PF01968:Hydantoinase/oxoprolinase PF02782:FGGY family of carbohydrate kinases, C-terminal domain PF06723:MreB/Mbl protein}
transcript_HQ_SAB_transcript9407/f3p0/2350	4.8475	1.118e-178	3.5544e-177	{XP_008370710.1; PREDICTED: heat shock cognate 70 kDa protein 2 [Malus domestica]}	{sp|P22953|MD37E_ARATH; Probable mediator of RNA polymerase II transcription subunit 37e OS=Arabidopsis thaliana GN=MED37E PE=1 SV=3}	{mdm:103434172; K03283 HSPA1_8 heat shock 70kDa protein 1/8 - ko03040; Genetic Information Processing; Transcription; Spliceosome | ko04141; Genetic Information Processing; Folding, sorting and degradation; Protein processing in endoplasmic reticulum | ko04010; Environmental Information Processing; Signal transduction; MAPK signaling pathway | ko04144; Cellular Processes; Transport and catabolism…	{At5g02500; KOG0101 Molecular chaperones HSP70/HSC70, HSP70 superfamily O Posttranslational modification, protein turnover, chaperones ;}	{GO:0005975; carbohydrate metabolic process; biological_process GO:0016787; hydrolase activity; molecular_function GO:0000902; cell morphogenesis; biological_process GO:0016773; phosphotransferase activity, alcohol group as acceptor; molecular_function}	{KX940912.1; Spinacia oleracea Heat shock protein 70 (HSP70-14) mRNA, complete cds}	{PF01968:Hydantoinase/oxoprolinase PF02782:FGGY family of carbohydrate kinases, C-terminal domain PF06723:MreB/Mbl protein}
transcript_HQ_SAB_transcript8782/f2p0/2390	-0.38663	0.002057	0.0033425	{KJB16980.1; hypothetical protein B456_002G258500 [Gossypium raimondii]}	{sp|P09189|HSP7C_PETHY; Heat shock cognate 70 kDa protein OS=Petunia hybrida GN=HSP70 PE=2 SV=1}	{sita:101785219; K03283 HSPA1_8 heat shock 70kDa protein 1/8 - ko03040; Genetic Information Processing; Transcription; Spliceosome | ko04141; Genetic Information Processing; Folding, sorting and degradation; Protein processing in endoplasmic reticulum | ko04010; Environmental Information Processing; Signal transduction; MAPK signaling pathway | ko04144; Cellular Processes; Transport and catabolis…	{At3g12580; KOG0101 Molecular chaperones HSP70/HSC70, HSP70 superfamily O Posttranslational modification, protein turnover, chaperones ;}	{GO:0000902; cell morphogenesis; biological_process GO:0016787; hydrolase activity; molecular_function GO:0005975; carbohydrate metabolic process; biological_process GO:0016773; phosphotransferase activity, alcohol group as acceptor; molecular_function}	{XM_010687493.2; PREDICTED: Beta vulgaris subsp. vulgaris heat shock cognate 70 kDa protein 2 (LOC104900138), mRNA}	{PF06723:MreB/Mbl protein PF02782:FGGY family of carbohydrate kinases, C-terminal domain PF01968:Hydantoinase/oxoprolinase}
transcript_HQ_SAB_transcript7656/f5p0/2540	-0.75258	3.948e-08	9.0615e-08	{XP_008644594.1; PREDICTED: stromal 70 kDa heat shock-related protein, chloroplastic-like [Zea mays]}	{sp|Q02028|HSP7S_PEA; Stromal 70 kDa heat shock-related protein, chloroplastic OS=Pisum sativum GN=HSP70 PE=2 SV=1}	{sita:101770657; K03283 HSPA1_8 heat shock 70kDa protein 1/8 - ko03040; Genetic Information Processing; Transcription; Spliceosome | ko04141; Genetic Information Processing; Folding, sorting and degradation; Protein processing in endoplasmic reticulum | ko04010; Environmental Information Processing; Signal transduction; MAPK signaling pathway | ko04144; Cellular Processes; Transport and catabolis…	{At4g24280; KOG0102 Molecular chaperones mortalin/PBP74/GRP75, HSP70 superfamily O Posttranslational modification, protein turnover, chaperones ;}	{GO:0000902; cell morphogenesis; biological_process GO:0016787; hydrolase activity; molecular_function GO:0005975; carbohydrate metabolic process; biological_process GO:0016773; phosphotransferase activity, alcohol group as acceptor; molecular_function}	{XM_015203492.1; PREDICTED: Solanum pennellii heat shock 70 kDa protein 7, chloroplastic-like (LOC107005034), mRNA}	{PF06723:MreB/Mbl protein PF02782:FGGY family of carbohydrate kinases, C-terminal domain PF01968:Hydantoinase/oxoprolinase}
transcript_HQ_SAB_transcript7559/f5p0/2557	-1.38	2.6958e-10	6.9181e-10	{XP_010678704.1; PREDICTED: heat shock cognate 70 kDa protein-like [Beta vulgaris subsp. vulgaris]}	{sp|P09189|HSP7C_PETHY; Heat shock cognate 70 kDa protein OS=Petunia hybrida GN=HSP70 PE=2 SV=1}	{bvg:104894215; K03283 HSPA1_8 heat shock 70kDa protein 1/8 - ko03040; Genetic Information Processing; Transcription; Spliceosome | ko04141; Genetic Information Processing; Folding, sorting and degradation; Protein processing in endoplasmic reticulum | ko04010; Environmental Information Processing; Signal transduction; MAPK signaling pathway | ko04144; Cellular Processes; Transport and catabolism…	{At5g02500; KOG0101 Molecular chaperones HSP70/HSC70, HSP70 superfamily O Posttranslational modification, protein turnover, chaperones ;}	{GO:0051382; kinetochore assembly; biological_process GO:0000902; cell morphogenesis; biological_process GO:0006281; DNA repair; biological_process}	{XM_016331813.1; PREDICTED: Arachis ipaensis heat shock cognate 70 kDa protein 2 (LOC107629112), mRNA}	{PF06723:MreB/Mbl protein PF09415:CENP-S associating Centromere protein X}
transcript_HQ_SAB_transcript7435/f6p0/2556	-0.92216	2.964e-10	7.5818e-10	{XP_010691463.1; PREDICTED: heat shock 70 kDa protein, mitochondrial [Beta vulgaris subsp. vulgaris]}	{sp|Q01899|HSP7M_PHAVU; Heat shock 70 kDa protein, mitochondrial OS=Phaseolus vulgaris PE=2 SV=1}	{vvi:100248447; K03283 HSPA1_8 heat shock 70kDa protein 1/8 - ko03040; Genetic Information Processing; Transcription; Spliceosome | ko04141; Genetic Information Processing; Folding, sorting and degradation; Protein processing in endoplasmic reticulum | ko04010; Environmental Information Processing; Signal transduction; MAPK signaling pathway | ko04144; Cellular Processes; Transport and catabolism…	{At5g09590; KOG0102 Molecular chaperones mortalin/PBP74/GRP75, HSP70 superfamily O Posttranslational modification, protein turnover, chaperones ;}	{GO:0005525; GTP binding; molecular_function GO:0000902; cell morphogenesis; biological_process GO:0006357; regulation of transcription from RNA polymerase II promoter; biological_process GO:0005975; carbohydrate metabolic process; biological_process GO:0016592; mediator complex; cellular_component GO:0016773; phosphotransferase activity, alcohol group as acceptor; molecular_function GO:0001104; …	{XM_010693161.2; PREDICTED: Beta vulgaris subsp. vulgaris heat shock 70 kDa protein, mitochondrial (LOC104904782), mRNA}	{PF01031:Dynamin central region PF02782:FGGY family of carbohydrate kinases, C-terminal domain PF10018:Vitamin-D-receptor interacting Mediator subunit 4 PF06723:MreB/Mbl protein}
transcript_HQ_SAB_transcript7246/f10p0/2498	0.61497	0.00011499	0.00020972	{KJB22185.1; hypothetical protein B456_004G034000 [Gossypium raimondii]}	{sp|P36182|HSP82_TOBAC; Heat shock protein 82 (Fragment) OS=Nicotiana tabacum GN=HSP82 PE=2 SV=1}	{cic:CICLE_v10019095mg; K04079 HSP90A, htpG molecular chaperone HtpG - ko04141; Genetic Information Processing; Folding, sorting and degradation; Protein processing in endoplasmic reticulum | ko04151; Environmental Information Processing; Signal transduction; PI3K-Akt signaling pathway | ko04621; Organismal Systems; Immune system; NOD-like receptor signaling pathway | ko04612; Organismal Systems;…	{At5g52640; KOG0019 Molecular chaperone (HSP90 family) O Posttranslational modification, protein turnover, chaperones ;}	{GO:0005524; ATP binding; molecular_function GO:0006457; protein folding; biological_process GO:0006950; response to stress; biological_process GO:0051082; unfolded protein binding; molecular_function}	{XM_004516815.2; PREDICTED: Cicer arietinum Heat shock protein 83 (LOC101511551), mRNA}	{PF00183:Hsp90 protein}
transcript_HQ_SAB_transcript7151/f5p0/2611	0.44154	0.00043068	0.00074744	{XP_020085019.1; Heat shock protein 83-like [Ananas comosus]}	{sp|P51819|HSP83_IPONI; Heat shock protein 83 OS=Ipomoea nil GN=HSP83A PE=2 SV=1}	{bvg:104888372; K04079 HSP90A, htpG molecular chaperone HtpG - ko04141; Genetic Information Processing; Folding, sorting and degradation; Protein processing in endoplasmic reticulum | ko04151; Environmental Information Processing; Signal transduction; PI3K-Akt signaling pathway | ko04621; Organismal Systems; Immune system; NOD-like receptor signaling pathway | ko04612; Organismal Systems; Immune …	{At5g52640; KOG0019 Molecular chaperone (HSP90 family) O Posttranslational modification, protein turnover, chaperones ;}	{GO:0006950; response to stress; biological_process GO:0051082; unfolded protein binding; molecular_function GO:0006457; protein folding; biological_process GO:0005524; ATP binding; molecular_function}	{XM_010673323.2; PREDICTED: Beta vulgaris subsp. vulgaris Heat shock protein 83 (LOC104888372), mRNA}	{PF00183:Hsp90 protein}
transcript_HQ_SAB_transcript6389/f7p0/2689	-1.1253	8.588e-17	2.8641e-16	{XP_008355028.1; PREDICTED: Heat shock protein 90-2 [Malus domestica]}	{sp|P36181|HSP80_SOLLC; Heat shock cognate protein 80 OS=Solanum lycopersicum GN=HSC80 PE=2 SV=1}	{gra:105791396; K04079 HSP90A, htpG molecular chaperone HtpG - ko04141; Genetic Information Processing; Folding, sorting and degradation; Protein processing in endoplasmic reticulum | ko04151; Environmental Information Processing; Signal transduction; PI3K-Akt signaling pathway | ko04621; Organismal Systems; Immune system; NOD-like receptor signaling pathway | ko04612; Organismal Systems; Immune …	{At5g56030; KOG0019 Molecular chaperone (HSP90 family) O Posttranslational modification, protein turnover, chaperones ;}	{GO:0016021; integral to membrane; cellular_component GO:0051082; unfolded protein binding; molecular_function GO:0006950; response to stress; biological_process GO:0006810; transport; biological_process GO:0006457; protein folding; biological_process GO:0005524; ATP binding; molecular_function}	{KC181862.1; Salicornia europaea isolate xukai1015 Heat shock protein 90 mRNA, complete cds}	{PF13897:Golgi-dynamics membrane-trafficking PF00183:Hsp90 protein}
transcript_HQ_SAB_transcript5700/f2p0/2781	-0.76185	0.0035819	0.0056781	{XP_010665948.1; PREDICTED: Heat shock protein 90-6, mitochondrial [Beta vulgaris subsp. vulgaris]}	{sp|F4JFN3|HS906_ARATH; Heat shock protein 90-6, mitochondrial OS=Arabidopsis thaliana GN=HSP90-6 PE=2 SV=1}	{adu:107473808; K09487 HSP90B, TRA1 Heat shock protein 90kDa beta - ko04141; Genetic Information Processing; Folding, sorting and degradation; Protein processing in endoplasmic reticulum | ko04151; Environmental Information Processing; Signal transduction; PI3K-Akt signaling pathway | ko04657; Organismal Systems; Immune system; IL-17 signaling pathway | ko04915; Organismal Systems; Endocrine syst…	{At3g07770; KOG0019 Molecular chaperone (HSP90 family) O Posttranslational modification, protein turnover, chaperones ;}	{GO:0051082; unfolded protein binding; molecular_function GO:0006950; response to stress; biological_process GO:0006457; protein folding; biological_process GO:0005524; ATP binding; molecular_function}	{XM_010667646.2; PREDICTED: Beta vulgaris subsp. vulgaris Heat shock protein 90-6, mitochondrial (LOC104883173), mRNA}	{PF00183:Hsp90 protein}
transcript_HQ_SAB_transcript5528/f3p0/2814	5.3883	4.0269e-148	9.6991e-147	{XP_010681165.1; PREDICTED: Heat shock protein 90-5, chloroplastic isoform X2 [Beta vulgaris subsp. vulgaris]}	{sp|Q9SIF2|HS905_ARATH; Heat shock protein 90-5, chloroplastic OS=Arabidopsis thaliana GN=HSP90-5 PE=1 SV=1}	{nnu:104600243; K09487 HSP90B, TRA1 Heat shock protein 90kDa beta - ko04141; Genetic Information Processing; Folding, sorting and degradation; Protein processing in endoplasmic reticulum | ko04151; Environmental Information Processing; Signal transduction; PI3K-Akt signaling pathway | ko04657; Organismal Systems; Immune system; IL-17 signaling pathway | ko04915; Organismal Systems; Endocrine syst…	{At2g04030; KOG0019 Molecular chaperone (HSP90 family) O Posttranslational modification, protein turnover, chaperones ;}	{GO:0051082; unfolded protein binding; molecular_function GO:0006950; response to stress; biological_process GO:0006457; protein folding; biological_process GO:0005524; ATP binding; molecular_function}	{XM_010682862.2; PREDICTED: Beta vulgaris subsp. vulgaris Heat shock protein 90-5, chloroplastic (LOC104896153), transcript variant X1, mRNA}	{PF00183:Hsp90 protein}
transcript_HQ_SAB_transcript5132/f2p0/2859	-4.6614	0.018134	0.026432	{BAJ93696.1; predicted protein [Hordeum vulgare subsp. vulgare]}	{sp|P29844|HSP7C_DROME; Heat shock 70 kDa protein cognate 3 OS=Drosophila melanogaster GN=Hsc70-3 PE=2 SV=2}	{mpp:MICPUCDRAFT_70270; K09490 HSPA5, BIP heat shock 70kDa protein 5 - ko03060; Genetic Information Processing; Folding, sorting and degradation; Protein export | ko04141; Genetic Information Processing; Folding, sorting and degradation; Protein processing in endoplasmic reticulum | ko04918; Organismal Systems; Endocrine system; Thyroid hormone synthesis | ko05020; Human Diseases; Neurodegenerati…	{7292698; KOG0100 Molecular chaperones GRP78/BiP/KAR2, HSP70 superfamily O Posttranslational modification, protein turnover, chaperones ;}	{GO:0016773; phosphotransferase activity, alcohol group as acceptor; molecular_function GO:0000902; cell morphogenesis; biological_process GO:0016787; hydrolase activity; molecular_function GO:0005975; carbohydrate metabolic process; biological_process}	{AK362492.1; Hordeum vulgare subsp. vulgare mRNA for predicted protein, complete cds, clone: NIASHv2006B10}	{PF01968:Hydantoinase/oxoprolinase PF02782:FGGY family of carbohydrate kinases, C-terminal domain PF06723:MreB/Mbl protein}
transcript_HQ_SAB_transcript5082/f3p0/2881	0.38936	0.0042386	0.0066657	{XP_010691883.1; PREDICTED: endoplasmin homolog [Beta vulgaris subsp. vulgaris]}	{sp|Q9STX5|ENPL_ARATH; Endoplasmin homolog OS=Arabidopsis thaliana GN=HSP90-7 PE=1 SV=1}	{cit:102608412; K09487 HSP90B, TRA1 Heat shock protein 90kDa beta - ko04141; Genetic Information Processing; Folding, sorting and degradation; Protein processing in endoplasmic reticulum | ko04151; Environmental Information Processing; Signal transduction; PI3K-Akt signaling pathway | ko04657; Organismal Systems; Immune system; IL-17 signaling pathway | ko04915; Organismal Systems; Endocrine syst…	{At4g24190; KOG0020 Endoplasmic reticulum glucose-regulated protein (GRP94/endoplasmin), HSP90 family O Posttranslational modification, protein turnover, chaperones ;}	{GO:0005524; ATP binding; molecular_function GO:0006457; protein folding; biological_process GO:0051082; unfolded protein binding; molecular_function GO:0006950; response to stress; biological_process}	{XM_010693581.2; PREDICTED: Beta vulgaris subsp. vulgaris endoplasmin homolog (LOC104905131), mRNA}	{PF00183:Hsp90 protein}
transcript_HQ_SAB_transcript5017/f2p0/2886	4.898	6.7681e-66	6.5994e-65	{XP_010683054.1; PREDICTED: heat shock 70 kDa protein, mitochondrial-like [Beta vulgaris subsp. vulgaris]}	{sp|Q01899|HSP7M_PHAVU; Heat shock 70 kDa protein, mitochondrial OS=Phaseolus vulgaris PE=2 SV=1}	{jcu:105636020; K03283 HSPA1_8 heat shock 70kDa protein 1/8 - ko03040; Genetic Information Processing; Transcription; Spliceosome | ko04141; Genetic Information Processing; Folding, sorting and degradation; Protein processing in endoplasmic reticulum | ko04010; Environmental Information Processing; Signal transduction; MAPK signaling pathway | ko04144; Cellular Processes; Transport and catabolism…	{At5g09590; KOG0102 Molecular chaperones mortalin/PBP74/GRP75, HSP70 superfamily O Posttranslational modification, protein turnover, chaperones ;}	{GO:0016773; phosphotransferase activity, alcohol group as acceptor; molecular_function GO:0005975; carbohydrate metabolic process; biological_process GO:0000902; cell morphogenesis; biological_process}	{XM_010684752.2; PREDICTED: Beta vulgaris subsp. vulgaris heat shock 70 kDa protein, mitochondrial-like (LOC104897806), mRNA}	{PF02782:FGGY family of carbohydrate kinases, C-terminal domain PF06723:MreB/Mbl protein}
transcript_HQ_SAB_transcript4489/f2p0/2966	0.9945	3.1827e-15	1.0051e-14	{KNA11575.1; hypothetical protein SOVF_133880 [Spinacia oleracea]}	{sp|Q9S7C0|HSP7O_ARATH; Heat shock 70 kDa protein 14 OS=Arabidopsis thaliana GN=HSP70-14 PE=2 SV=1}	{sot:102601134; K09489 HSPA4 heat shock 70kDa protein 4 - ko04530; Cellular Processes; Cellular community - eukaryotes; Tight junction | ko04612; Organismal Systems; Immune system; Antigen processing and presentation}	{At1g79930; KOG0103 Molecular chaperones HSP105/HSP110/SSE1, HSP70 superfamily O Posttranslational modification, protein turnover, chaperones ;}	{GO:0000902; cell morphogenesis; biological_process}	{XM_010692990.2; PREDICTED: Beta vulgaris subsp. vulgaris heat shock 70 kDa protein 15 (LOC104904660), mRNA}	{PF06723:MreB/Mbl protein}
transcript_HQ_SAB_transcript3704/f10p0/3117	-1.8713	4.8886e-49	3.6114e-48	{XP_015058100.1; PREDICTED: heat shock cognate 70 kDa protein 2-like [Solanum pennellii]}	{sp|P27322|HSP72_SOLLC; Heat shock cognate 70 kDa protein 2 OS=Solanum lycopersicum GN=HSC-2 PE=2 SV=1}	{nta:107768506; - - - - -}	{At5g02500; KOG0101 Molecular chaperones HSP70/HSC70, HSP70 superfamily O Posttranslational modification, protein turnover, chaperones ;}	{GO:0016773; phosphotransferase activity, alcohol group as acceptor; molecular_function GO:0016787; hydrolase activity; molecular_function GO:0005975; carbohydrate metabolic process; biological_process GO:0000902; cell morphogenesis; biological_process GO:0030436; asexual sporulation; biological_process}	{AF034617.1; Spinacia oleracea cytosolic heat shock 70 protein (HSC70-3alpha) gene, complete cds}	{PF02782:FGGY family of carbohydrate kinases, C-terminal domain PF06723:MreB/Mbl protein PF01968:Hydantoinase/oxoprolinase PF14098:Small, acid-soluble spore protein I}
transcript_HQ_SAB_transcript3419/f4p0/3182	5.014	1.304e-68	1.3216e-67	{XP_004250958.1; PREDICTED: heat shock cognate 70 kDa protein 2-like [Solanum lycopersicum]}	{sp|P27322|HSP72_SOLLC; Heat shock cognate 70 kDa protein 2 OS=Solanum lycopersicum GN=HSC-2 PE=2 SV=1}	{nta:107768506; - - - - -}	{At5g02500; KOG0101 Molecular chaperones HSP70/HSC70, HSP70 superfamily O Posttranslational modification, protein turnover, chaperones ;}	{GO:0016773; phosphotransferase activity, alcohol group as acceptor; molecular_function GO:0005975; carbohydrate metabolic process; biological_process GO:0016787; hydrolase activity; molecular_function GO:0030436; asexual sporulation; biological_process GO:0000902; cell morphogenesis; biological_process}	{AF034617.1; Spinacia oleracea cytosolic heat shock 70 protein (HSC70-3alpha) gene, complete cds}	{PF06723:MreB/Mbl protein PF02782:FGGY family of carbohydrate kinases, C-terminal domain PF01968:Hydantoinase/oxoprolinase PF14098:Small, acid-soluble spore protein I}
transcript_HQ_SAB_transcript33615/f2p0/330	4.2397	0.015435	0.022739	{XP_010691892.1; PREDICTED: 18.2 kDa class I Heat shock protein [Beta vulgaris subsp. vulgaris]}	{sp|P13853|HS17C_ARATH; 17.6 kDa class I Heat shock protein 3 OS=Arabidopsis thaliana GN=HSP17.6C PE=2 SV=2}	{bvg:104905137; K13993 HSP20 HSP20 family protein - ko04141; Genetic Information Processing; Folding, sorting and degradation; Protein processing in endoplasmic reticulum}	{At1g53540; KOG0710 Molecular chaperone (small heat-shock protein Hsp26/Hsp42) O Posttranslational modification, protein turnover, chaperones ;}	{NA}	{XM_016018423.1; PREDICTED: Ziziphus jujuba 18.5 kDa class I Heat shock protein-like (LOC107410936), mRNA}	{NA}
transcript_HQ_SAB_transcript3270/f3p0/3229	0.37605	0.0024739	0.003985	{EOY34079.1; Heat shock cognate protein 70-1 [Theobroma cacao]}	{sp|P27322|HSP72_SOLLC; Heat shock cognate 70 kDa protein 2 OS=Solanum lycopersicum GN=HSC-2 PE=2 SV=1}	{pda:103696725; K03283 HSPA1_8 heat shock 70kDa protein 1/8 - ko03040; Genetic Information Processing; Transcription; Spliceosome | ko04141; Genetic Information Processing; Folding, sorting and degradation; Protein processing in endoplasmic reticulum | ko04010; Environmental Information Processing; Signal transduction; MAPK signaling pathway | ko04144; Cellular Processes; Transport and catabolism…	{At3g12580; KOG0101 Molecular chaperones HSP70/HSC70, HSP70 superfamily O Posttranslational modification, protein turnover, chaperones ;}	{GO:0016787; hydrolase activity; molecular_function GO:0005975; carbohydrate metabolic process; biological_process GO:0000902; cell morphogenesis; biological_process GO:0016773; phosphotransferase activity, alcohol group as acceptor; molecular_function}	{KX940909.1; Spinacia oleracea Heat shock protein 70 (HSP70-13) gene, complete cds}	{PF01968:Hydantoinase/oxoprolinase PF06723:MreB/Mbl protein PF02782:FGGY family of carbohydrate kinases, C-terminal domain}
transcript_HQ_SAB_transcript32056/f2p0/606	3.4642	9.8363e-119	1.7763e-117	{XP_010673239.1; PREDICTED: abscisic stress-ripening protein 1 [Beta vulgaris subsp. vulgaris]}	{sp|P37219|ASR2_SOLLC; Abscisic stress-ripening protein 2 OS=Solanum lycopersicum GN=ASR2 PE=4 SV=1}	{bvg:104889661; - - - - -}	{NA}	{GO:0006950; response to stress; biological_process GO:0070469; respiratory chain; cellular_component GO:0022900; electron transport chain; biological_process GO:0005743; mitochondrial inner membrane; cellular_component}	{XM_010674937.2; PREDICTED: Beta vulgaris subsp. vulgaris abscisic stress-ripening protein 1 (LOC104889661), mRNA}	{PF02496:ABA/WDS induced protein PF10890:Protein of unknown function (DUF2741)}
transcript_HQ_SAB_transcript31984/f2p0/633	2.8714	2.6659e-08	6.1766e-08	{NA}	{NA}	{NA}	{NA}	{GO:0006950; response to stress; biological_process GO:0009306; protein secretion; biological_process}	{XM_010674937.2; PREDICTED: Beta vulgaris subsp. vulgaris abscisic stress-ripening protein 1 (LOC104889661), mRNA}	{PF02496:ABA/WDS induced protein PF11654:Protein of unknown function (DUF2665)}
transcript_HQ_SAB_transcript3198/f10p0/3206	-1.5326	1.5672e-23	6.4597e-23	{XP_010449736.1; PREDICTED: heat shock 70 kDa protein 17 [Camelina sativa]}	{sp|F4JMJ1|HSP7R_ARATH; Heat shock 70 kDa protein 17 OS=Arabidopsis thaliana GN=HSP70-17 PE=2 SV=1}	{bvg:104894826; K09486 HYOU1 hypoxia up-regulated 1 - ko04141; Genetic Information Processing; Folding, sorting and degradation; Protein processing in endoplasmic reticulum}	{At4g16650_2; KOG0104 Molecular chaperones GRP170/SIL1, HSP70 superfamily O Posttranslational modification, protein turnover, chaperones ;}	{GO:0000902; cell morphogenesis; biological_process GO:0000746; conjugation; biological_process}	{XM_010681163.2; PREDICTED: Beta vulgaris subsp. vulgaris heat shock 70 kDa protein 17 (LOC104894826), mRNA}	{PF06723:MreB/Mbl protein PF06412:Conjugal transfer protein TraD}
transcript_HQ_SAB_transcript31707/f2p0/671	4.3669	1.4284e-17	4.8826e-17	{XP_010673227.1; PREDICTED: abscisic stress-ripening protein 1 [Beta vulgaris subsp. vulgaris]}	{sp|P37219|ASR2_SOLLC; Abscisic stress-ripening protein 2 OS=Solanum lycopersicum GN=ASR2 PE=4 SV=1}	{bvg:104889652; - - - - -}	{NA}	{GO:0009306; protein secretion; biological_process GO:0008121; ubiquinol-cytochrome-c reductase activity; molecular_function GO:0006950; response to stress; biological_process GO:0055114; oxidation-reduction process; biological_process}	{XM_010674937.2; PREDICTED: Beta vulgaris subsp. vulgaris abscisic stress-ripening protein 1 (LOC104889661), mRNA}	{PF02496:ABA/WDS induced protein PF11654:Protein of unknown function (DUF2665) PF02921:Ubiquinol cytochrome reductase transmembrane region}
transcript_HQ_SAB_transcript31640/f2p0/683	Inf	4.1206e-55	3.3613e-54	{AHF21584.1; late embryogenesis abundant protein [Tamarix hispida]}	{NA}	{bvg:104889084; - - - - -}	{NA}	{NA}	{XM_019248655.1; PREDICTED: Beta vulgaris subsp. vulgaris hypothetical protein (LOC104889084), transcript variant X2, mRNA}	{NA}
transcript_HQ_SAB_transcript31499/f3p0/703	-2.2082	6.942e-39	4.2109e-38	{BAM64831.1; hypothetical protein [Beta vulgaris]}	{NA}	{bvg:104888047; - - - - -}	{NA}	{GO:0006950; response to stress; biological_process}	{NA}	{PF03242:Late embryogenesis abundant protein}
transcript_HQ_SAB_transcript31299/f6p0/732	-0.50953	0.00010259	0.00018792	{BAM64831.1; hypothetical protein [Beta vulgaris]}	{NA}	{bvg:104888047; - - - - -}	{NA}	{GO:0006950; response to stress; biological_process}	{NA}	{PF03242:Late embryogenesis abundant protein}
transcript_HQ_SAB_transcript31265/f6p0/727	0.42063	0.0032296	0.0051429	{XP_010671617.1; PREDICTED: heavy metal-associated isoprenylated plant protein 39 [Beta vulgaris subsp. vulgaris]}	{sp|O03982|HIP39_ARATH; Heavy metal-associated isoprenylated plant protein 39 OS=Arabidopsis thaliana GN=HIPP39 PE=2 SV=1}	{bvg:104888366; - - - - -}	{At1g01490; KOG1603 Copper chaperone P Inorganic ion transport and metabolism ;}	{GO:0006950; response to stress; biological_process GO:0046872; metal ion binding; molecular_function GO:0030001; metal ion transport; biological_process}	{XM_010673315.2; PREDICTED: Beta vulgaris subsp. vulgaris hypothetical protein (LOC104888366), mRNA}	{PF03242:Late embryogenesis abundant protein PF00403:Heavy-metal-associated domain}
transcript_HQ_SAB_transcript30839/f2p0/793	-0.99869	8.9335e-17	2.9779e-16	{AEZ67462.1; late embryogenesis abundant proteins, partial [Haloxylon ammodendron]}	{sp|Q39644|LEA5_CITSI; Late embryogenesis abundant protein Lea5 OS=Citrus sinensis GN=LEA5 PE=2 SV=1}	{nnu:104598918; - - - - -}	{NA}	{GO:0006950; response to stress; biological_process}	{JQ277729.1; Haloxylon ammodendron late embryogenesis abundant proteins (LEA3) mRNA, partial cds}	{PF03242:Late embryogenesis abundant protein}
transcript_HQ_SAB_transcript30819/f3p0/798	5.29	8.118e-63	7.5735e-62	{XP_010691892.1; PREDICTED: 18.2 kDa class I Heat shock protein [Beta vulgaris subsp. vulgaris]}	{sp|P19037|HS181_ARATH; 18.1 kDa class I Heat shock protein OS=Arabidopsis thaliana GN=HSP18.1 PE=1 SV=1}	{bvg:104905137; K13993 HSP20 HSP20 family protein - ko04141; Genetic Information Processing; Folding, sorting and degradation; Protein processing in endoplasmic reticulum}	{At5g59720; KOG0710 Molecular chaperone (small heat-shock protein Hsp26/Hsp42) O Posttranslational modification, protein turnover, chaperones ;}	{NA}	{XM_006418870.1; Eutrema salsugineum hypothetical protein (EUTSA_v10002698mg) mRNA, complete cds}	{NA}
transcript_HQ_SAB_transcript30692/f3p0/809	-2.5125	8.2766e-10	2.072e-09	{ABE03629.1; plasma membrane major intrinsic protein [Salicornia bigelovii]}	{sp|Q39196|PIP14_ARATH; Probable Aquaporin PIP1-4 OS=Arabidopsis thaliana GN=PIP1.4 PE=1 SV=1}	{sbi:SORBI_04g037800; K09872 PIP Aquaporin PIP - -}	{At4g23400; KOG0223 Aquaporin (major intrinsic protein family) G Carbohydrate transport and metabolism ;}	{GO:0006810; transport; biological_process GO:0005215; NA GO:0016020; membrane; cellular_component}	{DQ451602.1; Salicornia bigelovii plasma membrane major intrinsic protein (PIP1) mRNA, complete cds}	{PF00230:Major intrinsic protein}
transcript_HQ_SAB_transcript30499/f5p0/773	1.2818	5.0952e-11	1.3492e-10	{KNA07362.1; hypothetical protein SOVF_172620 [Spinacia oleracea]}	{sp|Q9SYG1|HS174_ARATH; 17.4 kDa class III Heat shock protein OS=Arabidopsis thaliana GN=HSP17.4B PE=2 SV=1}	{pxb:103948590; K13993 HSP20 HSP20 family protein - ko04141; Genetic Information Processing; Folding, sorting and degradation; Protein processing in endoplasmic reticulum}	{At1g54050; KOG0710 Molecular chaperone (small heat-shock protein Hsp26/Hsp42) O Posttranslational modification, protein turnover, chaperones ;}	{GO:0016226; iron-sulfur cluster assembly; biological_process GO:0008199; ferric iron binding; molecular_function}	{NA}	{PF01491:Frataxin-like domain}
transcript_HQ_SAB_transcript30391/f10p0/824	2.7603	8.5401e-31	4.3031e-30	{KNA25886.1; hypothetical protein SOVF_002240 [Spinacia oleracea]}	{sp|P19036|HSP17_ARATH; 17.4 kDa class I Heat shock protein OS=Arabidopsis thaliana GN=HSP17.4A PE=1 SV=2}	{bvg:104905137; K13993 HSP20 HSP20 family protein - ko04141; Genetic Information Processing; Folding, sorting and degradation; Protein processing in endoplasmic reticulum}	{At3g46230; KOG0710 Molecular chaperone (small heat-shock protein Hsp26/Hsp42) O Posttranslational modification, protein turnover, chaperones ;}	{NA}	{XM_010682529.2; PREDICTED: Beta vulgaris subsp. vulgaris 17.8 kDa class I Heat shock protein (LOC104895886), mRNA}	{NA}
transcript_HQ_SAB_transcript30386/f11p0/828	1.3027	1.3997e-11	3.8084e-11	{XP_010680967.1; PREDICTED: abscisic stress-ripening protein 2 [Beta vulgaris subsp. vulgaris]}	{NA}	{bvg:104895999; - - - - -}	{NA}	{GO:0006950; response to stress; biological_process}	{FR727443.1; Solanum peruvianum partial asr2 gene, allele 254a, exons 1-2}	{PF02496:ABA/WDS induced protein}
transcript_HQ_SAB_transcript30336/f27p0/810	1.1109	1.432e-16	4.7366e-16	{KNA25886.1; hypothetical protein SOVF_002240 [Spinacia oleracea]}	{sp|P19037|HS181_ARATH; 18.1 kDa class I Heat shock protein OS=Arabidopsis thaliana GN=HSP18.1 PE=1 SV=1}	{bvg:104903994; K13993 HSP20 HSP20 family protein - ko04141; Genetic Information Processing; Folding, sorting and degradation; Protein processing in endoplasmic reticulum}	{At5g59720; KOG0710 Molecular chaperone (small heat-shock protein Hsp26/Hsp42) O Posttranslational modification, protein turnover, chaperones ;}	{NA}	{XM_010682529.2; PREDICTED: Beta vulgaris subsp. vulgaris 17.8 kDa class I Heat shock protein (LOC104895886), mRNA}	{NA}
transcript_HQ_SAB_transcript3013/f2p0/3257	-0.60904	0.00018645	0.00033411	{XP_010681165.1; PREDICTED: Heat shock protein 90-5, chloroplastic isoform X2 [Beta vulgaris subsp. vulgaris]}	{sp|Q9SIF2|HS905_ARATH; Heat shock protein 90-5, chloroplastic OS=Arabidopsis thaliana GN=HSP90-5 PE=1 SV=1}	{nnu:104600243; K09487 HSP90B, TRA1 Heat shock protein 90kDa beta - ko04141; Genetic Information Processing; Folding, sorting and degradation; Protein processing in endoplasmic reticulum | ko04151; Environmental Information Processing; Signal transduction; PI3K-Akt signaling pathway | ko04657; Organismal Systems; Immune system; IL-17 signaling pathway | ko04915; Organismal Systems; Endocrine syst…	{At2g04030; KOG0019 Molecular chaperone (HSP90 family) O Posttranslational modification, protein turnover, chaperones ;}	{GO:0005524; ATP binding; molecular_function GO:0006457; protein folding; biological_process GO:0006950; response to stress; biological_process GO:0051082; unfolded protein binding; molecular_function}	{XM_010682863.2; PREDICTED: Beta vulgaris subsp. vulgaris Heat shock protein 90-5, chloroplastic (LOC104896153), transcript variant X2, mRNA}	{PF00183:Hsp90 protein}
transcript_HQ_SAB_transcript29974/f5p0/875	6.915	4.2911e-258	2.7366e-256	{KNA14461.1; hypothetical protein SOVF_107430 [Spinacia oleracea]}	{sp|P05477|HSP21_SOYBN; 17.9 kDa class II Heat shock protein OS=Glycine max GN=HSP17.9-D PE=3 SV=1}	{bvg:104886590; K13993 HSP20 HSP20 family protein - ko04141; Genetic Information Processing; Folding, sorting and degradation; Protein processing in endoplasmic reticulum}	{At5g12020; KOG0710 Molecular chaperone (small heat-shock protein Hsp26/Hsp42) O Posttranslational modification, protein turnover, chaperones ;}	{NA}	{XM_011021081.1; PREDICTED: Populus euphratica 17.9 kDa class II Heat shock protein-like (LOC105122151), mRNA}	{NA}
transcript_HQ_SAB_transcript29914/f7p0/868	-0.68524	4.0857e-06	8.2979e-06	{KNA03631.1; hypothetical protein SOVF_207340 [Spinacia oleracea]}	{sp|P05478|HSP16_SOYBN; 18.5 kDa class I Heat shock protein OS=Glycine max GN=HSP18.5-C PE=3 SV=1}	{bvg:104894016; - - - - -}	{At1g07400; KOG0710 Molecular chaperone (small heat-shock protein Hsp26/Hsp42) O Posttranslational modification, protein turnover, chaperones ;}	{NA}	{NA}	{NA}
transcript_HQ_SAB_transcript29877/f5p0/887	2.7802	8.3419e-70	8.5722e-69	{XP_010669352.1; PREDICTED: 17.1 kDa class II Heat shock protein [Beta vulgaris subsp. vulgaris]}	{sp|P05477|HSP21_SOYBN; 17.9 kDa class II Heat shock protein OS=Glycine max GN=HSP17.9-D PE=3 SV=1}	{bvg:104886590; K13993 HSP20 HSP20 family protein - ko04141; Genetic Information Processing; Folding, sorting and degradation; Protein processing in endoplasmic reticulum}	{At5g12020; KOG0710 Molecular chaperone (small heat-shock protein Hsp26/Hsp42) O Posttranslational modification, protein turnover, chaperones ;}	{GO:0004252; serine-type endopeptidase activity; molecular_function GO:0016032; NA GO:0019082; viral protein processing; biological_process}	{XM_011021081.1; PREDICTED: Populus euphratica 17.9 kDa class II Heat shock protein-like (LOC105122151), mRNA}	{PF05579:Equine arteritis virus serine endopeptidase S32}
transcript_HQ_SAB_transcript29844/f2p0/891	1.6407	8.9111e-08	2.0044e-07	{XP_010674414.1; PREDICTED: small Heat shock protein, chloroplastic [Beta vulgaris subsp. vulgaris]}	{sp|P09887|HS22C_SOYBN; Small Heat shock protein, chloroplastic (Fragment) OS=Glycine max GN=HSP22 PE=2 SV=1}	{bvg:104890572; K13993 HSP20 HSP20 family protein - ko04141; Genetic Information Processing; Folding, sorting and degradation; Protein processing in endoplasmic reticulum}	{At4g27670; KOG0710 Molecular chaperone (small heat-shock protein Hsp26/Hsp42) O Posttranslational modification, protein turnover, chaperones ;}	{NA}	{NA}	{NA}
transcript_HQ_SAB_transcript29447/f2p0/921	1.2395	0.00059523	0.0010207	{AEF28143.1; chloroplast low molecular weight Heat shock protein HSP26.26m [Chenopodium album]}	{sp|P30222|HS22C_PETHY; Small Heat shock protein, chloroplastic OS=Petunia hybrida GN=HSP22 PE=2 SV=1}	{gra:105791240; K13993 HSP20 HSP20 family protein - ko04141; Genetic Information Processing; Folding, sorting and degradation; Protein processing in endoplasmic reticulum}	{At4g27670; KOG0710 Molecular chaperone (small heat-shock protein Hsp26/Hsp42) O Posttranslational modification, protein turnover, chaperones ;}	{NA}	{JX073659.1; Chenopodium album chloroplast small Heat shock protein (sHSP) mRNA, complete cds; nuclear gene for chloroplast product}	{NA}
transcript_HQ_SAB_transcript29178/f2p0/956	#NAME?	5.8461e-08	1.3295e-07	{KNA10776.1; hypothetical protein SOVF_141190 [Spinacia oleracea]}	{sp|Q9LHA8|MD37C_ARATH; Probable mediator of RNA polymerase II transcription subunit 37c OS=Arabidopsis thaliana GN=MED37C PE=1 SV=1}	{ppp:PHYPADRAFT_158543; K03283 HSPA1_8 heat shock 70kDa protein 1/8 - ko03040; Genetic Information Processing; Transcription; Spliceosome | ko04141; Genetic Information Processing; Folding, sorting and degradation; Protein processing in endoplasmic reticulum | ko04010; Environmental Information Processing; Signal transduction; MAPK signaling pathway | ko04144; Cellular Processes; Transport and ca…	{At3g12580; KOG0101 Molecular chaperones HSP70/HSC70, HSP70 superfamily O Posttranslational modification, protein turnover, chaperones ;}	{NA}	{XM_009607782.2; PREDICTED: Nicotiana tomentosiformis heat shock cognate 70 kDa protein 2-like (LOC104100529), mRNA}	{NA}
transcript_HQ_SAB_transcript29131/f6p0/943	0.49041	0.00094205	0.0015861	{XP_010669640.1; PREDICTED: uncharacterized protein LOC104886816 [Beta vulgaris subsp. vulgaris]}	{sp|O95433|AHSA1_HUMAN; Activator of 90 kDa Heat shock protein ATPase homolog 1 OS=Homo sapiens GN=AHSA1 PE=1 SV=1}	{bvg:104886816; - - - - -}	{At5g58110; KOG2936 Uncharacterized conserved protein S Function unknown ;}	{GO:0001671; ATPase activator activity; molecular_function GO:0051087; chaperone binding; molecular_function}	{NA}	{PF09229:Activator of Hsp90 ATPase, N-terminal}
transcript_HQ_SAB_transcript2910/f2p0/3305	-1.8327	1.1365e-05	2.2351e-05	{XP_001762521.1; predicted protein [Physcomitrella patens]}	{sp|P43286|PIP21_ARATH; Aquaporin PIP2-1 OS=Arabidopsis thaliana GN=PIP2-1 PE=1 SV=1}	{ppp:PHYPADRAFT_209703; K09872 PIP Aquaporin PIP - -}	{At3g53420; KOG0223 Aquaporin (major intrinsic protein family) G Carbohydrate transport and metabolism ;}	{GO:0016020; membrane; cellular_component GO:0006810; transport; biological_process GO:0005215; NA}	{XM_010685799.2; PREDICTED: Beta vulgaris subsp. vulgaris Aquaporin PIP2-1 (LOC104898695), mRNA}	{PF00230:Major intrinsic protein}
transcript_HQ_SAB_transcript29040/f2p0/966	1.1198	3.9472e-09	9.5794e-09	{XP_010674414.1; PREDICTED: small Heat shock protein, chloroplastic [Beta vulgaris subsp. vulgaris]}	{sp|P09887|HS22C_SOYBN; Small Heat shock protein, chloroplastic (Fragment) OS=Glycine max GN=HSP22 PE=2 SV=1}	{bvg:104890572; K13993 HSP20 HSP20 family protein - ko04141; Genetic Information Processing; Folding, sorting and degradation; Protein processing in endoplasmic reticulum}	{At4g27670; KOG0710 Molecular chaperone (small heat-shock protein Hsp26/Hsp42) O Posttranslational modification, protein turnover, chaperones ;}	{NA}	{XM_010676112.2; PREDICTED: Beta vulgaris subsp. vulgaris small Heat shock protein, chloroplastic (LOC104890572), mRNA}	{NA}
transcript_HQ_SAB_transcript29031/f3p0/966	1.9262	2.3941e-12	6.7504e-12	{XP_010695165.1; PREDICTED: small Heat shock protein, chloroplastic isoform X2 [Beta vulgaris subsp. vulgaris]}	{sp|P11890|HS23C_OXYRB; Small Heat shock protein, chloroplastic OS=Oxybasis rubra GN=HSP23 PE=2 SV=1}	{nnu:104598537; K13993 HSP20 HSP20 family protein - ko04141; Genetic Information Processing; Folding, sorting and degradation; Protein processing in endoplasmic reticulum}	{At4g25200; KOG0710 Molecular chaperone (small heat-shock protein Hsp26/Hsp42) O Posttranslational modification, protein turnover, chaperones ;}	{NA}	{NA}	{NA}
transcript_HQ_SAB_transcript29012/f2p0/965	Inf	1.4408e-66	1.4172e-65	{XP_010669640.1; PREDICTED: uncharacterized protein LOC104886816 [Beta vulgaris subsp. vulgaris]}	{sp|O95433|AHSA1_HUMAN; Activator of 90 kDa Heat shock protein ATPase homolog 1 OS=Homo sapiens GN=AHSA1 PE=1 SV=1}	{bvg:104886816; - - - - -}	{At5g58110; KOG2936 Uncharacterized conserved protein S Function unknown ;}	{GO:0001671; ATPase activator activity; molecular_function GO:0051087; chaperone binding; molecular_function}	{NA}	{PF09229:Activator of Hsp90 ATPase, N-terminal}
transcript_HQ_SAB_transcript28872/f2p0/988	0.32833	0.0077779	0.011866	{AGZ20206.1; abscisic acid stress ripening-related protein [Suaeda liaotungensis]}	{sp|Q08655|ASR1_SOLLC; Abscisic stress-ripening protein 1 OS=Solanum lycopersicum GN=ASR1 PE=2 SV=1}	{bvg:104895943; - - - - -}	{NA}	{GO:0006950; response to stress; biological_process}	{KC460335.1; Suaeda liaotungensis abscisic acid stress ripening-related protein (ASR) mRNA, complete cds}	{PF02496:ABA/WDS induced protein}
transcript_HQ_SAB_transcript28801/f4p0/990	3.481	6.7702e-29	3.2496e-28	{XP_010695165.1; PREDICTED: small Heat shock protein, chloroplastic isoform X2 [Beta vulgaris subsp. vulgaris]}	{sp|P11890|HS23C_OXYRB; Small Heat shock protein, chloroplastic OS=Oxybasis rubra GN=HSP23 PE=2 SV=1}	{nnu:104598537; K13993 HSP20 HSP20 family protein - ko04141; Genetic Information Processing; Folding, sorting and degradation; Protein processing in endoplasmic reticulum}	{At4g25200; KOG0710 Molecular chaperone (small heat-shock protein Hsp26/Hsp42) O Posttranslational modification, protein turnover, chaperones ;}	{NA}	{NA}	{NA}
transcript_HQ_SAB_transcript28179/f2p0/1045	Inf	5.2582e-150	1.2897e-148	{AGZ20206.1; abscisic acid stress ripening-related protein [Suaeda liaotungensis]}	{sp|Q08655|ASR1_SOLLC; Abscisic stress-ripening protein 1 OS=Solanum lycopersicum GN=ASR1 PE=2 SV=1}	{bvg:104895943; - - - - -}	{NA}	{GO:0003677; DNA binding; molecular_function GO:0008270; zinc ion binding; molecular_function GO:0006950; response to stress; biological_process}	{KC460335.1; Suaeda liaotungensis abscisic acid stress ripening-related protein (ASR) mRNA, complete cds}	{PF02496:ABA/WDS induced protein PF01754:A20-like zinc finger}
transcript_HQ_SAB_transcript27712/f11p0/1052	3.5706	2.831e-05	5.4079e-05	{AGZ20206.1; abscisic acid stress ripening-related protein [Suaeda liaotungensis]}	{sp|Q08655|ASR1_SOLLC; Abscisic stress-ripening protein 1 OS=Solanum lycopersicum GN=ASR1 PE=2 SV=1}	{bvg:104895943; - - - - -}	{NA}	{GO:0006950; response to stress; biological_process}	{KC460335.1; Suaeda liaotungensis abscisic acid stress ripening-related protein (ASR) mRNA, complete cds}	{PF02496:ABA/WDS induced protein}
transcript_HQ_SAB_transcript27643/f4p0/1085	1.7123	7.1255e-28	3.323e-27	{KNA22961.1; hypothetical protein SOVF_029150 [Spinacia oleracea]}	{sp|Q41951|TIP21_ARATH; Aquaporin TIP2-1 OS=Arabidopsis thaliana GN=TIP2-1 PE=1 SV=2}	{cit:102624065; K09873 TIP Aquaporin TIP - -}	{At3g16240; KOG0223 Aquaporin (major intrinsic protein family) G Carbohydrate transport and metabolism ;}	{GO:0016020; membrane; cellular_component GO:0006810; transport; biological_process GO:0005215; NA}	{AJ245953.1; Spinacia oleracea mRNA for delta tonoplast intrinsic protein (dtip gene)}	{PF00230:Major intrinsic protein}
transcript_HQ_SAB_transcript27443/f3p0/1109	13.663	2.835e-31	1.4431e-30	{XP_010680902.1; PREDICTED: glycine-rich cell wall structural protein 1.8 [Beta vulgaris subsp. vulgaris]}	{sp|P37219|ASR2_SOLLC; Abscisic stress-ripening protein 2 OS=Solanum lycopersicum GN=ASR2 PE=4 SV=1}	{bvg:104895948; - - - - -}	{NA}	{GO:0006950; response to stress; biological_process}	{XM_010682600.2; PREDICTED: Beta vulgaris subsp. vulgaris glycine-rich cell wall structural protein 1.8 (LOC104895948), mRNA}	{PF02496:ABA/WDS induced protein}
transcript_HQ_SAB_transcript26825/f2p0/1152	-0.51353	0.00041955	0.00072872	{KNA08168.1; hypothetical protein SOVF_165100 [Spinacia oleracea]}	{sp|P19243|HSP11_PEA; 18.1 kDa class I Heat shock protein OS=Pisum sativum GN=HSP18.1 PE=1 SV=1}	{vra:106765882; K13993 HSP20 HSP20 family protein - ko04141; Genetic Information Processing; Folding, sorting and degradation; Protein processing in endoplasmic reticulum}	{At3g46230; KOG0710 Molecular chaperone (small heat-shock protein Hsp26/Hsp42) O Posttranslational modification, protein turnover, chaperones ;}	{NA}	{NA}	{NA}
transcript_HQ_SAB_transcript26811/f4p0/1118	0.97168	1.8609e-16	6.122e-16	{XP_010680967.1; PREDICTED: abscisic stress-ripening protein 2 [Beta vulgaris subsp. vulgaris]}	{sp|Q08655|ASR1_SOLLC; Abscisic stress-ripening protein 1 OS=Solanum lycopersicum GN=ASR1 PE=2 SV=1}	{bvg:104895999; - - - - -}	{NA}	{GO:0006950; response to stress; biological_process}	{XM_007201237.1; Prunus persica hypothetical protein (PRUPE_ppa011853mg) mRNA, complete cds}	{PF02496:ABA/WDS induced protein}
transcript_HQ_SAB_transcript26527/f2p0/1179	-1.6613	4.792e-25	2.0686e-24	{AEZ67462.1; late embryogenesis abundant proteins, partial [Haloxylon ammodendron]}	{sp|Q39644|LEA5_CITSI; Late embryogenesis abundant protein Lea5 OS=Citrus sinensis GN=LEA5 PE=2 SV=1}	{crb:CARUB_v10006078mg; - - - - -}	{NA}	{GO:0006950; response to stress; biological_process}	{JQ277729.1; Haloxylon ammodendron late embryogenesis abundant proteins (LEA3) mRNA, partial cds}	{PF03242:Late embryogenesis abundant protein}
transcript_HQ_SAB_transcript26356/f14p0/1186	Inf	3.1653e-123	6.027e-122	{XP_010680902.1; PREDICTED: glycine-rich cell wall structural protein 1.8 [Beta vulgaris subsp. vulgaris]}	{sp|P37219|ASR2_SOLLC; Abscisic stress-ripening protein 2 OS=Solanum lycopersicum GN=ASR2 PE=4 SV=1}	{bvg:104895948; - - - - -}	{NA}	{GO:0006950; response to stress; biological_process}	{XM_010682600.2; PREDICTED: Beta vulgaris subsp. vulgaris glycine-rich cell wall structural protein 1.8 (LOC104895948), mRNA}	{PF02496:ABA/WDS induced protein}
transcript_HQ_SAB_transcript26226/f3p0/1206	-1.2731	0.0068935	0.010571	{XP_010665948.1; PREDICTED: Heat shock protein 90-6, mitochondrial [Beta vulgaris subsp. vulgaris]}	{sp|F4JFN3|HS906_ARATH; Heat shock protein 90-6, mitochondrial OS=Arabidopsis thaliana GN=HSP90-6 PE=2 SV=1}	{nnu:104594214; K09487 HSP90B, TRA1 Heat shock protein 90kDa beta - ko04141; Genetic Information Processing; Folding, sorting and degradation; Protein processing in endoplasmic reticulum | ko04151; Environmental Information Processing; Signal transduction; PI3K-Akt signaling pathway | ko04657; Organismal Systems; Immune system; IL-17 signaling pathway | ko04915; Organismal Systems; Endocrine syst…	{At3g07770; KOG0019 Molecular chaperone (HSP90 family) O Posttranslational modification, protein turnover, chaperones ;}	{GO:0005524; ATP binding; molecular_function GO:0006457; protein folding; biological_process GO:0006950; response to stress; biological_process GO:0051082; unfolded protein binding; molecular_function}	{XM_010667646.2; PREDICTED: Beta vulgaris subsp. vulgaris Heat shock protein 90-6, mitochondrial (LOC104883173), mRNA}	{PF00183:Hsp90 protein}
transcript_HQ_SAB_transcript26203/f2p0/1206	-1.313	1.9611e-12	5.5471e-12	{AGZ20206.1; abscisic acid stress ripening-related protein [Suaeda liaotungensis]}	{sp|Q08655|ASR1_SOLLC; Abscisic stress-ripening protein 1 OS=Solanum lycopersicum GN=ASR1 PE=2 SV=1}	{bvg:104895943; - - - - -}	{NA}	{GO:0006950; response to stress; biological_process}	{KC460335.1; Suaeda liaotungensis abscisic acid stress ripening-related protein (ASR) mRNA, complete cds}	{PF02496:ABA/WDS induced protein}
transcript_HQ_SAB_transcript26064/f18p0/1165	0.66659	0.0039808	0.0062746	{XP_010680902.1; PREDICTED: glycine-rich cell wall structural protein 1.8 [Beta vulgaris subsp. vulgaris]}	{sp|P37220|ASR3_SOLLC; Abscisic stress-ripening protein 3 OS=Solanum lycopersicum GN=ASR3 PE=4 SV=2}	{bvg:104895948; - - - - -}	{NA}	{GO:0006950; response to stress; biological_process}	{XM_010682600.2; PREDICTED: Beta vulgaris subsp. vulgaris glycine-rich cell wall structural protein 1.8 (LOC104895948), mRNA}	{PF02496:ABA/WDS induced protein}
transcript_HQ_SAB_transcript26062/f6p0/1213	-0.70676	1.4617e-07	3.2427e-07	{AJK93570.1; tonoplast intrinsic protein [Suaeda glauca]}	{sp|P50156|TIP11_ORYSJ; Probable Aquaporin TIP1-1 OS=Oryza sativa subsp. japonica GN=TIP1-1 PE=2 SV=1}	{nnu:104594630; K09873 TIP Aquaporin TIP - -}	{At4g01470; KOG0223 Aquaporin (major intrinsic protein family) G Carbohydrate transport and metabolism ;}	{GO:0016020; membrane; cellular_component GO:0005215; NA GO:0006810; transport; biological_process}	{KP006434.1; Suaeda glauca tonoplast intrinsic protein mRNA, complete cds}	{PF00230:Major intrinsic protein}
transcript_HQ_SAB_transcript25837/f4p0/1227	-0.96039	2.2832e-10	5.8797e-10	{XP_010691608.1; PREDICTED: Aquaporin NIP6-1 [Beta vulgaris subsp. vulgaris]}	{sp|Q9SAI4|NIP61_ARATH; Aquaporin NIP6-1 OS=Arabidopsis thaliana GN=NIP6-1 PE=1 SV=1}	{cit:102629705; K09874 NIP Aquaporin NIP - -}	{At1g80760; KOG0223 Aquaporin (major intrinsic protein family) G Carbohydrate transport and metabolism ;}	{GO:0006810; transport; biological_process GO:0005215; NA GO:0016020; membrane; cellular_component}	{XM_010693306.2; PREDICTED: Beta vulgaris subsp. vulgaris Aquaporin NIP6-1 (LOC104904889), mRNA}	{PF00230:Major intrinsic protein}
transcript_HQ_SAB_transcript25505/f3p0/1266	-0.44165	0.0021751	0.003525	{ABE03629.1; plasma membrane major intrinsic protein [Salicornia bigelovii]}	{sp|Q39196|PIP14_ARATH; Probable Aquaporin PIP1-4 OS=Arabidopsis thaliana GN=PIP1.4 PE=1 SV=1}	{sot:102598096; K09872 PIP Aquaporin PIP - -}	{At1g01620; KOG0223 Aquaporin (major intrinsic protein family) G Carbohydrate transport and metabolism ;}	{GO:0006810; transport; biological_process GO:0005215; NA GO:0016020; membrane; cellular_component}	{DQ451602.1; Salicornia bigelovii plasma membrane major intrinsic protein (PIP1) mRNA, complete cds}	{PF00230:Major intrinsic protein}
transcript_HQ_SAB_transcript25501/f2p0/1263	Inf	6.3887e-174	1.9333e-172	{AEY75254.1; Aquaporin [Atriplex canescens]}	{sp|P42767|PIP1_ATRCA; Aquaporin PIP-type OS=Atriplex canescens PE=2 SV=1}	{thj:104804325; K09872 PIP Aquaporin PIP - -}	{At4g35100; KOG0223 Aquaporin (major intrinsic protein family) G Carbohydrate transport and metabolism ;}	{GO:0005215; NA GO:0006810; transport; biological_process GO:0016020; membrane; cellular_component}	{U18403.1; Atriplex canescens Aquaporin mRNA, complete cds}	{PF00230:Major intrinsic protein}
transcript_HQ_SAB_transcript25465/f5p0/1255	-4.5375	3.3793e-130	6.8955e-129	{ABE03629.1; plasma membrane major intrinsic protein [Salicornia bigelovii]}	{sp|Q39196|PIP14_ARATH; Probable Aquaporin PIP1-4 OS=Arabidopsis thaliana GN=PIP1.4 PE=1 SV=1}	{sot:102598096; K09872 PIP Aquaporin PIP - -}	{At1g01620; KOG0223 Aquaporin (major intrinsic protein family) G Carbohydrate transport and metabolism ;}	{GO:0016020; membrane; cellular_component GO:0006810; transport; biological_process GO:0005215; NA}	{DQ451602.1; Salicornia bigelovii plasma membrane major intrinsic protein (PIP1) mRNA, complete cds}	{PF00230:Major intrinsic protein}
transcript_HQ_SAB_transcript25207/f2p0/1286	-1.8339	9.4932e-40	5.8464e-39	{AEZ67462.1; late embryogenesis abundant proteins, partial [Haloxylon ammodendron]}	{sp|Q39644|LEA5_CITSI; Late embryogenesis abundant protein Lea5 OS=Citrus sinensis GN=LEA5 PE=2 SV=1}	{nnu:104598918; - - - - -}	{NA}	{GO:0006950; response to stress; biological_process}	{JQ277729.1; Haloxylon ammodendron late embryogenesis abundant proteins (LEA3) mRNA, partial cds}	{PF03242:Late embryogenesis abundant protein}
transcript_HQ_SAB_transcript24991/f2p0/1300	-0.85028	2.6301e-06	5.4143e-06	{AEZ67462.1; late embryogenesis abundant proteins, partial [Haloxylon ammodendron]}	{sp|Q39644|LEA5_CITSI; Late embryogenesis abundant protein Lea5 OS=Citrus sinensis GN=LEA5 PE=2 SV=1}	{nnu:104598918; - - - - -}	{NA}	{GO:0006950; response to stress; biological_process}	{JQ277729.1; Haloxylon ammodendron late embryogenesis abundant proteins (LEA3) mRNA, partial cds}	{PF03242:Late embryogenesis abundant protein}
transcript_HQ_SAB_transcript24862/f5p0/1310	-2.3291	1.0357e-32	5.4579e-32	{XP_002534417.1; PREDICTED: Aquaporin NIP2-1 isoform X1 [Ricinus communis]}	{sp|Q19KC1|NIP21_MAIZE; Aquaporin NIP2-1 OS=Zea mays GN=NIP2-1 PE=2 SV=2}	{rcu:8261018; K09874 NIP Aquaporin NIP - -}	{At5g37820; KOG0223 Aquaporin (major intrinsic protein family) G Carbohydrate transport and metabolism ;}	{GO:0016020; membrane; cellular_component GO:0005215; NA GO:0006810; transport; biological_process}	{XM_006431088.1; Citrus clementina hypothetical protein (CICLE_v10012382mg) mRNA, complete cds}	{PF00230:Major intrinsic protein}
transcript_HQ_SAB_transcript24860/f44p0/1237	-4.1847	1.4041e-150	3.4679e-149	{ABE03629.1; plasma membrane major intrinsic protein [Salicornia bigelovii]}	{sp|Q39196|PIP14_ARATH; Probable Aquaporin PIP1-4 OS=Arabidopsis thaliana GN=PIP1.4 PE=1 SV=1}	{sot:102598096; K09872 PIP Aquaporin PIP - -}	{At1g01620; KOG0223 Aquaporin (major intrinsic protein family) G Carbohydrate transport and metabolism ;}	{GO:0006810; transport; biological_process GO:0005215; NA GO:0016020; membrane; cellular_component}	{DQ451602.1; Salicornia bigelovii plasma membrane major intrinsic protein (PIP1) mRNA, complete cds}	{PF00230:Major intrinsic protein}
transcript_HQ_SAB_transcript24804/f4p0/1254	Inf	2.792e-118	5.0166e-117	{XP_010680902.1; PREDICTED: glycine-rich cell wall structural protein 1.8 [Beta vulgaris subsp. vulgaris]}	{sp|Q08655|ASR1_SOLLC; Abscisic stress-ripening protein 1 OS=Solanum lycopersicum GN=ASR1 PE=2 SV=1}	{bvg:104895948; - - - - -}	{NA}	{GO:0006950; response to stress; biological_process}	{KC460335.1; Suaeda liaotungensis abscisic acid stress ripening-related protein (ASR) mRNA, complete cds}	{PF02496:ABA/WDS induced protein}
transcript_HQ_SAB_transcript24491/f3p0/1319	-2.3764	2.2978e-58	1.9858e-57	{AEY75254.1; Aquaporin [Atriplex canescens]}	{sp|P42767|PIP1_ATRCA; Aquaporin PIP-type OS=Atriplex canescens PE=2 SV=1}	{thj:104804325; K09872 PIP Aquaporin PIP - -}	{At4g35100; KOG0223 Aquaporin (major intrinsic protein family) G Carbohydrate transport and metabolism ;}	{GO:0005215; NA GO:0006810; transport; biological_process GO:0016020; membrane; cellular_component}	{U18403.1; Atriplex canescens Aquaporin mRNA, complete cds}	{PF00230:Major intrinsic protein}
transcript_HQ_SAB_transcript24416/f2p0/1353	-2.7119	8.1469e-21	3.0898e-20	{XP_010665679.1; PREDICTED: Aquaporin NIP1-1 isoform X1 [Beta vulgaris subsp. vulgaris]}	{sp|Q8LFP7|NIP12_ARATH; Aquaporin NIP1-2 OS=Arabidopsis thaliana GN=NIP1-2 PE=2 SV=2}	{vvi:100263543; K09874 NIP Aquaporin NIP - -}	{At4g18910; KOG0223 Aquaporin (major intrinsic protein family) G Carbohydrate transport and metabolism ;}	{GO:0016020; membrane; cellular_component GO:0005215; NA GO:0006810; transport; biological_process}	{XM_006358022.2; PREDICTED: Solanum tuberosum Aquaporin NIP1-1-like (LOC102591600), mRNA}	{PF00230:Major intrinsic protein}
transcript_HQ_SAB_transcript24315/f3p0/1340	1.0817	4.6271e-12	1.2855e-11	{XP_020085019.1; Heat shock protein 83-like [Ananas comosus]}	{sp|P36182|HSP82_TOBAC; Heat shock protein 82 (Fragment) OS=Nicotiana tabacum GN=HSP82 PE=2 SV=1}	{bvg:104888372; K04079 HSP90A, htpG molecular chaperone HtpG - ko04141; Genetic Information Processing; Folding, sorting and degradation; Protein processing in endoplasmic reticulum | ko04151; Environmental Information Processing; Signal transduction; PI3K-Akt signaling pathway | ko04621; Organismal Systems; Immune system; NOD-like receptor signaling pathway | ko04612; Organismal Systems; Immune …	{At5g52640; KOG0019 Molecular chaperone (HSP90 family) O Posttranslational modification, protein turnover, chaperones ;}	{GO:0051082; unfolded protein binding; molecular_function GO:0006950; response to stress; biological_process GO:0005524; ATP binding; molecular_function GO:0008289; lipid binding; molecular_function GO:0006457; protein folding; biological_process}	{XM_010673323.2; PREDICTED: Beta vulgaris subsp. vulgaris Heat shock protein 83 (LOC104888372), mRNA}	{PF05823:Nematode fatty acid retinoid binding protein (Gp-FAR-1) PF00183:Hsp90 protein}
transcript_HQ_SAB_transcript24211/f6p0/1343	-0.32953	0.024291	0.034885	{KMT02066.1; hypothetical protein BVRB_9g207950 [Beta vulgaris subsp. vulgaris]}	{sp|Q9ATM4|PIP27_MAIZE; Aquaporin PIP2-7 OS=Zea mays GN=PIP2-7 PE=2 SV=1}	{rcu:8264070; K09872 PIP Aquaporin PIP - -}	{At3g53420; KOG0223 Aquaporin (major intrinsic protein family) G Carbohydrate transport and metabolism ;}	{GO:0006810; transport; biological_process GO:0005215; NA GO:0016020; membrane; cellular_component}	{U60147.1; Beta vulgaris plasma membrane major intrinsic protein 1 mRNA, complete cds}	{PF00230:Major intrinsic protein}
transcript_HQ_SAB_transcript23702/f2p0/1401	-2.4435	1.3704e-68	1.3882e-67	{XP_010684101.1; PREDICTED: Aquaporin PIP2-1 [Beta vulgaris subsp. vulgaris]}	{sp|P43286|PIP21_ARATH; Aquaporin PIP2-1 OS=Arabidopsis thaliana GN=PIP2-1 PE=1 SV=1}	{mdm:103450053; K09872 PIP Aquaporin PIP - -}	{At3g53420; KOG0223 Aquaporin (major intrinsic protein family) G Carbohydrate transport and metabolism ;}	{GO:0005215; NA GO:0006810; transport; biological_process GO:0016020; membrane; cellular_component}	{XM_010685799.2; PREDICTED: Beta vulgaris subsp. vulgaris Aquaporin PIP2-1 (LOC104898695), mRNA}	{PF00230:Major intrinsic protein}
transcript_HQ_SAB_transcript21603/f2p0/1513	11.221	4.7637e-121	8.8266e-120	{AGZ20206.1; abscisic acid stress ripening-related protein [Suaeda liaotungensis]}	{sp|Q08655|ASR1_SOLLC; Abscisic stress-ripening protein 1 OS=Solanum lycopersicum GN=ASR1 PE=2 SV=1}	{bvg:104895948; - - - - -}	{NA}	{NA}	{KC460335.1; Suaeda liaotungensis abscisic acid stress ripening-related protein (ASR) mRNA, complete cds}	{NA}
transcript_HQ_SAB_transcript16535/f5p0/1827	-2.7429	9.1404e-66	8.9004e-65	{XP_010680950.1; PREDICTED: probable Aquaporin NIP5-1 [Beta vulgaris subsp. vulgaris]}	{sp|Q9SV84|NIP51_ARATH; Probable Aquaporin NIP5-1 OS=Arabidopsis thaliana GN=NIP5-1 PE=2 SV=1}	{thj:104806473; K09874 NIP Aquaporin NIP - -}	{At4g10380; KOG0223 Aquaporin (major intrinsic protein family) G Carbohydrate transport and metabolism ;}	{GO:0016020; membrane; cellular_component GO:0006810; transport; biological_process GO:0005215; NA}	{XM_010682648.1; PREDICTED: Beta vulgaris subsp. vulgaris probable Aquaporin NIP5-1 (LOC104895986), mRNA}	{PF00230:Major intrinsic protein}
transcript_HQ_SAB_transcript16436/f12p0/1783	-1.5599	7.8364e-19	2.7931e-18	{XP_020085019.1; Heat shock protein 83-like [Ananas comosus]}	{sp|P36182|HSP82_TOBAC; Heat shock protein 82 (Fragment) OS=Nicotiana tabacum GN=HSP82 PE=2 SV=1}	{bvg:104888372; K04079 HSP90A, htpG molecular chaperone HtpG - ko04141; Genetic Information Processing; Folding, sorting and degradation; Protein processing in endoplasmic reticulum | ko04151; Environmental Information Processing; Signal transduction; PI3K-Akt signaling pathway | ko04621; Organismal Systems; Immune system; NOD-like receptor signaling pathway | ko04612; Organismal Systems; Immune …	{At5g52640; KOG0019 Molecular chaperone (HSP90 family) O Posttranslational modification, protein turnover, chaperones ;}	{GO:0006950; response to stress; biological_process GO:0051082; unfolded protein binding; molecular_function GO:0006457; protein folding; biological_process GO:0005524; ATP binding; molecular_function}	{XM_010673323.2; PREDICTED: Beta vulgaris subsp. vulgaris Heat shock protein 83 (LOC104888372), mRNA}	{PF00183:Hsp90 protein}
transcript_HQ_SAB_transcript16283/f2p0/1831	4.5212	1.4181e-06	2.9646e-06	{KNA11094.1; hypothetical protein SOVF_138350 [Spinacia oleracea]}	{sp|Q9SKP0|ECP63_ARATH; Late embryogenesis abundant protein ECP63 OS=Arabidopsis thaliana GN=ECP63 PE=2 SV=1}	{eus:EUTSA_v10017525mg; - - - - -}	{NA}	{NA}	{XM_010685628.2; PREDICTED: Beta vulgaris subsp. vulgaris embryonic protein DC-8 (LOC104898537), mRNA}	{NA}
transcript_HQ_SAB_transcript15263/f2p0/1907	2.309	3.4233e-19	1.2354e-18	{XP_010680950.1; PREDICTED: probable Aquaporin NIP5-1 [Beta vulgaris subsp. vulgaris]}	{sp|Q9SV84|NIP51_ARATH; Probable Aquaporin NIP5-1 OS=Arabidopsis thaliana GN=NIP5-1 PE=2 SV=1}	{thj:104806473; K09874 NIP Aquaporin NIP - -}	{At4g10380; KOG0223 Aquaporin (major intrinsic protein family) G Carbohydrate transport and metabolism ;}	{GO:0016020; membrane; cellular_component GO:0006810; transport; biological_process GO:0005215; NA}	{XM_010682648.1; PREDICTED: Beta vulgaris subsp. vulgaris probable Aquaporin NIP5-1 (LOC104895986), mRNA}	{PF00230:Major intrinsic protein}
transcript_HQ_SAB_transcript14842/f3p0/1796	-2.4212	1.6816e-31	8.6131e-31	{XP_010680950.1; PREDICTED: probable Aquaporin NIP5-1 [Beta vulgaris subsp. vulgaris]}	{sp|Q9SV84|NIP51_ARATH; Probable Aquaporin NIP5-1 OS=Arabidopsis thaliana GN=NIP5-1 PE=2 SV=1}	{thj:104806473; K09874 NIP Aquaporin NIP - -}	{At4g10380; KOG0223 Aquaporin (major intrinsic protein family) G Carbohydrate transport and metabolism ;}	{GO:0006810; transport; biological_process GO:0005215; NA GO:0016020; membrane; cellular_component}	{XM_010682648.1; PREDICTED: Beta vulgaris subsp. vulgaris probable Aquaporin NIP5-1 (LOC104895986), mRNA}	{PF00230:Major intrinsic protein}
transcript_HQ_SAB_transcript14351/f3p0/1974	-0.89829	5.0606e-12	1.4043e-11	{XP_008355028.1; PREDICTED: Heat shock protein 90-2 [Malus domestica]}	{sp|P36181|HSP80_SOLLC; Heat shock cognate protein 80 OS=Solanum lycopersicum GN=HSC80 PE=2 SV=1}	{gra:105791396; K04079 HSP90A, htpG molecular chaperone HtpG - ko04141; Genetic Information Processing; Folding, sorting and degradation; Protein processing in endoplasmic reticulum | ko04151; Environmental Information Processing; Signal transduction; PI3K-Akt signaling pathway | ko04621; Organismal Systems; Immune system; NOD-like receptor signaling pathway | ko04612; Organismal Systems; Immune …	{At5g56030; KOG0019 Molecular chaperone (HSP90 family) O Posttranslational modification, protein turnover, chaperones ;}	{GO:0006950; response to stress; biological_process GO:0051082; unfolded protein binding; molecular_function GO:0016021; integral to membrane; cellular_component GO:0006457; protein folding; biological_process GO:0006810; transport; biological_process GO:0005524; ATP binding; molecular_function}	{XM_010677671.2; PREDICTED: Beta vulgaris subsp. vulgaris heat shock cognate protein 80 (LOC104891886), mRNA}	{PF00183:Hsp90 protein PF13897:Golgi-dynamics membrane-trafficking}
transcript_HQ_SAB_transcript11619/f2p0/2156	-1.5717	3.9596e-09	9.6085e-09	{KNA13977.1; hypothetical protein SOVF_111670 [Spinacia oleracea]}	{sp|Q9SAB1|HSP7Q_ARATH; Heat shock 70 kDa protein 16 OS=Arabidopsis thaliana GN=HSP70-16 PE=2 SV=1}	{rcu:8282894; K09489 HSPA4 heat shock 70kDa protein 4 - ko04530; Cellular Processes; Cellular community - eukaryotes; Tight junction | ko04612; Organismal Systems; Immune system; Antigen processing and presentation}	{At1g11660; KOG0103 Molecular chaperones HSP105/HSP110/SSE1, HSP70 superfamily O Posttranslational modification, protein turnover, chaperones ;}	{NA}	{XM_010667267.2; PREDICTED: Beta vulgaris subsp. vulgaris heat shock 70 kDa protein 16 (LOC104882850), mRNA}	{NA}
transcript_HQ_SAB_transcript11102/f2p0/2207	-1.3688	6.2912e-05	0.00011698	{KNA11497.1; hypothetical protein SOVF_134690 [Spinacia oleracea]}	{sp|Q9SKY8|HSP7H_ARATH; Heat shock 70 kDa protein 8 OS=Arabidopsis thaliana GN=HSP70-8 PE=1 SV=1}	{jcu:105631975; K09489 HSPA4 heat shock 70kDa protein 4 - ko04530; Cellular Processes; Cellular community - eukaryotes; Tight junction | ko04612; Organismal Systems; Immune system; Antigen processing and presentation}	{At2g32120; KOG0101 Molecular chaperones HSP70/HSC70, HSP70 superfamily O Posttranslational modification, protein turnover, chaperones ;}	{NA}	{XM_010668631.2; PREDICTED: Beta vulgaris subsp. vulgaris heat shock 70 kDa protein 8 (LOC104884040), mRNA}	{NA}
transcript_HQ_BAB_transcript9711/f2p0/2605	4.1748	5.2529e-78	6.0858e-77	{XP_008355028.1; PREDICTED: Heat shock protein 90-2 [Malus domestica]}	{sp|P36181|HSP80_SOLLC; Heat shock cognate protein 80 OS=Solanum lycopersicum GN=HSC80 PE=2 SV=1}	{gra:105791396; K04079 HSP90A, htpG molecular chaperone HtpG - ko04141; Genetic Information Processing; Folding, sorting and degradation; Protein processing in endoplasmic reticulum | ko04151; Environmental Information Processing; Signal transduction; PI3K-Akt signaling pathway | ko04621; Organismal Systems; Immune system; NOD-like receptor signaling pathway | ko04612; Organismal Systems; Immune …	{At5g56030; KOG0019 Molecular chaperone (HSP90 family) O Posttranslational modification, protein turnover, chaperones ;}	{GO:0016021; integral to membrane; cellular_component GO:0006810; transport; biological_process GO:0005524; ATP binding; molecular_function GO:0051082; unfolded protein binding; molecular_function GO:0006457; protein folding; biological_process GO:0006950; response to stress; biological_process}	{KC181862.1; Salicornia europaea isolate xukai1015 Heat shock protein 90 mRNA, complete cds}	{PF13897:Golgi-dynamics membrane-trafficking PF00183:Hsp90 protein}
transcript_HQ_BAB_transcript9642/f2p0/2607	Inf	4.5798e-12	1.2725e-11	{XP_008355028.1; PREDICTED: Heat shock protein 90-2 [Malus domestica]}	{sp|P36181|HSP80_SOLLC; Heat shock cognate protein 80 OS=Solanum lycopersicum GN=HSC80 PE=2 SV=1}	{gra:105791396; K04079 HSP90A, htpG molecular chaperone HtpG - ko04141; Genetic Information Processing; Folding, sorting and degradation; Protein processing in endoplasmic reticulum | ko04151; Environmental Information Processing; Signal transduction; PI3K-Akt signaling pathway | ko04621; Organismal Systems; Immune system; NOD-like receptor signaling pathway | ko04612; Organismal Systems; Immune …	{At5g56030; KOG0019 Molecular chaperone (HSP90 family) O Posttranslational modification, protein turnover, chaperones ;}	{GO:0006457; protein folding; biological_process GO:0051082; unfolded protein binding; molecular_function GO:0006950; response to stress; biological_process GO:0016021; integral to membrane; cellular_component GO:0006810; transport; biological_process GO:0005524; ATP binding; molecular_function}	{KC181862.1; Salicornia europaea isolate xukai1015 Heat shock protein 90 mRNA, complete cds}	{PF00183:Hsp90 protein PF13897:Golgi-dynamics membrane-trafficking}
transcript_HQ_BAB_transcript9529/f3p0/2626	1.9232	1.4395e-23	5.937e-23	{XP_004250958.1; PREDICTED: heat shock cognate 70 kDa protein 2-like [Solanum lycopersicum]}	{sp|P27322|HSP72_SOLLC; Heat shock cognate 70 kDa protein 2 OS=Solanum lycopersicum GN=HSC-2 PE=2 SV=1}	{nta:107768506; - - - - -}	{At5g02500; KOG0101 Molecular chaperones HSP70/HSC70, HSP70 superfamily O Posttranslational modification, protein turnover, chaperones ;}	{GO:0005975; carbohydrate metabolic process; biological_process GO:0000902; cell morphogenesis; biological_process GO:0016773; phosphotransferase activity, alcohol group as acceptor; molecular_function GO:0030436; asexual sporulation; biological_process GO:0016787; hydrolase activity; molecular_function}	{AF033852.1; Spinacia oleracea cytosolic heat shock 70 protein (HSC70) mRNA, complete cds}	{PF02782:FGGY family of carbohydrate kinases, C-terminal domain PF01968:Hydantoinase/oxoprolinase PF14098:Small, acid-soluble spore protein I PF06723:MreB/Mbl protein}
transcript_HQ_BAB_transcript7718/f4p0/2849	-0.78116	6.3504e-08	1.441e-07	{XP_010681165.1; PREDICTED: Heat shock protein 90-5, chloroplastic isoform X2 [Beta vulgaris subsp. vulgaris]}	{sp|Q9SIF2|HS905_ARATH; Heat shock protein 90-5, chloroplastic OS=Arabidopsis thaliana GN=HSP90-5 PE=1 SV=1}	{nnu:104600243; K09487 HSP90B, TRA1 Heat shock protein 90kDa beta - ko04141; Genetic Information Processing; Folding, sorting and degradation; Protein processing in endoplasmic reticulum | ko04151; Environmental Information Processing; Signal transduction; PI3K-Akt signaling pathway | ko04657; Organismal Systems; Immune system; IL-17 signaling pathway | ko04915; Organismal Systems; Endocrine syst…	{At2g04030; KOG0019 Molecular chaperone (HSP90 family) O Posttranslational modification, protein turnover, chaperones ;}	{GO:0005524; ATP binding; molecular_function GO:0006950; response to stress; biological_process GO:0006457; protein folding; biological_process GO:0051082; unfolded protein binding; molecular_function}	{XM_010682862.2; PREDICTED: Beta vulgaris subsp. vulgaris Heat shock protein 90-5, chloroplastic (LOC104896153), transcript variant X1, mRNA}	{PF00183:Hsp90 protein}
transcript_HQ_BAB_transcript7490/f2p0/2881	0.81067	3.3727e-06	6.8872e-06	{KNA13977.1; hypothetical protein SOVF_111670 [Spinacia oleracea]}	{sp|Q9SAB1|HSP7Q_ARATH; Heat shock 70 kDa protein 16 OS=Arabidopsis thaliana GN=HSP70-16 PE=2 SV=1}	{rcu:8282894; K09489 HSPA4 heat shock 70kDa protein 4 - ko04530; Cellular Processes; Cellular community - eukaryotes; Tight junction | ko04612; Organismal Systems; Immune system; Antigen processing and presentation}	{At1g11660; KOG0103 Molecular chaperones HSP105/HSP110/SSE1, HSP70 superfamily O Posttranslational modification, protein turnover, chaperones ;}	{GO:0009246; enterobacterial common antigen biosynthetic process; biological_process GO:0016021; integral to membrane; cellular_component GO:0000902; cell morphogenesis; biological_process}	{XM_010667267.2; PREDICTED: Beta vulgaris subsp. vulgaris heat shock 70 kDa protein 16 (LOC104882850), mRNA}	{PF06899:WzyE protein, O-antigen assembly polymerase PF06723:MreB/Mbl protein}
transcript_HQ_BAB_transcript6729/f3p0/2976	4.0463	3.1228e-24	1.3167e-23	{XP_010665948.1; PREDICTED: Heat shock protein 90-6, mitochondrial [Beta vulgaris subsp. vulgaris]}	{sp|F4JFN3|HS906_ARATH; Heat shock protein 90-6, mitochondrial OS=Arabidopsis thaliana GN=HSP90-6 PE=2 SV=1}	{adu:107473808; K09487 HSP90B, TRA1 Heat shock protein 90kDa beta - ko04141; Genetic Information Processing; Folding, sorting and degradation; Protein processing in endoplasmic reticulum | ko04151; Environmental Information Processing; Signal transduction; PI3K-Akt signaling pathway | ko04657; Organismal Systems; Immune system; IL-17 signaling pathway | ko04915; Organismal Systems; Endocrine syst…	{At3g07770; KOG0019 Molecular chaperone (HSP90 family) O Posttranslational modification, protein turnover, chaperones ;}	{GO:0005524; ATP binding; molecular_function GO:0051082; unfolded protein binding; molecular_function GO:0006457; protein folding; biological_process GO:0006950; response to stress; biological_process}	{XM_010667646.2; PREDICTED: Beta vulgaris subsp. vulgaris Heat shock protein 90-6, mitochondrial (LOC104883173), mRNA}	{PF00183:Hsp90 protein}
transcript_HQ_BAB_transcript5451/f2p0/3206	1.3617	6.6837e-25	2.8725e-24	{KNA11575.1; hypothetical protein SOVF_133880 [Spinacia oleracea]}	{sp|Q9S7C0|HSP7O_ARATH; Heat shock 70 kDa protein 14 OS=Arabidopsis thaliana GN=HSP70-14 PE=2 SV=1}	{sot:102601134; K09489 HSPA4 heat shock 70kDa protein 4 - ko04530; Cellular Processes; Cellular community - eukaryotes; Tight junction | ko04612; Organismal Systems; Immune system; Antigen processing and presentation}	{At1g79930; KOG0103 Molecular chaperones HSP105/HSP110/SSE1, HSP70 superfamily O Posttranslational modification, protein turnover, chaperones ;}	{GO:0000902; cell morphogenesis; biological_process}	{XM_010692990.2; PREDICTED: Beta vulgaris subsp. vulgaris heat shock 70 kDa protein 15 (LOC104904660), mRNA}	{PF06723:MreB/Mbl protein}
transcript_HQ_BAB_transcript5381/f16p0/3185	5.9203	6.4831e-155	1.6647e-153	{XP_010449736.1; PREDICTED: heat shock 70 kDa protein 17 [Camelina sativa]}	{sp|F4JMJ1|HSP7R_ARATH; Heat shock 70 kDa protein 17 OS=Arabidopsis thaliana GN=HSP70-17 PE=2 SV=1}	{bvg:104894826; K09486 HYOU1 hypoxia up-regulated 1 - ko04141; Genetic Information Processing; Folding, sorting and degradation; Protein processing in endoplasmic reticulum}	{At4g16650_2; KOG0104 Molecular chaperones GRP170/SIL1, HSP70 superfamily O Posttranslational modification, protein turnover, chaperones ;}	{GO:0000746; conjugation; biological_process GO:0000902; cell morphogenesis; biological_process}	{XM_010681163.2; PREDICTED: Beta vulgaris subsp. vulgaris heat shock 70 kDa protein 17 (LOC104894826), mRNA}	{PF06723:MreB/Mbl protein PF06412:Conjugal transfer protein TraD}
transcript_HQ_BAB_transcript20602/f2p0/652	11.126	3.838e-40	2.3801e-39	{XP_010673239.1; PREDICTED: abscisic stress-ripening protein 1 [Beta vulgaris subsp. vulgaris]}	{sp|Q08655|ASR1_SOLLC; Abscisic stress-ripening protein 1 OS=Solanum lycopersicum GN=ASR1 PE=2 SV=1}	{bvg:104889661; - - - - -}	{NA}	{GO:0006950; response to stress; biological_process}	{XM_010674937.2; PREDICTED: Beta vulgaris subsp. vulgaris abscisic stress-ripening protein 1 (LOC104889661), mRNA}	{PF02496:ABA/WDS induced protein}
transcript_HQ_BAB_transcript20558/f2p0/797	16.332	0	0	{XP_010680967.1; PREDICTED: abscisic stress-ripening protein 2 [Beta vulgaris subsp. vulgaris]}	{sp|Q08655|ASR1_SOLLC; Abscisic stress-ripening protein 1 OS=Solanum lycopersicum GN=ASR1 PE=2 SV=1}	{bvg:104895999; - - - - -}	{NA}	{GO:0006950; response to stress; biological_process}	{XM_007201237.1; Prunus persica hypothetical protein (PRUPE_ppa011853mg) mRNA, complete cds}	{PF02496:ABA/WDS induced protein}
transcript_HQ_BAB_transcript20552/f26p0/799	10.885	0	0	{XP_010671173.1; PREDICTED: uncharacterized protein LOC104888047 [Beta vulgaris subsp. vulgaris]}	{NA}	{bvg:104888047; - - - - -}	{NA}	{GO:0006950; response to stress; biological_process}	{NA}	{PF03242:Late embryogenesis abundant protein}
transcript_HQ_BAB_transcript20551/f12p0/804	7.413	0	0	{AEZ67462.1; late embryogenesis abundant proteins, partial [Haloxylon ammodendron]}	{sp|Q39644|LEA5_CITSI; Late embryogenesis abundant protein Lea5 OS=Citrus sinensis GN=LEA5 PE=2 SV=1}	{nnu:104598918; - - - - -}	{NA}	{GO:0006950; response to stress; biological_process}	{JQ277729.1; Haloxylon ammodendron late embryogenesis abundant proteins (LEA3) mRNA, partial cds}	{PF03242:Late embryogenesis abundant protein}
transcript_HQ_BAB_transcript20431/f3p0/980	2.2315	0.00046521	0.00080528	{XP_010680902.1; PREDICTED: glycine-rich cell wall structural protein 1.8 [Beta vulgaris subsp. vulgaris]}	{sp|P37219|ASR2_SOLLC; Abscisic stress-ripening protein 2 OS=Solanum lycopersicum GN=ASR2 PE=4 SV=1}	{bvg:104895948; - - - - -}	{NA}	{GO:0006950; response to stress; biological_process}	{XM_010682600.2; PREDICTED: Beta vulgaris subsp. vulgaris glycine-rich cell wall structural protein 1.8 (LOC104895948), mRNA}	{PF02496:ABA/WDS induced protein}
transcript_HQ_BAB_transcript20383/f2p0/1054	1.368	9.6288e-24	3.992e-23	{AJK93570.1; tonoplast intrinsic protein [Suaeda glauca]}	{sp|P50156|TIP11_ORYSJ; Probable Aquaporin TIP1-1 OS=Oryza sativa subsp. japonica GN=TIP1-1 PE=2 SV=1}	{nnu:104594630; K09873 TIP Aquaporin TIP - -}	{At4g01470; KOG0223 Aquaporin (major intrinsic protein family) G Carbohydrate transport and metabolism ;}	{GO:0006810; transport; biological_process GO:0016020; membrane; cellular_component GO:0005215; NA}	{KP006434.1; Suaeda glauca tonoplast intrinsic protein mRNA, complete cds}	{PF00230:Major intrinsic protein}
transcript_HQ_BAB_transcript20362/f5p0/1025	#NAME?	6.1248e-05	0.00011396	{XP_010680902.1; PREDICTED: glycine-rich cell wall structural protein 1.8 [Beta vulgaris subsp. vulgaris]}	{sp|P37220|ASR3_SOLLC; Abscisic stress-ripening protein 3 OS=Solanum lycopersicum GN=ASR3 PE=4 SV=2}	{bvg:104895948; - - - - -}	{NA}	{GO:0006950; response to stress; biological_process}	{XM_010682600.2; PREDICTED: Beta vulgaris subsp. vulgaris glycine-rich cell wall structural protein 1.8 (LOC104895948), mRNA}	{PF02496:ABA/WDS induced protein}
transcript_HQ_BAB_transcript19964/f4p0/1263	8.087	1.4122e-289	1.3118e-287	{ABE03629.1; plasma membrane major intrinsic protein [Salicornia bigelovii]}	{sp|Q39196|PIP14_ARATH; Probable Aquaporin PIP1-4 OS=Arabidopsis thaliana GN=PIP1.4 PE=1 SV=1}	{sot:102598096; K09872 PIP Aquaporin PIP - -}	{At1g01620; KOG0223 Aquaporin (major intrinsic protein family) G Carbohydrate transport and metabolism ;}	{GO:0005215; NA GO:0016020; membrane; cellular_component GO:0006810; transport; biological_process}	{DQ451602.1; Salicornia bigelovii plasma membrane major intrinsic protein (PIP1) mRNA, complete cds}	{PF00230:Major intrinsic protein}
transcript_HQ_BAB_transcript19921/f2p0/1291	7.7831	2.4509e-144	5.6364e-143	{AEZ67462.1; late embryogenesis abundant proteins, partial [Haloxylon ammodendron]}	{sp|Q39644|LEA5_CITSI; Late embryogenesis abundant protein Lea5 OS=Citrus sinensis GN=LEA5 PE=2 SV=1}	{nnu:104598918; - - - - -}	{NA}	{GO:0006950; response to stress; biological_process}	{JQ277729.1; Haloxylon ammodendron late embryogenesis abundant proteins (LEA3) mRNA, partial cds}	{PF03242:Late embryogenesis abundant protein}
transcript_HQ_BAB_transcript19895/f4p0/1299	2.8543	2.8172e-32	1.4698e-31	{XP_010684101.1; PREDICTED: Aquaporin PIP2-1 [Beta vulgaris subsp. vulgaris]}	{sp|P43286|PIP21_ARATH; Aquaporin PIP2-1 OS=Arabidopsis thaliana GN=PIP2-1 PE=1 SV=1}	{mdm:103450053; K09872 PIP Aquaporin PIP - -}	{At3g53420; KOG0223 Aquaporin (major intrinsic protein family) G Carbohydrate transport and metabolism ;}	{GO:0005215; NA GO:0016020; membrane; cellular_component GO:0006810; transport; biological_process}	{XM_010685799.2; PREDICTED: Beta vulgaris subsp. vulgaris Aquaporin PIP2-1 (LOC104898695), mRNA}	{PF00230:Major intrinsic protein}
transcript_HQ_BAB_transcript19835/f3p0/1322	Inf	0	0	{XP_010680902.1; PREDICTED: glycine-rich cell wall structural protein 1.8 [Beta vulgaris subsp. vulgaris]}	{sp|Q08655|ASR1_SOLLC; Abscisic stress-ripening protein 1 OS=Solanum lycopersicum GN=ASR1 PE=2 SV=1}	{bvg:104895948; - - - - -}	{NA}	{GO:0006950; response to stress; biological_process}	{KC460335.1; Suaeda liaotungensis abscisic acid stress ripening-related protein (ASR) mRNA, complete cds}	{PF02496:ABA/WDS induced protein}
transcript_HQ_BAB_transcript18615/f3p0/1578	1.3393	8.8507e-06	1.7532e-05	{KNA18076.1; hypothetical protein SOVF_074170 [Spinacia oleracea]}	{sp|Q8N9S3|AHSA2_MOUSE; Activator of 90 kDa Heat shock protein ATPase homolog 2 OS=Mus musculus GN=Ahsa2 PE=1 SV=2}	{bvg:104889175; - - - - -}	{At3g12050; KOG2936 Uncharacterized conserved protein S Function unknown ;}	{GO:0001671; ATPase activator activity; molecular_function GO:0051087; chaperone binding; molecular_function GO:0006950; response to stress; biological_process}	{XM_010674331.2; PREDICTED: Beta vulgaris subsp. vulgaris activator of 90 kDa Heat shock protein ATPase homolog (LOC104889175), mRNA}	{PF09229:Activator of Hsp90 ATPase, N-terminal PF08327:Activator of Hsp90 ATPase homolog 1-like protein}
transcript_HQ_BAB_transcript16055/f2p0/1907	Inf	1.2234e-94	1.7355e-93	{XP_020085019.1; Heat shock protein 83-like [Ananas comosus]}	{sp|P36182|HSP82_TOBAC; Heat shock protein 82 (Fragment) OS=Nicotiana tabacum GN=HSP82 PE=2 SV=1}	{bvg:104888372; K04079 HSP90A, htpG molecular chaperone HtpG - ko04141; Genetic Information Processing; Folding, sorting and degradation; Protein processing in endoplasmic reticulum | ko04151; Environmental Information Processing; Signal transduction; PI3K-Akt signaling pathway | ko04621; Organismal Systems; Immune system; NOD-like receptor signaling pathway | ko04612; Organismal Systems; Immune …	{At5g52640; KOG0019 Molecular chaperone (HSP90 family) O Posttranslational modification, protein turnover, chaperones ;}	{GO:0051082; unfolded protein binding; molecular_function GO:0006457; protein folding; biological_process GO:0006950; response to stress; biological_process GO:0005524; ATP binding; molecular_function}	{XM_010673323.2; PREDICTED: Beta vulgaris subsp. vulgaris Heat shock protein 83 (LOC104888372), mRNA}	{PF00183:Hsp90 protein}
transcript_HQ_BAB_transcript13669/f4p0/2148	7.7001	0	0	{XP_015058100.1; PREDICTED: heat shock cognate 70 kDa protein 2-like [Solanum pennellii]}	{sp|P27322|HSP72_SOLLC; Heat shock cognate 70 kDa protein 2 OS=Solanum lycopersicum GN=HSC-2 PE=2 SV=1}	{nta:107768506; - - - - -}	{At5g02500; KOG0101 Molecular chaperones HSP70/HSC70, HSP70 superfamily O Posttranslational modification, protein turnover, chaperones ;}	{GO:0005975; carbohydrate metabolic process; biological_process GO:0000902; cell morphogenesis; biological_process GO:0016773; phosphotransferase activity, alcohol group as acceptor; molecular_function GO:0030436; asexual sporulation; biological_process GO:0016787; hydrolase activity; molecular_function}	{AF034617.1; Spinacia oleracea cytosolic heat shock 70 protein (HSC70-3alpha) gene, complete cds}	{PF02782:FGGY family of carbohydrate kinases, C-terminal domain PF01968:Hydantoinase/oxoprolinase PF06723:MreB/Mbl protein PF14098:Small, acid-soluble spore protein I}
transcript_HQ_BAB_transcript13642/f2p0/2151	0.47333	0.00078987	0.0013398	{XP_016681571.1; PREDICTED: probable mediator of RNA polymerase II transcription subunit 37c [Gossypium hirsutum]}	{sp|P27322|HSP72_SOLLC; Heat shock cognate 70 kDa protein 2 OS=Solanum lycopersicum GN=HSC-2 PE=2 SV=1}	{cmo:103490108; K03283 HSPA1_8 heat shock 70kDa protein 1/8 - ko03040; Genetic Information Processing; Transcription; Spliceosome | ko04141; Genetic Information Processing; Folding, sorting and degradation; Protein processing in endoplasmic reticulum | ko04010; Environmental Information Processing; Signal transduction; MAPK signaling pathway | ko04144; Cellular Processes; Transport and catabolism…	{At5g02500; KOG0101 Molecular chaperones HSP70/HSC70, HSP70 superfamily O Posttranslational modification, protein turnover, chaperones ;}	{GO:0005975; carbohydrate metabolic process; biological_process GO:0000902; cell morphogenesis; biological_process GO:0016773; phosphotransferase activity, alcohol group as acceptor; molecular_function}	{AF033852.1; Spinacia oleracea cytosolic heat shock 70 protein (HSC70) mRNA, complete cds}	{PF06723:MreB/Mbl protein PF02782:FGGY family of carbohydrate kinases, C-terminal domain}
transcript_HQ_BAB_transcript12816/f2p0/2238	1.9545	3.9682e-08	9.1069e-08	{XP_010678704.1; PREDICTED: heat shock cognate 70 kDa protein-like [Beta vulgaris subsp. vulgaris]}	{sp|P09189|HSP7C_PETHY; Heat shock cognate 70 kDa protein OS=Petunia hybrida GN=HSP70 PE=2 SV=1}	{bvg:104894215; K03283 HSPA1_8 heat shock 70kDa protein 1/8 - ko03040; Genetic Information Processing; Transcription; Spliceosome | ko04141; Genetic Information Processing; Folding, sorting and degradation; Protein processing in endoplasmic reticulum | ko04010; Environmental Information Processing; Signal transduction; MAPK signaling pathway | ko04144; Cellular Processes; Transport and catabolism…	{At3g12580; KOG0101 Molecular chaperones HSP70/HSC70, HSP70 superfamily O Posttranslational modification, protein turnover, chaperones ;}	{GO:0005975; carbohydrate metabolic process; biological_process GO:0000902; cell morphogenesis; biological_process GO:0016773; phosphotransferase activity, alcohol group as acceptor; molecular_function}	{XM_002527690.2; PREDICTED: Ricinus communis heat shock cognate 70 kDa protein 2 (LOC8279580), mRNA}	{PF02782:FGGY family of carbohydrate kinases, C-terminal domain PF06723:MreB/Mbl protein}
transcript_HQ_BAB_transcript12259/f15p0/2269	0.61725	1.1656e-06	2.448e-06	{AAA62445.1; Heat shock protein [Spinacia oleracea]}	{sp|P29357|HSP7E_SPIOL; Chloroplast envelope membrane 70 kDa heat shock-related protein OS=Spinacia oleracea GN=SCE70 PE=1 SV=3}	{bvg:104887018; K03283 HSPA1_8 heat shock 70kDa protein 1/8 - ko03040; Genetic Information Processing; Transcription; Spliceosome | ko04141; Genetic Information Processing; Folding, sorting and degradation; Protein processing in endoplasmic reticulum | ko04010; Environmental Information Processing; Signal transduction; MAPK signaling pathway | ko04144; Cellular Processes; Transport and catabolism…	{At3g12580; KOG0101 Molecular chaperones HSP70/HSC70, HSP70 superfamily O Posttranslational modification, protein turnover, chaperones ;}	{GO:0016787; hydrolase activity; molecular_function GO:0016773; phosphotransferase activity, alcohol group as acceptor; molecular_function GO:0005975; carbohydrate metabolic process; biological_process GO:0000902; cell morphogenesis; biological_process}	{L26243.1; Spinacia oleracea heat shock C70 protein mRNA, complete cds}	{PF06723:MreB/Mbl protein PF02782:FGGY family of carbohydrate kinases, C-terminal domain PF01968:Hydantoinase/oxoprolinase}
transcript_HQ_BAB_transcript11975/f3p0/2340	11.578	0	0	{EOY34079.1; Heat shock cognate protein 70-1 [Theobroma cacao]}	{sp|P27322|HSP72_SOLLC; Heat shock cognate 70 kDa protein 2 OS=Solanum lycopersicum GN=HSC-2 PE=2 SV=1}	{pda:103696725; K03283 HSPA1_8 heat shock 70kDa protein 1/8 - ko03040; Genetic Information Processing; Transcription; Spliceosome | ko04141; Genetic Information Processing; Folding, sorting and degradation; Protein processing in endoplasmic reticulum | ko04010; Environmental Information Processing; Signal transduction; MAPK signaling pathway | ko04144; Cellular Processes; Transport and catabolism…	{At3g12580; KOG0101 Molecular chaperones HSP70/HSC70, HSP70 superfamily O Posttranslational modification, protein turnover, chaperones ;}	{GO:0016773; phosphotransferase activity, alcohol group as acceptor; molecular_function GO:0000902; cell morphogenesis; biological_process GO:0005975; carbohydrate metabolic process; biological_process GO:0016787; hydrolase activity; molecular_function}	{XM_010687493.2; PREDICTED: Beta vulgaris subsp. vulgaris heat shock cognate 70 kDa protein 2 (LOC104900138), mRNA}	{PF02782:FGGY family of carbohydrate kinases, C-terminal domain PF01968:Hydantoinase/oxoprolinase PF06723:MreB/Mbl protein}
transcript_HQ_BAB_transcript11051/f2p0/2444	8.8493	0	0	{EOY34079.1; Heat shock cognate protein 70-1 [Theobroma cacao]}	{sp|P27322|HSP72_SOLLC; Heat shock cognate 70 kDa protein 2 OS=Solanum lycopersicum GN=HSC-2 PE=2 SV=1}	{pda:103696725; K03283 HSPA1_8 heat shock 70kDa protein 1/8 - ko03040; Genetic Information Processing; Transcription; Spliceosome | ko04141; Genetic Information Processing; Folding, sorting and degradation; Protein processing in endoplasmic reticulum | ko04010; Environmental Information Processing; Signal transduction; MAPK signaling pathway | ko04144; Cellular Processes; Transport and catabolism…	{At3g12580; KOG0101 Molecular chaperones HSP70/HSC70, HSP70 superfamily O Posttranslational modification, protein turnover, chaperones ;}	{GO:0016787; hydrolase activity; molecular_function GO:0016773; phosphotransferase activity, alcohol group as acceptor; molecular_function GO:0005975; carbohydrate metabolic process; biological_process GO:0000902; cell morphogenesis; biological_process}	{XM_010687493.2; PREDICTED: Beta vulgaris subsp. vulgaris heat shock cognate 70 kDa protein 2 (LOC104900138), mRNA}	{PF06723:MreB/Mbl protein PF01968:Hydantoinase/oxoprolinase PF02782:FGGY family of carbohydrate kinases, C-terminal domain}
transcript_HQ_BAB_transcript10670/f2p0/2485	6.966	3.0572e-12	8.559e-12	{EOY34079.1; Heat shock cognate protein 70-1 [Theobroma cacao]}	{sp|P27322|HSP72_SOLLC; Heat shock cognate 70 kDa protein 2 OS=Solanum lycopersicum GN=HSC-2 PE=2 SV=1}	{pda:103696725; K03283 HSPA1_8 heat shock 70kDa protein 1/8 - ko03040; Genetic Information Processing; Transcription; Spliceosome | ko04141; Genetic Information Processing; Folding, sorting and degradation; Protein processing in endoplasmic reticulum | ko04010; Environmental Information Processing; Signal transduction; MAPK signaling pathway | ko04144; Cellular Processes; Transport and catabolism…	{At3g12580; KOG0101 Molecular chaperones HSP70/HSC70, HSP70 superfamily O Posttranslational modification, protein turnover, chaperones ;}	{GO:0016773; phosphotransferase activity, alcohol group as acceptor; molecular_function GO:0005975; carbohydrate metabolic process; biological_process GO:0000902; cell morphogenesis; biological_process GO:0016787; hydrolase activity; molecular_function}	{XM_010687493.2; PREDICTED: Beta vulgaris subsp. vulgaris heat shock cognate 70 kDa protein 2 (LOC104900138), mRNA}	{PF06723:MreB/Mbl protein PF01968:Hydantoinase/oxoprolinase PF02782:FGGY family of carbohydrate kinases, C-terminal domain}
transcript_HQ_BAB_transcript10140/f3p0/2567	2.0047	5.8737e-39	3.57e-38	{AAB91473.1; heat shock 70 protein [Spinacia oleracea]}	{sp|Q01899|HSP7M_PHAVU; Heat shock 70 kDa protein, mitochondrial OS=Phaseolus vulgaris PE=2 SV=1}	{csv:101216102; K03283 HSPA1_8 heat shock 70kDa protein 1/8 - ko03040; Genetic Information Processing; Transcription; Spliceosome | ko04141; Genetic Information Processing; Folding, sorting and degradation; Protein processing in endoplasmic reticulum | ko04010; Environmental Information Processing; Signal transduction; MAPK signaling pathway | ko04144; Cellular Processes; Transport and catabolism…	{At5g09590; KOG0102 Molecular chaperones mortalin/PBP74/GRP75, HSP70 superfamily O Posttranslational modification, protein turnover, chaperones ;}	{GO:0016773; phosphotransferase activity, alcohol group as acceptor; molecular_function GO:0005525; GTP binding; molecular_function GO:0005975; carbohydrate metabolic process; biological_process GO:0000902; cell morphogenesis; biological_process}	{XM_010693161.2; PREDICTED: Beta vulgaris subsp. vulgaris heat shock 70 kDa protein, mitochondrial (LOC104904782), mRNA}	{PF01031:Dynamin central region PF02782:FGGY family of carbohydrate kinases, C-terminal domain PF06723:MreB/Mbl protein}
