# Supplementary material for: Characterization of the gene expression profile response to drought stress in Haloxylon using PacBio single-molecule real-time and Illumina sequencing
Source: Front Plant Sci. 2022 Aug 16;13:981029. doi: 10.3389/fpls.2022.981029 (PMC9424927; doi:10.3389/fpls.2022.981029)
Supplement: Supplementary file 9 [file Table_9.XLSX]

## Sheet: LS vs. HS
Table S9 DEGs related to glucose metabolism in Haloxylon ammodendron
Gene_id	log2FoldChange	pval	padj	{nr}	{SwissProt}	{KEGG}	{KOG}	{GO}	{nt}	{pfam}
transcript_HQ_BAB_transcript13381/f7p0/2157	-2.5546	0	0	{XP_019106732.1; PREDICTED: glucose-1-phosphate adenylyltransferase large subunit, chloroplastic/amyloplastic isoform X1 [Beta vulgaris subsp. vulgaris]}	{sp|P55233|GLGL1_BETVU; Glucose-1-phosphate adenylyltransferase large subunit, chloroplastic/amyloplastic OS=Beta vulgaris GN=AGPS1 PE=2 SV=1}	{pop:POPTR_0002s03480g; K00975 glgC glucose-1-phosphate adenylyltransferase 2.7.7.27 ko00500; Metabolism; Carbohydrate metabolism; Starch and sucrose metabolism | ko00520; Metabolism; Carbohydrate metabolism; Amino sugar and nucleotide sugar metabolism | ko02026; Cellular Processes; Cellular community - prokaryotes; Biofilm formation - Escherichia coli}	{At1g27680; KOG1322 GDP-mannose pyrophosphorylase/mannose-1-phosphate guanylyltransferase M Cell wall/membrane/envelope biogenesis ;}	{GO:0016779; nucleotidyltransferase activity; molecular_function GO:0009058; biosynthetic process; biological_process}	{XM_019251187.1; PREDICTED: Beta vulgaris subsp. vulgaris glucose-1-phosphate adenylyltransferase large subunit, chloroplastic/amyloplastic (LOC104889614), transcript variant X1, mRNA}	{PF00483:Nucleotidyl transferase}
transcript_HQ_SAB_transcript9867/f3p0/2266	0.43704	0.0012964	0.0029302	{XP_010687238.1; PREDICTED: putative 3,4-dihydroxy-2-butanone kinase isoform X1 [Beta vulgaris subsp. vulgaris]}	{sp|O04059|DHBK_SOLLC; Putative 3,4-dihydroxy-2-butanone kinase OS=Solanum lycopersicum GN=DHBK PE=2 SV=1}	{jcu:105628863; K00863 DAK, TKFC triose/dihydroxyacetone kinase / FAD-AMP lyase (cyclizing) [EC:2.7.1.28 2.7.1.29 4.6.1.15] 2.7.1.28,2.7.1.29,4.6.1.15 ko01200; Metabolism; Global and overview maps; Carbon metabolism | ko00051; Metabolism; Carbohydrate metabolism; Fructose and mannose metabolism | ko00680; Metabolism; Energy metabolism; Methane metabolism | ko00561; Metabolism; Lipid metabolism; G…	{At3g17770; KOG2426 Dihydroxyacetone kinase/glycerone kinase G Carbohydrate transport and metabolism ;}	{GO:0004371; glycerone kinase activity; molecular_function GO:0006071; glycerol metabolic process; biological_process}	{XM_010688936.2; PREDICTED: Beta vulgaris subsp. vulgaris putative 3,4-dihydroxy-2-butanone kinase (LOC104901368), transcript variant X1, mRNA}	{PF02733:Dak1 domain PF02734:DAK2 domain}
transcript_HQ_SAB_transcript9848/f2p0/2315	0.85298	7.1201e-05	0.00018875	{KNA18029.1; hypothetical protein SOVF_074550 [Spinacia oleracea]}	{sp|Q93Z24|BGA17_ARATH; Beta-galactosidase 17 OS=Arabidopsis thaliana GN=BGAL17 PE=2 SV=1}	{cit:102628668; K12309 GLB1, ELNR1 beta-galactosidase 3.2.1.23 ko00052; Metabolism; Carbohydrate metabolism; galactose metabolism | ko00600; Metabolism; Lipid metabolism; Sphingolipid metabolism | ko00531; Metabolism; Glycan biosynthesis and metabolism; Glycosaminoglycan degradation | ko00604; Metabolism; Glycan biosynthesis and metabolism; Glycosphingolipid biosynthesis - ganglio series | ko0051…	{At1g72990; KOG0496 Beta-galactosidase G Carbohydrate transport and metabolism ;}	{GO:0004565; beta-galactosidase activity; molecular_function GO:0005975; carbohydrate metabolic process; biological_process GO:0009341; beta-galactosidase complex; cellular_component}	{XM_010687085.2; PREDICTED: Beta vulgaris subsp. vulgaris beta-galactosidase 17 (LOC104899813), mRNA}	{PF02449:Beta-galactosidase}
transcript_HQ_SAB_transcript9548/f3p0/2340	1.0935	0.018432	0.034263	{KNA14594.1; hypothetical protein SOVF_105980 [Spinacia oleracea]}	{sp|Q9FLW9|PKP2_ARATH; Plastidial pyruvate kinase 2 OS=Arabidopsis thaliana GN=PKP2 PE=1 SV=1}	{bvg:104888326; K00873 PK, pyk pyruvate kinase 2.7.1.40 ko01200; Metabolism; Global and overview maps; Carbon metabolism | ko01230; Metabolism; Global and overview maps; Biosynthesis of amino acids | ko00010; Metabolism; Carbohydrate metabolism; Glycolysis / gluconeogenesis | ko00620; Metabolism; Carbohydrate metabolism; Pyruvate metabolism | ko00230; Metabolism; Nucleotide metabolism; Purine met…	{At5g52920; KOG2323 Pyruvate kinase G Carbohydrate transport and metabolism ;}	{GO:0000287; magnesium ion binding; molecular_function GO:0030955; potassium ion binding; molecular_function GO:0005975; carbohydrate metabolic process; biological_process GO:0006096; glycolysis; biological_process GO:0003824; NA GO:0004553; hydrolase activity, hydrolyzing O-glycosyl compounds; molecular_function GO:0004743; pyruvate kinase activity; molecular_function}	{XM_010673261.2; PREDICTED: Beta vulgaris subsp. vulgaris pyruvate kinase isozyme G, chloroplastic (LOC104888326), mRNA}	{PF00150:Cellulase (glycosyl hydrolase family 5) PF03328:HpcH/HpaI aldolase/citrate lyase family PF00224:Pyruvate kinase, barrel domain}
transcript_HQ_SAB_transcript9459/f3p0/2354	1.3584	2.4367e-23	1.8001e-22	{XP_010683420.1; PREDICTED: 2,3-bisphosphoglycerate-independent phosphoglycerate mutase [Beta vulgaris subsp. vulgaris]}	{sp|Q42908|PMGI_MESCR; 2,3-bisphosphoglycerate-independent phosphoglycerate mutase OS=Mesembryanthemum crystallinum GN=PGM1 PE=2 SV=1}	{bvg:104882799; K15633 gpmI 2,3-bisphosphoglycerate-independent phosphoglycerate mutase 5.4.2.12 ko01200; Metabolism; Global and overview maps; Carbon metabolism | ko01230; Metabolism; Global and overview maps; Biosynthesis of amino acids | ko00010; Metabolism; Carbohydrate metabolism; Glycolysis / gluconeogenesis | ko00680; Metabolism; Energy metabolism; Methane metabolism | ko00260; Metabolism;…	{At3g08590; KOG4513 Phosphoglycerate mutase G Carbohydrate transport and metabolism ;}	{GO:0004619; phosphoglycerate mutase activity; molecular_function GO:0006007; glucose catabolic process; biological_process GO:0046872; metal ion binding; molecular_function GO:0016791; phosphatase activity; molecular_function GO:0008152; NA GO:0003824; NA GO:0030145; manganese ion binding; molecular_function GO:0005737; cytoplasm; cellular_component}	{XM_019248139.1; PREDICTED: Beta vulgaris subsp. vulgaris 2,3-bisphosphoglycerate-independent phosphoglycerate mutase (LOC104882799), transcript variant X2, mRNA}	{PF01676:Metalloenzyme superfamily PF00245:Alkaline phosphatase PF06415:BPG-independent PGAM N-terminus (iPGM_N)}
transcript_HQ_SAB_transcript9366/f2p0/2360	1.7012	0.027424	0.04919	{AQK42732.1; Glucose-6-phosphate 1-dehydrogenase [Zea mays]}	{sp|Q43727|G6PD1_ARATH; Glucose-6-phosphate 1-dehydrogenase 1, chloroplastic OS=Arabidopsis thaliana GN=APG1 PE=2 SV=2}	{nnu:104592835; K00036 G6PD, zwf glucose-6-phosphate 1-dehydrogenase [EC:1.1.1.49 1.1.1.363] 1.1.1.49,1.1.1.363 ko01200; Metabolism; Global and overview maps; Carbon metabolism | ko00030; Metabolism; Carbohydrate metabolism; pentose phosphate pathway | ko00480; Metabolism; Metabolism of other amino acids; Glutathione metabolism | ko05230; Human Diseases; Cancers: Overview; Central carbon metaboli…	{At5g35790; KOG0563 Glucose-6-phosphate 1-dehydrogenase G Carbohydrate transport and metabolism ;}	{NA}	{XM_019344286.1; PREDICTED: Ipomoea nil glucose-6-phosphate 1-dehydrogenase, chloroplastic (LOC109193422), mRNA}	{NA}
transcript_HQ_SAB_transcript9352/f3p0/2334	0.30063	0.025864	0.046638	{KNA15843.1; hypothetical protein SOVF_094530 [Spinacia oleracea]}	{sp|A8MS68|PLPD1_ARATH; Dihydrolipoyl dehydrogenase 1, chloroplastic OS=Arabidopsis thaliana GN=LPD1 PE=2 SV=1}	{bvg:104888407; K00382 DLD, lpd, pdhD dihydrolipoamide dehydrogenase 1.8.1.4 ko01200; Metabolism; Global and overview maps; Carbon metabolism | ko00010; Metabolism; Carbohydrate metabolism; Glycolysis / gluconeogenesis | ko00020; Metabolism; Carbohydrate metabolism; Citrate cycle (TCA cycle) | ko00620; Metabolism; Carbohydrate metabolism; Pyruvate metabolism | ko00630; Metabolism; Carbohydrate me…	{At3g16950; KOG1335 Dihydrolipoamide dehydrogenase C Energy production and conversion ;}	{GO:0008033; tRNA processing; biological_process GO:0016491; oxidoreductase activity; molecular_function GO:0051287; NAD binding; molecular_function GO:0050660; flavin adenine dinucleotide binding; molecular_function GO:0055114; oxidation-reduction process; biological_process GO:0045454; cell redox homeostasis; biological_process GO:0003857; 3-hydroxyacyl-CoA dehydrogenase activity; molecular_fun…	{XM_010673370.2; PREDICTED: Beta vulgaris subsp. vulgaris dihydrolipoyl dehydrogenase 1, chloroplastic (LOC104888407), mRNA}	{PF00070:Pyridine nucleotide-disulphide oxidoreductase PF12831:FAD dependent oxidoreductase PF03721:UDP-glucose/GDP-mannose dehydrogenase family, NAD binding domain PF02852:Pyridine nucleotide-disulphide oxidoreductase, dimerisation domain PF07992:Pyridine nucleotide-disulphide oxidoreductase PF02737:3-hydroxyacyl-CoA dehydrogenase, NAD binding domain PF01134:Glucose inhibited division protein A …
transcript_HQ_SAB_transcript8986/f5p0/2385	-0.62219	0.016399	0.030795	{XP_010679655.1; PREDICTED: uncharacterized protein LOC104894964 [Beta vulgaris subsp. vulgaris]}	{sp|A7LXU3|BGH3B_BACO1; Beta-glucosidase BoGH3B OS=Bacteroides ovatus (strain ATCC 8483 / DSM 1896 / JCM 5824 / NCTC 11153) GN=BACOVA_02659 PE=1 SV=1}	{bvg:104894525; K05349 bglX beta-glucosidase 3.2.1.21 ko00500; Metabolism; Carbohydrate metabolism; Starch and sucrose metabolism | ko00460; Metabolism; Metabolism of other amino acids; Cyanoamino acid metabolism | ko00940; Metabolism; Biosynthesis of other secondary metabolites; Phenylpropanoid biosynthesis}	{NA}	{GO:0004553; hydrolase activity, hydrolyzing O-glycosyl compounds; molecular_function GO:0005975; carbohydrate metabolic process; biological_process}	{XM_010698323.2; PREDICTED: Beta vulgaris subsp. vulgaris beta-glucosidase BoGH3B (LOC104909120), transcript variant X2, mRNA}	{PF00933:Glycosyl hydrolase family 3 N terminal domain PF01915:Glycosyl hydrolase family 3 C-terminal domain}
transcript_HQ_SAB_transcript8812/f2p0/2418	0.77924	0.014926	0.028242	{XP_007204374.1; hypothetical protein PRUPE_ppa007357mg [Prunus persica]}	{sp|P93031|GMD2_ARATH; GDP-mannose 4,6 dehydratase 2 OS=Arabidopsis thaliana GN=MUR1 PE=1 SV=3}	{pper:PRUPE_ppa007357mg; K01711 gmd, GMDS GDPmannose 4,6-dehydratase 4.2.1.47 ko00051; Metabolism; Carbohydrate metabolism; Fructose and mannose metabolism | ko00520; Metabolism; Carbohydrate metabolism; Amino sugar and nucleotide sugar metabolism}	{At5g66280; KOG1372 GDP-mannose 4,6 dehydratase G Carbohydrate transport and metabolism ;}	{GO:0050662; coenzyme binding; molecular_function GO:0003824; NA}	{XM_010693633.2; PREDICTED: Beta vulgaris subsp. vulgaris GDP-mannose 4,6 dehydratase 1 (LOC104905183), mRNA}	{PF01370:NAD dependent epimerase/dehydratase family}
transcript_HQ_SAB_transcript8766/f2p0/2426	2.7208	5.4913e-55	8.4012e-54	{XP_010676931.1; PREDICTED: granule-bound starch synthase 1, chloroplastic/amyloplastic [Beta vulgaris subsp. vulgaris]}	{sp|O82627|SSG1_ANTMA; Granule-bound starch synthase 1, chloroplastic/amyloplastic OS=Antirrhinum majus GN=WAXY PE=2 SV=1}	{bvg:104892645; K13679 WAXY granule-bound starch synthase 2.4.1.242 ko00500; Metabolism; Carbohydrate metabolism; Starch and sucrose metabolism}	{NA}	{NA}	{XM_010678629.2; PREDICTED: Beta vulgaris subsp. vulgaris granule-bound starch synthase 1, chloroplastic/amyloplastic (LOC104892645), mRNA}	{NA}
transcript_HQ_SAB_transcript8661/f2p0/2451	-0.6835	0.00055773	0.0013222	{XP_010689405.1; PREDICTED: 6-phosphofructo-2-kinase/fructose-2,6-bisphosphatase [Beta vulgaris subsp. vulgaris]}	{sp|Q9MB58|F26_ARATH; 6-phosphofructo-2-kinase/fructose-2,6-bisphosphatase OS=Arabidopsis thaliana GN=FKFBP PE=1 SV=1}	{ini:109173792; K01103 PFKFB3 6-phosphofructo-2-kinase / fructose-2,6-biphosphatase 3&#160 2.7.1.105,3.1.3.46 ko00051; Metabolism; Carbohydrate metabolism; Fructose and mannose metabolism | ko04066; Environmental Information Processing; Signal transduction; HIF-1 signaling pathway | ko04152; Environmental Information Processing; Signal transduction; AMPK signaling pathway}	{At1g07110; KOG0234 Fructose-6-phosphate 2-kinase/fructose-2,6-biphosphatase G Carbohydrate transport and metabolism ;}	{GO:2001070; NA}	{XM_010691103.2; PREDICTED: Beta vulgaris subsp. vulgaris 6-phosphofructo-2-kinase/fructose-2,6-bisphosphatase (LOC104903114), mRNA}	{PF00686:Starch binding domain}
transcript_HQ_SAB_transcript8589/f4p0/2437	-1.2895	8.3042e-48	1.119e-46	{XP_010683064.1; PREDICTED: phosphoenolpyruvate carboxykinase [ATP] [Beta vulgaris subsp. vulgaris]}	{sp|Q9T074|PCKA_ARATH; Phosphoenolpyruvate carboxykinase (ATP) OS=Arabidopsis thaliana GN=PCKA PE=1 SV=1}	{pda:103708389; K01610 E4.1.1.49, pckA phosphoenolpyruvate carboxykinase (ATP) 4.1.1.49 ko01200; Metabolism; Global and overview maps; Carbon metabolism | ko00010; Metabolism; Carbohydrate metabolism; Glycolysis / gluconeogenesis | ko00020; Metabolism; Carbohydrate metabolism; Citrate cycle (TCA cycle) | ko00620; Metabolism; Carbohydrate metabolism; Pyruvate metabolism | ko00710; Metabolism; Ener…	{NA}	{GO:0006094; gluconeogenesis; biological_process GO:0004612; phosphoenolpyruvate carboxykinase (ATP) activity; molecular_function GO:0005524; ATP binding; molecular_function}	{XM_010684762.2; PREDICTED: Beta vulgaris subsp. vulgaris phosphoenolpyruvate carboxykinase [ATP] (LOC104897815), mRNA}	{PF01293:Phosphoenolpyruvate carboxykinase}
transcript_HQ_SAB_transcript8586/f2p0/2449	0.77837	1.3054e-08	4.8267e-08	{XP_010694376.1; PREDICTED: uncharacterized protein LOC104907184 [Beta vulgaris subsp. vulgaris]}	{sp|A7LXU3|BGH3B_BACO1; Beta-glucosidase BoGH3B OS=Bacteroides ovatus (strain ATCC 8483 / DSM 1896 / JCM 5824 / NCTC 11153) GN=BACOVA_02659 PE=1 SV=1}	{lang:109338466; K05349 bglX beta-glucosidase 3.2.1.21 ko00500; Metabolism; Carbohydrate metabolism; Starch and sucrose metabolism | ko00460; Metabolism; Metabolism of other amino acids; Cyanoamino acid metabolism | ko00940; Metabolism; Biosynthesis of other secondary metabolites; Phenylpropanoid biosynthesis; lang:109338466; - - - - -}	{NA}	{GO:0005975; carbohydrate metabolic process; biological_process GO:0004553; hydrolase activity, hydrolyzing O-glycosyl compounds; molecular_function}	{XM_010696075.2; PREDICTED: Beta vulgaris subsp. vulgaris beta-glucosidase BoGH3B (LOC104907184), transcript variant X2, mRNA}	{PF01915:Glycosyl hydrolase family 3 C-terminal domain PF00933:Glycosyl hydrolase family 3 N terminal domain}
transcript_HQ_SAB_transcript8490/f2p0/2450	-1.4426	1.6532e-15	9.0584e-15	{XP_010688341.1; PREDICTED: hexokinase-1 [Beta vulgaris subsp. vulgaris]}	{sp|Q9SEK3|HXK1_SPIOL; Hexokinase-1 OS=Spinacia oleracea GN=HXK1 PE=2 SV=1}	{pper:PRUPE_ppa004637mg; K00844 HK hexokinase 2.7.1.1 ko01200; Metabolism; Global and overview maps; Carbon metabolism | ko00010; Metabolism; Carbohydrate metabolism; Glycolysis / gluconeogenesis | ko00051; Metabolism; Carbohydrate metabolism; Fructose and mannose metabolism | ko00052; Metabolism; Carbohydrate metabolism; galactose metabolism | ko00500; Metabolism; Carbohydrate metabolism; Starch…	{At4g29130; KOG1369 Hexokinase G Carbohydrate transport and metabolism ;}	{GO:0050662; coenzyme binding; molecular_function GO:0005975; carbohydrate metabolic process; biological_process GO:0055114; oxidation-reduction process; biological_process GO:0015936; coenzyme A metabolic process; biological_process GO:0005524; ATP binding; molecular_function GO:0016773; phosphotransferase activity, alcohol group as acceptor; molecular_function GO:0004420; hydroxymethylglutaryl-…	{XM_010690039.2; PREDICTED: Beta vulgaris subsp. vulgaris hexokinase-1 (LOC104902309), mRNA}	{PF03727:Hexokinase PF00368:Hydroxymethylglutaryl-coenzyme A reductase PF00349:Hexokinase}
transcript_HQ_SAB_transcript8422/f2p0/2447	1.1115	2.3871e-07	8.0604e-07	{XP_010676931.1; PREDICTED: granule-bound starch synthase 1, chloroplastic/amyloplastic [Beta vulgaris subsp. vulgaris]}	{sp|Q00775|SSG1_SOLTU; Granule-bound starch synthase 1, chloroplastic/amyloplastic OS=Solanum tuberosum GN=WAXY PE=1 SV=1}	{bvg:104892645; K13679 WAXY granule-bound starch synthase 2.4.1.242 ko00500; Metabolism; Carbohydrate metabolism; Starch and sucrose metabolism}	{NA}	{NA}	{XM_010678629.2; PREDICTED: Beta vulgaris subsp. vulgaris granule-bound starch synthase 1, chloroplastic/amyloplastic (LOC104892645), mRNA}	{NA}
transcript_HQ_SAB_transcript8415/f6p0/2448	Inf	1.1424e-26	9.3117e-26	{XP_010682211.1; PREDICTED: acetyl-coenzyme A synthetase, chloroplastic/glyoxysomal [Beta vulgaris subsp. vulgaris]}	{sp|B9DGD6|ACS_ARATH; Acetyl-coenzyme A synthetase, chloroplastic/glyoxysomal OS=Arabidopsis thaliana GN=ACS PE=1 SV=1}	{nnu:104591930; K01895 ACSS, acs acetyl-CoA synthetase 6.2.1.1 ko01200; Metabolism; Global and overview maps; Carbon metabolism | ko00010; Metabolism; Carbohydrate metabolism; Glycolysis / gluconeogenesis | ko00620; Metabolism; Carbohydrate metabolism; Pyruvate metabolism | ko00640; Metabolism; Carbohydrate metabolism; Propanoate metabolism | ko00720; Metabolism; Energy metabolism; Carbon fixatio…	{At5g36880; KOG1175 Acyl-CoA synthetase I Lipid transport and metabolism ;}	{GO:0003824; NA GO:0008152; NA}	{XM_010683909.2; PREDICTED: Beta vulgaris subsp. vulgaris acetyl-coenzyme A synthetase, chloroplastic/glyoxysomal (LOC104897088), mRNA}	{PF00501:AMP-binding enzyme}
transcript_HQ_SAB_transcript8128/f2p0/2482	1.509	3.7555e-06	1.1395e-05	{KNA12199.1; hypothetical protein SOVF_128120 isoform B [Spinacia oleracea]}	{sp|Q9M0S5|ISOA3_ARATH; Isoamylase 3, chloroplastic OS=Arabidopsis thaliana GN=ISA3 PE=1 SV=2}	{bvg:104891740; K01214 ISA, treX isoamylase 3.2.1.68 ko00500; Metabolism; Carbohydrate metabolism; Starch and sucrose metabolism}	{At4g09020; KOG0470 1,4-alpha-glucan branching enzyme/starch branching enzyme II G Carbohydrate transport and metabolism ;}	{NA}	{AB838597.1; Amaranthus cruentus ISA3 mRNA for isoamylase-type starch debranching enzyme 3, complete cds}	{NA}
transcript_HQ_SAB_transcript6743/f2p0/2652	2.7163	1.0912e-20	7.3519e-20	{CAA03982.1; glucose-6-phosphate isomerase [Spinacia oleracea]}	{sp|Q8H103|G6PIP_ARATH; Glucose-6-phosphate isomerase 1, chloroplastic OS=Arabidopsis thaliana GN=PGI1 PE=1 SV=1}	{bvg:104891360; K01810 GPI, pgi glucose-6-phosphate isomerase 5.3.1.9 ko01200; Metabolism; Global and overview maps; Carbon metabolism | ko00010; Metabolism; Carbohydrate metabolism; Glycolysis / gluconeogenesis | ko00030; Metabolism; Carbohydrate metabolism; pentose phosphate pathway | ko00500; Metabolism; Carbohydrate metabolism; Starch and sucrose metabolism | ko00520; Metabolism; Carbohydrate…	{At4g24620; KOG2446 Glucose-6-phosphate isomerase G Carbohydrate transport and metabolism ;}	{GO:0004347; glucose-6-phosphate isomerase activity; molecular_function GO:0006096; glycolysis; biological_process GO:0006094; gluconeogenesis; biological_process}	{AJ000265.1; Spinacia oleracea mRNA (nuclear-encoded) for chloroplast glucose-6-phosphate isomerase}	{PF00342:Phosphoglucose isomerase}
transcript_HQ_SAB_transcript6689/f7p0/2608	0.47517	0.0087891	0.017409	{KNA18592.1; hypothetical protein SOVF_069220 [Spinacia oleracea]}	{sp|Q9M9Y5|GAUT6_ARATH; Probable galacturonosyltransferase 6 OS=Arabidopsis thaliana GN=GAUT6 PE=2 SV=1}	{bvg:104894598; K13648 GAUT alpha-1,4-galacturonosyltransferase 2.4.1.43 ko00520; Metabolism; Carbohydrate metabolism; Amino sugar and nucleotide sugar metabolism}	{NA}	{GO:0016757; transferase activity, transferring glycosyl groups; molecular_function}	{XM_010680871.2; PREDICTED: Beta vulgaris subsp. vulgaris probable galacturonosyltransferase 6 (LOC104894598), mRNA}	{PF01501:Glycosyl transferase family 8}
transcript_HQ_SAB_transcript6546/f2p0/2673	-0.74362	5.6605e-05	0.00015175	{XP_010671436.1; PREDICTED: starch synthase 1, chloroplastic/amyloplastic [Beta vulgaris subsp. vulgaris]}	{sp|Q9FNF2|SSY1_ARATH; Starch synthase 1, chloroplastic/amyloplastic OS=Arabidopsis thaliana GN=SS1 PE=2 SV=1}	{bvg:104888235; K00703 glgA starch synthase 2.4.1.21 ko00500; Metabolism; Carbohydrate metabolism; Starch and sucrose metabolism | ko02026; Cellular Processes; Cellular community - prokaryotes; Biofilm formation - Escherichia coli}	{NA}	{NA}	{XM_010673134.2; PREDICTED: Beta vulgaris subsp. vulgaris starch synthase 1, chloroplastic/amyloplastic (LOC104888235), mRNA}	{NA}
transcript_HQ_SAB_transcript6534/f3p0/2689	-1.0378	1.9857e-09	7.7635e-09	{KNA17622.1; hypothetical protein SOVF_078440 [Spinacia oleracea]}	{sp|O80831|BAM7_ARATH; Beta-amylase 7 OS=Arabidopsis thaliana GN=BAM7 PE=2 SV=2}	{bvg:104887495; K01177 E3.2.1.2 Beta-amylase 3.2.1.2 ko00500; Metabolism; Carbohydrate metabolism; Starch and sucrose metabolism}	{NA}	{GO:0000272; polysaccharide catabolic process; biological_process GO:0016161; Beta-amylase activity; molecular_function}	{XM_010672134.2; PREDICTED: Beta vulgaris subsp. vulgaris Beta-amylase 7 (LOC104887495), transcript variant X1, mRNA}	{PF01373:Glycosyl hydrolase family 14}
transcript_HQ_SAB_transcript6491/f10p0/2674	6.6395	2.3101e-83	5.4364e-82	{XP_010682211.1; PREDICTED: acetyl-coenzyme A synthetase, chloroplastic/glyoxysomal [Beta vulgaris subsp. vulgaris]}	{sp|B9DGD6|ACS_ARATH; Acetyl-coenzyme A synthetase, chloroplastic/glyoxysomal OS=Arabidopsis thaliana GN=ACS PE=1 SV=1}	{jcu:105630254; K01895 ACSS, acs acetyl-CoA synthetase 6.2.1.1 ko01200; Metabolism; Global and overview maps; Carbon metabolism | ko00010; Metabolism; Carbohydrate metabolism; Glycolysis / gluconeogenesis | ko00620; Metabolism; Carbohydrate metabolism; Pyruvate metabolism | ko00640; Metabolism; Carbohydrate metabolism; Propanoate metabolism | ko00720; Metabolism; Energy metabolism; Carbon fixatio…	{At5g36880; KOG1175 Acyl-CoA synthetase I Lipid transport and metabolism ;}	{GO:0003824; NA GO:0008152; NA}	{XM_010683909.2; PREDICTED: Beta vulgaris subsp. vulgaris acetyl-coenzyme A synthetase, chloroplastic/glyoxysomal (LOC104897088), mRNA}	{PF00501:AMP-binding enzyme}
transcript_HQ_SAB_transcript6271/f2p0/2720	-1.5106	1.7473e-15	9.5618e-15	{XP_010686598.1; PREDICTED: probable galacturonosyltransferase 4 [Beta vulgaris subsp. vulgaris]}	{sp|Q93ZX7|GAUT4_ARATH; Probable galacturonosyltransferase 4 OS=Arabidopsis thaliana GN=GAUT4 PE=2 SV=1}	{vvi:100258406; K13648 GAUT alpha-1,4-galacturonosyltransferase 2.4.1.43 ko00520; Metabolism; Carbohydrate metabolism; Amino sugar and nucleotide sugar metabolism}	{NA}	{GO:0005680; anaphase-promoting complex; cellular_component GO:0016757; transferase activity, transferring glycosyl groups; molecular_function}	{XM_010688296.2; PREDICTED: Beta vulgaris subsp. vulgaris probable galacturonosyltransferase 4 (LOC104900781), mRNA}	{PF01501:Glycosyl transferase family 8 PF12859:Anaphase-promoting complex subunit 1}
transcript_HQ_SAB_transcript6257/f5p0/2714	-0.68566	2.1379e-18	1.32e-17	{XP_010675264.1; PREDICTED: trifunctional UDP-glucose 4,6-dehydratase/UDP-4-keto-6-deoxy-D-glucose 3,5-epimerase/UDP-4-keto-L-rhamnose-reductase RHM1 [Beta vulgaris subsp. vulgaris]}	{sp|Q9SYM5|RHM1_ARATH; Trifunctional UDP-glucose 4,6-dehydratase/UDP-4-keto-6-deoxy-D-glucose 3,5-epimerase/UDP-4-keto-L-rhamnose-reductase RHM1 OS=Arabidopsis thaliana GN=RHM1 PE=1 SV=1}	{bvg:104891292; K12450 RHM UDP-glucose 4,6-dehydratase 4.2.1.76 ko00520; Metabolism; Carbohydrate metabolism; Amino sugar and nucleotide sugar metabolism}	{At1g78570; KOG0747 Putative NAD+-dependent epimerases G Carbohydrate transport and metabolism ;}	{GO:0016616; oxidoreductase activity, acting on the CH-OH group of donors, NAD or NADP as acceptor; molecular_function GO:0003824; NA GO:0003854; 3-beta-hydroxy-delta5-steroid dehydrogenase activity; molecular_function GO:0055114; oxidation-reduction process; biological_process GO:0050662; coenzyme binding; molecular_function GO:0006694; steroid biosynthetic process; biological_process}	{XM_010676963.2; PREDICTED: Beta vulgaris subsp. vulgaris trifunctional UDP-glucose 4,6-dehydratase/UDP-4-keto-6-deoxy-D-glucose 3,5-epimerase/UDP-4-keto-L-rhamnose-reductase RHM1 (LOC104891293), transcript variant X1, mRNA}	{PF01073:3-beta hydroxysteroid dehydrogenase/isomerase family PF01370:NAD dependent epimerase/dehydratase family}
transcript_HQ_SAB_transcript6237/f2p0/2735	1.2817	0.020372	0.037532	{XP_010686598.1; PREDICTED: probable galacturonosyltransferase 4 [Beta vulgaris subsp. vulgaris]}	{sp|Q93ZX7|GAUT4_ARATH; Probable galacturonosyltransferase 4 OS=Arabidopsis thaliana GN=GAUT4 PE=2 SV=1}	{vvi:100852446; K13648 GAUT alpha-1,4-galacturonosyltransferase 2.4.1.43 ko00520; Metabolism; Carbohydrate metabolism; Amino sugar and nucleotide sugar metabolism}	{NA}	{GO:0005680; anaphase-promoting complex; cellular_component GO:0016757; transferase activity, transferring glycosyl groups; molecular_function}	{XM_010688296.2; PREDICTED: Beta vulgaris subsp. vulgaris probable galacturonosyltransferase 4 (LOC104900781), mRNA}	{PF01501:Glycosyl transferase family 8 PF12859:Anaphase-promoting complex subunit 1}
transcript_HQ_SAB_transcript6198/f2p0/2733	6.4074	3.0511e-10	1.2618e-09	{KMT07822.1; hypothetical protein BVRB_6g146340 [Beta vulgaris subsp. vulgaris]}	{sp|B9DGD6|ACS_ARATH; Acetyl-coenzyme A synthetase, chloroplastic/glyoxysomal OS=Arabidopsis thaliana GN=ACS PE=1 SV=1}	{jcu:105630254; K01895 ACSS, acs acetyl-CoA synthetase 6.2.1.1 ko01200; Metabolism; Global and overview maps; Carbon metabolism | ko00010; Metabolism; Carbohydrate metabolism; Glycolysis / gluconeogenesis | ko00620; Metabolism; Carbohydrate metabolism; Pyruvate metabolism | ko00640; Metabolism; Carbohydrate metabolism; Propanoate metabolism | ko00720; Metabolism; Energy metabolism; Carbon fixatio…	{At5g36880; KOG1175 Acyl-CoA synthetase I Lipid transport and metabolism ;}	{GO:0008152; NA GO:0003824; NA}	{XM_010683909.2; PREDICTED: Beta vulgaris subsp. vulgaris acetyl-coenzyme A synthetase, chloroplastic/glyoxysomal (LOC104897088), mRNA}	{PF00501:AMP-binding enzyme}
transcript_HQ_SAB_transcript5873/f11p0/2758	0.77198	2.1829e-68	4.1475e-67	{AFS17277.1; sucrose synthase 1 [Amaranthus cruentus/Amaranthus hypocondriacus mixed library]}	{sp|P13708|SUSY_SOYBN; Sucrose synthase OS=Glycine max GN=SS PE=1 SV=2}	{adu:107496082; K00695 E2.4.1.13 sucrose synthase 2.4.1.13 ko00500; Metabolism; Carbohydrate metabolism; Starch and sucrose metabolism}	{At3g43190; KOG0853 Glycosyltransferase M Cell wall/membrane/envelope biogenesis ;}	{GO:0016157; sucrose synthase activity; molecular_function GO:0005985; sucrose metabolic process; biological_process}	{X82504.1; C.rubrum mRNA for sucrose synthase}	{PF00862:Sucrose synthase}
transcript_HQ_SAB_transcript5815/f6p0/2743	0.97102	1.8504e-53	2.7513e-52	{XP_010687921.1; PREDICTED: probable galactinol--sucrose galactosyltransferase 6 [Beta vulgaris subsp. vulgaris]}	{sp|Q8RX87|RFS6_ARATH; Probable galactinol--sucrose galactosyltransferase 6 OS=Arabidopsis thaliana GN=RFS6 PE=2 SV=2}	{cit:102620630; K06617 E2.4.1.82 Raffinose synthase 2.4.1.82 ko00052; Metabolism; Carbohydrate metabolism; galactose metabolism}	{NA}	{NA}	{XM_010689619.2; PREDICTED: Beta vulgaris subsp. vulgaris probable galactinol--sucrose galactosyltransferase 6 (LOC104901981), mRNA}	{NA}
transcript_HQ_SAB_transcript5780/f2p0/2753	-1.0636	2.6937e-11	1.1874e-10	{XP_010674968.1; PREDICTED: aldehyde dehydrogenase family 3 member H1 [Beta vulgaris subsp. vulgaris]}	{sp|Q70DU8|AL3H1_ARATH; Aldehyde dehydrogenase family 3 member H1 OS=Arabidopsis thaliana GN=ALDH3H1 PE=1 SV=2}	{bvg:104891026; K00128 ALDH aldehyde dehydrogenase (NAD+) 1.2.1.3 ko00010; Metabolism; Carbohydrate metabolism; Glycolysis / gluconeogenesis | ko00053; Metabolism; Carbohydrate metabolism; Ascorbate and aldarate metabolism | ko00620; Metabolism; Carbohydrate metabolism; Pyruvate metabolism | ko00071; Metabolism; Lipid metabolism; Fatty acid degradation | ko00561; Metabolism; Lipid metabolism; Gly…	{At1g44170; KOG2456 Aldehyde dehydrogenase C Energy production and conversion ;}	{GO:0008152; NA GO:0055114; oxidation-reduction process; biological_process GO:0016491; oxidoreductase activity; molecular_function}	{XM_010676666.2; PREDICTED: Beta vulgaris subsp. vulgaris aldehyde dehydrogenase family 3 member H1 (LOC104891026), mRNA}	{PF00171:Aldehyde dehydrogenase family}
transcript_HQ_SAB_transcript5552/f2p0/2806	0.52817	0.023773	0.043181	{XP_006449975.1; hypothetical protein CICLE_v10014426mg [Citrus clementina]}	{sp|Q93ZX7|GAUT4_ARATH; Probable galacturonosyltransferase 4 OS=Arabidopsis thaliana GN=GAUT4 PE=2 SV=1}	{fve:101307568; K13648 GAUT alpha-1,4-galacturonosyltransferase 2.4.1.43 ko00520; Metabolism; Carbohydrate metabolism; Amino sugar and nucleotide sugar metabolism}	{NA}	{GO:0005680; anaphase-promoting complex; cellular_component}	{XM_010688296.2; PREDICTED: Beta vulgaris subsp. vulgaris probable galacturonosyltransferase 4 (LOC104900781), mRNA}	{PF12859:Anaphase-promoting complex subunit 1}
transcript_HQ_SAB_transcript5452/f3p0/2823	-1.2395	1.4507e-178	7.682e-177	{XP_010675265.1; PREDICTED: trifunctional UDP-glucose 4,6-dehydratase/UDP-4-keto-6-deoxy-D-glucose 3,5-epimerase/UDP-4-keto-L-rhamnose-reductase RHM1 [Beta vulgaris subsp. vulgaris]}	{sp|Q9SYM5|RHM1_ARATH; Trifunctional UDP-glucose 4,6-dehydratase/UDP-4-keto-6-deoxy-D-glucose 3,5-epimerase/UDP-4-keto-L-rhamnose-reductase RHM1 OS=Arabidopsis thaliana GN=RHM1 PE=1 SV=1}	{bvg:104891293; K12450 RHM UDP-glucose 4,6-dehydratase 4.2.1.76 ko00520; Metabolism; Carbohydrate metabolism; Amino sugar and nucleotide sugar metabolism}	{At1g78570; KOG0747 Putative NAD+-dependent epimerases G Carbohydrate transport and metabolism ;}	{GO:0003854; 3-beta-hydroxy-delta5-steroid dehydrogenase activity; molecular_function GO:0016616; oxidoreductase activity, acting on the CH-OH group of donors, NAD or NADP as acceptor; molecular_function GO:0003824; NA GO:0006694; steroid biosynthetic process; biological_process GO:0055114; oxidation-reduction process; biological_process GO:0050662; coenzyme binding; molecular_function}	{XM_010676963.2; PREDICTED: Beta vulgaris subsp. vulgaris trifunctional UDP-glucose 4,6-dehydratase/UDP-4-keto-6-deoxy-D-glucose 3,5-epimerase/UDP-4-keto-L-rhamnose-reductase RHM1 (LOC104891293), transcript variant X1, mRNA}	{PF01073:3-beta hydroxysteroid dehydrogenase/isomerase family PF01370:NAD dependent epimerase/dehydratase family}
transcript_HQ_SAB_transcript5283/f3p0/2850	-0.21718	0.012767	0.024472	{KNA14982.1; hypothetical protein SOVF_102320 [Spinacia oleracea]}	{sp|Q8RU27|UPTG2_SOLTU; Alpha-1,4-glucan-protein synthase [UDP-forming] 2 OS=Solanum tuberosum GN=UPTG2 PE=1 SV=1}	{gmx:100788017; K13379 RGP, UTM reversibly glycosylated polypeptide / UDP-arabinopyranose mutase [EC:2.4.1.- 5.4.99.30] 2.4.1.-,5.4.99.30 ko00520; Metabolism; Carbohydrate metabolism; Amino sugar and nucleotide sugar metabolism}	{NA}	{GO:0016866; intramolecular transferase activity; molecular_function GO:0030244; cellulose biosynthetic process; biological_process}	{XM_010696958.2; PREDICTED: Beta vulgaris subsp. vulgaris alpha-1,4-glucan-protein synthase [UDP-forming] 2 (LOC104907929), mRNA}	{PF03214:Reversibly glycosylated polypeptide}
transcript_HQ_SAB_transcript5199/f3p0/2778	0.59234	0.010186	0.019916	{KNA14187.1; hypothetical protein SOVF_109550 [Spinacia oleracea]}	{sp|Q93ZX7|GAUT4_ARATH; Probable galacturonosyltransferase 4 OS=Arabidopsis thaliana GN=GAUT4 PE=2 SV=1}	{fve:101307568; K13648 GAUT alpha-1,4-galacturonosyltransferase 2.4.1.43 ko00520; Metabolism; Carbohydrate metabolism; Amino sugar and nucleotide sugar metabolism}	{NA}	{GO:0005680; anaphase-promoting complex; cellular_component}	{XM_010688296.2; PREDICTED: Beta vulgaris subsp. vulgaris probable galacturonosyltransferase 4 (LOC104900781), mRNA}	{PF12859:Anaphase-promoting complex subunit 1}
transcript_HQ_SAB_transcript5148/f3p0/2824	-1.6406	8.0118e-35	8.1578e-34	{XP_010667722.1; PREDICTED: polygalacturonate 4-alpha-galacturonosyltransferase [Beta vulgaris subsp. vulgaris]}	{sp|Q9LE59|GAUT1_ARATH; Polygalacturonate 4-alpha-galacturonosyltransferase OS=Arabidopsis thaliana GN=GAUT1 PE=1 SV=1}	{sly:101268802; K13648 GAUT alpha-1,4-galacturonosyltransferase 2.4.1.43 ko00520; Metabolism; Carbohydrate metabolism; Amino sugar and nucleotide sugar metabolism}	{NA}	{GO:0016757; transferase activity, transferring glycosyl groups; molecular_function}	{XM_010669420.2; PREDICTED: Beta vulgaris subsp. vulgaris polygalacturonate 4-alpha-galacturonosyltransferase (LOC104884733), mRNA}	{PF01501:Glycosyl transferase family 8}
transcript_HQ_SAB_transcript5043/f2p0/2883	-1.1496	0.00018704	0.00047033	{XP_010676845.1; PREDICTED: probable trehalase [Beta vulgaris subsp. vulgaris]}	{sp|Q9SU50|TRE1_ARATH; Trehalase OS=Arabidopsis thaliana GN=TRE1 PE=2 SV=1}	{bvg:104892576; K01194 TREH, treA, treF alpha,alpha-trehalase 3.2.1.28 ko00500; Metabolism; Carbohydrate metabolism; Starch and sucrose metabolism}	{At4g24040; KOG0602 Neutral trehalase G Carbohydrate transport and metabolism ;}	{GO:0004555; alpha,alpha-trehalase activity; molecular_function GO:0005991; trehalose metabolic process; biological_process}	{XM_010678543.2; PREDICTED: Beta vulgaris subsp. vulgaris probable trehalase (LOC104892576), mRNA}	{PF01204:Trehalase}
transcript_HQ_SAB_transcript4941/f2p0/2888	-1.4945	0.0012783	0.002891	{KNA05833.1; hypothetical protein SOVF_186640 [Spinacia oleracea]}	{sp|Q41059|GLGB2_PEA; 1,4-alpha-glucan-branching enzyme 1, chloroplastic/amyloplastic (Fragment) OS=Pisum sativum GN=SBEII PE=1 SV=1}	{gmx:100792499; K00700 GBE1, glgB 1,4-alpha-glucan branching enzyme 2.4.1.18 ko00500; Metabolism; Carbohydrate metabolism; Starch and sucrose metabolism}	{At2g36390; KOG0470 1,4-alpha-glucan branching enzyme/starch branching enzyme II G Carbohydrate transport and metabolism ;}	{GO:0005975; carbohydrate metabolic process; biological_process GO:0043169; cation binding; molecular_function GO:0004553; hydrolase activity, hydrolyzing O-glycosyl compounds; molecular_function GO:0003824; NA}	{XM_010694249.2; PREDICTED: Beta vulgaris subsp. vulgaris 1,4-alpha-glucan-branching enzyme 1, chloroplastic/amyloplastic (LOC104905653), mRNA}	{PF02806:Alpha amylase, C-terminal all-beta domain PF02922:Carbohydrate-binding module 48 (Isoamylase N-terminal domain) PF00128:Alpha amylase, catalytic domain}
transcript_HQ_SAB_transcript4637/f2p0/2970	3.8192	3.8095e-54	5.7409e-53	{XP_010671592.1; PREDICTED: alpha-glucosidase [Beta vulgaris subsp. vulgaris]}	{sp|O04893|AGLU_SPIOL; Alpha-glucosidase OS=Spinacia oleracea PE=1 SV=1}	{bvg:104888352; K01187 malZ alpha-glucosidase 3.2.1.20 ko00052; Metabolism; Carbohydrate metabolism; Galactose metabolism | ko00500; Metabolism; Carbohydrate metabolism; Starch and sucrose metabolism}	{At5g11720; KOG1065 Maltase glucoamylase and related hydrolases, glycosyl hydrolase family 31 G Carbohydrate transport and metabolism ;}	{GO:0004553; hydrolase activity, hydrolyzing O-glycosyl compounds; molecular_function GO:0005975; carbohydrate metabolic process; biological_process}	{XM_010673290.2; PREDICTED: Beta vulgaris subsp. vulgaris alpha-glucosidase (LOC104888352), mRNA}	{PF01055:Glycosyl hydrolases family 31 }
transcript_HQ_SAB_transcript4259/f2p0/3006	-1.0066	4.7493e-59	7.7906e-58	{XP_010685628.1; PREDICTED: alpha-glucan phosphorylase, H isozyme [Beta vulgaris subsp. vulgaris]}	{sp|Q9SD76|PHS2_ARATH; Alpha-glucan phosphorylase 2, cytosolic OS=Arabidopsis thaliana GN=PHS2 PE=1 SV=1}	{mdm:103447449; K00688 PYG, glgP glycogen phosphorylase 2.4.1.1 ko00500; Metabolism; Carbohydrate metabolism; Starch and sucrose metabolism | ko02026; Cellular Processes; Cellular community - prokaryotes; Biofilm formation - Escherichia coli | ko04910; Organismal Systems; Endocrine system; Insulin signaling pathway | ko04922; Organismal Systems; Endocrine system; Glucagon signaling pathway | ko04…	{At3g46970; KOG2099 Glycogen phosphorylase G Carbohydrate transport and metabolism ;}	{GO:0008184; glycogen phosphorylase activity; molecular_function GO:0005975; carbohydrate metabolic process; biological_process}	{XM_010687326.2; PREDICTED: Beta vulgaris subsp. vulgaris alpha-glucan phosphorylase, H isozyme (LOC104900011), mRNA}	{PF00343:Carbohydrate phosphorylase}
transcript_HQ_SAB_transcript4231/f7p0/2985	0.62595	0.00041903	0.0010074	{XP_010676845.1; PREDICTED: probable trehalase [Beta vulgaris subsp. vulgaris]}	{sp|Q9FWC1|TRE_ORYSJ; Probable trehalase OS=Oryza sativa subsp. japonica GN=Os10g0521000 PE=2 SV=1}	{bvg:104892576; K01194 TREH, treA, treF alpha,alpha-trehalase 3.2.1.28 ko00500; Metabolism; Carbohydrate metabolism; Starch and sucrose metabolism}	{At4g24040; KOG0602 Neutral trehalase G Carbohydrate transport and metabolism ;}	{GO:0004555; alpha,alpha-trehalase activity; molecular_function GO:0005991; trehalose metabolic process; biological_process}	{XM_010678543.2; PREDICTED: Beta vulgaris subsp. vulgaris probable trehalase (LOC104892576), mRNA}	{PF01204:Trehalase}
transcript_HQ_SAB_transcript4202/f6p0/3004	-0.94663	9.802e-20	6.38e-19	{XP_010693244.1; PREDICTED: granule-bound starch synthase 2, chloroplastic/amyloplastic [Beta vulgaris subsp. vulgaris]}	{sp|Q43847|SSY2_SOLTU; Granule-bound starch synthase 2, chloroplastic/amyloplastic OS=Solanum tuberosum GN=SS2 PE=1 SV=3}	{spen:107011298; K00703 glgA starch synthase 2.4.1.21 ko00500; Metabolism; Carbohydrate metabolism; Starch and sucrose metabolism | ko02026; Cellular Processes; Cellular community - prokaryotes; Biofilm formation - Escherichia coli; spen:107011298; K00703 glgA starch synthase 2.4.1.21 ko00500; Metabolism; Carbohydrate metabolism; Starch and sucrose metabolism | ko02026; Cellular Processes; Cellul…	{NA}	{NA}	{XM_010694943.2; PREDICTED: Beta vulgaris subsp. vulgaris granule-bound starch synthase 2, chloroplastic/amyloplastic (LOC104906215), transcript variant X2, mRNA}	{NA}
transcript_HQ_SAB_transcript4127/f2p0/3072	0.86516	0.00032027	0.00078308	{KNA06061.1; hypothetical protein SOVF_184280 [Spinacia oleracea]}	{sp|Q94A08|RFS2_ARATH; Probable galactinol--sucrose galactosyltransferase 2 OS=Arabidopsis thaliana GN=RFS2 PE=2 SV=2}	{egr:104445147; K06617 E2.4.1.82 Raffinose synthase 2.4.1.82 ko00052; Metabolism; Carbohydrate metabolism; galactose metabolism}	{NA}	{NA}	{XM_010668755.2; PREDICTED: Beta vulgaris subsp. vulgaris probable galactinol--sucrose galactosyltransferase 2 (LOC104884158), transcript variant X1, mRNA}	{NA}
transcript_HQ_SAB_transcript4116/f3p0/3039	-0.96265	0.0045057	0.0093697	{XP_010671592.1; PREDICTED: alpha-glucosidase [Beta vulgaris subsp. vulgaris]}	{sp|O04893|AGLU_SPIOL; Alpha-glucosidase OS=Spinacia oleracea PE=1 SV=1}	{bvg:104888352; K01187 malZ alpha-glucosidase 3.2.1.20 ko00052; Metabolism; Carbohydrate metabolism; Galactose metabolism | ko00500; Metabolism; Carbohydrate metabolism; Starch and sucrose metabolism}	{At5g11720; KOG1065 Maltase glucoamylase and related hydrolases, glycosyl hydrolase family 31 G Carbohydrate transport and metabolism ;}	{GO:0004553; hydrolase activity, hydrolyzing O-glycosyl compounds; molecular_function GO:0005975; carbohydrate metabolic process; biological_process}	{XM_010673290.2; PREDICTED: Beta vulgaris subsp. vulgaris alpha-glucosidase (LOC104888352), mRNA}	{PF01055:Glycosyl hydrolases family 31 }
transcript_HQ_SAB_transcript4028/f3p0/3047	1.0989	1.6352e-48	2.2347e-47	{XP_010684343.1; PREDICTED: sucrose synthase [Beta vulgaris subsp. vulgaris]}	{sp|Q42652|SUSY_BETVU; Sucrose synthase (Fragment) OS=Beta vulgaris GN=SS1 PE=2 SV=1}	{gra:105791444; K00695 E2.4.1.13 sucrose synthase 2.4.1.13 ko00500; Metabolism; Carbohydrate metabolism; Starch and sucrose metabolism}	{At4g02280; KOG0853 Glycosyltransferase M Cell wall/membrane/envelope biogenesis ;}	{GO:0016743; carboxyl- or carbamoyltransferase activity; molecular_function GO:0005985; sucrose metabolic process; biological_process GO:0016597; amino acid binding; molecular_function GO:0016157; sucrose synthase activity; molecular_function GO:0006520; cellular amino acid metabolic process; biological_process}	{XM_010686041.2; PREDICTED: Beta vulgaris subsp. vulgaris sucrose synthase (SBSS1), mRNA}	{PF00862:Sucrose synthase PF00185:Aspartate/ornithine carbamoyltransferase, Asp/Orn binding domain}
transcript_HQ_SAB_transcript3920/f4p0/3027	Inf	0.015654	0.029514	{XP_002505241.1; glycosyltransferase family 35 protein [Micromonas commoda]}	{sp|Q9XTL9|PYG_DROME; Glycogen phosphorylase OS=Drosophila melanogaster GN=GlyP PE=2 SV=2}	{mis:MICPUN_104969; K00688 PYG, glgP glycogen phosphorylase 2.4.1.1 ko00500; Metabolism; Carbohydrate metabolism; Starch and sucrose metabolism | ko02026; Cellular Processes; Cellular community - prokaryotes; Biofilm formation - Escherichia coli | ko04910; Organismal Systems; Endocrine system; Insulin signaling pathway | ko04922; Organismal Systems; Endocrine system; Glucagon signaling pathway | …	{7296006; KOG2099 Glycogen phosphorylase G Carbohydrate transport and metabolism ;}	{GO:0005975; carbohydrate metabolic process; biological_process GO:0008184; glycogen phosphorylase activity; molecular_function}	{NA}	{PF00343:Carbohydrate phosphorylase}
transcript_HQ_SAB_transcript3907/f3p0/3089	0.80445	0.00044521	0.0010671	{XP_010678736.1; PREDICTED: probable alpha,alpha-trehalose-phosphate synthase [UDP-forming] 9 [Beta vulgaris subsp. vulgaris]}	{sp|O80738|TPS10_ARATH; Probable alpha,alpha-trehalose-phosphate synthase [UDP-forming] 10 OS=Arabidopsis thaliana GN=TPS10 PE=2 SV=1}	{bvg:104894247; K16055 TPS trehalose 6-phosphate synthase/phosphatase [EC:2.4.1.15 3.1.3.12] 2.4.1.15,3.1.3.12 ko00500; Metabolism; Carbohydrate metabolism; Starch and sucrose metabolism}	{At1g60140; KOG1050 Trehalose-6-phosphate synthase component TPS1 and related subunits G Carbohydrate transport and metabolism ;}	{GO:0005992; trehalose biosynthetic process; biological_process GO:0003824; NA}	{XM_010680434.2; PREDICTED: Beta vulgaris subsp. vulgaris probable alpha,alpha-trehalose-phosphate synthase [UDP-forming] 9 (LOC104894247), mRNA}	{PF00982:Glycosyltransferase family 20 PF02358:Trehalose-phosphatase}
transcript_HQ_SAB_transcript3367/f2p0/3196	Inf	6.9893e-07	2.2687e-06	{XP_010682211.1; PREDICTED: acetyl-coenzyme A synthetase, chloroplastic/glyoxysomal [Beta vulgaris subsp. vulgaris]}	{sp|B9DGD6|ACS_ARATH; Acetyl-coenzyme A synthetase, chloroplastic/glyoxysomal OS=Arabidopsis thaliana GN=ACS PE=1 SV=1}	{jcu:105630254; K01895 ACSS, acs acetyl-CoA synthetase 6.2.1.1 ko01200; Metabolism; Global and overview maps; Carbon metabolism | ko00010; Metabolism; Carbohydrate metabolism; Glycolysis / gluconeogenesis | ko00620; Metabolism; Carbohydrate metabolism; Pyruvate metabolism | ko00640; Metabolism; Carbohydrate metabolism; Propanoate metabolism | ko00720; Metabolism; Energy metabolism; Carbon fixatio…	{At5g36880; KOG1175 Acyl-CoA synthetase I Lipid transport and metabolism ;}	{GO:0008152; NA GO:0003824; NA}	{XM_010683909.2; PREDICTED: Beta vulgaris subsp. vulgaris acetyl-coenzyme A synthetase, chloroplastic/glyoxysomal (LOC104897088), mRNA}	{PF00501:AMP-binding enzyme}
transcript_HQ_SAB_transcript3053/f2p0/3306	1.1667	2.8146e-07	9.4498e-07	{KMT02758.1; hypothetical protein BVRB_8g193450 [Beta vulgaris subsp. vulgaris]}	{sp|P49031|SPSA_BETVU; Probable sucrose-phosphate synthase OS=Beta vulgaris GN=SPS PE=2 SV=1}	{pper:PRUPE_ppa000639mg; K00696 E2.4.1.14 sucrose-phosphate synthase 2.4.1.14 ko00500; Metabolism; Carbohydrate metabolism; Starch and sucrose metabolism}	{At5g20280; KOG0853 Glycosyltransferase M Cell wall/membrane/envelope biogenesis ;}	{GO:0016157; sucrose synthase activity; molecular_function GO:0005985; sucrose metabolic process; biological_process}	{NM_001303068.1; Beta vulgaris subsp. vulgaris probable sucrose-phosphate synthase (SBSPS1), mRNA}	{PF00862:Sucrose synthase}
transcript_HQ_SAB_transcript30253/f2p0/848	0.32623	0.0031076	0.0066335	{XP_010558960.1; PREDICTED: bifunctional enolase 2/transcriptional activator [Tarenaya hassleriana]}	{sp|P42896|ENO_RICCO; Enolase OS=Ricinus communis PE=2 SV=1}	{cic:CICLE_v10011726mg; K01689 ENO, eno enolase 4.2.1.11 ko01200; Metabolism; Global and overview maps; Carbon metabolism | ko01230; Metabolism; Global and overview maps; Biosynthesis of amino acids | ko00010; Metabolism; Carbohydrate metabolism; Glycolysis / gluconeogenesis | ko00680; Metabolism; Energy metabolism; Methane metabolism | ko03018; Genetic Information Processing; Folding, sorting an…	{At2g36530; KOG2670 Enolase G Carbohydrate transport and metabolism ;}	{NA}	{XM_010685584.2; PREDICTED: Beta vulgaris subsp. vulgaris enolase (LOC104898495), mRNA}	{NA}
transcript_HQ_SAB_transcript3006/f4p0/3230	-0.34801	0.0025847	0.0055843	{XP_010687711.1; PREDICTED: probable alpha,alpha-trehalose-phosphate synthase [UDP-forming] 11 [Beta vulgaris subsp. vulgaris]}	{sp|Q9ZV48|TPS11_ARATH; Probable alpha,alpha-trehalose-phosphate synthase [UDP-forming] 11 OS=Arabidopsis thaliana GN=TPS11 PE=2 SV=1}	{pmum:103323334; K16055 TPS trehalose 6-phosphate synthase/phosphatase [EC:2.4.1.15 3.1.3.12] 2.4.1.15,3.1.3.12 ko00500; Metabolism; Carbohydrate metabolism; Starch and sucrose metabolism}	{At2g18700; KOG1050 Trehalose-6-phosphate synthase component TPS1 and related subunits G Carbohydrate transport and metabolism ;}	{GO:0003824; NA GO:0005992; trehalose biosynthetic process; biological_process}	{XM_010689409.2; PREDICTED: Beta vulgaris subsp. vulgaris probable alpha,alpha-trehalose-phosphate synthase [UDP-forming] 11 (LOC104901797), mRNA}	{PF02358:Trehalose-phosphatase PF00982:Glycosyltransferase family 20}
transcript_HQ_SAB_transcript3001/f2p0/3286	-0.7409	0.016515	0.030993	{KNA20125.1; hypothetical protein SOVF_055250 [Spinacia oleracea]}	{sp|O23617|TPS5_ARATH; Alpha,alpha-trehalose-phosphate synthase [UDP-forming] 5 OS=Arabidopsis thaliana GN=TPS5 PE=1 SV=2}	{bvg:104893000; K16055 TPS trehalose 6-phosphate synthase/phosphatase [EC:2.4.1.15 3.1.3.12] 2.4.1.15,3.1.3.12 ko00500; Metabolism; Carbohydrate metabolism; Starch and sucrose metabolism}	{At4g17770; KOG1050 Trehalose-6-phosphate synthase component TPS1 and related subunits G Carbohydrate transport and metabolism ;}	{GO:0003824; NA GO:0005992; trehalose biosynthetic process; biological_process}	{XM_010679030.2; PREDICTED: Beta vulgaris subsp. vulgaris alpha,alpha-trehalose-phosphate synthase [UDP-forming] 5 (LOC104893000), transcript variant X2, mRNA}	{PF00982:Glycosyltransferase family 20 PF02358:Trehalose-phosphatase}
transcript_HQ_SAB_transcript28400/f2p0/1022	0.88907	0.0054942	0.011265	{XP_010681572.1; PREDICTED: dihydrolipoyllysine-residue acetyltransferase component 4 of pyruvate dehydrogenase complex, chloroplastic [Beta vulgaris subsp. vulgaris]}	{sp|Q9SQI8|ODP24_ARATH; Dihydrolipoyllysine-residue acetyltransferase component 4 of pyruvate dehydrogenase complex, chloroplastic OS=Arabidopsis thaliana GN=LTA2 PE=2 SV=1}	{sind:105161131; K00627 DLAT, aceF, pdhC pyruvate dehydrogenase E2 component (dihydrolipoamide acetyltransferase) 2.3.1.12 ko01200; Metabolism; Global and overview maps; Carbon metabolism | ko00010; Metabolism; Carbohydrate metabolism; Glycolysis / gluconeogenesis | ko00020; Metabolism; Carbohydrate metabolism; Citrate cycle (TCA cycle) | ko00620; Metabolism; Carbohydrate metabolism; Pyruvate met…	{At3g25860; KOG0557 Dihydrolipoamide acetyltransferase C Energy production and conversion ;}	{GO:0008152; NA GO:0016746; transferase activity, transferring acyl groups; molecular_function}	{XM_010683270.2; PREDICTED: Beta vulgaris subsp. vulgaris dihydrolipoyllysine-residue acetyltransferase component 4 of pyruvate dehydrogenase complex, chloroplastic (LOC104896518), mRNA}	{PF00198:2-oxoacid dehydrogenases acyltransferase (catalytic domain)}
transcript_HQ_SAB_transcript28003/f2p0/1068	0.20954	0.019768	0.036521	{XP_010687452.1; PREDICTED: endochitinase EP3 [Beta vulgaris subsp. vulgaris]}	{sp|P29022|CHIA_MAIZE; Endochitinase A OS=Zea mays PE=1 SV=1}	{nnu:104598285; K01183 E3.2.1.14 chitinase 3.2.1.14 ko00520; Metabolism; Carbohydrate metabolism; Amino sugar and nucleotide sugar metabolism}	{At3g54420; KOG4742 Predicted chitinase R General function prediction only ;}	{GO:0004568; chitinase activity; molecular_function GO:0008061; chitin binding; molecular_function GO:0016998; cell wall macromolecule catabolic process; biological_process GO:0006032; chitin catabolic process; biological_process}	{XM_010689150.2; PREDICTED: Beta vulgaris subsp. vulgaris endochitinase EP3 (LOC104901561), mRNA}	{PF00182:Chitinase class I PF00187:Chitin recognition protein}
transcript_HQ_SAB_transcript27674/f2p0/1092	Inf	2.5273e-72	5.1146e-71	{XP_010672299.1; PREDICTED: acidic endochitinase SP2 [Beta vulgaris subsp. vulgaris]}	{sp|P42820|CHIP_BETVU; Acidic endochitinase SP2 OS=Beta vulgaris GN=SP2 PE=1 SV=1}	{bvg:104888888; K01183 E3.2.1.14 chitinase 3.2.1.14 ko00520; Metabolism; Carbohydrate metabolism; Amino sugar and nucleotide sugar metabolism}	{At3g54420; KOG4742 Predicted chitinase R General function prediction only ;}	{GO:0016998; cell wall macromolecule catabolic process; biological_process GO:0006032; chitin catabolic process; biological_process GO:0004568; chitinase activity; molecular_function GO:0008061; chitin binding; molecular_function}	{AY277396.1; Euonymus europaeus hevein-like antimicrobial peptide mRNA, complete cds}	{PF00182:Chitinase class I PF00187:Chitin recognition protein}
transcript_HQ_SAB_transcript27645/f5p0/1089	-1.0786	3.5331e-11	1.5477e-10	{KNA05271.1; hypothetical protein SOVF_191970 [Spinacia oleracea]}	{sp|O23553|BAM3_ARATH; Beta-amylase 3, chloroplastic OS=Arabidopsis thaliana GN=BAM3 PE=1 SV=3}	{pop:POPTR_0003s08360g; K01177 E3.2.1.2 Beta-amylase 3.2.1.2 ko00500; Metabolism; Carbohydrate metabolism; Starch and sucrose metabolism}	{NA}	{GO:0016161; Beta-amylase activity; molecular_function GO:0000272; polysaccharide catabolic process; biological_process GO:0000272; polysaccharide catabolic process; biological_process GO:0016161; Beta-amylase activity; molecular_function}	{XM_010697150.2; PREDICTED: Beta vulgaris subsp. vulgaris Beta-amylase 3, chloroplastic (LOC104908081), mRNA}	{PF01373:Glycosyl hydrolase family 14 PF01373:Glycosyl hydrolase family 14}
transcript_HQ_SAB_transcript27466/f3p0/1104	-0.89102	8.4307e-122	2.901e-120	{XP_010671559.1; PREDICTED: hevamine-A [Beta vulgaris subsp. vulgaris]}	{sp|P36908|CHIA_CICAR; Acidic endochitinase OS=Cicer arietinum PE=2 SV=1}	{bvg:104888322; K01183 E3.2.1.14 chitinase 3.2.1.14 ko00520; Metabolism; Carbohydrate metabolism; Amino sugar and nucleotide sugar metabolism}	{At5g24090; KOG4701 Chitinase M Cell wall/membrane/envelope biogenesis ;}	{GO:0004553; hydrolase activity, hydrolyzing O-glycosyl compounds; molecular_function GO:0005975; carbohydrate metabolic process; biological_process}	{XM_010673614.1; PREDICTED: Beta vulgaris subsp. vulgaris acidic endochitinase (LOC104888591), mRNA}	{PF00704:Glycosyl hydrolases family 18}
transcript_HQ_SAB_transcript2693/f2p0/3352	-1.5743	2.1629e-12	1.0164e-11	{XP_010695328.1; PREDICTED: isoamylase 2, chloroplastic [Beta vulgaris subsp. vulgaris]}	{sp|Q8L735|ISOA2_ARATH; Isoamylase 2, chloroplastic OS=Arabidopsis thaliana GN=ISA2 PE=1 SV=2}	{pper:PRUPE_ppa001199mg; K01214 ISA, treX isoamylase 3.2.1.68 ko00500; Metabolism; Carbohydrate metabolism; Starch and sucrose metabolism}	{At1g03310; KOG0470 1,4-alpha-glucan branching enzyme/starch branching enzyme II G Carbohydrate transport and metabolism ;}	{GO:0005975; carbohydrate metabolic process; biological_process GO:0003824; NA GO:0004553; hydrolase activity, hydrolyzing O-glycosyl compounds; molecular_function}	{XM_010697029.2; PREDICTED: Beta vulgaris subsp. vulgaris isoamylase 2, chloroplastic (LOC104907991), transcript variant X2, mRNA}	{PF00128:Alpha amylase, catalytic domain PF02922:Carbohydrate-binding module 48 (Isoamylase N-terminal domain)}
transcript_HQ_SAB_transcript26820/f2p0/1157	3.1601	8.5135e-09	3.1898e-08	{KNA08228.1; hypothetical protein SOVF_164510 [Spinacia oleracea]}	{sp|P48495|TPIS_PETHY; Triosephosphate isomerase, cytosolic OS=Petunia hybrida GN=TPIP1 PE=2 SV=1}	{bvg:104904128; K01803 TPI, tpiA triosephosphate isomerase (TIM) 5.3.1.1 ko01200; Metabolism; Global and overview maps; Carbon metabolism | ko01230; Metabolism; Global and overview maps; Biosynthesis of amino acids | ko00010; Metabolism; Carbohydrate metabolism; Glycolysis / Gluconeogenesis | ko00051; Metabolism; Carbohydrate metabolism; Fructose and mannose metabolism | ko00562; Metabolism; Carb…	{At3g55440; KOG1643 Triosephosphate isomerase G Carbohydrate transport and metabolism ;}	{GO:0008152; NA GO:0006351; transcription, DNA-dependent; biological_process GO:0005634; nucleus; cellular_component GO:0003899; DNA-directed RNA polymerase activity; molecular_function GO:0004807; triose-phosphate isomerase activity; molecular_function}	{XM_010692322.2; PREDICTED: Beta vulgaris subsp. vulgaris triosephosphate isomerase, cytosolic (LOC104904128), mRNA}	{PF00121:Triosephosphate isomerase PF06883:RNA polymerase I, Rpa2 specific domain }
transcript_HQ_SAB_transcript26608/f3p0/1176	1.1315	6.8255e-08	2.4067e-07	{KNA03788.1; hypothetical protein SOVF_205770 [Spinacia oleracea]}	{sp|P36907|CHIX_PEA; Endochitinase OS=Pisum sativum PE=2 SV=1}	{bvg:104891226; K20547 CHIB basic endochitinase B 3.2.1.14 ko00520; Metabolism; Carbohydrate metabolism; Amino sugar and nucleotide sugar metabolism | ko04016; Environmental Information Processing; Signal transduction; MAPK signaling pathway - plant}	{At3g12500; KOG4742 Predicted chitinase R General function prediction only ;}	{GO:0030141; stored secretory granule; cellular_component GO:0008061; chitin binding; molecular_function GO:0004568; chitinase activity; molecular_function GO:0006032; chitin catabolic process; biological_process GO:0007218; neuropeptide signaling pathway; biological_process GO:0016998; cell wall macromolecule catabolic process; biological_process}	{XM_010676890.2; PREDICTED: Beta vulgaris subsp. vulgaris basic endochitinase (LOC104891226), mRNA}	{PF05281:Neuroendocrine protein 7B2 precursor (Secretogranin V) PF00182:Chitinase class I PF00187:Chitin recognition protein}
transcript_HQ_SAB_transcript26515/f12p0/1152	-1.2531	2.5498e-83	5.9923e-82	{KNA08228.1; hypothetical protein SOVF_164510 [Spinacia oleracea]}	{sp|P48494|TPIS_ORYSJ; Triosephosphate isomerase, cytosolic OS=Oryza sativa subsp. japonica GN=TPI PE=1 SV=3}	{bvg:104904128; K01803 TPI, tpiA triosephosphate isomerase (TIM) 5.3.1.1 ko01200; Metabolism; Global and overview maps; Carbon metabolism | ko01230; Metabolism; Global and overview maps; Biosynthesis of amino acids | ko00010; Metabolism; Carbohydrate metabolism; Glycolysis / Gluconeogenesis | ko00051; Metabolism; Carbohydrate metabolism; Fructose and mannose metabolism | ko00562; Metabolism; Carb…	{At3g55440; KOG1643 Triosephosphate isomerase G Carbohydrate transport and metabolism ;}	{GO:0008152; NA GO:0005634; nucleus; cellular_component GO:0003899; DNA-directed RNA polymerase activity; molecular_function GO:0004807; triose-phosphate isomerase activity; molecular_function GO:0006351; transcription, DNA-dependent; biological_process}	{XM_010692322.2; PREDICTED: Beta vulgaris subsp. vulgaris triosephosphate isomerase, cytosolic (LOC104904128), mRNA}	{PF06883:RNA polymerase I, Rpa2 specific domain PF00121:Triosephosphate isomerase}
transcript_HQ_SAB_transcript26436/f7p0/1171	-0.2189	0.0033333	0.007078	{KMT15927.1; hypothetical protein BVRB_3g051140 [Beta vulgaris subsp. vulgaris]}	{sp|A2Z3C4|6PGL4_ORYSI; Probable 6-phosphogluconolactonase 4, chloroplastic OS=Oryza sativa subsp. indica GN=OsI_031067 PE=3 SV=2}	{bvg:104888171; K01057 PGLS, pgl, devB 6-phosphogluconolactonase 3.1.1.31 ko01200; Metabolism; Global and overview maps; Carbon metabolism | ko00030; Metabolism; Carbohydrate metabolism; pentose phosphate pathway}	{At5g24400; KOG3147 6-phosphogluconolactonase - like protein G Carbohydrate transport and metabolism ;}	{GO:0005975; carbohydrate metabolic process; biological_process}	{XM_012217311.1; PREDICTED: Jatropha curcas probable 6-phosphogluconolactonase 4, chloroplastic (LOC105634451), mRNA}	{PF01182:Glucosamine-6-phosphate isomerases/6-phosphogluconolactonase}
transcript_HQ_SAB_transcript25574/f2p0/1250	-1.7308	1.3284e-62	2.2948e-61	{XP_010671918.1; PREDICTED: acidic endochitinase-like [Beta vulgaris subsp. vulgaris]}	{sp|P23472|CHLY_HEVBR; Hevamine-A OS=Hevea brasiliensis PE=1 SV=2}	{bvg:104888592; K01183 E3.2.1.14 chitinase 3.2.1.14 ko00520; Metabolism; Carbohydrate metabolism; Amino sugar and nucleotide sugar metabolism}	{At5g24090; KOG4701 Chitinase M Cell wall/membrane/envelope biogenesis ;}	{GO:0005975; carbohydrate metabolic process; biological_process GO:0004553; hydrolase activity, hydrolyzing O-glycosyl compounds; molecular_function}	{XM_010673616.2; PREDICTED: Beta vulgaris subsp. vulgaris acidic endochitinase-like (LOC104888592), mRNA}	{PF00704:Glycosyl hydrolases family 18}
transcript_HQ_SAB_transcript25183/f2p0/1288	0.37131	0.019974	0.03685	{XP_010679093.1; PREDICTED: aldose 1-epimerase [Beta vulgaris subsp. vulgaris]}	{sp|Q66HG4|GALM_RAT; Aldose 1-epimerase OS=Rattus norvegicus GN=Galm PE=1 SV=1}	{bvg:104894535; K01785 galM, GALM aldose 1-epimerase 5.1.3.3 ko00010; Metabolism; Carbohydrate metabolism; Glycolysis / Gluconeogenesis | ko00052; Metabolism; Carbohydrate metabolism; galactose metabolism}	{At3g17940; KOG1604 Predicted mutarotase G Carbohydrate transport and metabolism ;}	{GO:0016853; isomerase activity; molecular_function GO:0005975; carbohydrate metabolic process; biological_process}	{XM_010680791.2; PREDICTED: Beta vulgaris subsp. vulgaris aldose 1-epimerase (LOC104894535), mRNA}	{PF01263:Aldose 1-epimerase}
transcript_HQ_SAB_transcript2518/f2p0/3403	-0.37293	1.1131e-06	3.554e-06	{XP_010680522.1; PREDICTED: galactinol--sucrose galactosyltransferase [Beta vulgaris subsp. vulgaris]}	{sp|Q8VWN6|RFS_PEA; Galactinol--sucrose galactosyltransferase OS=Pisum sativum GN=RFS PE=1 SV=1}	{bvg:104895650; K06617 E2.4.1.82 Raffinose synthase 2.4.1.82 ko00052; Metabolism; Carbohydrate metabolism; galactose metabolism}	{NA}	{NA}	{XM_010682220.2; PREDICTED: Beta vulgaris subsp. vulgaris galactinol--sucrose galactosyltransferase (LOC104895650), mRNA}	{NA}
transcript_HQ_SAB_transcript2451/f11p0/3395	-0.29098	1.0745e-05	3.1197e-05	{XP_010682587.1; PREDICTED: probable alpha,alpha-trehalose-phosphate synthase [UDP-forming] 9 [Beta vulgaris subsp. vulgaris]}	{sp|Q9LRA7|TPS9_ARATH; Probable alpha,alpha-trehalose-phosphate synthase [UDP-forming] 9 OS=Arabidopsis thaliana GN=TPS9 PE=2 SV=1}	{mdm:103451948; K16055 TPS trehalose 6-phosphate synthase/phosphatase [EC:2.4.1.15 3.1.3.12] 2.4.1.15,3.1.3.12 ko00500; Metabolism; Carbohydrate metabolism; Starch and sucrose metabolism}	{At1g23870; KOG1050 Trehalose-6-phosphate synthase component TPS1 and related subunits G Carbohydrate transport and metabolism ;}	{GO:0005992; trehalose biosynthetic process; biological_process GO:0003824; NA}	{XM_010684285.2; PREDICTED: Beta vulgaris subsp. vulgaris probable alpha,alpha-trehalose-phosphate synthase [UDP-forming] 9 (LOC104897415), transcript variant X1, mRNA}	{PF00982:Glycosyltransferase family 20 PF02358:Trehalose-phosphatase}
transcript_HQ_SAB_transcript24234/f4p0/1331	-0.67461	0.0007412	0.0017307	{XP_010674148.1; PREDICTED: probable ribose-5-phosphate isomerase 2 [Beta vulgaris subsp. vulgaris]}	{sp|Q9ZU38|RPI2_ARATH; Probable ribose-5-phosphate isomerase 2 OS=Arabidopsis thaliana GN=RPI2 PE=1 SV=1}	{bvg:104890380; K01807 rpiA ribose 5-phosphate isomerase A 5.3.1.6 ko01200; Metabolism; Global and overview maps; Carbon metabolism | ko01230; Metabolism; Global and overview maps; Biosynthesis of amino acids | ko00030; Metabolism; Carbohydrate metabolism; pentose phosphate pathway | ko00710; Metabolism; Energy metabolism; Carbon fixation in photosynthetic organisms}	{At2g01290; KOG3075 Ribose 5-phosphate isomerase G Carbohydrate transport and metabolism ;}	{GO:0009052; pentose-phosphate shunt, non-oxidative branch; biological_process GO:0004751; ribose-5-phosphate isomerase activity; molecular_function}	{NA}	{PF06026:Ribose 5-phosphate isomerase A (phosphoriboisomerase A)}
transcript_HQ_SAB_transcript24120/f2p0/1340	-0.20246	1.2743e-06	4.0504e-06	{P14766.2; RecName: Full=Fructose-1,6-bisphosphatase, cytosolic; Short=FBPase; AltName: Full=D-fructose-1,6-bisphosphate 1-phosphohydrolase}	{sp|P14766|F16P2_SPIOL; Fructose-1,6-bisphosphatase, cytosolic OS=Spinacia oleracea PE=1 SV=2}	{bvg:104895737; K03841 FBP, fbp fructose-1,6-bisphosphatase I 3.1.3.11 ko01200; Metabolism; Global and overview maps; Carbon metabolism | ko00010; Metabolism; Carbohydrate metabolism; Glycolysis / Gluconeogenesis | ko00030; Metabolism; Carbohydrate metabolism; Pentose phosphate pathway | ko00051; Metabolism; Carbohydrate metabolism; Fructose and mannose metabolism | ko00710; Metabolism; Energy me…	{At1g43670; KOG1458 Fructose-1,6-bisphosphatase G Carbohydrate transport and metabolism ;}	{NA}	{X61690.1; S.olearacea Scytfbpy gene for fructose-1,6-bisphosphatase}	{NA}
transcript_HQ_SAB_transcript24055/f2p0/1360	-0.20195	5.3055e-05	0.00014267	{XP_010690445.1; PREDICTED: triosephosphate isomerase, chloroplastic [Beta vulgaris subsp. vulgaris]}	{sp|P48496|TPIC_SPIOL; Triosephosphate isomerase, chloroplastic OS=Spinacia oleracea GN=TPIP1 PE=1 SV=1}	{sly:101246286; K01803 TPI, tpiA triosephosphate isomerase (TIM) 5.3.1.1 ko01200; Metabolism; Global and overview maps; Carbon metabolism | ko01230; Metabolism; Global and overview maps; Biosynthesis of amino acids | ko00010; Metabolism; Carbohydrate metabolism; Glycolysis / Gluconeogenesis | ko00051; Metabolism; Carbohydrate metabolism; Fructose and mannose metabolism | ko00562; Metabolism; Carb…	{At2g21170; KOG1643 Triosephosphate isomerase G Carbohydrate transport and metabolism ;}	{GO:0008152; NA GO:0055070; copper ion homeostasis; biological_process GO:0004807; triose-phosphate isomerase activity; molecular_function GO:0005507; copper ion binding; molecular_function}	{XM_010692143.2; PREDICTED: Beta vulgaris subsp. vulgaris triosephosphate isomerase, chloroplastic (LOC104903984), mRNA}	{PF03932:CutC family PF00121:Triosephosphate isomerase}
transcript_HQ_SAB_transcript23990/f2p0/1359	Inf	7.7157e-05	0.00020375	{JAT54118.1; Glyceraldehyde-3-phosphate dehydrogenase 2 [Anthurium amnicola]}	{sp|O44104|G3P2_DROPS; Glyceraldehyde-3-phosphate dehydrogenase 2 OS=Drosophila pseudoobscura pseudoobscura GN=Gapdh2 PE=2 SV=2}	{osa:4328446; K00134 GAPDH, gapA glyceraldehyde 3-phosphate dehydrogenase 1.2.1.12 ko01200; Metabolism; Global and overview maps; Carbon metabolism | ko01230; Metabolism; Global and overview maps; Biosynthesis of amino acids | ko00010; Metabolism; Carbohydrate metabolism; Glycolysis / gluconeogenesis | ko00710; Metabolism; Energy metabolism; Carbon fixation in photosynthetic organisms | ko04066; …	{7293147; KOG0657 Glyceraldehyde 3-phosphate dehydrogenase G Carbohydrate transport and metabolism ;}	{GO:0051287; NAD binding; molecular_function GO:0016620; oxidoreductase activity, acting on the aldehyde or oxo group of donors, NAD or NADP as acceptor; molecular_function GO:0055114; oxidation-reduction process; biological_process}	{XM_006493704.2; PREDICTED: Citrus sinensis glyceraldehyde-3-phosphate dehydrogenase GAPCP1, chloroplastic (LOC102630521), mRNA}	{PF02800:Glyceraldehyde 3-phosphate dehydrogenase, C-terminal domain PF02826:D-isomer specific 2-hydroxyacid dehydrogenase, NAD binding domain PF00044:Glyceraldehyde 3-phosphate dehydrogenase, NAD binding domain}
transcript_HQ_SAB_transcript23974/f2p0/1368	-0.18054	0.00075274	0.0017562	{XP_010672224.1; PREDICTED: probable fructokinase-4 [Beta vulgaris subsp. vulgaris]}	{sp|Q9LNE3|SCRK2_ARATH; Probable fructokinase-2 OS=Arabidopsis thaliana GN=At1g06030 PE=2 SV=1}	{bvg:104888823; K00847 E2.7.1.4, scrK fructokinase 2.7.1.4 ko00051; Metabolism; Carbohydrate metabolism; Fructose and mannose metabolism | ko00500; Metabolism; Carbohydrate metabolism; Starch and sucrose metabolism | ko00520; Metabolism; Carbohydrate metabolism; Amino sugar and nucleotide sugar metabolism}	{At1g06030; KOG2855 Ribokinase G Carbohydrate transport and metabolism ;}	{NA}	{XM_010673922.2; PREDICTED: Beta vulgaris subsp. vulgaris probable fructokinase-4 (LOC104888823), mRNA}	{NA}
transcript_HQ_SAB_transcript23844/f2p0/1364	0.8045	2.2008e-07	7.4505e-07	{KNA15788.1; hypothetical protein SOVF_094960 [Spinacia oleracea]}	{sp|Q9ZU52|ALFP3_ARATH; Fructose-bisphosphate aldolase 3, chloroplastic OS=Arabidopsis thaliana GN=FBA3 PE=1 SV=1}	{bvg:104890526; K01623 ALDO fructose-bisphosphate aldolase, class I 4.1.2.13 ko01200; Metabolism; Global and overview maps; Carbon metabolism | ko01230; Metabolism; Global and overview maps; Biosynthesis of amino acids | ko00010; Metabolism; Carbohydrate metabolism; Glycolysis / Gluconeogenesis | ko00030; Metabolism; Carbohydrate metabolism; Pentose phosphate pathway | ko00051; Metabolism; Carboh…	{At2g01140; KOG1557 Fructose-biphosphate aldolase G Carbohydrate transport and metabolism ;}	{GO:0004332; fructose-bisphosphate aldolase activity; molecular_function GO:0006096; glycolysis; biological_process}	{XM_010676045.2; PREDICTED: Beta vulgaris subsp. vulgaris fructose-bisphosphate aldolase 3, chloroplastic (LOC104890526), transcript variant X3, mRNA}	{PF00274:Fructose-bisphosphate aldolase class-I}
transcript_HQ_SAB_transcript23560/f2p0/1401	-0.58323	3.7935e-09	1.4602e-08	{XP_010684951.1; PREDICTED: Alcohol dehydrogenase 3 [Beta vulgaris subsp. vulgaris]}	{sp|P28032|ADH2_SOLLC; Alcohol dehydrogenase 2 OS=Solanum lycopersicum GN=ADH2 PE=2 SV=2}	{aip:107625554; K18857 ADH1 Alcohol dehydrogenase class-P 1.1.1.1 ko00010; Metabolism; Carbohydrate metabolism; Glycolysis / gluconeogenesis | ko00071; Metabolism; Lipid metabolism; Fatty acid degradation | ko00592; Metabolism; Lipid metabolism; alpha-Linolenic acid metabolism | ko00350; Metabolism; Amino acid metabolism; Tyrosine metabolism}	{At1g77120; KOG0022 Alcohol dehydrogenase, class III Q Secondary metabolites biosynthesis, transport and catabolism ;}	{GO:0051287; NAD binding; molecular_function GO:0055114; oxidation-reduction process; biological_process GO:0006813; potassium ion transport; biological_process}	{XM_010686649.2; PREDICTED: Beta vulgaris subsp. vulgaris Alcohol dehydrogenase 3 (LOC104899454), mRNA}	{PF00107:Zinc-binding dehydrogenase PF02826:D-isomer specific 2-hydroxyacid dehydrogenase, NAD binding domain PF02254:TrkA-N domain PF08240:Alcohol dehydrogenase GroES-like domain}
transcript_HQ_SAB_transcript22987/f2p0/1436	-1.0965	2.2026e-09	8.5909e-09	{KNA12167.1; hypothetical protein SOVF_128330 [Spinacia oleracea]}	{sp|P17648|ADH_FRAAN; Alcohol dehydrogenase OS=Fragaria ananassa GN=ADH PE=3 SV=2}	{bvg:104895143; K18857 ADH1 Alcohol dehydrogenase class-P 1.1.1.1 ko00010; Metabolism; Carbohydrate metabolism; Glycolysis / gluconeogenesis | ko00071; Metabolism; Lipid metabolism; Fatty acid degradation | ko00592; Metabolism; Lipid metabolism; alpha-Linolenic acid metabolism | ko00350; Metabolism; Amino acid metabolism; Tyrosine metabolism}	{At1g77120; KOG0022 Alcohol dehydrogenase, class III Q Secondary metabolites biosynthesis, transport and catabolism ;}	{GO:0016616; oxidoreductase activity, acting on the CH-OH group of donors, NAD or NADP as acceptor; molecular_function GO:0055114; oxidation-reduction process; biological_process GO:0051287; NAD binding; molecular_function}	{XM_010681574.2; PREDICTED: Beta vulgaris subsp. vulgaris Alcohol dehydrogenase 3 (LOC104895143), mRNA}	{PF03721:UDP-glucose/GDP-mannose dehydrogenase family, NAD binding domain PF00107:Zinc-binding dehydrogenase}
transcript_HQ_SAB_transcript2259/f2p0/3384	0.96118	6.4494e-05	0.00017177	{XP_010695328.1; PREDICTED: isoamylase 2, chloroplastic [Beta vulgaris subsp. vulgaris]}	{sp|Q8L735|ISOA2_ARATH; Isoamylase 2, chloroplastic OS=Arabidopsis thaliana GN=ISA2 PE=1 SV=2}	{pper:PRUPE_ppa001199mg; K01214 ISA, treX isoamylase 3.2.1.68 ko00500; Metabolism; Carbohydrate metabolism; Starch and sucrose metabolism}	{At1g03310; KOG0470 1,4-alpha-glucan branching enzyme/starch branching enzyme II G Carbohydrate transport and metabolism ;}	{GO:0005975; carbohydrate metabolic process; biological_process GO:0004553; hydrolase activity, hydrolyzing O-glycosyl compounds; molecular_function GO:0003824; NA}	{XM_010697029.2; PREDICTED: Beta vulgaris subsp. vulgaris isoamylase 2, chloroplastic (LOC104907991), transcript variant X2, mRNA}	{PF00128:Alpha amylase, catalytic domain PF02922:Carbohydrate-binding module 48 (Isoamylase N-terminal domain)}
transcript_HQ_SAB_transcript22589/f2p0/1469	2.6915	1.7265e-266	1.5656e-264	{KNA05271.1; hypothetical protein SOVF_191970 [Spinacia oleracea]}	{sp|O23553|BAM3_ARATH; Beta-amylase 3, chloroplastic OS=Arabidopsis thaliana GN=BAM3 PE=1 SV=3}	{jcu:105636642; K01177 E3.2.1.2 Beta-amylase 3.2.1.2 ko00500; Metabolism; Carbohydrate metabolism; Starch and sucrose metabolism}	{NA}	{GO:0000272; polysaccharide catabolic process; biological_process GO:0016161; Beta-amylase activity; molecular_function}	{XM_010697150.2; PREDICTED: Beta vulgaris subsp. vulgaris Beta-amylase 3, chloroplastic (LOC104908081), mRNA}	{PF01373:Glycosyl hydrolase family 14}
transcript_HQ_SAB_transcript2241/f2p0/3502	0.67717	0.0045949	0.0095431	{XP_010675268.1; PREDICTED: alpha,alpha-trehalose-phosphate synthase [UDP-forming] 1 [Beta vulgaris subsp. vulgaris]}	{sp|Q9SYM4|TPS1_ARATH; Alpha,alpha-trehalose-phosphate synthase [UDP-forming] 1 OS=Arabidopsis thaliana GN=TPS1 PE=1 SV=1}	{bvg:104891294; K16055 TPS trehalose 6-phosphate synthase/phosphatase [EC:2.4.1.15 3.1.3.12] 2.4.1.15,3.1.3.12 ko00500; Metabolism; Carbohydrate metabolism; Starch and sucrose metabolism}	{At1g78580; KOG1050 Trehalose-6-phosphate synthase component TPS1 and related subunits G Carbohydrate transport and metabolism ;}	{GO:0005992; trehalose biosynthetic process; biological_process GO:0003824; NA}	{XM_010676966.2; PREDICTED: Beta vulgaris subsp. vulgaris alpha,alpha-trehalose-phosphate synthase [UDP-forming] 1 (LOC104891294), mRNA}	{PF00982:Glycosyltransferase family 20 PF02358:Trehalose-phosphatase}
transcript_HQ_SAB_transcript22365/f5p0/1483	#NAME?	4.401e-16	2.4638e-15	{XP_019105379.1; PREDICTED: galactinol synthase 1 [Beta vulgaris subsp. vulgaris]}	{sp|O22893|GOLS1_ARATH; Galactinol synthase 1 OS=Arabidopsis thaliana GN=GOLS1 PE=1 SV=1}	{bvg:104894821; K18819 GOLS inositol 3-alpha-galactosyltransferase 2.4.1.123 ko00052; Metabolism; Carbohydrate metabolism; galactose metabolism}	{At2g47180; KOG1950 Glycosyl transferase, family 8 - glycogenin G Carbohydrate transport and metabolism ;}	{GO:0016757; transferase activity, transferring glycosyl groups; molecular_function GO:0006486; protein glycosylation; biological_process}	{XM_019249834.1; PREDICTED: Beta vulgaris subsp. vulgaris galactinol synthase 1 (LOC104894821), mRNA}	{PF11051:Mannosyltransferase putative PF01501:Glycosyl transferase family 8}
transcript_HQ_SAB_transcript22335/f2p0/1487	2.0398	4.0981e-60	6.8123e-59	{XP_010674148.1; PREDICTED: probable ribose-5-phosphate isomerase 2 [Beta vulgaris subsp. vulgaris]}	{sp|Q9ZU38|RPI2_ARATH; Probable ribose-5-phosphate isomerase 2 OS=Arabidopsis thaliana GN=RPI2 PE=1 SV=1}	{bvg:104890380; K01807 rpiA ribose 5-phosphate isomerase A 5.3.1.6 ko01200; Metabolism; Global and overview maps; Carbon metabolism | ko01230; Metabolism; Global and overview maps; Biosynthesis of amino acids | ko00030; Metabolism; Carbohydrate metabolism; pentose phosphate pathway | ko00710; Metabolism; Energy metabolism; Carbon fixation in photosynthetic organisms}	{At2g01290; KOG3075 Ribose 5-phosphate isomerase G Carbohydrate transport and metabolism ;}	{GO:0004751; ribose-5-phosphate isomerase activity; molecular_function GO:0009052; pentose-phosphate shunt, non-oxidative branch; biological_process}	{NA}	{PF06026:Ribose 5-phosphate isomerase A (phosphoriboisomerase A)}
transcript_HQ_SAB_transcript22319/f7p0/1466	2.7224	3.4855e-05	9.5912e-05	{XP_019105379.1; PREDICTED: galactinol synthase 1 [Beta vulgaris subsp. vulgaris]}	{sp|O22893|GOLS1_ARATH; Galactinol synthase 1 OS=Arabidopsis thaliana GN=GOLS1 PE=1 SV=1}	{bvg:104894821; K18819 GOLS inositol 3-alpha-galactosyltransferase 2.4.1.123 ko00052; Metabolism; Carbohydrate metabolism; galactose metabolism}	{At2g47180; KOG1950 Glycosyl transferase, family 8 - glycogenin G Carbohydrate transport and metabolism ;}	{GO:0006486; protein glycosylation; biological_process GO:0016757; transferase activity, transferring glycosyl groups; molecular_function}	{XM_019249834.1; PREDICTED: Beta vulgaris subsp. vulgaris galactinol synthase 1 (LOC104894821), mRNA}	{PF01501:Glycosyl transferase family 8 PF11051:Mannosyltransferase putative}
transcript_HQ_SAB_transcript22188/f3p0/1494	1.6552	0.0015061	0.0033679	{XP_010680759.1; PREDICTED: chitotriosidase-1 [Beta vulgaris subsp. vulgaris]}	{sp|C5P230|CHI1_COCP7; Endochitinase 1 OS=Coccidioides posadasii (strain C735) GN=CTS1 PE=3 SV=1}	{ini:109177059; K01183 E3.2.1.14 chitinase 3.2.1.14 ko00520; Metabolism; Carbohydrate metabolism; Amino sugar and nucleotide sugar metabolism}	{At4g19810; KOG2806 Chitinase G Carbohydrate transport and metabolism ;}	{GO:0043401; steroid hormone mediated signaling pathway; biological_process GO:0005975; carbohydrate metabolic process; biological_process GO:0005634; nucleus; cellular_component GO:0006355; regulation of transcription, DNA-dependent; biological_process GO:0004553; hydrolase activity, hydrolyzing O-glycosyl compounds; molecular_function GO:0003677; DNA binding; molecular_function GO:0030284; estr…	{XM_010682457.2; PREDICTED: Beta vulgaris subsp. vulgaris chitotriosidase-1 (LOC104895832), mRNA}	{PF00704:Glycosyl hydrolases family 18 PF02159:Oestrogen receptor}
transcript_HQ_SAB_transcript22078/f2p0/1487	-5.5148	5.1615e-14	2.6341e-13	{XP_017438619.1; PREDICTED: sorbitol dehydrogenase [Vigna angularis]}	{sp|Q1PSI9|IDND_VITVI; L-idonate 5-dehydrogenase OS=Vitis vinifera GN=VIT_16s0100g00290 PE=1 SV=2}	{var:108344681; K00008 SORD, gutB L-iditol 2-dehydrogenase 1.1.1.14 ko00040; Metabolism; Carbohydrate metabolism; Pentose and glucuronate interconversions | ko00051; Metabolism; Carbohydrate metabolism; Fructose and mannose metabolism}	{At5g51970; KOG0024 Sorbitol dehydrogenase Q Secondary metabolites biosynthesis, transport and catabolism ;}	{GO:0055114; oxidation-reduction process; biological_process}	{XM_010695158.2; PREDICTED: Beta vulgaris subsp. vulgaris sorbitol dehydrogenase (LOC104906418), mRNA}	{PF00107:Zinc-binding dehydrogenase}
transcript_HQ_SAB_transcript22077/f5p0/1471	0.73759	2.3975e-16	1.3569e-15	{XP_010680759.1; PREDICTED: chitotriosidase-1 [Beta vulgaris subsp. vulgaris]}	{sp|C5P230|CHI1_COCP7; Endochitinase 1 OS=Coccidioides posadasii (strain C735) GN=CTS1 PE=3 SV=1}	{ini:109177059; K01183 E3.2.1.14 chitinase 3.2.1.14 ko00520; Metabolism; Carbohydrate metabolism; Amino sugar and nucleotide sugar metabolism}	{At4g19810; KOG2806 Chitinase G Carbohydrate transport and metabolism ;}	{GO:0005496; steroid binding; molecular_function GO:0030284; estrogen receptor activity; molecular_function GO:0005634; nucleus; cellular_component GO:0043401; steroid hormone mediated signaling pathway; biological_process GO:0005975; carbohydrate metabolic process; biological_process GO:0006355; regulation of transcription, DNA-dependent; biological_process GO:0003677; DNA binding; molecular_fun…	{XM_010682457.2; PREDICTED: Beta vulgaris subsp. vulgaris chitotriosidase-1 (LOC104895832), mRNA}	{PF02159:Oestrogen receptor PF00704:Glycosyl hydrolases family 18}
transcript_HQ_SAB_transcript22075/f2p0/1491	Inf	0.0011224	0.0025571	{JAT66456.1; Enolase [Anthurium amnicola]}	{sp|Q9HDT3|ENO_ALTAL; Enolase OS=Alternaria alternata GN=ENO PE=1 SV=2}	{mpp:MICPUCDRAFT_43957; K01689 ENO, eno enolase 4.2.1.11 ko01200; Metabolism; Global and overview maps; Carbon metabolism | ko01230; Metabolism; Global and overview maps; Biosynthesis of amino acids | ko00010; Metabolism; Carbohydrate metabolism; Glycolysis / gluconeogenesis | ko00680; Metabolism; Energy metabolism; Methane metabolism | ko03018; Genetic Information Processing; Folding, sorting an…	{YGR254w; KOG2670 Enolase G Carbohydrate transport and metabolism ;}	{NA}	{BT102696.1; Picea glauca clone GQ02011_F06 mRNA sequence}	{NA}
transcript_HQ_SAB_transcript21974/f5p0/1479	-0.48074	9.6609e-05	0.00025193	{XP_010674554.1; PREDICTED: galactinol synthase 2 [Beta vulgaris subsp. vulgaris]}	{sp|C7G304|GOLS2_SOLLC; Galactinol synthase 2 OS=Solanum lycopersicum GN=GOLS2 PE=2 SV=1}	{bvg:104890675; K18819 GOLS inositol 3-alpha-galactosyltransferase 2.4.1.123 ko00052; Metabolism; Carbohydrate metabolism; galactose metabolism}	{At1g56600; KOG1950 Glycosyl transferase, family 8 - glycogenin G Carbohydrate transport and metabolism ;}	{GO:0016757; transferase activity, transferring glycosyl groups; molecular_function GO:0006486; protein glycosylation; biological_process}	{XM_010676252.2; PREDICTED: Beta vulgaris subsp. vulgaris galactinol synthase 2 (LOC104890675), mRNA}	{PF01501:Glycosyl transferase family 8 PF11051:Mannosyltransferase putative}
transcript_HQ_SAB_transcript21753/f6p0/1484	-0.35383	1.2334e-27	1.0321e-26	{KNA14982.1; hypothetical protein SOVF_102320 [Spinacia oleracea]}	{sp|Q8RU27|UPTG2_SOLTU; Alpha-1,4-glucan-protein synthase [UDP-forming] 2 OS=Solanum tuberosum GN=UPTG2 PE=1 SV=1}	{gmx:100788017; K13379 RGP, UTM reversibly glycosylated polypeptide / UDP-arabinopyranose mutase [EC:2.4.1.- 5.4.99.30] 2.4.1.-,5.4.99.30 ko00520; Metabolism; Carbohydrate metabolism; Amino sugar and nucleotide sugar metabolism}	{NA}	{GO:0016866; intramolecular transferase activity; molecular_function GO:0030244; cellulose biosynthetic process; biological_process}	{XM_010696958.2; PREDICTED: Beta vulgaris subsp. vulgaris alpha-1,4-glucan-protein synthase [UDP-forming] 2 (LOC104907929), mRNA}	{PF03214:Reversibly glycosylated polypeptide}
transcript_HQ_SAB_transcript21566/f5p0/1530	-2.4338	1.2344e-10	5.2401e-10	{XP_010693460.1; PREDICTED: sorbitol dehydrogenase [Beta vulgaris subsp. vulgaris]}	{sp|Q9FJ95|DHSO_ARATH; Sorbitol dehydrogenase OS=Arabidopsis thaliana GN=SDH PE=1 SV=1}	{nnu:104596194; K00008 SORD, gutB L-iditol 2-dehydrogenase 1.1.1.14 ko00040; Metabolism; Carbohydrate metabolism; Pentose and glucuronate interconversions | ko00051; Metabolism; Carbohydrate metabolism; Fructose and mannose metabolism}	{At5g51970; KOG0024 Sorbitol dehydrogenase Q Secondary metabolites biosynthesis, transport and catabolism ;}	{GO:0055114; oxidation-reduction process; biological_process GO:0016491; oxidoreductase activity; molecular_function}	{XM_010695158.2; PREDICTED: Beta vulgaris subsp. vulgaris sorbitol dehydrogenase (LOC104906418), mRNA}	{PF07992:Pyridine nucleotide-disulphide oxidoreductase PF00107:Zinc-binding dehydrogenase PF08240:Alcohol dehydrogenase GroES-like domain}
transcript_HQ_SAB_transcript21219/f4p0/1527	Inf	0.00021256	0.00053098	{JAT59808.1; Enolase, partial [Anthurium amnicola]}	{sp|P15007|ENO_DROME; Enolase OS=Drosophila melanogaster GN=Eno PE=1 SV=2}	{cic:CICLE_v10020008mg; K01689 ENO, eno enolase 4.2.1.11 ko01200; Metabolism; Global and overview maps; Carbon metabolism | ko01230; Metabolism; Global and overview maps; Biosynthesis of amino acids | ko00010; Metabolism; Carbohydrate metabolism; Glycolysis / gluconeogenesis | ko00680; Metabolism; Energy metabolism; Methane metabolism | ko03018; Genetic Information Processing; Folding, sorting an…	{7296048; KOG2670 Enolase G Carbohydrate transport and metabolism ;}	{NA}	{XM_011103184.1; PREDICTED: Sesamum indicum enolase-like (LOC105179531), mRNA}	{NA}
transcript_HQ_SAB_transcript21205/f5p0/1534	-0.45041	1.2112e-17	7.2721e-17	{KNA03849.1; hypothetical protein SOVF_205230 [Spinacia oleracea]}	{sp|O65581|ALFC5_ARATH; Fructose-bisphosphate aldolase 5, cytosolic OS=Arabidopsis thaliana GN=FBA5 PE=1 SV=1}	{bvg:104892005; K01623 ALDO fructose-bisphosphate aldolase, class I 4.1.2.13 ko01200; Metabolism; Global and overview maps; Carbon metabolism | ko01230; Metabolism; Global and overview maps; Biosynthesis of amino acids | ko00010; Metabolism; Carbohydrate metabolism; Glycolysis / Gluconeogenesis | ko00030; Metabolism; Carbohydrate metabolism; Pentose phosphate pathway | ko00051; Metabolism; Carboh…	{At4g26530; KOG1557 Fructose-biphosphate aldolase G Carbohydrate transport and metabolism ;}	{GO:0006096; glycolysis; biological_process GO:0004332; fructose-bisphosphate aldolase activity; molecular_function}	{XM_010677812.2; PREDICTED: Beta vulgaris subsp. vulgaris fructose-bisphosphate aldolase 5, cytosolic (LOC104892005), mRNA}	{PF00274:Fructose-bisphosphate aldolase class-I}
transcript_HQ_SAB_transcript21191/f2p0/1545	-0.49971	0.00014665	0.0003739	{KNA12167.1; hypothetical protein SOVF_128330 [Spinacia oleracea]}	{sp|Q0ITW7|ADH2_ORYSJ; Alcohol dehydrogenase 2 OS=Oryza sativa subsp. japonica GN=ADH2 PE=2 SV=2}	{bvg:104895143; K18857 ADH1 Alcohol dehydrogenase class-P 1.1.1.1 ko00010; Metabolism; Carbohydrate metabolism; Glycolysis / gluconeogenesis | ko00071; Metabolism; Lipid metabolism; Fatty acid degradation | ko00592; Metabolism; Lipid metabolism; alpha-Linolenic acid metabolism | ko00350; Metabolism; Amino acid metabolism; Tyrosine metabolism}	{At1g77120; KOG0022 Alcohol dehydrogenase, class III Q Secondary metabolites biosynthesis, transport and catabolism ;}	{GO:0055114; oxidation-reduction process; biological_process GO:0051287; NAD binding; molecular_function GO:0016616; oxidoreductase activity, acting on the CH-OH group of donors, NAD or NADP as acceptor; molecular_function}	{XM_010681574.2; PREDICTED: Beta vulgaris subsp. vulgaris Alcohol dehydrogenase 3 (LOC104895143), mRNA}	{PF08240:Alcohol dehydrogenase GroES-like domain PF03721:UDP-glucose/GDP-mannose dehydrogenase family, NAD binding domain PF00107:Zinc-binding dehydrogenase}
transcript_HQ_SAB_transcript21114/f4p0/1548	-1.7305	8.6608e-162	4.0754e-160	{KNA12167.1; hypothetical protein SOVF_128330 [Spinacia oleracea]}	{sp|Q0ITW7|ADH2_ORYSJ; Alcohol dehydrogenase 2 OS=Oryza sativa subsp. japonica GN=ADH2 PE=2 SV=2}	{bvg:104895143; K18857 ADH1 Alcohol dehydrogenase class-P 1.1.1.1 ko00010; Metabolism; Carbohydrate metabolism; Glycolysis / gluconeogenesis | ko00071; Metabolism; Lipid metabolism; Fatty acid degradation | ko00592; Metabolism; Lipid metabolism; alpha-Linolenic acid metabolism | ko00350; Metabolism; Amino acid metabolism; Tyrosine metabolism}	{At1g77120; KOG0022 Alcohol dehydrogenase, class III Q Secondary metabolites biosynthesis, transport and catabolism ;}	{GO:0016616; oxidoreductase activity, acting on the CH-OH group of donors, NAD or NADP as acceptor; molecular_function GO:0055114; oxidation-reduction process; biological_process GO:0051287; NAD binding; molecular_function}	{XM_010681574.2; PREDICTED: Beta vulgaris subsp. vulgaris Alcohol dehydrogenase 3 (LOC104895143), mRNA}	{PF08240:Alcohol dehydrogenase GroES-like domain PF03721:UDP-glucose/GDP-mannose dehydrogenase family, NAD binding domain PF00107:Zinc-binding dehydrogenase}
transcript_HQ_SAB_transcript21058/f2p0/1553	-0.81347	0.00021712	0.00054178	{XP_010678478.1; PREDICTED: ribulose-phosphate 3-epimerase, chloroplastic [Beta vulgaris subsp. vulgaris]}	{sp|Q43157|RPE_SPIOL; Ribulose-phosphate 3-epimerase, chloroplastic OS=Spinacia oleracea GN=RPE PE=1 SV=1}	{bvg:104894019; K01783 rpe, RPE ribulose-phosphate 3-epimerase 5.1.3.1 ko01200; Metabolism; Global and overview maps; Carbon metabolism | ko01230; Metabolism; Global and overview maps; Biosynthesis of amino acids | ko00030; Metabolism; Carbohydrate metabolism; Pentose phosphate pathway | ko00040; Metabolism; Carbohydrate metabolism; Pentose and glucuronate interconversions | ko00710; Metabolism; …	{At5g61410; KOG3111 D-ribulose-5-phosphate 3-epimerase G Carbohydrate transport and metabolism ;}	{GO:0003824; NA GO:0007339; binding of sperm to zona pellucida; biological_process GO:0055114; oxidation-reduction process; biological_process GO:0016857; racemase and epimerase activity, acting on carbohydrates and derivatives; molecular_function GO:0005975; carbohydrate metabolic process; biological_process GO:0005576; NA}	{XM_010680176.2; PREDICTED: Beta vulgaris subsp. vulgaris ribulose-phosphate 3-epimerase, chloroplastic (LOC104894019), mRNA}	{PF00834:Ribulose-phosphate 3 epimerase family PF00478:IMP dehydrogenase / GMP reductase domain PF07354:Zona-pellucida-binding protein (Sp38)}
transcript_HQ_SAB_transcript20899/f2p0/1561	-0.72865	3.3388e-17	1.9721e-16	{OAY80614.1; UDP-arabinopyranose mutase 1 [Ananas comosus]}	{sp|Q8RU27|UPTG2_SOLTU; Alpha-1,4-glucan-protein synthase [UDP-forming] 2 OS=Solanum tuberosum GN=UPTG2 PE=1 SV=1}	{mus:103974511; K13379 RGP, UTM reversibly glycosylated polypeptide / UDP-arabinopyranose mutase [EC:2.4.1.- 5.4.99.30] 2.4.1.-,5.4.99.30 ko00520; Metabolism; Carbohydrate metabolism; Amino sugar and nucleotide sugar metabolism}	{NA}	{GO:0030244; cellulose biosynthetic process; biological_process GO:0016866; intramolecular transferase activity; molecular_function}	{XM_010696958.2; PREDICTED: Beta vulgaris subsp. vulgaris alpha-1,4-glucan-protein synthase [UDP-forming] 2 (LOC104907929), mRNA}	{PF03214:Reversibly glycosylated polypeptide}
transcript_HQ_SAB_transcript20875/f2p0/1568	0.8852	2.3041e-08	8.3873e-08	{KNA18884.1; hypothetical protein SOVF_064080 [Spinacia oleracea]}	{sp|Q8VYG2|GALAK_ARATH; Galacturonokinase OS=Arabidopsis thaliana GN=GALAK PE=1 SV=1}	{vvi:100261773; K18677 GALAK galacturonokinase 2.7.1.44 ko00520; Metabolism; Carbohydrate metabolism; Amino sugar and nucleotide sugar metabolism}	{At3g10700; KOG0631 Galactokinase G Carbohydrate transport and metabolism ;}	{GO:0005524; ATP binding; molecular_function}	{XM_010690136.2; PREDICTED: Beta vulgaris subsp. vulgaris galacturonokinase (LOC104902376), mRNA}	{PF00288:GHMP kinases N terminal domain}
transcript_HQ_SAB_transcript20706/f2p0/1580	0.12654	0.01368	0.026068	{XP_010678064.1; PREDICTED: fructose-1,6-bisphosphatase, chloroplastic [Beta vulgaris subsp. vulgaris]}	{sp|P22418|F16P1_SPIOL; Fructose-1,6-bisphosphatase, chloroplastic OS=Spinacia oleracea PE=1 SV=2}	{bvg:104893633; K03841 FBP, fbp fructose-1,6-bisphosphatase I 3.1.3.11 ko01200; Metabolism; Global and overview maps; Carbon metabolism | ko00010; Metabolism; Carbohydrate metabolism; Glycolysis / Gluconeogenesis | ko00030; Metabolism; Carbohydrate metabolism; Pentose phosphate pathway | ko00051; Metabolism; Carbohydrate metabolism; Fructose and mannose metabolism | ko00710; Metabolism; Energy me…	{At3g54050; KOG1458 Fructose-1,6-bisphosphatase G Carbohydrate transport and metabolism ;}	{NA}	{L76555.1; Spinacia oleracea fructose-1,6-bisphosphatase mRNA, chloroplast gene encoding chloroplast protein, complete cds}	{NA}
transcript_HQ_SAB_transcript20616/f2p0/1576	-2.4463	6.4116e-07	2.0886e-06	{XP_010672242.1; PREDICTED: endochitinase [Beta vulgaris subsp. vulgaris]}	{sp|Q688M5|CHI9_ORYSJ; Chitinase 9 OS=Oryza sativa subsp. japonica GN=Cht9 PE=2 SV=1}	{bvg:104888840; K20547 CHIB basic endochitinase B 3.2.1.14 ko00520; Metabolism; Carbohydrate metabolism; Amino sugar and nucleotide sugar metabolism | ko04016; Environmental Information Processing; Signal transduction; MAPK signaling pathway - plant}	{At3g12500; KOG4742 Predicted chitinase R General function prediction only ;}	{GO:0006032; chitin catabolic process; biological_process GO:0016998; cell wall macromolecule catabolic process; biological_process GO:0008061; chitin binding; molecular_function GO:0004568; chitinase activity; molecular_function}	{XM_010114956.1; Morus notabilis Osmotin-like protein OSM34 partial mRNA}	{PF00187:Chitin recognition protein PF00182:Chitinase class I}
transcript_HQ_SAB_transcript20396/f2p0/1597	-3.0456	2.2726e-229	1.6557e-227	{XP_010680759.1; PREDICTED: chitotriosidase-1 [Beta vulgaris subsp. vulgaris]}	{sp|Q95M17|CHIA_BOVIN; Acidic mammalian chitinase OS=Bos taurus GN=CHIA PE=1 SV=1}	{ini:109177059; K01183 E3.2.1.14 chitinase 3.2.1.14 ko00520; Metabolism; Carbohydrate metabolism; Amino sugar and nucleotide sugar metabolism}	{At4g19810; KOG2806 Chitinase G Carbohydrate transport and metabolism ;}	{GO:0004553; hydrolase activity, hydrolyzing O-glycosyl compounds; molecular_function GO:0005975; carbohydrate metabolic process; biological_process}	{XM_010682457.2; PREDICTED: Beta vulgaris subsp. vulgaris chitotriosidase-1 (LOC104895832), mRNA}	{PF00704:Glycosyl hydrolases family 18}
transcript_HQ_SAB_transcript20207/f2p0/1621	0.68375	3.4018e-12	1.5814e-11	{XP_010693460.1; PREDICTED: sorbitol dehydrogenase [Beta vulgaris subsp. vulgaris]}	{sp|Q9FJ95|DHSO_ARATH; Sorbitol dehydrogenase OS=Arabidopsis thaliana GN=SDH PE=1 SV=1}	{nnu:104596194; K00008 SORD, gutB L-iditol 2-dehydrogenase 1.1.1.14 ko00040; Metabolism; Carbohydrate metabolism; Pentose and glucuronate interconversions | ko00051; Metabolism; Carbohydrate metabolism; Fructose and mannose metabolism}	{At5g51970; KOG0024 Sorbitol dehydrogenase Q Secondary metabolites biosynthesis, transport and catabolism ;}	{GO:0055114; oxidation-reduction process; biological_process GO:0016491; oxidoreductase activity; molecular_function}	{XM_010695158.2; PREDICTED: Beta vulgaris subsp. vulgaris sorbitol dehydrogenase (LOC104906418), mRNA}	{PF08240:Alcohol dehydrogenase GroES-like domain PF07992:Pyridine nucleotide-disulphide oxidoreductase PF00107:Zinc-binding dehydrogenase}
transcript_HQ_SAB_transcript2010/f4p0/3546	0.9355	1.8878e-12	8.894e-12	{KMT02758.1; hypothetical protein BVRB_8g193450 [Beta vulgaris subsp. vulgaris]}	{sp|P49031|SPSA_BETVU; Probable sucrose-phosphate synthase OS=Beta vulgaris GN=SPS PE=2 SV=1}	{cit:102618138; K00696 E2.4.1.14 sucrose-phosphate synthase 2.4.1.14 ko00500; Metabolism; Carbohydrate metabolism; Starch and sucrose metabolism}	{At5g20280; KOG0853 Glycosyltransferase M Cell wall/membrane/envelope biogenesis ;}	{GO:0005985; sucrose metabolic process; biological_process GO:0016157; sucrose synthase activity; molecular_function}	{NM_001303068.1; Beta vulgaris subsp. vulgaris probable sucrose-phosphate synthase (SBSPS1), mRNA}	{PF00862:Sucrose synthase}
transcript_HQ_SAB_transcript20060/f5p0/1614	-0.74503	0.019324	0.035777	{KNA12044.1; hypothetical protein SOVF_129410 [Spinacia oleracea]}	{sp|Q9C6Z3|ODPB2_ARATH; Pyruvate dehydrogenase E1 component subunit beta-2, chloroplastic OS=Arabidopsis thaliana GN=PDH-E1 BETA PE=2 SV=1}	{csv:101204247; K00162 PDHB, pdhB pyruvate dehydrogenase E1 component beta subunit 1.2.4.1 ko01200; Metabolism; Global and overview maps; Carbon metabolism | ko00010; Metabolism; Carbohydrate metabolism; Glycolysis / gluconeogenesis | ko00020; Metabolism; Carbohydrate metabolism; Citrate cycle (TCA cycle) | ko00620; Metabolism; Carbohydrate metabolism; Pyruvate metabolism | ko04066; Environmental…	{At1g30120; KOG0524 Pyruvate dehydrogenase E1, beta subunit C Energy production and conversion ;}	{NA}	{XM_019247459.1; PREDICTED: Beta vulgaris subsp. vulgaris pyruvate dehydrogenase E1 component subunit beta-3, chloroplastic (LOC104883853), mRNA}	{NA}
transcript_HQ_SAB_transcript19982/f2p0/1618	-0.85662	8.4538e-29	7.3442e-28	{KNA08949.1; hypothetical protein SOVF_158110 [Spinacia oleracea]}	{sp|P29356|ALF_SPIOL; Fructose-bisphosphate aldolase, cytoplasmic isozyme OS=Spinacia oleracea PE=2 SV=1}	{ats:F775_32635; K01623 ALDO fructose-bisphosphate aldolase, class I 4.1.2.13 ko01200; Metabolism; Global and overview maps; Carbon metabolism | ko01230; Metabolism; Global and overview maps; Biosynthesis of amino acids | ko00010; Metabolism; Carbohydrate metabolism; Glycolysis / Gluconeogenesis | ko00030; Metabolism; Carbohydrate metabolism; Pentose phosphate pathway | ko00051; Metabolism; Carbo…	{At2g36460; KOG1557 Fructose-biphosphate aldolase G Carbohydrate transport and metabolism ;}	{GO:0004332; fructose-bisphosphate aldolase activity; molecular_function GO:0006096; glycolysis; biological_process}	{XM_010685561.2; PREDICTED: Beta vulgaris subsp. vulgaris fructose-bisphosphate aldolase, cytoplasmic isozyme (LOC104898474), mRNA}	{PF00274:Fructose-bisphosphate aldolase class-I}
transcript_HQ_SAB_transcript19905/f4p0/1621	Inf	6.6877e-08	2.3609e-07	{XP_017617658.1; PREDICTED: acidic mammalian chitinase-like [Gossypium arboreum]}	{sp|Q2PQM7|IDGF4_GLOMM; Chitinase-like protein Idgf4 OS=Glossina morsitans morsitans GN=Idgf4 PE=2 SV=1}	{jcu:105633606; K01183 E3.2.1.14 chitinase 3.2.1.14 ko00520; Metabolism; Carbohydrate metabolism; Amino sugar and nucleotide sugar metabolism}	{7291098; KOG2806 Chitinase G Carbohydrate transport and metabolism ;}	{GO:0004553; hydrolase activity, hydrolyzing O-glycosyl compounds; molecular_function GO:0005975; carbohydrate metabolic process; biological_process}	{NA}	{PF00704:Glycosyl hydrolases family 18}
transcript_HQ_SAB_transcript19684/f3p0/1640	-1.1755	2.9082e-31	2.6973e-30	{XP_010680570.1; PREDICTED: probable trehalose-phosphate phosphatase I [Beta vulgaris subsp. vulgaris]}	{sp|Q5HZ05|TPPJ_ARATH; Probable trehalose-phosphate phosphatase J OS=Arabidopsis thaliana GN=TPPJ PE=1 SV=1}	{jcu:105650735; K01087 otsB trehalose 6-phosphate phosphatase 3.1.3.12 ko00500; Metabolism; Carbohydrate metabolism; Starch and sucrose metabolism}	{At5g65140; KOG1050 Trehalose-6-phosphate synthase component TPS1 and related subunits G Carbohydrate transport and metabolism ;}	{GO:0003824; NA GO:0005992; trehalose biosynthetic process; biological_process}	{XM_010682268.2; PREDICTED: Beta vulgaris subsp. vulgaris probable trehalose-phosphate phosphatase I (LOC104895698), mRNA}	{PF02358:Trehalose-phosphatase}
transcript_HQ_SAB_transcript19427/f5p0/1644	-2.168	7.4815e-23	5.432e-22	{XP_010683784.1; PREDICTED: fructose-bisphosphate aldolase 3, chloroplastic [Beta vulgaris subsp. vulgaris]}	{sp|Q9ZU52|ALFP3_ARATH; Fructose-bisphosphate aldolase 3, chloroplastic OS=Arabidopsis thaliana GN=FBA3 PE=1 SV=1}	{rcu:8275109; K01623 ALDO fructose-bisphosphate aldolase, class I 4.1.2.13 ko01200; Metabolism; Global and overview maps; Carbon metabolism | ko01230; Metabolism; Global and overview maps; Biosynthesis of amino acids | ko00010; Metabolism; Carbohydrate metabolism; Glycolysis / Gluconeogenesis | ko00030; Metabolism; Carbohydrate metabolism; Pentose phosphate pathway | ko00051; Metabolism; Carbohyd…	{At2g01140; KOG1557 Fructose-biphosphate aldolase G Carbohydrate transport and metabolism ;}	{GO:0004332; fructose-bisphosphate aldolase activity; molecular_function GO:0006096; glycolysis; biological_process}	{XM_010685482.2; PREDICTED: Beta vulgaris subsp. vulgaris fructose-bisphosphate aldolase 3, chloroplastic (LOC104898399), mRNA}	{PF00274:Fructose-bisphosphate aldolase class-I}
transcript_HQ_SAB_transcript19425/f2p0/1658	4.0669	1.8395e-67	3.4515e-66	{XP_010684796.1; PREDICTED: Alcohol dehydrogenase class-3 [Beta vulgaris subsp. vulgaris]}	{sp|A2XAZ3|ADHX_ORYSI; Alcohol dehydrogenase class-3 OS=Oryza sativa subsp. indica GN=ADHIII PE=3 SV=1}	{mus:103999478; K00121 frmA, ADH5, adhC S-(hydroxymethyl)glutathione dehydrogenase / Alcohol dehydrogenase [EC:1.1.1.284 1.1.1.1] 1.1.1.284,1.1.1.1 ko01200; Metabolism; Global and overview maps; Carbon metabolism | ko01220; Metabolism; Global and overview maps; Degradation of aromatic compounds | ko00010; Metabolism; Carbohydrate metabolism; Glycolysis / gluconeogenesis | ko00680; Metabolism; Ene…	{At5g43940; KOG0022 Alcohol dehydrogenase, class III Q Secondary metabolites biosynthesis, transport and catabolism ;}	{GO:0016616; oxidoreductase activity, acting on the CH-OH group of donors, NAD or NADP as acceptor; molecular_function GO:0019062; virion attachment to host cell surface receptor; biological_process GO:0007155; cell adhesion; biological_process GO:0055114; oxidation-reduction process; biological_process GO:0051287; NAD binding; molecular_function GO:0019058; viral infectious cycle; biological_pro…	{XM_010686494.2; PREDICTED: Beta vulgaris subsp. vulgaris Alcohol dehydrogenase class-3 (LOC104899321), mRNA}	{PF02254:TrkA-N domain PF08240:Alcohol dehydrogenase GroES-like domain PF03775:Septum formation inhibitor MinC, C-terminal domain PF03721:UDP-glucose/GDP-mannose dehydrogenase family, NAD binding domain PF00107:Zinc-binding dehydrogenase PF01664:Reovirus viral attachment protein sigma 1 PF02826:D-isomer specific 2-hydroxyacid dehydrogenase, NAD binding domain}
transcript_HQ_SAB_transcript19365/f6p0/1652	0.97193	1.3126e-79	2.9161e-78	{XP_010690763.1; PREDICTED: fructose-bisphosphate aldolase 1, chloroplastic [Beta vulgaris subsp. vulgaris]}	{sp|Q944G9|ALFP2_ARATH; Fructose-bisphosphate aldolase 2, chloroplastic OS=Arabidopsis thaliana GN=FBA2 PE=1 SV=2}	{sly:101246870; K01623 ALDO fructose-bisphosphate aldolase, class I 4.1.2.13 ko01200; Metabolism; Global and overview maps; Carbon metabolism | ko01230; Metabolism; Global and overview maps; Biosynthesis of amino acids | ko00010; Metabolism; Carbohydrate metabolism; Glycolysis / Gluconeogenesis | ko00030; Metabolism; Carbohydrate metabolism; Pentose phosphate pathway | ko00051; Metabolism; Carboh…	{At2g01140; KOG1557 Fructose-biphosphate aldolase G Carbohydrate transport and metabolism ;}	{GO:0006096; glycolysis; biological_process GO:0004332; fructose-bisphosphate aldolase activity; molecular_function}	{XM_010692461.2; PREDICTED: Beta vulgaris subsp. vulgaris fructose-bisphosphate aldolase 1, chloroplastic (LOC104904258), mRNA}	{PF00274:Fructose-bisphosphate aldolase class-I}
transcript_HQ_SAB_transcript19183/f2p0/1691	0.27594	3.7677e-08	1.352e-07	{KNA06539.1; hypothetical protein SOVF_179860 [Spinacia oleracea]}	{sp|Q93VR3|GME_ARATH; GDP-mannose 3,5-epimerase OS=Arabidopsis thaliana GN=At5g28840 PE=1 SV=1}	{bvg:104890910; K10046 GME GDP-D-mannose 3', 5'-epimerase [EC:5.1.3.18 5.1.3.-] 5.1.3.18,5.1.3.- ko00053; Metabolism; Carbohydrate metabolism; Ascorbate and aldarate metabolism | ko00520; Metabolism; Carbohydrate metabolism; Amino sugar and nucleotide sugar metabolism}	{At5g28840; KOG1429 dTDP-glucose 4-6-dehydratase/UDP-glucuronic acid decarboxylase GM Carbohydrate transport and metabolism ; Cell wall/membrane/envelope biogenesis ;}	{GO:0050662; coenzyme binding; molecular_function GO:0003824; NA GO:0008839; dihydrodipicolinate reductase activity; molecular_function GO:0016616; oxidoreductase activity, acting on the CH-OH group of donors, NAD or NADP as acceptor; molecular_function GO:0003854; 3-beta-hydroxy-delta5-steroid dehydrogenase activity; molecular_function GO:0055114; oxidation-reduction process; biological_process …	{XM_010676526.2; PREDICTED: Beta vulgaris subsp. vulgaris GDP-mannose 3,5-epimerase 2 (LOC104890910), mRNA}	{PF01370:NAD dependent epimerase/dehydratase family PF01073:3-beta hydroxysteroid dehydrogenase/isomerase family PF00056:lactate/malate dehydrogenase, NAD binding domain PF01113:Dihydrodipicolinate reductase, N-terminus}
transcript_HQ_SAB_transcript19093/f2p0/1670	-0.96744	5.3464e-10	2.1798e-09	{Q9XG99.1; RecName: Full=Ribose-phosphate pyrophosphokinase 2, chloroplastic; AltName: Full=Phosphoribosyl pyrophosphate synthase 2; Flags: Precursor}	{sp|Q9XG99|KPRS2_SPIOL; Ribose-phosphate pyrophosphokinase 2, chloroplastic OS=Spinacia oleracea GN=PRS2 PE=2 SV=1}	{bvg:104892965; K00948 PRPS, prsA ribose-phosphate pyrophosphokinase 2.7.6.1 ko01200; Metabolism; Global and overview maps; Carbon metabolism | ko01230; Metabolism; Global and overview maps; Biosynthesis of amino acids | ko00030; Metabolism; Carbohydrate metabolism; pentose phosphate pathway | ko00230; Metabolism; Nucleotide metabolism; Purine metabolism}	{At1g32380; KOG1448 Ribose-phosphate pyrophosphokinase FE Nucleotide transport and metabolism ; Amino acid transport and metabolism ;}	{GO:0000287; magnesium ion binding; molecular_function GO:0009165; nucleotide biosynthetic process; biological_process GO:0009116; nucleoside metabolic process; biological_process GO:0004749; ribose phosphate diphosphokinase activity; molecular_function}	{XM_010678991.2; PREDICTED: Beta vulgaris subsp. vulgaris ribose-phosphate pyrophosphokinase 2, chloroplastic (LOC104892965), mRNA}	{PF00156:Phosphoribosyl transferase domain PF14572:Phosphoribosyl synthetase-associated domain}
transcript_HQ_SAB_transcript19070/f7p0/1662	0.50482	0.0006653	0.0015632	{KNA03849.1; hypothetical protein SOVF_205230 [Spinacia oleracea]}	{sp|O65581|ALFC5_ARATH; Fructose-bisphosphate aldolase 5, cytosolic OS=Arabidopsis thaliana GN=FBA5 PE=1 SV=1}	{bvg:104892005; K01623 ALDO fructose-bisphosphate aldolase, class I 4.1.2.13 ko01200; Metabolism; Global and overview maps; Carbon metabolism | ko01230; Metabolism; Global and overview maps; Biosynthesis of amino acids | ko00010; Metabolism; Carbohydrate metabolism; Glycolysis / Gluconeogenesis | ko00030; Metabolism; Carbohydrate metabolism; Pentose phosphate pathway | ko00051; Metabolism; Carboh…	{At4g26530; KOG1557 Fructose-biphosphate aldolase G Carbohydrate transport and metabolism ;}	{GO:0004332; fructose-bisphosphate aldolase activity; molecular_function GO:0006096; glycolysis; biological_process}	{XM_010677812.2; PREDICTED: Beta vulgaris subsp. vulgaris fructose-bisphosphate aldolase 5, cytosolic (LOC104892005), mRNA}	{PF00274:Fructose-bisphosphate aldolase class-I}
transcript_HQ_SAB_transcript19033/f2p0/1680	4.0679	3.7339e-10	1.536e-09	{KNA25346.1; hypothetical protein SOVF_007400 [Spinacia oleracea]}	{sp|Q9SAJ4|PGKY3_ARATH; Phosphoglycerate kinase 3, cytosolic OS=Arabidopsis thaliana GN=PGK3 PE=1 SV=1}	{bvg:104887096; K00927 PGK, pgk phosphoglycerate kinase 2.7.2.3 ko01200; Metabolism; Global and overview maps; Carbon metabolism | ko01230; Metabolism; Global and overview maps; Biosynthesis of amino acids | ko00010; Metabolism; Carbohydrate metabolism; Glycolysis / gluconeogenesis | ko00710; Metabolism; Energy metabolism; Carbon fixation in photosynthetic organisms}	{At1g79550; KOG1367 3-phosphoglycerate kinase G Carbohydrate transport and metabolism ;}	{GO:0003677; DNA binding; molecular_function GO:0004618; phosphoglycerate kinase activity; molecular_function GO:0006096; glycolysis; biological_process GO:0005524; ATP binding; molecular_function GO:0000160; two-component signal transduction system (phosphorelay); biological_process GO:0000156; two-component response regulator activity; molecular_function}	{XM_010671683.2; PREDICTED: Beta vulgaris subsp. vulgaris phosphoglycerate kinase 3, cytosolic (LOC104887096), mRNA}	{PF06506:Propionate catabolism activator PF00162:Phosphoglycerate kinase}
transcript_HQ_SAB_transcript18955/f3p0/1679	1.6784	1.2041e-09	4.7729e-09	{XP_019106732.1; PREDICTED: glucose-1-phosphate adenylyltransferase large subunit, chloroplastic/amyloplastic isoform X1 [Beta vulgaris subsp. vulgaris]}	{sp|P55233|GLGL1_BETVU; Glucose-1-phosphate adenylyltransferase large subunit, chloroplastic/amyloplastic OS=Beta vulgaris GN=AGPS1 PE=2 SV=1}	{pop:POPTR_0002s03480g; K00975 glgC glucose-1-phosphate adenylyltransferase 2.7.7.27 ko00500; Metabolism; Carbohydrate metabolism; Starch and sucrose metabolism | ko00520; Metabolism; Carbohydrate metabolism; Amino sugar and nucleotide sugar metabolism | ko02026; Cellular Processes; Cellular community - prokaryotes; Biofilm formation - Escherichia coli}	{At1g27680; KOG1322 GDP-mannose pyrophosphorylase/mannose-1-phosphate guanylyltransferase M Cell wall/membrane/envelope biogenesis ;}	{GO:0016772; transferase activity, transferring phosphorus-containing groups; molecular_function GO:0016779; nucleotidyltransferase activity; molecular_function GO:0009058; biosynthetic process; biological_process}	{XM_019251187.1; PREDICTED: Beta vulgaris subsp. vulgaris glucose-1-phosphate adenylyltransferase large subunit, chloroplastic/amyloplastic (LOC104889614), transcript variant X1, mRNA}	{PF00483:Nucleotidyl transferase PF07959:L-fucokinase}
transcript_HQ_SAB_transcript18167/f2p0/1730	-0.70421	1.9953e-10	8.3396e-10	{XP_010691964.1; PREDICTED: ribose-phosphate pyrophosphokinase 1 [Beta vulgaris subsp. vulgaris]}	{sp|Q9XG98|KPRS1_SPIOL; Ribose-phosphate pyrophosphokinase 1 OS=Spinacia oleracea GN=PRS1 PE=2 SV=1}	{rcu:8266684; K00948 PRPS, prsA ribose-phosphate pyrophosphokinase 2.7.6.1 ko01200; Metabolism; Global and overview maps; Carbon metabolism | ko01230; Metabolism; Global and overview maps; Biosynthesis of amino acids | ko00030; Metabolism; Carbohydrate metabolism; pentose phosphate pathway | ko00230; Metabolism; Nucleotide metabolism; Purine metabolism}	{At2g44530; KOG1448 Ribose-phosphate pyrophosphokinase FE Nucleotide transport and metabolism ; Amino acid transport and metabolism ;}	{GO:0009116; nucleoside metabolic process; biological_process GO:0004749; ribose phosphate diphosphokinase activity; molecular_function GO:0000287; magnesium ion binding; molecular_function GO:0009165; nucleotide biosynthetic process; biological_process}	{XM_010693662.2; PREDICTED: Beta vulgaris subsp. vulgaris ribose-phosphate pyrophosphokinase 1 (LOC104905206), mRNA}	{PF00156:Phosphoribosyl transferase domain PF14572:Phosphoribosyl synthetase-associated domain}
transcript_HQ_SAB_transcript18019/f2p0/1752	1.2755	5.3474e-55	8.187e-54	{XP_010666479.1; PREDICTED: pyruvate dehydrogenase E1 component subunit alpha-3, chloroplastic [Beta vulgaris subsp. vulgaris]}	{sp|O24457|ODPA3_ARATH; Pyruvate dehydrogenase E1 component subunit alpha-3, chloroplastic OS=Arabidopsis thaliana GN=PDH-E1 ALPHA PE=2 SV=1}	{nnu:104593397; K00161 PDHA, pdhA pyruvate dehydrogenase E1 component alpha subunit 1.2.4.1 ko01200; Metabolism; Global and overview maps; Carbon metabolism | ko00010; Metabolism; Carbohydrate metabolism; Glycolysis / gluconeogenesis | ko00020; Metabolism; Carbohydrate metabolism; Citrate cycle (TCA cycle) | ko00620; Metabolism; Carbohydrate metabolism; Pyruvate metabolism | ko04066; Environmenta…	{At1g01090; KOG0225 Pyruvate dehydrogenase E1, alpha subunit C Energy production and conversion ;}	{GO:0016624; oxidoreductase activity, acting on the aldehyde or oxo group of donors, disulfide as acceptor; molecular_function GO:0008152; NA GO:0003824; NA GO:0008661; 1-deoxy-D-xylulose-5-phosphate synthase activity; molecular_function GO:0030976; thiamine pyrophosphate binding; molecular_function GO:0016114; terpenoid biosynthetic process; biological_process}	{XM_010668177.2; PREDICTED: Beta vulgaris subsp. vulgaris pyruvate dehydrogenase E1 component subunit alpha-3, chloroplastic (LOC104883630), mRNA}	{PF02775:Thiamine pyrophosphate enzyme, C-terminal TPP binding domain PF00676:Dehydrogenase E1 component PF13292:1-deoxy-D-xylulose-5-phosphate synthase}
transcript_HQ_SAB_transcript17950/f3p0/1732	-0.79605	7.8742e-10	3.1664e-09	{KNA24212.1; hypothetical protein SOVF_017600 [Spinacia oleracea]}	{sp|Q6Z1G7|ODPB1_ORYSJ; Pyruvate dehydrogenase E1 component subunit beta-1, mitochondrial OS=Oryza sativa subsp. japonica GN=Os08g0536000 PE=2 SV=1}	{nnu:104592796; K00162 PDHB, pdhB pyruvate dehydrogenase E1 component beta subunit 1.2.4.1 ko01200; Metabolism; Global and overview maps; Carbon metabolism | ko00010; Metabolism; Carbohydrate metabolism; Glycolysis / gluconeogenesis | ko00020; Metabolism; Carbohydrate metabolism; Citrate cycle (TCA cycle) | ko00620; Metabolism; Carbohydrate metabolism; Pyruvate metabolism | ko04066; Environmental…	{At5g50850; KOG0524 Pyruvate dehydrogenase E1, beta subunit C Energy production and conversion ;}	{NA}	{XM_010684379.2; PREDICTED: Beta vulgaris subsp. vulgaris pyruvate dehydrogenase E1 component subunit beta-1, mitochondrial-like (LOC104897495), transcript variant X2, mRNA}	{NA}
transcript_HQ_SAB_transcript17905/f2p0/1758	0.67895	1.6843e-12	7.9666e-12	{ANW09819.1; phosphoenolpyruvate carboxykinase [Malus domestica]}	{sp|Q9SLZ0|PCKA_MAIZE; Phosphoenolpyruvate carboxykinase (ATP) OS=Zea mays PE=2 SV=1}	{pper:PRUPE_ppa003487mg; K01610 E4.1.1.49, pckA phosphoenolpyruvate carboxykinase (ATP) 4.1.1.49 ko01200; Metabolism; Global and overview maps; Carbon metabolism | ko00010; Metabolism; Carbohydrate metabolism; Glycolysis / gluconeogenesis | ko00020; Metabolism; Carbohydrate metabolism; Citrate cycle (TCA cycle) | ko00620; Metabolism; Carbohydrate metabolism; Pyruvate metabolism | ko00710; Metabol…	{NA}	{GO:0005524; ATP binding; molecular_function GO:0004612; phosphoenolpyruvate carboxykinase (ATP) activity; molecular_function GO:0006094; gluconeogenesis; biological_process}	{XM_010684762.2; PREDICTED: Beta vulgaris subsp. vulgaris phosphoenolpyruvate carboxykinase [ATP] (LOC104897815), mRNA}	{PF01293:Phosphoenolpyruvate carboxykinase}
transcript_HQ_SAB_transcript1788/f2p0/3648	0.39035	0.0038919	0.0081721	{KNA11650.1; hypothetical protein SOVF_132840 [Spinacia oleracea]}	{sp|Q9LNJ9|FKGP_ARATH; Bifunctional fucokinase/fucose pyrophosphorylase OS=Arabidopsis thaliana GN=FKGP PE=1 SV=2}	{bvg:104907115; K05305 FUK fucokinase 2.7.1.52 ko00051; Metabolism; Carbohydrate metabolism; Fructose and mannose metabolism | ko00520; Metabolism; Carbohydrate metabolism; Amino sugar and nucleotide sugar metabolism}	{At1g01220_1; KOG4644 L-fucose kinase G Carbohydrate transport and metabolism ;}	{GO:0016772; transferase activity, transferring phosphorus-containing groups; molecular_function GO:0005524; ATP binding; molecular_function}	{XM_010696022.2; PREDICTED: Beta vulgaris subsp. vulgaris bifunctional fucokinase/fucose pyrophosphorylase (LOC104907115), transcript variant X1, mRNA}	{PF07959:L-fucokinase PF00288:GHMP kinases N terminal domain}
transcript_HQ_SAB_transcript17745/f3p0/1778	0.49999	0.0048399	0.010006	{XP_010695425.1; PREDICTED: hexokinase-2, chloroplastic [Beta vulgaris subsp. vulgaris]}	{sp|Q6Q8A5|HXK2_TOBAC; Hexokinase-2, chloroplastic OS=Nicotiana tabacum GN=HXK2 PE=2 SV=1}	{fve:101308249; K00844 HK hexokinase 2.7.1.1 ko01200; Metabolism; Global and overview maps; Carbon metabolism | ko00010; Metabolism; Carbohydrate metabolism; Glycolysis / gluconeogenesis | ko00051; Metabolism; Carbohydrate metabolism; Fructose and mannose metabolism | ko00052; Metabolism; Carbohydrate metabolism; galactose metabolism | ko00500; Metabolism; Carbohydrate metabolism; Starch and sucr…	{At1g47840; KOG1369 Hexokinase G Carbohydrate transport and metabolism ;}	{GO:0016773; phosphotransferase activity, alcohol group as acceptor; molecular_function GO:0005524; ATP binding; molecular_function GO:0005975; carbohydrate metabolic process; biological_process}	{XM_010697123.2; PREDICTED: Beta vulgaris subsp. vulgaris hexokinase-2, chloroplastic (LOC104908065), mRNA}	{PF03727:Hexokinase PF00349:Hexokinase}
transcript_HQ_SAB_transcript17726/f2p0/1760	1.5814	2.3984e-53	3.556e-52	{KNA11264.1; hypothetical protein SOVF_136810 [Spinacia oleracea]}	{sp|Q9C5M8|PLY18_ARATH; Probable pectate lyase 18 OS=Arabidopsis thaliana GN=At4g24780 PE=2 SV=2}	{cmo:103483993; K01728 pel pectate lyase 4.2.2.2 ko00040; Metabolism; Carbohydrate metabolism; Pentose and glucuronate interconversions | ko02024; Cellular Processes; Cellular community - prokaryotes; Quorum sensing}	{NA}	{NA}	{XM_010697675.2; PREDICTED: Beta vulgaris subsp. vulgaris probable pectate lyase 18 (LOC104908556), mRNA}	{NA}
transcript_HQ_SAB_transcript17611/f2p0/1770	1.388	5.1254e-09	1.9508e-08	{Q9XG99.1; RecName: Full=Ribose-phosphate pyrophosphokinase 2, chloroplastic; AltName: Full=Phosphoribosyl pyrophosphate synthase 2; Flags: Precursor}	{sp|Q9XG99|KPRS2_SPIOL; Ribose-phosphate pyrophosphokinase 2, chloroplastic OS=Spinacia oleracea GN=PRS2 PE=2 SV=1}	{bvg:104892965; K00948 PRPS, prsA ribose-phosphate pyrophosphokinase 2.7.6.1 ko01200; Metabolism; Global and overview maps; Carbon metabolism | ko01230; Metabolism; Global and overview maps; Biosynthesis of amino acids | ko00030; Metabolism; Carbohydrate metabolism; pentose phosphate pathway | ko00230; Metabolism; Nucleotide metabolism; Purine metabolism}	{At1g32380; KOG1448 Ribose-phosphate pyrophosphokinase FE Nucleotide transport and metabolism ; Amino acid transport and metabolism ;}	{GO:0009165; nucleotide biosynthetic process; biological_process GO:0000287; magnesium ion binding; molecular_function GO:0009116; nucleoside metabolic process; biological_process GO:0004749; ribose phosphate diphosphokinase activity; molecular_function}	{XM_010678991.2; PREDICTED: Beta vulgaris subsp. vulgaris ribose-phosphate pyrophosphokinase 2, chloroplastic (LOC104892965), mRNA}	{PF14572:Phosphoribosyl synthetase-associated domain PF00156:Phosphoribosyl transferase domain}
transcript_HQ_SAB_transcript17581/f2p0/1766	0.79757	0.00018417	0.00046338	{XP_010691935.1; PREDICTED: GDP-mannose 4,6 dehydratase 1 [Beta vulgaris subsp. vulgaris]}	{sp|P93031|GMD2_ARATH; GDP-mannose 4,6 dehydratase 2 OS=Arabidopsis thaliana GN=MUR1 PE=1 SV=3}	{pper:PRUPE_ppa007357mg; K01711 gmd, GMDS GDPmannose 4,6-dehydratase 4.2.1.47 ko00051; Metabolism; Carbohydrate metabolism; Fructose and mannose metabolism | ko00520; Metabolism; Carbohydrate metabolism; Amino sugar and nucleotide sugar metabolism}	{At5g66280; KOG1372 GDP-mannose 4,6 dehydratase G Carbohydrate transport and metabolism ;}	{GO:0050662; coenzyme binding; molecular_function GO:0003824; NA GO:0019050; suppression by virus of host apoptosis; biological_process}	{XM_010693633.2; PREDICTED: Beta vulgaris subsp. vulgaris GDP-mannose 4,6 dehydratase 1 (LOC104905183), mRNA}	{PF03229:Alphavirus glycoprotein J PF01370:NAD dependent epimerase/dehydratase family}
transcript_HQ_SAB_transcript17574/f2p0/1777	-0.4013	0.022388	0.040912	{XP_010679767.1; PREDICTED: mannan endo-1,4-beta-mannosidase 7 [Beta vulgaris subsp. vulgaris]}	{sp|Q9FJZ3|MAN7_ARATH; Mannan endo-1,4-beta-mannosidase 7 OS=Arabidopsis thaliana GN=MAN7 PE=2 SV=1}	{pper:PRUPE_ppa005992mg; K19355 MAN mannan endo-1,4-beta-mannosidase 3.2.1.78 ko00051; Metabolism; Carbohydrate metabolism; Fructose and mannose metabolism}	{NA}	{GO:0005975; carbohydrate metabolic process; biological_process GO:0009341; beta-galactosidase complex; cellular_component GO:0004553; hydrolase activity, hydrolyzing O-glycosyl compounds; molecular_function GO:0004565; beta-galactosidase activity; molecular_function}	{XM_010681465.2; PREDICTED: Beta vulgaris subsp. vulgaris mannan endo-1,4-beta-mannosidase 7 (LOC104895061), mRNA}	{PF02836:Glycosyl hydrolases family 2, TIM barrel domain PF02449:Beta-galactosidase PF00150:Cellulase (glycosyl hydrolase family 5)}
transcript_HQ_SAB_transcript17432/f3p0/1776	0.82517	3.9665e-07	1.3156e-06	{XP_010673492.1; PREDICTED: glucan endo-1,3-beta-glucosidase 4 [Beta vulgaris subsp. vulgaris]}	{sp|Q94CD8|E134_ARATH; Glucan endo-1,3-beta-glucosidase 4 OS=Arabidopsis thaliana GN=At3g13560 PE=1 SV=1}	{bvg:104889860; K19892 GN4 glucan endo-1,3-beta-glucosidase 4 3.2.1.39 ko00500; Metabolism; Carbohydrate metabolism; Starch and sucrose metabolism}	{NA}	{GO:0005975; carbohydrate metabolic process; biological_process GO:0004553; hydrolase activity, hydrolyzing O-glycosyl compounds; molecular_function}	{XM_019248820.1; PREDICTED: Beta vulgaris subsp. vulgaris glucan endo-1,3-beta-glucosidase 4 (LOC104889860), transcript variant X2, mRNA}	{PF00332:Glycosyl hydrolases family 17}
transcript_HQ_SAB_transcript17372/f2p0/1780	-2.3689	1.8172e-113	5.8977e-112	{KNA03415.1; hypothetical protein SOVF_209440 [Spinacia oleracea]}	{sp|P31023|DLDH_PEA; Dihydrolipoyl dehydrogenase, mitochondrial OS=Pisum sativum GN=LPD PE=1 SV=2}	{bvg:104889141; K00382 DLD, lpd, pdhD dihydrolipoamide dehydrogenase 1.8.1.4 ko01200; Metabolism; Global and overview maps; Carbon metabolism | ko00010; Metabolism; Carbohydrate metabolism; Glycolysis / gluconeogenesis | ko00020; Metabolism; Carbohydrate metabolism; Citrate cycle (TCA cycle) | ko00620; Metabolism; Carbohydrate metabolism; Pyruvate metabolism | ko00630; Metabolism; Carbohydrate me…	{At1g48030; KOG1335 Dihydrolipoamide dehydrogenase C Energy production and conversion ;}	{GO:0071949; FAD binding; molecular_function GO:0006631; fatty acid metabolic process; biological_process GO:0016616; oxidoreductase activity, acting on the CH-OH group of donors, NAD or NADP as acceptor; molecular_function GO:0003857; 3-hydroxyacyl-CoA dehydrogenase activity; molecular_function GO:0051287; NAD binding; molecular_function GO:0050660; flavin adenine dinucleotide binding; molecular…	{XM_010674294.2; PREDICTED: Beta vulgaris subsp. vulgaris dihydrolipoyl dehydrogenase, mitochondrial (LOC104889141), mRNA}	{PF01266:FAD dependent oxidoreductase PF01134:Glucose inhibited division protein A PF01593:Flavin containing amine oxidoreductase PF02737:3-hydroxyacyl-CoA dehydrogenase, NAD binding domain PF02852:Pyridine nucleotide-disulphide oxidoreductase, dimerisation domain PF07992:Pyridine nucleotide-disulphide oxidoreductase PF03721:UDP-glucose/GDP-mannose dehydrogenase family, NAD binding domain PF00070…
transcript_HQ_SAB_transcript17285/f4p0/1755	-0.47528	0.0023004	0.0050024	{XP_010684945.1; PREDICTED: probable pectate lyase 4 [Beta vulgaris subsp. vulgaris]}	{sp|Q9C8G4|PLY4_ARATH; Probable pectate lyase 4 OS=Arabidopsis thaliana GN=At1g30350 PE=2 SV=1}	{jcu:105636240; K01728 pel pectate lyase 4.2.2.2 ko00040; Metabolism; Carbohydrate metabolism; Pentose and glucuronate interconversions | ko02024; Cellular Processes; Cellular community - prokaryotes; Quorum sensing}	{NA}	{NA}	{XM_010686643.2; PREDICTED: Beta vulgaris subsp. vulgaris probable pectate lyase 4 (LOC104899447), mRNA}	{NA}
transcript_HQ_SAB_transcript17070/f2p0/1803	2.781	2.8913e-10	1.1964e-09	{XP_010673860.1; PREDICTED: beta-glucosidase 42 isoform X1 [Beta vulgaris subsp. vulgaris]}	{sp|Q9FIW4|BGL42_ARATH; Beta-glucosidase 42 OS=Arabidopsis thaliana GN=BGLU42 PE=2 SV=1}	{bvg:104890172; K01188 E3.2.1.21 beta-glucosidase 3.2.1.21 ko00500; Metabolism; Carbohydrate metabolism; Starch and sucrose metabolism | ko00460; Metabolism; Metabolism of other amino acids; Cyanoamino acid metabolism | ko00940; Metabolism; Biosynthesis of other secondary metabolites; Phenylpropanoid biosynthesis}	{At5g36890; KOG0626 Beta-glucosidase, lactase phlorizinhydrolase, and related proteins G Carbohydrate transport and metabolism ;}	{GO:0004553; hydrolase activity, hydrolyzing O-glycosyl compounds; molecular_function GO:0005975; carbohydrate metabolic process; biological_process}	{XM_010675558.2; PREDICTED: Beta vulgaris subsp. vulgaris beta-glucosidase 42 (LOC104890172), transcript variant X1, mRNA}	{PF00150:Cellulase (glycosyl hydrolase family 5) PF00232:Glycosyl hydrolase family 1}
transcript_HQ_SAB_transcript1693/f4p0/3652	1.4709	2.6318e-14	1.3618e-13	{XP_010669493.1; PREDICTED: L-arabinokinase [Beta vulgaris subsp. vulgaris]}	{sp|O23461|ARAK_ARATH; L-arabinokinase OS=Arabidopsis thaliana GN=ARA1 PE=1 SV=1}	{bvg:104886709; K12446 E2.7.1.46 L-arabinokinase 2.7.1.46 ko00520; Metabolism; Carbohydrate metabolism; Amino sugar and nucleotide sugar metabolism}	{At4g16130; KOG0631 Galactokinase G Carbohydrate transport and metabolism ;}	{GO:0005524; ATP binding; molecular_function}	{XM_010671191.2; PREDICTED: Beta vulgaris subsp. vulgaris L-arabinokinase (LOC104886709), mRNA}	{PF00288:GHMP kinases N terminal domain}
transcript_HQ_SAB_transcript16600/f3p0/1822	-0.36763	0.0074773	0.015004	{KNA22687.1; hypothetical protein SOVF_032040 [Spinacia oleracea]}	{sp|Q94CD8|E134_ARATH; Glucan endo-1,3-beta-glucosidase 4 OS=Arabidopsis thaliana GN=At3g13560 PE=1 SV=1}	{bvg:104889860; K19892 GN4 glucan endo-1,3-beta-glucosidase 4 3.2.1.39 ko00500; Metabolism; Carbohydrate metabolism; Starch and sucrose metabolism}	{NA}	{NA}	{XM_018637721.1; PREDICTED: Raphanus sativus glucan endo-1,3-beta-glucosidase 4 (LOC108863329), mRNA}	{NA}
transcript_HQ_SAB_transcript16530/f2p0/1836	0.60916	9.3035e-10	3.7165e-09	{KNA09204.1; hypothetical protein SOVF_155780 [Spinacia oleracea]}	{sp|Q940S3|UAP1_ARATH; UDP-N-acetylglucosamine diphosphorylase 1 OS=Arabidopsis thaliana GN=GLCNAC1PUT1 PE=1 SV=1}	{vvi:100256047; K00972 UAP1 UDP-N-acetylglucosamine/UDP-N-acetylgalactosamine diphosphorylase [EC:2.7.7.23 2.7.7.83] 2.7.7.23,2.7.7.83 ko00520; Metabolism; Carbohydrate metabolism; Amino sugar and nucleotide sugar metabolism}	{At1g31070; KOG2388 UDP-N-acetylglucosamine pyrophosphorylase M Cell wall/membrane/envelope biogenesis ;}	{GO:0008152; NA GO:0070569; uridylyltransferase activity; molecular_function}	{XM_010685413.2; PREDICTED: Beta vulgaris subsp. vulgaris UDP-N-acetylglucosamine diphosphorylase 1 (LOC104898351), mRNA}	{PF01704:UTP--glucose-1-phosphate uridylyltransferase}
transcript_HQ_SAB_transcript16517/f2p0/1848	1.3568	1.5538e-14	8.1322e-14	{XP_010678413.1; PREDICTED: UDP-glucose 6-dehydrogenase 1 [Beta vulgaris subsp. vulgaris]}	{sp|Q9LF33|UGDH3_ARATH; UDP-glucose 6-dehydrogenase 3 OS=Arabidopsis thaliana GN=UGD3 PE=1 SV=1}	{bvg:104893967; K00012 UGDH, ugd UDPglucose 6-dehydrogenase 1.1.1.22 ko00040; Metabolism; Carbohydrate metabolism; Pentose and glucuronate interconversions | ko00053; Metabolism; Carbohydrate metabolism; Ascorbate and aldarate metabolism | ko00520; Metabolism; Carbohydrate metabolism; Amino sugar and nucleotide sugar metabolism}	{At5g15490; KOG2666 UDP-glucose/GDP-mannose dehydrogenase GT Carbohydrate transport and metabolism ; Signal transduction mechanisms ;}	{GO:0051287; NAD binding; molecular_function GO:0055114; oxidation-reduction process; biological_process GO:0016491; oxidoreductase activity; molecular_function GO:0016616; oxidoreductase activity, acting on the CH-OH group of donors, NAD or NADP as acceptor; molecular_function GO:0004616; phosphogluconate dehydrogenase (decarboxylating) activity; molecular_function}	{XM_019249653.1; PREDICTED: Beta vulgaris subsp. vulgaris UDP-glucose 6-dehydrogenase 1 (LOC104893967), transcript variant X2, mRNA}	{PF03446:NAD binding domain of 6-phosphogluconate dehydrogenase PF03721:UDP-glucose/GDP-mannose dehydrogenase family, NAD binding domain PF00056:lactate/malate dehydrogenase, NAD binding domain PF00984:UDP-glucose/GDP-mannose dehydrogenase family, central domain PF03720:UDP-glucose/GDP-mannose dehydrogenase family, UDP binding domain}
transcript_HQ_SAB_transcript16500/f3p0/1829	0.71937	3.6454e-16	2.0495e-15	{KNA25764.1; hypothetical protein SOVF_003910 [Spinacia oleracea]}	{sp|Q9LIS3|GAE6_ARATH; UDP-glucuronate 4-epimerase 6 OS=Arabidopsis thaliana GN=GAE6 PE=1 SV=1}	{bvg:104889782; K08679 E5.1.3.6 UDP-glucuronate 4-epimerase 5.1.3.6 ko00520; Metabolism; Carbohydrate metabolism; Amino sugar and nucleotide sugar metabolism}	{At3g23820; KOG1371 UDP-glucose 4-epimerase/UDP-sulfoquinovose synthase M Cell wall/membrane/envelope biogenesis ;}	{GO:0055114; oxidation-reduction process; biological_process GO:0006694; steroid biosynthetic process; biological_process GO:0008168; methyltransferase activity; molecular_function GO:0050662; coenzyme binding; molecular_function GO:0016616; oxidoreductase activity, acting on the CH-OH group of donors, NAD or NADP as acceptor; molecular_function GO:0003824; NA GO:0008152; NA GO:0003854; 3-beta-hy…	{XM_010675087.2; PREDICTED: Beta vulgaris subsp. vulgaris UDP-glucuronate 4-epimerase 6 (LOC104889782), mRNA}	{PF01073:3-beta hydroxysteroid dehydrogenase/isomerase family PF08241:Methyltransferase domain PF01370:NAD dependent epimerase/dehydratase family}
transcript_HQ_SAB_transcript16417/f2p0/1856	2.2951	1.9712e-21	1.3633e-20	{KNA25154.1; hypothetical protein SOVF_008800 [Spinacia oleracea]}	{sp|B8AVF0|BGL12_ORYSI; Beta-glucosidase 12 OS=Oryza sativa subsp. indica GN=BGLU12 PE=3 SV=1}	{bvg:104889924; K01188 E3.2.1.21 beta-glucosidase 3.2.1.21 ko00500; Metabolism; Carbohydrate metabolism; Starch and sucrose metabolism | ko00460; Metabolism; Metabolism of other amino acids; Cyanoamino acid metabolism | ko00940; Metabolism; Biosynthesis of other secondary metabolites; Phenylpropanoid biosynthesis}	{At2g44480; KOG0626 Beta-glucosidase, lactase phlorizinhydrolase, and related proteins G Carbohydrate transport and metabolism ;}	{GO:0004553; hydrolase activity, hydrolyzing O-glycosyl compounds; molecular_function GO:0005975; carbohydrate metabolic process; biological_process}	{XM_012237400.1; PREDICTED: Jatropha curcas beta-glucosidase 12-like (LOC105650486), mRNA}	{PF00232:Glycosyl hydrolase family 1}
transcript_HQ_SAB_transcript16392/f2p0/1825	-0.46769	2.5792e-05	7.1995e-05	{XP_010677590.1; PREDICTED: probable sucrose-phosphatase 2 [Beta vulgaris subsp. vulgaris]}	{sp|Q9SJ66|SPP2_ARATH; Probable sucrose-phosphatase 2 OS=Arabidopsis thaliana GN=SPP2 PE=2 SV=2}	{bvg:104893197; K07024 SPP sucrose-6-phosphatase&#160; 3.1.3.24 ko00500; Metabolism; Carbohydrate metabolism; Starch and sucrose metabolism}	{NA}	{GO:0003824; NA GO:0005992; trehalose biosynthetic process; biological_process GO:0005737; cytoplasm; cellular_component GO:0009298; GDP-mannose biosynthetic process; biological_process GO:0004615; phosphomannomutase activity; molecular_function GO:0005986; sucrose biosynthetic process; biological_process GO:0050307; sucrose-phosphate phosphatase activity; molecular_function}	{XM_010679288.1; PREDICTED: Beta vulgaris subsp. vulgaris probable sucrose-phosphatase 2 (LOC104893197), transcript variant X1, mRNA}	{PF02358:Trehalose-phosphatase PF03332:Eukaryotic phosphomannomutase PF08472:Sucrose-6-phosphate phosphohydrolase C-terminal}
transcript_HQ_SAB_transcript16193/f2p0/1850	0.44094	0.00083291	0.0019311	{KNA25154.1; hypothetical protein SOVF_008800 [Spinacia oleracea]}	{sp|Q7XKV4|BGL12_ORYSJ; Beta-glucosidase 12 OS=Oryza sativa subsp. japonica GN=BGLU12 PE=1 SV=2}	{bvg:104889924; K01188 E3.2.1.21 beta-glucosidase 3.2.1.21 ko00500; Metabolism; Carbohydrate metabolism; Starch and sucrose metabolism | ko00460; Metabolism; Metabolism of other amino acids; Cyanoamino acid metabolism | ko00940; Metabolism; Biosynthesis of other secondary metabolites; Phenylpropanoid biosynthesis}	{At2g44450; KOG0626 Beta-glucosidase, lactase phlorizinhydrolase, and related proteins G Carbohydrate transport and metabolism ;}	{GO:0004553; hydrolase activity, hydrolyzing O-glycosyl compounds; molecular_function GO:0005975; carbohydrate metabolic process; biological_process}	{XM_002285546.3; PREDICTED: Vitis vinifera beta-glucosidase 12-like (LOC100260409), mRNA}	{PF00232:Glycosyl hydrolase family 1}
transcript_HQ_SAB_transcript16017/f2p0/1871	0.53068	0.0034611	0.0073295	{KNA23516.1; hypothetical protein SOVF_024180 [Spinacia oleracea]}	{sp|Q9SA77|ARAE1_ARATH; UDP-arabinose 4-epimerase 1 OS=Arabidopsis thaliana GN=MUR4 PE=1 SV=1}	{bvg:104893372; K12448 UXE, uxe UDP-arabinose 4-epimerase 5.1.3.5 ko00520; Metabolism; Carbohydrate metabolism; Amino sugar and nucleotide sugar metabolism}	{At1g30620; KOG1371 UDP-glucose 4-epimerase/UDP-sulfoquinovose synthase M Cell wall/membrane/envelope biogenesis ;}	{GO:0050662; coenzyme binding; molecular_function GO:0003854; 3-beta-hydroxy-delta5-steroid dehydrogenase activity; molecular_function GO:0008152; NA GO:0003824; NA GO:0016616; oxidoreductase activity, acting on the CH-OH group of donors, NAD or NADP as acceptor; molecular_function GO:0006694; steroid biosynthetic process; biological_process GO:0051287; NAD binding; molecular_function GO:0055114;…	{XM_010679467.2; PREDICTED: Beta vulgaris subsp. vulgaris UDP-arabinose 4-epimerase 1 (LOC104893372), transcript variant X1, mRNA}	{PF03721:UDP-glucose/GDP-mannose dehydrogenase family, NAD binding domain PF01370:NAD dependent epimerase/dehydratase family PF01073:3-beta hydroxysteroid dehydrogenase/isomerase family PF08241:Methyltransferase domain}
transcript_HQ_SAB_transcript15994/f3p0/1837	2.9548	0.00050032	0.0011928	{KNA23727.1; hypothetical protein SOVF_021530 [Spinacia oleracea]}	{sp|A8KYS5|TAL_FRASN; Transaldolase OS=Frankia sp. (strain EAN1pec) GN=tal PE=3 SV=1}	{mdm:103452497; K00616 E2.2.1.2, talA, talB transaldolase 2.2.1.2 ko01200; Metabolism; Global and overview maps; Carbon metabolism | ko01230; Metabolism; Global and overview maps; Biosynthesis of amino acids | ko00030; Metabolism; Carbohydrate metabolism; pentose phosphate pathway}	{At5g13420; KOG2772 Transaldolase G Carbohydrate transport and metabolism ;}	{GO:0005975; carbohydrate metabolic process; biological_process}	{XM_010684330.2; PREDICTED: Beta vulgaris subsp. vulgaris hypothetical protein (LOC104897452), mRNA}	{PF00923:Transaldolase}
transcript_HQ_SAB_transcript15639/f2p0/1886	1.1946	1.2076e-49	1.6931e-48	{KNA07801.1; hypothetical protein SOVF_168640 [Spinacia oleracea]}	{sp|Q9M0B6|GAE1_ARATH; UDP-glucuronate 4-epimerase 1 OS=Arabidopsis thaliana GN=GAE1 PE=1 SV=1}	{pmum:103323359; K08679 E5.1.3.6 UDP-glucuronate 4-epimerase 5.1.3.6 ko00520; Metabolism; Carbohydrate metabolism; Amino sugar and nucleotide sugar metabolism}	{At4g30440; KOG1371 UDP-glucose 4-epimerase/UDP-sulfoquinovose synthase M Cell wall/membrane/envelope biogenesis ;}	{GO:0050662; coenzyme binding; molecular_function GO:0003854; 3-beta-hydroxy-delta5-steroid dehydrogenase activity; molecular_function GO:0008152; NA GO:0003824; NA GO:0016616; oxidoreductase activity, acting on the CH-OH group of donors, NAD or NADP as acceptor; molecular_function GO:0016491; oxidoreductase activity; molecular_function GO:0006694; steroid biosynthetic process; biological_process…	{XM_010689378.2; PREDICTED: Beta vulgaris subsp. vulgaris UDP-glucuronate 4-epimerase 1 (LOC104901768), mRNA}	{PF01370:NAD dependent epimerase/dehydratase family PF01073:3-beta hydroxysteroid dehydrogenase/isomerase family PF08241:Methyltransferase domain PF00056:lactate/malate dehydrogenase, NAD binding domain}
transcript_HQ_SAB_transcript15335/f2p0/1892	1.0854	0.011131	0.0216	{KNA23727.1; hypothetical protein SOVF_021530 [Spinacia oleracea]}	{sp|A8KYS5|TAL_FRASN; Transaldolase OS=Frankia sp. (strain EAN1pec) GN=tal PE=3 SV=1}	{pop:POPTR_0001s12930g; K00616 E2.2.1.2, talA, talB transaldolase 2.2.1.2 ko01200; Metabolism; Global and overview maps; Carbon metabolism | ko01230; Metabolism; Global and overview maps; Biosynthesis of amino acids | ko00030; Metabolism; Carbohydrate metabolism; pentose phosphate pathway}	{At5g13420; KOG2772 Transaldolase G Carbohydrate transport and metabolism ;}	{GO:0005975; carbohydrate metabolic process; biological_process}	{XM_010684330.2; PREDICTED: Beta vulgaris subsp. vulgaris hypothetical protein (LOC104897452), mRNA}	{PF00923:Transaldolase}
transcript_HQ_SAB_transcript15308/f2p0/1908	-1.7085	9.7145e-54	1.4536e-52	{XP_010684945.1; PREDICTED: probable pectate lyase 4 [Beta vulgaris subsp. vulgaris]}	{sp|Q9C8G4|PLY4_ARATH; Probable pectate lyase 4 OS=Arabidopsis thaliana GN=At1g30350 PE=2 SV=1}	{sind:105161432; K01728 pel pectate lyase 4.2.2.2 ko00040; Metabolism; Carbohydrate metabolism; Pentose and glucuronate interconversions | ko02024; Cellular Processes; Cellular community - prokaryotes; Quorum sensing}	{NA}	{NA}	{XM_010686643.2; PREDICTED: Beta vulgaris subsp. vulgaris probable pectate lyase 4 (LOC104899447), mRNA}	{NA}
transcript_HQ_SAB_transcript15179/f2p0/1959	0.277	5.2475e-05	0.00014122	{XP_010685225.1; PREDICTED: UDP-glucose 6-dehydrogenase 5 [Beta vulgaris subsp. vulgaris]}	{sp|Q2QS13|UGDH5_ORYSJ; UDP-glucose 6-dehydrogenase 5 OS=Oryza sativa subsp. japonica GN=UGD5 PE=2 SV=1}	{vvi:100261061; K00012 UGDH, ugd UDPglucose 6-dehydrogenase 1.1.1.22 ko00040; Metabolism; Carbohydrate metabolism; Pentose and glucuronate interconversions | ko00053; Metabolism; Carbohydrate metabolism; Ascorbate and aldarate metabolism | ko00520; Metabolism; Carbohydrate metabolism; Amino sugar and nucleotide sugar metabolism}	{At5g15490; KOG2666 UDP-glucose/GDP-mannose dehydrogenase GT Carbohydrate transport and metabolism ; Signal transduction mechanisms ;}	{GO:0051287; NAD binding; molecular_function GO:0055114; oxidation-reduction process; biological_process GO:0004616; phosphogluconate dehydrogenase (decarboxylating) activity; molecular_function GO:0016616; oxidoreductase activity, acting on the CH-OH group of donors, NAD or NADP as acceptor; molecular_function}	{XM_010686923.2; PREDICTED: Beta vulgaris subsp. vulgaris UDP-glucose 6-dehydrogenase 5 (LOC104899685), mRNA}	{PF03721:UDP-glucose/GDP-mannose dehydrogenase family, NAD binding domain PF00984:UDP-glucose/GDP-mannose dehydrogenase family, central domain PF03720:UDP-glucose/GDP-mannose dehydrogenase family, UDP binding domain PF03446:NAD binding domain of 6-phosphogluconate dehydrogenase}
transcript_HQ_SAB_transcript15118/f9p0/1837	-0.59072	8.1958e-06	2.404e-05	{XP_010693410.1; PREDICTED: glyceraldehyde-3-phosphate dehydrogenase GAPCP2, chloroplastic [Beta vulgaris subsp. vulgaris]}	{sp|Q5E924|G3PP2_ARATH; Glyceraldehyde-3-phosphate dehydrogenase GAPCP2, chloroplastic OS=Arabidopsis thaliana GN=GAPCP2 PE=2 SV=1}	{mdm:103445881; K00134 GAPDH, gapA glyceraldehyde 3-phosphate dehydrogenase 1.2.1.12 ko01200; Metabolism; Global and overview maps; Carbon metabolism | ko01230; Metabolism; Global and overview maps; Biosynthesis of amino acids | ko00010; Metabolism; Carbohydrate metabolism; Glycolysis / gluconeogenesis | ko00710; Metabolism; Energy metabolism; Carbon fixation in photosynthetic organisms | ko04066…	{At1g16300; KOG0657 Glyceraldehyde 3-phosphate dehydrogenase G Carbohydrate transport and metabolism ;}	{GO:0009089; lysine biosynthetic process via diaminopimelate; biological_process GO:0008839; dihydrodipicolinate reductase activity; molecular_function GO:0051287; NAD binding; molecular_function GO:0016620; oxidoreductase activity, acting on the aldehyde or oxo group of donors, NAD or NADP as acceptor; molecular_function GO:0055114; oxidation-reduction process; biological_process}	{XM_010695108.2; PREDICTED: Beta vulgaris subsp. vulgaris glyceraldehyde-3-phosphate dehydrogenase GAPCP2, chloroplastic (LOC104906366), mRNA}	{PF02800:Glyceraldehyde 3-phosphate dehydrogenase, C-terminal domain PF02826:D-isomer specific 2-hydroxyacid dehydrogenase, NAD binding domain PF00044:Glyceraldehyde 3-phosphate dehydrogenase, NAD binding domain PF01113:Dihydrodipicolinate reductase, N-terminus}
transcript_HQ_SAB_transcript14823/f3p0/1932	0.97641	4.2835e-12	1.973e-11	{XP_010677906.1; PREDICTED: beta-glucosidase 13 [Beta vulgaris subsp. vulgaris]}	{sp|Q7XKV4|BGL12_ORYSJ; Beta-glucosidase 12 OS=Oryza sativa subsp. japonica GN=BGLU12 PE=1 SV=2}	{bvg:104893501; K01188 E3.2.1.21 beta-glucosidase 3.2.1.21 ko00500; Metabolism; Carbohydrate metabolism; Starch and sucrose metabolism | ko00460; Metabolism; Metabolism of other amino acids; Cyanoamino acid metabolism | ko00940; Metabolism; Biosynthesis of other secondary metabolites; Phenylpropanoid biosynthesis}	{At3g60130; KOG0626 Beta-glucosidase, lactase phlorizinhydrolase, and related proteins G Carbohydrate transport and metabolism ;}	{GO:0004553; hydrolase activity, hydrolyzing O-glycosyl compounds; molecular_function GO:0005975; carbohydrate metabolic process; biological_process}	{XM_010679604.2; PREDICTED: Beta vulgaris subsp. vulgaris beta-glucosidase 13 (LOC104893501), mRNA}	{PF00232:Glycosyl hydrolase family 1 PF00150:Cellulase (glycosyl hydrolase family 5)}
transcript_HQ_SAB_transcript14697/f8p0/1867	-0.3566	3.468e-05	9.5457e-05	{XP_010674357.1; PREDICTED: aldehyde dehydrogenase family 3 member H1 isoform X2 [Beta vulgaris subsp. vulgaris]}	{sp|Q8W033|AL3I1_ARATH; Aldehyde dehydrogenase family 3 member I1, chloroplastic OS=Arabidopsis thaliana GN=ALDH3I1 PE=1 SV=2}	{bvg:104890532; K00128 ALDH aldehyde dehydrogenase (NAD+) 1.2.1.3 ko00010; Metabolism; Carbohydrate metabolism; Glycolysis / gluconeogenesis | ko00053; Metabolism; Carbohydrate metabolism; Ascorbate and aldarate metabolism | ko00620; Metabolism; Carbohydrate metabolism; Pyruvate metabolism | ko00071; Metabolism; Lipid metabolism; Fatty acid degradation | ko00561; Metabolism; Lipid metabolism; Gly…	{At1g44170; KOG2456 Aldehyde dehydrogenase C Energy production and conversion ;}	{GO:0016491; oxidoreductase activity; molecular_function GO:0055114; oxidation-reduction process; biological_process GO:0008152; NA}	{XM_010676055.2; PREDICTED: Beta vulgaris subsp. vulgaris aldehyde dehydrogenase family 3 member H1 (LOC104890532), transcript variant X2, mRNA}	{PF00171:Aldehyde dehydrogenase family}
transcript_HQ_SAB_transcript14686/f2p0/1947	-1.9888	5.1611e-292	5.3192e-290	{XP_010688887.1; PREDICTED: UDP-glucose 6-dehydrogenase 1 [Beta vulgaris subsp. vulgaris]}	{sp|Q96558|UGDH1_SOYBN; UDP-glucose 6-dehydrogenase 1 OS=Glycine max GN=UGD1 PE=2 SV=1}	{thj:104805508; K00012 UGDH, ugd UDPglucose 6-dehydrogenase 1.1.1.22 ko00040; Metabolism; Carbohydrate metabolism; Pentose and glucuronate interconversions | ko00053; Metabolism; Carbohydrate metabolism; Ascorbate and aldarate metabolism | ko00520; Metabolism; Carbohydrate metabolism; Amino sugar and nucleotide sugar metabolism}	{At5g15490; KOG2666 UDP-glucose/GDP-mannose dehydrogenase GT Carbohydrate transport and metabolism ; Signal transduction mechanisms ;}	{GO:0051287; NAD binding; molecular_function GO:0055114; oxidation-reduction process; biological_process GO:0016616; oxidoreductase activity, acting on the CH-OH group of donors, NAD or NADP as acceptor; molecular_function GO:0004616; phosphogluconate dehydrogenase (decarboxylating) activity; molecular_function}	{XM_010690585.2; PREDICTED: Beta vulgaris subsp. vulgaris UDP-glucose 6-dehydrogenase 1 (LOC104902705), transcript variant X1, mRNA}	{PF03446:NAD binding domain of 6-phosphogluconate dehydrogenase PF03721:UDP-glucose/GDP-mannose dehydrogenase family, NAD binding domain PF00984:UDP-glucose/GDP-mannose dehydrogenase family, central domain PF03720:UDP-glucose/GDP-mannose dehydrogenase family, UDP binding domain}
transcript_HQ_SAB_transcript14490/f4p0/1958	Inf	0.026757	0.048124	{Q43772.1; RecName: Full=UTP--glucose-1-phosphate uridylyltransferase; AltName: Full=UDP-glucose pyrophosphorylase; Short=UDPGP; Short=UGPase}	{sp|Q07130|UGPA_BOVIN; UTP--glucose-1-phosphate uridylyltransferase OS=Bos taurus GN=UGP2 PE=1 SV=2}	{gsl:Gasu_00860; K00963 UGP2, galU, galF UTP--glucose-1-phosphate uridylyltransferase 2.7.7.9 ko00040; Metabolism; Carbohydrate metabolism; Pentose and glucuronate interconversions | ko00052; Metabolism; Carbohydrate metabolism; galactose metabolism | ko00500; Metabolism; Carbohydrate metabolism; Starch and sucrose metabolism | ko00520; Metabolism; Carbohydrate metabolism; Amino sugar and nucleot…	{7294971; KOG2638 UDP-glucose pyrophosphorylase G Carbohydrate transport and metabolism ;}	{GO:0008152; NA GO:0070569; uridylyltransferase activity; molecular_function}	{NA}	{PF01704:UTP--glucose-1-phosphate uridylyltransferase}
transcript_HQ_SAB_transcript14404/f2p0/1959	5.6737	4.1584e-16	2.3317e-15	{XP_010695452.1; PREDICTED: Beta-amylase 3, chloroplastic [Beta vulgaris subsp. vulgaris]}	{sp|O23553|BAM3_ARATH; Beta-amylase 3, chloroplastic OS=Arabidopsis thaliana GN=BAM3 PE=1 SV=3}	{pop:POPTR_0003s03330g; K01177 E3.2.1.2 Beta-amylase 3.2.1.2 ko00500; Metabolism; Carbohydrate metabolism; Starch and sucrose metabolism}	{NA}	{GO:0000272; polysaccharide catabolic process; biological_process GO:0016161; Beta-amylase activity; molecular_function GO:0009767; photosynthetic electron transport chain; biological_process}	{XM_010697150.2; PREDICTED: Beta vulgaris subsp. vulgaris Beta-amylase 3, chloroplastic (LOC104908081), mRNA}	{PF11623:Protein of unknown function (DUF3252) PF01373:Glycosyl hydrolase family 14}
transcript_HQ_SAB_transcript14163/f5p0/1967	-1.2607	1.0022e-43	1.2493e-42	{XP_010676282.1; PREDICTED: UDP-glucose 4-epimerase GEPI48 [Beta vulgaris subsp. vulgaris]}	{sp|Q9T0A7|UGE2_ARATH; UDP-glucose 4-epimerase 2 OS=Arabidopsis thaliana GN=UGE2 PE=1 SV=1}	{bvg:104892143; K01784 galE, GALE UDP-glucose 4-epimerase 5.1.3.2 ko00052; Metabolism; Carbohydrate metabolism; Galactose metabolism | ko00520; Metabolism; Carbohydrate metabolism; Amino sugar and nucleotide sugar metabolism}	{At4g23920; KOG1371 UDP-glucose 4-epimerase/UDP-sulfoquinovose synthase M Cell wall/membrane/envelope biogenesis ;}	{GO:0003854; 3-beta-hydroxy-delta5-steroid dehydrogenase activity; molecular_function GO:0003857; 3-hydroxyacyl-CoA dehydrogenase activity; molecular_function GO:0003824; NA GO:0016616; oxidoreductase activity, acting on the CH-OH group of donors, NAD or NADP as acceptor; molecular_function GO:0006631; fatty acid metabolic process; biological_process GO:0050662; coenzyme binding; molecular_functi…	{XM_010677980.2; PREDICTED: Beta vulgaris subsp. vulgaris UDP-glucose 4-epimerase GEPI48 (LOC104892143), mRNA}	{PF02737:3-hydroxyacyl-CoA dehydrogenase, NAD binding domain PF01370:NAD dependent epimerase/dehydratase family PF01073:3-beta hydroxysteroid dehydrogenase/isomerase family}
transcript_HQ_SAB_transcript14082/f5p0/1937	-3.1341	1.5514e-63	2.727e-62	{XP_010669994.1; PREDICTED: phosphoglycerate kinase, chloroplastic [Beta vulgaris subsp. vulgaris]}	{sp|P29409|PGKH_SPIOL; Phosphoglycerate kinase, chloroplastic (Fragment) OS=Spinacia oleracea PE=2 SV=2}	{bvg:104887103; K00927 PGK, pgk phosphoglycerate kinase 2.7.2.3 ko01200; Metabolism; Global and overview maps; Carbon metabolism | ko01230; Metabolism; Global and overview maps; Biosynthesis of amino acids | ko00010; Metabolism; Carbohydrate metabolism; Glycolysis / gluconeogenesis | ko00710; Metabolism; Energy metabolism; Carbon fixation in photosynthetic organisms}	{At1g56190; KOG1367 3-phosphoglycerate kinase G Carbohydrate transport and metabolism ;}	{GO:0006096; glycolysis; biological_process GO:0004618; phosphoglycerate kinase activity; molecular_function GO:0005524; ATP binding; molecular_function GO:0003677; DNA binding; molecular_function GO:0000160; two-component signal transduction system (phosphorelay); biological_process GO:0000156; two-component response regulator activity; molecular_function}	{XM_010671692.2; PREDICTED: Beta vulgaris subsp. vulgaris phosphoglycerate kinase, chloroplastic (LOC104887103), mRNA}	{PF06506:Propionate catabolism activator PF00162:Phosphoglycerate kinase}
transcript_HQ_SAB_transcript13984/f3p0/1985	0.53564	3.0812e-06	9.4306e-06	{KNA04660.1; hypothetical protein SOVF_197610 [Spinacia oleracea]}	{sp|Q9SU63|AL2B4_ARATH; Aldehyde dehydrogenase family 2 member B4, mitochondrial OS=Arabidopsis thaliana GN=ALDH2B4 PE=2 SV=1}	{bvg:104894249; K00128 ALDH aldehyde dehydrogenase (NAD+) 1.2.1.3 ko00010; Metabolism; Carbohydrate metabolism; Glycolysis / gluconeogenesis | ko00053; Metabolism; Carbohydrate metabolism; Ascorbate and aldarate metabolism | ko00620; Metabolism; Carbohydrate metabolism; Pyruvate metabolism | ko00071; Metabolism; Lipid metabolism; Fatty acid degradation | ko00561; Metabolism; Lipid metabolism; Gly…	{At3g48000; KOG2450 Aldehyde dehydrogenase C Energy production and conversion ;}	{GO:0008152; NA GO:0055114; oxidation-reduction process; biological_process GO:0016491; oxidoreductase activity; molecular_function}	{XM_010680436.2; PREDICTED: Beta vulgaris subsp. vulgaris aldehyde dehydrogenase family 2 member B4, mitochondrial (LOC104894249), mRNA}	{PF00171:Aldehyde dehydrogenase family}
transcript_HQ_SAB_transcript13765/f2p0/2021	2.5895	1.7604e-13	8.7577e-13	{KNA07058.1; hypothetical protein SOVF_175440 [Spinacia oleracea]}	{sp|Q9SIK1|GLGL4_ARATH; Probable glucose-1-phosphate adenylyltransferase large subunit, chloroplastic OS=Arabidopsis thaliana GN=At2g21590 PE=2 SV=1}	{pvu:PHAVU_009G059800g; K00975 glgC glucose-1-phosphate adenylyltransferase 2.7.7.27 ko00500; Metabolism; Carbohydrate metabolism; Starch and sucrose metabolism | ko00520; Metabolism; Carbohydrate metabolism; Amino sugar and nucleotide sugar metabolism | ko02026; Cellular Processes; Cellular community - prokaryotes; Biofilm formation - Escherichia coli}	{At2g21590; KOG1322 GDP-mannose pyrophosphorylase/mannose-1-phosphate guanylyltransferase M Cell wall/membrane/envelope biogenesis ;}	{NA}	{XM_010692547.2; PREDICTED: Beta vulgaris subsp. vulgaris glucose-1-phosphate adenylyltransferase large subunit 1 (LOC104904329), mRNA}	{NA}
transcript_HQ_SAB_transcript13726/f11p0/1986	0.18703	0.0015502	0.0034567	{KNA21784.1; hypothetical protein SOVF_040340 [Spinacia oleracea]}	{sp|P19595|UGPA_SOLTU; UTP--glucose-1-phosphate uridylyltransferase OS=Solanum tuberosum PE=1 SV=3}	{jcu:105636149; K00963 UGP2, galU, galF UTP--glucose-1-phosphate uridylyltransferase 2.7.7.9 ko00040; Metabolism; Carbohydrate metabolism; Pentose and glucuronate interconversions | ko00052; Metabolism; Carbohydrate metabolism; galactose metabolism | ko00500; Metabolism; Carbohydrate metabolism; Starch and sucrose metabolism | ko00520; Metabolism; Carbohydrate metabolism; Amino sugar and nucleoti…	{At5g17310; KOG2638 UDP-glucose pyrophosphorylase G Carbohydrate transport and metabolism ;}	{GO:0070569; uridylyltransferase activity; molecular_function GO:0008152; NA}	{XM_010696669.2; PREDICTED: Beta vulgaris subsp. vulgaris UTP--glucose-1-phosphate uridylyltransferase (LOC104907700), mRNA}	{PF01704:UTP--glucose-1-phosphate uridylyltransferase}
transcript_HQ_SAB_transcript13688/f2p0/2007	1.9989	6.6016e-245	5.3236e-243	{KNA05271.1; hypothetical protein SOVF_191970 [Spinacia oleracea]}	{sp|O23553|BAM3_ARATH; Beta-amylase 3, chloroplastic OS=Arabidopsis thaliana GN=BAM3 PE=1 SV=3}	{pop:POPTR_0003s03330g; K01177 E3.2.1.2 Beta-amylase 3.2.1.2 ko00500; Metabolism; Carbohydrate metabolism; Starch and sucrose metabolism}	{NA}	{GO:0016161; Beta-amylase activity; molecular_function GO:0000272; polysaccharide catabolic process; biological_process}	{XM_010697150.2; PREDICTED: Beta vulgaris subsp. vulgaris Beta-amylase 3, chloroplastic (LOC104908081), mRNA}	{PF01373:Glycosyl hydrolase family 14}
transcript_HQ_SAB_transcript13635/f2p0/2037	1.893	0.012217	0.023503	{XP_010683420.1; PREDICTED: 2,3-bisphosphoglycerate-independent phosphoglycerate mutase [Beta vulgaris subsp. vulgaris]}	{sp|Q42908|PMGI_MESCR; 2,3-bisphosphoglycerate-independent phosphoglycerate mutase OS=Mesembryanthemum crystallinum GN=PGM1 PE=2 SV=1}	{bvg:104882799; K15633 gpmI 2,3-bisphosphoglycerate-independent phosphoglycerate mutase 5.4.2.12 ko01200; Metabolism; Global and overview maps; Carbon metabolism | ko01230; Metabolism; Global and overview maps; Biosynthesis of amino acids | ko00010; Metabolism; Carbohydrate metabolism; Glycolysis / gluconeogenesis | ko00680; Metabolism; Energy metabolism; Methane metabolism | ko00260; Metabolism;…	{At3g08590; KOG4513 Phosphoglycerate mutase G Carbohydrate transport and metabolism ;}	{GO:0005737; cytoplasm; cellular_component GO:0008152; NA GO:0003824; NA GO:0030145; manganese ion binding; molecular_function GO:0004619; phosphoglycerate mutase activity; molecular_function GO:0006007; glucose catabolic process; biological_process GO:0046872; metal ion binding; molecular_function GO:0016791; phosphatase activity; molecular_function}	{XM_010685118.2; PREDICTED: Beta vulgaris subsp. vulgaris 2,3-bisphosphoglycerate-independent phosphoglycerate mutase (LOC104898105), mRNA}	{PF01676:Metalloenzyme superfamily PF00245:Alkaline phosphatase PF06415:BPG-independent PGAM N-terminus (iPGM_N)}
transcript_HQ_SAB_transcript13634/f2p0/2009	0.81033	0.021908	0.040094	{XP_010688511.1; PREDICTED: xylose isomerase [Beta vulgaris subsp. vulgaris]}	{sp|Q9FKK7|XYLA_ARATH; Xylose isomerase OS=Arabidopsis thaliana GN=XYLA PE=2 SV=2}	{vvi:100254769; K01805 xylA xylose isomerase 5.3.1.5 ko00040; Metabolism; Carbohydrate metabolism; Pentose and glucuronate interconversions | ko00051; Metabolism; Carbohydrate metabolism; Fructose and mannose metabolism}	{NA}	{NA}	{XM_010690209.2; PREDICTED: Beta vulgaris subsp. vulgaris xylose isomerase (LOC104902429), mRNA}	{NA}
transcript_HQ_SAB_transcript13508/f2p0/2002	-1.4267	8.3027e-26	6.6046e-25	{XP_010683420.1; PREDICTED: 2,3-bisphosphoglycerate-independent phosphoglycerate mutase [Beta vulgaris subsp. vulgaris]}	{sp|Q42908|PMGI_MESCR; 2,3-bisphosphoglycerate-independent phosphoglycerate mutase OS=Mesembryanthemum crystallinum GN=PGM1 PE=2 SV=1}	{bvg:104882799; K15633 gpmI 2,3-bisphosphoglycerate-independent phosphoglycerate mutase 5.4.2.12 ko01200; Metabolism; Global and overview maps; Carbon metabolism | ko01230; Metabolism; Global and overview maps; Biosynthesis of amino acids | ko00010; Metabolism; Carbohydrate metabolism; Glycolysis / gluconeogenesis | ko00680; Metabolism; Energy metabolism; Methane metabolism | ko00260; Metabolism;…	{At3g08590; KOG4513 Phosphoglycerate mutase G Carbohydrate transport and metabolism ;}	{GO:0003824; NA GO:0030145; manganese ion binding; molecular_function GO:0008152; NA GO:0005737; cytoplasm; cellular_component GO:0046872; metal ion binding; molecular_function GO:0016791; phosphatase activity; molecular_function GO:0004619; phosphoglycerate mutase activity; molecular_function GO:0006007; glucose catabolic process; biological_process}	{XM_019248139.1; PREDICTED: Beta vulgaris subsp. vulgaris 2,3-bisphosphoglycerate-independent phosphoglycerate mutase (LOC104882799), transcript variant X2, mRNA}	{PF01676:Metalloenzyme superfamily PF00245:Alkaline phosphatase PF06415:BPG-independent PGAM N-terminus (iPGM_N)}
transcript_HQ_SAB_transcript13293/f2p0/2047	0.93053	1.7554e-12	8.2951e-12	{KNA21349.1; hypothetical protein SOVF_044070 [Spinacia oleracea]}	{sp|Q9SQI8|ODP24_ARATH; Dihydrolipoyllysine-residue acetyltransferase component 4 of pyruvate dehydrogenase complex, chloroplastic OS=Arabidopsis thaliana GN=LTA2 PE=2 SV=1}	{sind:105161131; K00627 DLAT, aceF, pdhC pyruvate dehydrogenase E2 component (dihydrolipoamide acetyltransferase) 2.3.1.12 ko01200; Metabolism; Global and overview maps; Carbon metabolism | ko00010; Metabolism; Carbohydrate metabolism; Glycolysis / gluconeogenesis | ko00020; Metabolism; Carbohydrate metabolism; Citrate cycle (TCA cycle) | ko00620; Metabolism; Carbohydrate metabolism; Pyruvate met…	{At3g25860; KOG0557 Dihydrolipoamide acetyltransferase C Energy production and conversion ;}	{GO:0016746; transferase activity, transferring acyl groups; molecular_function GO:0008152; NA}	{XM_010683270.2; PREDICTED: Beta vulgaris subsp. vulgaris dihydrolipoyllysine-residue acetyltransferase component 4 of pyruvate dehydrogenase complex, chloroplastic (LOC104896518), mRNA}	{PF00198:2-oxoacid dehydrogenases acyltransferase (catalytic domain) PF02817:e3 binding domain}
transcript_HQ_SAB_transcript13241/f2p0/2036	2.121	1.9259e-35	1.9927e-34	{KNA05271.1; hypothetical protein SOVF_191970 [Spinacia oleracea]}	{sp|O23553|BAM3_ARATH; Beta-amylase 3, chloroplastic OS=Arabidopsis thaliana GN=BAM3 PE=1 SV=3}	{jcu:105636642; K01177 E3.2.1.2 Beta-amylase 3.2.1.2 ko00500; Metabolism; Carbohydrate metabolism; Starch and sucrose metabolism}	{NA}	{GO:0016161; Beta-amylase activity; molecular_function GO:0000272; polysaccharide catabolic process; biological_process}	{XM_010697150.2; PREDICTED: Beta vulgaris subsp. vulgaris Beta-amylase 3, chloroplastic (LOC104908081), mRNA}	{PF01373:Glycosyl hydrolase family 14}
transcript_HQ_SAB_transcript13193/f4p0/2042	0.12363	0.016913	0.03169	{XP_019106732.1; PREDICTED: glucose-1-phosphate adenylyltransferase large subunit, chloroplastic/amyloplastic isoform X1 [Beta vulgaris subsp. vulgaris]}	{sp|P55233|GLGL1_BETVU; Glucose-1-phosphate adenylyltransferase large subunit, chloroplastic/amyloplastic OS=Beta vulgaris GN=AGPS1 PE=2 SV=1}	{pop:POPTR_0002s03480g; K00975 glgC glucose-1-phosphate adenylyltransferase 2.7.7.27 ko00500; Metabolism; Carbohydrate metabolism; Starch and sucrose metabolism | ko00520; Metabolism; Carbohydrate metabolism; Amino sugar and nucleotide sugar metabolism | ko02026; Cellular Processes; Cellular community - prokaryotes; Biofilm formation - Escherichia coli}	{At1g27680; KOG1322 GDP-mannose pyrophosphorylase/mannose-1-phosphate guanylyltransferase M Cell wall/membrane/envelope biogenesis ;}	{GO:0016779; nucleotidyltransferase activity; molecular_function GO:0009058; biosynthetic process; biological_process}	{XM_019251187.1; PREDICTED: Beta vulgaris subsp. vulgaris glucose-1-phosphate adenylyltransferase large subunit, chloroplastic/amyloplastic (LOC104889614), transcript variant X1, mRNA}	{PF00483:Nucleotidyl transferase}
transcript_HQ_SAB_transcript13118/f3p0/2062	-0.41796	0.00019284	0.00048395	{KNA04660.1; hypothetical protein SOVF_197610 [Spinacia oleracea]}	{sp|Q9SU63|AL2B4_ARATH; Aldehyde dehydrogenase family 2 member B4, mitochondrial OS=Arabidopsis thaliana GN=ALDH2B4 PE=2 SV=1}	{bvg:104894249; K00128 ALDH aldehyde dehydrogenase (NAD+) 1.2.1.3 ko00010; Metabolism; Carbohydrate metabolism; Glycolysis / gluconeogenesis | ko00053; Metabolism; Carbohydrate metabolism; Ascorbate and aldarate metabolism | ko00620; Metabolism; Carbohydrate metabolism; Pyruvate metabolism | ko00071; Metabolism; Lipid metabolism; Fatty acid degradation | ko00561; Metabolism; Lipid metabolism; Gly…	{At3g48000; KOG2450 Aldehyde dehydrogenase C Energy production and conversion ;}	{GO:0016491; oxidoreductase activity; molecular_function GO:0055114; oxidation-reduction process; biological_process GO:0008152; NA}	{XM_010680436.2; PREDICTED: Beta vulgaris subsp. vulgaris aldehyde dehydrogenase family 2 member B4, mitochondrial (LOC104894249), mRNA}	{PF00171:Aldehyde dehydrogenase family}
transcript_HQ_SAB_transcript13063/f11p0/2028	-0.25741	0.0013316	0.0030029	{KNA03995.1; hypothetical protein SOVF_203830 [Spinacia oleracea]}	{sp|P55229|GLGL1_ARATH; Glucose-1-phosphate adenylyltransferase large subunit 1, chloroplastic OS=Arabidopsis thaliana GN=ADG2 PE=1 SV=3}	{var:108323812; K00975 glgC glucose-1-phosphate adenylyltransferase 2.7.7.27 ko00500; Metabolism; Carbohydrate metabolism; Starch and sucrose metabolism | ko00520; Metabolism; Carbohydrate metabolism; Amino sugar and nucleotide sugar metabolism | ko02026; Cellular Processes; Cellular community - prokaryotes; Biofilm formation - Escherichia coli}	{At5g19220; KOG1322 GDP-mannose pyrophosphorylase/mannose-1-phosphate guanylyltransferase M Cell wall/membrane/envelope biogenesis ;}	{GO:0016779; nucleotidyltransferase activity; molecular_function GO:0016772; transferase activity, transferring phosphorus-containing groups; molecular_function GO:0009058; biosynthetic process; biological_process}	{XM_010668476.2; PREDICTED: Beta vulgaris subsp. vulgaris glucose-1-phosphate adenylyltransferase large subunit 3, chloroplastic/amyloplastic (LOC104883901), transcript variant X1, mRNA}	{PF00483:Nucleotidyl transferase PF07959:L-fucokinase}
transcript_HQ_SAB_transcript13032/f2p0/2063	-0.53892	1.8271e-05	5.1768e-05	{KNA26065.1; hypothetical protein SOVF_000610 [Spinacia oleracea]}	{sp|Q94AA4|PFKA3_ARATH; ATP-dependent 6-phosphofructokinase 3 OS=Arabidopsis thaliana GN=PFK3 PE=1 SV=1}	{csv:101202739; K00850 pfkA, PFK 6-phosphofructokinase 1 2.7.1.11 ko01200; Metabolism; Global and overview maps; Carbon metabolism | ko01230; Metabolism; Global and overview maps; Biosynthesis of amino acids | ko00010; Metabolism; Carbohydrate metabolism; Glycolysis / gluconeogenesis | ko00030; Metabolism; Carbohydrate metabolism; pentose phosphate pathway | ko00051; Metabolism; Carbohydrate meta…	{At4g32840; KOG2440 Pyrophosphate-dependent phosphofructo-1-kinase G Carbohydrate transport and metabolism ;}	{GO:0006096; glycolysis; biological_process GO:0003872; 6-phosphofructokinase activity; molecular_function}	{DQ437576.1; Spinacia oleracea putative phosphofructokinase mRNA, complete cds}	{PF00365:Phosphofructokinase}
transcript_HQ_SAB_transcript12654/f12p0/2055	-0.92041	4.0276e-10	1.6536e-09	{XP_010666027.1; PREDICTED: NADP-dependent glyceraldehyde-3-phosphate dehydrogenase [Beta vulgaris subsp. vulgaris]}	{sp|P81406|GAPN_PEA; NADP-dependent glyceraldehyde-3-phosphate dehydrogenase OS=Pisum sativum GN=GAPN PE=1 SV=1}	{bvg:104883240; K00131 gapN glyceraldehyde-3-phosphate dehydrogenase (NADP+) 1.2.1.9 ko01200; Metabolism; Global and overview maps; Carbon metabolism | ko00010; Metabolism; Carbohydrate metabolism; Glycolysis / gluconeogenesis | ko00030; Metabolism; Carbohydrate metabolism; pentose phosphate pathway}	{At2g24270; KOG2450 Aldehyde dehydrogenase C Energy production and conversion ;}	{GO:0008152; NA GO:0055114; oxidation-reduction process; biological_process GO:0016491; oxidoreductase activity; molecular_function}	{XM_010667725.2; PREDICTED: Beta vulgaris subsp. vulgaris NADP-dependent glyceraldehyde-3-phosphate dehydrogenase (LOC104883240), mRNA}	{PF00171:Aldehyde dehydrogenase family}
transcript_HQ_SAB_transcript12525/f3p0/2092	0.61014	4.2309e-09	1.6206e-08	{Q94KU1.1; RecName: Full=6-phosphogluconate dehydrogenase, decarboxylating 1}	{sp|Q94KU1|6PGD1_SPIOL; 6-phosphogluconate dehydrogenase, decarboxylating 1 OS=Spinacia oleracea GN=pgdC PE=1 SV=1}	{vvi:100246134; K00033 PGD, gnd, gntZ 6-phosphogluconate dehydrogenase [EC:1.1.1.44 1.1.1.343] 1.1.1.44,1.1.1.343 ko01200; Metabolism; Global and overview maps; Carbon metabolism | ko00030; Metabolism; Carbohydrate metabolism; pentose phosphate pathway | ko00480; Metabolism; Metabolism of other amino acids; Glutathione metabolism}	{At3g02360; KOG2653 6-phosphogluconate dehydrogenase G Carbohydrate transport and metabolism ;}	{GO:0006631; fatty acid metabolic process; biological_process GO:0016491; oxidoreductase activity; molecular_function GO:0055114; oxidation-reduction process; biological_process GO:0006098; pentose-phosphate shunt; biological_process GO:0004616; phosphogluconate dehydrogenase (decarboxylating) activity; molecular_function GO:0003857; 3-hydroxyacyl-CoA dehydrogenase activity; molecular_function}	{XM_010683006.2; PREDICTED: Beta vulgaris subsp. vulgaris 6-phosphogluconate dehydrogenase, decarboxylating 1 (LOC104896287), mRNA}	{PF03446:NAD binding domain of 6-phosphogluconate dehydrogenase PF02737:3-hydroxyacyl-CoA dehydrogenase, NAD binding domain PF00393:6-phosphogluconate dehydrogenase, C-terminal domain}
transcript_HQ_SAB_transcript12522/f6p0/2008	0.59273	3.5923e-09	1.3848e-08	{XP_010682575.1; PREDICTED: aldehyde dehydrogenase family 2 member B7, mitochondrial isoform X1 [Beta vulgaris subsp. vulgaris]}	{sp|Q8S528|AL2B7_ARATH; Aldehyde dehydrogenase family 2 member B7, mitochondrial OS=Arabidopsis thaliana GN=ALDH2B7 PE=2 SV=2}	{gmx:100786773; K00128 ALDH aldehyde dehydrogenase (NAD+) 1.2.1.3 ko00010; Metabolism; Carbohydrate metabolism; Glycolysis / gluconeogenesis | ko00053; Metabolism; Carbohydrate metabolism; Ascorbate and aldarate metabolism | ko00620; Metabolism; Carbohydrate metabolism; Pyruvate metabolism | ko00071; Metabolism; Lipid metabolism; Fatty acid degradation | ko00561; Metabolism; Lipid metabolism; Gly…	{At1g23800; KOG2450 Aldehyde dehydrogenase C Energy production and conversion ;}	{GO:0008152; NA GO:0016491; oxidoreductase activity; molecular_function GO:0055114; oxidation-reduction process; biological_process}	{XM_010684273.2; PREDICTED: Beta vulgaris subsp. vulgaris aldehyde dehydrogenase family 2 member B7, mitochondrial (LOC104897405), transcript variant X1, mRNA}	{PF00171:Aldehyde dehydrogenase family}
transcript_HQ_SAB_transcript12497/f6p0/2082	0.66696	0.0001991	0.00049907	{Q94KU1.1; RecName: Full=6-phosphogluconate dehydrogenase, decarboxylating 1}	{sp|Q94KU1|6PGD1_SPIOL; 6-phosphogluconate dehydrogenase, decarboxylating 1 OS=Spinacia oleracea GN=pgdC PE=1 SV=1}	{vvi:100246134; K00033 PGD, gnd, gntZ 6-phosphogluconate dehydrogenase [EC:1.1.1.44 1.1.1.343] 1.1.1.44,1.1.1.343 ko01200; Metabolism; Global and overview maps; Carbon metabolism | ko00030; Metabolism; Carbohydrate metabolism; pentose phosphate pathway | ko00480; Metabolism; Metabolism of other amino acids; Glutathione metabolism}	{At3g02360; KOG2653 6-phosphogluconate dehydrogenase G Carbohydrate transport and metabolism ;}	{GO:0006098; pentose-phosphate shunt; biological_process GO:0055114; oxidation-reduction process; biological_process GO:0016491; oxidoreductase activity; molecular_function GO:0006631; fatty acid metabolic process; biological_process GO:0004616; phosphogluconate dehydrogenase (decarboxylating) activity; molecular_function GO:0003857; 3-hydroxyacyl-CoA dehydrogenase activity; molecular_function}	{XM_010683006.2; PREDICTED: Beta vulgaris subsp. vulgaris 6-phosphogluconate dehydrogenase, decarboxylating 1 (LOC104896287), mRNA}	{PF03446:NAD binding domain of 6-phosphogluconate dehydrogenase PF00393:6-phosphogluconate dehydrogenase, C-terminal domain PF02737:3-hydroxyacyl-CoA dehydrogenase, NAD binding domain}
transcript_HQ_SAB_transcript12294/f2p0/2108	-0.62668	0.0053375	0.010966	{KNA26065.1; hypothetical protein SOVF_000610 [Spinacia oleracea]}	{sp|Q94AA4|PFKA3_ARATH; ATP-dependent 6-phosphofructokinase 3 OS=Arabidopsis thaliana GN=PFK3 PE=1 SV=1}	{vra:106762554; K00850 pfkA, PFK 6-phosphofructokinase 1 2.7.1.11 ko01200; Metabolism; Global and overview maps; Carbon metabolism | ko01230; Metabolism; Global and overview maps; Biosynthesis of amino acids | ko00010; Metabolism; Carbohydrate metabolism; Glycolysis / gluconeogenesis | ko00030; Metabolism; Carbohydrate metabolism; pentose phosphate pathway | ko00051; Metabolism; Carbohydrate meta…	{At4g32840; KOG2440 Pyrophosphate-dependent phosphofructo-1-kinase G Carbohydrate transport and metabolism ;}	{GO:0016301; kinase activity; molecular_function GO:0006096; glycolysis; biological_process GO:0003872; 6-phosphofructokinase activity; molecular_function}	{DQ437576.1; Spinacia oleracea putative phosphofructokinase mRNA, complete cds}	{PF00365:Phosphofructokinase PF00781:Diacylglycerol kinase catalytic domain}
transcript_HQ_SAB_transcript12243/f3p0/2115	-2.2345	0.0015635	0.0034831	{XP_010677904.1; PREDICTED: beta-glucosidase 13 [Beta vulgaris subsp. vulgaris]}	{sp|B8AVF0|BGL12_ORYSI; Beta-glucosidase 12 OS=Oryza sativa subsp. indica GN=BGLU12 PE=3 SV=1}	{bvg:104893499; K01188 E3.2.1.21 beta-glucosidase 3.2.1.21 ko00500; Metabolism; Carbohydrate metabolism; Starch and sucrose metabolism | ko00460; Metabolism; Metabolism of other amino acids; Cyanoamino acid metabolism | ko00940; Metabolism; Biosynthesis of other secondary metabolites; Phenylpropanoid biosynthesis}	{At3g60130; KOG0626 Beta-glucosidase, lactase phlorizinhydrolase, and related proteins G Carbohydrate transport and metabolism ;}	{GO:0005975; carbohydrate metabolic process; biological_process GO:0004553; hydrolase activity, hydrolyzing O-glycosyl compounds; molecular_function}	{XM_010679602.2; PREDICTED: Beta vulgaris subsp. vulgaris beta-glucosidase 13 (LOC104893499), mRNA}	{PF00232:Glycosyl hydrolase family 1 PF00150:Cellulase (glycosyl hydrolase family 5)}
transcript_HQ_SAB_transcript12236/f2p0/2108	Inf	4.3056e-07	1.4241e-06	{KNA04660.1; hypothetical protein SOVF_197610 [Spinacia oleracea]}	{sp|Q9SU63|AL2B4_ARATH; Aldehyde dehydrogenase family 2 member B4, mitochondrial OS=Arabidopsis thaliana GN=ALDH2B4 PE=2 SV=1}	{bvg:104894249; K00128 ALDH aldehyde dehydrogenase (NAD+) 1.2.1.3 ko00010; Metabolism; Carbohydrate metabolism; Glycolysis / gluconeogenesis | ko00053; Metabolism; Carbohydrate metabolism; Ascorbate and aldarate metabolism | ko00620; Metabolism; Carbohydrate metabolism; Pyruvate metabolism | ko00071; Metabolism; Lipid metabolism; Fatty acid degradation | ko00561; Metabolism; Lipid metabolism; Gly…	{At3g48000; KOG2450 Aldehyde dehydrogenase C Energy production and conversion ;}	{GO:0016491; oxidoreductase activity; molecular_function GO:0055114; oxidation-reduction process; biological_process GO:0008152; NA}	{XM_010680436.2; PREDICTED: Beta vulgaris subsp. vulgaris aldehyde dehydrogenase family 2 member B4, mitochondrial (LOC104894249), mRNA}	{PF00171:Aldehyde dehydrogenase family}
transcript_HQ_SAB_transcript12235/f5p0/2102	1.1836	0.009951	0.019492	{XP_010693684.1; PREDICTED: trehalose-phosphate phosphatase A [Beta vulgaris subsp. vulgaris]}	{sp|O64896|TPPA_ARATH; Trehalose-phosphate phosphatase A OS=Arabidopsis thaliana GN=TPPA PE=1 SV=1}	{vra:106756237; K01087 otsB trehalose 6-phosphate phosphatase 3.1.3.12 ko00500; Metabolism; Carbohydrate metabolism; Starch and sucrose metabolism}	{At5g51460; KOG1050 Trehalose-6-phosphate synthase component TPS1 and related subunits G Carbohydrate transport and metabolism ;}	{GO:0003824; NA GO:0016740; transferase activity; molecular_function GO:0005992; trehalose biosynthetic process; biological_process}	{XM_010695382.2; PREDICTED: Beta vulgaris subsp. vulgaris trehalose-phosphate phosphatase A (LOC104906608), transcript variant X1, mRNA}	{PF00765:Autoinducer synthase PF02358:Trehalose-phosphatase}
transcript_HQ_SAB_transcript11954/f2p0/2135	0.127	0.0181	0.033707	{KNA26065.1; hypothetical protein SOVF_000610 [Spinacia oleracea]}	{sp|Q94AA4|PFKA3_ARATH; ATP-dependent 6-phosphofructokinase 3 OS=Arabidopsis thaliana GN=PFK3 PE=1 SV=1}	{csv:101202739; K00850 pfkA, PFK 6-phosphofructokinase 1 2.7.1.11 ko01200; Metabolism; Global and overview maps; Carbon metabolism | ko01230; Metabolism; Global and overview maps; Biosynthesis of amino acids | ko00010; Metabolism; Carbohydrate metabolism; Glycolysis / Gluconeogenesis | ko00030; Metabolism; Carbohydrate metabolism; Pentose phosphate pathway | ko00051; Metabolism; Carbohydrate meta…	{At4g32840; KOG2440 Pyrophosphate-dependent phosphofructo-1-kinase G Carbohydrate transport and metabolism ;}	{GO:0003872; 6-phosphofructokinase activity; molecular_function GO:0006096; glycolysis; biological_process}	{DQ437576.1; Spinacia oleracea putative phosphofructokinase mRNA, complete cds}	{PF00365:Phosphofructokinase}
transcript_HQ_SAB_transcript11906/f2p0/2157	0.50342	3.4788e-17	2.0531e-16	{KNA25937.1; hypothetical protein SOVF_002030 [Spinacia oleracea]}	{sp|Q2RAK2|KPYC1_ORYSJ; Pyruvate kinase 1, cytosolic OS=Oryza sativa subsp. japonica GN=Os11g0148500 PE=1 SV=1}	{bvg:104889468; K00873 PK, pyk pyruvate kinase 2.7.1.40 ko01200; Metabolism; Global and overview maps; Carbon metabolism | ko01230; Metabolism; Global and overview maps; Biosynthesis of amino acids | ko00010; Metabolism; Carbohydrate metabolism; Glycolysis / gluconeogenesis | ko00620; Metabolism; Carbohydrate metabolism; Pyruvate metabolism | ko00230; Metabolism; Nucleotide metabolism; Purine met…	{At3g52990; KOG2323 Pyruvate kinase G Carbohydrate transport and metabolism ;}	{GO:0006096; glycolysis; biological_process GO:0004743; pyruvate kinase activity; molecular_function GO:0003824; NA GO:0030955; potassium ion binding; molecular_function GO:0000287; magnesium ion binding; molecular_function}	{XM_010674695.2; PREDICTED: Beta vulgaris subsp. vulgaris pyruvate kinase 2, cytosolic (LOC104889468), mRNA}	{PF03328:HpcH/HpaI aldolase/citrate lyase family PF00224:Pyruvate kinase, barrel domain}
transcript_HQ_SAB_transcript11898/f2p0/2144	3.3863	4.9968e-06	1.4953e-05	{KNA05973.1; hypothetical protein SOVF_185400 [Spinacia oleracea]}	{sp|Q9SRW9|CSLD5_ARATH; Cellulose synthase-like protein D5 OS=Arabidopsis thaliana GN=CSLD5 PE=2 SV=1}	{ath:AT1G02730; K00770 E2.4.2.24 1,4-beta-D-xylan synthase 2.4.2.24 ko00520; Metabolism; Carbohydrate metabolism; Amino sugar and nucleotide sugar metabolism}	{NA}	{GO:0030244; cellulose biosynthetic process; biological_process GO:0016760; cellulose synthase (UDP-forming) activity; molecular_function GO:0016020; membrane; cellular_component}	{XM_010686289.2; PREDICTED: Beta vulgaris subsp. vulgaris cellulose synthase-like protein D5 (LOC104899148), transcript variant X2, mRNA}	{PF03552:Cellulose synthase}
transcript_HQ_SAB_transcript11849/f2p0/2155	-2.6493	2.3013e-14	1.1932e-13	{XP_010681044.1; PREDICTED: ATP-dependent 6-phosphofructokinase 5, chloroplastic [Beta vulgaris subsp. vulgaris]}	{sp|Q8VYN6|PFKA5_ARATH; ATP-dependent 6-phosphofructokinase 5, chloroplastic OS=Arabidopsis thaliana GN=PFK5 PE=1 SV=1}	{rcu:8267060; K00850 pfkA, PFK 6-phosphofructokinase 1 2.7.1.11 ko01200; Metabolism; Global and overview maps; Carbon metabolism | ko01230; Metabolism; Global and overview maps; Biosynthesis of amino acids | ko00010; Metabolism; Carbohydrate metabolism; Glycolysis / Gluconeogenesis | ko00030; Metabolism; Carbohydrate metabolism; Pentose phosphate pathway | ko00051; Metabolism; Carbohydrate metabo…	{At2g22480; KOG2440 Pyrophosphate-dependent phosphofructo-1-kinase G Carbohydrate transport and metabolism ;}	{GO:0016301; kinase activity; molecular_function GO:0006096; glycolysis; biological_process GO:0003872; 6-phosphofructokinase activity; molecular_function}	{XM_010682742.2; PREDICTED: Beta vulgaris subsp. vulgaris ATP-dependent 6-phosphofructokinase 5, chloroplastic (LOC104896058), mRNA}	{PF00781:Diacylglycerol kinase catalytic domain PF00365:Phosphofructokinase}
transcript_HQ_SAB_transcript11796/f4p0/2088	0.86937	1.4681e-19	9.4888e-19	{KNA14000.1; hypothetical protein SOVF_111540 [Spinacia oleracea]}	{sp|P81406|GAPN_PEA; NADP-dependent glyceraldehyde-3-phosphate dehydrogenase OS=Pisum sativum GN=GAPN PE=1 SV=1}	{bvg:104883240; K00131 gapN glyceraldehyde-3-phosphate dehydrogenase (NADP+) 1.2.1.9 ko01200; Metabolism; Global and overview maps; Carbon metabolism | ko00010; Metabolism; Carbohydrate metabolism; Glycolysis / gluconeogenesis | ko00030; Metabolism; Carbohydrate metabolism; pentose phosphate pathway}	{At2g24270; KOG2450 Aldehyde dehydrogenase C Energy production and conversion ;}	{GO:0008152; NA GO:0055114; oxidation-reduction process; biological_process GO:0016491; oxidoreductase activity; molecular_function}	{XM_010667725.2; PREDICTED: Beta vulgaris subsp. vulgaris NADP-dependent glyceraldehyde-3-phosphate dehydrogenase (LOC104883240), mRNA}	{PF00171:Aldehyde dehydrogenase family}
transcript_HQ_SAB_transcript11657/f4p0/2145	-0.16584	0.022987	0.041904	{KNA06151.1; hypothetical protein SOVF_183760 [Spinacia oleracea]}	{sp|Q9FJI5|G6PD6_ARATH; Glucose-6-phosphate 1-dehydrogenase, cytoplasmic isoform 2 OS=Arabidopsis thaliana GN=ACG12 PE=2 SV=1}	{bvg:104895811; K00036 G6PD, zwf glucose-6-phosphate 1-dehydrogenase [EC:1.1.1.49 1.1.1.363] 1.1.1.49,1.1.1.363 ko01200; Metabolism; Global and overview maps; Carbon metabolism | ko00030; Metabolism; Carbohydrate metabolism; pentose phosphate pathway | ko00480; Metabolism; Metabolism of other amino acids; Glutathione metabolism | ko05230; Human Diseases; Cancers: Overview; Central carbon metaboli…	{At5g40760; KOG0563 Glucose-6-phosphate 1-dehydrogenase G Carbohydrate transport and metabolism ;}	{GO:0006006; glucose metabolic process; biological_process GO:0050661; NADP binding; molecular_function GO:0004345; glucose-6-phosphate dehydrogenase activity; molecular_function GO:0055114; oxidation-reduction process; biological_process}	{XM_010682427.2; PREDICTED: Beta vulgaris subsp. vulgaris glucose-6-phosphate 1-dehydrogenase, cytoplasmic (LOC104895811), mRNA}	{PF02781:Glucose-6-phosphate dehydrogenase, C-terminal domain PF00479:Glucose-6-phosphate dehydrogenase, NAD binding domain}
transcript_HQ_SAB_transcript11622/f5p0/2160	Inf	4.597e-06	1.3806e-05	{XP_010693684.1; PREDICTED: trehalose-phosphate phosphatase A [Beta vulgaris subsp. vulgaris]}	{sp|O64896|TPPA_ARATH; Trehalose-phosphate phosphatase A OS=Arabidopsis thaliana GN=TPPA PE=1 SV=1}	{vra:106756237; K01087 otsB trehalose 6-phosphate phosphatase 3.1.3.12 ko00500; Metabolism; Carbohydrate metabolism; Starch and sucrose metabolism}	{At5g51460; KOG1050 Trehalose-6-phosphate synthase component TPS1 and related subunits G Carbohydrate transport and metabolism ;}	{GO:0003824; NA GO:0005992; trehalose biosynthetic process; biological_process GO:0016740; transferase activity; molecular_function}	{XM_010695382.2; PREDICTED: Beta vulgaris subsp. vulgaris trehalose-phosphate phosphatase A (LOC104906608), transcript variant X1, mRNA}	{PF02358:Trehalose-phosphatase PF00765:Autoinducer synthase}
transcript_HQ_SAB_transcript11595/f4p0/2144	Inf	0.0038981	0.0081844	{XP_019082902.1; PREDICTED: transketolase-1, chloroplastic [Camelina sativa]}	{sp|Q9D4D4|TKTL2_MOUSE; Transketolase-like protein 2 OS=Mus musculus GN=Tktl2 PE=1 SV=1}	{aip:107625942; K00615 E2.2.1.1, tktA, tktB transketolase 2.2.1.1 ko01200; Metabolism; Global and overview maps; Carbon metabolism | ko01230; Metabolism; Global and overview maps; Biosynthesis of amino acids | ko00030; Metabolism; Carbohydrate metabolism; pentose phosphate pathway | ko00710; Metabolism; Energy metabolism; Carbon fixation in photosynthetic organisms | ko01051; Metabolism; Metaboli…	{7299065; KOG0523 Transketolase G Carbohydrate transport and metabolism ;}	{GO:0008152; NA GO:0016624; oxidoreductase activity, acting on the aldehyde or oxo group of donors, disulfide as acceptor; molecular_function GO:0003824; NA GO:0008661; 1-deoxy-D-xylulose-5-phosphate synthase activity; molecular_function GO:0030976; thiamine pyrophosphate binding; molecular_function GO:0016114; terpenoid biosynthetic process; biological_process}	{NA}	{PF02775:Thiamine pyrophosphate enzyme, C-terminal TPP binding domain PF00676:Dehydrogenase E1 component PF13292:1-deoxy-D-xylulose-5-phosphate synthase}
transcript_HQ_SAB_transcript11564/f4p0/2229	1.572	1.7905e-08	6.5689e-08	{KNA14000.1; hypothetical protein SOVF_111540 [Spinacia oleracea]}	{sp|P81406|GAPN_PEA; NADP-dependent glyceraldehyde-3-phosphate dehydrogenase OS=Pisum sativum GN=GAPN PE=1 SV=1}	{bvg:104883240; K00131 gapN glyceraldehyde-3-phosphate dehydrogenase (NADP+) 1.2.1.9 ko01200; Metabolism; Global and overview maps; Carbon metabolism | ko00010; Metabolism; Carbohydrate metabolism; Glycolysis / gluconeogenesis | ko00030; Metabolism; Carbohydrate metabolism; pentose phosphate pathway}	{At2g24270; KOG2450 Aldehyde dehydrogenase C Energy production and conversion ;}	{GO:0008152; NA GO:0055114; oxidation-reduction process; biological_process GO:0016491; oxidoreductase activity; molecular_function}	{XM_010667725.2; PREDICTED: Beta vulgaris subsp. vulgaris NADP-dependent glyceraldehyde-3-phosphate dehydrogenase (LOC104883240), mRNA}	{PF00171:Aldehyde dehydrogenase family}
transcript_HQ_SAB_transcript11500/f2p0/2178	1.2134	0.0076511	0.015323	{O82059.2; RecName: Full=Glucose-6-phosphate isomerase, cytosolic; Short=GPI; AltName: Full=Phosphoglucose isomerase; Short=PGI; AltName: Full=Phosphohexose isomerase; Short=PHI}	{sp|O82059|G6PI_SPIOL; Glucose-6-phosphate isomerase, cytosolic OS=Spinacia oleracea GN=PGIC PE=2 SV=2}	{bvg:104893126; K01810 GPI, pgi glucose-6-phosphate isomerase 5.3.1.9 ko01200; Metabolism; Global and overview maps; Carbon metabolism | ko00010; Metabolism; Carbohydrate metabolism; Glycolysis / gluconeogenesis | ko00030; Metabolism; Carbohydrate metabolism; pentose phosphate pathway | ko00500; Metabolism; Carbohydrate metabolism; Starch and sucrose metabolism | ko00520; Metabolism; Carbohydrate…	{At5g42740; KOG2446 Glucose-6-phosphate isomerase G Carbohydrate transport and metabolism ;}	{GO:0006096; glycolysis; biological_process GO:0004347; glucose-6-phosphate isomerase activity; molecular_function GO:0006094; gluconeogenesis; biological_process}	{AJ000266.1; Spinacia oleracea mRNA for cytosolic glucose-6-phosphate isomerase}	{PF00342:Phosphoglucose isomerase}
transcript_HQ_SAB_transcript11378/f11p0/2137	0.32652	3.6858e-05	0.000101	{XP_010690849.1; PREDICTED: glucose-1-phosphate adenylyltransferase large subunit 1 [Beta vulgaris subsp. vulgaris]}	{sp|Q00081|GLGL1_SOLTU; Glucose-1-phosphate adenylyltransferase large subunit 1 (Fragment) OS=Solanum tuberosum GN=AGPS1 PE=2 SV=1}	{spen:107008126; K00975 glgC glucose-1-phosphate adenylyltransferase 2.7.7.27 ko00500; Metabolism; Carbohydrate metabolism; Starch and sucrose metabolism | ko00520; Metabolism; Carbohydrate metabolism; Amino sugar and nucleotide sugar metabolism | ko02026; Cellular Processes; Cellular community - prokaryotes; Biofilm formation - Escherichia coli; spen:107008126; K00975 glgC glucose-1-phosphate ad…	{At4g39210; KOG1322 GDP-mannose pyrophosphorylase/mannose-1-phosphate guanylyltransferase M Cell wall/membrane/envelope biogenesis ;}	{GO:0016772; transferase activity, transferring phosphorus-containing groups; molecular_function GO:0016779; nucleotidyltransferase activity; molecular_function GO:0009058; biosynthetic process; biological_process}	{XM_010692547.2; PREDICTED: Beta vulgaris subsp. vulgaris glucose-1-phosphate adenylyltransferase large subunit 1 (LOC104904329), mRNA}	{PF00483:Nucleotidyl transferase PF07959:L-fucokinase}
transcript_HQ_SAB_transcript11228/f7p0/2176	1.6642	2.5942e-87	6.4558e-86	{XP_010686769.1; PREDICTED: pyrophosphate--fructose 6-phosphate 1-phosphotransferase subunit beta [Beta vulgaris subsp. vulgaris]}	{sp|P21343|PFPB_SOLTU; Pyrophosphate--fructose 6-phosphate 1-phosphotransferase subunit beta OS=Solanum tuberosum GN=PFP-BETA PE=1 SV=3}	{cmo:103484643; K00895 pfp, PFP diphosphate-dependent phosphofructokinase 2.7.1.90 ko00010; Metabolism; Carbohydrate metabolism; Glycolysis / gluconeogenesis | ko00030; Metabolism; Carbohydrate metabolism; pentose phosphate pathway | ko00051; Metabolism; Carbohydrate metabolism; Fructose and mannose metabolism}	{At1g12000; KOG2440 Pyrophosphate-dependent phosphofructo-1-kinase G Carbohydrate transport and metabolism ;}	{GO:0006096; glycolysis; biological_process GO:0003872; 6-phosphofructokinase activity; molecular_function}	{XM_010688467.2; PREDICTED: Beta vulgaris subsp. vulgaris pyrophosphate--fructose 6-phosphate 1-phosphotransferase subunit beta (LOC104900934), mRNA}	{PF00365:Phosphofructokinase}
transcript_HQ_SAB_transcript10820/f3p0/2261	0.18733	0.014228	0.027019	{XP_017235087.1; PREDICTED: pyruvate kinase 1, cytosolic-like [Daucus carota subsp. sativus]}	{sp|Q2RAK2|KPYC1_ORYSJ; Pyruvate kinase 1, cytosolic OS=Oryza sativa subsp. japonica GN=Os11g0148500 PE=1 SV=1}	{gmx:100804313; K00873 PK, pyk pyruvate kinase 2.7.1.40 ko01200; Metabolism; Global and overview maps; Carbon metabolism | ko01230; Metabolism; Global and overview maps; Biosynthesis of amino acids | ko00010; Metabolism; Carbohydrate metabolism; Glycolysis / gluconeogenesis | ko00620; Metabolism; Carbohydrate metabolism; Pyruvate metabolism | ko00230; Metabolism; Nucleotide metabolism; Purine met…	{At3g52990; KOG2323 Pyruvate kinase G Carbohydrate transport and metabolism ;}	{GO:0006096; glycolysis; biological_process GO:0008703; 5-amino-6-(5-phosphoribosylamino)uracil reductase activity; molecular_function GO:0009231; riboflavin biosynthetic process; biological_process GO:0004743; pyruvate kinase activity; molecular_function GO:0000287; magnesium ion binding; molecular_function GO:0030955; potassium ion binding; molecular_function GO:0055114; oxidation-reduction pro…	{XM_010279966.2; PREDICTED: Nelumbo nucifera pyruvate kinase 1, cytosolic (LOC104612526), mRNA}	{PF00224:Pyruvate kinase, barrel domain PF01872:RibD C-terminal domain}
transcript_HQ_SAB_transcript10706/f4p0/2232	0.49357	0.00078355	0.0018236	{XP_010696262.1; PREDICTED: galacturonosyltransferase 8 [Beta vulgaris subsp. vulgaris]}	{sp|Q9LSG3|GAUT8_ARATH; Galacturonosyltransferase 8 OS=Arabidopsis thaliana GN=GAUT8 PE=1 SV=1}	{rcu:8279036; K13648 GAUT alpha-1,4-galacturonosyltransferase 2.4.1.43 ko00520; Metabolism; Carbohydrate metabolism; Amino sugar and nucleotide sugar metabolism}	{NA}	{GO:0016757; transferase activity, transferring glycosyl groups; molecular_function}	{XM_010697960.2; PREDICTED: Beta vulgaris subsp. vulgaris galacturonosyltransferase 8 (LOC104908805), mRNA}	{PF01501:Glycosyl transferase family 8}
transcript_HQ_SAB_transcript10282/f3p0/2315	-0.59815	0.0095458	0.018759	{XP_010694564.1; PREDICTED: probable galacturonosyltransferase 9 [Beta vulgaris subsp. vulgaris]}	{sp|Q9FWA4|GAUT9_ARATH; Probable galacturonosyltransferase 9 OS=Arabidopsis thaliana GN=GAUT9 PE=2 SV=1}	{bvg:104907343; K13648 GAUT alpha-1,4-galacturonosyltransferase 2.4.1.43 ko00520; Metabolism; Carbohydrate metabolism; Amino sugar and nucleotide sugar metabolism}	{NA}	{GO:0016757; transferase activity, transferring glycosyl groups; molecular_function}	{XM_010696262.2; PREDICTED: Beta vulgaris subsp. vulgaris probable galacturonosyltransferase 9 (LOC104907343), mRNA}	{PF01501:Glycosyl transferase family 8}
transcript_HQ_SAB_transcript10225/f3p0/2280	0.41312	4.8524e-05	0.00013102	{XP_010685489.1; PREDICTED: uncharacterized protein LOC104899896 [Beta vulgaris subsp. vulgaris]}	{sp|A7LXU3|BGH3B_BACO1; Beta-glucosidase BoGH3B OS=Bacteroides ovatus (strain ATCC 8483 / DSM 1896 / JCM 5824 / NCTC 11153) GN=BACOVA_02659 PE=1 SV=1}	{cic:CICLE_v10028018mg; K05349 bglX beta-glucosidase 3.2.1.21 ko00500; Metabolism; Carbohydrate metabolism; Starch and sucrose metabolism | ko00460; Metabolism; Metabolism of other amino acids; Cyanoamino acid metabolism | ko00940; Metabolism; Biosynthesis of other secondary metabolites; Phenylpropanoid biosynthesis}	{NA}	{GO:0005975; carbohydrate metabolic process; biological_process GO:0004553; hydrolase activity, hydrolyzing O-glycosyl compounds; molecular_function}	{XM_010687187.2; PREDICTED: Beta vulgaris subsp. vulgaris beta-glucosidase BoGH3B (LOC104899896), mRNA}	{PF01915:Glycosyl hydrolase family 3 C-terminal domain PF00933:Glycosyl hydrolase family 3 N terminal domain}
transcript_HQ_SAB_transcript10046/f2p0/2308	-0.84945	0.024671	0.044673	{XP_010679415.1; PREDICTED: LOW QUALITY PROTEIN: stachyose synthase-like [Beta vulgaris subsp. vulgaris]}	{sp|Q93XK2|STSYN_PEA; Stachyose synthase OS=Pisum sativum GN=STS1 PE=1 SV=1}	{bvg:104894790; K06611 E2.4.1.67 stachyose synthetase 2.4.1.67 ko00052; Metabolism; Carbohydrate metabolism; galactose metabolism}	{NA}	{GO:0005975; carbohydrate metabolic process; biological_process GO:0004557; alpha-galactosidase activity; molecular_function GO:0031083; BLOC-1 complex; cellular_component GO:0030133; transport vesicle; cellular_component}	{XM_010681113.2; PREDICTED: Beta vulgaris subsp. vulgaris stachyose synthase-like (LOC104894790), mRNA}	{PF14942:Organelle biogenesis, Muted-like protein PF02065:Melibiase}
transcript_HQ_SAB_transcript10038/f6p0/2285	0.41517	1.7032e-12	8.0521e-12	{XP_010681915.1; PREDICTED: phosphoglucomutase, cytoplasmic [Beta vulgaris subsp. vulgaris]}	{sp|P93262|PGMC_MESCR; Phosphoglucomutase, cytoplasmic OS=Mesembryanthemum crystallinum GN=PGM1 PE=2 SV=1}	{sind:105156218; K01835 pgm phosphoglucomutase 5.4.2.2 ko00010; Metabolism; Carbohydrate metabolism; Glycolysis / Gluconeogenesis | ko00030; Metabolism; Carbohydrate metabolism; Pentose phosphate pathway | ko00052; Metabolism; Carbohydrate metabolism; Galactose metabolism | ko00500; Metabolism; Carbohydrate metabolism; Starch and sucrose metabolism | ko00520; Metabolism; Carbohydrate metabolism; …	{At1g23190; KOG0625 Phosphoglucomutase G Carbohydrate transport and metabolism ;}	{GO:0016868; intramolecular transferase activity, phosphotransferases; molecular_function GO:0005975; carbohydrate metabolic process; biological_process GO:0071704; organic substance metabolic process; biological_process}	{XM_010683613.2; PREDICTED: Beta vulgaris subsp. vulgaris phosphoglucomutase, cytoplasmic (LOC104896820), mRNA}	{PF02879:Phosphoglucomutase/phosphomannomutase, alpha/beta/alpha domain II PF02880:Phosphoglucomutase/phosphomannomutase, alpha/beta/alpha domain III PF00408:Phosphoglucomutase/phosphomannomutase, C-terminal domain PF02878:Phosphoglucomutase/phosphomannomutase, alpha/beta/alpha domain I}
transcript_HQ_BAB_transcript9935/f3p0/2581	-0.8267	3.1209e-08	1.1267e-07	{KMT07822.1; hypothetical protein BVRB_6g146340 [Beta vulgaris subsp. vulgaris]}	{sp|B9DGD6|ACS_ARATH; Acetyl-coenzyme A synthetase, chloroplastic/glyoxysomal OS=Arabidopsis thaliana GN=ACS PE=1 SV=1}	{csv:101203579; K01895 ACSS, acs acetyl-CoA synthetase 6.2.1.1 ko01200; Metabolism; Global and overview maps; Carbon metabolism | ko00010; Metabolism; Carbohydrate metabolism; Glycolysis / gluconeogenesis | ko00620; Metabolism; Carbohydrate metabolism; Pyruvate metabolism | ko00640; Metabolism; Carbohydrate metabolism; Propanoate metabolism | ko00720; Metabolism; Energy metabolism; Carbon fixatio…	{At5g36880; KOG1175 Acyl-CoA synthetase I Lipid transport and metabolism ;}	{NA}	{XM_010683270.2; PREDICTED: Beta vulgaris subsp. vulgaris dihydrolipoyllysine-residue acetyltransferase component 4 of pyruvate dehydrogenase complex, chloroplastic (LOC104896518), mRNA}	{NA}
transcript_HQ_BAB_transcript9737/f4p0/2575	0.49819	0.0026218	0.0056593	{KNA04475.1; hypothetical protein SOVF_199130 [Spinacia oleracea]}	{sp|Q9ZVI7|GAUT7_ARATH; Probable galacturonosyltransferase 7 OS=Arabidopsis thaliana GN=GAUT7 PE=1 SV=2}	{egr:104433438; K13648 GAUT alpha-1,4-galacturonosyltransferase 2.4.1.43 ko00520; Metabolism; Carbohydrate metabolism; Amino sugar and nucleotide sugar metabolism}	{NA}	{GO:0016757; transferase activity, transferring glycosyl groups; molecular_function}	{XM_010694708.2; PREDICTED: Beta vulgaris subsp. vulgaris probable galacturonosyltransferase 7 (LOC104906023), transcript variant X1, mRNA}	{PF01501:Glycosyl transferase family 8}
transcript_HQ_BAB_transcript9715/f2p0/2600	0.65454	1.8738e-31	1.7471e-30	{KNA17728.1; hypothetical protein SOVF_077450 [Spinacia oleracea]}	{sp|O20250|TKTC_SPIOL; Transketolase, chloroplastic OS=Spinacia oleracea PE=1 SV=1}	{bvg:104888662; K00615 E2.2.1.1, tktA, tktB transketolase 2.2.1.1 ko01200; Metabolism; Global and overview maps; Carbon metabolism | ko01230; Metabolism; Global and overview maps; Biosynthesis of amino acids | ko00030; Metabolism; Carbohydrate metabolism; pentose phosphate pathway | ko00710; Metabolism; Energy metabolism; Carbon fixation in photosynthetic organisms | ko01051; Metabolism; Metaboli…	{At3g60750; KOG0523 Transketolase G Carbohydrate transport and metabolism ;}	{GO:0008152; NA GO:0016624; oxidoreductase activity, acting on the aldehyde or oxo group of donors, disulfide as acceptor; molecular_function}	{XM_010673689.2; PREDICTED: Beta vulgaris subsp. vulgaris transketolase, chloroplastic (LOC104888662), mRNA}	{PF00676:Dehydrogenase E1 component}
transcript_HQ_BAB_transcript9520/f2p0/2642	0.17503	0.0098545	0.019327	{XP_010682211.1; PREDICTED: acetyl-coenzyme A synthetase, chloroplastic/glyoxysomal [Beta vulgaris subsp. vulgaris]}	{sp|B9DGD6|ACS_ARATH; Acetyl-coenzyme A synthetase, chloroplastic/glyoxysomal OS=Arabidopsis thaliana GN=ACS PE=1 SV=1}	{jcu:105630254; K01895 ACSS, acs acetyl-CoA synthetase 6.2.1.1 ko01200; Metabolism; Global and overview maps; Carbon metabolism | ko00010; Metabolism; Carbohydrate metabolism; Glycolysis / gluconeogenesis | ko00620; Metabolism; Carbohydrate metabolism; Pyruvate metabolism | ko00640; Metabolism; Carbohydrate metabolism; Propanoate metabolism | ko00720; Metabolism; Energy metabolism; Carbon fixatio…	{At5g36880; KOG1175 Acyl-CoA synthetase I Lipid transport and metabolism ;}	{GO:0003824; NA GO:0008152; NA}	{XM_010683909.2; PREDICTED: Beta vulgaris subsp. vulgaris acetyl-coenzyme A synthetase, chloroplastic/glyoxysomal (LOC104897088), mRNA}	{PF00501:AMP-binding enzyme}
transcript_HQ_BAB_transcript9423/f2p0/2643	1.1533	9.294e-36	9.6779e-35	{KNA14187.1; hypothetical protein SOVF_109550 [Spinacia oleracea]}	{sp|Q93ZX7|GAUT4_ARATH; Probable galacturonosyltransferase 4 OS=Arabidopsis thaliana GN=GAUT4 PE=2 SV=1}	{fve:101307568; K13648 GAUT alpha-1,4-galacturonosyltransferase 2.4.1.43 ko00520; Metabolism; Carbohydrate metabolism; Amino sugar and nucleotide sugar metabolism}	{NA}	{GO:0005680; anaphase-promoting complex; cellular_component}	{XM_010688296.2; PREDICTED: Beta vulgaris subsp. vulgaris probable galacturonosyltransferase 4 (LOC104900781), mRNA}	{PF12859:Anaphase-promoting complex subunit 1}
transcript_HQ_BAB_transcript9417/f3p0/2640	-0.74031	1.1384e-10	4.8464e-10	{KNA25929.1; hypothetical protein SOVF_002120 [Spinacia oleracea]}	{sp|Q9LE59|GAUT1_ARATH; Polygalacturonate 4-alpha-galacturonosyltransferase OS=Arabidopsis thaliana GN=GAUT1 PE=1 SV=1}	{sly:101268802; K13648 GAUT alpha-1,4-galacturonosyltransferase 2.4.1.43 ko00520; Metabolism; Carbohydrate metabolism; Amino sugar and nucleotide sugar metabolism}	{NA}	{GO:0016757; transferase activity, transferring glycosyl groups; molecular_function}	{XM_010669420.2; PREDICTED: Beta vulgaris subsp. vulgaris polygalacturonate 4-alpha-galacturonosyltransferase (LOC104884733), mRNA}	{PF01501:Glycosyl transferase family 8}
transcript_HQ_BAB_transcript9390/f4p0/2634	-0.47945	4.5264e-15	2.4279e-14	{XP_010682211.1; PREDICTED: acetyl-coenzyme A synthetase, chloroplastic/glyoxysomal [Beta vulgaris subsp. vulgaris]}	{sp|B9DGD6|ACS_ARATH; Acetyl-coenzyme A synthetase, chloroplastic/glyoxysomal OS=Arabidopsis thaliana GN=ACS PE=1 SV=1}	{jcu:105630254; K01895 ACSS, acs acetyl-CoA synthetase 6.2.1.1 ko01200; Metabolism; Global and overview maps; Carbon metabolism | ko00010; Metabolism; Carbohydrate metabolism; Glycolysis / gluconeogenesis | ko00620; Metabolism; Carbohydrate metabolism; Pyruvate metabolism | ko00640; Metabolism; Carbohydrate metabolism; Propanoate metabolism | ko00720; Metabolism; Energy metabolism; Carbon fixatio…	{At5g36880; KOG1175 Acyl-CoA synthetase I Lipid transport and metabolism ;}	{GO:0003824; NA GO:0008152; NA}	{XM_010683909.2; PREDICTED: Beta vulgaris subsp. vulgaris acetyl-coenzyme A synthetase, chloroplastic/glyoxysomal (LOC104897088), mRNA}	{PF00501:AMP-binding enzyme}
transcript_HQ_BAB_transcript9295/f3p0/2656	-0.65488	3.1391e-07	1.0494e-06	{KNA18592.1; hypothetical protein SOVF_069220 [Spinacia oleracea]}	{sp|Q9M9Y5|GAUT6_ARATH; Probable galacturonosyltransferase 6 OS=Arabidopsis thaliana GN=GAUT6 PE=2 SV=1}	{bvg:104894598; K13648 GAUT alpha-1,4-galacturonosyltransferase 2.4.1.43 ko00520; Metabolism; Carbohydrate metabolism; Amino sugar and nucleotide sugar metabolism}	{NA}	{GO:0016757; transferase activity, transferring glycosyl groups; molecular_function}	{XM_010680871.2; PREDICTED: Beta vulgaris subsp. vulgaris probable galacturonosyltransferase 6 (LOC104894598), mRNA}	{PF01501:Glycosyl transferase family 8}
transcript_HQ_BAB_transcript9180/f2p0/2677	0.66831	0.000748	0.0017457	{XP_010689639.1; PREDICTED: probable galacturonosyltransferase 10 isoform X1 [Beta vulgaris subsp. vulgaris]}	{sp|Q9SKT6|GAUTA_ARATH; Probable galacturonosyltransferase 10 OS=Arabidopsis thaliana GN=GAUT10 PE=2 SV=2}	{vvi:100244741; K13648 GAUT alpha-1,4-galacturonosyltransferase 2.4.1.43 ko00520; Metabolism; Carbohydrate metabolism; Amino sugar and nucleotide sugar metabolism}	{NA}	{GO:0016757; transferase activity, transferring glycosyl groups; molecular_function}	{XM_010691337.2; PREDICTED: Beta vulgaris subsp. vulgaris probable galacturonosyltransferase 10 (LOC104903322), transcript variant X1, mRNA}	{PF01501:Glycosyl transferase family 8}
transcript_HQ_BAB_transcript912/f2p0/4448	0.8651	0.00017592	0.00044375	{XP_010670485.1; PREDICTED: uncharacterized protein LOC104887530 isoform X1 [Beta vulgaris subsp. vulgaris]}	{sp|Q8D4H3|BGAL_VIBVU; Beta-galactosidase OS=Vibrio vulnificus (strain CMCP6) GN=lacZ PE=3 SV=2}	{bvg:104887530; K01190 lacZ beta-galactosidase 3.2.1.23 ko00052; Metabolism; Carbohydrate metabolism; galactose metabolism | ko00600; Metabolism; Lipid metabolism; Sphingolipid metabolism | ko00511; Metabolism; Glycan biosynthesis and metabolism; Other glycan degradation}	{7302519; KOG2024 Beta-Glucuronidase GUSB (glycosylhydrolase superfamily 2) G Carbohydrate transport and metabolism ;}	{GO:0005975; carbohydrate metabolic process; biological_process GO:0004565; beta-galactosidase activity; molecular_function GO:0009341; beta-galactosidase complex; cellular_component GO:0004553; hydrolase activity, hydrolyzing O-glycosyl compounds; molecular_function}	{XM_010672183.2; PREDICTED: Beta vulgaris subsp. vulgaris beta-galactosidase (LOC104887530), transcript variant X1, mRNA}	{PF02836:Glycosyl hydrolases family 2, TIM barrel domain PF00703:Glycosyl hydrolases family 2 PF02837:Glycosyl hydrolases family 2, sugar binding domain PF02929:Beta galactosidase small chain}
transcript_HQ_BAB_transcript9118/f6p0/2649	0.12329	0.02271	0.041441	{KNA17728.1; hypothetical protein SOVF_077450 [Spinacia oleracea]}	{sp|O20250|TKTC_SPIOL; Transketolase, chloroplastic OS=Spinacia oleracea PE=1 SV=1}	{bvg:104888662; K00615 E2.2.1.1, tktA, tktB transketolase 2.2.1.1 ko01200; Metabolism; Global and overview maps; Carbon metabolism | ko01230; Metabolism; Global and overview maps; Biosynthesis of amino acids | ko00030; Metabolism; Carbohydrate metabolism; pentose phosphate pathway | ko00710; Metabolism; Energy metabolism; Carbon fixation in photosynthetic organisms | ko01051; Metabolism; Metaboli…	{At3g60750; KOG0523 Transketolase G Carbohydrate transport and metabolism ;}	{GO:0016624; oxidoreductase activity, acting on the aldehyde or oxo group of donors, disulfide as acceptor; molecular_function GO:0008152; NA}	{XM_010673689.2; PREDICTED: Beta vulgaris subsp. vulgaris transketolase, chloroplastic (LOC104888662), mRNA}	{PF00676:Dehydrogenase E1 component}
transcript_HQ_BAB_transcript9064/f3p0/2712	1.3065	3.3987e-93	9.0212e-92	{XP_010671991.1; PREDICTED: transketolase, chloroplastic [Beta vulgaris subsp. vulgaris]}	{sp|O20250|TKTC_SPIOL; Transketolase, chloroplastic OS=Spinacia oleracea PE=1 SV=1}	{bvg:104888662; K00615 E2.2.1.1, tktA, tktB transketolase 2.2.1.1 ko01200; Metabolism; Global and overview maps; Carbon metabolism | ko01230; Metabolism; Global and overview maps; Biosynthesis of amino acids | ko00030; Metabolism; Carbohydrate metabolism; pentose phosphate pathway | ko00710; Metabolism; Energy metabolism; Carbon fixation in photosynthetic organisms | ko01051; Metabolism; Metaboli…	{At3g60750; KOG0523 Transketolase G Carbohydrate transport and metabolism ;}	{GO:0016624; oxidoreductase activity, acting on the aldehyde or oxo group of donors, disulfide as acceptor; molecular_function GO:0008152; NA}	{XM_010673689.2; PREDICTED: Beta vulgaris subsp. vulgaris transketolase, chloroplastic (LOC104888662), mRNA}	{PF00676:Dehydrogenase E1 component}
transcript_HQ_BAB_transcript8870/f4p0/2734	-2.262	0	7.3286e-307	{XP_010671991.1; PREDICTED: transketolase, chloroplastic [Beta vulgaris subsp. vulgaris]}	{sp|O20250|TKTC_SPIOL; Transketolase, chloroplastic OS=Spinacia oleracea PE=1 SV=1}	{bvg:104888662; K00615 E2.2.1.1, tktA, tktB transketolase 2.2.1.1 ko01200; Metabolism; Global and overview maps; Carbon metabolism | ko01230; Metabolism; Global and overview maps; Biosynthesis of amino acids | ko00030; Metabolism; Carbohydrate metabolism; pentose phosphate pathway | ko00710; Metabolism; Energy metabolism; Carbon fixation in photosynthetic organisms | ko01051; Metabolism; Metaboli…	{At3g60750; KOG0523 Transketolase G Carbohydrate transport and metabolism ;}	{GO:0008152; NA GO:0016624; oxidoreductase activity, acting on the aldehyde or oxo group of donors, disulfide as acceptor; molecular_function}	{XM_010673689.2; PREDICTED: Beta vulgaris subsp. vulgaris transketolase, chloroplastic (LOC104888662), mRNA}	{PF00676:Dehydrogenase E1 component}
transcript_HQ_BAB_transcript8866/f3p0/2703	-0.53171	9.5121e-09	3.5495e-08	{KNA25764.1; hypothetical protein SOVF_003910 [Spinacia oleracea]}	{sp|Q9LIS3|GAE6_ARATH; UDP-glucuronate 4-epimerase 6 OS=Arabidopsis thaliana GN=GAE6 PE=1 SV=1}	{bvg:104889782; K08679 E5.1.3.6 UDP-glucuronate 4-epimerase 5.1.3.6 ko00520; Metabolism; Carbohydrate metabolism; Amino sugar and nucleotide sugar metabolism}	{At3g23820; KOG1371 UDP-glucose 4-epimerase/UDP-sulfoquinovose synthase M Cell wall/membrane/envelope biogenesis ;}	{GO:0003824; NA GO:0055114; oxidation-reduction process; biological_process GO:0003854; 3-beta-hydroxy-delta5-steroid dehydrogenase activity; molecular_function GO:0006694; steroid biosynthetic process; biological_process GO:0050662; coenzyme binding; molecular_function GO:0016616; oxidoreductase activity, acting on the CH-OH group of donors, NAD or NADP as acceptor; molecular_function}	{XM_010675087.2; PREDICTED: Beta vulgaris subsp. vulgaris UDP-glucuronate 4-epimerase 6 (LOC104889782), mRNA}	{PF01370:NAD dependent epimerase/dehydratase family PF01073:3-beta hydroxysteroid dehydrogenase/isomerase family}
transcript_HQ_BAB_transcript8857/f2p0/2713	0.34956	5.9383e-12	2.711e-11	{XP_010672299.1; PREDICTED: acidic endochitinase SP2 [Beta vulgaris subsp. vulgaris]}	{sp|P42820|CHIP_BETVU; Acidic endochitinase SP2 OS=Beta vulgaris GN=SP2 PE=1 SV=1}	{bvg:104888888; K01183 E3.2.1.14 chitinase 3.2.1.14 ko00520; Metabolism; Carbohydrate metabolism; Amino sugar and nucleotide sugar metabolism}	{At3g55200; KOG1898 Splicing factor 3b, subunit 3 A RNA processing and modification ;}	{GO:0004568; chitinase activity; molecular_function GO:0006032; chitin catabolic process; biological_process GO:0008061; chitin binding; molecular_function GO:0016998; cell wall macromolecule catabolic process; biological_process}	{XM_011028792.1; PREDICTED: Populus euphratica splicing factor 3B subunit 3-like (LOC105127474), transcript variant X2, mRNA}	{PF00187:Chitin recognition protein PF00182:Chitinase class I}
transcript_HQ_BAB_transcript8748/f2p0/2727	0.3511	0.0011993	0.0027218	{KNA07832.1; hypothetical protein SOVF_168170 [Spinacia oleracea]}	{sp|O24301|SUS2_PEA; Sucrose synthase 2 OS=Pisum sativum GN=SUS2 PE=2 SV=1}	{lja:Lj0g3v0242009.1; K00695 E2.4.1.13 sucrose synthase 2.4.1.13 ko00500; Metabolism; Carbohydrate metabolism; Starch and sucrose metabolism}	{At4g02280; KOG0853 Glycosyltransferase M Cell wall/membrane/envelope biogenesis ;}	{GO:0005985; sucrose metabolic process; biological_process GO:0016157; sucrose synthase activity; molecular_function}	{XM_010686041.2; PREDICTED: Beta vulgaris subsp. vulgaris sucrose synthase (SBSS1), mRNA}	{PF00862:Sucrose synthase}
transcript_HQ_BAB_transcript8718/f2p0/2743	1.2846	1.3518e-16	7.7441e-16	{KNA25764.1; hypothetical protein SOVF_003910 [Spinacia oleracea]}	{sp|Q9LIS3|GAE6_ARATH; UDP-glucuronate 4-epimerase 6 OS=Arabidopsis thaliana GN=GAE6 PE=1 SV=1}	{bvg:104889782; K08679 E5.1.3.6 UDP-glucuronate 4-epimerase 5.1.3.6 ko00520; Metabolism; Carbohydrate metabolism; Amino sugar and nucleotide sugar metabolism}	{At3g23820; KOG1371 UDP-glucose 4-epimerase/UDP-sulfoquinovose synthase M Cell wall/membrane/envelope biogenesis ;}	{GO:0055114; oxidation-reduction process; biological_process GO:0003854; 3-beta-hydroxy-delta5-steroid dehydrogenase activity; molecular_function GO:0050662; coenzyme binding; molecular_function GO:0016616; oxidoreductase activity, acting on the CH-OH group of donors, NAD or NADP as acceptor; molecular_function GO:0003824; NA GO:0008168; methyltransferase activity; molecular_function GO:0006694; …	{XM_010675087.2; PREDICTED: Beta vulgaris subsp. vulgaris UDP-glucuronate 4-epimerase 6 (LOC104889782), mRNA}	{PF01073:3-beta hydroxysteroid dehydrogenase/isomerase family PF01370:NAD dependent epimerase/dehydratase family PF08241:Methyltransferase domain}
transcript_HQ_BAB_transcript8557/f2p0/2738	1.0265	0.00056876	0.0013469	{KNA17622.1; hypothetical protein SOVF_078440 [Spinacia oleracea]}	{sp|O80831|BAM7_ARATH; Beta-amylase 7 OS=Arabidopsis thaliana GN=BAM7 PE=2 SV=2}	{bvg:104887495; K01177 E3.2.1.2 Beta-amylase 3.2.1.2 ko00500; Metabolism; Carbohydrate metabolism; Starch and sucrose metabolism}	{NA}	{GO:0016161; Beta-amylase activity; molecular_function GO:0000272; polysaccharide catabolic process; biological_process}	{XM_010672134.2; PREDICTED: Beta vulgaris subsp. vulgaris Beta-amylase 7 (LOC104887495), transcript variant X1, mRNA}	{PF01373:Glycosyl hydrolase family 14}
transcript_HQ_BAB_transcript8020/f2p0/2813	0.66313	5.7915e-25	4.497e-24	{KNA19235.1; hypothetical protein SOVF_063380 [Spinacia oleracea]}	{sp|Q43848|TKTC_SOLTU; Transketolase, chloroplastic OS=Solanum tuberosum PE=2 SV=1}	{nnu:104611478; K00615 E2.2.1.1, tktA, tktB transketolase 2.2.1.1 ko01200; Metabolism; Global and overview maps; Carbon metabolism | ko01230; Metabolism; Global and overview maps; Biosynthesis of amino acids | ko00030; Metabolism; Carbohydrate metabolism; pentose phosphate pathway | ko00710; Metabolism; Energy metabolism; Carbon fixation in photosynthetic organisms | ko01051; Metabolism; Metaboli…	{At2g45290; KOG0523 Transketolase G Carbohydrate transport and metabolism ;}	{GO:0030976; thiamine pyrophosphate binding; molecular_function GO:0016624; oxidoreductase activity, acting on the aldehyde or oxo group of donors, disulfide as acceptor; molecular_function GO:0008152; NA GO:0016832; aldehyde-lyase activity; molecular_function GO:0003824; NA GO:0005975; carbohydrate metabolic process; biological_process}	{XM_010694658.2; PREDICTED: Beta vulgaris subsp. vulgaris transketolase, chloroplastic (LOC104905987), mRNA}	{PF00676:Dehydrogenase E1 component PF02775:Thiamine pyrophosphate enzyme, C-terminal TPP binding domain PF09363:XFP C-terminal domain}
transcript_HQ_BAB_transcript7724/f2p0/2867	-3.2321	2.715e-82	6.2966e-81	{XP_010667722.1; PREDICTED: polygalacturonate 4-alpha-galacturonosyltransferase [Beta vulgaris subsp. vulgaris]}	{sp|Q9LE59|GAUT1_ARATH; Polygalacturonate 4-alpha-galacturonosyltransferase OS=Arabidopsis thaliana GN=GAUT1 PE=1 SV=1}	{sly:101268802; K13648 GAUT alpha-1,4-galacturonosyltransferase 2.4.1.43 ko00520; Metabolism; Carbohydrate metabolism; Amino sugar and nucleotide sugar metabolism}	{NA}	{GO:0016757; transferase activity, transferring glycosyl groups; molecular_function}	{XM_010669420.2; PREDICTED: Beta vulgaris subsp. vulgaris polygalacturonate 4-alpha-galacturonosyltransferase (LOC104884733), mRNA}	{PF01501:Glycosyl transferase family 8}
transcript_HQ_BAB_transcript7567/f2p0/2880	-0.38397	0.0087616	0.017361	{AFS17277.1; sucrose synthase 1 [Amaranthus cruentus/Amaranthus hypocondriacus mixed library]}	{sp|P13708|SUSY_SOYBN; Sucrose synthase OS=Glycine max GN=SS PE=1 SV=2}	{adu:107496082; K00695 E2.4.1.13 sucrose synthase 2.4.1.13 ko00500; Metabolism; Carbohydrate metabolism; Starch and sucrose metabolism}	{At3g43190; KOG0853 Glycosyltransferase M Cell wall/membrane/envelope biogenesis ;}	{GO:0016157; sucrose synthase activity; molecular_function GO:0005985; sucrose metabolic process; biological_process}	{X82504.1; C.rubrum mRNA for sucrose synthase}	{PF00862:Sucrose synthase}
transcript_HQ_BAB_transcript7535/f5p0/2851	-2.0416	3.531e-19	2.2477e-18	{KNA25929.1; hypothetical protein SOVF_002120 [Spinacia oleracea]}	{sp|Q9LE59|GAUT1_ARATH; Polygalacturonate 4-alpha-galacturonosyltransferase OS=Arabidopsis thaliana GN=GAUT1 PE=1 SV=1}	{sly:101268802; K13648 GAUT alpha-1,4-galacturonosyltransferase 2.4.1.43 ko00520; Metabolism; Carbohydrate metabolism; Amino sugar and nucleotide sugar metabolism}	{NA}	{GO:0016757; transferase activity, transferring glycosyl groups; molecular_function}	{XM_010669420.2; PREDICTED: Beta vulgaris subsp. vulgaris polygalacturonate 4-alpha-galacturonosyltransferase (LOC104884733), mRNA}	{PF01501:Glycosyl transferase family 8}
transcript_HQ_BAB_transcript7392/f7p0/2876	2.7964	1.4333e-54	2.1818e-53	{AFS17277.1; sucrose synthase 1 [Amaranthus cruentus/Amaranthus hypocondriacus mixed library]}	{sp|P13708|SUSY_SOYBN; Sucrose synthase OS=Glycine max GN=SS PE=1 SV=2}	{adu:107496082; K00695 E2.4.1.13 sucrose synthase 2.4.1.13 ko00500; Metabolism; Carbohydrate metabolism; Starch and sucrose metabolism}	{At3g43190; KOG0853 Glycosyltransferase M Cell wall/membrane/envelope biogenesis ;}	{GO:0005985; sucrose metabolic process; biological_process GO:0016157; sucrose synthase activity; molecular_function}	{X82504.1; C.rubrum mRNA for sucrose synthase}	{PF00862:Sucrose synthase}
transcript_HQ_BAB_transcript7208/f8p0/2918	0.21504	0.019977	0.036852	{XP_010692551.1; PREDICTED: 1,4-alpha-glucan-branching enzyme 1, chloroplastic/amyloplastic [Beta vulgaris subsp. vulgaris]}	{sp|Q41059|GLGB2_PEA; 1,4-alpha-glucan-branching enzyme 1, chloroplastic/amyloplastic (Fragment) OS=Pisum sativum GN=SBEII PE=1 SV=1}	{gmx:100792499; K00700 GBE1, glgB 1,4-alpha-glucan branching enzyme 2.4.1.18 ko00500; Metabolism; Carbohydrate metabolism; Starch and sucrose metabolism}	{At2g36390; KOG0470 1,4-alpha-glucan branching enzyme/starch branching enzyme II G Carbohydrate transport and metabolism ;}	{GO:0043169; cation binding; molecular_function GO:0005975; carbohydrate metabolic process; biological_process GO:0003824; NA GO:0004553; hydrolase activity, hydrolyzing O-glycosyl compounds; molecular_function}	{XM_010694249.2; PREDICTED: Beta vulgaris subsp. vulgaris 1,4-alpha-glucan-branching enzyme 1, chloroplastic/amyloplastic (LOC104905653), mRNA}	{PF02922:Carbohydrate-binding module 48 (Isoamylase N-terminal domain) PF00128:Alpha amylase, catalytic domain PF02806:Alpha amylase, C-terminal all-beta domain}
transcript_HQ_BAB_transcript7013/f5p0/2928	-1.4144	1.6102e-95	4.4241e-94	{XP_010684945.1; PREDICTED: probable pectate lyase 4 [Beta vulgaris subsp. vulgaris]}	{sp|Q9C8G4|PLY4_ARATH; Probable pectate lyase 4 OS=Arabidopsis thaliana GN=At1g30350 PE=2 SV=1}	{jcu:105636240; K01728 pel pectate lyase 4.2.2.2 ko00040; Metabolism; Carbohydrate metabolism; Pentose and glucuronate interconversions | ko02024; Cellular Processes; Cellular community - prokaryotes; Quorum sensing}	{NA}	{NA}	{XM_010686643.2; PREDICTED: Beta vulgaris subsp. vulgaris probable pectate lyase 4 (LOC104899447), mRNA}	{NA}
transcript_HQ_BAB_transcript6812/f2p0/2991	2.6522	1.0302e-07	3.5883e-07	{XP_010682211.1; PREDICTED: acetyl-coenzyme A synthetase, chloroplastic/glyoxysomal [Beta vulgaris subsp. vulgaris]}	{sp|B9DGD6|ACS_ARATH; Acetyl-coenzyme A synthetase, chloroplastic/glyoxysomal OS=Arabidopsis thaliana GN=ACS PE=1 SV=1}	{cit:102615660; K01895 ACSS, acs acetyl-CoA synthetase 6.2.1.1 ko01200; Metabolism; Global and overview maps; Carbon metabolism | ko00010; Metabolism; Carbohydrate metabolism; Glycolysis / gluconeogenesis | ko00620; Metabolism; Carbohydrate metabolism; Pyruvate metabolism | ko00640; Metabolism; Carbohydrate metabolism; Propanoate metabolism | ko00720; Metabolism; Energy metabolism; Carbon fixatio…	{At5g36880; KOG1175 Acyl-CoA synthetase I Lipid transport and metabolism ;}	{GO:0003824; NA GO:0008152; NA}	{XM_010683909.2; PREDICTED: Beta vulgaris subsp. vulgaris acetyl-coenzyme A synthetase, chloroplastic/glyoxysomal (LOC104897088), mRNA}	{PF00501:AMP-binding enzyme}
transcript_HQ_BAB_transcript6592/f2p0/3038	-1.7904	0	0	{XP_010680522.1; PREDICTED: galactinol--sucrose galactosyltransferase [Beta vulgaris subsp. vulgaris]}	{sp|Q8VWN6|RFS_PEA; Galactinol--sucrose galactosyltransferase OS=Pisum sativum GN=RFS PE=1 SV=1}	{bvg:104895650; K06617 E2.4.1.82 Raffinose synthase 2.4.1.82 ko00052; Metabolism; Carbohydrate metabolism; galactose metabolism}	{NA}	{NA}	{XM_010682220.2; PREDICTED: Beta vulgaris subsp. vulgaris galactinol--sucrose galactosyltransferase (LOC104895650), mRNA}	{NA}
transcript_HQ_BAB_transcript6535/f2p0/3042	-2.2026	9.3076e-48	1.2525e-46	{XP_010684343.1; PREDICTED: sucrose synthase [Beta vulgaris subsp. vulgaris]}	{sp|Q42652|SUSY_BETVU; Sucrose synthase (Fragment) OS=Beta vulgaris GN=SS1 PE=2 SV=1}	{cam:101490898; K00695 E2.4.1.13 sucrose synthase 2.4.1.13 ko00500; Metabolism; Carbohydrate metabolism; Starch and sucrose metabolism}	{At4g02280; KOG0853 Glycosyltransferase M Cell wall/membrane/envelope biogenesis ;}	{GO:0006520; cellular amino acid metabolic process; biological_process GO:0016743; carboxyl- or carbamoyltransferase activity; molecular_function GO:0016597; amino acid binding; molecular_function GO:0005985; sucrose metabolic process; biological_process GO:0016157; sucrose synthase activity; molecular_function}	{XM_010686041.2; PREDICTED: Beta vulgaris subsp. vulgaris sucrose synthase (SBSS1), mRNA}	{PF00862:Sucrose synthase PF00185:Aspartate/ornithine carbamoyltransferase, Asp/Orn binding domain}
transcript_HQ_BAB_transcript6320/f2p0/3081	1.4239	6.8819e-14	3.4893e-13	{KNA20125.1; hypothetical protein SOVF_055250 [Spinacia oleracea]}	{sp|O23617|TPS5_ARATH; Alpha,alpha-trehalose-phosphate synthase [UDP-forming] 5 OS=Arabidopsis thaliana GN=TPS5 PE=1 SV=2}	{bvg:104893000; K16055 TPS trehalose 6-phosphate synthase/phosphatase [EC:2.4.1.15 3.1.3.12] 2.4.1.15,3.1.3.12 ko00500; Metabolism; Carbohydrate metabolism; Starch and sucrose metabolism}	{At4g17770; KOG1050 Trehalose-6-phosphate synthase component TPS1 and related subunits G Carbohydrate transport and metabolism ;}	{GO:0003824; NA GO:0005992; trehalose biosynthetic process; biological_process}	{XM_010679030.2; PREDICTED: Beta vulgaris subsp. vulgaris alpha,alpha-trehalose-phosphate synthase [UDP-forming] 5 (LOC104893000), transcript variant X2, mRNA}	{PF00982:Glycosyltransferase family 20 PF02358:Trehalose-phosphatase}
transcript_HQ_BAB_transcript6240/f2p0/3088	0.39339	0.00016322	0.00041329	{XP_010682587.1; PREDICTED: probable alpha,alpha-trehalose-phosphate synthase [UDP-forming] 9 [Beta vulgaris subsp. vulgaris]}	{sp|Q9LRA7|TPS9_ARATH; Probable alpha,alpha-trehalose-phosphate synthase [UDP-forming] 9 OS=Arabidopsis thaliana GN=TPS9 PE=2 SV=1}	{mdm:103451948; K16055 TPS trehalose 6-phosphate synthase/phosphatase [EC:2.4.1.15 3.1.3.12] 2.4.1.15,3.1.3.12 ko00500; Metabolism; Carbohydrate metabolism; Starch and sucrose metabolism}	{At1g23870; KOG1050 Trehalose-6-phosphate synthase component TPS1 and related subunits G Carbohydrate transport and metabolism ;}	{GO:0005992; trehalose biosynthetic process; biological_process GO:0003824; NA}	{XM_019250418.1; PREDICTED: Beta vulgaris subsp. vulgaris probable alpha,alpha-trehalose-phosphate synthase [UDP-forming] 9 (LOC104897415), transcript variant X2, mRNA}	{PF00982:Glycosyltransferase family 20 PF02358:Trehalose-phosphatase}
transcript_HQ_BAB_transcript6196/f2p0/3068	-2.1663	0	0	{XP_010684945.1; PREDICTED: probable pectate lyase 4 [Beta vulgaris subsp. vulgaris]}	{sp|Q9C8G4|PLY4_ARATH; Probable pectate lyase 4 OS=Arabidopsis thaliana GN=At1g30350 PE=2 SV=1}	{jcu:105636240; K01728 pel pectate lyase 4.2.2.2 ko00040; Metabolism; Carbohydrate metabolism; Pentose and glucuronate interconversions | ko02024; Cellular Processes; Cellular community - prokaryotes; Quorum sensing}	{NA}	{NA}	{XM_010686643.2; PREDICTED: Beta vulgaris subsp. vulgaris probable pectate lyase 4 (LOC104899447), mRNA}	{NA}
transcript_HQ_BAB_transcript5933/f2p0/3135	-5.7496	1.3022e-97	3.6538e-96	{XP_010671592.1; PREDICTED: alpha-glucosidase [Beta vulgaris subsp. vulgaris]}	{sp|O04893|AGLU_SPIOL; Alpha-glucosidase OS=Spinacia oleracea PE=1 SV=1}	{bvg:104888352; K01187 malZ alpha-glucosidase 3.2.1.20 ko00052; Metabolism; Carbohydrate metabolism; Galactose metabolism | ko00500; Metabolism; Carbohydrate metabolism; Starch and sucrose metabolism}	{At5g11720; KOG1065 Maltase glucoamylase and related hydrolases, glycosyl hydrolase family 31 G Carbohydrate transport and metabolism ;}	{GO:0005975; carbohydrate metabolic process; biological_process GO:0004553; hydrolase activity, hydrolyzing O-glycosyl compounds; molecular_function}	{XM_010673290.2; PREDICTED: Beta vulgaris subsp. vulgaris alpha-glucosidase (LOC104888352), mRNA}	{PF01055:Glycosyl hydrolases family 31 }
transcript_HQ_BAB_transcript5847/f2p0/3137	0.93221	1.1567e-45	1.4911e-44	{XP_010685628.1; PREDICTED: alpha-glucan phosphorylase, H isozyme [Beta vulgaris subsp. vulgaris]}	{sp|P32811|PHSH_SOLTU; Alpha-glucan phosphorylase, H isozyme OS=Solanum tuberosum PE=1 SV=1}	{mdm:103447449; K00688 PYG, glgP glycogen phosphorylase 2.4.1.1 ko00500; Metabolism; Carbohydrate metabolism; Starch and sucrose metabolism | ko02026; Cellular Processes; Cellular community - prokaryotes; Biofilm formation - Escherichia coli | ko04910; Organismal Systems; Endocrine system; Insulin signaling pathway | ko04922; Organismal Systems; Endocrine system; Glucagon signaling pathway | ko04…	{At3g46970; KOG2099 Glycogen phosphorylase G Carbohydrate transport and metabolism ;}	{GO:0005975; carbohydrate metabolic process; biological_process GO:0008184; glycogen phosphorylase activity; molecular_function}	{XM_010687326.2; PREDICTED: Beta vulgaris subsp. vulgaris alpha-glucan phosphorylase, H isozyme (LOC104900011), mRNA}	{PF00343:Carbohydrate phosphorylase}
transcript_HQ_BAB_transcript5833/f4p0/3145	0.28193	1.3303e-05	3.826e-05	{XP_018812523.1; PREDICTED: probable alpha,alpha-trehalose-phosphate synthase [UDP-forming] 7 [Juglans regia]}	{sp|Q9LMI0|TPS7_ARATH; Probable alpha,alpha-trehalose-phosphate synthase [UDP-forming] 7 OS=Arabidopsis thaliana GN=TPS7 PE=1 SV=1}	{cit:102626436; K16055 TPS trehalose 6-phosphate synthase/phosphatase [EC:2.4.1.15 3.1.3.12] 2.4.1.15,3.1.3.12 ko00500; Metabolism; Carbohydrate metabolism; Starch and sucrose metabolism}	{At1g06410; KOG1050 Trehalose-6-phosphate synthase component TPS1 and related subunits G Carbohydrate transport and metabolism ;}	{GO:0003824; NA GO:0005992; trehalose biosynthetic process; biological_process}	{XM_015527009.1; PREDICTED: Citrus sinensis probable alpha,alpha-trehalose-phosphate synthase [UDP-forming] 7 (LOC102626436), transcript variant X2, mRNA}	{PF02358:Trehalose-phosphatase PF00982:Glycosyltransferase family 20}
transcript_HQ_BAB_transcript5797/f9p0/3061	-0.63305	3.8468e-09	1.4791e-08	{XP_010684343.1; PREDICTED: sucrose synthase [Beta vulgaris subsp. vulgaris]}	{sp|Q42652|SUSY_BETVU; Sucrose synthase (Fragment) OS=Beta vulgaris GN=SS1 PE=2 SV=1}	{cam:101490898; K00695 E2.4.1.13 sucrose synthase 2.4.1.13 ko00500; Metabolism; Carbohydrate metabolism; Starch and sucrose metabolism}	{At4g02280; KOG0853 Glycosyltransferase M Cell wall/membrane/envelope biogenesis ;}	{GO:0006520; cellular amino acid metabolic process; biological_process GO:0016743; carboxyl- or carbamoyltransferase activity; molecular_function GO:0005985; sucrose metabolic process; biological_process GO:0016157; sucrose synthase activity; molecular_function GO:0016597; amino acid binding; molecular_function}	{XM_010686041.2; PREDICTED: Beta vulgaris subsp. vulgaris sucrose synthase (SBSS1), mRNA}	{PF00862:Sucrose synthase PF00185:Aspartate/ornithine carbamoyltransferase, Asp/Orn binding domain}
transcript_HQ_BAB_transcript5757/f4p0/3125	1.0849	1.1072e-64	1.9824e-63	{XP_010685628.1; PREDICTED: alpha-glucan phosphorylase, H isozyme [Beta vulgaris subsp. vulgaris]}	{sp|P32811|PHSH_SOLTU; Alpha-glucan phosphorylase, H isozyme OS=Solanum tuberosum PE=1 SV=1}	{mdm:103447449; K00688 PYG, glgP glycogen phosphorylase 2.4.1.1 ko00500; Metabolism; Carbohydrate metabolism; Starch and sucrose metabolism | ko02026; Cellular Processes; Cellular community - prokaryotes; Biofilm formation - Escherichia coli | ko04910; Organismal Systems; Endocrine system; Insulin signaling pathway | ko04922; Organismal Systems; Endocrine system; Glucagon signaling pathway | ko04…	{At3g46970; KOG2099 Glycogen phosphorylase G Carbohydrate transport and metabolism ;}	{GO:0005975; carbohydrate metabolic process; biological_process GO:0008184; glycogen phosphorylase activity; molecular_function}	{XM_010687326.2; PREDICTED: Beta vulgaris subsp. vulgaris alpha-glucan phosphorylase, H isozyme (LOC104900011), mRNA}	{PF00343:Carbohydrate phosphorylase}
transcript_HQ_BAB_transcript5553/f4p0/3139	Inf	6.7709e-263	5.9855e-261	{XP_010671592.1; PREDICTED: alpha-glucosidase [Beta vulgaris subsp. vulgaris]}	{sp|O04893|AGLU_SPIOL; Alpha-glucosidase OS=Spinacia oleracea PE=1 SV=1}	{bvg:104888352; K01187 malZ alpha-glucosidase 3.2.1.20 ko00052; Metabolism; Carbohydrate metabolism; galactose metabolism | ko00500; Metabolism; Carbohydrate metabolism; Starch and sucrose metabolism}	{At5g11720; KOG1065 Maltase glucoamylase and related hydrolases, glycosyl hydrolase family 31 G Carbohydrate transport and metabolism ;}	{GO:0005975; carbohydrate metabolic process; biological_process GO:0004553; hydrolase activity, hydrolyzing O-glycosyl compounds; molecular_function}	{XM_010673290.2; PREDICTED: Beta vulgaris subsp. vulgaris alpha-glucosidase (LOC104888352), mRNA}	{PF01055:Glycosyl hydrolases family 31 }
transcript_HQ_BAB_transcript5440/f5p0/3166	-2.749	1.3997e-154	6.2258e-153	{XP_010671592.1; PREDICTED: alpha-glucosidase [Beta vulgaris subsp. vulgaris]}	{sp|O04893|AGLU_SPIOL; Alpha-glucosidase OS=Spinacia oleracea PE=1 SV=1}	{bvg:104888352; K01187 malZ alpha-glucosidase 3.2.1.20 ko00052; Metabolism; Carbohydrate metabolism; Galactose metabolism | ko00500; Metabolism; Carbohydrate metabolism; Starch and sucrose metabolism}	{At5g11720; KOG1065 Maltase glucoamylase and related hydrolases, glycosyl hydrolase family 31 G Carbohydrate transport and metabolism ;}	{GO:0005975; carbohydrate metabolic process; biological_process GO:0004553; hydrolase activity, hydrolyzing O-glycosyl compounds; molecular_function}	{XM_010673290.2; PREDICTED: Beta vulgaris subsp. vulgaris alpha-glucosidase (LOC104888352), mRNA}	{PF01055:Glycosyl hydrolases family 31 }
transcript_HQ_BAB_transcript5186/f5p0/3208	1.2995	2.0795e-10	8.6742e-10	{XP_010695328.1; PREDICTED: isoamylase 2, chloroplastic [Beta vulgaris subsp. vulgaris]}	{sp|Q8L735|ISOA2_ARATH; Isoamylase 2, chloroplastic OS=Arabidopsis thaliana GN=ISA2 PE=1 SV=2}	{pper:PRUPE_ppa001199mg; K01214 ISA, treX isoamylase 3.2.1.68 ko00500; Metabolism; Carbohydrate metabolism; Starch and sucrose metabolism}	{At1g03310; KOG0470 1,4-alpha-glucan branching enzyme/starch branching enzyme II G Carbohydrate transport and metabolism ;}	{GO:0005975; carbohydrate metabolic process; biological_process GO:0003824; NA GO:0004553; hydrolase activity, hydrolyzing O-glycosyl compounds; molecular_function}	{XM_010697029.2; PREDICTED: Beta vulgaris subsp. vulgaris isoamylase 2, chloroplastic (LOC104907991), transcript variant X2, mRNA}	{PF00128:Alpha amylase, catalytic domain PF02922:Carbohydrate-binding module 48 (Isoamylase N-terminal domain)}
transcript_HQ_BAB_transcript5078/f4p0/3246	-1.6117	2.0576e-27	1.7088e-26	{XP_010678736.1; PREDICTED: probable alpha,alpha-trehalose-phosphate synthase [UDP-forming] 9 [Beta vulgaris subsp. vulgaris]}	{sp|O80738|TPS10_ARATH; Probable alpha,alpha-trehalose-phosphate synthase [UDP-forming] 10 OS=Arabidopsis thaliana GN=TPS10 PE=2 SV=1}	{bvg:104894247; K16055 TPS trehalose 6-phosphate synthase/phosphatase [EC:2.4.1.15 3.1.3.12] 2.4.1.15,3.1.3.12 ko00500; Metabolism; Carbohydrate metabolism; Starch and sucrose metabolism}	{At1g60140; KOG1050 Trehalose-6-phosphate synthase component TPS1 and related subunits G Carbohydrate transport and metabolism ;}	{GO:0005992; trehalose biosynthetic process; biological_process GO:0003824; NA}	{XM_010680434.2; PREDICTED: Beta vulgaris subsp. vulgaris probable alpha,alpha-trehalose-phosphate synthase [UDP-forming] 9 (LOC104894247), mRNA}	{PF02358:Trehalose-phosphatase PF00982:Glycosyltransferase family 20}
transcript_HQ_BAB_transcript4693/f2p0/3357	0.20577	0.0041034	0.0085882	{XP_010680730.1; PREDICTED: alpha-1,4 glucan phosphorylase L-2 isozyme, chloroplastic/amyloplastic isoform X1 [Beta vulgaris subsp. vulgaris]}	{sp|P53535|PHSL2_SOLTU; Alpha-1,4 glucan phosphorylase L-2 isozyme, chloroplastic/amyloplastic OS=Solanum tuberosum GN=STP-1 PE=1 SV=1}	{vvi:100257811; K00688 PYG, glgP glycogen phosphorylase 2.4.1.1 ko00500; Metabolism; Carbohydrate metabolism; Starch and sucrose metabolism | ko02026; Cellular Processes; Cellular community - prokaryotes; Biofilm formation - Escherichia coli | ko04910; Organismal Systems; Endocrine system; Insulin signaling pathway | ko04922; Organismal Systems; Endocrine system; Glucagon signaling pathway | ko04…	{At3g29320; KOG2099 Glycogen phosphorylase G Carbohydrate transport and metabolism ;}	{GO:0008184; glycogen phosphorylase activity; molecular_function GO:0005975; carbohydrate metabolic process; biological_process}	{XM_010682428.2; PREDICTED: Beta vulgaris subsp. vulgaris alpha-1,4 glucan phosphorylase L-2 isozyme, chloroplastic/amyloplastic (LOC104895815), transcript variant X1, mRNA}	{PF00343:Carbohydrate phosphorylase}
transcript_HQ_BAB_transcript4641/f2p0/3407	0.42364	0.0050009	0.010317	{XP_010675268.1; PREDICTED: alpha,alpha-trehalose-phosphate synthase [UDP-forming] 1 [Beta vulgaris subsp. vulgaris]}	{sp|Q9SYM4|TPS1_ARATH; Alpha,alpha-trehalose-phosphate synthase [UDP-forming] 1 OS=Arabidopsis thaliana GN=TPS1 PE=1 SV=1}	{bvg:104891294; K16055 TPS trehalose 6-phosphate synthase/phosphatase [EC:2.4.1.15 3.1.3.12] 2.4.1.15,3.1.3.12 ko00500; Metabolism; Carbohydrate metabolism; Starch and sucrose metabolism}	{At1g78580; KOG1050 Trehalose-6-phosphate synthase component TPS1 and related subunits G Carbohydrate transport and metabolism ;}	{GO:0003824; NA GO:0005992; trehalose biosynthetic process; biological_process}	{XM_010676966.2; PREDICTED: Beta vulgaris subsp. vulgaris alpha,alpha-trehalose-phosphate synthase [UDP-forming] 1 (LOC104891294), mRNA}	{PF00982:Glycosyltransferase family 20 PF02358:Trehalose-phosphatase}
transcript_HQ_BAB_transcript4448/f2p0/3372	-1.1257	1.0623e-06	3.3969e-06	{XP_010680730.1; PREDICTED: alpha-1,4 glucan phosphorylase L-2 isozyme, chloroplastic/amyloplastic isoform X1 [Beta vulgaris subsp. vulgaris]}	{sp|P53535|PHSL2_SOLTU; Alpha-1,4 glucan phosphorylase L-2 isozyme, chloroplastic/amyloplastic OS=Solanum tuberosum GN=STP-1 PE=1 SV=1}	{vvi:100257811; K00688 PYG, glgP glycogen phosphorylase 2.4.1.1 ko00500; Metabolism; Carbohydrate metabolism; Starch and sucrose metabolism | ko02026; Cellular Processes; Cellular community - prokaryotes; Biofilm formation - Escherichia coli | ko04910; Organismal Systems; Endocrine system; Insulin signaling pathway | ko04922; Organismal Systems; Endocrine system; Glucagon signaling pathway | ko04…	{At3g29320; KOG2099 Glycogen phosphorylase G Carbohydrate transport and metabolism ;}	{GO:0005975; carbohydrate metabolic process; biological_process GO:0008184; glycogen phosphorylase activity; molecular_function}	{XM_010682428.2; PREDICTED: Beta vulgaris subsp. vulgaris alpha-1,4 glucan phosphorylase L-2 isozyme, chloroplastic/amyloplastic (LOC104895815), transcript variant X1, mRNA}	{PF00343:Carbohydrate phosphorylase}
transcript_HQ_BAB_transcript4404/f4p0/3396	-0.49094	2.1591e-06	6.7014e-06	{XP_010696531.1; PREDICTED: sucrose-phosphate synthase [Beta vulgaris subsp. vulgaris]}	{sp|P31928|SPSA_SPIOL; Sucrose-phosphate synthase OS=Spinacia oleracea GN=SPS1 PE=1 SV=1}	{bvg:104909043; K00696 E2.4.1.14 sucrose-phosphate synthase 2.4.1.14 ko00500; Metabolism; Carbohydrate metabolism; Starch and sucrose metabolism}	{At5g20280; KOG0853 Glycosyltransferase M Cell wall/membrane/envelope biogenesis ;}	{GO:0005985; sucrose metabolic process; biological_process GO:0016157; sucrose synthase activity; molecular_function}	{XM_010698229.2; PREDICTED: Beta vulgaris subsp. vulgaris sucrose-phosphate synthase (LOC104909043), mRNA}	{PF00862:Sucrose synthase}
transcript_HQ_BAB_transcript4243/f3p0/3420	-0.47632	1.5497e-18	9.6186e-18	{XP_010673114.1; PREDICTED: 4-alpha-glucanotransferase DPE2 [Beta vulgaris subsp. vulgaris]}	{sp|Q8RXD9|DPE2_ARATH; 4-alpha-glucanotransferase DPE2 OS=Arabidopsis thaliana GN=DPE2 PE=1 SV=1}	{bvg:104889559; K00705 malQ 4-alpha-glucanotransferase 2.4.1.25 ko00500; Metabolism; Carbohydrate metabolism; Starch and sucrose metabolism}	{NA}	{GO:0005975; carbohydrate metabolic process; biological_process GO:2001070; NA GO:0004134; 4-alpha-glucanotransferase activity; molecular_function}	{XM_010674812.2; PREDICTED: Beta vulgaris subsp. vulgaris 4-alpha-glucanotransferase DPE2 (LOC104889559), mRNA}	{PF00686:Starch binding domain PF02446:4-alpha-glucanotransferase}
transcript_HQ_BAB_transcript3963/f2p0/3513	-2.3171	7.557e-29	6.5706e-28	{XP_019103079.1; PREDICTED: probable galactinol--sucrose galactosyltransferase 2 isoform X2 [Beta vulgaris subsp. vulgaris]}	{sp|Q94A08|RFS2_ARATH; Probable galactinol--sucrose galactosyltransferase 2 OS=Arabidopsis thaliana GN=RFS2 PE=2 SV=2}	{sind:105159745; K06617 E2.4.1.82 Raffinose synthase 2.4.1.82 ko00052; Metabolism; Carbohydrate metabolism; galactose metabolism}	{NA}	{NA}	{XM_019247534.1; PREDICTED: Beta vulgaris subsp. vulgaris probable galactinol--sucrose galactosyltransferase 2 (LOC104884158), transcript variant X3, mRNA}	{NA}
transcript_HQ_BAB_transcript3415/f2p0/3589	-0.91002	0.016005	0.030121	{KMT02758.1; hypothetical protein BVRB_8g193450 [Beta vulgaris subsp. vulgaris]}	{sp|P49031|SPSA_BETVU; Probable sucrose-phosphate synthase OS=Beta vulgaris GN=SPS PE=2 SV=1}	{cit:102618138; K00696 E2.4.1.14 sucrose-phosphate synthase 2.4.1.14 ko00500; Metabolism; Carbohydrate metabolism; Starch and sucrose metabolism}	{At5g20280; KOG0853 Glycosyltransferase M Cell wall/membrane/envelope biogenesis ;}	{GO:0005985; sucrose metabolic process; biological_process GO:0016157; sucrose synthase activity; molecular_function}	{NM_001303068.1; Beta vulgaris subsp. vulgaris probable sucrose-phosphate synthase (SBSPS1), mRNA}	{PF00862:Sucrose synthase}
transcript_HQ_BAB_transcript3301/f4p0/3605	0.16533	0.0084351	0.01677	{XP_010696531.1; PREDICTED: sucrose-phosphate synthase [Beta vulgaris subsp. vulgaris]}	{sp|P31928|SPSA_SPIOL; Sucrose-phosphate synthase OS=Spinacia oleracea GN=SPS1 PE=1 SV=1}	{bvg:104909043; K00696 E2.4.1.14 sucrose-phosphate synthase 2.4.1.14 ko00500; Metabolism; Carbohydrate metabolism; Starch and sucrose metabolism}	{At5g20280; KOG0853 Glycosyltransferase M Cell wall/membrane/envelope biogenesis ;}	{GO:0016157; sucrose synthase activity; molecular_function GO:0005985; sucrose metabolic process; biological_process}	{XM_010698229.2; PREDICTED: Beta vulgaris subsp. vulgaris sucrose-phosphate synthase (LOC104909043), mRNA}	{PF00862:Sucrose synthase}
transcript_HQ_BAB_transcript3189/f2p0/3645	1.2904	0.00054056	0.0012834	{XP_010675268.1; PREDICTED: alpha,alpha-trehalose-phosphate synthase [UDP-forming] 1 [Beta vulgaris subsp. vulgaris]}	{sp|Q9SYM4|TPS1_ARATH; Alpha,alpha-trehalose-phosphate synthase [UDP-forming] 1 OS=Arabidopsis thaliana GN=TPS1 PE=1 SV=1}	{bvg:104891294; K16055 TPS trehalose 6-phosphate synthase/phosphatase [EC:2.4.1.15 3.1.3.12] 2.4.1.15,3.1.3.12 ko00500; Metabolism; Carbohydrate metabolism; Starch and sucrose metabolism}	{At1g78580; KOG1050 Trehalose-6-phosphate synthase component TPS1 and related subunits G Carbohydrate transport and metabolism ;}	{GO:0005992; trehalose biosynthetic process; biological_process GO:0003824; NA}	{XM_010676966.2; PREDICTED: Beta vulgaris subsp. vulgaris alpha,alpha-trehalose-phosphate synthase [UDP-forming] 1 (LOC104891294), mRNA}	{PF00982:Glycosyltransferase family 20}
transcript_HQ_BAB_transcript2977/f2p0/3729	-1.4285	2.6307e-10	1.0909e-09	{XP_010685628.1; PREDICTED: alpha-glucan phosphorylase, H isozyme [Beta vulgaris subsp. vulgaris]}	{sp|P32811|PHSH_SOLTU; Alpha-glucan phosphorylase, H isozyme OS=Solanum tuberosum PE=1 SV=1}	{mdm:103447449; K00688 PYG, glgP glycogen phosphorylase 2.4.1.1 ko00500; Metabolism; Carbohydrate metabolism; Starch and sucrose metabolism | ko02026; Cellular Processes; Cellular community - prokaryotes; Biofilm formation - Escherichia coli | ko04910; Organismal Systems; Endocrine system; Insulin signaling pathway | ko04922; Organismal Systems; Endocrine system; Glucagon signaling pathway | ko04…	{At3g46970; KOG2099 Glycogen phosphorylase G Carbohydrate transport and metabolism ;}	{GO:0008184; glycogen phosphorylase activity; molecular_function GO:0005975; carbohydrate metabolic process; biological_process}	{XM_010687326.2; PREDICTED: Beta vulgaris subsp. vulgaris alpha-glucan phosphorylase, H isozyme (LOC104900011), mRNA}	{PF00343:Carbohydrate phosphorylase}
transcript_HQ_BAB_transcript2969/f12p0/3645	-0.52068	9.7e-08	3.3886e-07	{XP_010696531.1; PREDICTED: sucrose-phosphate synthase [Beta vulgaris subsp. vulgaris]}	{sp|P31928|SPSA_SPIOL; Sucrose-phosphate synthase OS=Spinacia oleracea GN=SPS1 PE=1 SV=1}	{bvg:104909043; K00696 E2.4.1.14 sucrose-phosphate synthase 2.4.1.14 ko00500; Metabolism; Carbohydrate metabolism; Starch and sucrose metabolism}	{At5g20280; KOG0853 Glycosyltransferase M Cell wall/membrane/envelope biogenesis ;}	{GO:0005985; sucrose metabolic process; biological_process GO:0016157; sucrose synthase activity; molecular_function}	{XM_010698229.2; PREDICTED: Beta vulgaris subsp. vulgaris sucrose-phosphate synthase (LOC104909043), mRNA}	{PF00862:Sucrose synthase}
transcript_HQ_BAB_transcript2842/f6p0/3718	1.6861	7.6161e-09	2.8673e-08	{KMT02758.1; hypothetical protein BVRB_8g193450 [Beta vulgaris subsp. vulgaris]}	{sp|P49031|SPSA_BETVU; Probable sucrose-phosphate synthase OS=Beta vulgaris GN=SPS PE=2 SV=1}	{cit:102618138; K00696 E2.4.1.14 sucrose-phosphate synthase 2.4.1.14 ko00500; Metabolism; Carbohydrate metabolism; Starch and sucrose metabolism}	{At5g20280; KOG0853 Glycosyltransferase M Cell wall/membrane/envelope biogenesis ;}	{GO:0016157; sucrose synthase activity; molecular_function GO:0005985; sucrose metabolic process; biological_process}	{NM_001303068.1; Beta vulgaris subsp. vulgaris probable sucrose-phosphate synthase (SBSPS1), mRNA}	{PF00862:Sucrose synthase}
transcript_HQ_BAB_transcript20371/f2p0/1047	0.49316	4.2123e-39	4.7491e-38	{KNA08228.1; hypothetical protein SOVF_164510 [Spinacia oleracea]}	{sp|P48494|TPIS_ORYSJ; Triosephosphate isomerase, cytosolic OS=Oryza sativa subsp. japonica GN=TPI PE=1 SV=3}	{bvg:104904128; K01803 TPI, tpiA triosephosphate isomerase (TIM) 5.3.1.1 ko01200; Metabolism; Global and overview maps; Carbon metabolism | ko01230; Metabolism; Global and overview maps; Biosynthesis of amino acids | ko00010; Metabolism; Carbohydrate metabolism; Glycolysis / Gluconeogenesis | ko00051; Metabolism; Carbohydrate metabolism; Fructose and mannose metabolism | ko00562; Metabolism; Carb…	{At3g55440; KOG1643 Triosephosphate isomerase G Carbohydrate transport and metabolism ;}	{GO:0003899; DNA-directed RNA polymerase activity; molecular_function GO:0006351; transcription, DNA-dependent; biological_process GO:0008152; NA GO:0005634; nucleus; cellular_component GO:0004807; triose-phosphate isomerase activity; molecular_function}	{XM_010692322.2; PREDICTED: Beta vulgaris subsp. vulgaris triosephosphate isomerase, cytosolic (LOC104904128), mRNA}	{PF06883:RNA polymerase I, Rpa2 specific domain PF00121:Triosephosphate isomerase}
transcript_HQ_BAB_transcript20239/f2p0/1138	0.40886	0.00034044	0.00083	{KNA20221.1; hypothetical protein SOVF_054170 [Spinacia oleracea]}	{sp|Q1W375|PMM_TOBAC; Phosphomannomutase OS=Nicotiana tabacum PE=2 SV=1}	{ini:109184321; K17497 PMM phosphomannomutase 5.4.2.8 ko00051; Metabolism; Carbohydrate metabolism; Fructose and mannose metabolism | ko00520; Metabolism; Carbohydrate metabolism; Amino sugar and nucleotide sugar metabolism}	{At2g45790; KOG3189 Phosphomannomutase I Lipid transport and metabolism ;}	{GO:0005737; cytoplasm; cellular_component GO:0009298; GDP-mannose biosynthetic process; biological_process GO:0004615; phosphomannomutase activity; molecular_function}	{XM_010669174.2; PREDICTED: Beta vulgaris subsp. vulgaris phosphomannomutase (LOC104884510), transcript variant X3, mRNA}	{PF03332:Eukaryotic phosphomannomutase}
transcript_HQ_BAB_transcript19998/f3p0/1227	0.78195	4.2831e-15	2.3032e-14	{Q43157.1; RecName: Full=Ribulose-phosphate 3-epimerase, chloroplastic; AltName: Full=Pentose-5-phosphate 3-epimerase; Short=PPE; AltName: Full=R5P3E; Short=RPE; Flags: Precursor}	{sp|Q43157|RPE_SPIOL; Ribulose-phosphate 3-epimerase, chloroplastic OS=Spinacia oleracea GN=RPE PE=1 SV=1}	{bvg:104894019; K01783 rpe, RPE ribulose-phosphate 3-epimerase 5.1.3.1 ko01200; Metabolism; Global and overview maps; Carbon metabolism | ko01230; Metabolism; Global and overview maps; Biosynthesis of amino acids | ko00030; Metabolism; Carbohydrate metabolism; Pentose phosphate pathway | ko00040; Metabolism; Carbohydrate metabolism; Pentose and glucuronate interconversions | ko00710; Metabolism; …	{At5g61410; KOG3111 D-ribulose-5-phosphate 3-epimerase G Carbohydrate transport and metabolism ;}	{GO:0016857; racemase and epimerase activity, acting on carbohydrates and derivatives; molecular_function GO:0005975; carbohydrate metabolic process; biological_process}	{AF070941.1; Spinacia oleracea ribulose-phosphate 3-epimerase (RPE) mRNA, nuclear gene encoding chloroplast protein, complete cds}	{PF00834:Ribulose-phosphate 3 epimerase family}
transcript_HQ_BAB_transcript19947/f4p0/1292	0.29181	1.7192e-07	5.8737e-07	{XP_010678478.1; PREDICTED: ribulose-phosphate 3-epimerase, chloroplastic [Beta vulgaris subsp. vulgaris]}	{sp|Q43157|RPE_SPIOL; Ribulose-phosphate 3-epimerase, chloroplastic OS=Spinacia oleracea GN=RPE PE=1 SV=1}	{bvg:104894019; K01783 rpe, RPE ribulose-phosphate 3-epimerase 5.1.3.1 ko01200; Metabolism; Global and overview maps; Carbon metabolism | ko01230; Metabolism; Global and overview maps; Biosynthesis of amino acids | ko00030; Metabolism; Carbohydrate metabolism; Pentose phosphate pathway | ko00040; Metabolism; Carbohydrate metabolism; Pentose and glucuronate interconversions | ko00710; Metabolism; …	{At5g61410; KOG3111 D-ribulose-5-phosphate 3-epimerase G Carbohydrate transport and metabolism ;}	{GO:0005576; NA GO:0007339; binding of sperm to zona pellucida; biological_process GO:0016857; racemase and epimerase activity, acting on carbohydrates and derivatives; molecular_function GO:0055114; oxidation-reduction process; biological_process GO:0003824; NA GO:0005975; carbohydrate metabolic process; biological_process}	{XM_010680176.2; PREDICTED: Beta vulgaris subsp. vulgaris ribulose-phosphate 3-epimerase, chloroplastic (LOC104894019), mRNA}	{PF00478:IMP dehydrogenase / GMP reductase domain PF07354:Zona-pellucida-binding protein (Sp38) PF00834:Ribulose-phosphate 3 epimerase family}
transcript_HQ_BAB_transcript19913/f2p0/1290	-1.682	2.9292e-48	3.9876e-47	{XP_010672242.1; PREDICTED: endochitinase [Beta vulgaris subsp. vulgaris]}	{sp|Q688M5|CHI9_ORYSJ; Chitinase 9 OS=Oryza sativa subsp. japonica GN=Cht9 PE=2 SV=1}	{bvg:104888840; K20547 CHIB basic endochitinase B 3.2.1.14 ko00520; Metabolism; Carbohydrate metabolism; Amino sugar and nucleotide sugar metabolism | ko04016; Environmental Information Processing; Signal transduction; MAPK signaling pathway - plant}	{At3g12500; KOG4742 Predicted chitinase R General function prediction only ;}	{GO:0003779; actin binding; molecular_function GO:0006032; chitin catabolic process; biological_process GO:0004568; chitinase activity; molecular_function GO:0008061; chitin binding; molecular_function GO:0007010; cytoskeleton organization; biological_process GO:0016998; cell wall macromolecule catabolic process; biological_process}	{XM_010673940.1; PREDICTED: Beta vulgaris subsp. vulgaris endochitinase (LOC104888840), mRNA}	{PF01213:Adenylate cyclase associated (CAP) N terminal PF00182:Chitinase class I PF00187:Chitin recognition protein}
transcript_HQ_BAB_transcript19896/f2p0/1304	1.4766	6.4155e-54	9.62e-53	{XP_010674148.1; PREDICTED: probable ribose-5-phosphate isomerase 2 [Beta vulgaris subsp. vulgaris]}	{sp|Q9ZU38|RPI2_ARATH; Probable ribose-5-phosphate isomerase 2 OS=Arabidopsis thaliana GN=RPI2 PE=1 SV=1}	{bvg:104890380; K01807 rpiA ribose 5-phosphate isomerase A 5.3.1.6 ko01200; Metabolism; Global and overview maps; Carbon metabolism | ko01230; Metabolism; Global and overview maps; Biosynthesis of amino acids | ko00030; Metabolism; Carbohydrate metabolism; pentose phosphate pathway | ko00710; Metabolism; Energy metabolism; Carbon fixation in photosynthetic organisms}	{At2g01290; KOG3075 Ribose 5-phosphate isomerase G Carbohydrate transport and metabolism ;}	{GO:0004751; ribose-5-phosphate isomerase activity; molecular_function GO:0009052; pentose-phosphate shunt, non-oxidative branch; biological_process}	{NA}	{PF06026:Ribose 5-phosphate isomerase A (phosphoriboisomerase A)}
transcript_HQ_BAB_transcript19797/f2p0/1344	1.0736	1.7028e-12	8.052e-12	{XP_010674553.1; PREDICTED: galactinol synthase 2 [Beta vulgaris subsp. vulgaris]}	{sp|Q9FXB2|GOLS2_ARATH; Galactinol synthase 2 OS=Arabidopsis thaliana GN=GOLS2 PE=1 SV=1}	{bvg:104890674; K18819 GOLS inositol 3-alpha-galactosyltransferase 2.4.1.123 ko00052; Metabolism; Carbohydrate metabolism; galactose metabolism}	{At1g56600; KOG1950 Glycosyl transferase, family 8 - glycogenin G Carbohydrate transport and metabolism ;}	{GO:0016757; transferase activity, transferring glycosyl groups; molecular_function GO:0006486; protein glycosylation; biological_process}	{XM_010676251.1; PREDICTED: Beta vulgaris subsp. vulgaris galactinol synthase 2 (LOC104890674), mRNA}	{PF11051:Mannosyltransferase putative PF01501:Glycosyl transferase family 8}
transcript_HQ_BAB_transcript19743/f2p0/1379	0.44756	3.382e-11	1.4834e-10	{XP_010685807.1; PREDICTED: UDP-glucuronic acid decarboxylase 5 [Beta vulgaris subsp. vulgaris]}	{sp|Q9FIE8|UXS3_ARATH; UDP-glucuronic acid decarboxylase 3 OS=Arabidopsis thaliana GN=UXS3 PE=1 SV=1}	{gra:105788858; K08678 UXS1, uxs UDP-glucuronate decarboxylase 4.1.1.35 ko00520; Metabolism; Carbohydrate metabolism; Amino sugar and nucleotide sugar metabolism}	{At5g59290; KOG1429 dTDP-glucose 4-6-dehydratase/UDP-glucuronic acid decarboxylase GM Carbohydrate transport and metabolism ; Cell wall/membrane/envelope biogenesis ;}	{GO:0003824; NA GO:0055114; oxidation-reduction process; biological_process GO:0016616; oxidoreductase activity, acting on the CH-OH group of donors, NAD or NADP as acceptor; molecular_function GO:0006694; steroid biosynthetic process; biological_process GO:0003854; 3-beta-hydroxy-delta5-steroid dehydrogenase activity; molecular_function GO:0050662; coenzyme binding; molecular_function}	{XM_010687505.2; PREDICTED: Beta vulgaris subsp. vulgaris UDP-glucuronic acid decarboxylase 5 (LOC104900149), transcript variant X1, mRNA}	{PF01073:3-beta hydroxysteroid dehydrogenase/isomerase family PF01370:NAD dependent epimerase/dehydratase family}
transcript_HQ_BAB_transcript19664/f6p0/1343	-0.68771	3.8363e-34	3.8505e-33	{XP_010684945.1; PREDICTED: probable pectate lyase 4 [Beta vulgaris subsp. vulgaris]}	{sp|Q9C8G4|PLY4_ARATH; Probable pectate lyase 4 OS=Arabidopsis thaliana GN=At1g30350 PE=2 SV=1}	{jcu:105636240; K01728 pel pectate lyase 4.2.2.2 ko00040; Metabolism; Carbohydrate metabolism; Pentose and glucuronate interconversions | ko02024; Cellular Processes; Cellular community - prokaryotes; Quorum sensing}	{NA}	{NA}	{XM_010686643.2; PREDICTED: Beta vulgaris subsp. vulgaris probable pectate lyase 4 (LOC104899447), mRNA}	{NA}
transcript_HQ_BAB_transcript19505/f2p0/1420	0.48876	8.8316e-20	5.7644e-19	{KNA10695.1; hypothetical protein SOVF_141960 [Spinacia oleracea]}	{sp|P28475|S6PD_MALDO; NADP-dependent D-sorbitol-6-phosphate dehydrogenase OS=Malus domestica GN=S6PDH PE=2 SV=1}	{cic:CICLE_v10028892mg; K00011 E1.1.1.21, AKR1 aldehyde reductase 1.1.1.21 ko00040; Metabolism; Carbohydrate metabolism; Pentose and glucuronate interconversions | ko00051; Metabolism; Carbohydrate metabolism; Fructose and mannose metabolism | ko00052; Metabolism; Carbohydrate metabolism; galactose metabolism | ko00561; Metabolism; Lipid metabolism; Glycerolipid metabolism}	{At2g21250; KOG1577 Aldo/keto reductase family proteins R General function prediction only ;}	{NA}	{XM_010669428.2; PREDICTED: Beta vulgaris subsp. vulgaris NADP-dependent D-sorbitol-6-phosphate dehydrogenase (LOC104884740), mRNA}	{NA}
transcript_HQ_BAB_transcript19492/f6p0/1341	-0.18122	0.0032169	0.0068487	{XP_010678478.1; PREDICTED: ribulose-phosphate 3-epimerase, chloroplastic [Beta vulgaris subsp. vulgaris]}	{sp|Q43157|RPE_SPIOL; Ribulose-phosphate 3-epimerase, chloroplastic OS=Spinacia oleracea GN=RPE PE=1 SV=1}	{bvg:104894019; K01783 rpe, RPE ribulose-phosphate 3-epimerase 5.1.3.1 ko01200; Metabolism; Global and overview maps; Carbon metabolism | ko01230; Metabolism; Global and overview maps; Biosynthesis of amino acids | ko00030; Metabolism; Carbohydrate metabolism; Pentose phosphate pathway | ko00040; Metabolism; Carbohydrate metabolism; Pentose and glucuronate interconversions | ko00710; Metabolism; …	{At5g61410; KOG3111 D-ribulose-5-phosphate 3-epimerase G Carbohydrate transport and metabolism ;}	{GO:0016857; racemase and epimerase activity, acting on carbohydrates and derivatives; molecular_function GO:0005576; NA GO:0007339; binding of sperm to zona pellucida; biological_process GO:0003824; NA GO:0005975; carbohydrate metabolic process; biological_process GO:0055114; oxidation-reduction process; biological_process}	{XM_010680176.2; PREDICTED: Beta vulgaris subsp. vulgaris ribulose-phosphate 3-epimerase, chloroplastic (LOC104894019), mRNA}	{PF00478:IMP dehydrogenase / GMP reductase domain PF07354:Zona-pellucida-binding protein (Sp38) PF00834:Ribulose-phosphate 3 epimerase family}
transcript_HQ_BAB_transcript19428/f2p0/1426	-0.64326	0.00069187	0.001622	{XP_010674148.1; PREDICTED: probable ribose-5-phosphate isomerase 2 [Beta vulgaris subsp. vulgaris]}	{sp|Q9ZU38|RPI2_ARATH; Probable ribose-5-phosphate isomerase 2 OS=Arabidopsis thaliana GN=RPI2 PE=1 SV=1}	{bvg:104890380; K01807 rpiA ribose 5-phosphate isomerase A 5.3.1.6 ko01200; Metabolism; Global and overview maps; Carbon metabolism | ko01230; Metabolism; Global and overview maps; Biosynthesis of amino acids | ko00030; Metabolism; Carbohydrate metabolism; pentose phosphate pathway | ko00710; Metabolism; Energy metabolism; Carbon fixation in photosynthetic organisms}	{At2g01290; KOG3075 Ribose 5-phosphate isomerase G Carbohydrate transport and metabolism ;}	{GO:0009052; pentose-phosphate shunt, non-oxidative branch; biological_process GO:0004751; ribose-5-phosphate isomerase activity; molecular_function}	{NA}	{PF06026:Ribose 5-phosphate isomerase A (phosphoriboisomerase A)}
transcript_HQ_BAB_transcript19375/f2p0/1439	0.69131	0.011875	0.022892	{XP_010671356.1; PREDICTED: probable 6-phosphogluconolactonase 4, chloroplastic isoform X1 [Beta vulgaris subsp. vulgaris]}	{sp|Q69NG5|6PGL4_ORYSJ; Probable 6-phosphogluconolactonase 4, chloroplastic OS=Oryza sativa subsp. japonica GN=Os09g0529100 PE=2 SV=2}	{bvg:104888171; K01057 PGLS, pgl, devB 6-phosphogluconolactonase 3.1.1.31 ko01200; Metabolism; Global and overview maps; Carbon metabolism | ko00030; Metabolism; Carbohydrate metabolism; pentose phosphate pathway}	{At5g24400; KOG3147 6-phosphogluconolactonase - like protein G Carbohydrate transport and metabolism ;}	{GO:0005975; carbohydrate metabolic process; biological_process}	{XM_010673054.2; PREDICTED: Beta vulgaris subsp. vulgaris probable 6-phosphogluconolactonase 4, chloroplastic (LOC104888171), transcript variant X1, mRNA}	{PF01182:Glucosamine-6-phosphate isomerases/6-phosphogluconolactonase}
transcript_HQ_BAB_transcript19349/f9p0/1433	0.58528	1.0876e-38	1.2139e-37	{KNA03849.1; hypothetical protein SOVF_205230 [Spinacia oleracea]}	{sp|O65581|ALFC5_ARATH; Fructose-bisphosphate aldolase 5, cytosolic OS=Arabidopsis thaliana GN=FBA5 PE=1 SV=1}	{bvg:104892005; K01623 ALDO fructose-bisphosphate aldolase, class I 4.1.2.13 ko01200; Metabolism; Global and overview maps; Carbon metabolism | ko01230; Metabolism; Global and overview maps; Biosynthesis of amino acids | ko00010; Metabolism; Carbohydrate metabolism; Glycolysis / Gluconeogenesis | ko00030; Metabolism; Carbohydrate metabolism; Pentose phosphate pathway | ko00051; Metabolism; Carboh…	{At4g26530; KOG1557 Fructose-biphosphate aldolase G Carbohydrate transport and metabolism ;}	{GO:0006096; glycolysis; biological_process GO:0004332; fructose-bisphosphate aldolase activity; molecular_function}	{XM_010677812.2; PREDICTED: Beta vulgaris subsp. vulgaris fructose-bisphosphate aldolase 5, cytosolic (LOC104892005), mRNA}	{PF00274:Fructose-bisphosphate aldolase class-I}
transcript_HQ_BAB_transcript18876/f3p0/1527	-0.55394	6.2139e-49	8.5529e-48	{KNA14982.1; hypothetical protein SOVF_102320 [Spinacia oleracea]}	{sp|Q8RU27|UPTG2_SOLTU; Alpha-1,4-glucan-protein synthase [UDP-forming] 2 OS=Solanum tuberosum GN=UPTG2 PE=1 SV=1}	{gmx:100788017; K13379 RGP, UTM reversibly glycosylated polypeptide / UDP-arabinopyranose mutase [EC:2.4.1.- 5.4.99.30] 2.4.1.-,5.4.99.30 ko00520; Metabolism; Carbohydrate metabolism; Amino sugar and nucleotide sugar metabolism}	{NA}	{GO:0030244; cellulose biosynthetic process; biological_process GO:0016866; intramolecular transferase activity; molecular_function}	{XM_010696958.2; PREDICTED: Beta vulgaris subsp. vulgaris alpha-1,4-glucan-protein synthase [UDP-forming] 2 (LOC104907929), mRNA}	{PF03214:Reversibly glycosylated polypeptide}
transcript_HQ_BAB_transcript18850/f2p0/1541	-0.48944	0.0046323	0.0096132	{KNA20068.1; hypothetical protein SOVF_055820 [Spinacia oleracea]}	{sp|P22418|F16P1_SPIOL; Fructose-1,6-bisphosphatase, chloroplastic OS=Spinacia oleracea PE=1 SV=2}	{rcu:8279069; K03841 FBP, fbp fructose-1,6-bisphosphatase I 3.1.3.11 ko01200; Metabolism; Global and overview maps; Carbon metabolism | ko00010; Metabolism; Carbohydrate metabolism; Glycolysis / Gluconeogenesis | ko00030; Metabolism; Carbohydrate metabolism; Pentose phosphate pathway | ko00051; Metabolism; Carbohydrate metabolism; Fructose and mannose metabolism | ko00710; Metabolism; Energy meta…	{At5g64380; KOG1458 Fructose-1,6-bisphosphatase G Carbohydrate transport and metabolism ;}	{GO:0016437; tRNA cytidylyltransferase activity; molecular_function GO:0046854; phosphatidylinositol phosphorylation; biological_process GO:0004810; tRNA adenylyltransferase activity; molecular_function}	{XM_010693085.2; PREDICTED: Beta vulgaris subsp. vulgaris fructose-1,6-bisphosphatase, chloroplastic (LOC104904724), mRNA}	{PF00459:Inositol monophosphatase family PF09249:tRNA nucleotidyltransferase, second domain}
transcript_HQ_BAB_transcript18837/f2p0/1555	0.79059	2.014e-16	1.1433e-15	{XP_010691964.1; PREDICTED: ribose-phosphate pyrophosphokinase 1 [Beta vulgaris subsp. vulgaris]}	{sp|Q9XG98|KPRS1_SPIOL; Ribose-phosphate pyrophosphokinase 1 OS=Spinacia oleracea GN=PRS1 PE=2 SV=1}	{rcu:8266684; K00948 PRPS, prsA ribose-phosphate pyrophosphokinase 2.7.6.1 ko01200; Metabolism; Global and overview maps; Carbon metabolism | ko01230; Metabolism; Global and overview maps; Biosynthesis of amino acids | ko00030; Metabolism; Carbohydrate metabolism; pentose phosphate pathway | ko00230; Metabolism; Nucleotide metabolism; Purine metabolism}	{At2g44530; KOG1448 Ribose-phosphate pyrophosphokinase FE Nucleotide transport and metabolism ; Amino acid transport and metabolism ;}	{GO:0000287; magnesium ion binding; molecular_function GO:0004749; ribose phosphate diphosphokinase activity; molecular_function GO:0009116; nucleoside metabolic process; biological_process GO:0009165; nucleotide biosynthetic process; biological_process}	{XM_010693662.2; PREDICTED: Beta vulgaris subsp. vulgaris ribose-phosphate pyrophosphokinase 1 (LOC104905206), mRNA}	{PF00156:Phosphoribosyl transferase domain PF14572:Phosphoribosyl synthetase-associated domain}
transcript_HQ_BAB_transcript18785/f2p0/1551	0.33523	9.8811e-05	0.00025742	{XP_010680759.1; PREDICTED: chitotriosidase-1 [Beta vulgaris subsp. vulgaris]}	{sp|Q13231|CHIT1_HUMAN; Chitotriosidase-1 OS=Homo sapiens GN=CHIT1 PE=1 SV=1}	{ini:109177059; K01183 E3.2.1.14 chitinase 3.2.1.14 ko00520; Metabolism; Carbohydrate metabolism; Amino sugar and nucleotide sugar metabolism}	{At4g19810; KOG2806 Chitinase G Carbohydrate transport and metabolism ;}	{GO:0004553; hydrolase activity, hydrolyzing O-glycosyl compounds; molecular_function GO:0005975; carbohydrate metabolic process; biological_process}	{XM_010682457.2; PREDICTED: Beta vulgaris subsp. vulgaris chitotriosidase-1 (LOC104895832), mRNA}	{PF00704:Glycosyl hydrolases family 18}
transcript_HQ_BAB_transcript18689/f2p0/1566	0.34704	1.4428e-27	1.2035e-26	{XP_010677936.1; PREDICTED: glyceraldehyde-3-phosphate dehydrogenase [Beta vulgaris subsp. vulgaris]}	{sp|P34783|G3P_ATRNU; Glyceraldehyde-3-phosphate dehydrogenase OS=Atriplex nummularia PE=2 SV=1}	{bvg:104893518; K00134 GAPDH, gapA glyceraldehyde 3-phosphate dehydrogenase 1.2.1.12 ko01200; Metabolism; Global and overview maps; Carbon metabolism | ko01230; Metabolism; Global and overview maps; Biosynthesis of amino acids | ko00010; Metabolism; Carbohydrate metabolism; Glycolysis / gluconeogenesis | ko00710; Metabolism; Energy metabolism; Carbon fixation in photosynthetic organisms | ko04066…	{At1g13440; KOG0657 Glyceraldehyde 3-phosphate dehydrogenase G Carbohydrate transport and metabolism ;}	{GO:0009089; lysine biosynthetic process via diaminopimelate; biological_process GO:0016620; oxidoreductase activity, acting on the aldehyde or oxo group of donors, NAD or NADP as acceptor; molecular_function GO:0051287; NAD binding; molecular_function GO:0008839; dihydrodipicolinate reductase activity; molecular_function GO:0055114; oxidation-reduction process; biological_process}	{EF408234.1; Beta vulgaris glyceraldehyde-3-phosphate dehydogenase mRNA, complete cds}	{PF02800:Glyceraldehyde 3-phosphate dehydrogenase, C-terminal domain PF01113:Dihydrodipicolinate reductase, N-terminus PF00044:Glyceraldehyde 3-phosphate dehydrogenase, NAD binding domain PF02826:D-isomer specific 2-hydroxyacid dehydrogenase, NAD binding domain}
transcript_HQ_BAB_transcript18476/f3p0/1615	-0.76764	1.6663e-14	8.7122e-14	{KNA13313.1; hypothetical protein SOVF_115900 isoform A [Spinacia oleracea]}	{sp|Q6MEW4|GPMA_PARUW; 2,3-bisphosphoglycerate-dependent phosphoglycerate mutase OS=Protochlamydia amoebophila (strain UWE25) GN=gpmA PE=3 SV=1}	{bvg:104892681; K01834 PGAM, gpmA 2,3-bisphosphoglycerate-dependent phosphoglycerate mutase 5.4.2.11 ko01200; Metabolism; Global and overview maps; Carbon metabolism | ko01230; Metabolism; Global and overview maps; Biosynthesis of amino acids | ko00010; Metabolism; Carbohydrate metabolism; Glycolysis / gluconeogenesis | ko00680; Metabolism; Energy metabolism; Methane metabolism | ko00260; Metabol…	{At1g22170; KOG0235 Phosphoglycerate mutase G Carbohydrate transport and metabolism ;}	{NA}	{XM_019248949.1; PREDICTED: Beta vulgaris subsp. vulgaris 2,3-bisphosphoglycerate-dependent phosphoglycerate mutase (LOC104892681), transcript variant X2, mRNA}	{NA}
transcript_HQ_BAB_transcript18459/f2p0/1612	-0.3092	1.5803e-08	5.8249e-08	{OAY48394.1; hypothetical protein MANES_06G155500 [Manihot esculenta]}	{sp|P36908|CHIA_CICAR; Acidic endochitinase OS=Cicer arietinum PE=2 SV=1}	{bvg:104888322; K01183 E3.2.1.14 chitinase 3.2.1.14 ko00520; Metabolism; Carbohydrate metabolism; Amino sugar and nucleotide sugar metabolism}	{At5g24090; KOG4701 Chitinase M Cell wall/membrane/envelope biogenesis ;}	{GO:0004553; hydrolase activity, hydrolyzing O-glycosyl compounds; molecular_function GO:0005975; carbohydrate metabolic process; biological_process}	{XM_010673614.1; PREDICTED: Beta vulgaris subsp. vulgaris acidic endochitinase (LOC104888591), mRNA}	{PF00704:Glycosyl hydrolases family 18}
transcript_HQ_BAB_transcript18352/f2p0/1638	0.23833	0.015279	0.02886	{XP_010683784.1; PREDICTED: fructose-bisphosphate aldolase 3, chloroplastic [Beta vulgaris subsp. vulgaris]}	{sp|Q9ZU52|ALFP3_ARATH; Fructose-bisphosphate aldolase 3, chloroplastic OS=Arabidopsis thaliana GN=FBA3 PE=1 SV=1}	{rcu:8275109; K01623 ALDO fructose-bisphosphate aldolase, class I 4.1.2.13 ko01200; Metabolism; Global and overview maps; Carbon metabolism | ko01230; Metabolism; Global and overview maps; Biosynthesis of amino acids | ko00010; Metabolism; Carbohydrate metabolism; Glycolysis / Gluconeogenesis | ko00030; Metabolism; Carbohydrate metabolism; Pentose phosphate pathway | ko00051; Metabolism; Carbohyd…	{At2g01140; KOG1557 Fructose-biphosphate aldolase G Carbohydrate transport and metabolism ;}	{GO:0004332; fructose-bisphosphate aldolase activity; molecular_function GO:0006096; glycolysis; biological_process}	{XM_010685482.2; PREDICTED: Beta vulgaris subsp. vulgaris fructose-bisphosphate aldolase 3, chloroplastic (LOC104898399), mRNA}	{PF00274:Fructose-bisphosphate aldolase class-I}
transcript_HQ_BAB_transcript18248/f3p0/1633	0.83255	8.8562e-25	6.8365e-24	{KNA24212.1; hypothetical protein SOVF_017600 [Spinacia oleracea]}	{sp|Q6Z1G7|ODPB1_ORYSJ; Pyruvate dehydrogenase E1 component subunit beta-1, mitochondrial OS=Oryza sativa subsp. japonica GN=Os08g0536000 PE=2 SV=1}	{nnu:104592796; K00162 PDHB, pdhB pyruvate dehydrogenase E1 component beta subunit 1.2.4.1 ko01200; Metabolism; Global and overview maps; Carbon metabolism | ko00010; Metabolism; Carbohydrate metabolism; Glycolysis / gluconeogenesis | ko00020; Metabolism; Carbohydrate metabolism; Citrate cycle (TCA cycle) | ko00620; Metabolism; Carbohydrate metabolism; Pyruvate metabolism | ko04066; Environmental…	{At5g50850; KOG0524 Pyruvate dehydrogenase E1, beta subunit C Energy production and conversion ;}	{NA}	{XR_790643.2; PREDICTED: Beta vulgaris subsp. vulgaris pyruvate dehydrogenase E1 component subunit beta-1, mitochondrial-like (LOC104897495), transcript variant X3, misc_RNA}	{NA}
transcript_HQ_BAB_transcript18203/f3p0/1635	-1.8301	7.3018e-119	2.4684e-117	{KNA17500.1; hypothetical protein SOVF_079370 [Spinacia oleracea]}	{sp|Q6Z1G7|ODPB1_ORYSJ; Pyruvate dehydrogenase E1 component subunit beta-1, mitochondrial OS=Oryza sativa subsp. japonica GN=Os08g0536000 PE=2 SV=1}	{bvg:104893881; K00162 PDHB, pdhB pyruvate dehydrogenase E1 component beta subunit 1.2.4.1 ko01200; Metabolism; Global and overview maps; Carbon metabolism | ko00010; Metabolism; Carbohydrate metabolism; Glycolysis / gluconeogenesis | ko00020; Metabolism; Carbohydrate metabolism; Citrate cycle (TCA cycle) | ko00620; Metabolism; Carbohydrate metabolism; Pyruvate metabolism | ko04066; Environmental…	{At5g50850; KOG0524 Pyruvate dehydrogenase E1, beta subunit C Energy production and conversion ;}	{NA}	{XM_010680010.2; PREDICTED: Beta vulgaris subsp. vulgaris pyruvate dehydrogenase E1 component subunit beta-1, mitochondrial (LOC104893881), mRNA}	{NA}
transcript_HQ_BAB_transcript18180/f10p0/1557	-0.21794	2.3863e-08	8.6764e-08	{KNA25346.1; hypothetical protein SOVF_007400 [Spinacia oleracea]}	{sp|Q9SAJ4|PGKY3_ARATH; Phosphoglycerate kinase 3, cytosolic OS=Arabidopsis thaliana GN=PGK3 PE=1 SV=1}	{bvg:104887096; K00927 PGK, pgk phosphoglycerate kinase 2.7.2.3 ko01200; Metabolism; Global and overview maps; Carbon metabolism | ko01230; Metabolism; Global and overview maps; Biosynthesis of amino acids | ko00010; Metabolism; Carbohydrate metabolism; Glycolysis / gluconeogenesis | ko00710; Metabolism; Energy metabolism; Carbon fixation in photosynthetic organisms}	{At1g79550; KOG1367 3-phosphoglycerate kinase G Carbohydrate transport and metabolism ;}	{GO:0000156; two-component response regulator activity; molecular_function GO:0003677; DNA binding; molecular_function GO:0006096; glycolysis; biological_process GO:0004618; phosphoglycerate kinase activity; molecular_function GO:0000160; two-component signal transduction system (phosphorelay); biological_process GO:0005524; ATP binding; molecular_function}	{XM_010671683.2; PREDICTED: Beta vulgaris subsp. vulgaris phosphoglycerate kinase 3, cytosolic (LOC104887096), mRNA}	{PF06506:Propionate catabolism activator PF00162:Phosphoglycerate kinase}
transcript_HQ_BAB_transcript18130/f3p0/1651	0.80523	6.4882e-22	4.5497e-21	{XP_010679767.1; PREDICTED: mannan endo-1,4-beta-mannosidase 7 [Beta vulgaris subsp. vulgaris]}	{sp|Q9FJZ3|MAN7_ARATH; Mannan endo-1,4-beta-mannosidase 7 OS=Arabidopsis thaliana GN=MAN7 PE=2 SV=1}	{pper:PRUPE_ppa005992mg; K19355 MAN mannan endo-1,4-beta-mannosidase 3.2.1.78 ko00051; Metabolism; Carbohydrate metabolism; Fructose and mannose metabolism}	{NA}	{GO:0009341; beta-galactosidase complex; cellular_component GO:0004553; hydrolase activity, hydrolyzing O-glycosyl compounds; molecular_function GO:0004565; beta-galactosidase activity; molecular_function GO:0005975; carbohydrate metabolic process; biological_process}	{XM_010681465.2; PREDICTED: Beta vulgaris subsp. vulgaris mannan endo-1,4-beta-mannosidase 7 (LOC104895061), mRNA}	{PF00150:Cellulase (glycosyl hydrolase family 5) PF02449:Beta-galactosidase PF02836:Glycosyl hydrolases family 2, TIM barrel domain}
transcript_HQ_BAB_transcript17787/f16p0/1688	-0.66744	3.2939e-20	2.1823e-19	{XP_010691935.1; PREDICTED: GDP-mannose 4,6 dehydratase 1 [Beta vulgaris subsp. vulgaris]}	{sp|P93031|GMD2_ARATH; GDP-mannose 4,6 dehydratase 2 OS=Arabidopsis thaliana GN=MUR1 PE=1 SV=3}	{cit:102613014; K01711 gmd, GMDS GDPmannose 4,6-dehydratase 4.2.1.47 ko00051; Metabolism; Carbohydrate metabolism; Fructose and mannose metabolism | ko00520; Metabolism; Carbohydrate metabolism; Amino sugar and nucleotide sugar metabolism}	{At5g66280; KOG1372 GDP-mannose 4,6 dehydratase G Carbohydrate transport and metabolism ;}	{GO:0003824; NA GO:0050662; coenzyme binding; molecular_function}	{XM_010693633.2; PREDICTED: Beta vulgaris subsp. vulgaris GDP-mannose 4,6 dehydratase 1 (LOC104905183), mRNA}	{PF01370:NAD dependent epimerase/dehydratase family}
transcript_HQ_BAB_transcript17693/f3p0/1772	0.77305	5.5484e-18	3.3725e-17	{XP_010669994.1; PREDICTED: phosphoglycerate kinase, chloroplastic [Beta vulgaris subsp. vulgaris]}	{sp|P29409|PGKH_SPIOL; Phosphoglycerate kinase, chloroplastic (Fragment) OS=Spinacia oleracea PE=2 SV=2}	{bvg:104887103; K00927 PGK, pgk phosphoglycerate kinase 2.7.2.3 ko01200; Metabolism; Global and overview maps; Carbon metabolism | ko01230; Metabolism; Global and overview maps; Biosynthesis of amino acids | ko00010; Metabolism; Carbohydrate metabolism; Glycolysis / gluconeogenesis | ko00710; Metabolism; Energy metabolism; Carbon fixation in photosynthetic organisms}	{At1g56190; KOG1367 3-phosphoglycerate kinase G Carbohydrate transport and metabolism ;}	{GO:0006096; glycolysis; biological_process GO:0003677; DNA binding; molecular_function GO:0000156; two-component response regulator activity; molecular_function GO:0000160; two-component signal transduction system (phosphorelay); biological_process GO:0004618; phosphoglycerate kinase activity; molecular_function GO:0005524; ATP binding; molecular_function}	{XM_010671692.2; PREDICTED: Beta vulgaris subsp. vulgaris phosphoglycerate kinase, chloroplastic (LOC104887103), mRNA}	{PF06506:Propionate catabolism activator PF00162:Phosphoglycerate kinase}
transcript_HQ_BAB_transcript17612/f11p0/1713	-3.3557	3.4317e-263	3.0593e-261	{XP_010674968.1; PREDICTED: aldehyde dehydrogenase family 3 member H1 [Beta vulgaris subsp. vulgaris]}	{sp|Q70DU8|AL3H1_ARATH; Aldehyde dehydrogenase family 3 member H1 OS=Arabidopsis thaliana GN=ALDH3H1 PE=1 SV=2}	{bvg:104891026; K00128 ALDH aldehyde dehydrogenase (NAD+) 1.2.1.3 ko00010; Metabolism; Carbohydrate metabolism; Glycolysis / gluconeogenesis | ko00053; Metabolism; Carbohydrate metabolism; Ascorbate and aldarate metabolism | ko00620; Metabolism; Carbohydrate metabolism; Pyruvate metabolism | ko00071; Metabolism; Lipid metabolism; Fatty acid degradation | ko00561; Metabolism; Lipid metabolism; Gly…	{At1g44170; KOG2456 Aldehyde dehydrogenase C Energy production and conversion ;}	{GO:0016491; oxidoreductase activity; molecular_function GO:0008152; NA GO:0055114; oxidation-reduction process; biological_process}	{XM_010676666.2; PREDICTED: Beta vulgaris subsp. vulgaris aldehyde dehydrogenase family 3 member H1 (LOC104891026), mRNA}	{PF00171:Aldehyde dehydrogenase family}
transcript_HQ_BAB_transcript17597/f2p0/1732	1.2832	5.68e-45	7.225e-44	{KNA17500.1; hypothetical protein SOVF_079370 [Spinacia oleracea]}	{sp|Q6Z1G7|ODPB1_ORYSJ; Pyruvate dehydrogenase E1 component subunit beta-1, mitochondrial OS=Oryza sativa subsp. japonica GN=Os08g0536000 PE=2 SV=1}	{bvg:104893881; K00162 PDHB, pdhB pyruvate dehydrogenase E1 component beta subunit 1.2.4.1 ko01200; Metabolism; Global and overview maps; Carbon metabolism | ko00010; Metabolism; Carbohydrate metabolism; Glycolysis / gluconeogenesis | ko00020; Metabolism; Carbohydrate metabolism; Citrate cycle (TCA cycle) | ko00620; Metabolism; Carbohydrate metabolism; Pyruvate metabolism | ko04066; Environmental…	{At5g50850; KOG0524 Pyruvate dehydrogenase E1, beta subunit C Energy production and conversion ;}	{NA}	{XM_010680010.2; PREDICTED: Beta vulgaris subsp. vulgaris pyruvate dehydrogenase E1 component subunit beta-1, mitochondrial (LOC104893881), mRNA}	{NA}
transcript_HQ_BAB_transcript17574/f3p0/1728	-0.39639	5.9616e-21	4.054e-20	{AFQ23972.1; pathogenesis related protein 8, partial [Malus domestica]}	{sp|P36908|CHIA_CICAR; Acidic endochitinase OS=Cicer arietinum PE=2 SV=1}	{bvg:104888322; K01183 E3.2.1.14 chitinase 3.2.1.14 ko00520; Metabolism; Carbohydrate metabolism; Amino sugar and nucleotide sugar metabolism}	{At5g24090; KOG4701 Chitinase M Cell wall/membrane/envelope biogenesis ;}	{GO:0004553; hydrolase activity, hydrolyzing O-glycosyl compounds; molecular_function GO:0005975; carbohydrate metabolic process; biological_process}	{XM_010673614.1; PREDICTED: Beta vulgaris subsp. vulgaris acidic endochitinase (LOC104888591), mRNA}	{PF00704:Glycosyl hydrolases family 18}
transcript_HQ_BAB_transcript17410/f2p0/1745	-0.1783	0.012101	0.0233	{XP_010674690.1; PREDICTED: probable UDP-arabinopyranose mutase 5 [Beta vulgaris subsp. vulgaris]}	{sp|Q9FFD2|RGP5_ARATH; Probable UDP-arabinopyranose mutase 5 OS=Arabidopsis thaliana GN=RGP5 PE=1 SV=1}	{bvg:104890796; K13379 RGP, UTM reversibly glycosylated polypeptide / UDP-arabinopyranose mutase [EC:2.4.1.- 5.4.99.30] 2.4.1.-,5.4.99.30 ko00520; Metabolism; Carbohydrate metabolism; Amino sugar and nucleotide sugar metabolism}	{NA}	{GO:0003723; RNA binding; molecular_function GO:0003746; translation elongation factor activity; molecular_function GO:0006452; translational frameshifting; biological_process GO:0016866; intramolecular transferase activity; molecular_function GO:0045901; positive regulation of translational elongation; biological_process GO:0043022; ribosome binding; molecular_function GO:0045905; positive regul…	{XM_010676388.2; PREDICTED: Beta vulgaris subsp. vulgaris probable UDP-arabinopyranose mutase 5 (LOC104890796), mRNA}	{PF03214:Reversibly glycosylated polypeptide PF01287:Eukaryotic elongation factor 5A hypusine, DNA-binding OB fold}
transcript_HQ_BAB_transcript17304/f3p0/1755	-0.36248	5.423e-12	2.4822e-11	{XP_010669994.1; PREDICTED: phosphoglycerate kinase, chloroplastic [Beta vulgaris subsp. vulgaris]}	{sp|P29409|PGKH_SPIOL; Phosphoglycerate kinase, chloroplastic (Fragment) OS=Spinacia oleracea PE=2 SV=2}	{bvg:104887103; K00927 PGK, pgk phosphoglycerate kinase 2.7.2.3 ko01200; Metabolism; Global and overview maps; Carbon metabolism | ko01230; Metabolism; Global and overview maps; Biosynthesis of amino acids | ko00010; Metabolism; Carbohydrate metabolism; Glycolysis / gluconeogenesis | ko00710; Metabolism; Energy metabolism; Carbon fixation in photosynthetic organisms}	{At1g56190; KOG1367 3-phosphoglycerate kinase G Carbohydrate transport and metabolism ;}	{GO:0006096; glycolysis; biological_process GO:0000156; two-component response regulator activity; molecular_function GO:0003677; DNA binding; molecular_function GO:0004618; phosphoglycerate kinase activity; molecular_function GO:0000160; two-component signal transduction system (phosphorelay); biological_process GO:0005524; ATP binding; molecular_function}	{XM_010671692.2; PREDICTED: Beta vulgaris subsp. vulgaris phosphoglycerate kinase, chloroplastic (LOC104887103), mRNA}	{PF00162:Phosphoglycerate kinase PF06506:Propionate catabolism activator}
transcript_HQ_BAB_transcript17299/f51p0/1697	0.61024	3.2667e-49	4.5229e-48	{KNA07801.1; hypothetical protein SOVF_168640 [Spinacia oleracea]}	{sp|Q9M0B6|GAE1_ARATH; UDP-glucuronate 4-epimerase 1 OS=Arabidopsis thaliana GN=GAE1 PE=1 SV=1}	{pmum:103323359; K08679 E5.1.3.6 UDP-glucuronate 4-epimerase 5.1.3.6 ko00520; Metabolism; Carbohydrate metabolism; Amino sugar and nucleotide sugar metabolism}	{At4g30440; KOG1371 UDP-glucose 4-epimerase/UDP-sulfoquinovose synthase M Cell wall/membrane/envelope biogenesis ;}	{GO:0006694; steroid biosynthetic process; biological_process GO:0008168; methyltransferase activity; molecular_function GO:0008152; NA GO:0003824; NA GO:0003854; 3-beta-hydroxy-delta5-steroid dehydrogenase activity; molecular_function GO:0050662; coenzyme binding; molecular_function GO:0016616; oxidoreductase activity, acting on the CH-OH group of donors, NAD or NADP as acceptor; molecular_funct…	{XM_010689378.2; PREDICTED: Beta vulgaris subsp. vulgaris UDP-glucuronate 4-epimerase 1 (LOC104901768), mRNA}	{PF08241:Methyltransferase domain PF00056:lactate/malate dehydrogenase, NAD binding domain PF01073:3-beta hydroxysteroid dehydrogenase/isomerase family PF01370:NAD dependent epimerase/dehydratase family}
transcript_HQ_BAB_transcript17286/f2p0/1769	-0.61686	0.0025684	0.0055514	{NP_181187.1; Aldolase superfamily protein [Arabidopsis thaliana]}	{sp|Q9SJQ9|ALFC6_ARATH; Fructose-bisphosphate aldolase 6, cytosolic OS=Arabidopsis thaliana GN=FAB6 PE=1 SV=1}	{thj:104805087; K01623 ALDO fructose-bisphosphate aldolase, class I 4.1.2.13 ko01200; Metabolism; Global and overview maps; Carbon metabolism | ko01230; Metabolism; Global and overview maps; Biosynthesis of amino acids | ko00010; Metabolism; Carbohydrate metabolism; Glycolysis / Gluconeogenesis | ko00030; Metabolism; Carbohydrate metabolism; Pentose phosphate pathway | ko00051; Metabolism; Carboh…	{At2g36460; KOG1557 Fructose-biphosphate aldolase G Carbohydrate transport and metabolism ;}	{GO:0004332; fructose-bisphosphate aldolase activity; molecular_function GO:0006096; glycolysis; biological_process}	{NA}	{PF00274:Fructose-bisphosphate aldolase class-I}
transcript_HQ_BAB_transcript17089/f4p0/1776	0.40715	1.8025e-07	6.1474e-07	{KNA20362.1; hypothetical protein SOVF_053180 [Spinacia oleracea]}	{sp|Q9SYG7|AL7B4_ARATH; Aldehyde dehydrogenase family 7 member B4 OS=Arabidopsis thaliana GN=ALDH7B4 PE=2 SV=3}	{pop:POPTR_0001s16730g; K14085 ALDH7A1 aldehyde dehydrogenase family 7 member A1 [EC:1.2.1.31 1.2.1.8 1.2.1.3] 1.2.1.31,1.2.1.8,1.2.1.3 ko01230; Metabolism; Global and overview maps; Biosynthesis of amino acids | ko00010; Metabolism; Carbohydrate metabolism; Glycolysis / gluconeogenesis | ko00053; Metabolism; Carbohydrate metabolism; Ascorbate and aldarate metabolism | ko00620; Metabolism; Carboh…	{At1g54100; KOG2453 Aldehyde dehydrogenase C Energy production and conversion ;}	{GO:0055114; oxidation-reduction process; biological_process GO:0016491; oxidoreductase activity; molecular_function GO:0008152; NA}	{XM_010686999.2; PREDICTED: Beta vulgaris subsp. vulgaris aldehyde dehydrogenase family 7 member B4 (LOC104899742), mRNA}	{PF00171:Aldehyde dehydrogenase family}
transcript_HQ_BAB_transcript17054/f2p0/1788	1.301	3.107e-62	5.3283e-61	{XP_010680759.1; PREDICTED: chitotriosidase-1 [Beta vulgaris subsp. vulgaris]}	{sp|Q95M17|CHIA_BOVIN; Acidic mammalian chitinase OS=Bos taurus GN=CHIA PE=1 SV=1}	{ini:109177059; K01183 E3.2.1.14 chitinase 3.2.1.14 ko00520; Metabolism; Carbohydrate metabolism; Amino sugar and nucleotide sugar metabolism}	{At4g19810; KOG2806 Chitinase G Carbohydrate transport and metabolism ;}	{GO:0005975; carbohydrate metabolic process; biological_process GO:0004553; hydrolase activity, hydrolyzing O-glycosyl compounds; molecular_function}	{XM_010682457.2; PREDICTED: Beta vulgaris subsp. vulgaris chitotriosidase-1 (LOC104895832), mRNA}	{PF00704:Glycosyl hydrolases family 18}
transcript_HQ_BAB_transcript16954/f2p0/1800	-0.23749	0.011141	0.02161	{KNA16834.1; hypothetical protein SOVF_084960 [Spinacia oleracea]}	{sp|Q9LZI2|UXS2_ARATH; UDP-glucuronic acid decarboxylase 2 OS=Arabidopsis thaliana GN=UXS2 PE=1 SV=1}	{cam:101492419; K08678 UXS1, uxs UDP-glucuronate decarboxylase 4.1.1.35 ko00520; Metabolism; Carbohydrate metabolism; Amino sugar and nucleotide sugar metabolism}	{At3g62830; KOG1429 dTDP-glucose 4-6-dehydratase/UDP-glucuronic acid decarboxylase GM Carbohydrate transport and metabolism ; Cell wall/membrane/envelope biogenesis ;}	{GO:0016616; oxidoreductase activity, acting on the CH-OH group of donors, NAD or NADP as acceptor; molecular_function GO:0003854; 3-beta-hydroxy-delta5-steroid dehydrogenase activity; molecular_function GO:0006694; steroid biosynthetic process; biological_process GO:0050662; coenzyme binding; molecular_function GO:0055114; oxidation-reduction process; biological_process GO:0003824; NA}	{XM_010686223.2; PREDICTED: Beta vulgaris subsp. vulgaris UDP-glucuronic acid decarboxylase 2 (LOC104899089), mRNA}	{PF01073:3-beta hydroxysteroid dehydrogenase/isomerase family PF01370:NAD dependent epimerase/dehydratase family}
transcript_HQ_BAB_transcript16944/f3p0/1783	0.60303	1.1618e-23	8.6953e-23	{XP_010680759.1; PREDICTED: chitotriosidase-1 [Beta vulgaris subsp. vulgaris]}	{sp|Q13231|CHIT1_HUMAN; Chitotriosidase-1 OS=Homo sapiens GN=CHIT1 PE=1 SV=1}	{ini:109177055; K01183 E3.2.1.14 chitinase 3.2.1.14 ko00520; Metabolism; Carbohydrate metabolism; Amino sugar and nucleotide sugar metabolism}	{At4g19810; KOG2806 Chitinase G Carbohydrate transport and metabolism ;}	{GO:0005975; carbohydrate metabolic process; biological_process GO:0004553; hydrolase activity, hydrolyzing O-glycosyl compounds; molecular_function}	{NA}	{PF00704:Glycosyl hydrolases family 18}
transcript_HQ_BAB_transcript16939/f2p0/1827	-0.83167	1.0233e-16	5.8993e-16	{KNA20362.1; hypothetical protein SOVF_053180 [Spinacia oleracea]}	{sp|Q9SYG7|AL7B4_ARATH; Aldehyde dehydrogenase family 7 member B4 OS=Arabidopsis thaliana GN=ALDH7B4 PE=2 SV=3}	{pop:POPTR_0001s16730g; K14085 ALDH7A1 aldehyde dehydrogenase family 7 member A1 [EC:1.2.1.31 1.2.1.8 1.2.1.3] 1.2.1.31,1.2.1.8,1.2.1.3 ko01230; Metabolism; Global and overview maps; Biosynthesis of amino acids | ko00010; Metabolism; Carbohydrate metabolism; Glycolysis / gluconeogenesis | ko00053; Metabolism; Carbohydrate metabolism; Ascorbate and aldarate metabolism | ko00620; Metabolism; Carboh…	{At1g54100; KOG2453 Aldehyde dehydrogenase C Energy production and conversion ;}	{GO:0055114; oxidation-reduction process; biological_process GO:0008152; NA GO:0016491; oxidoreductase activity; molecular_function}	{XM_010686999.2; PREDICTED: Beta vulgaris subsp. vulgaris aldehyde dehydrogenase family 7 member B4 (LOC104899742), mRNA}	{PF00171:Aldehyde dehydrogenase family}
transcript_HQ_BAB_transcript16892/f2p0/1811	1.0467	1.5079e-12	7.1497e-12	{KNA25153.1; hypothetical protein SOVF_008790 [Spinacia oleracea]}	{sp|B8AVF0|BGL12_ORYSI; Beta-glucosidase 12 OS=Oryza sativa subsp. indica GN=BGLU12 PE=3 SV=1}	{bvg:104889926; K01188 E3.2.1.21 beta-glucosidase 3.2.1.21 ko00500; Metabolism; Carbohydrate metabolism; Starch and sucrose metabolism | ko00460; Metabolism; Metabolism of other amino acids; Cyanoamino acid metabolism | ko00940; Metabolism; Biosynthesis of other secondary metabolites; Phenylpropanoid biosynthesis}	{At5g42260; KOG0626 Beta-glucosidase, lactase phlorizinhydrolase, and related proteins G Carbohydrate transport and metabolism ;}	{GO:0005975; carbohydrate metabolic process; biological_process GO:0004553; hydrolase activity, hydrolyzing O-glycosyl compounds; molecular_function}	{XM_010675265.2; PREDICTED: Beta vulgaris subsp. vulgaris beta-glucosidase 13 (LOC104889926), transcript variant X1, mRNA}	{PF00232:Glycosyl hydrolase family 1}
transcript_HQ_BAB_transcript16856/f2p0/1820	0.22759	9.7856e-10	3.9039e-09	{XP_010683886.1; PREDICTED: enolase [Beta vulgaris subsp. vulgaris]}	{sp|Q43130|ENO_MESCR; Enolase OS=Mesembryanthemum crystallinum GN=PGH1 PE=2 SV=1}	{egr:104438557; K01689 ENO, eno enolase 4.2.1.11 ko01200; Metabolism; Global and overview maps; Carbon metabolism | ko01230; Metabolism; Global and overview maps; Biosynthesis of amino acids | ko00010; Metabolism; Carbohydrate metabolism; Glycolysis / gluconeogenesis | ko00680; Metabolism; Energy metabolism; Methane metabolism | ko03018; Genetic Information Processing; Folding, sorting and degrad…	{At2g36530; KOG2670 Enolase G Carbohydrate transport and metabolism ;}	{NA}	{XM_010685584.2; PREDICTED: Beta vulgaris subsp. vulgaris enolase (LOC104898495), mRNA}	{NA}
transcript_HQ_BAB_transcript16801/f2p0/1827	-0.60049	4.6934e-24	3.5466e-23	{KNA23727.1; hypothetical protein SOVF_021530 [Spinacia oleracea]}	{sp|A8KYS5|TAL_FRASN; Transaldolase OS=Frankia sp. (strain EAN1pec) GN=tal PE=3 SV=1}	{mdm:103452497; K00616 E2.2.1.2, talA, talB transaldolase 2.2.1.2 ko01200; Metabolism; Global and overview maps; Carbon metabolism | ko01230; Metabolism; Global and overview maps; Biosynthesis of amino acids | ko00030; Metabolism; Carbohydrate metabolism; pentose phosphate pathway}	{At5g13420; KOG2772 Transaldolase G Carbohydrate transport and metabolism ;}	{GO:0005975; carbohydrate metabolic process; biological_process}	{XM_010684330.2; PREDICTED: Beta vulgaris subsp. vulgaris hypothetical protein (LOC104897452), mRNA}	{PF00923:Transaldolase}
transcript_HQ_BAB_transcript16690/f2p0/1848	3.0039	8.8279e-126	3.1613e-124	{XP_010688511.1; PREDICTED: xylose isomerase [Beta vulgaris subsp. vulgaris]}	{sp|Q9FKK7|XYLA_ARATH; Xylose isomerase OS=Arabidopsis thaliana GN=XYLA PE=2 SV=2}	{vvi:100254769; K01805 xylA xylose isomerase 5.3.1.5 ko00040; Metabolism; Carbohydrate metabolism; Pentose and glucuronate interconversions | ko00051; Metabolism; Carbohydrate metabolism; Fructose and mannose metabolism}	{NA}	{NA}	{XM_010690209.2; PREDICTED: Beta vulgaris subsp. vulgaris xylose isomerase (LOC104902429), mRNA}	{NA}
transcript_HQ_BAB_transcript16684/f4p0/1823	-0.37887	1.8776e-13	9.3365e-13	{XP_010688511.1; PREDICTED: xylose isomerase [Beta vulgaris subsp. vulgaris]}	{sp|Q9FKK7|XYLA_ARATH; Xylose isomerase OS=Arabidopsis thaliana GN=XYLA PE=2 SV=2}	{vvi:100254769; K01805 xylA xylose isomerase 5.3.1.5 ko00040; Metabolism; Carbohydrate metabolism; Pentose and glucuronate interconversions | ko00051; Metabolism; Carbohydrate metabolism; Fructose and mannose metabolism}	{NA}	{NA}	{XM_010690209.2; PREDICTED: Beta vulgaris subsp. vulgaris xylose isomerase (LOC104902429), mRNA}	{NA}
transcript_HQ_BAB_transcript16599/f2p0/1845	0.62458	1.3618e-07	4.6935e-07	{XP_010693410.1; PREDICTED: glyceraldehyde-3-phosphate dehydrogenase GAPCP2, chloroplastic [Beta vulgaris subsp. vulgaris]}	{sp|Q5E924|G3PP2_ARATH; Glyceraldehyde-3-phosphate dehydrogenase GAPCP2, chloroplastic OS=Arabidopsis thaliana GN=GAPCP2 PE=2 SV=1}	{mdm:103445881; K00134 GAPDH, gapA glyceraldehyde 3-phosphate dehydrogenase 1.2.1.12 ko01200; Metabolism; Global and overview maps; Carbon metabolism | ko01230; Metabolism; Global and overview maps; Biosynthesis of amino acids | ko00010; Metabolism; Carbohydrate metabolism; Glycolysis / gluconeogenesis | ko00710; Metabolism; Energy metabolism; Carbon fixation in photosynthetic organisms | ko04066…	{At1g16300; KOG0657 Glyceraldehyde 3-phosphate dehydrogenase G Carbohydrate transport and metabolism ;}	{GO:0009089; lysine biosynthetic process via diaminopimelate; biological_process GO:0055114; oxidation-reduction process; biological_process GO:0008839; dihydrodipicolinate reductase activity; molecular_function GO:0051287; NAD binding; molecular_function GO:0016620; oxidoreductase activity, acting on the aldehyde or oxo group of donors, NAD or NADP as acceptor; molecular_function}	{XM_010695108.2; PREDICTED: Beta vulgaris subsp. vulgaris glyceraldehyde-3-phosphate dehydrogenase GAPCP2, chloroplastic (LOC104906366), mRNA}	{PF02800:Glyceraldehyde 3-phosphate dehydrogenase, C-terminal domain PF01113:Dihydrodipicolinate reductase, N-terminus PF02826:D-isomer specific 2-hydroxyacid dehydrogenase, NAD binding domain PF00044:Glyceraldehyde 3-phosphate dehydrogenase, NAD binding domain}
transcript_HQ_BAB_transcript16564/f2p0/1857	0.50882	8.0379e-08	2.8196e-07	{XP_010669397.1; PREDICTED: UDP-sulfoquinovose synthase, chloroplastic [Beta vulgaris subsp. vulgaris]}	{sp|Q84KI6|SQD1_SPIOL; UDP-sulfoquinovose synthase, chloroplastic OS=Spinacia oleracea GN=SQD1 PE=1 SV=1}	{bvg:104886625; K06118 SQD1, sqdB UDP-sulfoquinovose synthase 3.13.1.1 ko00520; Metabolism; Carbohydrate metabolism; Amino sugar and nucleotide sugar metabolism | ko00561; Metabolism; Lipid metabolism; Glycerolipid metabolism}	{At4g33030; KOG1371 UDP-glucose 4-epimerase/UDP-sulfoquinovose synthase M Cell wall/membrane/envelope biogenesis ;}	{GO:0016301; kinase activity; molecular_function GO:0003824; NA GO:0055114; oxidation-reduction process; biological_process GO:0050662; coenzyme binding; molecular_function GO:0016491; oxidoreductase activity; molecular_function}	{AY192559.1; Spinacia oleracea UDP-sulfoquinovose synthase SQD1 mRNA, complete cds}	{PF01370:NAD dependent epimerase/dehydratase family PF07992:Pyridine nucleotide-disulphide oxidoreductase PF00781:Diacylglycerol kinase catalytic domain}
transcript_HQ_BAB_transcript16295/f2p0/1890	-0.55367	0.0015333	0.0034252	{XP_010665884.1; PREDICTED: hexokinase-1 [Beta vulgaris subsp. vulgaris]}	{sp|Q9SQ76|HXK2_SOLTU; Hexokinase-2 OS=Solanum tuberosum GN=HXK2 PE=2 SV=1}	{pop:POPTR_0001s19130g; K00844 HK hexokinase 2.7.1.1 ko01200; Metabolism; Global and overview maps; Carbon metabolism | ko00010; Metabolism; Carbohydrate metabolism; Glycolysis / Gluconeogenesis | ko00051; Metabolism; Carbohydrate metabolism; Fructose and mannose metabolism | ko00052; Metabolism; Carbohydrate metabolism; Galactose metabolism | ko00500; Metabolism; Carbohydrate metabolism; Starch …	{At2g19860; KOG1369 Hexokinase G Carbohydrate transport and metabolism ;}	{GO:0015936; coenzyme A metabolic process; biological_process GO:0004420; hydroxymethylglutaryl-CoA reductase (NADPH) activity; molecular_function GO:0050662; coenzyme binding; molecular_function GO:0005975; carbohydrate metabolic process; biological_process GO:0055114; oxidation-reduction process; biological_process GO:0005524; ATP binding; molecular_function GO:0016773; phosphotransferase activ…	{XM_010667582.2; PREDICTED: Beta vulgaris subsp. vulgaris hexokinase-1 (LOC104883129), mRNA}	{PF00368:Hydroxymethylglutaryl-coenzyme A reductase PF00349:Hexokinase PF03727:Hexokinase}
transcript_HQ_BAB_transcript16272/f2p0/1894	-2.2035	3.2837e-172	1.6441e-170	{ANW09819.1; phosphoenolpyruvate carboxykinase [Malus domestica]}	{sp|Q9XFA2|PCKA2_UROPA; Phosphoenolpyruvate carboxykinase (ATP) 2 OS=Urochloa panicoides GN=PCK2 PE=2 SV=1}	{pper:PRUPE_ppa003487mg; K01610 E4.1.1.49, pckA phosphoenolpyruvate carboxykinase (ATP) 4.1.1.49 ko01200; Metabolism; Global and overview maps; Carbon metabolism | ko00010; Metabolism; Carbohydrate metabolism; Glycolysis / gluconeogenesis | ko00020; Metabolism; Carbohydrate metabolism; Citrate cycle (TCA cycle) | ko00620; Metabolism; Carbohydrate metabolism; Pyruvate metabolism | ko00710; Metabol…	{NA}	{GO:0004612; phosphoenolpyruvate carboxykinase (ATP) activity; molecular_function GO:0005524; ATP binding; molecular_function GO:0006094; gluconeogenesis; biological_process}	{XM_010684762.2; PREDICTED: Beta vulgaris subsp. vulgaris phosphoenolpyruvate carboxykinase [ATP] (LOC104897815), mRNA}	{PF01293:Phosphoenolpyruvate carboxykinase}
transcript_HQ_BAB_transcript16249/f2p0/1887	0.36549	9.9259e-06	2.8922e-05	{XP_010689353.1; PREDICTED: glucose-1-phosphate adenylyltransferase small subunit, chloroplastic/amyloplastic [Beta vulgaris subsp. vulgaris]}	{sp|Q9M462|GLGS_BRANA; Glucose-1-phosphate adenylyltransferase small subunit, chloroplastic OS=Brassica napus GN=AGPS1 PE=2 SV=1}	{rcu:8288319; K00975 glgC glucose-1-phosphate adenylyltransferase 2.7.7.27 ko00500; Metabolism; Carbohydrate metabolism; Starch and sucrose metabolism | ko00520; Metabolism; Carbohydrate metabolism; Amino sugar and nucleotide sugar metabolism | ko02026; Cellular Processes; Cellular community - prokaryotes; Biofilm formation - Escherichia coli}	{At5g48300; KOG1322 GDP-mannose pyrophosphorylase/mannose-1-phosphate guanylyltransferase M Cell wall/membrane/envelope biogenesis ;}	{GO:0016779; nucleotidyltransferase activity; molecular_function GO:0009058; biosynthetic process; biological_process}	{XM_010691051.2; PREDICTED: Beta vulgaris subsp. vulgaris glucose-1-phosphate adenylyltransferase small subunit, chloroplastic/amyloplastic (LOC104903071), mRNA}	{PF00483:Nucleotidyl transferase}
transcript_HQ_BAB_transcript16166/f2p0/1889	-0.6202	1.2415e-06	3.9516e-06	{XP_010667722.1; PREDICTED: polygalacturonate 4-alpha-galacturonosyltransferase [Beta vulgaris subsp. vulgaris]}	{sp|Q9LE59|GAUT1_ARATH; Polygalacturonate 4-alpha-galacturonosyltransferase OS=Arabidopsis thaliana GN=GAUT1 PE=1 SV=1}	{sly:101268802; K13648 GAUT alpha-1,4-galacturonosyltransferase 2.4.1.43 ko00520; Metabolism; Carbohydrate metabolism; Amino sugar and nucleotide sugar metabolism}	{NA}	{GO:0016757; transferase activity, transferring glycosyl groups; molecular_function}	{XM_010669420.2; PREDICTED: Beta vulgaris subsp. vulgaris polygalacturonate 4-alpha-galacturonosyltransferase (LOC104884733), mRNA}	{PF01501:Glycosyl transferase family 8}
transcript_HQ_BAB_transcript15997/f2p0/1913	2.2557	5.6409e-87	1.3988e-85	{KNA23727.1; hypothetical protein SOVF_021530 [Spinacia oleracea]}	{sp|A8KYS5|TAL_FRASN; Transaldolase OS=Frankia sp. (strain EAN1pec) GN=tal PE=3 SV=1}	{mdm:103452497; K00616 E2.2.1.2, talA, talB transaldolase 2.2.1.2 ko01200; Metabolism; Global and overview maps; Carbon metabolism | ko01230; Metabolism; Global and overview maps; Biosynthesis of amino acids | ko00030; Metabolism; Carbohydrate metabolism; pentose phosphate pathway}	{At5g13420; KOG2772 Transaldolase G Carbohydrate transport and metabolism ;}	{GO:0005975; carbohydrate metabolic process; biological_process}	{XM_010684330.2; PREDICTED: Beta vulgaris subsp. vulgaris hypothetical protein (LOC104897452), mRNA}	{PF00923:Transaldolase}
transcript_HQ_BAB_transcript15920/f3p0/1894	0.94871	0.0014871	0.0033302	{KNA22221.1; hypothetical protein SOVF_036210 [Spinacia oleracea]}	{sp|Q9SCP2|PLY12_ARATH; Probable pectate lyase 12 OS=Arabidopsis thaliana GN=At3g53190 PE=2 SV=2}	{ini:109149186; K01728 pel pectate lyase 4.2.2.2 ko00040; Metabolism; Carbohydrate metabolism; Pentose and glucuronate interconversions | ko02024; Cellular Processes; Cellular community - prokaryotes; Quorum sensing}	{NA}	{NA}	{XM_010698001.2; PREDICTED: Beta vulgaris subsp. vulgaris probable pectate lyase 12 (LOC104908838), mRNA}	{NA}
transcript_HQ_BAB_transcript15854/f2p0/1937	1.4011	5.7871e-240	4.5118e-238	{XP_010688887.1; PREDICTED: UDP-glucose 6-dehydrogenase 1 [Beta vulgaris subsp. vulgaris]}	{sp|Q96558|UGDH1_SOYBN; UDP-glucose 6-dehydrogenase 1 OS=Glycine max GN=UGD1 PE=2 SV=1}	{thj:104805508; K00012 UGDH, ugd UDPglucose 6-dehydrogenase 1.1.1.22 ko00040; Metabolism; Carbohydrate metabolism; Pentose and glucuronate interconversions | ko00053; Metabolism; Carbohydrate metabolism; Ascorbate and aldarate metabolism | ko00520; Metabolism; Carbohydrate metabolism; Amino sugar and nucleotide sugar metabolism}	{At5g15490; KOG2666 UDP-glucose/GDP-mannose dehydrogenase GT Carbohydrate transport and metabolism ; Signal transduction mechanisms ;}	{GO:0016616; oxidoreductase activity, acting on the CH-OH group of donors, NAD or NADP as acceptor; molecular_function GO:0055114; oxidation-reduction process; biological_process GO:0051287; NAD binding; molecular_function GO:0004616; phosphogluconate dehydrogenase (decarboxylating) activity; molecular_function}	{XM_010690585.2; PREDICTED: Beta vulgaris subsp. vulgaris UDP-glucose 6-dehydrogenase 1 (LOC104902705), transcript variant X1, mRNA}	{PF03446:NAD binding domain of 6-phosphogluconate dehydrogenase PF03721:UDP-glucose/GDP-mannose dehydrogenase family, NAD binding domain PF00984:UDP-glucose/GDP-mannose dehydrogenase family, central domain PF03720:UDP-glucose/GDP-mannose dehydrogenase family, UDP binding domain}
transcript_HQ_BAB_transcript15821/f5p0/1923	0.52427	5.9651e-21	4.055e-20	{KNA03415.1; hypothetical protein SOVF_209440 [Spinacia oleracea]}	{sp|P31023|DLDH_PEA; Dihydrolipoyl dehydrogenase, mitochondrial OS=Pisum sativum GN=LPD PE=1 SV=2}	{bvg:104889141; K00382 DLD, lpd, pdhD dihydrolipoamide dehydrogenase 1.8.1.4 ko01200; Metabolism; Global and overview maps; Carbon metabolism | ko00010; Metabolism; Carbohydrate metabolism; Glycolysis / gluconeogenesis | ko00020; Metabolism; Carbohydrate metabolism; Citrate cycle (TCA cycle) | ko00620; Metabolism; Carbohydrate metabolism; Pyruvate metabolism | ko00630; Metabolism; Carbohydrate me…	{At1g48030; KOG1335 Dihydrolipoamide dehydrogenase C Energy production and conversion ;}	{GO:0051287; NAD binding; molecular_function GO:0050660; flavin adenine dinucleotide binding; molecular_function GO:0071949; FAD binding; molecular_function GO:0045454; cell redox homeostasis; biological_process GO:0016616; oxidoreductase activity, acting on the CH-OH group of donors, NAD or NADP as acceptor; molecular_function GO:0008033; tRNA processing; biological_process GO:0016491; oxidoredu…	{XM_010674294.2; PREDICTED: Beta vulgaris subsp. vulgaris dihydrolipoyl dehydrogenase, mitochondrial (LOC104889141), mRNA}	{PF02852:Pyridine nucleotide-disulphide oxidoreductase, dimerisation domain PF01266:FAD dependent oxidoreductase PF12831:FAD dependent oxidoreductase PF07992:Pyridine nucleotide-disulphide oxidoreductase PF01494:FAD binding domain PF00070:Pyridine nucleotide-disulphide oxidoreductase PF01593:Flavin containing amine oxidoreductase PF01134:Glucose inhibited division protein A PF03721:UDP-glucose/GD…
transcript_HQ_BAB_transcript15816/f10p0/1895	-2.1296	1.0799e-143	4.5001e-142	{XP_019106732.1; PREDICTED: glucose-1-phosphate adenylyltransferase large subunit, chloroplastic/amyloplastic isoform X1 [Beta vulgaris subsp. vulgaris]}	{sp|P55233|GLGL1_BETVU; Glucose-1-phosphate adenylyltransferase large subunit, chloroplastic/amyloplastic OS=Beta vulgaris GN=AGPS1 PE=2 SV=1}	{pop:POPTR_0002s03480g; K00975 glgC glucose-1-phosphate adenylyltransferase 2.7.7.27 ko00500; Metabolism; Carbohydrate metabolism; Starch and sucrose metabolism | ko00520; Metabolism; Carbohydrate metabolism; Amino sugar and nucleotide sugar metabolism | ko02026; Cellular Processes; Cellular community - prokaryotes; Biofilm formation - Escherichia coli}	{At1g27680; KOG1322 GDP-mannose pyrophosphorylase/mannose-1-phosphate guanylyltransferase M Cell wall/membrane/envelope biogenesis ;}	{GO:0016779; nucleotidyltransferase activity; molecular_function GO:0009058; biosynthetic process; biological_process}	{XM_019251187.1; PREDICTED: Beta vulgaris subsp. vulgaris glucose-1-phosphate adenylyltransferase large subunit, chloroplastic/amyloplastic (LOC104889614), transcript variant X1, mRNA}	{PF00483:Nucleotidyl transferase}
transcript_HQ_BAB_transcript15746/f3p0/1943	0.31115	6.2443e-14	3.1729e-13	{KNA05271.1; hypothetical protein SOVF_191970 [Spinacia oleracea]}	{sp|O23553|BAM3_ARATH; Beta-amylase 3, chloroplastic OS=Arabidopsis thaliana GN=BAM3 PE=1 SV=3}	{pop:POPTR_0003s03330g; K01177 E3.2.1.2 Beta-amylase 3.2.1.2 ko00500; Metabolism; Carbohydrate metabolism; Starch and sucrose metabolism}	{NA}	{GO:0016161; Beta-amylase activity; molecular_function GO:0000272; polysaccharide catabolic process; biological_process}	{XM_010697150.2; PREDICTED: Beta vulgaris subsp. vulgaris Beta-amylase 3, chloroplastic (LOC104908081), mRNA}	{PF01373:Glycosyl hydrolase family 14}
transcript_HQ_BAB_transcript15607/f14p0/1908	-0.41572	3.4858e-11	1.5279e-10	{XP_010685225.1; PREDICTED: UDP-glucose 6-dehydrogenase 5 [Beta vulgaris subsp. vulgaris]}	{sp|Q2QS13|UGDH5_ORYSJ; UDP-glucose 6-dehydrogenase 5 OS=Oryza sativa subsp. japonica GN=UGD5 PE=2 SV=1}	{vvi:100261061; K00012 UGDH, ugd UDPglucose 6-dehydrogenase 1.1.1.22 ko00040; Metabolism; Carbohydrate metabolism; Pentose and glucuronate interconversions | ko00053; Metabolism; Carbohydrate metabolism; Ascorbate and aldarate metabolism | ko00520; Metabolism; Carbohydrate metabolism; Amino sugar and nucleotide sugar metabolism}	{At5g15490; KOG2666 UDP-glucose/GDP-mannose dehydrogenase GT Carbohydrate transport and metabolism ; Signal transduction mechanisms ;}	{GO:0055114; oxidation-reduction process; biological_process GO:0004616; phosphogluconate dehydrogenase (decarboxylating) activity; molecular_function GO:0051287; NAD binding; molecular_function GO:0016616; oxidoreductase activity, acting on the CH-OH group of donors, NAD or NADP as acceptor; molecular_function}	{XM_010686923.2; PREDICTED: Beta vulgaris subsp. vulgaris UDP-glucose 6-dehydrogenase 5 (LOC104899685), mRNA}	{PF03720:UDP-glucose/GDP-mannose dehydrogenase family, UDP binding domain PF00984:UDP-glucose/GDP-mannose dehydrogenase family, central domain PF03721:UDP-glucose/GDP-mannose dehydrogenase family, NAD binding domain PF03446:NAD binding domain of 6-phosphogluconate dehydrogenase}
transcript_HQ_BAB_transcript15604/f3p0/1940	-0.65462	3.034e-07	1.0159e-06	{KNA23727.1; hypothetical protein SOVF_021530 [Spinacia oleracea]}	{sp|A8KYS5|TAL_FRASN; Transaldolase OS=Frankia sp. (strain EAN1pec) GN=tal PE=3 SV=1}	{mdm:103452497; K00616 E2.2.1.2, talA, talB transaldolase 2.2.1.2 ko01200; Metabolism; Global and overview maps; Carbon metabolism | ko01230; Metabolism; Global and overview maps; Biosynthesis of amino acids | ko00030; Metabolism; Carbohydrate metabolism; pentose phosphate pathway}	{At5g13420; KOG2772 Transaldolase G Carbohydrate transport and metabolism ;}	{GO:0005975; carbohydrate metabolic process; biological_process}	{XM_010684330.2; PREDICTED: Beta vulgaris subsp. vulgaris hypothetical protein (LOC104897452), mRNA}	{PF00923:Transaldolase}
transcript_HQ_BAB_transcript15524/f3p0/1963	2.074	1.8106e-12	8.5487e-12	{XP_010678396.1; PREDICTED: enolase 1, chloroplastic [Beta vulgaris subsp. vulgaris]}	{sp|Q9C9C4|ENO1_ARATH; Enolase 1, chloroplastic OS=Arabidopsis thaliana GN=ENO1 PE=1 SV=1}	{bvg:104893952; K01689 ENO, eno enolase 4.2.1.11 ko01200; Metabolism; Global and overview maps; Carbon metabolism | ko01230; Metabolism; Global and overview maps; Biosynthesis of amino acids | ko00010; Metabolism; Carbohydrate metabolism; Glycolysis / gluconeogenesis | ko00680; Metabolism; Energy metabolism; Methane metabolism | ko03018; Genetic Information Processing; Folding, sorting and degrad…	{At1g74030; KOG2670 Enolase G Carbohydrate transport and metabolism ;}	{NA}	{XM_010680094.2; PREDICTED: Beta vulgaris subsp. vulgaris enolase 1, chloroplastic (LOC104893952), mRNA}	{NA}
transcript_HQ_BAB_transcript15491/f2p0/1979	-0.34537	9.1157e-06	2.6624e-05	{KNA19235.1; hypothetical protein SOVF_063380 [Spinacia oleracea]}	{sp|F4IW47|TKTC2_ARATH; Transketolase-2, chloroplastic OS=Arabidopsis thaliana GN=TKL-2 PE=1 SV=1}	{nnu:104611478; K00615 E2.2.1.1, tktA, tktB transketolase 2.2.1.1 ko01200; Metabolism; Global and overview maps; Carbon metabolism | ko01230; Metabolism; Global and overview maps; Biosynthesis of amino acids | ko00030; Metabolism; Carbohydrate metabolism; pentose phosphate pathway | ko00710; Metabolism; Energy metabolism; Carbon fixation in photosynthetic organisms | ko01051; Metabolism; Metaboli…	{At2g45290; KOG0523 Transketolase G Carbohydrate transport and metabolism ;}	{GO:0008661; 1-deoxy-D-xylulose-5-phosphate synthase activity; molecular_function GO:0005975; carbohydrate metabolic process; biological_process GO:0016832; aldehyde-lyase activity; molecular_function GO:0016114; terpenoid biosynthetic process; biological_process}	{XM_010694658.2; PREDICTED: Beta vulgaris subsp. vulgaris transketolase, chloroplastic (LOC104905987), mRNA}	{PF09363:XFP C-terminal domain PF13292:1-deoxy-D-xylulose-5-phosphate synthase}
transcript_HQ_BAB_transcript15487/f4p0/1953	-0.50766	3.2842e-07	1.0965e-06	{XP_010683420.1; PREDICTED: 2,3-bisphosphoglycerate-independent phosphoglycerate mutase [Beta vulgaris subsp. vulgaris]}	{sp|Q42908|PMGI_MESCR; 2,3-bisphosphoglycerate-independent phosphoglycerate mutase OS=Mesembryanthemum crystallinum GN=PGM1 PE=2 SV=1}	{bvg:104882799; K15633 gpmI 2,3-bisphosphoglycerate-independent phosphoglycerate mutase 5.4.2.12 ko01200; Metabolism; Global and overview maps; Carbon metabolism | ko01230; Metabolism; Global and overview maps; Biosynthesis of amino acids | ko00010; Metabolism; Carbohydrate metabolism; Glycolysis / gluconeogenesis | ko00680; Metabolism; Energy metabolism; Methane metabolism | ko00260; Metabolism;…	{At3g08590; KOG4513 Phosphoglycerate mutase G Carbohydrate transport and metabolism ;}	{GO:0030145; manganese ion binding; molecular_function GO:0005737; cytoplasm; cellular_component GO:0004619; phosphoglycerate mutase activity; molecular_function GO:0008152; NA GO:0006007; glucose catabolic process; biological_process GO:0016791; phosphatase activity; molecular_function GO:0003824; NA GO:0046872; metal ion binding; molecular_function}	{XM_010685118.2; PREDICTED: Beta vulgaris subsp. vulgaris 2,3-bisphosphoglycerate-independent phosphoglycerate mutase (LOC104898105), mRNA}	{PF06415:BPG-independent PGAM N-terminus (iPGM_N) PF01676:Metalloenzyme superfamily PF00245:Alkaline phosphatase}
transcript_HQ_BAB_transcript15200/f4p0/1981	#NAME?	2.2794e-23	1.685e-22	{XP_010683420.1; PREDICTED: 2,3-bisphosphoglycerate-independent phosphoglycerate mutase [Beta vulgaris subsp. vulgaris]}	{sp|Q42908|PMGI_MESCR; 2,3-bisphosphoglycerate-independent phosphoglycerate mutase OS=Mesembryanthemum crystallinum GN=PGM1 PE=2 SV=1}	{bvg:104882799; K15633 gpmI 2,3-bisphosphoglycerate-independent phosphoglycerate mutase 5.4.2.12 ko01200; Metabolism; Global and overview maps; Carbon metabolism | ko01230; Metabolism; Global and overview maps; Biosynthesis of amino acids | ko00010; Metabolism; Carbohydrate metabolism; Glycolysis / gluconeogenesis | ko00680; Metabolism; Energy metabolism; Methane metabolism | ko00260; Metabolism;…	{At3g08590; KOG4513 Phosphoglycerate mutase G Carbohydrate transport and metabolism ;}	{GO:0016791; phosphatase activity; molecular_function GO:0008152; NA GO:0004619; phosphoglycerate mutase activity; molecular_function GO:0006007; glucose catabolic process; biological_process GO:0046872; metal ion binding; molecular_function GO:0003824; NA GO:0005737; cytoplasm; cellular_component GO:0030145; manganese ion binding; molecular_function}	{XM_019248139.1; PREDICTED: Beta vulgaris subsp. vulgaris 2,3-bisphosphoglycerate-independent phosphoglycerate mutase (LOC104882799), transcript variant X2, mRNA}	{PF00245:Alkaline phosphatase PF01676:Metalloenzyme superfamily PF06415:BPG-independent PGAM N-terminus (iPGM_N)}
transcript_HQ_BAB_transcript15183/f9p0/1922	0.77702	2.8518e-44	3.5843e-43	{KNA04660.1; hypothetical protein SOVF_197610 [Spinacia oleracea]}	{sp|Q9SU63|AL2B4_ARATH; Aldehyde dehydrogenase family 2 member B4, mitochondrial OS=Arabidopsis thaliana GN=ALDH2B4 PE=2 SV=1}	{bvg:104894249; K00128 ALDH aldehyde dehydrogenase (NAD+) 1.2.1.3 ko00010; Metabolism; Carbohydrate metabolism; Glycolysis / gluconeogenesis | ko00053; Metabolism; Carbohydrate metabolism; Ascorbate and aldarate metabolism | ko00620; Metabolism; Carbohydrate metabolism; Pyruvate metabolism | ko00071; Metabolism; Lipid metabolism; Fatty acid degradation | ko00561; Metabolism; Lipid metabolism; Gly…	{At3g48000; KOG2450 Aldehyde dehydrogenase C Energy production and conversion ;}	{GO:0008152; NA GO:0016491; oxidoreductase activity; molecular_function GO:0055114; oxidation-reduction process; biological_process}	{XM_010680436.2; PREDICTED: Beta vulgaris subsp. vulgaris aldehyde dehydrogenase family 2 member B4, mitochondrial (LOC104894249), mRNA}	{PF00171:Aldehyde dehydrogenase family}
transcript_HQ_BAB_transcript15008/f3p0/2009	1.6019	5.3826e-28	4.5435e-27	{XP_010683420.1; PREDICTED: 2,3-bisphosphoglycerate-independent phosphoglycerate mutase [Beta vulgaris subsp. vulgaris]}	{sp|Q42908|PMGI_MESCR; 2,3-bisphosphoglycerate-independent phosphoglycerate mutase OS=Mesembryanthemum crystallinum GN=PGM1 PE=2 SV=1}	{bvg:104882799; K15633 gpmI 2,3-bisphosphoglycerate-independent phosphoglycerate mutase 5.4.2.12 ko01200; Metabolism; Global and overview maps; Carbon metabolism | ko01230; Metabolism; Global and overview maps; Biosynthesis of amino acids | ko00010; Metabolism; Carbohydrate metabolism; Glycolysis / gluconeogenesis | ko00680; Metabolism; Energy metabolism; Methane metabolism | ko00260; Metabolism;…	{At3g08590; KOG4513 Phosphoglycerate mutase G Carbohydrate transport and metabolism ;}	{GO:0003824; NA GO:0046872; metal ion binding; molecular_function GO:0006007; glucose catabolic process; biological_process GO:0004619; phosphoglycerate mutase activity; molecular_function GO:0008152; NA GO:0016791; phosphatase activity; molecular_function GO:0030145; manganese ion binding; molecular_function GO:0005737; cytoplasm; cellular_component}	{XM_010685118.2; PREDICTED: Beta vulgaris subsp. vulgaris 2,3-bisphosphoglycerate-independent phosphoglycerate mutase (LOC104898105), mRNA}	{PF06415:BPG-independent PGAM N-terminus (iPGM_N) PF00245:Alkaline phosphatase PF01676:Metalloenzyme superfamily}
transcript_HQ_BAB_transcript14943/f6p0/1945	-0.53292	1.2478e-10	5.2951e-10	{Q94KU1.1; RecName: Full=6-phosphogluconate dehydrogenase, decarboxylating 1}	{sp|Q94KU1|6PGD1_SPIOL; 6-phosphogluconate dehydrogenase, decarboxylating 1 OS=Spinacia oleracea GN=pgdC PE=1 SV=1}	{vvi:100246134; K00033 PGD, gnd, gntZ 6-phosphogluconate dehydrogenase [EC:1.1.1.44 1.1.1.343] 1.1.1.44,1.1.1.343 ko01200; Metabolism; Global and overview maps; Carbon metabolism | ko00030; Metabolism; Carbohydrate metabolism; pentose phosphate pathway | ko00480; Metabolism; Metabolism of other amino acids; Glutathione metabolism}	{At3g02360; KOG2653 6-phosphogluconate dehydrogenase G Carbohydrate transport and metabolism ;}	{GO:0004616; phosphogluconate dehydrogenase (decarboxylating) activity; molecular_function GO:0006631; fatty acid metabolic process; biological_process GO:0003857; 3-hydroxyacyl-CoA dehydrogenase activity; molecular_function GO:0055114; oxidation-reduction process; biological_process GO:0006098; pentose-phosphate shunt; biological_process GO:0016491; oxidoreductase activity; molecular_function}	{XM_010683006.2; PREDICTED: Beta vulgaris subsp. vulgaris 6-phosphogluconate dehydrogenase, decarboxylating 1 (LOC104896287), mRNA}	{PF03446:NAD binding domain of 6-phosphogluconate dehydrogenase PF02737:3-hydroxyacyl-CoA dehydrogenase, NAD binding domain PF00393:6-phosphogluconate dehydrogenase, C-terminal domain}
transcript_HQ_BAB_transcript14805/f9p0/2012	-1.3513	4.52e-19	2.867e-18	{XP_010677904.1; PREDICTED: beta-glucosidase 13 [Beta vulgaris subsp. vulgaris]}	{sp|Q7XKV4|BGL12_ORYSJ; Beta-glucosidase 12 OS=Oryza sativa subsp. japonica GN=BGLU12 PE=1 SV=2}	{bvg:104893499; K01188 E3.2.1.21 beta-glucosidase 3.2.1.21 ko00500; Metabolism; Carbohydrate metabolism; Starch and sucrose metabolism | ko00460; Metabolism; Metabolism of other amino acids; Cyanoamino acid metabolism | ko00940; Metabolism; Biosynthesis of other secondary metabolites; Phenylpropanoid biosynthesis}	{At2g44450; KOG0626 Beta-glucosidase, lactase phlorizinhydrolase, and related proteins G Carbohydrate transport and metabolism ;}	{GO:0005975; carbohydrate metabolic process; biological_process GO:0004553; hydrolase activity, hydrolyzing O-glycosyl compounds; molecular_function}	{XM_010679602.2; PREDICTED: Beta vulgaris subsp. vulgaris beta-glucosidase 13 (LOC104893499), mRNA}	{PF00150:Cellulase (glycosyl hydrolase family 5) PF00232:Glycosyl hydrolase family 1}
transcript_HQ_BAB_transcript14735/f2p0/2084	-1.0137	2.2582e-12	1.0603e-11	{KNA25764.1; hypothetical protein SOVF_003910 [Spinacia oleracea]}	{sp|Q9LIS3|GAE6_ARATH; UDP-glucuronate 4-epimerase 6 OS=Arabidopsis thaliana GN=GAE6 PE=1 SV=1}	{bvg:104889782; K08679 E5.1.3.6 UDP-glucuronate 4-epimerase 5.1.3.6 ko00520; Metabolism; Carbohydrate metabolism; Amino sugar and nucleotide sugar metabolism}	{At3g23820; KOG1371 UDP-glucose 4-epimerase/UDP-sulfoquinovose synthase M Cell wall/membrane/envelope biogenesis ;}	{GO:0003824; NA GO:0055114; oxidation-reduction process; biological_process GO:0006694; steroid biosynthetic process; biological_process GO:0050662; coenzyme binding; molecular_function GO:0003854; 3-beta-hydroxy-delta5-steroid dehydrogenase activity; molecular_function GO:0016616; oxidoreductase activity, acting on the CH-OH group of donors, NAD or NADP as acceptor; molecular_function}	{NA}	{PF01370:NAD dependent epimerase/dehydratase family PF01073:3-beta hydroxysteroid dehydrogenase/isomerase family}
transcript_HQ_BAB_transcript14720/f2p0/2025	-2.2327	1.8099e-07	6.1708e-07	{XP_010683420.1; PREDICTED: 2,3-bisphosphoglycerate-independent phosphoglycerate mutase [Beta vulgaris subsp. vulgaris]}	{sp|Q42908|PMGI_MESCR; 2,3-bisphosphoglycerate-independent phosphoglycerate mutase OS=Mesembryanthemum crystallinum GN=PGM1 PE=2 SV=1}	{bvg:104882799; K15633 gpmI 2,3-bisphosphoglycerate-independent phosphoglycerate mutase 5.4.2.12 ko01200; Metabolism; Global and overview maps; Carbon metabolism | ko01230; Metabolism; Global and overview maps; Biosynthesis of amino acids | ko00010; Metabolism; Carbohydrate metabolism; Glycolysis / gluconeogenesis | ko00680; Metabolism; Energy metabolism; Methane metabolism | ko00260; Metabolism;…	{At3g08590; KOG4513 Phosphoglycerate mutase G Carbohydrate transport and metabolism ;}	{GO:0008152; NA GO:0006007; glucose catabolic process; biological_process GO:0004619; phosphoglycerate mutase activity; molecular_function GO:0016791; phosphatase activity; molecular_function GO:0003824; NA GO:0046872; metal ion binding; molecular_function GO:0030145; manganese ion binding; molecular_function GO:0005737; cytoplasm; cellular_component}	{XM_019248139.1; PREDICTED: Beta vulgaris subsp. vulgaris 2,3-bisphosphoglycerate-independent phosphoglycerate mutase (LOC104882799), transcript variant X2, mRNA}	{PF06415:BPG-independent PGAM N-terminus (iPGM_N) PF01676:Metalloenzyme superfamily PF00245:Alkaline phosphatase}
transcript_HQ_BAB_transcript14404/f2p0/2081	0.35535	9.4335e-10	3.7663e-09	{XP_010674690.1; PREDICTED: probable UDP-arabinopyranose mutase 5 [Beta vulgaris subsp. vulgaris]}	{sp|Q9FFD2|RGP5_ARATH; Probable UDP-arabinopyranose mutase 5 OS=Arabidopsis thaliana GN=RGP5 PE=1 SV=1}	{bvg:104890796; K13379 RGP, UTM reversibly glycosylated polypeptide / UDP-arabinopyranose mutase [EC:2.4.1.- 5.4.99.30] 2.4.1.-,5.4.99.30 ko00520; Metabolism; Carbohydrate metabolism; Amino sugar and nucleotide sugar metabolism}	{NA}	{GO:0006452; translational frameshifting; biological_process GO:0016866; intramolecular transferase activity; molecular_function GO:0045901; positive regulation of translational elongation; biological_process GO:0043022; ribosome binding; molecular_function GO:0045905; positive regulation of translational termination; biological_process GO:0030244; cellulose biosynthetic process; biological_proce…	{XM_010676388.2; PREDICTED: Beta vulgaris subsp. vulgaris probable UDP-arabinopyranose mutase 5 (LOC104890796), mRNA}	{PF03214:Reversibly glycosylated polypeptide PF01287:Eukaryotic elongation factor 5A hypusine, DNA-binding OB fold}
transcript_HQ_BAB_transcript14357/f5p0/2052	0.852	7.095e-51	1.0129e-49	{KNA18336.1; hypothetical protein SOVF_071830 [Spinacia oleracea]}	{sp|P22200|KPYC_SOLTU; Pyruvate kinase, cytosolic isozyme OS=Solanum tuberosum PE=2 SV=1}	{bvg:104886630; K00873 PK, pyk pyruvate kinase 2.7.1.40 ko01200; Metabolism; Global and overview maps; Carbon metabolism | ko01230; Metabolism; Global and overview maps; Biosynthesis of amino acids | ko00010; Metabolism; Carbohydrate metabolism; Glycolysis / gluconeogenesis | ko00620; Metabolism; Carbohydrate metabolism; Pyruvate metabolism | ko00230; Metabolism; Nucleotide metabolism; Purine met…	{At5g08570; KOG2323 Pyruvate kinase G Carbohydrate transport and metabolism ;}	{GO:0000287; magnesium ion binding; molecular_function GO:0030955; potassium ion binding; molecular_function GO:0006096; glycolysis; biological_process GO:0003824; NA GO:0004743; pyruvate kinase activity; molecular_function}	{XM_010671099.2; PREDICTED: Beta vulgaris subsp. vulgaris pyruvate kinase, cytosolic isozyme (LOC104886630), transcript variant X2, mRNA}	{PF03328:HpcH/HpaI aldolase/citrate lyase family PF00224:Pyruvate kinase, barrel domain}
transcript_HQ_BAB_transcript14240/f5p0/2079	-0.41545	5.5459e-27	4.5469e-26	{KNA18336.1; hypothetical protein SOVF_071830 [Spinacia oleracea]}	{sp|P22200|KPYC_SOLTU; Pyruvate kinase, cytosolic isozyme OS=Solanum tuberosum PE=2 SV=1}	{bvg:104886630; K00873 PK, pyk pyruvate kinase 2.7.1.40 ko01200; Metabolism; Global and overview maps; Carbon metabolism | ko01230; Metabolism; Global and overview maps; Biosynthesis of amino acids | ko00010; Metabolism; Carbohydrate metabolism; Glycolysis / gluconeogenesis | ko00620; Metabolism; Carbohydrate metabolism; Pyruvate metabolism | ko00230; Metabolism; Nucleotide metabolism; Purine met…	{At5g08570; KOG2323 Pyruvate kinase G Carbohydrate transport and metabolism ;}	{GO:0006096; glycolysis; biological_process GO:0003824; NA GO:0004743; pyruvate kinase activity; molecular_function GO:0030955; potassium ion binding; molecular_function GO:0000287; magnesium ion binding; molecular_function}	{XM_010671099.2; PREDICTED: Beta vulgaris subsp. vulgaris pyruvate kinase, cytosolic isozyme (LOC104886630), transcript variant X2, mRNA}	{PF00224:Pyruvate kinase, barrel domain PF03328:HpcH/HpaI aldolase/citrate lyase family}
transcript_HQ_BAB_transcript14185/f7p0/2080	2.2657	1.173e-40	1.373e-39	{KNA20282.1; hypothetical protein SOVF_053720 isoform A [Spinacia oleracea]}	{sp|Q940Q1|PLY1_ARATH; Probable pectate lyase 1 OS=Arabidopsis thaliana GN=At1g04680 PE=2 SV=2}	{bvg:104888738; K01728 pel pectate lyase 4.2.2.2 ko00040; Metabolism; Carbohydrate metabolism; Pentose and glucuronate interconversions | ko02024; Cellular Processes; Cellular community - prokaryotes; Quorum sensing}	{NA}	{NA}	{XM_010673787.2; PREDICTED: Beta vulgaris subsp. vulgaris probable pectate lyase 1 (LOC104888738), mRNA}	{NA}
transcript_HQ_BAB_transcript14063/f5p0/2102	0.25513	0.0018121	0.0040011	{KNA16303.1; hypothetical protein SOVF_090420 [Spinacia oleracea]}	{sp|Q94AA4|PFKA3_ARATH; ATP-dependent 6-phosphofructokinase 3 OS=Arabidopsis thaliana GN=PFK3 PE=1 SV=1}	{cit:102616327; K00850 pfkA, PFK 6-phosphofructokinase 1 2.7.1.11 ko01200; Metabolism; Global and overview maps; Carbon metabolism | ko01230; Metabolism; Global and overview maps; Biosynthesis of amino acids | ko00010; Metabolism; Carbohydrate metabolism; Glycolysis / Gluconeogenesis | ko00030; Metabolism; Carbohydrate metabolism; Pentose phosphate pathway | ko00051; Metabolism; Carbohydrate meta…	{At5g56630; KOG2440 Pyrophosphate-dependent phosphofructo-1-kinase G Carbohydrate transport and metabolism ;}	{GO:0006096; glycolysis; biological_process GO:0003872; 6-phosphofructokinase activity; molecular_function GO:0016301; kinase activity; molecular_function}	{XM_010691839.2; PREDICTED: Beta vulgaris subsp. vulgaris ATP-dependent 6-phosphofructokinase 3 (LOC104903729), mRNA}	{PF00365:Phosphofructokinase PF00781:Diacylglycerol kinase catalytic domain}
transcript_HQ_BAB_transcript14006/f2p0/2101	0.74825	1.2007e-08	4.4538e-08	{KNA24526.1; hypothetical protein SOVF_014610 [Spinacia oleracea]}	{sp|Q8VZC0|UXS1_ARATH; UDP-glucuronic acid decarboxylase 1 OS=Arabidopsis thaliana GN=UXS1 PE=1 SV=1}	{pper:PRUPE_ppa005905mg; K08678 UXS1, uxs UDP-glucuronate decarboxylase 4.1.1.35 ko00520; Metabolism; Carbohydrate metabolism; Amino sugar and nucleotide sugar metabolism}	{At3g53520; KOG1429 dTDP-glucose 4-6-dehydratase/UDP-glucuronic acid decarboxylase GM Carbohydrate transport and metabolism ; Cell wall/membrane/envelope biogenesis ;}	{NA}	{XM_010685895.2; PREDICTED: Beta vulgaris subsp. vulgaris UDP-glucuronic acid decarboxylase 1 (LOC104898788), mRNA}	{NA}
transcript_HQ_BAB_transcript13923/f2p0/2103	-4.0179	4.6847e-17	2.7486e-16	{XP_019106309.1; PREDICTED: pyruvate kinase 1, cytosolic isoform X1 [Beta vulgaris subsp. vulgaris]}	{sp|Q2QXR8|KPYC2_ORYSJ; Pyruvate kinase 2, cytosolic OS=Oryza sativa subsp. japonica GN=Os12g0145700 PE=2 SV=1}	{pper:PRUPE_ppa004145mg; K00873 PK, pyk pyruvate kinase 2.7.1.40 ko01200; Metabolism; Global and overview maps; Carbon metabolism | ko01230; Metabolism; Global and overview maps; Biosynthesis of amino acids | ko00010; Metabolism; Carbohydrate metabolism; Glycolysis / gluconeogenesis | ko00620; Metabolism; Carbohydrate metabolism; Pyruvate metabolism | ko00230; Metabolism; Nucleotide metabolism; P…	{At3g52990; KOG2323 Pyruvate kinase G Carbohydrate transport and metabolism ;}	{GO:0000287; magnesium ion binding; molecular_function GO:0030955; potassium ion binding; molecular_function GO:0009231; riboflavin biosynthetic process; biological_process GO:0006096; glycolysis; biological_process GO:0008703; 5-amino-6-(5-phosphoribosylamino)uracil reductase activity; molecular_function GO:0055114; oxidation-reduction process; biological_process GO:0004743; pyruvate kinase acti…	{XM_010685619.2; PREDICTED: Beta vulgaris subsp. vulgaris pyruvate kinase 1, cytosolic (LOC104898528), transcript variant X2, mRNA}	{PF01872:RibD C-terminal domain PF00224:Pyruvate kinase, barrel domain}
transcript_HQ_BAB_transcript13714/f3p0/2068	0.52267	1.3975e-05	4.0105e-05	{XP_010683420.1; PREDICTED: 2,3-bisphosphoglycerate-independent phosphoglycerate mutase [Beta vulgaris subsp. vulgaris]}	{sp|Q42908|PMGI_MESCR; 2,3-bisphosphoglycerate-independent phosphoglycerate mutase OS=Mesembryanthemum crystallinum GN=PGM1 PE=2 SV=1}	{bvg:104882799; K15633 gpmI 2,3-bisphosphoglycerate-independent phosphoglycerate mutase 5.4.2.12 ko01200; Metabolism; Global and overview maps; Carbon metabolism | ko01230; Metabolism; Global and overview maps; Biosynthesis of amino acids | ko00010; Metabolism; Carbohydrate metabolism; Glycolysis / gluconeogenesis | ko00680; Metabolism; Energy metabolism; Methane metabolism | ko00260; Metabolism;…	{At3g08590; KOG4513 Phosphoglycerate mutase G Carbohydrate transport and metabolism ;}	{GO:0030145; manganese ion binding; molecular_function GO:0005737; cytoplasm; cellular_component GO:0006007; glucose catabolic process; biological_process GO:0004619; phosphoglycerate mutase activity; molecular_function GO:0008152; NA GO:0016791; phosphatase activity; molecular_function GO:0003824; NA GO:0046872; metal ion binding; molecular_function}	{XM_010685118.2; PREDICTED: Beta vulgaris subsp. vulgaris 2,3-bisphosphoglycerate-independent phosphoglycerate mutase (LOC104898105), mRNA}	{PF06415:BPG-independent PGAM N-terminus (iPGM_N) PF00245:Alkaline phosphatase PF01676:Metalloenzyme superfamily}
transcript_HQ_BAB_transcript13682/f2p0/2163	0.65041	4.9314e-42	5.9572e-41	{XP_010683921.1; PREDICTED: pyruvate kinase 1, cytosolic isoform X2 [Beta vulgaris subsp. vulgaris]}	{sp|B8BJ39|KPYC1_ORYSI; Pyruvate kinase 1, cytosolic OS=Oryza sativa subsp. indica GN=OsI_35105 PE=3 SV=1}	{pper:PRUPE_ppa004145mg; K00873 PK, pyk pyruvate kinase 2.7.1.40 ko01200; Metabolism; Global and overview maps; Carbon metabolism | ko01230; Metabolism; Global and overview maps; Biosynthesis of amino acids | ko00010; Metabolism; Carbohydrate metabolism; Glycolysis / gluconeogenesis | ko00620; Metabolism; Carbohydrate metabolism; Pyruvate metabolism | ko00230; Metabolism; Nucleotide metabolism; P…	{At3g52990; KOG2323 Pyruvate kinase G Carbohydrate transport and metabolism ;}	{GO:0030955; potassium ion binding; molecular_function GO:0000287; magnesium ion binding; molecular_function GO:0009231; riboflavin biosynthetic process; biological_process GO:0055114; oxidation-reduction process; biological_process GO:0006096; glycolysis; biological_process GO:0008703; 5-amino-6-(5-phosphoribosylamino)uracil reductase activity; molecular_function GO:0004743; pyruvate kinase acti…	{XM_010685619.2; PREDICTED: Beta vulgaris subsp. vulgaris pyruvate kinase 1, cytosolic (LOC104898528), transcript variant X2, mRNA}	{PF01872:RibD C-terminal domain PF00224:Pyruvate kinase, barrel domain}
transcript_HQ_BAB_transcript13622/f3p0/2166	-0.86093	0.001627	0.0036162	{KNA21349.1; hypothetical protein SOVF_044070 [Spinacia oleracea]}	{sp|Q9SQI8|ODP24_ARATH; Dihydrolipoyllysine-residue acetyltransferase component 4 of pyruvate dehydrogenase complex, chloroplastic OS=Arabidopsis thaliana GN=LTA2 PE=2 SV=1}	{sind:105161131; K00627 DLAT, aceF, pdhC pyruvate dehydrogenase E2 component (dihydrolipoamide acetyltransferase) 2.3.1.12 ko01200; Metabolism; Global and overview maps; Carbon metabolism | ko00010; Metabolism; Carbohydrate metabolism; Glycolysis / gluconeogenesis | ko00020; Metabolism; Carbohydrate metabolism; Citrate cycle (TCA cycle) | ko00620; Metabolism; Carbohydrate metabolism; Pyruvate met…	{At3g25860; KOG0557 Dihydrolipoamide acetyltransferase C Energy production and conversion ;}	{GO:0008152; NA GO:0016746; transferase activity, transferring acyl groups; molecular_function}	{XM_010683270.2; PREDICTED: Beta vulgaris subsp. vulgaris dihydrolipoyllysine-residue acetyltransferase component 4 of pyruvate dehydrogenase complex, chloroplastic (LOC104896518), mRNA}	{PF00198:2-oxoacid dehydrogenases acyltransferase (catalytic domain) PF02817:e3 binding domain}
transcript_HQ_BAB_transcript13570/f2p0/2150	0.79162	5.6346e-63	9.8063e-62	{XP_010681915.1; PREDICTED: phosphoglucomutase, cytoplasmic [Beta vulgaris subsp. vulgaris]}	{sp|P93262|PGMC_MESCR; Phosphoglucomutase, cytoplasmic OS=Mesembryanthemum crystallinum GN=PGM1 PE=2 SV=1}	{sind:105156218; K01835 pgm phosphoglucomutase 5.4.2.2 ko00010; Metabolism; Carbohydrate metabolism; Glycolysis / Gluconeogenesis | ko00030; Metabolism; Carbohydrate metabolism; Pentose phosphate pathway | ko00052; Metabolism; Carbohydrate metabolism; galactose metabolism | ko00500; Metabolism; Carbohydrate metabolism; Starch and sucrose metabolism | ko00520; Metabolism; Carbohydrate metabolism; …	{At1g23190; KOG0625 Phosphoglucomutase G Carbohydrate transport and metabolism ;}	{GO:0071704; organic substance metabolic process; biological_process GO:0005975; carbohydrate metabolic process; biological_process GO:0016868; intramolecular transferase activity, phosphotransferases; molecular_function}	{XM_010683613.2; PREDICTED: Beta vulgaris subsp. vulgaris phosphoglucomutase, cytoplasmic (LOC104896820), mRNA}	{PF00408:Phosphoglucomutase/phosphomannomutase, C-terminal domain PF02878:Phosphoglucomutase/phosphomannomutase, alpha/beta/alpha domain I PF02880:Phosphoglucomutase/phosphomannomutase, alpha/beta/alpha domain III PF02879:Phosphoglucomutase/phosphomannomutase, alpha/beta/alpha domain II}
transcript_HQ_BAB_transcript13555/f4p0/2177	-4.9604	1.6373e-43	2.0277e-42	{XP_010683921.1; PREDICTED: pyruvate kinase 1, cytosolic isoform X2 [Beta vulgaris subsp. vulgaris]}	{sp|Q2RAK2|KPYC1_ORYSJ; Pyruvate kinase 1, cytosolic OS=Oryza sativa subsp. japonica GN=Os11g0148500 PE=1 SV=1}	{pper:PRUPE_ppa004145mg; K00873 PK, pyk pyruvate kinase 2.7.1.40 ko01200; Metabolism; Global and overview maps; Carbon metabolism | ko01230; Metabolism; Global and overview maps; Biosynthesis of amino acids | ko00010; Metabolism; Carbohydrate metabolism; Glycolysis / gluconeogenesis | ko00620; Metabolism; Carbohydrate metabolism; Pyruvate metabolism | ko00230; Metabolism; Nucleotide metabolism; P…	{At3g52990; KOG2323 Pyruvate kinase G Carbohydrate transport and metabolism ;}	{GO:0009231; riboflavin biosynthetic process; biological_process GO:0030955; potassium ion binding; molecular_function GO:0000287; magnesium ion binding; molecular_function GO:0004743; pyruvate kinase activity; molecular_function GO:0055114; oxidation-reduction process; biological_process GO:0008703; 5-amino-6-(5-phosphoribosylamino)uracil reductase activity; molecular_function GO:0006096; glycol…	{XM_010685619.2; PREDICTED: Beta vulgaris subsp. vulgaris pyruvate kinase 1, cytosolic (LOC104898528), transcript variant X2, mRNA}	{PF00224:Pyruvate kinase, barrel domain PF01872:RibD C-terminal domain}
transcript_HQ_BAB_transcript13409/f9p0/2140	-0.54495	7.6966e-20	5.0345e-19	{O82059.2; RecName: Full=Glucose-6-phosphate isomerase, cytosolic; Short=GPI; AltName: Full=Phosphoglucose isomerase; Short=PGI; AltName: Full=Phosphohexose isomerase; Short=PHI}	{sp|O82059|G6PI_SPIOL; Glucose-6-phosphate isomerase, cytosolic OS=Spinacia oleracea GN=PGIC PE=2 SV=2}	{bvg:104893126; K01810 GPI, pgi glucose-6-phosphate isomerase 5.3.1.9 ko01200; Metabolism; Global and overview maps; Carbon metabolism | ko00010; Metabolism; Carbohydrate metabolism; Glycolysis / gluconeogenesis | ko00030; Metabolism; Carbohydrate metabolism; pentose phosphate pathway | ko00500; Metabolism; Carbohydrate metabolism; Starch and sucrose metabolism | ko00520; Metabolism; Carbohydrate…	{At5g42740; KOG2446 Glucose-6-phosphate isomerase G Carbohydrate transport and metabolism ;}	{GO:0004347; glucose-6-phosphate isomerase activity; molecular_function GO:0006094; gluconeogenesis; biological_process GO:0006096; glycolysis; biological_process}	{AJ000266.1; Spinacia oleracea mRNA for cytosolic glucose-6-phosphate isomerase}	{PF00342:Phosphoglucose isomerase}
transcript_HQ_BAB_transcript13381/f7p0/2157	-2.5546	0	0	{XP_019106732.1; PREDICTED: glucose-1-phosphate adenylyltransferase large subunit, chloroplastic/amyloplastic isoform X1 [Beta vulgaris subsp. vulgaris]}	{sp|P55233|GLGL1_BETVU; Glucose-1-phosphate adenylyltransferase large subunit, chloroplastic/amyloplastic OS=Beta vulgaris GN=AGPS1 PE=2 SV=1}	{pop:POPTR_0002s03480g; K00975 glgC glucose-1-phosphate adenylyltransferase 2.7.7.27 ko00500; Metabolism; Carbohydrate metabolism; Starch and sucrose metabolism | ko00520; Metabolism; Carbohydrate metabolism; Amino sugar and nucleotide sugar metabolism | ko02026; Cellular Processes; Cellular community - prokaryotes; Biofilm formation - Escherichia coli}	{At1g27680; KOG1322 GDP-mannose pyrophosphorylase/mannose-1-phosphate guanylyltransferase M Cell wall/membrane/envelope biogenesis ;}	{GO:0016779; nucleotidyltransferase activity; molecular_function GO:0009058; biosynthetic process; biological_process}	{XM_019251187.1; PREDICTED: Beta vulgaris subsp. vulgaris glucose-1-phosphate adenylyltransferase large subunit, chloroplastic/amyloplastic (LOC104889614), transcript variant X1, mRNA}	{PF00483:Nucleotidyl transferase}
transcript_HQ_BAB_transcript13310/f3p0/2204	0.39325	0.00055648	0.0013196	{XP_010681044.1; PREDICTED: ATP-dependent 6-phosphofructokinase 5, chloroplastic [Beta vulgaris subsp. vulgaris]}	{sp|Q8VYN6|PFKA5_ARATH; ATP-dependent 6-phosphofructokinase 5, chloroplastic OS=Arabidopsis thaliana GN=PFK5 PE=1 SV=1}	{rcu:8267060; K00850 pfkA, PFK 6-phosphofructokinase 1 2.7.1.11 ko01200; Metabolism; Global and overview maps; Carbon metabolism | ko01230; Metabolism; Global and overview maps; Biosynthesis of amino acids | ko00010; Metabolism; Carbohydrate metabolism; Glycolysis / Gluconeogenesis | ko00030; Metabolism; Carbohydrate metabolism; Pentose phosphate pathway | ko00051; Metabolism; Carbohydrate metabo…	{At2g22480; KOG2440 Pyrophosphate-dependent phosphofructo-1-kinase G Carbohydrate transport and metabolism ;}	{GO:0016301; kinase activity; molecular_function GO:0003872; 6-phosphofructokinase activity; molecular_function GO:0006096; glycolysis; biological_process}	{XM_010682742.2; PREDICTED: Beta vulgaris subsp. vulgaris ATP-dependent 6-phosphofructokinase 5, chloroplastic (LOC104896058), mRNA}	{PF00365:Phosphofructokinase PF00781:Diacylglycerol kinase catalytic domain}
transcript_HQ_BAB_transcript13309/f2p0/2177	-0.42642	1.3401e-06	4.2506e-06	{XP_010693684.1; PREDICTED: trehalose-phosphate phosphatase A [Beta vulgaris subsp. vulgaris]}	{sp|O64896|TPPA_ARATH; Trehalose-phosphate phosphatase A OS=Arabidopsis thaliana GN=TPPA PE=1 SV=1}	{vra:106756237; K01087 otsB trehalose 6-phosphate phosphatase 3.1.3.12 ko00500; Metabolism; Carbohydrate metabolism; Starch and sucrose metabolism}	{At5g51460; KOG1050 Trehalose-6-phosphate synthase component TPS1 and related subunits G Carbohydrate transport and metabolism ;}	{GO:0003824; NA GO:0005992; trehalose biosynthetic process; biological_process GO:0016740; transferase activity; molecular_function}	{XM_010695382.2; PREDICTED: Beta vulgaris subsp. vulgaris trehalose-phosphate phosphatase A (LOC104906608), transcript variant X1, mRNA}	{PF02358:Trehalose-phosphatase PF00765:Autoinducer synthase}
transcript_HQ_BAB_transcript13297/f2p0/2213	0.8442	1.2652e-12	6.033e-12	{XP_010689012.1; PREDICTED: mannan endo-1,4-beta-mannosidase 2-like [Beta vulgaris subsp. vulgaris]}	{sp|Q7Y223|MAN2_ARATH; Mannan endo-1,4-beta-mannosidase 2 OS=Arabidopsis thaliana GN=MAN2 PE=2 SV=1}	{ini:109167684; K19355 MAN mannan endo-1,4-beta-mannosidase 3.2.1.78 ko00051; Metabolism; Carbohydrate metabolism; Fructose and mannose metabolism}	{NA}	{GO:0004553; hydrolase activity, hydrolyzing O-glycosyl compounds; molecular_function GO:0005975; carbohydrate metabolic process; biological_process}	{XM_010690710.2; PREDICTED: Beta vulgaris subsp. vulgaris mannan endo-1,4-beta-mannosidase 2-like (LOC104902808), mRNA}	{PF02836:Glycosyl hydrolases family 2, TIM barrel domain PF00150:Cellulase (glycosyl hydrolase family 5)}
transcript_HQ_BAB_transcript13125/f2p0/2216	-0.96423	7.0932e-10	2.8611e-09	{XP_010693230.1; PREDICTED: ATP-dependent 6-phosphofructokinase 5, chloroplastic [Beta vulgaris subsp. vulgaris]}	{sp|Q8VYN6|PFKA5_ARATH; ATP-dependent 6-phosphofructokinase 5, chloroplastic OS=Arabidopsis thaliana GN=PFK5 PE=1 SV=1}	{nnu:104598147; K00850 pfkA, PFK 6-phosphofructokinase 1 2.7.1.11 ko01200; Metabolism; Global and overview maps; Carbon metabolism | ko01230; Metabolism; Global and overview maps; Biosynthesis of amino acids | ko00010; Metabolism; Carbohydrate metabolism; Glycolysis / Gluconeogenesis | ko00030; Metabolism; Carbohydrate metabolism; Pentose phosphate pathway | ko00051; Metabolism; Carbohydrate meta…	{At2g22480; KOG2440 Pyrophosphate-dependent phosphofructo-1-kinase G Carbohydrate transport and metabolism ;}	{GO:0006096; glycolysis; biological_process GO:0016301; kinase activity; molecular_function GO:0003872; 6-phosphofructokinase activity; molecular_function}	{XM_010694928.2; PREDICTED: Beta vulgaris subsp. vulgaris ATP-dependent 6-phosphofructokinase 5, chloroplastic (LOC104906202), mRNA}	{PF00781:Diacylglycerol kinase catalytic domain PF00365:Phosphofructokinase}
transcript_HQ_BAB_transcript13030/f5p0/2221	-0.52895	5.1728e-20	3.4037e-19	{XP_010686769.1; PREDICTED: pyrophosphate--fructose 6-phosphate 1-phosphotransferase subunit beta [Beta vulgaris subsp. vulgaris]}	{sp|P21343|PFPB_SOLTU; Pyrophosphate--fructose 6-phosphate 1-phosphotransferase subunit beta OS=Solanum tuberosum GN=PFP-BETA PE=1 SV=3}	{cmo:103484643; K00895 pfp, PFP diphosphate-dependent phosphofructokinase 2.7.1.90 ko00010; Metabolism; Carbohydrate metabolism; Glycolysis / Gluconeogenesis | ko00030; Metabolism; Carbohydrate metabolism; Pentose phosphate pathway | ko00051; Metabolism; Carbohydrate metabolism; Fructose and mannose metabolism}	{At1g12000; KOG2440 Pyrophosphate-dependent phosphofructo-1-kinase G Carbohydrate transport and metabolism ;}	{GO:0003872; 6-phosphofructokinase activity; molecular_function GO:0006096; glycolysis; biological_process}	{XM_010688467.2; PREDICTED: Beta vulgaris subsp. vulgaris pyrophosphate--fructose 6-phosphate 1-phosphotransferase subunit beta (LOC104900934), mRNA}	{PF00365:Phosphofructokinase}
transcript_HQ_BAB_transcript13002/f3p0/2243	0.71233	0.0034763	0.0073573	{KNA08556.1; hypothetical protein SOVF_161540 [Spinacia oleracea]}	{sp|Q0WQF7|ODP21_ARATH; Dihydrolipoyllysine-residue acetyltransferase component 1 of pyruvate dehydrogenase complex, mitochondrial OS=Arabidopsis thaliana GN=LTA3 PE=1 SV=2}	{bvg:104887207; K00627 DLAT, aceF, pdhC pyruvate dehydrogenase E2 component (dihydrolipoamide acetyltransferase) 2.3.1.12 ko01200; Metabolism; Global and overview maps; Carbon metabolism | ko00010; Metabolism; Carbohydrate metabolism; Glycolysis / gluconeogenesis | ko00020; Metabolism; Carbohydrate metabolism; Citrate cycle (TCA cycle) | ko00620; Metabolism; Carbohydrate metabolism; Pyruvate meta…	{At3g52200; KOG0557 Dihydrolipoamide acetyltransferase C Energy production and conversion ;}	{GO:0008152; NA GO:0016763; transferase activity, transferring pentosyl groups; molecular_function GO:0016746; transferase activity, transferring acyl groups; molecular_function}	{XM_010671804.2; PREDICTED: Beta vulgaris subsp. vulgaris dihydrolipoyllysine-residue acetyltransferase component 1 of pyruvate dehydrogenase complex, mitochondrial (LOC104887207), mRNA}	{PF02817:e3 binding domain PF00198:2-oxoacid dehydrogenases acyltransferase (catalytic domain) PF02749:Quinolinate phosphoribosyl transferase, N-terminal domain}
transcript_HQ_BAB_transcript12924/f2p0/2215	0.46581	3.9505e-09	1.5175e-08	{KNA25875.1; hypothetical protein SOVF_002480 [Spinacia oleracea]}	{sp|Q40546|KPYG_TOBAC; Pyruvate kinase isozyme G, chloroplastic OS=Nicotiana tabacum PE=2 SV=1}	{bvg:104892942; K00873 PK, pyk pyruvate kinase 2.7.1.40 ko01200; Metabolism; Global and overview maps; Carbon metabolism | ko01230; Metabolism; Global and overview maps; Biosynthesis of amino acids | ko00010; Metabolism; Carbohydrate metabolism; Glycolysis / gluconeogenesis | ko00620; Metabolism; Carbohydrate metabolism; Pyruvate metabolism | ko00230; Metabolism; Nucleotide metabolism; Purine met…	{At1g32440; KOG2323 Pyruvate kinase G Carbohydrate transport and metabolism ;}	{GO:0004743; pyruvate kinase activity; molecular_function GO:0005975; carbohydrate metabolic process; biological_process GO:0006096; glycolysis; biological_process GO:0003824; NA GO:0004553; hydrolase activity, hydrolyzing O-glycosyl compounds; molecular_function GO:0000287; magnesium ion binding; molecular_function GO:0030955; potassium ion binding; molecular_function}	{XM_010678970.2; PREDICTED: Beta vulgaris subsp. vulgaris pyruvate kinase isozyme G, chloroplastic (LOC104892942), mRNA}	{PF00150:Cellulase (glycosyl hydrolase family 5) PF03328:HpcH/HpaI aldolase/citrate lyase family PF00224:Pyruvate kinase, barrel domain}
transcript_HQ_BAB_transcript12727/f6p0/2265	0.73827	1.2555e-11	5.6353e-11	{XP_010696262.1; PREDICTED: galacturonosyltransferase 8 [Beta vulgaris subsp. vulgaris]}	{sp|Q9LSG3|GAUT8_ARATH; Galacturonosyltransferase 8 OS=Arabidopsis thaliana GN=GAUT8 PE=1 SV=1}	{rcu:8279036; K13648 GAUT alpha-1,4-galacturonosyltransferase 2.4.1.43 ko00520; Metabolism; Carbohydrate metabolism; Amino sugar and nucleotide sugar metabolism}	{NA}	{GO:0016757; transferase activity, transferring glycosyl groups; molecular_function}	{XM_010697960.2; PREDICTED: Beta vulgaris subsp. vulgaris galacturonosyltransferase 8 (LOC104908805), mRNA}	{PF01501:Glycosyl transferase family 8}
transcript_HQ_BAB_transcript12634/f4p0/2242	0.73493	4.2574e-05	0.00011583	{KNA16254.1; hypothetical protein SOVF_090820 [Spinacia oleracea]}	{sp|Q8L7S6|HEXO3_ARATH; Beta-hexosaminidase 3 OS=Arabidopsis thaliana GN=HEXO3 PE=1 SV=1}	{bvg:104890160; K12373 HEXA_B hexosaminidase 3.2.1.52 ko00520; Metabolism; Carbohydrate metabolism; Amino sugar and nucleotide sugar metabolism | ko00513; Metabolism; Glycan biosynthesis and metabolism; Various types of N-glycan biosynthesis | ko00531; Metabolism; Glycan biosynthesis and metabolism; Glycosaminoglycan degradation | ko00603; Metabolism; Glycan biosynthesis and metabolism; Glycosphi…	{At3g55260; KOG2499 Beta-N-acetylhexosaminidase G Carbohydrate transport and metabolism ;}	{GO:0004553; hydrolase activity, hydrolyzing O-glycosyl compounds; molecular_function GO:0005975; carbohydrate metabolic process; biological_process}	{XM_010675545.2; PREDICTED: Beta vulgaris subsp. vulgaris beta-hexosaminidase 3 (LOC104890160), mRNA}	{PF00728:Glycosyl hydrolase family 20, catalytic domain}
transcript_HQ_BAB_transcript12551/f3p0/2281	-0.92237	3.8606e-38	4.2394e-37	{XP_010673708.1; PREDICTED: hexokinase-3 [Beta vulgaris subsp. vulgaris]}	{sp|Q9LPS1|HXK3_ARATH; Hexokinase-3 OS=Arabidopsis thaliana GN=At1g50460 PE=1 SV=1}	{bvg:104890049; K00844 HK hexokinase 2.7.1.1 ko01200; Metabolism; Global and overview maps; Carbon metabolism | ko00010; Metabolism; Carbohydrate metabolism; Glycolysis / Gluconeogenesis | ko00051; Metabolism; Carbohydrate metabolism; Fructose and mannose metabolism | ko00052; Metabolism; Carbohydrate metabolism; galactose metabolism | ko00500; Metabolism; Carbohydrate metabolism; Starch and sucr…	{At1g50460; KOG1369 Hexokinase G Carbohydrate transport and metabolism ;}	{GO:0016773; phosphotransferase activity, alcohol group as acceptor; molecular_function GO:0005524; ATP binding; molecular_function GO:0005975; carbohydrate metabolic process; biological_process}	{XM_010675406.1; PREDICTED: Beta vulgaris subsp. vulgaris hexokinase-3 (LOC104890049), mRNA}	{PF03727:Hexokinase PF00349:Hexokinase}
transcript_HQ_BAB_transcript12431/f2p0/2312	-1.3811	1.4351e-07	4.9344e-07	{KNA18336.1; hypothetical protein SOVF_071830 [Spinacia oleracea]}	{sp|P22200|KPYC_SOLTU; Pyruvate kinase, cytosolic isozyme OS=Solanum tuberosum PE=2 SV=1}	{bvg:104886630; K00873 PK, pyk pyruvate kinase 2.7.1.40 ko01200; Metabolism; Global and overview maps; Carbon metabolism | ko01230; Metabolism; Global and overview maps; Biosynthesis of amino acids | ko00010; Metabolism; Carbohydrate metabolism; Glycolysis / gluconeogenesis | ko00620; Metabolism; Carbohydrate metabolism; Pyruvate metabolism | ko00230; Metabolism; Nucleotide metabolism; Purine met…	{At5g08570; KOG2323 Pyruvate kinase G Carbohydrate transport and metabolism ;}	{GO:0000287; magnesium ion binding; molecular_function GO:0030955; potassium ion binding; molecular_function GO:0004743; pyruvate kinase activity; molecular_function GO:0003824; NA GO:0006096; glycolysis; biological_process}	{XM_010671099.2; PREDICTED: Beta vulgaris subsp. vulgaris pyruvate kinase, cytosolic isozyme (LOC104886630), transcript variant X2, mRNA}	{PF00224:Pyruvate kinase, barrel domain PF03328:HpcH/HpaI aldolase/citrate lyase family}
transcript_HQ_BAB_transcript12220/f5p0/2300	0.40951	0.0064684	0.013114	{KNA26067.1; hypothetical protein SOVF_000810 [Spinacia oleracea]}	{sp|Q43117|KPYA_RICCO; Pyruvate kinase isozyme A, chloroplastic OS=Ricinus communis PE=1 SV=1}	{cic:CICLE_v10004616mg; K00873 PK, pyk pyruvate kinase 2.7.1.40 ko01200; Metabolism; Global and overview maps; Carbon metabolism | ko01230; Metabolism; Global and overview maps; Biosynthesis of amino acids | ko00010; Metabolism; Carbohydrate metabolism; Glycolysis / gluconeogenesis | ko00620; Metabolism; Carbohydrate metabolism; Pyruvate metabolism | ko00230; Metabolism; Nucleotide metabolism; Pu…	{At3g22960; KOG2323 Pyruvate kinase G Carbohydrate transport and metabolism ;}	{GO:0005524; ATP binding; molecular_function GO:0006260; DNA replication; biological_process GO:0006096; glycolysis; biological_process GO:0003678; DNA helicase activity; molecular_function GO:0003824; NA GO:0004743; pyruvate kinase activity; molecular_function GO:0030955; potassium ion binding; molecular_function GO:0000287; magnesium ion binding; molecular_function}	{XM_002311613.2; Populus trichocarpa pyruvate phosphotransferase family protein (POPTR_0008s15950g) mRNA, complete cds}	{PF00224:Pyruvate kinase, barrel domain PF03328:HpcH/HpaI aldolase/citrate lyase family PF03796:DnaB-like helicase C terminal domain}
transcript_HQ_BAB_transcript12207/f3p0/2308	1.0395	1.5342e-14	8.0392e-14	{XP_010676931.1; PREDICTED: granule-bound starch synthase 1, chloroplastic/amyloplastic [Beta vulgaris subsp. vulgaris]}	{sp|O82627|SSG1_ANTMA; Granule-bound starch synthase 1, chloroplastic/amyloplastic OS=Antirrhinum majus GN=WAXY PE=2 SV=1}	{bvg:104892645; K13679 WAXY granule-bound starch synthase 2.4.1.242 ko00500; Metabolism; Carbohydrate metabolism; Starch and sucrose metabolism}	{NA}	{NA}	{XM_010678629.2; PREDICTED: Beta vulgaris subsp. vulgaris granule-bound starch synthase 1, chloroplastic/amyloplastic (LOC104892645), mRNA}	{NA}
transcript_HQ_BAB_transcript12164/f4p0/2296	0.55324	1.108e-10	4.7195e-10	{KMT02239.1; hypothetical protein BVRB_9g206300 [Beta vulgaris subsp. vulgaris]}	{sp|O24357|G6PDC_SPIOL; Glucose-6-phosphate 1-dehydrogenase, chloroplastic OS=Spinacia oleracea GN=G6PD PE=2 SV=1}	{rcu:8264009; K00036 G6PD, zwf glucose-6-phosphate 1-dehydrogenase [EC:1.1.1.49 1.1.1.363] 1.1.1.49,1.1.1.363 ko01200; Metabolism; Global and overview maps; Carbon metabolism | ko00030; Metabolism; Carbohydrate metabolism; pentose phosphate pathway | ko00480; Metabolism; Metabolism of other amino acids; Glutathione metabolism | ko05230; Human Diseases; Cancers: Overview; Central carbon metabolism…	{At5g35790; KOG0563 Glucose-6-phosphate 1-dehydrogenase G Carbohydrate transport and metabolism ;}	{GO:0006006; glucose metabolic process; biological_process GO:0055114; oxidation-reduction process; biological_process GO:0050661; NADP binding; molecular_function GO:0004345; glucose-6-phosphate dehydrogenase activity; molecular_function}	{XM_010690958.2; PREDICTED: Beta vulgaris subsp. vulgaris glucose-6-phosphate 1-dehydrogenase, chloroplastic (LOC104902995), mRNA}	{PF00479:Glucose-6-phosphate dehydrogenase, NAD binding domain PF02781:Glucose-6-phosphate dehydrogenase, C-terminal domain}
transcript_HQ_BAB_transcript12038/f2p0/2339	-0.36628	6.4319e-08	2.274e-07	{KNA06069.1; hypothetical protein SOVF_184560 [Spinacia oleracea]}	{sp|P21342|PFPA_SOLTU; Pyrophosphate--fructose 6-phosphate 1-phosphotransferase subunit alpha OS=Solanum tuberosum GN=PFP-ALPHA PE=1 SV=2}	{bvg:104899125; K00895 pfp, PFP diphosphate-dependent phosphofructokinase 2.7.1.90 ko00010; Metabolism; Carbohydrate metabolism; Glycolysis / Gluconeogenesis | ko00030; Metabolism; Carbohydrate metabolism; Pentose phosphate pathway | ko00051; Metabolism; Carbohydrate metabolism; Fructose and mannose metabolism}	{At1g76550; KOG2440 Pyrophosphate-dependent phosphofructo-1-kinase G Carbohydrate transport and metabolism ;}	{GO:0006364; rRNA processing; biological_process GO:0006096; glycolysis; biological_process GO:0003872; 6-phosphofructokinase activity; molecular_function}	{XM_010686262.2; PREDICTED: Beta vulgaris subsp. vulgaris pyrophosphate--fructose 6-phosphate 1-phosphotransferase subunit alpha (LOC104899125), mRNA}	{PF00365:Phosphofructokinase PF03652:Holliday junction resolvase}
transcript_HQ_BAB_transcript12003/f6p0/2322	-0.56888	4.983e-13	2.4303e-12	{XP_010676931.1; PREDICTED: granule-bound starch synthase 1, chloroplastic/amyloplastic [Beta vulgaris subsp. vulgaris]}	{sp|O82627|SSG1_ANTMA; Granule-bound starch synthase 1, chloroplastic/amyloplastic OS=Antirrhinum majus GN=WAXY PE=2 SV=1}	{bvg:104892645; K13679 WAXY granule-bound starch synthase 2.4.1.242 ko00500; Metabolism; Carbohydrate metabolism; Starch and sucrose metabolism}	{NA}	{NA}	{XM_010678629.2; PREDICTED: Beta vulgaris subsp. vulgaris granule-bound starch synthase 1, chloroplastic/amyloplastic (LOC104892645), mRNA}	{NA}
transcript_HQ_BAB_transcript11946/f6p0/2302	0.72646	8.22e-10	3.2999e-09	{KNA06069.1; hypothetical protein SOVF_184560 [Spinacia oleracea]}	{sp|P21342|PFPA_SOLTU; Pyrophosphate--fructose 6-phosphate 1-phosphotransferase subunit alpha OS=Solanum tuberosum GN=PFP-ALPHA PE=1 SV=2}	{bvg:104899125; K00895 pfp, PFP diphosphate-dependent phosphofructokinase 2.7.1.90 ko00010; Metabolism; Carbohydrate metabolism; Glycolysis / Gluconeogenesis | ko00030; Metabolism; Carbohydrate metabolism; Pentose phosphate pathway | ko00051; Metabolism; Carbohydrate metabolism; Fructose and mannose metabolism}	{At1g76550; KOG2440 Pyrophosphate-dependent phosphofructo-1-kinase G Carbohydrate transport and metabolism ;}	{GO:0006096; glycolysis; biological_process GO:0006364; rRNA processing; biological_process GO:0003872; 6-phosphofructokinase activity; molecular_function}	{XM_010686262.2; PREDICTED: Beta vulgaris subsp. vulgaris pyrophosphate--fructose 6-phosphate 1-phosphotransferase subunit alpha (LOC104899125), mRNA}	{PF03652:Holliday junction resolvase PF00365:Phosphofructokinase}
transcript_HQ_BAB_transcript11938/f5p0/2334	-3.5418	3.7598e-86	9.1941e-85	{KMT02239.1; hypothetical protein BVRB_9g206300 [Beta vulgaris subsp. vulgaris]}	{sp|O24357|G6PDC_SPIOL; Glucose-6-phosphate 1-dehydrogenase, chloroplastic OS=Spinacia oleracea GN=G6PD PE=2 SV=1}	{rcu:8264009; K00036 G6PD, zwf glucose-6-phosphate 1-dehydrogenase [EC:1.1.1.49 1.1.1.363] 1.1.1.49,1.1.1.363 ko01200; Metabolism; Global and overview maps; Carbon metabolism | ko00030; Metabolism; Carbohydrate metabolism; pentose phosphate pathway | ko00480; Metabolism; Metabolism of other amino acids; Glutathione metabolism | ko05230; Human Diseases; Cancers: Overview; Central carbon metabolism…	{At5g35790; KOG0563 Glucose-6-phosphate 1-dehydrogenase G Carbohydrate transport and metabolism ;}	{GO:0004345; glucose-6-phosphate dehydrogenase activity; molecular_function GO:0050661; NADP binding; molecular_function GO:0055114; oxidation-reduction process; biological_process GO:0006006; glucose metabolic process; biological_process}	{XM_010690958.2; PREDICTED: Beta vulgaris subsp. vulgaris glucose-6-phosphate 1-dehydrogenase, chloroplastic (LOC104902995), mRNA}	{PF00479:Glucose-6-phosphate dehydrogenase, NAD binding domain PF02781:Glucose-6-phosphate dehydrogenase, C-terminal domain}
transcript_HQ_BAB_transcript11448/f3p0/2407	-5.2561	3.0381e-196	1.8236e-194	{XP_010676845.1; PREDICTED: probable trehalase [Beta vulgaris subsp. vulgaris]}	{sp|Q9SU50|TRE1_ARATH; Trehalase OS=Arabidopsis thaliana GN=TRE1 PE=2 SV=1}	{bvg:104892576; K01194 TREH, treA, treF alpha,alpha-trehalase 3.2.1.28 ko00500; Metabolism; Carbohydrate metabolism; Starch and sucrose metabolism}	{At4g24040; KOG0602 Neutral trehalase G Carbohydrate transport and metabolism ;}	{GO:0004555; alpha,alpha-trehalase activity; molecular_function GO:0005991; trehalose metabolic process; biological_process}	{XM_010678543.2; PREDICTED: Beta vulgaris subsp. vulgaris probable trehalase (LOC104892576), mRNA}	{PF01204:Trehalase}
transcript_HQ_BAB_transcript11339/f2p0/2429	0.412	3.9318e-10	1.6152e-09	{XP_010688341.1; PREDICTED: hexokinase-1 [Beta vulgaris subsp. vulgaris]}	{sp|Q9SEK3|HXK1_SPIOL; Hexokinase-1 OS=Spinacia oleracea GN=HXK1 PE=2 SV=1}	{pper:PRUPE_ppa004637mg; K00844 HK hexokinase 2.7.1.1 ko01200; Metabolism; Global and overview maps; Carbon metabolism | ko00010; Metabolism; Carbohydrate metabolism; Glycolysis / Gluconeogenesis | ko00051; Metabolism; Carbohydrate metabolism; Fructose and mannose metabolism | ko00052; Metabolism; Carbohydrate metabolism; galactose metabolism | ko00500; Metabolism; Carbohydrate metabolism; Starch…	{At4g29130; KOG1369 Hexokinase G Carbohydrate transport and metabolism ;}	{GO:0005975; carbohydrate metabolic process; biological_process GO:0055114; oxidation-reduction process; biological_process GO:0016773; phosphotransferase activity, alcohol group as acceptor; molecular_function GO:0005524; ATP binding; molecular_function GO:0015936; coenzyme A metabolic process; biological_process GO:0004420; hydroxymethylglutaryl-CoA reductase (NADPH) activity; molecular_functio…	{XM_010690039.2; PREDICTED: Beta vulgaris subsp. vulgaris hexokinase-1 (LOC104902309), mRNA}	{PF00368:Hydroxymethylglutaryl-coenzyme A reductase PF00349:Hexokinase PF03727:Hexokinase}
transcript_HQ_BAB_transcript11236/f3p0/2424	1.12	3.0772e-39	3.4786e-38	{XP_010671436.1; PREDICTED: starch synthase 1, chloroplastic/amyloplastic [Beta vulgaris subsp. vulgaris]}	{sp|Q9FNF2|SSY1_ARATH; Starch synthase 1, chloroplastic/amyloplastic OS=Arabidopsis thaliana GN=SS1 PE=2 SV=1}	{bvg:104888235; K00703 glgA starch synthase 2.4.1.21 ko00500; Metabolism; Carbohydrate metabolism; Starch and sucrose metabolism | ko02026; Cellular Processes; Cellular community - prokaryotes; Biofilm formation - Escherichia coli}	{NA}	{NA}	{XM_010673134.2; PREDICTED: Beta vulgaris subsp. vulgaris starch synthase 1, chloroplastic/amyloplastic (LOC104888235), mRNA}	{NA}
transcript_HQ_BAB_transcript10698/f2p0/2480	0.78316	7.6997e-07	2.4909e-06	{XP_010691935.1; PREDICTED: GDP-mannose 4,6 dehydratase 1 [Beta vulgaris subsp. vulgaris]}	{sp|P93031|GMD2_ARATH; GDP-mannose 4,6 dehydratase 2 OS=Arabidopsis thaliana GN=MUR1 PE=1 SV=3}	{pper:PRUPE_ppa007357mg; K01711 gmd, GMDS GDPmannose 4,6-dehydratase 4.2.1.47 ko00051; Metabolism; Carbohydrate metabolism; Fructose and mannose metabolism | ko00520; Metabolism; Carbohydrate metabolism; Amino sugar and nucleotide sugar metabolism}	{At5g66280; KOG1372 GDP-mannose 4,6 dehydratase G Carbohydrate transport and metabolism ;}	{GO:0003824; NA GO:0050662; coenzyme binding; molecular_function}	{XM_010693633.2; PREDICTED: Beta vulgaris subsp. vulgaris GDP-mannose 4,6 dehydratase 1 (LOC104905183), mRNA}	{PF01370:NAD dependent epimerase/dehydratase family}
transcript_HQ_BAB_transcript10457/f2p0/2526	0.73873	0.00029173	0.00071745	{KNA12263.1; hypothetical protein SOVF_127580 [Spinacia oleracea]}	{sp|Q0WQD2|GAUT3_ARATH; Probable galacturonosyltransferase 3 OS=Arabidopsis thaliana GN=GAUT3 PE=2 SV=2}	{jcu:105630088; K13648 GAUT alpha-1,4-galacturonosyltransferase 2.4.1.43 ko00520; Metabolism; Carbohydrate metabolism; Amino sugar and nucleotide sugar metabolism}	{NA}	{GO:0016757; transferase activity, transferring glycosyl groups; molecular_function}	{XM_010691921.2; PREDICTED: Beta vulgaris subsp. vulgaris probable galacturonosyltransferase 3 (LOC104903806), transcript variant X1, mRNA}	{PF01501:Glycosyl transferase family 8}
transcript_HQ_BAB_transcript10403/f2p0/2519	-4.0867	0	0	{XP_010688887.1; PREDICTED: UDP-glucose 6-dehydrogenase 1 [Beta vulgaris subsp. vulgaris]}	{sp|Q96558|UGDH1_SOYBN; UDP-glucose 6-dehydrogenase 1 OS=Glycine max GN=UGD1 PE=2 SV=1}	{thj:104805508; K00012 UGDH, ugd UDPglucose 6-dehydrogenase 1.1.1.22 ko00040; Metabolism; Carbohydrate metabolism; Pentose and glucuronate interconversions | ko00053; Metabolism; Carbohydrate metabolism; Ascorbate and aldarate metabolism | ko00520; Metabolism; Carbohydrate metabolism; Amino sugar and nucleotide sugar metabolism}	{At5g15490; KOG2666 UDP-glucose/GDP-mannose dehydrogenase GT Carbohydrate transport and metabolism ; Signal transduction mechanisms ;}	{GO:0016491; oxidoreductase activity; molecular_function GO:0016616; oxidoreductase activity, acting on the CH-OH group of donors, NAD or NADP as acceptor; molecular_function GO:0004616; phosphogluconate dehydrogenase (decarboxylating) activity; molecular_function GO:0051287; NAD binding; molecular_function GO:0055114; oxidation-reduction process; biological_process}	{XM_010690585.2; PREDICTED: Beta vulgaris subsp. vulgaris UDP-glucose 6-dehydrogenase 1 (LOC104902705), transcript variant X1, mRNA}	{PF03435:Saccharopine dehydrogenase NADP binding domain PF03721:UDP-glucose/GDP-mannose dehydrogenase family, NAD binding domain PF03446:NAD binding domain of 6-phosphogluconate dehydrogenase PF03720:UDP-glucose/GDP-mannose dehydrogenase family, UDP binding domain PF00984:UDP-glucose/GDP-mannose dehydrogenase family, central domain}
transcript_HQ_BAB_transcript10342/f2p0/2523	1.7381	9.9662e-18	5.999e-17	{XP_010687471.1; PREDICTED: beta-xylosidase/alpha-L-arabinofuranosidase 2 [Beta vulgaris subsp. vulgaris]}	{sp|A5JTQ2|XYL1_MEDSV; Beta-xylosidase/alpha-L-arabinofuranosidase 1 (Fragment) OS=Medicago sativa subsp. varia GN=Xyl1 PE=1 SV=1}	{pop:POPTR_0001s21430g; K15920 XYL4 beta-D-xylosidase 4 3.2.1.37 ko00520; Metabolism; Carbohydrate metabolism; Amino sugar and nucleotide sugar metabolism}	{NA}	{GO:0004553; hydrolase activity, hydrolyzing O-glycosyl compounds; molecular_function GO:0005975; carbohydrate metabolic process; biological_process}	{XM_010689169.2; PREDICTED: Beta vulgaris subsp. vulgaris beta-xylosidase/alpha-L-arabinofuranosidase 2 (LOC104901578), mRNA}	{PF01915:Glycosyl hydrolase family 3 C-terminal domain PF00933:Glycosyl hydrolase family 3 N terminal domain}
transcript_HQ_BAB_transcript10293/f3p0/2536	-5.7211	9.5149e-28	7.9901e-27	{XP_010107741.1; GDP-mannose 3,5-epimerase 1 [Morus notabilis]}	{sp|A2Z7B3|GME1_ORYSI; GDP-mannose 3,5-epimerase 1 OS=Oryza sativa subsp. indica GN=OsI_032456 PE=2 SV=1}	{csv:101222554; K10046 GME GDP-D-mannose 3', 5'-epimerase [EC:5.1.3.18 5.1.3.-] 5.1.3.18,5.1.3.- ko00053; Metabolism; Carbohydrate metabolism; Ascorbate and aldarate metabolism | ko00520; Metabolism; Carbohydrate metabolism; Amino sugar and nucleotide sugar metabolism}	{At5g28840; KOG1429 dTDP-glucose 4-6-dehydratase/UDP-glucuronic acid decarboxylase GM Carbohydrate transport and metabolism ; Cell wall/membrane/envelope biogenesis ;}	{GO:0050662; coenzyme binding; molecular_function GO:0003824; NA}	{XM_003521701.3; PREDICTED: Glycine max GDP-mannose 3,5-epimerase 2-like (LOC100794772), mRNA}	{PF01370:NAD dependent epimerase/dehydratase family}
transcript_HQ_BAB_transcript10092/f2p0/2559	0.64979	8.6405e-08	3.0255e-07	{XP_010676845.1; PREDICTED: probable trehalase [Beta vulgaris subsp. vulgaris]}	{sp|Q9FWC1|TRE_ORYSJ; Probable trehalase OS=Oryza sativa subsp. japonica GN=Os10g0521000 PE=2 SV=1}	{bvg:104892576; K01194 TREH, treA, treF alpha,alpha-trehalase 3.2.1.28 ko00500; Metabolism; Carbohydrate metabolism; Starch and sucrose metabolism}	{At4g24040; KOG0602 Neutral trehalase G Carbohydrate transport and metabolism ;}	{GO:0004555; alpha,alpha-trehalase activity; molecular_function GO:0005991; trehalose metabolic process; biological_process}	{XM_010678543.2; PREDICTED: Beta vulgaris subsp. vulgaris probable trehalase (LOC104892576), mRNA}	{PF01204:Trehalase}
transcript_HQ_BAB_transcript10057/f2p0/2592	-0.14049	0.0046632	0.0096735	{XP_010689405.1; PREDICTED: 6-phosphofructo-2-kinase/fructose-2,6-bisphosphatase [Beta vulgaris subsp. vulgaris]}	{sp|Q9MB58|F26_ARATH; 6-phosphofructo-2-kinase/fructose-2,6-bisphosphatase OS=Arabidopsis thaliana GN=FKFBP PE=1 SV=1}	{ini:109173792; K01103 PFKFB3 6-phosphofructo-2-kinase / fructose-2,6-biphosphatase 3&#160 2.7.1.105,3.1.3.46 ko00051; Metabolism; Carbohydrate metabolism; Fructose and mannose metabolism | ko04066; Environmental Information Processing; Signal transduction; HIF-1 signaling pathway | ko04152; Environmental Information Processing; Signal transduction; AMPK signaling pathway}	{At1g07110; KOG0234 Fructose-6-phosphate 2-kinase/fructose-2,6-biphosphatase G Carbohydrate transport and metabolism ;}	{GO:0006000; fructose metabolic process; biological_process GO:0003873; 6-phosphofructo-2-kinase activity; molecular_function GO:0005524; ATP binding; molecular_function}	{AF041848.1; Spinacia oleracea fructose-6-phosphate 2-kinase /fructose-2,6-bisphosphatase mRNA, complete cds}	{PF01591:6-phosphofructo-2-kinase}

## Sheet: LB vs. HB
Table S9 DEGs related to glucose metabolism in Haloxylon persicum
Gene_id	log2FoldChange	pval	padj	{nr}	{SwissProt}	{KEGG}	{KOG}	{GO}	{nt}	{pfam}
transcript_HQ_SAB_transcript4116/f3p0/3039	12.472	0	0	{XP_010671592.1; PREDICTED: alpha-glucosidase [Beta vulgaris subsp. vulgaris]}	{sp|O04893|AGLU_SPIOL; Alpha-glucosidase OS=Spinacia oleracea PE=1 SV=1}	{bvg:104888352; K01187 malZ alpha-glucosidase 3.2.1.20 ko00052; Metabolism; Carbohydrate metabolism; Galactose metabolism | ko00500; Metabolism; Carbohydrate metabolism; Starch and sucrose metabolism}	{At5g11720; KOG1065 Maltase glucoamylase and related hydrolases, glycosyl hydrolase family 31 G Carbohydrate transport and metabolism ;}	{GO:0004553; hydrolase activity, hydrolyzing O-glycosyl compounds; molecular_function GO:0005975; carbohydrate metabolic process; biological_process}	{XM_010673290.2; PREDICTED: Beta vulgaris subsp. vulgaris alpha-glucosidase (LOC104888352), mRNA}	{PF01055:Glycosyl hydrolases family 31 }
transcript_LQ_SAB_transcript21476/f2p0/1569	-1.0956	1.6455e-16	5.4309e-16	{XP_010677936.1; PREDICTED: glyceraldehyde-3-phosphate dehydrogenase [Beta vulgaris subsp. vulgaris]}	{sp|P34783|G3P_ATRNU; Glyceraldehyde-3-phosphate dehydrogenase OS=Atriplex nummularia PE=2 SV=1}	{bvg:104893518; K00134 GAPDH, gapA glyceraldehyde 3-phosphate dehydrogenase 1.2.1.12 ko01200; Metabolism; Global and overview maps; Carbon metabolism | ko01230; Metabolism; Global and overview maps; Biosynthesis of amino acids | ko00010; Metabolism; Carbohydrate metabolism; Glycolysis / gluconeogenesis | ko00710; Metabolism; Energy metabolism; Carbon fixation in photosynthetic organisms | ko04066…	{At1g13440; KOG0657 Glyceraldehyde 3-phosphate dehydrogenase G Carbohydrate transport and metabolism ;}	{GO:0051287; NAD binding; molecular_function GO:0016620; oxidoreductase activity, acting on the aldehyde or oxo group of donors, NAD or NADP as acceptor; molecular_function GO:0055114; oxidation-reduction process; biological_process GO:0009089; lysine biosynthetic process via diaminopimelate; biological_process GO:0008839; dihydrodipicolinate reductase activity; molecular_function}	{U02886.1; Atriplex nummularia glyceraldehyde-3-phosphate dehydrogenase (GAPDH) mRNA, complete cds}	{PF00044:Glyceraldehyde 3-phosphate dehydrogenase, NAD binding domain PF01113:Dihydrodipicolinate reductase, N-terminus PF02826:D-isomer specific 2-hydroxyacid dehydrogenase, NAD binding domain PF02800:Glyceraldehyde 3-phosphate dehydrogenase, C-terminal domain}
transcript_HQ_SAB_transcript9915/f5p0/2292	-2.2584	7.4111e-32	3.8337e-31	{XP_010693684.1; PREDICTED: trehalose-phosphate phosphatase A [Beta vulgaris subsp. vulgaris]}	{sp|O64896|TPPA_ARATH; Trehalose-phosphate phosphatase A OS=Arabidopsis thaliana GN=TPPA PE=1 SV=1}	{vra:106756237; K01087 otsB trehalose 6-phosphate phosphatase 3.1.3.12 ko00500; Metabolism; Carbohydrate metabolism; Starch and sucrose metabolism}	{At5g51460; KOG1050 Trehalose-6-phosphate synthase component TPS1 and related subunits G Carbohydrate transport and metabolism ;}	{GO:0003824; NA GO:0016740; transferase activity; molecular_function GO:0005992; trehalose biosynthetic process; biological_process}	{XM_010695382.2; PREDICTED: Beta vulgaris subsp. vulgaris trehalose-phosphate phosphatase A (LOC104906608), transcript variant X1, mRNA}	{PF00765:Autoinducer synthase PF02358:Trehalose-phosphatase}
transcript_HQ_SAB_transcript9884/f5p0/2301	-2.0582	0.0089035	0.013495	{KNA18803.1; hypothetical protein SOVF_067490 [Spinacia oleracea]}	{sp|Q9LIR6|BAM1_ARATH; Beta-amylase 1, chloroplastic OS=Arabidopsis thaliana GN=BAM1 PE=1 SV=1}	{csv:101221739; K01177 E3.2.1.2 Beta-amylase 3.2.1.2 ko00500; Metabolism; Carbohydrate metabolism; Starch and sucrose metabolism}	{NA}	{GO:0000272; polysaccharide catabolic process; biological_process GO:0016161; Beta-amylase activity; molecular_function}	{XM_013597360.1; Medicago truncatula Beta-amylase partial mRNA}	{PF01373:Glycosyl hydrolase family 14}
transcript_HQ_SAB_transcript9848/f2p0/2315	4.6965	2.2106e-17	7.5094e-17	{KNA18029.1; hypothetical protein SOVF_074550 [Spinacia oleracea]}	{sp|Q93Z24|BGA17_ARATH; Beta-galactosidase 17 OS=Arabidopsis thaliana GN=BGAL17 PE=2 SV=1}	{cit:102628668; K12309 GLB1, ELNR1 beta-galactosidase 3.2.1.23 ko00052; Metabolism; Carbohydrate metabolism; galactose metabolism | ko00600; Metabolism; Lipid metabolism; Sphingolipid metabolism | ko00531; Metabolism; Glycan biosynthesis and metabolism; Glycosaminoglycan degradation | ko00604; Metabolism; Glycan biosynthesis and metabolism; Glycosphingolipid biosynthesis - ganglio series | ko0051…	{At1g72990; KOG0496 Beta-galactosidase G Carbohydrate transport and metabolism ;}	{GO:0004565; beta-galactosidase activity; molecular_function GO:0005975; carbohydrate metabolic process; biological_process GO:0009341; beta-galactosidase complex; cellular_component}	{XM_010687085.2; PREDICTED: Beta vulgaris subsp. vulgaris beta-galactosidase 17 (LOC104899813), mRNA}	{PF02449:Beta-galactosidase}
transcript_HQ_SAB_transcript9717/f2p0/2363	2.4746	1.4836e-26	6.6785e-26	{KNA18336.1; hypothetical protein SOVF_071830 [Spinacia oleracea]}	{sp|P22200|KPYC_SOLTU; Pyruvate kinase, cytosolic isozyme OS=Solanum tuberosum PE=2 SV=1}	{bvg:104886630; K00873 PK, pyk pyruvate kinase 2.7.1.40 ko01200; Metabolism; Global and overview maps; Carbon metabolism | ko01230; Metabolism; Global and overview maps; Biosynthesis of amino acids | ko00010; Metabolism; Carbohydrate metabolism; Glycolysis / gluconeogenesis | ko00620; Metabolism; Carbohydrate metabolism; Pyruvate metabolism | ko00230; Metabolism; Nucleotide metabolism; Purine met…	{At5g08570; KOG2323 Pyruvate kinase G Carbohydrate transport and metabolism ;}	{GO:0006096; glycolysis; biological_process GO:0004743; pyruvate kinase activity; molecular_function GO:0003824; NA GO:0030955; potassium ion binding; molecular_function GO:0000287; magnesium ion binding; molecular_function}	{XM_010671099.2; PREDICTED: Beta vulgaris subsp. vulgaris pyruvate kinase, cytosolic isozyme (LOC104886630), transcript variant X2, mRNA}	{PF00224:Pyruvate kinase, barrel domain PF03328:HpcH/HpaI aldolase/citrate lyase family}
transcript_HQ_SAB_transcript9548/f3p0/2340	-1.1373	1.3222e-07	2.9409e-07	{KNA14594.1; hypothetical protein SOVF_105980 [Spinacia oleracea]}	{sp|Q9FLW9|PKP2_ARATH; Plastidial pyruvate kinase 2 OS=Arabidopsis thaliana GN=PKP2 PE=1 SV=1}	{bvg:104888326; K00873 PK, pyk pyruvate kinase 2.7.1.40 ko01200; Metabolism; Global and overview maps; Carbon metabolism | ko01230; Metabolism; Global and overview maps; Biosynthesis of amino acids | ko00010; Metabolism; Carbohydrate metabolism; Glycolysis / gluconeogenesis | ko00620; Metabolism; Carbohydrate metabolism; Pyruvate metabolism | ko00230; Metabolism; Nucleotide metabolism; Purine met…	{At5g52920; KOG2323 Pyruvate kinase G Carbohydrate transport and metabolism ;}	{GO:0000287; magnesium ion binding; molecular_function GO:0030955; potassium ion binding; molecular_function GO:0005975; carbohydrate metabolic process; biological_process GO:0006096; glycolysis; biological_process GO:0003824; NA GO:0004553; hydrolase activity, hydrolyzing O-glycosyl compounds; molecular_function GO:0004743; pyruvate kinase activity; molecular_function}	{XM_010673261.2; PREDICTED: Beta vulgaris subsp. vulgaris pyruvate kinase isozyme G, chloroplastic (LOC104888326), mRNA}	{PF00150:Cellulase (glycosyl hydrolase family 5) PF03328:HpcH/HpaI aldolase/citrate lyase family PF00224:Pyruvate kinase, barrel domain}
transcript_HQ_SAB_transcript9459/f3p0/2354	4.8251	8.9354e-191	3.1763e-189	{XP_010683420.1; PREDICTED: 2,3-bisphosphoglycerate-independent phosphoglycerate mutase [Beta vulgaris subsp. vulgaris]}	{sp|Q42908|PMGI_MESCR; 2,3-bisphosphoglycerate-independent phosphoglycerate mutase OS=Mesembryanthemum crystallinum GN=PGM1 PE=2 SV=1}	{bvg:104882799; K15633 gpmI 2,3-bisphosphoglycerate-independent phosphoglycerate mutase 5.4.2.12 ko01200; Metabolism; Global and overview maps; Carbon metabolism | ko01230; Metabolism; Global and overview maps; Biosynthesis of amino acids | ko00010; Metabolism; Carbohydrate metabolism; Glycolysis / gluconeogenesis | ko00680; Metabolism; Energy metabolism; Methane metabolism | ko00260; Metabolism;…	{At3g08590; KOG4513 Phosphoglycerate mutase G Carbohydrate transport and metabolism ;}	{GO:0004619; phosphoglycerate mutase activity; molecular_function GO:0006007; glucose catabolic process; biological_process GO:0046872; metal ion binding; molecular_function GO:0016791; phosphatase activity; molecular_function GO:0008152; NA GO:0003824; NA GO:0030145; manganese ion binding; molecular_function GO:0005737; cytoplasm; cellular_component}	{XM_019248139.1; PREDICTED: Beta vulgaris subsp. vulgaris 2,3-bisphosphoglycerate-independent phosphoglycerate mutase (LOC104882799), transcript variant X2, mRNA}	{PF01676:Metalloenzyme superfamily PF00245:Alkaline phosphatase PF06415:BPG-independent PGAM N-terminus (iPGM_N)}
transcript_HQ_SAB_transcript9366/f2p0/2360	-1.9897	3.1912e-23	1.3018e-22	{AQK42732.1; Glucose-6-phosphate 1-dehydrogenase [Zea mays]}	{sp|Q43727|G6PD1_ARATH; Glucose-6-phosphate 1-dehydrogenase 1, chloroplastic OS=Arabidopsis thaliana GN=APG1 PE=2 SV=2}	{nnu:104592835; K00036 G6PD, zwf glucose-6-phosphate 1-dehydrogenase [EC:1.1.1.49 1.1.1.363] 1.1.1.49,1.1.1.363 ko01200; Metabolism; Global and overview maps; Carbon metabolism | ko00030; Metabolism; Carbohydrate metabolism; pentose phosphate pathway | ko00480; Metabolism; Metabolism of other amino acids; Glutathione metabolism | ko05230; Human Diseases; Cancers: Overview; Central carbon metaboli…	{At5g35790; KOG0563 Glucose-6-phosphate 1-dehydrogenase G Carbohydrate transport and metabolism ;}	{NA}	{XM_019344286.1; PREDICTED: Ipomoea nil glucose-6-phosphate 1-dehydrogenase, chloroplastic (LOC109193422), mRNA}	{NA}
transcript_HQ_SAB_transcript9006/f2p0/2390	-1.3626	4.4731e-11	1.1874e-10	{XP_010681915.1; PREDICTED: phosphoglucomutase, cytoplasmic [Beta vulgaris subsp. vulgaris]}	{sp|P93262|PGMC_MESCR; Phosphoglucomutase, cytoplasmic OS=Mesembryanthemum crystallinum GN=PGM1 PE=2 SV=1}	{sind:105156218; K01835 pgm phosphoglucomutase 5.4.2.2 ko00010; Metabolism; Carbohydrate metabolism; Glycolysis / Gluconeogenesis | ko00030; Metabolism; Carbohydrate metabolism; Pentose phosphate pathway | ko00052; Metabolism; Carbohydrate metabolism; galactose metabolism | ko00500; Metabolism; Carbohydrate metabolism; Starch and sucrose metabolism | ko00520; Metabolism; Carbohydrate metabolism; …	{At1g23190; KOG0625 Phosphoglucomutase G Carbohydrate transport and metabolism ;}	{GO:0016868; intramolecular transferase activity, phosphotransferases; molecular_function GO:0005975; carbohydrate metabolic process; biological_process GO:0071704; organic substance metabolic process; biological_process}	{XM_010683613.2; PREDICTED: Beta vulgaris subsp. vulgaris phosphoglucomutase, cytoplasmic (LOC104896820), mRNA}	{PF02880:Phosphoglucomutase/phosphomannomutase, alpha/beta/alpha domain III PF00408:Phosphoglucomutase/phosphomannomutase, C-terminal domain}
transcript_HQ_SAB_transcript8919/f3p0/2413	-0.83322	5.6817e-05	0.00010605	{KNA18029.1; hypothetical protein SOVF_074550 [Spinacia oleracea]}	{sp|Q93Z24|BGA17_ARATH; Beta-galactosidase 17 OS=Arabidopsis thaliana GN=BGAL17 PE=2 SV=1}	{cit:102628668; K12309 GLB1, ELNR1 beta-galactosidase 3.2.1.23 ko00052; Metabolism; Carbohydrate metabolism; galactose metabolism | ko00600; Metabolism; Lipid metabolism; Sphingolipid metabolism | ko00531; Metabolism; Glycan biosynthesis and metabolism; Glycosaminoglycan degradation | ko00604; Metabolism; Glycan biosynthesis and metabolism; Glycosphingolipid biosynthesis - ganglio series | ko0051…	{At1g72990; KOG0496 Beta-galactosidase G Carbohydrate transport and metabolism ;}	{GO:0009341; beta-galactosidase complex; cellular_component GO:0005975; carbohydrate metabolic process; biological_process GO:0004565; beta-galactosidase activity; molecular_function}	{XM_010687085.2; PREDICTED: Beta vulgaris subsp. vulgaris beta-galactosidase 17 (LOC104899813), mRNA}	{PF02449:Beta-galactosidase}
transcript_HQ_SAB_transcript8813/f2p0/2410	-4.3509	9.3857e-11	2.4552e-10	{XP_010685628.1; PREDICTED: alpha-glucan phosphorylase, H isozyme [Beta vulgaris subsp. vulgaris]}	{sp|Q9SD76|PHS2_ARATH; Alpha-glucan phosphorylase 2, cytosolic OS=Arabidopsis thaliana GN=PHS2 PE=1 SV=1}	{mdm:103447449; K00688 PYG, glgP glycogen phosphorylase 2.4.1.1 ko00500; Metabolism; Carbohydrate metabolism; Starch and sucrose metabolism | ko02026; Cellular Processes; Cellular community - prokaryotes; Biofilm formation - Escherichia coli | ko04910; Organismal Systems; Endocrine system; Insulin signaling pathway | ko04922; Organismal Systems; Endocrine system; Glucagon signaling pathway | ko04…	{At3g46970; KOG2099 Glycogen phosphorylase G Carbohydrate transport and metabolism ;}	{GO:0005975; carbohydrate metabolic process; biological_process GO:0008184; glycogen phosphorylase activity; molecular_function}	{XM_010687326.2; PREDICTED: Beta vulgaris subsp. vulgaris alpha-glucan phosphorylase, H isozyme (LOC104900011), mRNA}	{PF00343:Carbohydrate phosphorylase}
transcript_HQ_SAB_transcript8812/f2p0/2418	-0.613	0.017748	0.025911	{XP_007204374.1; hypothetical protein PRUPE_ppa007357mg [Prunus persica]}	{sp|P93031|GMD2_ARATH; GDP-mannose 4,6 dehydratase 2 OS=Arabidopsis thaliana GN=MUR1 PE=1 SV=3}	{pper:PRUPE_ppa007357mg; K01711 gmd, GMDS GDPmannose 4,6-dehydratase 4.2.1.47 ko00051; Metabolism; Carbohydrate metabolism; Fructose and mannose metabolism | ko00520; Metabolism; Carbohydrate metabolism; Amino sugar and nucleotide sugar metabolism}	{At5g66280; KOG1372 GDP-mannose 4,6 dehydratase G Carbohydrate transport and metabolism ;}	{GO:0050662; coenzyme binding; molecular_function GO:0003824; NA}	{XM_010693633.2; PREDICTED: Beta vulgaris subsp. vulgaris GDP-mannose 4,6 dehydratase 1 (LOC104905183), mRNA}	{PF01370:NAD dependent epimerase/dehydratase family}
transcript_HQ_SAB_transcript8766/f2p0/2426	0.42611	0.0034947	0.0055476	{XP_010676931.1; PREDICTED: granule-bound starch synthase 1, chloroplastic/amyloplastic [Beta vulgaris subsp. vulgaris]}	{sp|O82627|SSG1_ANTMA; Granule-bound starch synthase 1, chloroplastic/amyloplastic OS=Antirrhinum majus GN=WAXY PE=2 SV=1}	{bvg:104892645; K13679 WAXY granule-bound starch synthase 2.4.1.242 ko00500; Metabolism; Carbohydrate metabolism; Starch and sucrose metabolism}	{NA}	{NA}	{XM_010678629.2; PREDICTED: Beta vulgaris subsp. vulgaris granule-bound starch synthase 1, chloroplastic/amyloplastic (LOC104892645), mRNA}	{NA}
transcript_HQ_SAB_transcript8661/f2p0/2451	-0.57329	9.6556e-05	0.00017722	{XP_010689405.1; PREDICTED: 6-phosphofructo-2-kinase/fructose-2,6-bisphosphatase [Beta vulgaris subsp. vulgaris]}	{sp|Q9MB58|F26_ARATH; 6-phosphofructo-2-kinase/fructose-2,6-bisphosphatase OS=Arabidopsis thaliana GN=FKFBP PE=1 SV=1}	{ini:109173792; K01103 PFKFB3 6-phosphofructo-2-kinase / fructose-2,6-biphosphatase 3&#160 2.7.1.105,3.1.3.46 ko00051; Metabolism; Carbohydrate metabolism; Fructose and mannose metabolism | ko04066; Environmental Information Processing; Signal transduction; HIF-1 signaling pathway | ko04152; Environmental Information Processing; Signal transduction; AMPK signaling pathway}	{At1g07110; KOG0234 Fructose-6-phosphate 2-kinase/fructose-2,6-biphosphatase G Carbohydrate transport and metabolism ;}	{GO:2001070; NA}	{XM_010691103.2; PREDICTED: Beta vulgaris subsp. vulgaris 6-phosphofructo-2-kinase/fructose-2,6-bisphosphatase (LOC104903114), mRNA}	{PF00686:Starch binding domain}
transcript_HQ_SAB_transcript8637/f3p0/2429	-1.2166	0.00029266	0.00051528	{KNA24526.1; hypothetical protein SOVF_014610 [Spinacia oleracea]}	{sp|Q8VZC0|UXS1_ARATH; UDP-glucuronic acid decarboxylase 1 OS=Arabidopsis thaliana GN=UXS1 PE=1 SV=1}	{pmum:103340066; K08678 UXS1, uxs UDP-glucuronate decarboxylase 4.1.1.35 ko00520; Metabolism; Carbohydrate metabolism; Amino sugar and nucleotide sugar metabolism}	{At3g53520; KOG1429 dTDP-glucose 4-6-dehydratase/UDP-glucuronic acid decarboxylase GM Carbohydrate transport and metabolism ; Cell wall/membrane/envelope biogenesis ;}	{NA}	{XM_010685895.2; PREDICTED: Beta vulgaris subsp. vulgaris UDP-glucuronic acid decarboxylase 1 (LOC104898788), mRNA}	{NA}
transcript_HQ_SAB_transcript8589/f4p0/2437	1.1563	1.2295e-09	3.0555e-09	{XP_010683064.1; PREDICTED: phosphoenolpyruvate carboxykinase [ATP] [Beta vulgaris subsp. vulgaris]}	{sp|Q9T074|PCKA_ARATH; Phosphoenolpyruvate carboxykinase (ATP) OS=Arabidopsis thaliana GN=PCKA PE=1 SV=1}	{pda:103708389; K01610 E4.1.1.49, pckA phosphoenolpyruvate carboxykinase (ATP) 4.1.1.49 ko01200; Metabolism; Global and overview maps; Carbon metabolism | ko00010; Metabolism; Carbohydrate metabolism; Glycolysis / gluconeogenesis | ko00020; Metabolism; Carbohydrate metabolism; Citrate cycle (TCA cycle) | ko00620; Metabolism; Carbohydrate metabolism; Pyruvate metabolism | ko00710; Metabolism; Ener…	{NA}	{GO:0006094; gluconeogenesis; biological_process GO:0004612; phosphoenolpyruvate carboxykinase (ATP) activity; molecular_function GO:0005524; ATP binding; molecular_function}	{XM_010684762.2; PREDICTED: Beta vulgaris subsp. vulgaris phosphoenolpyruvate carboxykinase [ATP] (LOC104897815), mRNA}	{PF01293:Phosphoenolpyruvate carboxykinase}
transcript_HQ_SAB_transcript8586/f2p0/2449	-1.0789	1.8827e-05	3.6417e-05	{XP_010694376.1; PREDICTED: uncharacterized protein LOC104907184 [Beta vulgaris subsp. vulgaris]}	{sp|A7LXU3|BGH3B_BACO1; Beta-glucosidase BoGH3B OS=Bacteroides ovatus (strain ATCC 8483 / DSM 1896 / JCM 5824 / NCTC 11153) GN=BACOVA_02659 PE=1 SV=1}	{lang:109338466; K05349 bglX beta-glucosidase 3.2.1.21 ko00500; Metabolism; Carbohydrate metabolism; Starch and sucrose metabolism | ko00460; Metabolism; Metabolism of other amino acids; Cyanoamino acid metabolism | ko00940; Metabolism; Biosynthesis of other secondary metabolites; Phenylpropanoid biosynthesis; lang:109338466; - - - - -}	{NA}	{GO:0005975; carbohydrate metabolic process; biological_process GO:0004553; hydrolase activity, hydrolyzing O-glycosyl compounds; molecular_function}	{XM_010696075.2; PREDICTED: Beta vulgaris subsp. vulgaris beta-glucosidase BoGH3B (LOC104907184), transcript variant X2, mRNA}	{PF01915:Glycosyl hydrolase family 3 C-terminal domain PF00933:Glycosyl hydrolase family 3 N terminal domain}
transcript_HQ_SAB_transcript8504/f3p0/2459	-2.0081	2.1049e-06	4.3579e-06	{KNA17728.1; hypothetical protein SOVF_077450 [Spinacia oleracea]}	{sp|O20250|TKTC_SPIOL; Transketolase, chloroplastic OS=Spinacia oleracea PE=1 SV=1}	{bvg:104888662; K00615 E2.2.1.1, tktA, tktB transketolase 2.2.1.1 ko01200; Metabolism; Global and overview maps; Carbon metabolism | ko01230; Metabolism; Global and overview maps; Biosynthesis of amino acids | ko00030; Metabolism; Carbohydrate metabolism; pentose phosphate pathway | ko00710; Metabolism; Energy metabolism; Carbon fixation in photosynthetic organisms | ko01051; Metabolism; Metaboli…	{At3g60750; KOG0523 Transketolase G Carbohydrate transport and metabolism ;}	{NA}	{XM_010673689.2; PREDICTED: Beta vulgaris subsp. vulgaris transketolase, chloroplastic (LOC104888662), mRNA}	{NA}
transcript_HQ_SAB_transcript8490/f2p0/2450	-1.7173	1.2211e-28	5.8164e-28	{XP_010688341.1; PREDICTED: hexokinase-1 [Beta vulgaris subsp. vulgaris]}	{sp|Q9SEK3|HXK1_SPIOL; Hexokinase-1 OS=Spinacia oleracea GN=HXK1 PE=2 SV=1}	{pper:PRUPE_ppa004637mg; K00844 HK hexokinase 2.7.1.1 ko01200; Metabolism; Global and overview maps; Carbon metabolism | ko00010; Metabolism; Carbohydrate metabolism; Glycolysis / Gluconeogenesis | ko00051; Metabolism; Carbohydrate metabolism; Fructose and mannose metabolism | ko00052; Metabolism; Carbohydrate metabolism; galactose metabolism | ko00500; Metabolism; Carbohydrate metabolism; Starch…	{At4g29130; KOG1369 Hexokinase G Carbohydrate transport and metabolism ;}	{GO:0050662; coenzyme binding; molecular_function GO:0005975; carbohydrate metabolic process; biological_process GO:0055114; oxidation-reduction process; biological_process GO:0015936; coenzyme A metabolic process; biological_process GO:0005524; ATP binding; molecular_function GO:0016773; phosphotransferase activity, alcohol group as acceptor; molecular_function GO:0004420; hydroxymethylglutaryl-…	{XM_010690039.2; PREDICTED: Beta vulgaris subsp. vulgaris hexokinase-1 (LOC104902309), mRNA}	{PF03727:Hexokinase PF00368:Hydroxymethylglutaryl-coenzyme A reductase PF00349:Hexokinase}
transcript_HQ_SAB_transcript8422/f2p0/2447	-2.6753	6.2991e-83	7.7744e-82	{XP_010676931.1; PREDICTED: granule-bound starch synthase 1, chloroplastic/amyloplastic [Beta vulgaris subsp. vulgaris]}	{sp|Q00775|SSG1_SOLTU; Granule-bound starch synthase 1, chloroplastic/amyloplastic OS=Solanum tuberosum GN=WAXY PE=1 SV=1}	{bvg:104892645; K13679 WAXY granule-bound starch synthase 2.4.1.242 ko00500; Metabolism; Carbohydrate metabolism; Starch and sucrose metabolism}	{NA}	{NA}	{XM_010678629.2; PREDICTED: Beta vulgaris subsp. vulgaris granule-bound starch synthase 1, chloroplastic/amyloplastic (LOC104892645), mRNA}	{NA}
transcript_HQ_SAB_transcript8415/f6p0/2448	-1.3718	1.76e-19	6.4164e-19	{XP_010682211.1; PREDICTED: acetyl-coenzyme A synthetase, chloroplastic/glyoxysomal [Beta vulgaris subsp. vulgaris]}	{sp|B9DGD6|ACS_ARATH; Acetyl-coenzyme A synthetase, chloroplastic/glyoxysomal OS=Arabidopsis thaliana GN=ACS PE=1 SV=1}	{nnu:104591930; K01895 ACSS, acs acetyl-CoA synthetase 6.2.1.1 ko01200; Metabolism; Global and overview maps; Carbon metabolism | ko00010; Metabolism; Carbohydrate metabolism; Glycolysis / gluconeogenesis | ko00620; Metabolism; Carbohydrate metabolism; Pyruvate metabolism | ko00640; Metabolism; Carbohydrate metabolism; Propanoate metabolism | ko00720; Metabolism; Energy metabolism; Carbon fixatio…	{At5g36880; KOG1175 Acyl-CoA synthetase I Lipid transport and metabolism ;}	{GO:0003824; NA GO:0008152; NA}	{XM_010683909.2; PREDICTED: Beta vulgaris subsp. vulgaris acetyl-coenzyme A synthetase, chloroplastic/glyoxysomal (LOC104897088), mRNA}	{PF00501:AMP-binding enzyme}
transcript_HQ_SAB_transcript7754/f2p0/2546	-1.6225	7.8001e-26	3.4465e-25	{XP_010689405.1; PREDICTED: 6-phosphofructo-2-kinase/fructose-2,6-bisphosphatase [Beta vulgaris subsp. vulgaris]}	{sp|Q9MB58|F26_ARATH; 6-phosphofructo-2-kinase/fructose-2,6-bisphosphatase OS=Arabidopsis thaliana GN=FKFBP PE=1 SV=1}	{ini:109173792; K01103 PFKFB3 6-phosphofructo-2-kinase / fructose-2,6-biphosphatase 3&#160 2.7.1.105,3.1.3.46 ko00051; Metabolism; Carbohydrate metabolism; Fructose and mannose metabolism | ko04066; Environmental Information Processing; Signal transduction; HIF-1 signaling pathway | ko04152; Environmental Information Processing; Signal transduction; AMPK signaling pathway}	{At1g07110; KOG0234 Fructose-6-phosphate 2-kinase/fructose-2,6-biphosphatase G Carbohydrate transport and metabolism ;}	{GO:2001070; NA}	{XM_010691103.2; PREDICTED: Beta vulgaris subsp. vulgaris 6-phosphofructo-2-kinase/fructose-2,6-bisphosphatase (LOC104903114), mRNA}	{PF00686:Starch binding domain}
transcript_HQ_SAB_transcript7603/f2p0/2558	#NAME?	9.0439e-07	1.9126e-06	{XP_010689639.1; PREDICTED: probable galacturonosyltransferase 10 isoform X1 [Beta vulgaris subsp. vulgaris]}	{sp|Q9SKT6|GAUTA_ARATH; Probable galacturonosyltransferase 10 OS=Arabidopsis thaliana GN=GAUT10 PE=2 SV=2}	{vvi:100244741; K13648 GAUT alpha-1,4-galacturonosyltransferase 2.4.1.43 ko00520; Metabolism; Carbohydrate metabolism; Amino sugar and nucleotide sugar metabolism}	{NA}	{GO:0016757; transferase activity, transferring glycosyl groups; molecular_function}	{XM_010691337.2; PREDICTED: Beta vulgaris subsp. vulgaris probable galacturonosyltransferase 10 (LOC104903322), transcript variant X1, mRNA}	{PF01501:Glycosyl transferase family 8}
transcript_HQ_SAB_transcript7096/f2p0/2615	-2.4366	2.0698e-05	3.9912e-05	{XP_010695181.2; PREDICTED: phosphoacetylglucosamine mutase [Beta vulgaris subsp. vulgaris]}	{sp|P57750|AGM1_ARATH; Phosphoacetylglucosamine mutase OS=Arabidopsis thaliana GN=DRT101 PE=1 SV=1}	{vvi:100244869; K01836 PGM3 phosphoacetylglucosamine mutase 5.4.2.3 ko00520; Metabolism; Carbohydrate metabolism; Amino sugar and nucleotide sugar metabolism}	{At5g18070; KOG2537 Phosphoglucomutase/phosphomannomutase G Carbohydrate transport and metabolism ;}	{GO:0016868; intramolecular transferase activity, phosphotransferases; molecular_function GO:0005975; carbohydrate metabolic process; biological_process}	{XM_009373613.2; PREDICTED: Pyrus x bretschneideri phosphoacetylglucosamine mutase-like (LOC103961102), mRNA}	{PF02880:Phosphoglucomutase/phosphomannomutase, alpha/beta/alpha domain III PF02878:Phosphoglucomutase/phosphomannomutase, alpha/beta/alpha domain I PF02879:Phosphoglucomutase/phosphomannomutase, alpha/beta/alpha domain II}
transcript_HQ_SAB_transcript6743/f2p0/2652	-1.8815	8.6737e-24	3.603e-23	{CAA03982.1; glucose-6-phosphate isomerase [Spinacia oleracea]}	{sp|Q8H103|G6PIP_ARATH; Glucose-6-phosphate isomerase 1, chloroplastic OS=Arabidopsis thaliana GN=PGI1 PE=1 SV=1}	{bvg:104891360; K01810 GPI, pgi glucose-6-phosphate isomerase 5.3.1.9 ko01200; Metabolism; Global and overview maps; Carbon metabolism | ko00010; Metabolism; Carbohydrate metabolism; Glycolysis / Gluconeogenesis | ko00030; Metabolism; Carbohydrate metabolism; Pentose phosphate pathway | ko00500; Metabolism; Carbohydrate metabolism; Starch and sucrose metabolism | ko00520; Metabolism; Carbohydrate…	{At4g24620; KOG2446 Glucose-6-phosphate isomerase G Carbohydrate transport and metabolism ;}	{GO:0004347; glucose-6-phosphate isomerase activity; molecular_function GO:0006096; glycolysis; biological_process GO:0006094; gluconeogenesis; biological_process}	{AJ000265.1; Spinacia oleracea mRNA (nuclear-encoded) for chloroplast glucose-6-phosphate isomerase}	{PF00342:Phosphoglucose isomerase}
transcript_HQ_SAB_transcript6689/f7p0/2608	-1.0541	2.156e-12	6.0869e-12	{KNA18592.1; hypothetical protein SOVF_069220 [Spinacia oleracea]}	{sp|Q9M9Y5|GAUT6_ARATH; Probable galacturonosyltransferase 6 OS=Arabidopsis thaliana GN=GAUT6 PE=2 SV=1}	{bvg:104894598; K13648 GAUT alpha-1,4-galacturonosyltransferase 2.4.1.43 ko00520; Metabolism; Carbohydrate metabolism; Amino sugar and nucleotide sugar metabolism}	{NA}	{GO:0016757; transferase activity, transferring glycosyl groups; molecular_function}	{XM_010680871.2; PREDICTED: Beta vulgaris subsp. vulgaris probable galacturonosyltransferase 6 (LOC104894598), mRNA}	{PF01501:Glycosyl transferase family 8}
transcript_HQ_SAB_transcript6546/f2p0/2673	-0.91135	4.0571e-09	9.8383e-09	{XP_010671436.1; PREDICTED: starch synthase 1, chloroplastic/amyloplastic [Beta vulgaris subsp. vulgaris]}	{sp|Q9FNF2|SSY1_ARATH; Starch synthase 1, chloroplastic/amyloplastic OS=Arabidopsis thaliana GN=SS1 PE=2 SV=1}	{bvg:104888235; K00703 glgA starch synthase 2.4.1.21 ko00500; Metabolism; Carbohydrate metabolism; Starch and sucrose metabolism | ko02026; Cellular Processes; Cellular community - prokaryotes; Biofilm formation - Escherichia coli}	{NA}	{NA}	{XM_010673134.2; PREDICTED: Beta vulgaris subsp. vulgaris starch synthase 1, chloroplastic/amyloplastic (LOC104888235), mRNA}	{NA}
transcript_HQ_SAB_transcript6491/f10p0/2674	-0.28812	0.030159	0.042736	{XP_010682211.1; PREDICTED: acetyl-coenzyme A synthetase, chloroplastic/glyoxysomal [Beta vulgaris subsp. vulgaris]}	{sp|B9DGD6|ACS_ARATH; Acetyl-coenzyme A synthetase, chloroplastic/glyoxysomal OS=Arabidopsis thaliana GN=ACS PE=1 SV=1}	{jcu:105630254; K01895 ACSS, acs acetyl-CoA synthetase 6.2.1.1 ko01200; Metabolism; Global and overview maps; Carbon metabolism | ko00010; Metabolism; Carbohydrate metabolism; Glycolysis / gluconeogenesis | ko00620; Metabolism; Carbohydrate metabolism; Pyruvate metabolism | ko00640; Metabolism; Carbohydrate metabolism; Propanoate metabolism | ko00720; Metabolism; Energy metabolism; Carbon fixatio…	{At5g36880; KOG1175 Acyl-CoA synthetase I Lipid transport and metabolism ;}	{GO:0003824; NA GO:0008152; NA}	{XM_010683909.2; PREDICTED: Beta vulgaris subsp. vulgaris acetyl-coenzyme A synthetase, chloroplastic/glyoxysomal (LOC104897088), mRNA}	{PF00501:AMP-binding enzyme}
transcript_HQ_SAB_transcript6425/f2p0/2712	4.5708	6.2694e-175	1.9134e-173	{XP_010676788.1; PREDICTED: pyruvate decarboxylase 2 [Beta vulgaris subsp. vulgaris]}	{sp|O82647|PDC1_ARATH; Pyruvate decarboxylase 1 OS=Arabidopsis thaliana GN=PDC1 PE=2 SV=1}	{bvg:104892526; K01568 PDC, pdc pyruvate decarboxylase 4.1.1.1 ko00010; Metabolism; Carbohydrate metabolism; Glycolysis / gluconeogenesis}	{At4g33070; KOG1184 Thiamine pyrophosphate-requiring enzyme EH Amino acid transport and metabolism ; Coenzyme transport and metabolism ;}	{GO:0030976; thiamine pyrophosphate binding; molecular_function GO:0000287; magnesium ion binding; molecular_function GO:0003824; NA}	{XM_010678486.1; PREDICTED: Beta vulgaris subsp. vulgaris pyruvate decarboxylase 2 (LOC104892526), mRNA}	{PF02775:Thiamine pyrophosphate enzyme, C-terminal TPP binding domain PF02776:Thiamine pyrophosphate enzyme, N-terminal TPP binding domain PF00205:Thiamine pyrophosphate enzyme, central domain}
transcript_HQ_SAB_transcript6271/f2p0/2720	-1.7875	8.2405e-24	3.4264e-23	{XP_010686598.1; PREDICTED: probable galacturonosyltransferase 4 [Beta vulgaris subsp. vulgaris]}	{sp|Q93ZX7|GAUT4_ARATH; Probable galacturonosyltransferase 4 OS=Arabidopsis thaliana GN=GAUT4 PE=2 SV=1}	{vvi:100258406; K13648 GAUT alpha-1,4-galacturonosyltransferase 2.4.1.43 ko00520; Metabolism; Carbohydrate metabolism; Amino sugar and nucleotide sugar metabolism}	{NA}	{GO:0005680; anaphase-promoting complex; cellular_component GO:0016757; transferase activity, transferring glycosyl groups; molecular_function}	{XM_010688296.2; PREDICTED: Beta vulgaris subsp. vulgaris probable galacturonosyltransferase 4 (LOC104900781), mRNA}	{PF01501:Glycosyl transferase family 8 PF12859:Anaphase-promoting complex subunit 1}
transcript_HQ_SAB_transcript6257/f5p0/2714	-0.32365	0.012264	0.018277	{XP_010675264.1; PREDICTED: trifunctional UDP-glucose 4,6-dehydratase/UDP-4-keto-6-deoxy-D-glucose 3,5-epimerase/UDP-4-keto-L-rhamnose-reductase RHM1 [Beta vulgaris subsp. vulgaris]}	{sp|Q9SYM5|RHM1_ARATH; Trifunctional UDP-glucose 4,6-dehydratase/UDP-4-keto-6-deoxy-D-glucose 3,5-epimerase/UDP-4-keto-L-rhamnose-reductase RHM1 OS=Arabidopsis thaliana GN=RHM1 PE=1 SV=1}	{bvg:104891292; K12450 RHM UDP-glucose 4,6-dehydratase 4.2.1.76 ko00520; Metabolism; Carbohydrate metabolism; Amino sugar and nucleotide sugar metabolism}	{At1g78570; KOG0747 Putative NAD+-dependent epimerases G Carbohydrate transport and metabolism ;}	{GO:0016616; oxidoreductase activity, acting on the CH-OH group of donors, NAD or NADP as acceptor; molecular_function GO:0003824; NA GO:0003854; 3-beta-hydroxy-delta5-steroid dehydrogenase activity; molecular_function GO:0055114; oxidation-reduction process; biological_process GO:0050662; coenzyme binding; molecular_function GO:0006694; steroid biosynthetic process; biological_process}	{XM_010676963.2; PREDICTED: Beta vulgaris subsp. vulgaris trifunctional UDP-glucose 4,6-dehydratase/UDP-4-keto-6-deoxy-D-glucose 3,5-epimerase/UDP-4-keto-L-rhamnose-reductase RHM1 (LOC104891293), transcript variant X1, mRNA}	{PF01073:3-beta hydroxysteroid dehydrogenase/isomerase family PF01370:NAD dependent epimerase/dehydratase family}
transcript_HQ_SAB_transcript6237/f2p0/2735	-3.0223	6.7211e-32	3.4843e-31	{XP_010686598.1; PREDICTED: probable galacturonosyltransferase 4 [Beta vulgaris subsp. vulgaris]}	{sp|Q93ZX7|GAUT4_ARATH; Probable galacturonosyltransferase 4 OS=Arabidopsis thaliana GN=GAUT4 PE=2 SV=1}	{vvi:100852446; K13648 GAUT alpha-1,4-galacturonosyltransferase 2.4.1.43 ko00520; Metabolism; Carbohydrate metabolism; Amino sugar and nucleotide sugar metabolism}	{NA}	{GO:0005680; anaphase-promoting complex; cellular_component GO:0016757; transferase activity, transferring glycosyl groups; molecular_function}	{XM_010688296.2; PREDICTED: Beta vulgaris subsp. vulgaris probable galacturonosyltransferase 4 (LOC104900781), mRNA}	{PF01501:Glycosyl transferase family 8 PF12859:Anaphase-promoting complex subunit 1}
transcript_HQ_SAB_transcript6141/f2p0/2723	-1.2724	4.4306e-09	1.0712e-08	{KNA08273.1; hypothetical protein SOVF_164070 [Spinacia oleracea]}	{sp|O22141|GAE4_ARATH; UDP-glucuronate 4-epimerase 4 OS=Arabidopsis thaliana GN=GAE4 PE=1 SV=1}	{bvg:104892440; K08679 E5.1.3.6 UDP-glucuronate 4-epimerase 5.1.3.6 ko00520; Metabolism; Carbohydrate metabolism; Amino sugar and nucleotide sugar metabolism}	{At2g45310; KOG1371 UDP-glucose 4-epimerase/UDP-sulfoquinovose synthase M Cell wall/membrane/envelope biogenesis ;}	{GO:0003854; 3-beta-hydroxy-delta5-steroid dehydrogenase activity; molecular_function GO:0003824; NA GO:0016616; oxidoreductase activity, acting on the CH-OH group of donors, NAD or NADP as acceptor; molecular_function GO:0006694; steroid biosynthetic process; biological_process GO:0050662; coenzyme binding; molecular_function GO:0055114; oxidation-reduction process; biological_process}	{XM_010678378.2; PREDICTED: Beta vulgaris subsp. vulgaris UDP-glucuronate 4-epimerase 4 (LOC104892440), mRNA}	{PF01370:NAD dependent epimerase/dehydratase family PF01073:3-beta hydroxysteroid dehydrogenase/isomerase family}
transcript_HQ_SAB_transcript6109/f4p0/2671	-1.8403	2.0034e-37	1.1801e-36	{KNA19235.1; hypothetical protein SOVF_063380 [Spinacia oleracea]}	{sp|Q43848|TKTC_SOLTU; Transketolase, chloroplastic OS=Solanum tuberosum PE=2 SV=1}	{nnu:104611478; K00615 E2.2.1.1, tktA, tktB transketolase 2.2.1.1 ko01200; Metabolism; Global and overview maps; Carbon metabolism | ko01230; Metabolism; Global and overview maps; Biosynthesis of amino acids | ko00030; Metabolism; Carbohydrate metabolism; pentose phosphate pathway | ko00710; Metabolism; Energy metabolism; Carbon fixation in photosynthetic organisms | ko01051; Metabolism; Metaboli…	{At2g45290; KOG0523 Transketolase G Carbohydrate transport and metabolism ;}	{GO:0016832; aldehyde-lyase activity; molecular_function GO:0005975; carbohydrate metabolic process; biological_process GO:0030976; thiamine pyrophosphate binding; molecular_function GO:0003824; NA GO:0008152; NA GO:0016624; oxidoreductase activity, acting on the aldehyde or oxo group of donors, disulfide as acceptor; molecular_function}	{XM_010694658.2; PREDICTED: Beta vulgaris subsp. vulgaris transketolase, chloroplastic (LOC104905987), mRNA}	{PF09363:XFP C-terminal domain PF00676:Dehydrogenase E1 component PF02775:Thiamine pyrophosphate enzyme, C-terminal TPP binding domain}
transcript_HQ_SAB_transcript5873/f11p0/2758	-0.63438	2.696e-06	5.5468e-06	{AFS17277.1; sucrose synthase 1 [Amaranthus cruentus/Amaranthus hypocondriacus mixed library]}	{sp|P13708|SUSY_SOYBN; Sucrose synthase OS=Glycine max GN=SS PE=1 SV=2}	{adu:107496082; K00695 E2.4.1.13 sucrose synthase 2.4.1.13 ko00500; Metabolism; Carbohydrate metabolism; Starch and sucrose metabolism}	{At3g43190; KOG0853 Glycosyltransferase M Cell wall/membrane/envelope biogenesis ;}	{GO:0016157; sucrose synthase activity; molecular_function GO:0005985; sucrose metabolic process; biological_process}	{X82504.1; C.rubrum mRNA for sucrose synthase}	{PF00862:Sucrose synthase}
transcript_HQ_SAB_transcript5815/f6p0/2743	1.6929	2.4135e-14	7.3725e-14	{XP_010687921.1; PREDICTED: probable galactinol--sucrose galactosyltransferase 6 [Beta vulgaris subsp. vulgaris]}	{sp|Q8RX87|RFS6_ARATH; Probable galactinol--sucrose galactosyltransferase 6 OS=Arabidopsis thaliana GN=RFS6 PE=2 SV=2}	{cit:102620630; K06617 E2.4.1.82 Raffinose synthase 2.4.1.82 ko00052; Metabolism; Carbohydrate metabolism; galactose metabolism}	{NA}	{NA}	{XM_010689619.2; PREDICTED: Beta vulgaris subsp. vulgaris probable galactinol--sucrose galactosyltransferase 6 (LOC104901981), mRNA}	{NA}
transcript_HQ_SAB_transcript5780/f2p0/2753	-0.43059	0.0085906	0.01305	{XP_010674968.1; PREDICTED: aldehyde dehydrogenase family 3 member H1 [Beta vulgaris subsp. vulgaris]}	{sp|Q70DU8|AL3H1_ARATH; Aldehyde dehydrogenase family 3 member H1 OS=Arabidopsis thaliana GN=ALDH3H1 PE=1 SV=2}	{bvg:104891026; K00128 ALDH aldehyde dehydrogenase (NAD+) 1.2.1.3 ko00010; Metabolism; Carbohydrate metabolism; Glycolysis / gluconeogenesis | ko00053; Metabolism; Carbohydrate metabolism; Ascorbate and aldarate metabolism | ko00620; Metabolism; Carbohydrate metabolism; Pyruvate metabolism | ko00071; Metabolism; Lipid metabolism; Fatty acid degradation | ko00561; Metabolism; Lipid metabolism; Gly…	{At1g44170; KOG2456 Aldehyde dehydrogenase C Energy production and conversion ;}	{GO:0008152; NA GO:0055114; oxidation-reduction process; biological_process GO:0016491; oxidoreductase activity; molecular_function}	{XM_010676666.2; PREDICTED: Beta vulgaris subsp. vulgaris aldehyde dehydrogenase family 3 member H1 (LOC104891026), mRNA}	{PF00171:Aldehyde dehydrogenase family}
transcript_HQ_SAB_transcript5552/f2p0/2806	-3.1415	2.2595e-25	9.8333e-25	{XP_006449975.1; hypothetical protein CICLE_v10014426mg [Citrus clementina]}	{sp|Q93ZX7|GAUT4_ARATH; Probable galacturonosyltransferase 4 OS=Arabidopsis thaliana GN=GAUT4 PE=2 SV=1}	{fve:101307568; K13648 GAUT alpha-1,4-galacturonosyltransferase 2.4.1.43 ko00520; Metabolism; Carbohydrate metabolism; Amino sugar and nucleotide sugar metabolism}	{NA}	{GO:0005680; anaphase-promoting complex; cellular_component}	{XM_010688296.2; PREDICTED: Beta vulgaris subsp. vulgaris probable galacturonosyltransferase 4 (LOC104900781), mRNA}	{PF12859:Anaphase-promoting complex subunit 1}
transcript_HQ_SAB_transcript5452/f3p0/2823	8.6008	0	0	{XP_010675265.1; PREDICTED: trifunctional UDP-glucose 4,6-dehydratase/UDP-4-keto-6-deoxy-D-glucose 3,5-epimerase/UDP-4-keto-L-rhamnose-reductase RHM1 [Beta vulgaris subsp. vulgaris]}	{sp|Q9SYM5|RHM1_ARATH; Trifunctional UDP-glucose 4,6-dehydratase/UDP-4-keto-6-deoxy-D-glucose 3,5-epimerase/UDP-4-keto-L-rhamnose-reductase RHM1 OS=Arabidopsis thaliana GN=RHM1 PE=1 SV=1}	{bvg:104891293; K12450 RHM UDP-glucose 4,6-dehydratase 4.2.1.76 ko00520; Metabolism; Carbohydrate metabolism; Amino sugar and nucleotide sugar metabolism}	{At1g78570; KOG0747 Putative NAD+-dependent epimerases G Carbohydrate transport and metabolism ;}	{GO:0003854; 3-beta-hydroxy-delta5-steroid dehydrogenase activity; molecular_function GO:0016616; oxidoreductase activity, acting on the CH-OH group of donors, NAD or NADP as acceptor; molecular_function GO:0003824; NA GO:0006694; steroid biosynthetic process; biological_process GO:0055114; oxidation-reduction process; biological_process GO:0050662; coenzyme binding; molecular_function}	{XM_010676963.2; PREDICTED: Beta vulgaris subsp. vulgaris trifunctional UDP-glucose 4,6-dehydratase/UDP-4-keto-6-deoxy-D-glucose 3,5-epimerase/UDP-4-keto-L-rhamnose-reductase RHM1 (LOC104891293), transcript variant X1, mRNA}	{PF01073:3-beta hydroxysteroid dehydrogenase/isomerase family PF01370:NAD dependent epimerase/dehydratase family}
transcript_HQ_SAB_transcript5283/f3p0/2850	0.57538	4.6485e-05	8.7313e-05	{KNA14982.1; hypothetical protein SOVF_102320 [Spinacia oleracea]}	{sp|Q8RU27|UPTG2_SOLTU; Alpha-1,4-glucan-protein synthase [UDP-forming] 2 OS=Solanum tuberosum GN=UPTG2 PE=1 SV=1}	{gmx:100788017; K13379 RGP, UTM reversibly glycosylated polypeptide / UDP-arabinopyranose mutase [EC:2.4.1.- 5.4.99.30] 2.4.1.-,5.4.99.30 ko00520; Metabolism; Carbohydrate metabolism; Amino sugar and nucleotide sugar metabolism}	{NA}	{GO:0016866; intramolecular transferase activity; molecular_function GO:0030244; cellulose biosynthetic process; biological_process}	{XM_010696958.2; PREDICTED: Beta vulgaris subsp. vulgaris alpha-1,4-glucan-protein synthase [UDP-forming] 2 (LOC104907929), mRNA}	{PF03214:Reversibly glycosylated polypeptide}
transcript_HQ_SAB_transcript5245/f2p0/2842	-0.88714	0.00071474	0.0012166	{KNA14857.1; hypothetical protein SOVF_103590 [Spinacia oleracea]}	{sp|Q9SG80|ASD1_ARATH; Alpha-L-arabinofuranosidase 1 OS=Arabidopsis thaliana GN=ASD1 PE=1 SV=1}	{bvg:104889634; K01209 abfA alpha-N-arabinofuranosidase 3.2.1.55 ko00520; Metabolism; Carbohydrate metabolism; Amino sugar and nucleotide sugar metabolism}	{NA}	{GO:0046556; alpha-N-arabinofuranosidase activity; molecular_function GO:0046373; L-arabinose metabolic process; biological_process}	{XM_010674900.2; PREDICTED: Beta vulgaris subsp. vulgaris alpha-L-arabinofuranosidase 1 (LOC104889634), transcript variant X2, mRNA}	{PF06964:Alpha-L-arabinofuranosidase C-terminal domain}
transcript_HQ_SAB_transcript5199/f3p0/2778	1.213	0.00046827	0.0008105	{KNA14187.1; hypothetical protein SOVF_109550 [Spinacia oleracea]}	{sp|Q93ZX7|GAUT4_ARATH; Probable galacturonosyltransferase 4 OS=Arabidopsis thaliana GN=GAUT4 PE=2 SV=1}	{fve:101307568; K13648 GAUT alpha-1,4-galacturonosyltransferase 2.4.1.43 ko00520; Metabolism; Carbohydrate metabolism; Amino sugar and nucleotide sugar metabolism}	{NA}	{GO:0005680; anaphase-promoting complex; cellular_component}	{XM_010688296.2; PREDICTED: Beta vulgaris subsp. vulgaris probable galacturonosyltransferase 4 (LOC104900781), mRNA}	{PF12859:Anaphase-promoting complex subunit 1}
transcript_HQ_SAB_transcript5189/f2p0/2869	#NAME?	8.6665e-24	3.6008e-23	{KNA06061.1; hypothetical protein SOVF_184280 [Spinacia oleracea]}	{sp|Q94A08|RFS2_ARATH; Probable galactinol--sucrose galactosyltransferase 2 OS=Arabidopsis thaliana GN=RFS2 PE=2 SV=2}	{egr:104445147; K06617 E2.4.1.82 Raffinose synthase 2.4.1.82 ko00052; Metabolism; Carbohydrate metabolism; galactose metabolism}	{NA}	{NA}	{XM_010668755.2; PREDICTED: Beta vulgaris subsp. vulgaris probable galactinol--sucrose galactosyltransferase 2 (LOC104884158), transcript variant X1, mRNA}	{NA}
transcript_HQ_SAB_transcript5148/f3p0/2824	-0.88908	4.695e-10	1.1893e-09	{XP_010667722.1; PREDICTED: polygalacturonate 4-alpha-galacturonosyltransferase [Beta vulgaris subsp. vulgaris]}	{sp|Q9LE59|GAUT1_ARATH; Polygalacturonate 4-alpha-galacturonosyltransferase OS=Arabidopsis thaliana GN=GAUT1 PE=1 SV=1}	{sly:101268802; K13648 GAUT alpha-1,4-galacturonosyltransferase 2.4.1.43 ko00520; Metabolism; Carbohydrate metabolism; Amino sugar and nucleotide sugar metabolism}	{NA}	{GO:0016757; transferase activity, transferring glycosyl groups; molecular_function}	{XM_010669420.2; PREDICTED: Beta vulgaris subsp. vulgaris polygalacturonate 4-alpha-galacturonosyltransferase (LOC104884733), mRNA}	{PF01501:Glycosyl transferase family 8}
transcript_HQ_SAB_transcript5043/f2p0/2883	-2.1326	3.3401e-41	2.1206e-40	{XP_010676845.1; PREDICTED: probable trehalase [Beta vulgaris subsp. vulgaris]}	{sp|Q9SU50|TRE1_ARATH; Trehalase OS=Arabidopsis thaliana GN=TRE1 PE=2 SV=1}	{bvg:104892576; K01194 TREH, treA, treF alpha,alpha-trehalase 3.2.1.28 ko00500; Metabolism; Carbohydrate metabolism; Starch and sucrose metabolism}	{At4g24040; KOG0602 Neutral trehalase G Carbohydrate transport and metabolism ;}	{GO:0004555; alpha,alpha-trehalase activity; molecular_function GO:0005991; trehalose metabolic process; biological_process}	{XM_010678543.2; PREDICTED: Beta vulgaris subsp. vulgaris probable trehalase (LOC104892576), mRNA}	{PF01204:Trehalase}
transcript_HQ_SAB_transcript5042/f2p0/2880	1.9067	8.7493e-19	3.1102e-18	{KMT02758.1; hypothetical protein BVRB_8g193450 [Beta vulgaris subsp. vulgaris]}	{sp|P49031|SPSA_BETVU; Probable sucrose-phosphate synthase OS=Beta vulgaris GN=SPS PE=2 SV=1}	{pper:PRUPE_ppa000639mg; K00696 E2.4.1.14 sucrose-phosphate synthase 2.4.1.14 ko00500; Metabolism; Carbohydrate metabolism; Starch and sucrose metabolism}	{At5g20280; KOG0853 Glycosyltransferase M Cell wall/membrane/envelope biogenesis ;}	{GO:0005985; sucrose metabolic process; biological_process GO:0016157; sucrose synthase activity; molecular_function}	{NM_001303068.1; Beta vulgaris subsp. vulgaris probable sucrose-phosphate synthase (SBSPS1), mRNA}	{PF00862:Sucrose synthase}
transcript_HQ_SAB_transcript4941/f2p0/2888	-2.0636	5.7515e-08	1.309e-07	{KNA05833.1; hypothetical protein SOVF_186640 [Spinacia oleracea]}	{sp|Q41059|GLGB2_PEA; 1,4-alpha-glucan-branching enzyme 1, chloroplastic/amyloplastic (Fragment) OS=Pisum sativum GN=SBEII PE=1 SV=1}	{gmx:100792499; K00700 GBE1, glgB 1,4-alpha-glucan branching enzyme 2.4.1.18 ko00500; Metabolism; Carbohydrate metabolism; Starch and sucrose metabolism}	{At2g36390; KOG0470 1,4-alpha-glucan branching enzyme/starch branching enzyme II G Carbohydrate transport and metabolism ;}	{GO:0005975; carbohydrate metabolic process; biological_process GO:0043169; cation binding; molecular_function GO:0004553; hydrolase activity, hydrolyzing O-glycosyl compounds; molecular_function GO:0003824; NA}	{XM_010694249.2; PREDICTED: Beta vulgaris subsp. vulgaris 1,4-alpha-glucan-branching enzyme 1, chloroplastic/amyloplastic (LOC104905653), mRNA}	{PF02806:Alpha amylase, C-terminal all-beta domain PF02922:Carbohydrate-binding module 48 (Isoamylase N-terminal domain) PF00128:Alpha amylase, catalytic domain}
transcript_HQ_SAB_transcript4637/f2p0/2970	-3.0057	2.2412e-74	2.4655e-73	{XP_010671592.1; PREDICTED: alpha-glucosidase [Beta vulgaris subsp. vulgaris]}	{sp|O04893|AGLU_SPIOL; Alpha-glucosidase OS=Spinacia oleracea PE=1 SV=1}	{bvg:104888352; K01187 malZ alpha-glucosidase 3.2.1.20 ko00052; Metabolism; Carbohydrate metabolism; galactose metabolism | ko00500; Metabolism; Carbohydrate metabolism; Starch and sucrose metabolism}	{At5g11720; KOG1065 Maltase glucoamylase and related hydrolases, glycosyl hydrolase family 31 G Carbohydrate transport and metabolism ;}	{GO:0004553; hydrolase activity, hydrolyzing O-glycosyl compounds; molecular_function GO:0005975; carbohydrate metabolic process; biological_process}	{XM_010673290.2; PREDICTED: Beta vulgaris subsp. vulgaris alpha-glucosidase (LOC104888352), mRNA}	{PF01055:Glycosyl hydrolases family 31 }
transcript_HQ_SAB_transcript4259/f2p0/3006	-1.5774	2.2689e-27	1.0424e-26	{XP_010685628.1; PREDICTED: alpha-glucan phosphorylase, H isozyme [Beta vulgaris subsp. vulgaris]}	{sp|Q9SD76|PHS2_ARATH; Alpha-glucan phosphorylase 2, cytosolic OS=Arabidopsis thaliana GN=PHS2 PE=1 SV=1}	{mdm:103447449; K00688 PYG, glgP glycogen phosphorylase 2.4.1.1 ko00500; Metabolism; Carbohydrate metabolism; Starch and sucrose metabolism | ko02026; Cellular Processes; Cellular community - prokaryotes; Biofilm formation - Escherichia coli | ko04910; Organismal Systems; Endocrine system; Insulin signaling pathway | ko04922; Organismal Systems; Endocrine system; Glucagon signaling pathway | ko04…	{At3g46970; KOG2099 Glycogen phosphorylase G Carbohydrate transport and metabolism ;}	{GO:0008184; glycogen phosphorylase activity; molecular_function GO:0005975; carbohydrate metabolic process; biological_process}	{XM_010687326.2; PREDICTED: Beta vulgaris subsp. vulgaris alpha-glucan phosphorylase, H isozyme (LOC104900011), mRNA}	{PF00343:Carbohydrate phosphorylase}
transcript_HQ_SAB_transcript4202/f6p0/3004	Inf	7.0221e-302	7.501e-300	{XP_010693244.1; PREDICTED: granule-bound starch synthase 2, chloroplastic/amyloplastic [Beta vulgaris subsp. vulgaris]}	{sp|Q43847|SSY2_SOLTU; Granule-bound starch synthase 2, chloroplastic/amyloplastic OS=Solanum tuberosum GN=SS2 PE=1 SV=3}	{spen:107011298; K00703 glgA starch synthase 2.4.1.21 ko00500; Metabolism; Carbohydrate metabolism; Starch and sucrose metabolism | ko02026; Cellular Processes; Cellular community - prokaryotes; Biofilm formation - Escherichia coli; spen:107011298; K00703 glgA starch synthase 2.4.1.21 ko00500; Metabolism; Carbohydrate metabolism; Starch and sucrose metabolism | ko02026; Cellular Processes; Cellul…	{NA}	{NA}	{XM_010694943.2; PREDICTED: Beta vulgaris subsp. vulgaris granule-bound starch synthase 2, chloroplastic/amyloplastic (LOC104906215), transcript variant X2, mRNA}	{NA}
transcript_HQ_SAB_transcript4116/f3p0/3039	12.472	0	0	{XP_010671592.1; PREDICTED: alpha-glucosidase [Beta vulgaris subsp. vulgaris]}	{sp|O04893|AGLU_SPIOL; Alpha-glucosidase OS=Spinacia oleracea PE=1 SV=1}	{bvg:104888352; K01187 malZ alpha-glucosidase 3.2.1.20 ko00052; Metabolism; Carbohydrate metabolism; galactose metabolism | ko00500; Metabolism; Carbohydrate metabolism; Starch and sucrose metabolism}	{At5g11720; KOG1065 Maltase glucoamylase and related hydrolases, glycosyl hydrolase family 31 G Carbohydrate transport and metabolism ;}	{GO:0004553; hydrolase activity, hydrolyzing O-glycosyl compounds; molecular_function GO:0005975; carbohydrate metabolic process; biological_process}	{XM_010673290.2; PREDICTED: Beta vulgaris subsp. vulgaris alpha-glucosidase (LOC104888352), mRNA}	{PF01055:Glycosyl hydrolases family 31 }
transcript_HQ_SAB_transcript4060/f6p0/2979	-1.459	3.3926e-23	1.3824e-22	{XP_010693244.1; PREDICTED: granule-bound starch synthase 2, chloroplastic/amyloplastic [Beta vulgaris subsp. vulgaris]}	{sp|Q43847|SSY2_SOLTU; Granule-bound starch synthase 2, chloroplastic/amyloplastic OS=Solanum tuberosum GN=SS2 PE=1 SV=3}	{spen:107011298; K00703 glgA starch synthase 2.4.1.21 ko00500; Metabolism; Carbohydrate metabolism; Starch and sucrose metabolism | ko02026; Cellular Processes; Cellular community - prokaryotes; Biofilm formation - Escherichia coli; spen:107011298; K00703 glgA starch synthase 2.4.1.21 ko00500; Metabolism; Carbohydrate metabolism; Starch and sucrose metabolism | ko02026; Cellular Processes; Cellul…	{NA}	{NA}	{XM_010694943.2; PREDICTED: Beta vulgaris subsp. vulgaris granule-bound starch synthase 2, chloroplastic/amyloplastic (LOC104906215), transcript variant X2, mRNA}	{NA}
transcript_HQ_SAB_transcript4052/f2p0/3046	-0.28943	0.030004	0.042527	{XP_010680522.1; PREDICTED: galactinol--sucrose galactosyltransferase [Beta vulgaris subsp. vulgaris]}	{sp|Q8VWN6|RFS_PEA; Galactinol--sucrose galactosyltransferase OS=Pisum sativum GN=RFS PE=1 SV=1}	{bvg:104895650; K06617 E2.4.1.82 Raffinose synthase 2.4.1.82 ko00052; Metabolism; Carbohydrate metabolism; galactose metabolism}	{NA}	{NA}	{XM_010682220.2; PREDICTED: Beta vulgaris subsp. vulgaris galactinol--sucrose galactosyltransferase (LOC104895650), mRNA}	{NA}
transcript_HQ_SAB_transcript4028/f3p0/3047	-0.73546	7.5282e-09	1.8002e-08	{XP_010684343.1; PREDICTED: sucrose synthase [Beta vulgaris subsp. vulgaris]}	{sp|Q42652|SUSY_BETVU; Sucrose synthase (Fragment) OS=Beta vulgaris GN=SS1 PE=2 SV=1}	{gra:105791444; K00695 E2.4.1.13 sucrose synthase 2.4.1.13 ko00500; Metabolism; Carbohydrate metabolism; Starch and sucrose metabolism}	{At4g02280; KOG0853 Glycosyltransferase M Cell wall/membrane/envelope biogenesis ;}	{GO:0016743; carboxyl- or carbamoyltransferase activity; molecular_function GO:0005985; sucrose metabolic process; biological_process GO:0016597; amino acid binding; molecular_function GO:0016157; sucrose synthase activity; molecular_function GO:0006520; cellular amino acid metabolic process; biological_process}	{XM_010686041.2; PREDICTED: Beta vulgaris subsp. vulgaris sucrose synthase (SBSS1), mRNA}	{PF00862:Sucrose synthase PF00185:Aspartate/ornithine carbamoyltransferase, Asp/Orn binding domain}
transcript_HQ_SAB_transcript3907/f3p0/3089	0.51313	0.0054757	0.0085028	{XP_010678736.1; PREDICTED: probable alpha,alpha-trehalose-phosphate synthase [UDP-forming] 9 [Beta vulgaris subsp. vulgaris]}	{sp|O80738|TPS10_ARATH; Probable alpha,alpha-trehalose-phosphate synthase [UDP-forming] 10 OS=Arabidopsis thaliana GN=TPS10 PE=2 SV=1}	{bvg:104894247; K16055 TPS trehalose 6-phosphate synthase/phosphatase [EC:2.4.1.15 3.1.3.12] 2.4.1.15,3.1.3.12 ko00500; Metabolism; Carbohydrate metabolism; Starch and sucrose metabolism}	{At1g60140; KOG1050 Trehalose-6-phosphate synthase component TPS1 and related subunits G Carbohydrate transport and metabolism ;}	{GO:0005992; trehalose biosynthetic process; biological_process GO:0003824; NA}	{XM_010680434.2; PREDICTED: Beta vulgaris subsp. vulgaris probable alpha,alpha-trehalose-phosphate synthase [UDP-forming] 9 (LOC104894247), mRNA}	{PF00982:Glycosyltransferase family 20 PF02358:Trehalose-phosphatase}
[truncated: 379 more rows]
